# Supplementary material for: Cryo-EM structure revealed a novel F-actin binding motif in a Legionella pneumophila lysine fatty acyltransferase
Source: eLife journal article supplement (doi:10.7554/elife.106975), 2025-06-17
Supplement: fig1-data2 [file Figure1_sourcedata 2.pdf › Figure1_sourcedata 2.pdf]

Figure 1, Source Data 1. Original Western Blots and SDS-PAGE corresponding to Figure 1D, E and F.
