# Supplementary material for: Cryo-EM structure revealed a novel F-actin binding motif in a Legionella pneumophila lysine fatty acyltransferase
Source: eLife journal article supplement (doi:10.7554/elife.106975), 2025-06-17
Supplement: fig3-data2 [file Figure 3 source data 2.pdf › Figure 3 source data 2.pdf]

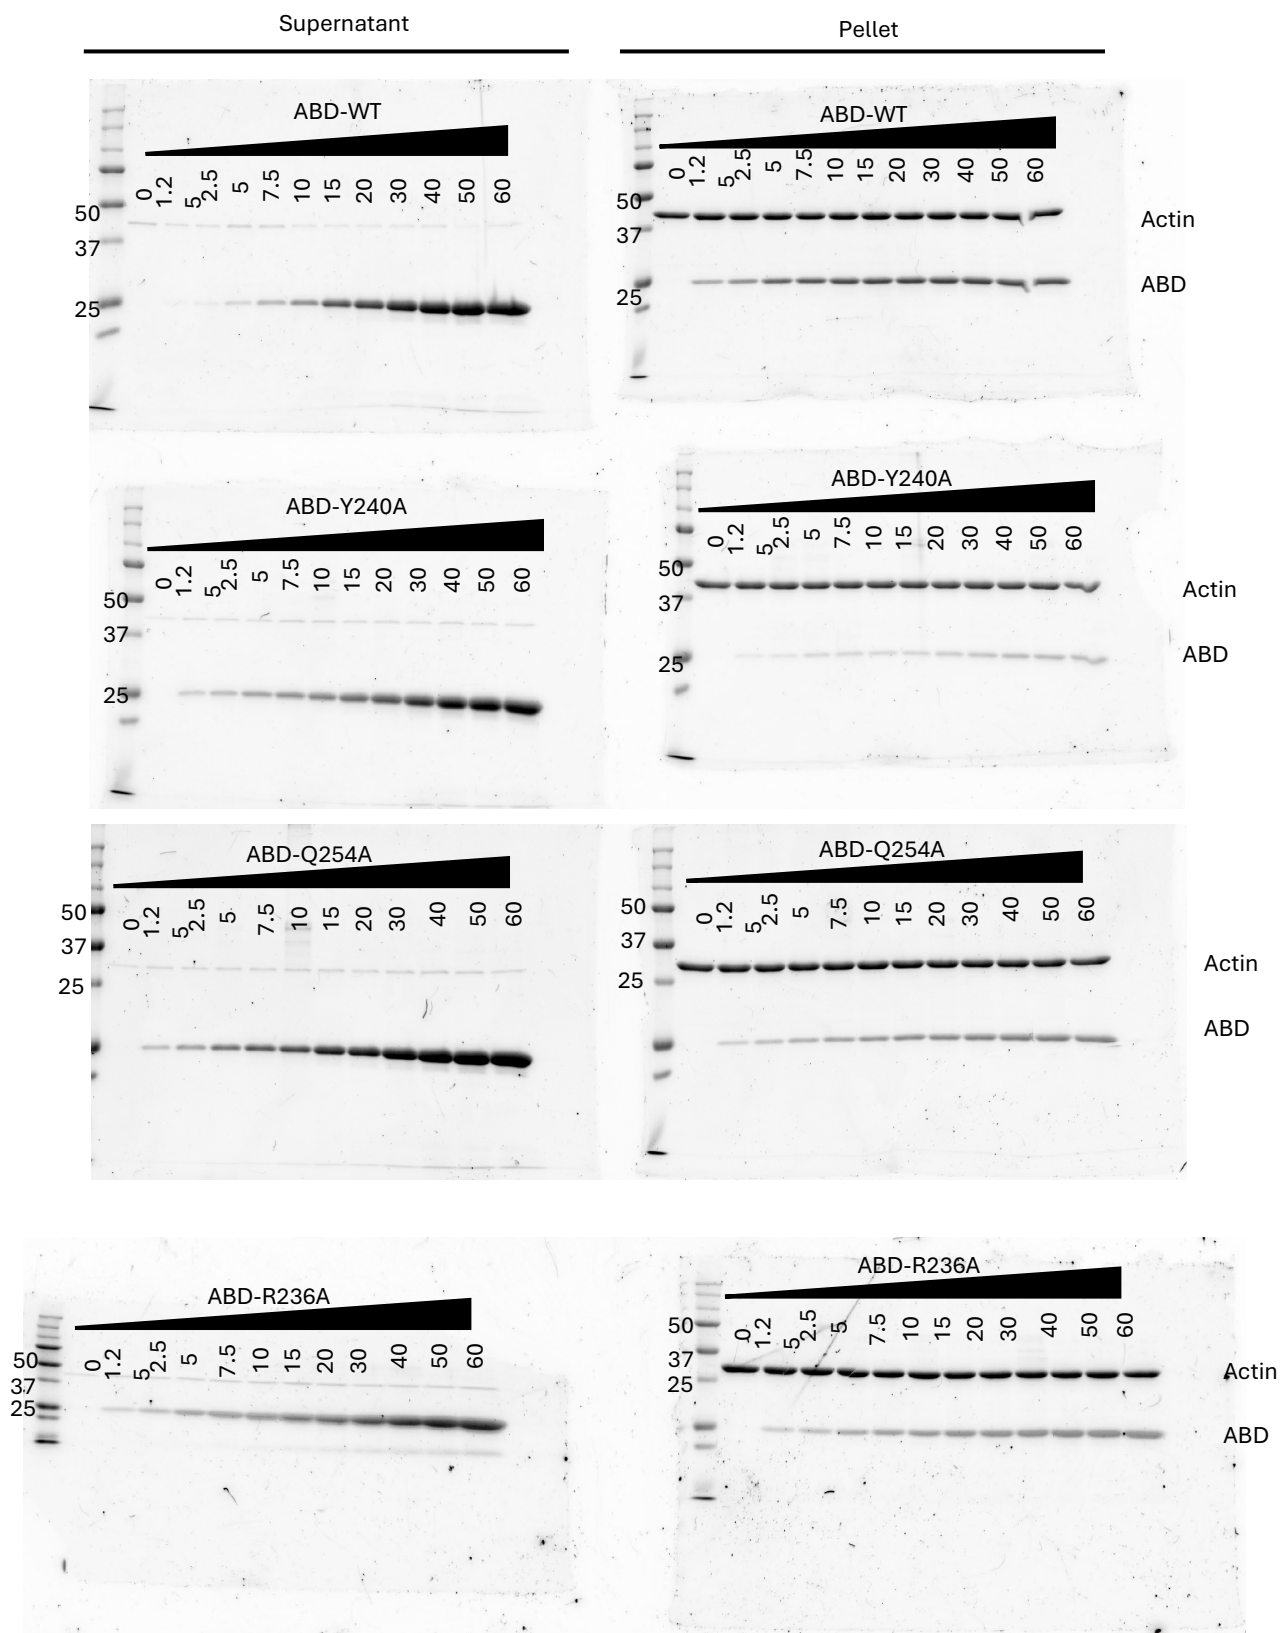

Figure 3, source data 1. SDS-PAGE of co-sedimentation assay. Replicate one of three.

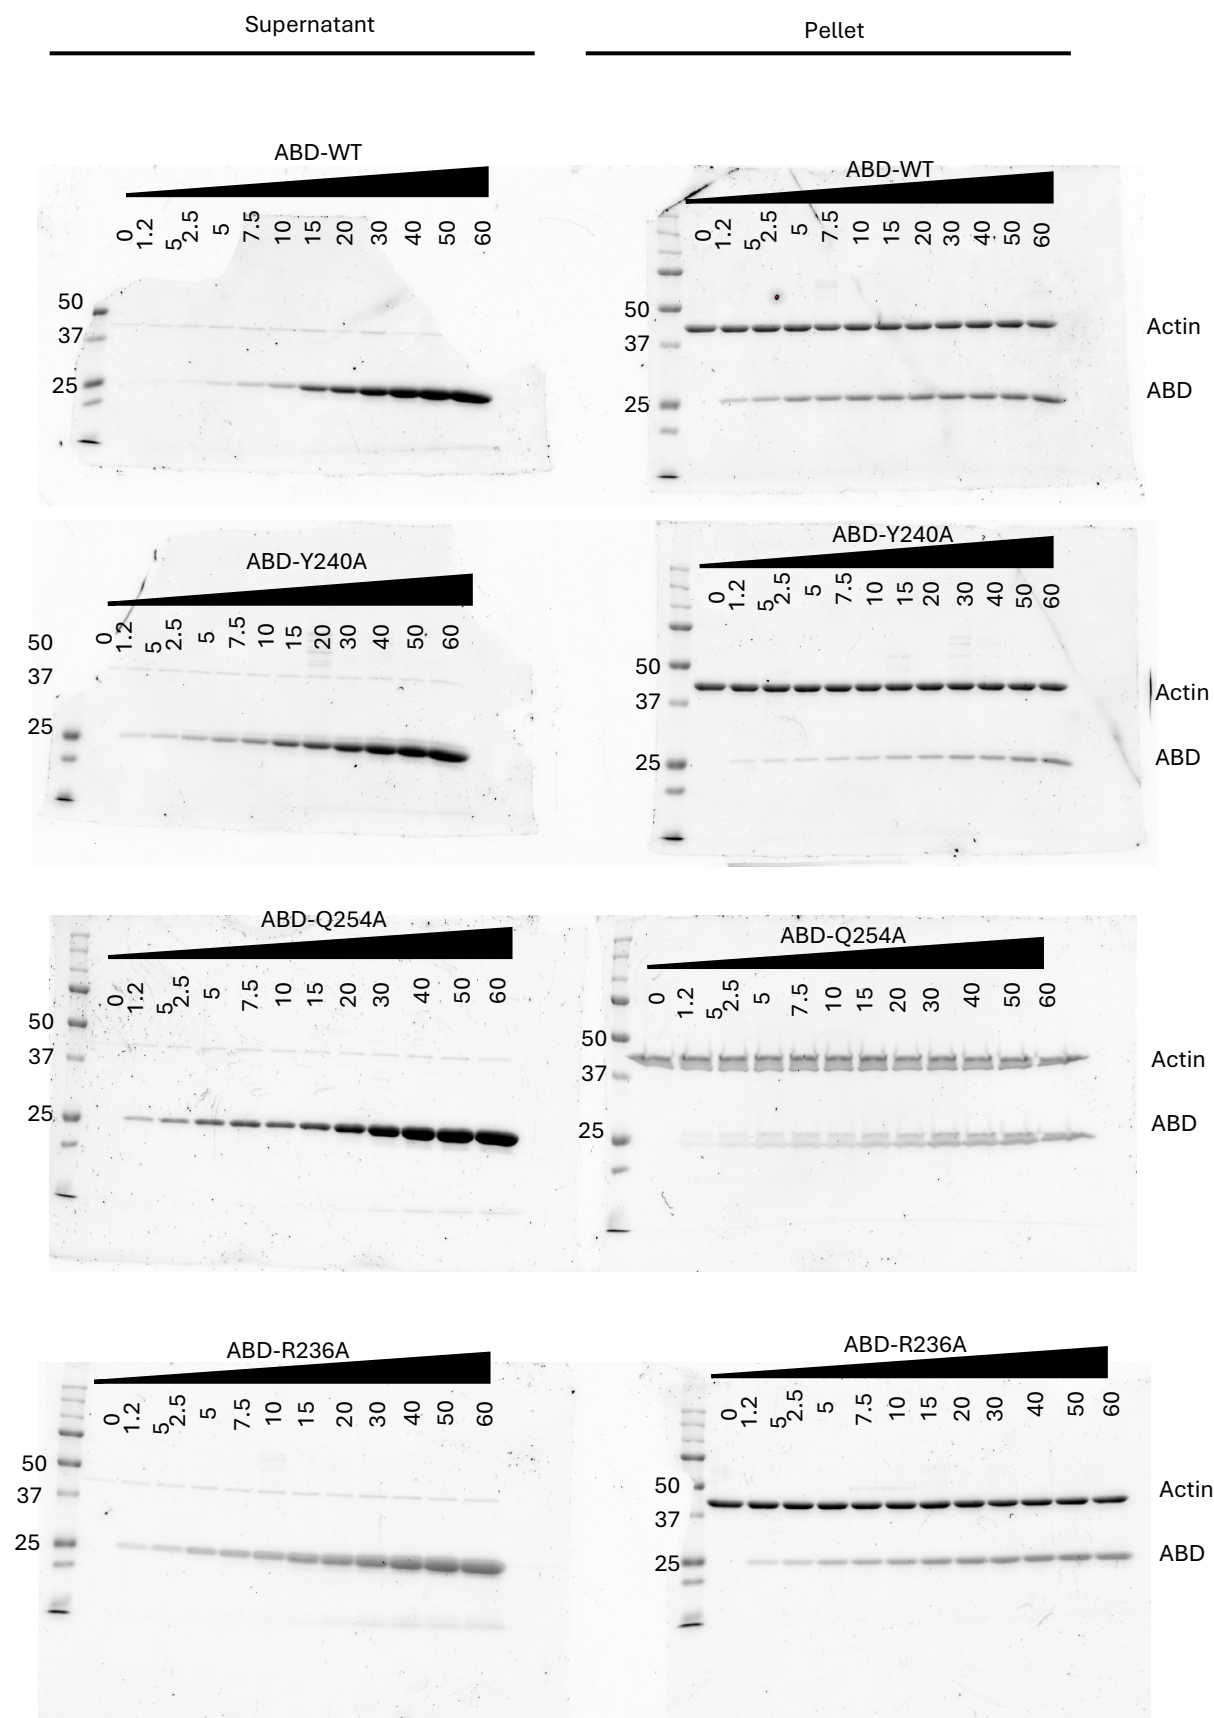

Figure 3, source data 1. SDS-PAGE of co-sedimentation assay. Replicate two of three.

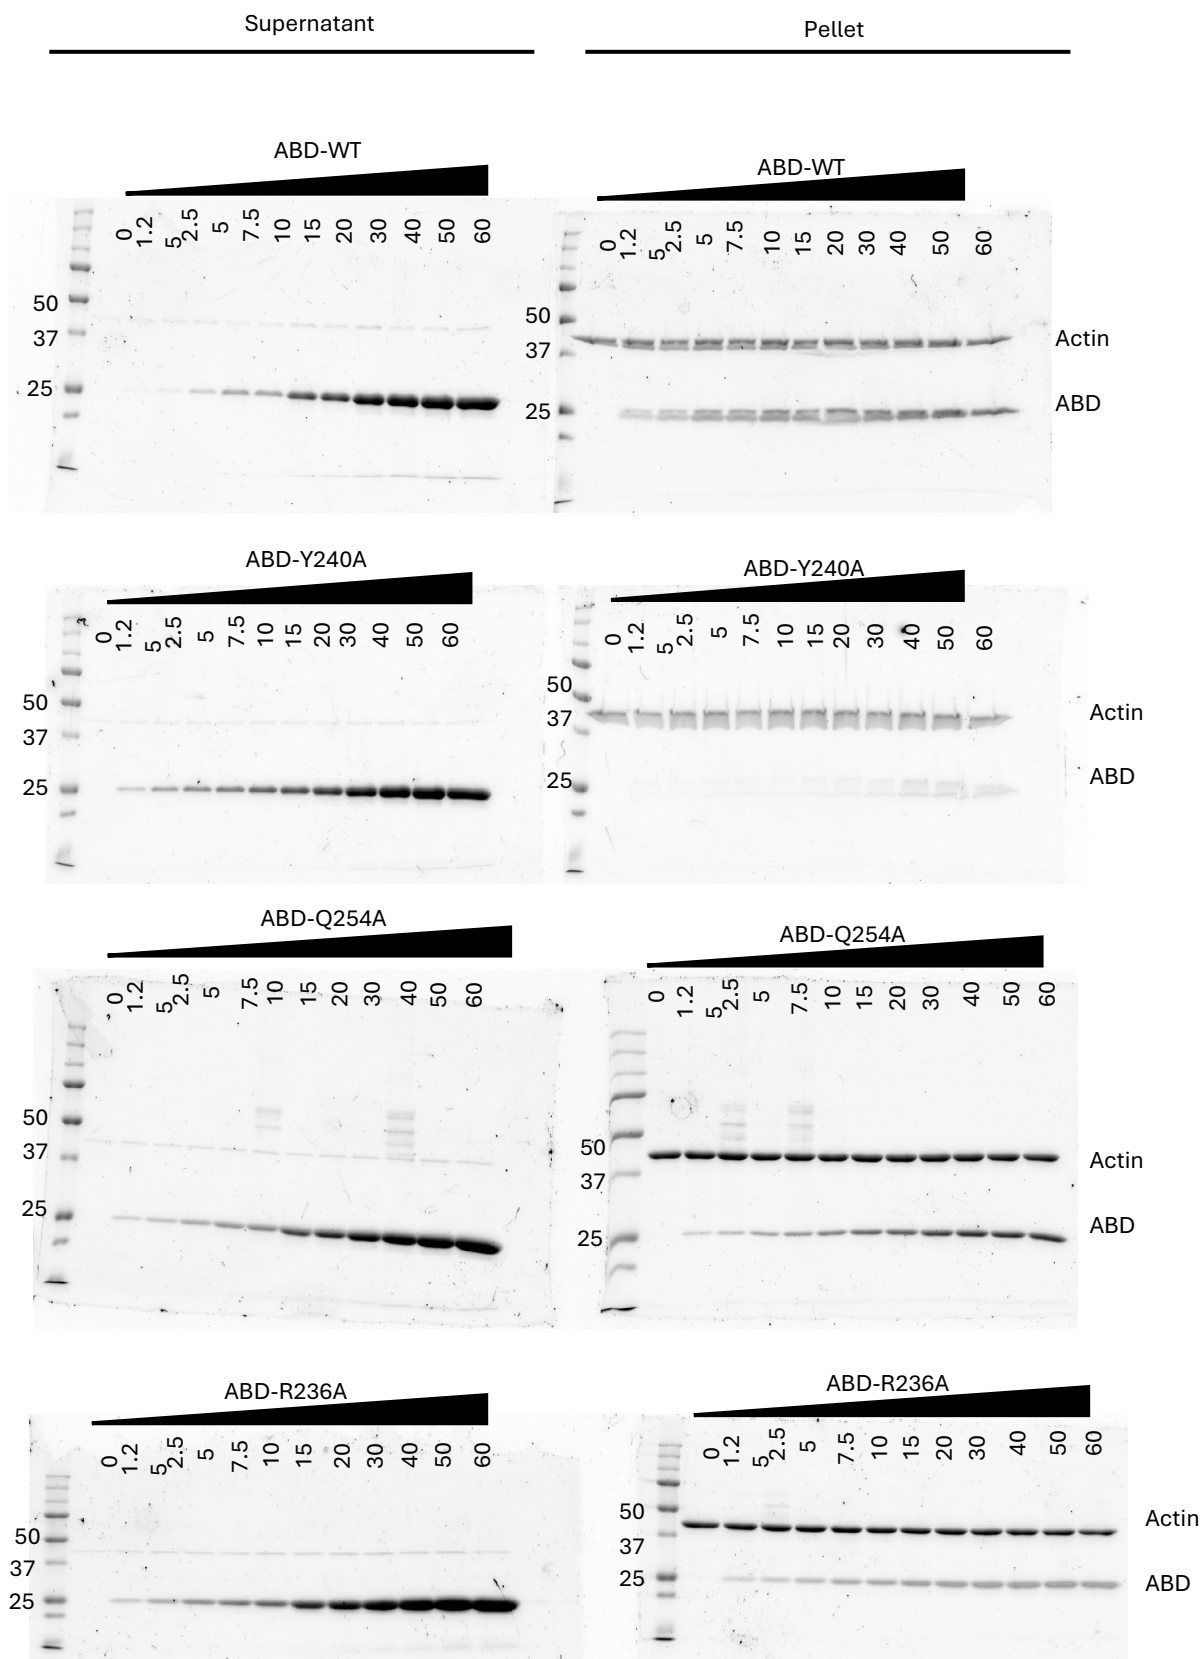

Figure 3, source data 1. SDS-PAGE of co-sedimentation assay. Replicate three of three.
