# Supplementary material for: Cryo-EM structure revealed a novel F-actin binding motif in a Legionella pneumophila lysine fatty acyltransferase
Source: eLife journal article supplement (doi:10.7554/elife.106975), 2025-06-17
Supplement: fig6-figsupp1-data2 [file Figure 6-figure supplement 2 source data 2.pdf › Figure 6-figure supplement 2 source data 2.pdf]

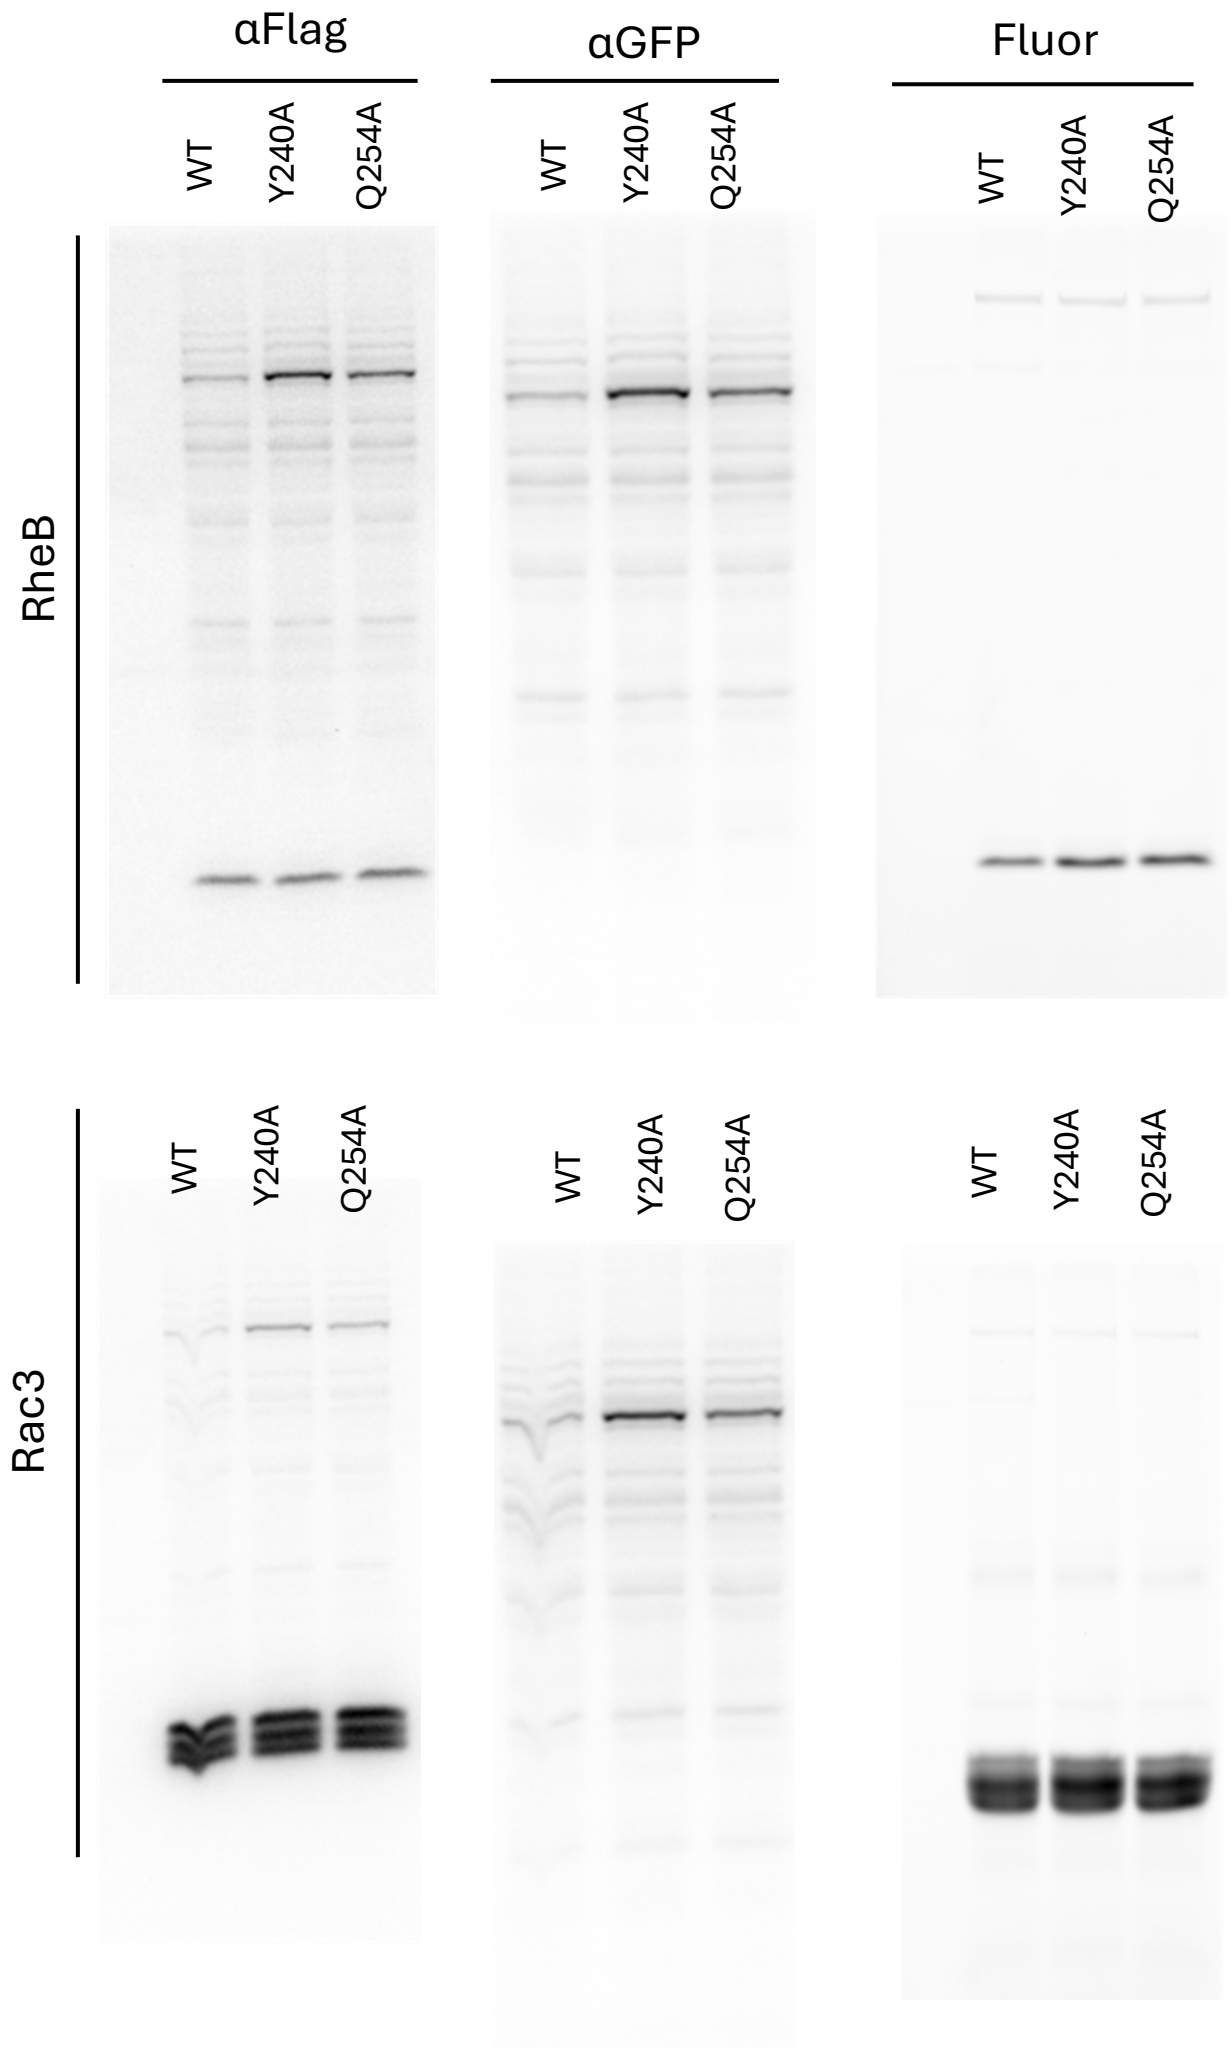

Figure 6-figure supplement 2 source Data 1. Original membranes for Supplemental Figure A (Flag-RheB) and B (Flag-Rac3)
