# Supplementary material for: Cryo-EM structure revealed a novel F-actin binding motif in a Legionella pneumophila lysine fatty acyltransferase
Source: eLife journal article supplement (doi:10.7554/elife.106975), 2025-06-17
Supplement: fig6-figsupp1-data2 [file Figure 6-figure supplemtal 1 data source 2.pdf › Figure 6-figure supplemtal 1 data source 2.pdf]

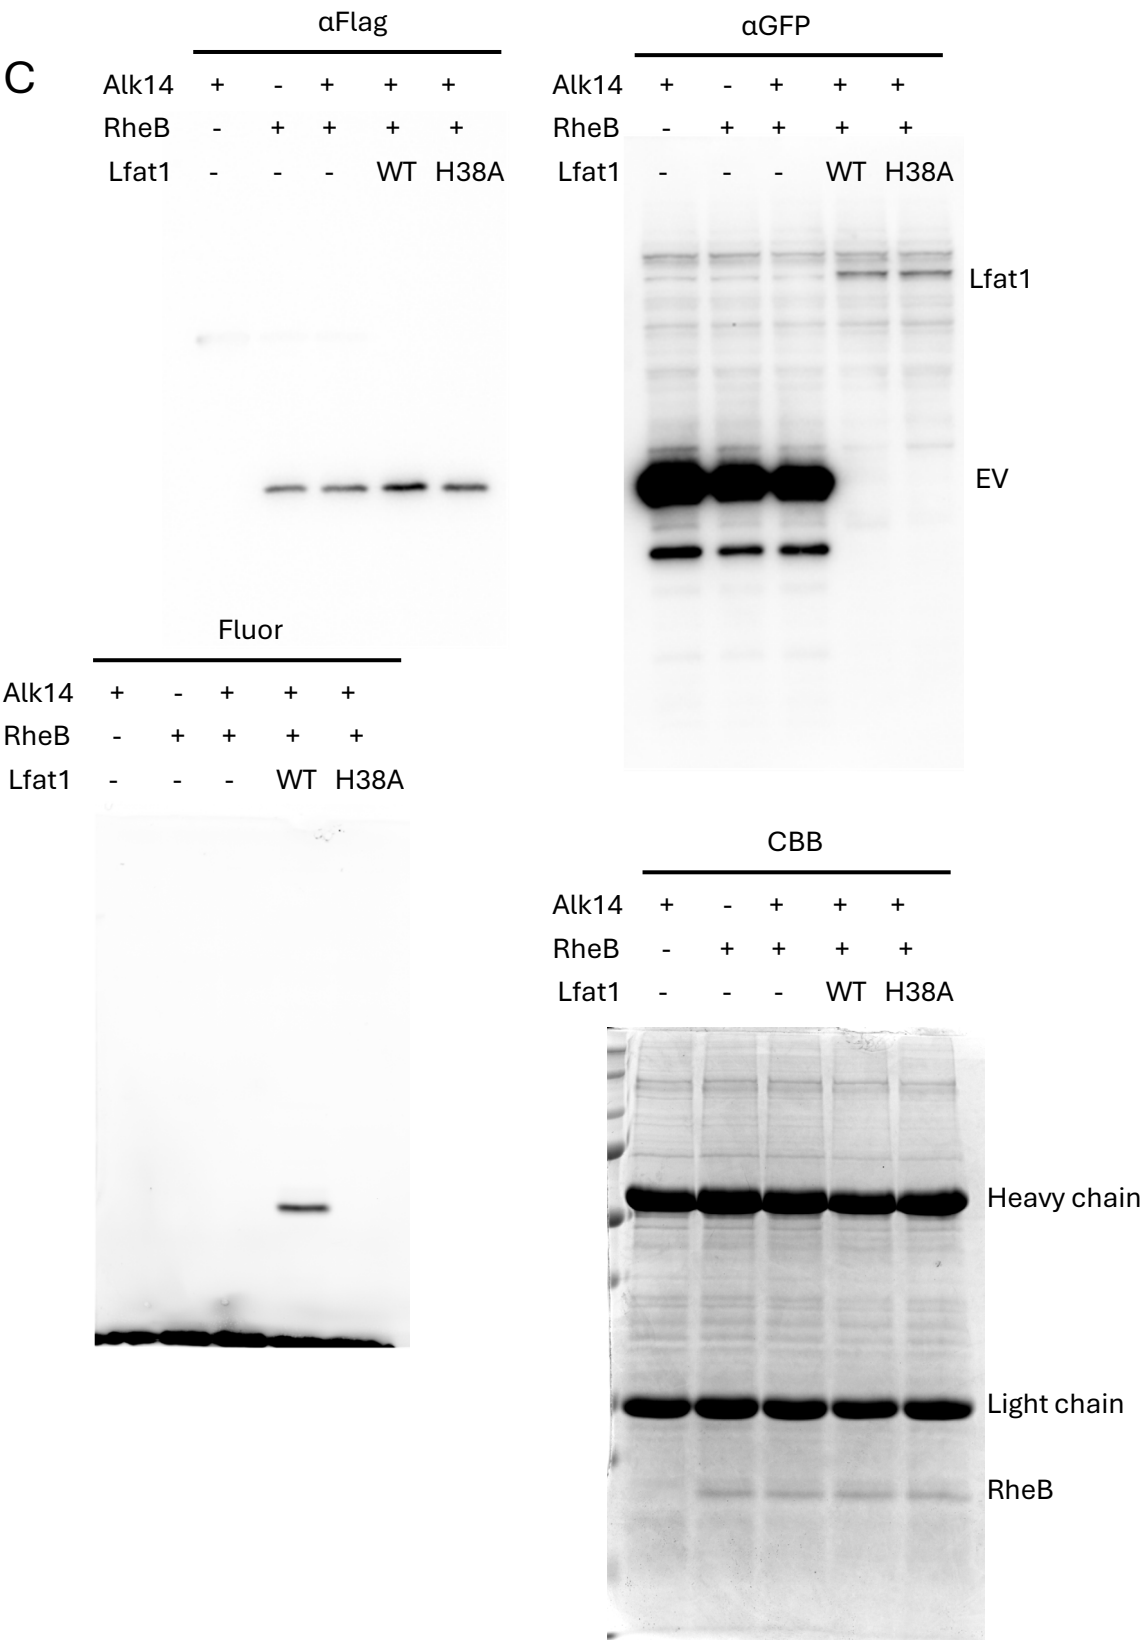

Figure 6-figure supplement 1, Source data 2. Original membranes corresponding to 6-figure supplement 1C (Flag-RheB).

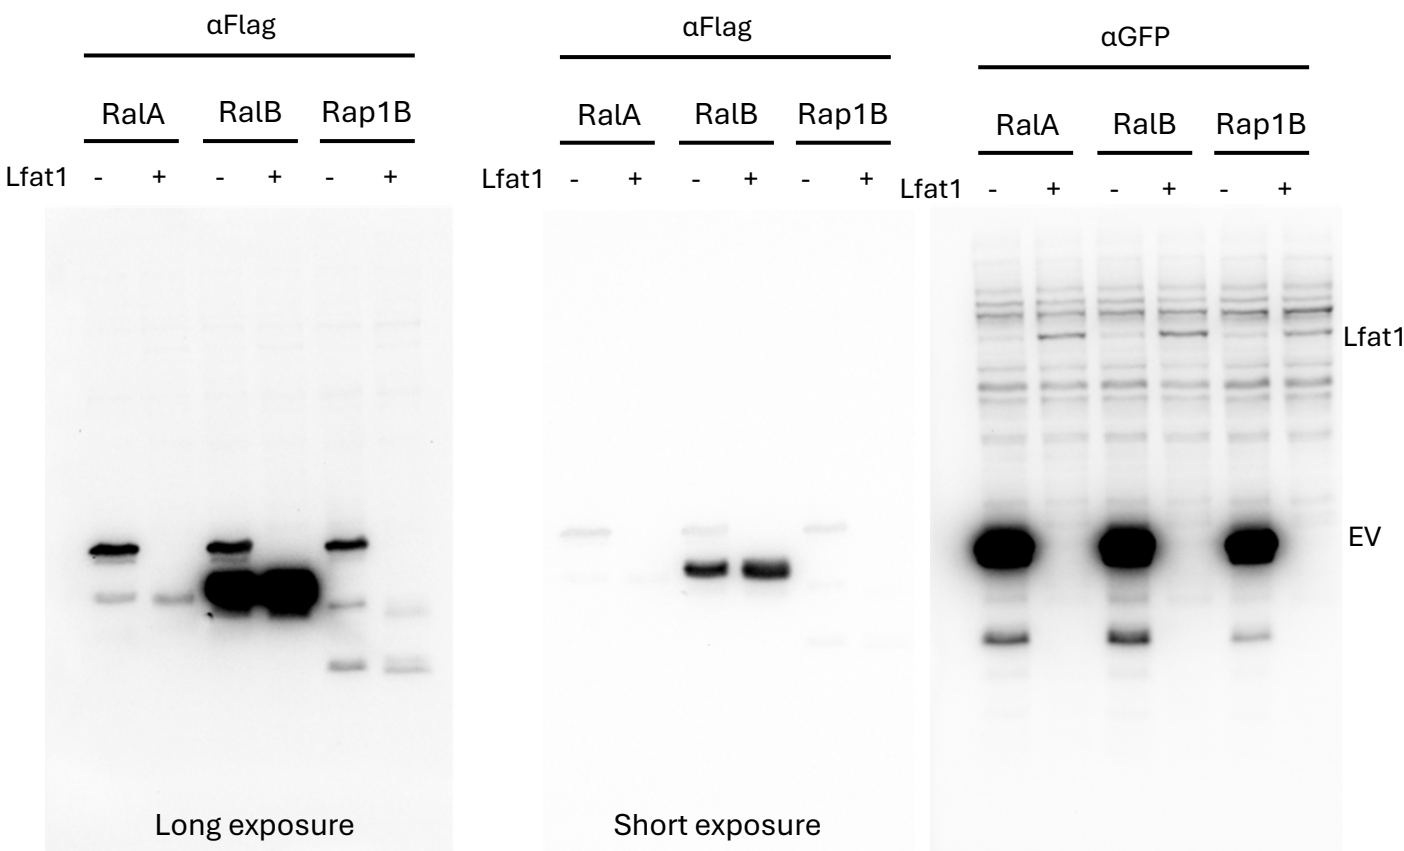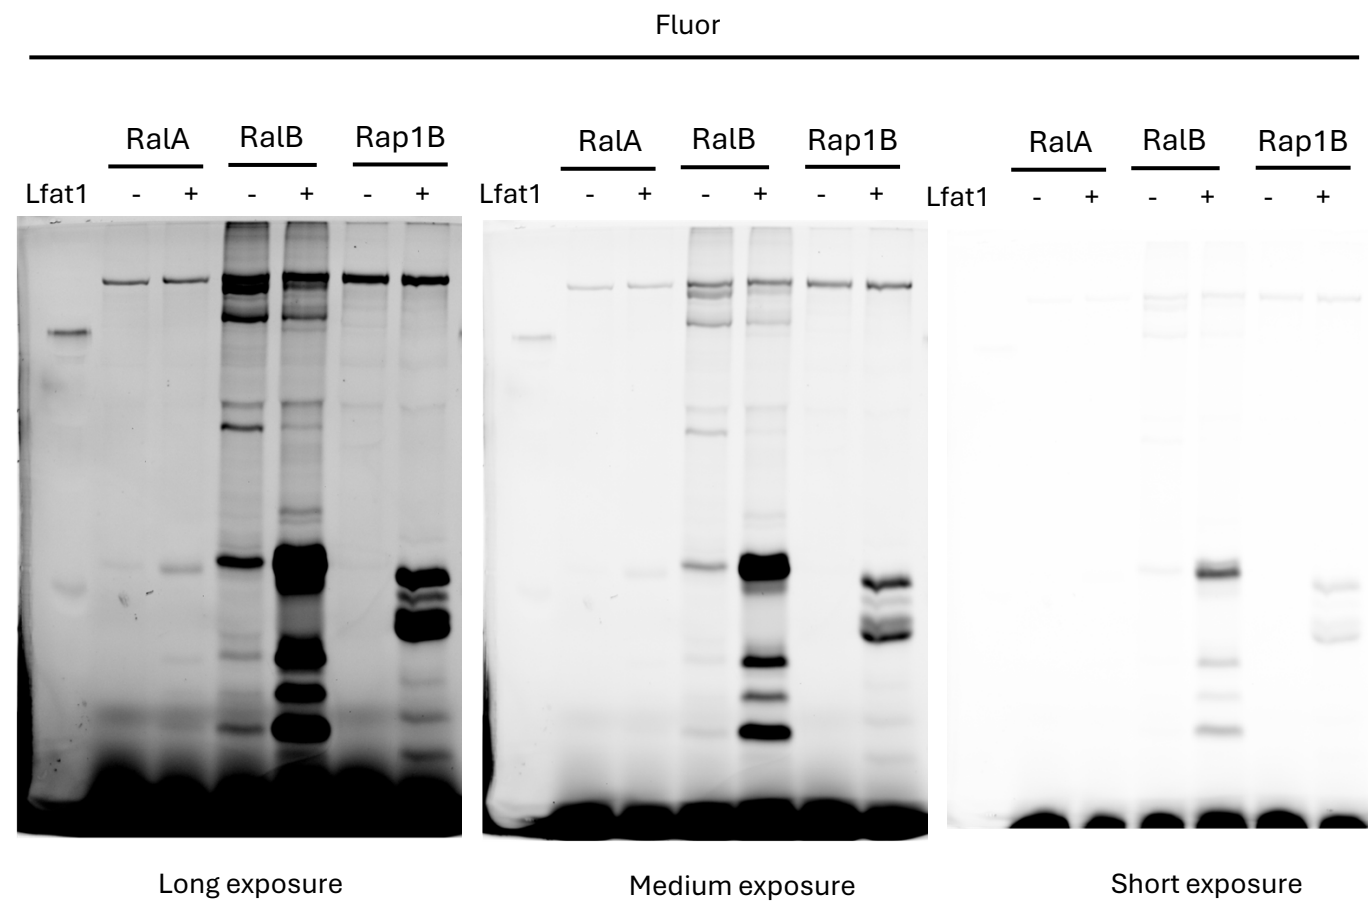

Figure 6-figure supplement 1, Source data 2. Original membranes corresponding to 6-figure supplement 1D (Flag-RalA), E (Flag-RalB), and F (Flag-Rap1B).
