# Supplementary material for: Cryo-EM structure revealed a novel F-actin binding motif in a Legionella pneumophila lysine fatty acyltransferase
Source: eLife. 2026 Jan 28;14:RP106975. doi: 10.7554/eLife.106975 (PMC12851578; doi:10.7554/eLife.106975)
Supplement: Supplementary file 1. [file elife-106975-supp1.xlsx]

## Sheet: Sheet1
	Construct	Forward primer	reverse primer
1	Lfat1-NC	ATCAAAAGCCGTGATtttactgaaggaaggcaacc	ATCACGGCTTTTGATttcagaaatcatatcttcttcatgag
2	Lfat1-ABD	GGGGATGGATCCatggattcggtaacagcaatgactattatc	GACCTCGAGTTAatcacggcttttgatgaattg
3	ABD- R236A	caaattacagctacagagGCGactataaattatttaaat	atttaaataatttatagtCGCctctgtagctgtaatttg
4	ABD-Y240A	gagagaactataaatgctttaaataaactgaaa	tttcagtttatttaaagcatttatagttctctc
5	ABD-Q254A	cctaaaaccaaaacagctttgattgagcttact	agtaagctcaatcaaagctgttttggttttagg
6	ABD-S1	GGGGGGGGGATCCttggaagtcaacttggagcaaag	CCCCCCCCTCGAGCTAattgattttaatatccagctttttcaaatcttc
7	ABD-S2	GGGGGGGGGATCCttggaaaaagatgaattgattaaacaacag	CCCCCCCCTCGAGCTAaagctcaatctgttgcagtttc
8	ABD-S3	GGGGGGGGGATCCaaagatttaaaggggcaattagc	CCCCCCCCTCGAGGGCTAgcttatctcatgttgagaatttattg
9	ABD-α1	caaattacagctacagagGCGactataaattatttaaat	CCCCCCCCTCGAGCTAatttttcagtttatttaaataatttatagttctc
10	ABD-S1-α1	GGGGGGGGGATCCttggaagtcaacttggagcaaag	CCCCCCCCTCGAGCTAatttttcagtttatttaaataatttatagttctc
11	ABD-S2-α1	GGGGGGGGGATCCATGttaaccaattcttaccaaaccc	CCCCCCCCTCGAGCTAatttttcagtttatttaaataatttatagttctc
12	ABD-S3-α1	GGGGGGGGGATCCaaagatttaaaggggcaattagc	CCCCCCCCTCGAGCTAatttttcagtttatttaaataatttatagttctc
13	ABD-α2	GGGGGGGGGATCCGCCACCATGGTGcctgatcctaaaaccaaaacac	CCCCCCCCTCGAGGGatcacggcttttgatgaattg
14	ABD-S1-α2	GGGGGGGGGATCCGCCACCATGGTGcctgatcctaaaaccaaaacac	CCCCCCCCTCGAGAAattgattttaatatccagctttttcaaatcttc
15	ABD-S2-α2	GGGGGGGGGATCCGCCACCATGGTGcctgatcctaaaaccaaaacac	CCCCCCCCTCGAGGGaagctcaatctgttgcagtttc
16	ABD-S3-α2	GGGGGGGGGATCCGCCACCATGGTGcctgatcctaaaaccaaaacac	CCCCCCCCTCGAGGGgcttatctcatgttgagaatttattg
17	LFat1-H38A	gataaaggggaaaatgtaggaGCCgttaattttactatagaaattg	caatttctatagtaaaattaacGGCtcctacattttcccctttatc
18	LFat1-C403A	ctattcatttctttttaataacGCTgccagtagtgctaaacgttg	caacgtttagcactactggcAGCgttattaaaaagaaatgaatag
