# Supplementary material for: Cryo-EM structure revealed a novel F-actin binding motif in a Legionella pneumophila lysine fatty acyltransferase
Source: eLife. 2026 Jan 28;14:RP106975. doi: 10.7554/eLife.106975 (PMC12851578; doi:10.7554/eLife.106975)
Supplement: Supplementary file 2. [file elife-106975-supp2.xlsx]

## Sheet: Sheet1
	Table 3	plasmid table
	Description	ID	Source
1	Lfat1 FL in pET28a His-SUMO	YM2526	This study
2	Lfat1-Full length in pEGFPC1	YM2527	This study
3	Lfat1-NC in pEGFPC1	YM2528	This study
4	Lfat1-ABD in pEGFPC1	YM2529	This study
5	Lfat1-ABD in pET28a His-SUMO	YM2530	This study
6	ABD- R236A in pEGFPC1	YM2531	This study
7	ABD-Y240A in pEGFPC1	YM2532	This study
8	ABD-Q254A in pEGFPC1	YM2533	This study
9	ABD- R236A in pET28a His-SUMO	YM2534	This study
10	ABD-Y240A in pET28a His-SUMO	YM2535	This study
11	ABD-Q254A in pET28a His-SUMO	YM2536	This study
12	ABD-S1 in pEGFPC1	YM2537	This study
13	ABD-S1 in pEGFPC1	YM2538	This study
14	ABD-S1 in pEGFPC1	YM2539	This study
15	ABD-α1 in pmCherryC1	YM2540	This study
16	ABD-S1-α1 in pmCherryC1	YM2541	This study
17	ABD-S2-α1 in pmCherryC1	YM2542	This study
18	ABD-S3-α1 in pmCherryC1	YM2543	This study
19	ABD-α2 in pEGFPC1	YM2544	This study
20	ABD-S1-α2 in pEGFPC1	YM2545	This study
21	ABD-S2-α2 in pEGFPC1	YM2546	This study
22	ABD-S3-α2 in pEGFPC1	YM2547	This study
23	LFat1-H38A in pEGFPC1	YM2548	This study
24	LFat1-C403A in pEGFPC1	YM2549	This study
