# Supplementary material for: Cryo-EM structure revealed a novel F-actin binding motif in a Legionella pneumophila lysine fatty acyltransferase
Source: eLife. 2026 Jan 28;14:RP106975. doi: 10.7554/eLife.106975 (PMC12851578; doi:10.7554/eLife.106975)
Supplement: Supplementary file 3. [file elife-106975-supp3.xlsx]

## Sheet: Proteins
Checked	Protein FDR Confidence: Combined	Master	Accession	Description	Exp. q-value: Combined	Sum PEP Score	Coverage [%]	# Peptides	# PSMs	# Unique Peptides	# AAs	MW [kDa]	calc. pI	Score Sequest HT: Sequest HT	# Peptides (by Search Engine): Sequest HT	Pfam IDs	Entrez Gene ID	Ensembl Gene ID	Gene Symbol	Gene ID	WikiPathways	Reactome Pathways	KEGG Pathways	# Protein Pathway Groups	# Razor Peptides	Abundance Ratio: (Heavy) / (Light)	Abundance Ratio P-Value: (Heavy) / (Light)	Abundance Ratio Variability [%]: (Heavy) / (Light)	Abundances (Grouped): Light	Abundances (Grouped): Heavy	Abundance: F1: Light, Sample	Abundance: F1: Heavy, Sample	Found in Sample: [S1] F1: Light, Sample	Found in Sample: [S3] F1: Heavy, Sample	# Protein Groups	Modifications
TRUE	High	Master Protein	P02786	Transferrin receptor protein 1 OS=Homo sapiens OX=9606 GN=TFRC PE=1 SV=2	0	466.599	44	34	233	34	760	84.8	6.61	788.26	34	Pf02225, Pf04253, Pf04389	7037	ENSG00000072274	TFRC	D3DXB0; hsa:7037; P02786; Q1HE24; Q59G55; Q9UCN0; Q9UCU5; Q9UDF9; Q9UK21	Iron metabolism in placenta; Ferroptosis; 3q29 copy number variation syndrome	RHOA GTPase cycle; RHOG GTPase cycle; RAC2 GTPase cycle; RAC3 GTPase cycle; Golgi Associated Vesicle Biogenesis; RHOC GTPase cycle; RND2 GTPase cycle; CDC42 GTPase cycle; RAC1 GTPase cycle; RHOQ GTPase cycle; RHOB GTPase cycle; RHOJ GTPase cycle; RND1 GTPase cycle; Cargo recognition for clathrin-mediated endocytosis; Transferrin endocytosis and recycling; RHOH GTPase cycle	HIF-1 signaling pathway; Endocytosis; Phagosome; Ferroptosis; Hematopoietic cell lineage	25	0	0.909	0.703297	19.66	105.9	94.1	1.61477e+09	1.101e+09	High	High	1
	Checked	Confidence	Annotated Sequence	Modifications	Qvality PEP	Qvality q-value	# Protein Groups	# Proteins	# PSMs	Master Protein Accessions	Positions in Master Proteins	Modifications in Master Proteins	# Missed Cleavages	Theo. MH+ [Da]	Abundance Ratio: (Heavy) / (Light)	Abundance Ratio P-Value: (Heavy) / (Light)	Abundance Ratio Variability [%]: (Heavy) / (Light)	Abundances (Grouped): Light	Abundances (Grouped): Heavy	Abundance: F1: Light, Sample	Abundance: F1: Heavy, Sample	Precursor Quan Result ID	Quan Info	Quan Channel	Found in Sample: [S1] F1: Light, Sample	Found in Sample: [S3] F1: Heavy, Sample	Confidence (by Search Engine): Sequest HT	DeltaM [ppm] (by Search Engine): Sequest HT	Percolator q-Value (by Search Engine): Sequest HT	Percolator PEP (by Search Engine): Sequest HT	XCorr (by Search Engine): Sequest HT	Top Apex RT [min]
	TRUE	High	[R].AAAEVAGQFVIK.[L]		0.000436931	0.00021741	1	1	3	P02786	P02786 [589-600]		0	1203.67	0.01	1e-17		200		9.25838e+06		5		Light	High	Not Found	High	0.81	0.0002	0.0003413	3.17	38.01
	TRUE	High	[K].AFTYINLDKAVLGTSNFK.[V]		0.0191266	0.0016188	1	1	1	P02786	P02786 [478-495]		1	2002.06	0.909	0.753582	0	104.8	95.2	1.03967e+06	725889	228		Light	High	Peak Found	High	-0.28	0.001475	0.01472	3.01	62.39
	TRUE	High	[K].DENLALYVENQFR.[E]		1.31426e-06	9.84928e-05	1	1	3	P02786	P02786 [162-174]		0	1610.78	0.915	0.566064	0	104.4	95.6	1.58751e+07	11159467	953		Light	High	Peak Found	High	0.31	0.0001206	9.189e-07	3.9	68.63
	TRUE	High	[K].DENLALYVENQFR.[E]	1xLabel:13C(6)15N(4) [R13]	1.33273e-06	9.84928e-05	1	1	3	P02786	P02786 [162-174]		0	1620.79								953	Redundant	Heavy	Peak Found	High	High	-0.08	0.0001206	9.311e-07	4.53	68.63
	TRUE	High	[K].DSAQNSVIIVDK.[N]		0.000400399	9.84928e-05	1	1	1	P02786	P02786 [194-205]		0	1288.67	0.933	0.635102	0	103.5	96.5	26022652	18638260	1292		Light	High	Peak Found	High	0.61	0.0001206	0.0003138	3.53	27.18
	TRUE	High	[K].DSAQNSVIIVDK.[N]	1xLabel:13C(6)15N(2) [K12]	7.46784e-06	9.84928e-05	1	1	1	P02786	P02786 [194-205]		0	1296.69								1292	Redundant	Heavy	Peak Found	High	High	0.29	0.0001206	5.401e-06	3.71	27.18
	TRUE	High	[K].DSAQNSVIIVDKNGR.[L]		0.128691	0.00934995	1	1	1	P02786	P02786 [194-208]		1	1615.84								1293	Redundant	Light	High	Peak Found	High	-0.2	0.007205	0.09507	2.68	20.72
	TRUE	High	[K].DSAQNSVIIVDKNGR.[L]	1xLabel:13C(6)15N(2) [K12]; 1xLabel:13C(6)15N(4) [R15]	0.00155008	0.000424254	1	1	2	P02786	P02786 [194-208]		1	1633.86	0.924	0.662909	0	104	96	6.60339e+06	4.68434e+06	1293		Heavy	Peak Found	High	High	0.11	0.0003475	0.001277	3.08	20.72
	TRUE	High	[R].EAGSQKDENLALYVENQFR.[E]		4.58251e-06	9.84928e-05	1	1	4	P02786	P02786 [156-174]		1	2211.07								1469	Redundant	Light	High	Peak Found	High	-0.03	0.0001206	3.277e-06	4.9	58.1
	TRUE	High	[R].EAGSQKDENLALYVENQFR.[E]	1xLabel:13C(6)15N(2) [K6]; 1xLabel:13C(6)15N(4) [R19]	0.000136898	9.84928e-05	1	1	3	P02786	P02786 [156-174]		1	2229.09	0.171	1e-17	0	170.8	29.2	34323222	4501192	1469		Heavy	Peak Found	High	High	0.19	0.0001206	0.0001043	4.74	58.1
	TRUE	High	[R].EEPGEDFPAAR.[R]		0.0941469	0.00660813	1	1	1	P02786	P02786 [110-120]		0	1217.54	0.659	0.076169	0	120.6	79.4	4661761	2359511	1645		Light	High	Peak Found	High	-0.01	0.005107	0.06871	1.61	23.06
	TRUE	High	[K].GFVEPDHYVVVGAQR.[D]		6.18574e-07	9.84928e-05	1	1	4	P02786	P02786 [395-409]		0	1672.84	0.89	0.488272	0	105.8	94.2	105572144	72167051	2538		Light	High	Peak Found	High	-0.41	0.0001206	4.273e-07	4.53	38.09
	TRUE	High	[K].GFVEPDHYVVVGAQR.[D]	1xLabel:13C(6)15N(4) [R15]	9.53297e-06	9.84928e-05	1	1	4	P02786	P02786 [395-409]		0	1682.85								2538	Redundant	Heavy	Peak Found	High	High	-0.13	0.0001206	6.917e-06	4.34	38.09
	TRUE	High	[K].HPVTGQFLYQDSNWASK.[V]		1.37045e-06	9.84928e-05	1	1	3	P02786	P02786 [515-531]		0	1977.95								3036	Redundant	Light	High	Peak Found	High	0.06	0.0001206	9.602e-07	3.96	43.32
	TRUE	High	[K].HPVTGQFLYQDSNWASK.[V]	1xLabel:13C(6)15N(2) [K17]	0.000176684	9.84928e-05	1	1	2	P02786	P02786 [515-531]		0	1985.96	0.873	0.40763	0	106.8	93.2	1.37284e+07	9.19978e+06	3036		Heavy	Peak Found	High	High	-0.68	0.0001206	0.0001354	3.42	43.32
	TRUE	High	[R].HVFWGSGSHTLPALLENLK.[L]		4.18359e-09	9.84928e-05	1	1	8	P02786	P02786 [699-717]		0	2106.11	0.907	0.50962	0	104.9	95.1	1.40692e+07	9804045	3061		Light	High	Peak Found	High	-0.01	0.0001206	2.671e-09	5.53	70.67
	TRUE	High	[R].HVFWGSGSHTLPALLENLK.[L]	1xLabel:13C(6)15N(2) [K19]	8.12046e-07	9.84928e-05	1	1	4	P02786	P02786 [699-717]		0	2114.13								3061	Redundant	Heavy	Peak Found	High	High	-0.11	0.0001206	5.648e-07	4.3	70.67
	TRUE	High	[R].KLSEKLDSTDFTGTIK.[L]		8.17674e-06	9.84928e-05	1	1	2	P02786	P02786 [130-145]		2	1782.95	1.065	0.912203	0	96.8	103.2	8615750	7.04941e+06	3183		Light	High	Peak Found	High	0.71	0.0001206	5.896e-06	5.1	33.59
	TRUE	High	[R].KLSEKLDSTDFTGTIK.[L]	3xLabel:13C(6)15N(2) [K1; K5; K16]	0.0012742	0.000339819	1	1	3	P02786	P02786 [130-145]		2	1806.99								3183	Redundant	Heavy	Peak Found	High	High	-0.77	0.0002891	0.001037	3.27	33.59
	TRUE	High	[K].LAQMFSDMVLK.[D]		3.27446e-05	9.84928e-05	1	1	2	P02786	P02786 [429-439]		0	1282.65	1.028	0.965709	0	98.6	101.4	14881443	11744318	3357		Light	High	Peak Found	High	-0.35	0.0001206	2.42e-05	2.84	57.95
	TRUE	High	[K].LAQMFSDMVLK.[D]	1xLabel:13C(6)15N(2) [K11]	1.6424e-05	9.84928e-05	1	1	2	P02786	P02786 [429-439]		0	1290.67								3357	Redundant	Heavy	Peak Found	High	High	0.29	0.0001206	1.199e-05	3.72	57.95
	TRUE	High	[K].LAQMFSDMVLK.[D]	1xOxidation [M8]	0.00262307	0.000632611	1	1	1	P02786	P02786 [429-439]		0	1298.65	0.57	0.00338397	0	127.4	72.6	18113547	7.92782e+06	3358		Light	High	Peak Found	High	0.32	0.0004992	0.002187	2.38	45.67
	TRUE	High	[K].LAQMFSDMVLK.[D]	1xOxidation [M]; 1xLabel:13C(6)15N(2) [K11]	0.000597692	0.00021741	1	1	4	P02786	P02786 [429-439]		0	1306.66								3358	Redundant	Heavy	Peak Found	High	High	-0.45	0.0002	0.0004723	3.04	45.67
	TRUE	High	[K].LAQMFSDMVLK.[D]	2xOxidation [M4; M8]	0.000900157	0.00021741	1	1	1	P02786	P02786 [429-439]		0	1314.64	1.081	0.851875	0	96.1	103.9	12075980	10022923	3359		Light	High	Peak Found	High	-0.54	0.0002	0.0007226	2.63	34.31
	TRUE	High	[K].LAQMFSDMVLK.[D]	2xOxidation [M4; M8]; 1xLabel:13C(6)15N(2) [K11]	0.000124273	9.84928e-05	1	1	1	P02786	P02786 [429-439]		0	1322.66								3359	Redundant	Heavy	Peak Found	High	High	-0.01	0.0001206	9.425e-05	3.46	34.31
	TRUE	High	[K].LAQMFSDMVLKDGFQPSR.[S]	1xOxidation [M4]	0.00103333	0.00021741	1	1	1	P02786	P02786 [429-446]		1	2086.01	0.67	0.165752	0	119.8	80.2	2417272	1.24367e+06	3360		Light	High	Peak Found	High	0.48	0.0002	0.0008386	3.47	53.88
	TRUE	High	[K].LAVDEEENADNNTK.[A]		0.000585911	0.00021741	1	1	1	P02786	P02786 [40-53]		0	1561.7	0.5	0.0236104	0	133.3	66.7	252593	96967.1	3390		Light	High	Peak Found	High	0.56	0.0002	0.0004628	3.11	15.94
	TRUE	High	[K].LAVDEEENADNNTKANVTKPK.[R]		1.9562e-06	9.84928e-05	1	1	3	P02786	P02786 [40-60]		1	2300.14								3391	Redundant	Light	High	Peak Found	High	0.89	0.0001206	1.377e-06	3.68	15.02
	TRUE	High	[K].LAVDEEENADNNTKANVTKPK.[R]	3xLabel:13C(6)15N(2) [K14; K19; K21]	2.39391e-09	9.84928e-05	1	1	2	P02786	P02786 [40-60]		1	2324.18	0.771	0.151287	0	113	87	1.13361e+07	6.70928e+06	3391		Heavy	Peak Found	High	High	0.07	0.0001206	1.516e-09	3.83	15.02
	TRUE	High	[K].LAVDEEENADNNTKANVTKPKR.[C]		0.0652731	0.00483692	1	1	1	P02786	P02786 [40-61]		2	2456.24	0.798	0.44939	0	111.3	88.7	173298	106152	3393		Light	High	Peak Found	High	-0.88	0.003777	0.0476	2.64	13.12
	TRUE	High	[K].LDSTDFTGTIK.[L]		0.000578183	0.00021741	1	1	1	P02786	P02786 [135-145]		0	1197.6	1.048	0.942442	0	97.7	102.3	57994980	46682200	3476		Light	High	Peak Found	High	-0.34	0.0002	0.0004578	2.82	35.5
	TRUE	High	[K].LDSTDFTGTIK.[L]	1xLabel:13C(6)15N(2) [K11]	5.25673e-05	9.84928e-05	1	1	1	P02786	P02786 [135-145]		0	1205.61								3476	Redundant	Heavy	Peak Found	High	High	-0.77	0.0001206	3.908e-05	3.05	35.5
	TRUE	High	[K].LLNENSYVPR.[E]		2.36001e-05	9.84928e-05	1	1	4	P02786	P02786 [146-155]		0	1204.63	0.894	0.50037	0	105.6	94.4	216166720	1.48373e+08	4041		Light	High	Peak Found	High	-0.06	0.0001206	1.741e-05	3.37	29.75
	TRUE	High	[K].LLNENSYVPR.[E]	1xLabel:13C(6)15N(4) [R10]	4.90347e-05	9.84928e-05	1	1	3	P02786	P02786 [146-155]		0	1214.64								4041	Redundant	Heavy	Peak Found	High	High	0.27	0.0001206	3.651e-05	3.58	29.75
	TRUE	High	[K].ILNIFGVIK.[G]		5.14817e-05	9.84928e-05	1	1	5	P02786	P02786 [386-394]		0	1016.65								4049	Redundant	Light	High	Peak Found	High	0.19	0.0001206	3.83e-05	2.28	66.98
	TRUE	High	[K].ILNIFGVIK.[G]	1xLabel:13C(6)15N(2) [K9]	4.73581e-05	9.84928e-05	1	1	7	P02786	P02786 [386-394]		0	1024.66	1.07	0.864884	0	96.6	103.4	52450756	43111940	4049		Heavy	Peak Found	High	High	0.04	0.0001206	3.526e-05	3	66.98
	TRUE	High	[K].IQVKDSAQNSVIIVDKNGR.[L]		0.000136898	9.84928e-05	1	1	1	P02786	P02786 [190-208]		2	2084.15								4396	No Quan Values	Light	High	Not Found	High	-2.59	0.0001206	0.0001037	4.28
	TRUE	High	[K].LSEKLDSTDFTGTIK.[L]		1.99646e-05	9.84928e-05	1	1	4	P02786	P02786 [131-145]		1	1654.85	1.081	0.827972	0	96.1	103.9	29702824	24661282	4443		Light	High	Peak Found	High	-0.23	0.0001206	1.467e-05	3.85	36.9
	TRUE	High	[K].LSEKLDSTDFTGTIK.[L]	2xLabel:13C(6)15N(2) [K4; K15]	0.000642898	0.00021741	1	1	3	P02786	P02786 [131-145]		1	1670.88								4443	Redundant	Heavy	Peak Found	High	High	-0.2	0.0002	0.0005123	3.78	36.9
	TRUE	High	[K].LTHDVELNLDYER.[Y]		3.51527e-06	9.84928e-05	1	1	2	P02786	P02786 [601-613]		0	1616.79	0.969	0.803777	0	101.6	98.4	7046072	5243458	4584		Light	High	Peak Found	High	-0.05	0.0001206	2.511e-06	3.95	37.51
	TRUE	High	[K].LTHDVELNLDYER.[Y]	1xLabel:13C(6)15N(4) [R13]	0.0143208	0.00137984	1	1	1	P02786	P02786 [601-613]		0	1626.8								4584	Redundant	Heavy	Peak Found	High	High	-0.43	0.001311	0.01131	2.44
	TRUE	High	[K].LTVSNVLK.[E]		0.000789053	0.00021741	1	1	1	P02786	P02786 [375-382]		0	873.54	1.091	0.795419	0	95.7	104.3	81709848	68451864	4633		Light	High	Peak Found	High	0.06	0.0002	0.0006317	1.76	28.11
	TRUE	High	[K].LTVSNVLK.[E]	1xLabel:13C(6)15N(2) [K8]	0.00624854	0.000965695	1	1	2	P02786	P02786 [375-382]		0	881.555								4633	Redundant	Heavy	Peak Found	High	High	0.16	0.0008827	0.005183	1.99	28.11
	TRUE	High	[R].LVYLVENPGGYVAYSK.[A]		2.71515e-07	9.84928e-05	1	1	26	P02786	P02786 [209-224]		0	1771.93								4749	Redundant	Light	High	Peak Found	High	-0.1	0.0001206	1.855e-07	4.76	54.73
	TRUE	High	[R].LVYLVENPGGYVAYSK.[A]	1xLabel:13C(6)15N(2) [K16]	1.20012e-07	9.84928e-05	1	1	10	P02786	P02786 [209-224]		0	1779.94	0.855	0.37927	0	107.8	92.2	1.20534e+08	7.91832e+07	4749		Heavy	Peak Found	High	High	0.22	0.0001206	8.111e-08	5.34	54.73
	TRUE	High	[R].LYWDDLK.[R]		0.00278471	0.000632611	1	1	1	P02786	P02786 [122-128]		0	952.477	1.065	0.910824	0	96.8	103.2	10704734	8757268	4802		Light	High	Peak Found	High	-0.08	0.0004992	0.002334	1.97	45.12
	TRUE	High	[R].LYWDDLK.[R]	1xLabel:13C(6)15N(2) [K7]	0.0183463	0.0016188	1	1	1	P02786	P02786 [122-128]		0	960.492								4802	Redundant	Heavy	Peak Found	High	High	0.4	0.001475	0.0142	1.66	45.12
	TRUE	High	[R].LYWDDLKR.[K]	1xLabel:13C(6)15N(2) [K7]; 1xLabel:13C(6)15N(4) [R8]	0.000425364	9.84928e-05	1	1	1	P02786	P02786 [122-129]		1	1126.6								4803	No Quan Values	Heavy	Not Found	High	High	0.16	0.0001206	0.0003319	1.84
	TRUE	High	[R].RLYWDDLKR.[K]		3.81663e-05	9.84928e-05	1	1	3	P02786	P02786 [121-129]		2	1264.68	1.071	0.862366	0	96.6	103.4	23982212	19725684	6197		Light	High	Peak Found	High	0.28	0.0001206	2.827e-05	3.42	28.91
	TRUE	High	[R].RLYWDDLKR.[K]	1xLabel:13C(6)15N(2) [K8]; 2xLabel:13C(6)15N(4) [R1; R9]	0.000245599	9.84928e-05	1	1	3	P02786	P02786 [121-129]		2	1292.71								6197	Redundant	Heavy	Peak Found	High	High	0.05	0.0001206	0.0001897	3.55	28.91
	TRUE	High	[R].SAFSNLFGGEPLSYTR.[F]		1.36092e-06	9.84928e-05	1	1	5	P02786	P02786 [7-22]		0	1745.85	0.808	0.250598	0	110.6	89.4	1.61e+08	9.98485e+07	6254		Light	High	Peak Found	High	-0.03	0.0001206	9.517e-07	5.16	66.87
	TRUE	High	[R].SAFSNLFGGEPLSYTR.[F]	1xLabel:13C(6)15N(4) [R16]	8.64602e-06	9.84928e-05	1	1	3	P02786	P02786 [7-22]		0	1755.86								6254	Redundant	Heavy	Peak Found	High	High	-0.15	0.0001206	6.242e-06	4.9	66.87
	TRUE	High	[K].SGVGTALLLK.[L]		2.77029e-05	9.84928e-05	1	1	2	P02786	P02786 [419-428]		0	958.593	1.013	0.931673	0	99.3	100.7	48786696	37967740	6457		Light	High	Peak Found	High	0.02	0.0001206	2.05e-05	3.25	36.49
	TRUE	High	[K].SGVGTALLLK.[L]	1xLabel:13C(6)15N(2) [K10]	6.38652e-05	9.84928e-05	1	1	1	P02786	P02786 [419-428]		0	966.607								6457	Redundant	Heavy	Peak Found	High	High	-0.27	0.0001206	4.784e-05	3.14	36.49
	TRUE	High	[R].SSGLPNIPVQTISR.[A]		2.26335e-05	9.84928e-05	1	1	3	P02786	P02786 [326-339]		0	1468.81	0.791	0.211889	0	111.7	88.3	254557440	154551600	6746		Light	High	Peak Found	High	0.22	0.0001206	1.663e-05	2.97	44.92
	TRUE	High	[R].SSGLPNIPVQTISR.[A]	1xLabel:13C(6)15N(4) [R14]	3.41421e-05	9.84928e-05	1	1	2	P02786	P02786 [326-339]		0	1478.82								6746	Redundant	Heavy	Peak Found	High	High	0.08	0.0001206	2.533e-05	2.9	44.92
	TRUE	High	[K].TMQNVKHPVTGQFLYQDSNWASK.[V]		2.37727e-09	9.84928e-05	1	1	4	P02786	P02786 [509-531]		1	2679.3	1.123	0.694044	0	94.2	105.8	19567298	16868547	7244		Light	High	Peak Found	High	1.24	0.0001206	1.501e-09	7.27	43.55
	TRUE	High	[K].TMQNVKHPVTGQFLYQDSNWASK.[V]	1xOxidation [M2]	3.03539e-08	9.84928e-05	1	1	5	P02786	P02786 [509-531]		1	2695.29	1.659	0.0255829	0	75.2	124.8	10882184	13867544	7242		Light	High	Peak Found	High	0.18	0.0001206	2.002e-08	4.79	39.47
	TRUE	High	[K].TMQNVKHPVTGQFLYQDSNWASK.[V]	2xLabel:13C(6)15N(2) [K6; K23]	1.36074e-07	9.84928e-05	1	1	4	P02786	P02786 [509-531]		1	2695.33								7244	Redundant	Heavy	Peak Found	High	High	1.48	0.0001206	9.184e-08	6.86	43.55
	TRUE	High	[K].TMQNVKHPVTGQFLYQDSNWASK.[V]	1xOxidation [M2]; 2xLabel:13C(6)15N(2) [K6; K23]	3.98539e-07	9.84928e-05	1	1	3	P02786	P02786 [509-531]		1	2711.32								7242	Redundant	Heavy	Peak Found	High	High	1.51	0.0001206	2.745e-07	5.39	39.47
	TRUE	High	[K].TMQNVKHPVTGQFLYQDSNWASK.[V]	1xDeamidated [Q/N]; 1xOxidation [M2]; 2xLabel:13C(6)15N(2) [K6; K23]	5.11248e-05	9.84928e-05	1	1	2	P02786	P02786 [509-531]		1	2712.31	100	1e-17			200		3.05768e+06	7241		Heavy	Not Found	High	High	4.48	0.0001206	3.821e-05	4.7	39.36
	TRUE	High	[R].VEYHFLSPYVSPK.[E]		3.34741e-07	9.84928e-05	1	1	7	P02786	P02786 [681-693]		0	1565.8	0.858	0.387842	0	107.6	92.4	1.16538e+08	7.68152e+07	7683		Light	High	Peak Found	High	-0.26	0.0001206	2.3e-07	4.02	45.89
	TRUE	High	[R].VEYHFLSPYVSPK.[E]	1xLabel:13C(6)15N(2) [K13]	1.04378e-05	9.84928e-05	1	1	5	P02786	P02786 [681-693]		0	1573.81								7683	Redundant	Heavy	Peak Found	High	High	-0.05	0.0001206	7.558e-06	3.65	45.89
	TRUE	High	[K].VSASPLLYTLIEK.[T]		4.98269e-06	9.84928e-05	1	1	3	P02786	P02786 [496-508]		0	1433.83	0.906	0.542752	0	104.9	95.1	70801888	49279028	8098		Light	High	Peak Found	High	0.26	0.0001206	3.574e-06	3.42	65.42
	TRUE	High	[K].VSASPLLYTLIEK.[T]	1xLabel:13C(6)15N(2) [K13]	1.23426e-06	9.84928e-05	1	1	4	P02786	P02786 [496-508]		0	1441.84								8098	Redundant	Heavy	Peak Found	High	High	0.06	0.0001206	8.666e-07	3.8	65.42
	TRUE	High	[R].YNSQLLSFVR.[D]		1.59722e-05	9.84928e-05	1	1	2	P02786	P02786 [614-623]		0	1226.65	1.036	0.985201	0	98.2	101.8	32692318	26015422	8489		Light	High	Peak Found	High	-0.27	0.0001206	1.169e-05	3.25	52.71
	TRUE	High	[R].YNSQLLSFVR.[D]	1xLabel:13C(6)15N(4) [R10]	8.3152e-05	9.84928e-05	1	1	2	P02786	P02786 [614-623]		0	1236.66								8489	Redundant	Heavy	Peak Found	High	High	0.36	0.0001206	6.276e-05	2.65	52.71
TRUE	High	Master Protein	Q14126	Desmoglein-2 OS=Homo sapiens OX=9606 GN=DSG2 PE=1 SV=2	0	409.155	42	25	114	25	1118	122.2	5.24	421.62	25	Pf00028	1829	ENSG00000046604	DSG2	hsa:1829; Q14126; Q4KKU6	Arrhythmogenic right ventricular cardiomyopathy	RHOG GTPase cycle; RAC2 GTPase cycle; RAC3 GTPase cycle; Formation of the cornified envelope; Apoptotic cleavage of cell adhesion proteins	Arrhythmogenic right ventricular cardiomyopathy	8	0	0.997	0.984762	19.09	101.8	98.2	2.44978e+08	1.81554e+08	High	High	1
	Checked	Confidence	Annotated Sequence	Modifications	Qvality PEP	Qvality q-value	# Protein Groups	# Proteins	# PSMs	Master Protein Accessions	Positions in Master Proteins	Modifications in Master Proteins	# Missed Cleavages	Theo. MH+ [Da]	Abundance Ratio: (Heavy) / (Light)	Abundance Ratio P-Value: (Heavy) / (Light)	Abundance Ratio Variability [%]: (Heavy) / (Light)	Abundances (Grouped): Light	Abundances (Grouped): Heavy	Abundance: F1: Light, Sample	Abundance: F1: Heavy, Sample	Precursor Quan Result ID	Quan Info	Quan Channel	Found in Sample: [S1] F1: Light, Sample	Found in Sample: [S3] F1: Heavy, Sample	Confidence (by Search Engine): Sequest HT	DeltaM [ppm] (by Search Engine): Sequest HT	Percolator q-Value (by Search Engine): Sequest HT	Percolator PEP (by Search Engine): Sequest HT	XCorr (by Search Engine): Sequest HT	Top Apex RT [min]
	TRUE	High	[R].ATQFTGATGAIMTTETTK.[T]		2.3122e-08	9.84928e-05	1	1	2	Q14126	Q14126 [729-746]		0	1829.89								750	Redundant	Light	High	Peak Found	High	-0.38	0.0001206	1.52e-08	5.43	37.28
	TRUE	High	[R].ATQFTGATGAIMTTETTK.[T]	1xLabel:13C(6)15N(2) [K18]	4.01205e-09	9.84928e-05	1	1	2	Q14126	Q14126 [729-746]		0	1837.91	1.127	0.685287	0	94	106	14486339	12542065	750		Heavy	Peak Found	High	High	-0.93	0.0001206	2.554e-09	6.12	37.28
	TRUE	High	[R].ATQFTGATGAIMTTETTK.[T]	1xOxidation [M12]	1.21699e-07	9.84928e-05	1	1	1	Q14126	Q14126 [729-746]		0	1845.89								748	Redundant	Light	High	Peak Found	High	-0.47	0.0001206	8.179e-08	5.27	29.22
	TRUE	High	[R].ATQFTGATGAIMTTETTK.[T]	1xOxidation [M12]; 1xLabel:13C(6)15N(2) [K18]	5.45392e-09	9.84928e-05	1	1	2	Q14126	Q14126 [729-746]		0	1853.9	1.149	0.635808	0	93.1	106.9	6757243	5.96034e+06	748		Heavy	Peak Found	High	High	0.71	0.0001206	3.494e-09	6.15	29.22
	TRUE	High	[R].AWITAPVALR.[E]		0.000696024	0.00021741	1	1	2	Q14126	Q14126 [50-59]		0	1097.65								831	Redundant	Light	High	Peak Found	High	0.18	0.0002	0.0005565	2.46	52.12
	TRUE	High	[R].AWITAPVALR.[E]	1xLabel:13C(6)15N(4) [R10]	0.00253753	0.000534724	1	1	1	Q14126	Q14126 [50-59]		0	1107.65	1.033	0.995735	0	98.4	101.6	16943100	13444777	831		Heavy	Peak Found	High	High	0.76	0.0004281	0.002112	2.52	52.12
	TRUE	High	[R].DMAGAQAAAVALNEEFLR.[N]	1xLabel:13C(6)15N(4) [R18]	6.86727e-08	9.84928e-05	1	1	1	Q14126	Q14126 [756-773]		0	1886.93	1.024	0.938205	0	98.8	101.2	2.79479e+06	2.19881e+06	1194		Heavy	Peak Found	High	High	-0.61	0.0001206	4.578e-08	4.81	70.97
	TRUE	High	[R].DMAGAQAAAVALNEEFLR.[N]	1xOxidation [M2]	7.15977e-09	9.84928e-05	1	1	1	Q14126	Q14126 [756-773]		0	1892.92	1.258	0.360365	0	88.6	111.4	7374476	7.12584e+06	1193		Light	High	Peak Found	High	-0.18	0.0001206	4.616e-09	5.2	62.85
	TRUE	High	[R].DMAGAQAAAVALNEEFLR.[N]	1xOxidation [M2]; 1xLabel:13C(6)15N(4) [R18]	1.71255e-09	9.84928e-05	1	1	2	Q14126	Q14126 [756-773]		0	1902.93								1193	Redundant	Heavy	Peak Found	High	High	1.13	0.0001206	1.077e-09	5.45	62.85
	TRUE	High	[R].DNWISVDSVTSEIK.[L]		1.25161e-06	9.84928e-05	1	1	1	Q14126	Q14126 [435-448]		0	1592.78	1.189	0.530194	0	91.4	108.6	9319843	8511088	1239		Light	High	Peak Found	High	-0.19	0.0001206	8.78e-07	3.75	60.34
	TRUE	High	[R].DNWISVDSVTSEIK.[L]	1xLabel:13C(6)15N(2) [K14]	4.45639e-06	9.84928e-05	1	1	1	Q14126	Q14126 [435-448]		0	1600.79								1239	Redundant	Heavy	Peak Found	High	High	0.63	0.0001206	3.183e-06	3.48	60.34
	TRUE	High	[K].DTGEIYTTSVTLDR.[E]		8.52624e-06	9.84928e-05	1	1	1	Q14126	Q14126 [216-229]		0	1570.76	1.163	0.585262	0	92.5	107.5	12506630	11173277	1336		Light	High	Peak Found	High	-0.51	0.0001206	6.183e-06	3.84	42.12
	TRUE	High	[K].DTGEIYTTSVTLDR.[E]	1xLabel:13C(6)15N(4) [R14]	8.1199e-06	9.84928e-05	1	1	2	Q14126	Q14126 [216-229]		0	1580.77								1336	Redundant	Heavy	Peak Found	High	High	-0.02	0.0001206	5.864e-06	3.86	42.12
	TRUE	High	[R].EEHSSYTLTVEAR.[D]		0.000773593	0.00021741	1	1	1	Q14126	Q14126 [230-242]		0	1521.72	1.184	0.56603	0	91.6	108.4	3756037	3.41547e+06	1598		Light	High	Peak Found	High	-0.42	0.0002	0.000618	3.08	21.84
	TRUE	High	[R].EEHSSYTLTVEAR.[D]	1xLabel:13C(6)15N(4) [R13]	0.00050615	0.00021741	1	1	1	Q14126	Q14126 [230-242]		0	1531.73								1598	Redundant	Heavy	Peak Found	High	High	0.49	0.0002	0.0003991	2.83
	TRUE	High	[R].EETPFFLLTGYALDAR.[G]		2.28077e-06	9.84928e-05	1	1	4	Q14126	Q14126 [120-135]		0	1842.93	1.017	0.99415	0	99.1	100.9	1.96176e+06	1.53262e+06	1654		Light	High	Peak Found	High	0.62	0.0001206	1.608e-06	4.29	83.55
	TRUE	High	[R].EETPFFLLTGYALDAR.[G]	1xLabel:13C(6)15N(4) [R16]	9.80257e-08	9.84928e-05	1	1	2	Q14126	Q14126 [120-135]		0	1852.94								1654	Redundant	Heavy	Peak Found	High	High	0.39	0.0001206	6.576e-08	5.13	83.55
	TRUE	High	[R].ESFLAPSSGVQPTLAMPNIAVGQNVTVTER.[V]		8.2006e-05	9.84928e-05	1	1	1	Q14126	Q14126 [1020-1049]		0	3113.59								2015	No Quan Values	Light	High	Not Found	High	0.17	0.0001206	6.158e-05	4.5
	TRUE	High	[K].GFTPIPGTIEMLHPWNNEGAPPEDK.[V]		0.00768853	0.000965695	1	1	2	Q14126	Q14126 [643-667]		0	2747.31	0.646	0.0558346	0	121.5	78.5	8.03037e+06	3.98626e+06	2532		Light	High	Peak Found	High	-0.25	0.0008827	0.006294	2.98	65.94
	TRUE	High	[K].GFTPIPGTIEMLHPWNNEGAPPEDK.[V]	1xOxidation [M11]; 1xLabel:13C(6)15N(2) [K25]	0.0750892	0.00561053	1	1	1	Q14126	Q14126 [643-667]		0	2771.32	0.529	0.00741391	0	130.8	69.2	5.7346e+06	2328120	2533		Heavy	Peak Found	High	High	-0.67	0.004334	0.05495	2.44	59.37
	TRUE	High	[K].GFTPIPGTIEMLHPWNNEGAPPEDKVVPSFLPVDQGGSLVGR.[N]	1xDeamidated [Q35]; 1xOxidation [M11]	0.0134169	0.00137984	1	1	1	Q14126	Q14126 [643-684]		1	4472.22								2535	No Quan Values	Light	High	Not Found	High	4.15	0.001311	0.0106	3.53
	TRUE	High	[K].GITEPPFGIFVFNK.[D]		0.000128644	9.84928e-05	1	1	1	Q14126	Q14126 [93-106]		0	1565.84	0.888	0.578169	0	106	94	3.25321e+06	2.2177e+06	2703		Light	High	Peak Found	High	-0.01	0.0001206	9.748e-05	3.37	75.59
	TRUE	High	[K].GITEPPFGIFVFNK.[D]	1xLabel:13C(6)15N(2) [K14]	0.00027961	9.84928e-05	1	1	1	Q14126	Q14126 [93-106]		0	1573.85								2703	Redundant	Heavy	Peak Found	High	High	0.04	0.0001206	0.0002161	2.72	75.59
	TRUE	High	[K].GQIIGNFQAFDEDTGLPAHAR.[Y]		1.49015e-06	9.84928e-05	1	1	3	Q14126	Q14126 [407-427]		0	2257.1	1.066	0.880465	0	96.8	103.2	19055150	15596378	2794		Light	High	Peak Found	High	-0.46	0.0001206	1.05e-06	2.98	54.64
	TRUE	High	[K].GQIIGNFQAFDEDTGLPAHAR.[Y]	1xLabel:13C(6)15N(4) [R21]	2.17065e-05	9.84928e-05	1	1	2	Q14126	Q14126 [407-427]		0	2267.11								2794	Redundant	Heavy	Peak Found	High	High	-0.05	0.0001206	1.598e-05	2.57	54.64
	TRUE	High	[K].GSSSASIVKGQHEMSEMDGR.[W]	1xLabel:13C(6)15N(2) [K9]; 1xLabel:13C(6)15N(4) [R20]	0.0422125	0.00350894	1	1	1	Q14126	Q14126 [698-717]		1	2110.96	1.373	0.318178	0	84.3	115.7	534875	564101	2843		Heavy	Peak Found	High	High	-0.88	0.002827	0.03117	2.32	19.62
	TRUE	High	[K].LAKLPDFESR.[Y]		0.000416881	9.84928e-05	1	1	1	Q14126	Q14126 [449-458]		1	1175.64	1.144	0.710648	0	93.3	106.7	2452641	2155580	3318		Light	High	Peak Found	High	0.21	0.0001206	0.0003267	2.99	30.35
	TRUE	High	[K].LAKLPDFESR.[Y]	1xLabel:13C(6)15N(2) [K3]; 1xLabel:13C(6)15N(4) [R10]	0.00169863	0.000424254	1	1	1	Q14126	Q14126 [449-458]		1	1193.66								3318	Redundant	Heavy	Peak Found	High	High	0.48	0.0003475	0.001405	2.8	30.35
	TRUE	High	[R].ILDVNDNIPVVENK.[V]		6.63269e-06	9.84928e-05	1	1	1	Q14126	Q14126 [262-275]		0	1581.85								3932	Redundant	Light	High	Peak Found	High	-0.02	0.0001206	4.768e-06	4.57	45.56
	TRUE	High	[R].ILDVNDNIPVVENK.[V]	1xLabel:13C(6)15N(2) [K14]	7.06249e-06	9.84928e-05	1	1	1	Q14126	Q14126 [262-275]		0	1589.86	0.927	0.613442	0	103.8	96.2	29362426	20893300	3932		Heavy	Peak Found	High	High	0.04	0.0001206	5.087e-06	4.56	45.56
	TRUE	High	[R].IVSLEPAYPPVFYLNK.[D]		5.93215e-06	9.84928e-05	1	1	2	Q14126	Q14126 [200-215]		0	1850.01	0.945	0.642142	0	102.8	97.2	10871420	7.88933e+06	4730		Light	High	Peak Found	High	-0.07	0.0001206	4.251e-06	3.02	70.63
	TRUE	High	[R].IVSLEPAYPPVFYLNK.[D]	1xLabel:13C(6)15N(2) [K16]	3.39051e-05	9.84928e-05	1	1	2	Q14126	Q14126 [200-215]		0	1858.02								4730	Redundant	Heavy	Peak Found	High	High	-0.22	0.0001206	2.505e-05	3.1	70.63
	TRUE	High	[R].NTTVSGAGVPGPLPDFGLEESGHSNSTITTSSTR.[V]		0.000509536	0.00021741	1	1	2	Q14126	Q14126 [1073-1106]		0	3373.61	0.554	0.0473294	0	128.7	71.3	2.48421e+06	1.05636e+06	5766		Light	High	Peak Found	High	1.21	0.0002	0.0004002	2.99	54.13
	TRUE	High	[R].NTTVSGAGVPGPLPDFGLEESGHSNSTITTSSTR.[V]	1xDeamidated [N25]; 1xLabel:13C(6)15N(4) [R34]	0.00180171	0.000424254	1	1	1	Q14126	Q14126 [1073-1106]		0	3384.61	0.898	0.572841	0	105.4	94.6	4.23704e+06	2.9205e+06	5764		Heavy	Peak Found	High	High	3.88	0.0003475	0.001491	3.12	54.28
	TRUE	High	[R].NVIATETSYVTGSTMPPTTVILGPSQPQSLIVTER.[V]		0.000264764	9.84928e-05	1	1	1	Q14126	Q14126 [932-966]		0	3687.91								5784	No Quan Values	Light	High	Not Found	High	-2.8	0.0001206	0.0002043	5.14
	TRUE	High	[R].NVIATETSYVTGSTMPPTTVILGPSQPQSLIVTER.[V]	1xOxidation [M15]	0.000626086	0.00021741	1	1	1	Q14126	Q14126 [932-966]		0	3703.91	0.01	1e-17		200		913693		5781		Light	High	Not Found	High	-1.02	0.0002	0.0004978	4.01	69.92
	TRUE	High	[R].NVIATETSYVTGSTMPPTTVILGPSQPQSLIVTER.[V]	1xDeamidated [Q26]; 1xOxidation [M15]; 1xLabel:13C(6)15N(4) [R35]	7.08803e-05	9.84928e-05	1	1	1	Q14126	Q14126 [932-966]		0	3714.9								5779	No Quan Values	Heavy	Not Found	High	High	3.1	0.0001206	5.309e-05	6.42
	TRUE	High	[R].QESTSVLLQQSEK.[K]		0.000220118	9.84928e-05	1	1	1	Q14126	Q14126 [549-561]		0	1476.75	1.083	0.860992	0	96	104	10034175	8.34755e+06	5903		Light	High	Peak Found	High	-2.27	0.0001206	0.0001688	2.98	24.56
	TRUE	High	[R].QESTSVLLQQSEK.[K]	1xLabel:13C(6)15N(2) [K13]	0.00522195	0.000965695	1	1	1	Q14126	Q14126 [549-561]		0	1484.77								5903	Redundant	Heavy	Peak Found	High	High	0.6	0.0008827	0.004349	3.41	24.56
	TRUE	High	[R].VLAPASTLQSSYQIPTENSMTAR.[N]		2.1406e-05	9.84928e-05	1	1	2	Q14126	Q14126 [1050-1072]		0	2465.23								7827	Redundant	Light	High	Peak Found	High	0.91	0.0001206	1.57e-05	4.47	52.52
	TRUE	High	[R].VLAPASTLQSSYQIPTENSMTAR.[N]	1xLabel:13C(6)15N(4) [R23]	6.77311e-07	9.84928e-05	1	1	2	Q14126	Q14126 [1050-1072]		0	2475.24	0.997	0.839421	0	100.1	99.9	10194802	7.80621e+06	7827		Heavy	Peak Found	High	High	0.33	0.0001206	4.684e-07	4.37	52.52
	TRUE	High	[R].VLAPASTLQSSYQIPTENSMTAR.[N]	1xOxidation [M20]	0.000445803	0.00021741	1	1	1	Q14126	Q14126 [1050-1072]		0	2481.23								7829	Redundant	Light	High	Peak Found	High	-0.19	0.0002	0.0003489	2.95	46.94
	TRUE	High	[R].VLAPASTLQSSYQIPTENSMTAR.[N]	1xOxidation [M20]; 1xLabel:13C(6)15N(4) [R23]	9.14223e-06	9.84928e-05	1	1	1	Q14126	Q14126 [1050-1072]		0	2491.24	0.78	0.288906	0	112.4	87.6	3.15817e+06	1.89172e+06	7829		Heavy	Peak Found	High	High	0.32	0.0001206	6.634e-06	4.72	46.94
	TRUE	High	[K].VLEGMVEENQVNVEVTR.[I]		2.97297e-07	9.84928e-05	1	1	1	Q14126	Q14126 [276-292]		0	1944.97								7851	No Quan Values	Light	High	Not Found	High	0.63	0.0001206	2.032e-07	4.72
	TRUE	High	[K].VLEGMVEENQVNVEVTR.[I]	1xOxidation [M5]	5.12353e-07	9.84928e-05	1	1	1	Q14126	Q14126 [276-292]		0	1960.96	0.965	0.843414	0	101.8	98.2	1.90239e+06	1.41028e+06	7853		Light	High	Peak Found	High	3.16	0.0001206	3.546e-07	4.1	36.68
	TRUE	High	[K].VLEGMVEENQVNVEVTR.[I]	1xOxidation [M5]; 1xLabel:13C(6)15N(4) [R17]	9.66672e-08	9.84928e-05	1	1	1	Q14126	Q14126 [276-292]		0	1970.97								7853	Redundant	Heavy	Peak Found	High	High	0.56	0.0001206	6.513e-08	5.09	36.68
	TRUE	High	[R].VIQPHGGGSNPLEGTQHLQDVPYVMVR.[E]		1.08839e-05	9.84928e-05	1	1	2	Q14126	Q14126 [991-1017]		0	2928.48	0.51	0.00295144	0	132.5	67.5	9.17887e+06	3.59259e+06	7939		Light	High	Peak Found	High	-0.71	0.0001206	7.915e-06	3.82	52.65
	TRUE	High	[R].VIQPHGGGSNPLEGTQHLQDVPYVMVR.[E]	1xOxidation [M25]	0.00620323	0.000965695	1	1	2	Q14126	Q14126 [991-1017]		0	2944.47								7941	Redundant	Light	High	Not Found	High	0.21	0.0008827	0.005136	2.13
	TRUE	High	[R].VIQPHGGGSNPLEGTQHLQDVPYVMVR.[E]	1xOxidation [M25]; 1xLabel:13C(6)15N(4) [R27]	0.00117802	0.000339819	1	1	1	Q14126	Q14126 [991-1017]		0	2954.48								7941	No Quan Values	Heavy	Not Found	High	High	0.55	0.0002891	0.0009584	3.3
	TRUE	High	[K].VVPSFLPVDQGGSLVGR.[N]		7.75765e-05	9.84928e-05	1	1	3	Q14126	Q14126 [668-684]		0	1726.95								8201	Redundant	Light	High	Peak Found	High	-0.28	0.0001206	5.826e-05	3.74	60.64
	TRUE	High	[K].VVPSFLPVDQGGSLVGR.[N]	1xLabel:13C(6)15N(4) [R17]	0.000277711	9.84928e-05	1	1	3	Q14126	Q14126 [668-684]		0	1736.96	0.862	0.398681	0	107.4	92.6	3.05569e+07	2.02256e+07	8201		Heavy	Peak Found	High	High	0.81	0.0001206	0.0002146	3.16	60.64
	TRUE	High	[R].VYAPASTLVDQPYANEGTVVVTER.[V]		4.98269e-06	9.84928e-05	1	1	3	Q14126	Q14126 [967-990]		0	2579.3								8233	Redundant	Light	High	Peak Found	High	-0.61	0.0001206	3.58e-06	4.7	54.67
	TRUE	High	[R].VYAPASTLVDQPYANEGTVVVTER.[V]	1xLabel:13C(6)15N(4) [R24]	1.08839e-05	9.84928e-05	1	1	2	Q14126	Q14126 [967-990]		0	2589.31	0.895	0.469253	0	105.5	94.5	11408962	7.84152e+06	8233		Heavy	Peak Found	High	High	-1.18	0.0001206	7.89e-06	4.48	54.67
TRUE	High	Master Protein	P27824	Calnexin OS=Homo sapiens OX=9606 GN=CANX PE=1 SV=2	0	404.383	38	28	227	27	592	67.5	4.6	713.12	28	Pf00262	821	ENSG00000127022; ENSG00000283777	CANX	B2R5V8; B4DGP8; B4E2T8; D3DWQ3; D6R9K3; hsa:821; P27824		MHC class II antigen presentation; Antigen Presentation: Folding, assembly and peptide loading of class I MHC; Maturation of spike protein; Interleukin-35 Signalling; Interleukin-27 signaling; Assembly of Viral Components at the Budding Site; Calnexin/calreticulin cycle; Maturation of spike protein	Protein processing in endoplasmic reticulum; Phagosome; Antigen processing and presentation; Thyroid hormone synthesis; Human T-cell leukemia virus 1 infection	13	1	0.957	0.85597	26.93	104.6	95.4	2.36376e+09	1.65451e+09	High	High	1
	Checked	Confidence	Annotated Sequence	Modifications	Qvality PEP	Qvality q-value	# Protein Groups	# Proteins	# PSMs	Master Protein Accessions	Positions in Master Proteins	Modifications in Master Proteins	# Missed Cleavages	Theo. MH+ [Da]	Abundance Ratio: (Heavy) / (Light)	Abundance Ratio P-Value: (Heavy) / (Light)	Abundance Ratio Variability [%]: (Heavy) / (Light)	Abundances (Grouped): Light	Abundances (Grouped): Heavy	Abundance: F1: Light, Sample	Abundance: F1: Heavy, Sample	Precursor Quan Result ID	Quan Info	Quan Channel	Found in Sample: [S1] F1: Light, Sample	Found in Sample: [S3] F1: Heavy, Sample	Confidence (by Search Engine): Sequest HT	DeltaM [ppm] (by Search Engine): Sequest HT	Percolator q-Value (by Search Engine): Sequest HT	Percolator PEP (by Search Engine): Sequest HT	XCorr (by Search Engine): Sequest HT	Top Apex RT [min]
	TRUE	High	[K].AKKDDTDDEIAK.[Y]		0.0249959	0.00211525	1	1	1	P27824	P27824 [88-99]		2	1348.66								298	No Quan Values	Light	High	Not Found	High	0.08	0.001829	0.01886	2.48
	TRUE	High	[K].APVPTGEVYFADSFDR.[G]		2.89113e-07	9.84928e-05	1	1	4	P27824	P27824 [62-77]		0	1770.83	0.803	0.240916	0	110.9	89.1	1.43054e+08	8.8269e+07	576		Light	High	Peak Found	High	0.08	0.0001206	1.971e-07	4.56	56.77
	TRUE	High	[K].APVPTGEVYFADSFDR.[G]	1xLabel:13C(6)15N(4) [R16]	1.20869e-06	9.84928e-05	1	1	4	P27824	P27824 [62-77]		0	1780.84								576	Redundant	Heavy	Peak Found	High	High	1	0.0001206	8.436e-07	3.91	56.77
	TRUE	High	[R].EIEDPEDRKPEDWDERPK.[I]		1.35146e-06	9.84928e-05	1	1	5	P27824	P27824 [275-292]		1	2283.05	0.715	0.085525	0	116.6	83.4	3.0533e+08	167635517	1780		Light	High	Peak Found	High	-0.35	0.0001206	9.448e-07	4.52	22.3
	TRUE	High	[R].EIEDPEDRKPEDWDERPK.[I]	2xLabel:13C(6)15N(2) [K9; K18]; 1xLabel:13C(6)15N(4) [R16]	0.0668304	0.00524481	1	1	1	P27824	P27824 [275-292]		1	2309.09									No Quan Values		Not Found	Not Found	High	1.26	0.004017	0.04887	3.1
	TRUE	High	[R].EIEDPEDRKPEDWDERPK.[I]	2xLabel:13C(6)15N(2) [K9; K18]; 2xLabel:13C(6)15N(4) [R8; R16]	3.18813e-06	9.84928e-05	1	1	3	P27824	P27824 [275-292]		1	2319.1								1780	Redundant	Heavy	Peak Found	High	High	0.42	0.0001206	2.274e-06	4.39	22.3
	TRUE	High	[K].ESKLPGDKGLVLMSR.[A]		0.00299667	0.000632611	1	1	1	P27824	P27824 [111-125]		2	1629.9	1.05	0.936468	0	97.6	102.4	37372724	30130895	2023		Light	High	Peak Found	High	0.38	0.0004992	0.002497	2.43	31.17
	TRUE	High	[K].ESKLPGDKGLVLMSR.[A]	1xOxidation [M13]	0.0224175	0.00204583	1	1	1	P27824	P27824 [111-125]		2	1645.89	1.15	0.612554	0	93	107	31575644	27885872	2024		Light	High	Peak Found	High	-0.09	0.001781	0.01707	2.41	22.57
	TRUE	High	[K].ESKLPGDKGLVLMSR.[A]	2xLabel:13C(6)15N(2) [K3; K8]; 1xLabel:13C(6)15N(4) [R15]	0.0181943	0.00153507	1	1	3	P27824	P27824 [111-125]		2	1655.94								2023	Redundant	Heavy	Peak Found	High	High	0.39	0.001416	0.01411	1.5	31.17
	TRUE	High	[K].GKWKPPMIDNPSYQGIWKPR.[K]		4.1558e-07	9.84928e-05	1	1	2	P27824	P27824 [381-400]		1	2398.25	0.957	0.706903	0	102.2	97.8	9935423	7298807	2623		Light	High	Peak Found	High	0.07	0.0001206	2.853e-07	4.73	53.34
	TRUE	High	[K].GKWKPPMIDNPSYQGIWKPR.[K]	1xOxidation [M7]	1.54285e-07	9.84928e-05	1	1	3	P27824	P27824 [381-400]		1	2414.24	0.709	0.0860763	0	117	83	1.02558e+07	5587598	2625		Light	High	Peak Found	High	-0.22	0.0001206	1.046e-07	4.22	49.64
	TRUE	High	[K].GKWKPPMIDNPSYQGIWKPR.[K]	3xLabel:13C(6)15N(2) [K2; K4; K18]; 1xLabel:13C(6)15N(4) [R20]	1.85e-06	9.84928e-05	1	1	1	P27824	P27824 [381-400]		1	2432.3								2623	Redundant	Heavy	Peak Found	High	High	0.45	0.0001206	1.302e-06	3.48	53.34
	TRUE	High	[R].GTLSGWILSK.[A]		0.000238971	9.84928e-05	1	1	4	P27824	P27824 [78-87]		0	1061.6	1.175	0.544522	0	92	108	1.96294e+08	177080848	2882		Light	High	Peak Found	High	0.18	0.0001206	0.0001843	3.45	51.6
	TRUE	High	[R].GTLSGWILSK.[A]	1xLabel:13C(6)15N(2) [K10]	6.65843e-05	9.84928e-05	1	1	7	P27824	P27824 [78-87]		0	1069.61								2882	Redundant	Heavy	Peak Found	High	High	-0.54	0.0001206	5.001e-05	3.58	51.6
	TRUE	High	[R].KIPNPDFFEDLEPFR.[M]		3.01428e-08	9.84928e-05	1	1	29	P27824	P27824 [401-415]		1	1863.93	0.773	0.175305	0	112.8	87.2	1.0622e+08	6.30339e+07	3177		Light	High	Peak Found	High	0.67	0.0001206	1.99e-08	4.49	70.68
	TRUE	High	[R].KIPNPDFFEDLEPFR.[M]	1xLabel:13C(6)15N(2) [K1]; 1xLabel:13C(6)15N(4) [R15]	1.99671e-09	9.84928e-05	1	1	15	P27824	P27824 [401-415]		1	1881.95								3177	Redundant	Heavy	Peak Found	High	High	0.23	0.0001206	1.259e-09	5.48	70.68
	TRUE	High	[R].KPEDWDERPK.[I]		0.00473213	0.00081157	1	1	1	P27824	P27824 [283-292]		0	1299.63	0.608	0.113043	0	124.3	75.7	132020	61685.7	3204		Light	High	Peak Found	High	-0.28	0.0007817	0.003938	2.26	12.6
	TRUE	High	[K].KTDAPQPDVKEEEEEK.[E]		0.00643367	0.000965695	1	1	1	P27824	P27824 [516-531]		2	1871.89	0.492	0.0262735	0	134.1	65.9	67756.4	25599.5	3231		Light	High	Peak Found	High	-1.28	0.0008827	0.005314	4.48	12.43
	TRUE	High	[K].LHFIFR.[H]		0.0543347	0.00403872	2	2	1	O14967; P27824	O14967 [191-196]; P27824 [200-205]		0	832.483								3809	Redundant	Light	High	Peak Found	High	-0.3	0.003203	0.03977	1.8	36.99
	TRUE	High	[K].LHFIFR.[H]	1xLabel:13C(6)15N(4) [R6]	0.0295496	0.00254153	2	2	3	O14967; P27824	O14967 [191-196]; P27824 [200-205]		0	842.491	1.13	0.671215	0	93.9	106.1	17974278	15598518	3809	Shared	Heavy	Peak Found	High	High	-0.11	0.002134	0.02206	1.62	36.99
	TRUE	High	[K].LLSKTPELNLDQFHDKTPYTIMFGPDK.[C]		0.00115511	0.000339819	1	1	1	P27824	P27824 [167-193]		2	3148.6	1.082	0.852092	0	96.1	103.9	1.53127e+06	1.27189e+06	4105		Light	High	Peak Found	High	0.11	0.0002891	0.0009403	3.03	64.97
	TRUE	High	[K].IPDPEAVKPDDWDEDAPAK.[I]		2.6589e-07	9.84928e-05	1	1	5	P27824	P27824 [293-311]		0	2107.98	0.66	0.0364767	0	120.5	79.5	5.88188e+07	2.98268e+07	4262		Light	High	Peak Found	High	-0.22	0.0001206	1.819e-07	4.73	40.41
	TRUE	High	[K].IPDPEAVKPDDWDEDAPAK.[I]	2xLabel:13C(6)15N(2) [K8; K19]	7.26261e-07	9.84928e-05	1	1	3	P27824	P27824 [293-311]		0	2124.01								4262	Redundant	Heavy	Peak Found	High	High	-0.25	0.0001206	5.053e-07	3.57	40.41
	TRUE	High	[K].LPGDKGLVLMSR.[A]		1.59722e-05	9.84928e-05	1	1	3	P27824	P27824 [114-125]		1	1285.73	1.064	0.887356	0	96.9	103.1	132434372	108193846	4272		Light	High	Peak Found	High	-0.28	0.0001206	1.166e-05	3.04	35.97
	TRUE	High	[K].LPGDKGLVLMSR.[A]	1xOxidation [M10]	0.000345146	9.84928e-05	1	1	8	P27824	P27824 [114-125]		1	1301.72	1.029	0.988891	0	98.6	101.4	9.94549e+07	7.85959e+07	4273		Light	High	Peak Found	High	-0.5	0.0001206	0.0002684	2.37	25.97
	TRUE	High	[K].LPGDKGLVLMSR.[A]	1xLabel:13C(6)15N(2) [K5]; 1xLabel:13C(6)15N(4) [R12]	3.3204e-05	9.84928e-05	1	1	5	P27824	P27824 [114-125]		1	1303.75								4272	Redundant	Heavy	Peak Found	High	High	-0.1	0.0001206	2.455e-05	2.86	35.97
	TRUE	High	[K].LPGDKGLVLMSR.[A]	1xOxidation [M10]; 1xLabel:13C(6)15N(2) [K5]; 1xLabel:13C(6)15N(4) [R12]	0.000145675	9.84928e-05	1	1	4	P27824	P27824 [114-125]		1	1319.75								4273	Redundant	Heavy	Peak Found	High	High	0.44	0.0001206	0.000111	2.36	25.97
	TRUE	High	[K].IPNPDFFEDLEPFR.[M]		0.000131339	9.84928e-05	1	1	2	P27824	P27824 [402-415]		0	1735.83	0.725	0.24779	0	115.9	84.1	2.52248e+06	1.40486e+06	4296		Light	High	Peak Found	High	0.1	0.0001206	9.947e-05	3.22	77.6
	TRUE	High	[K].IPNPDFFEDLEPFR.[M]	1xLabel:13C(6)15N(4) [R14]	3.58478e-05	9.84928e-05	1	1	1	P27824	P27824 [402-415]		0	1745.84								4296	Redundant	Heavy	Peak Found	High	High	2.01	0.0001206	2.658e-05	2.83	77.6
	TRUE	High	[R].IVDDWANDGWGLK.[K]		1.65389e-05	9.84928e-05	1	1	1	P27824	P27824 [446-458]		0	1488.71								4651	Redundant	Light	High	Peak Found	High	0	0.0001206	1.21e-05	3.35	58.01
	TRUE	High	[R].IVDDWANDGWGLK.[K]	1xLabel:13C(6)15N(2) [K13]	1.04378e-05	9.84928e-05	1	1	2	P27824	P27824 [446-458]		0	1496.73	1.026	0.978463	0	98.7	101.3	33838920	26667226	4651		Heavy	Peak Found	High	High	0.55	0.0001206	7.565e-06	3.81	58.01
	TRUE	High	[R].IVDDWANDGWGLKK.[A]		4.27369e-06	9.84928e-05	1	1	5	P27824	P27824 [446-459]		1	1616.81	1.144	0.629402	0	93.3	106.7	3.31423e+08	291206679	4652		Light	High	Peak Found	High	0.24	0.0001206	3.061e-06	3.76	46.46
	TRUE	High	[R].IVDDWANDGWGLKK.[A]	2xLabel:13C(6)15N(2) [K13; K14]	0.000177904	9.84928e-05	1	1	5	P27824	P27824 [446-459]		1	1632.84								4652	Redundant	Heavy	Peak Found	High	High	-0.18	0.0001206	0.0001359	3.16	46.46
	TRUE	High	[R].RIVDDWANDGWGLKK.[A]		4.36408e-06	9.84928e-05	1	1	3	P27824	P27824 [445-459]		2	1772.91	1.222	0.428143	0	90	110	23829788	22370250	6196		Light	High	Peak Found	High	-0.04	0.0001206	3.116e-06	4.57	45.58
	TRUE	High	[R].RIVDDWANDGWGLKK.[A]	2xLabel:13C(6)15N(2) [K14; K15]; 1xLabel:13C(6)15N(4) [R1]	1.86201e-05	9.84928e-05	1	1	2	P27824	P27824 [445-459]		2	1798.94								6196	Redundant	Heavy	Peak Found	High	High	0.08	0.0001206	1.364e-05	4.27	45.58
	TRUE	High	[K].RPDADLKTYFTDKK.[T]		0.0310674	0.00261618	1	1	1	P27824	P27824 [221-234]		2	1697.89	1.1	0.781242	0	95.3	104.7	11802863	9966334	6200		Light	High	Peak Found	High	0.54	0.002185	0.02326	2.21	24.51
	TRUE	High	[K].RPDADLKTYFTDKK.[T]	3xLabel:13C(6)15N(2) [K7; K13; K14]; 1xLabel:13C(6)15N(4) [R1]	0.00061376	0.00021741	1	1	1	P27824	P27824 [221-234]		2	1731.94								6200	Redundant	Heavy	Peak Found	High	High	0.41	0.0002	0.0004858	2.85	24.51
	TRUE	High	[K].TDAPQPDVK.[E]		0.0183463	0.0016188	1	1	1	P27824	P27824 [517-525]		0	970.484	0.818	0.508714	0	110	90	116388	73090.9	6979		Light	High	Peak Found	High	-0.13	0.001475	0.01422	2.23	12.73
	TRUE	High	[K].TGIYEEK.[H]	1xLabel:13C(6)15N(2) [K7]	0.0106333	0.00112166	1	1	1	P27824	P27824 [211-217]		0	847.429	1.169	0.648213	0	92.2	107.8	190702	171194	7081		Heavy	Peak Found	High	High	0.37	0.00106	0.008521	1.79	13.33
	TRUE	High	[K].TPELNLDQFHDK.[T]		2.87132e-06	9.84928e-05	1	1	4	P27824	P27824 [171-182]		0	1456.71	0.957	0.723511	0	102.2	97.8	138601616	101864792	7271		Light	High	Peak Found	High	-0.12	0.0001206	2.033e-06	3.89	35.67
	TRUE	High	[K].TPELNLDQFHDK.[T]	1xLabel:13C(6)15N(2) [K12]	4.48666e-08	9.84928e-05	1	1	6	P27824	P27824 [171-182]		0	1464.72								7271	Redundant	Heavy	Peak Found	High	High	-0.14	0.0001206	2.974e-08	4.75	35.67
	TRUE	High	[K].TPELNLDQFHDKTPYTIMFGPDK.[C]		1.85e-06	9.84928e-05	1	1	2	P27824	P27824 [171-193]		1	2707.31	0.77	0.170392	0	113	87	6.52686e+07	38603406	7275		Light	High	Peak Found	High	-0.74	0.0001206	1.301e-06	5.35	64.37
	TRUE	High	[K].TPELNLDQFHDKTPYTIMFGPDK.[C]	1xOxidation [M18]	3.07547e-05	9.84928e-05	1	1	6	P27824	P27824 [171-193]		1	2723.3								7274	Redundant	Light	High	Peak Found	High	0.08	0.0001206	2.272e-05	4.33	58.26
	TRUE	High	[K].TPELNLDQFHDKTPYTIMFGPDK.[C]	2xLabel:13C(6)15N(2) [K12; K23]	8.29224e-07	9.84928e-05	1	1	4	P27824	P27824 [171-193]		1	2723.34								7275	Redundant	Heavy	Peak Found	High	High	-0.31	0.0001206	5.753e-07	5.55	64.42
	TRUE	High	[K].TPELNLDQFHDKTPYTIMFGPDK.[C]	1xOxidation [M18]; 2xLabel:13C(6)15N(2) [K12; K23]	4.67944e-06	9.84928e-05	1	1	3	P27824	P27824 [171-193]		1	2739.33	0.777	0.18365	0	112.6	87.4	5.23151e+07	31216408	7274		Heavy	Peak Found	High	High	-0.02	0.0001206	3.349e-06	4.38	58.26
	TRUE	High	[K].TPYTIMFGPDK.[C]		4.41744e-05	9.84928e-05	1	1	1	P27824	P27824 [183-193]		0	1269.62	0.872	0.429619	0	106.8	93.2	35971036	24086116	7312		Light	High	Peak Found	High	-0.04	0.0001206	3.287e-05	3.87	48.09
	TRUE	High	[K].TPYTIMFGPDK.[C]	1xLabel:13C(6)15N(2) [K11]	6.4759e-05	9.84928e-05	1	1	2	P27824	P27824 [183-193]		0	1277.63								7312	Redundant	Heavy	Peak Found	High	High	-0.26	0.0001206	4.832e-05	3.43	48.09
	TRUE	High	[K].TPYTIMFGPDK.[C]	1xOxidation [M6]	7.23726e-05	9.84928e-05	1	1	1	P27824	P27824 [183-193]		0	1285.61								7313	Redundant	Light	High	Peak Found	High	-0.1	0.0001206	5.425e-05	3.16	40.2
	TRUE	High	[K].TPYTIMFGPDK.[C]	1xOxidation [M6]; 1xLabel:13C(6)15N(2) [K11]	9.88927e-05	9.84928e-05	1	1	1	P27824	P27824 [183-193]		0	1293.63	0.918	0.582195	0	104.3	95.7	30147206	21246500	7313		Heavy	Peak Found	High	High	0.06	0.0001206	7.444e-05	3.37	40.2
	TRUE	High	[K].TYFTDKK.[T]		0.0313277	0.00261618	1	1	1	P27824	P27824 [228-234]		1	902.462	1.285	0.456951	0	87.5	112.5	107668	106232	7488		Light	High	Peak Found	High	-0.56	0.002185	0.02344	2.1	12.44
	TRUE	High	[K].VTYKAPVPTGEVYFADSFDR.[G]		6.27173e-08	9.84928e-05	1	1	5	P27824	P27824 [58-77]		1	2262.11	0.883	0.463497	0	106.2	93.8	70128501	4.75303e+07	8171		Light	High	Peak Found	High	0.15	0.0001206	4.167e-08	6.19	56.71
	TRUE	High	[K].VTYKAPVPTGEVYFADSFDR.[G]	1xLabel:13C(6)15N(2) [K4]; 1xLabel:13C(6)15N(4) [R20]	4.0133e-07	9.84928e-05	1	1	5	P27824	P27824 [58-77]		1	2280.13								8171	Redundant	Heavy	Peak Found	High	High	-0.23	0.0001206	2.758e-07	5.75	56.71
	TRUE	High	[K].WKPPMIDNPSYQGIWKPR.[K]		0.000161552	9.84928e-05	1	1	5	P27824	P27824 [383-400]		0	2213.13								8271	Redundant	Light	High	Peak Found	High	0.37	0.0001206	0.0001234	2.9	56.07
	TRUE	High	[K].WKPPMIDNPSYQGIWKPR.[K]	1xOxidation [M5]	1.0962e-06	9.84928e-05	1	1	7	P27824	P27824 [383-400]		0	2229.13	0.691	0.0600578	0	118.3	81.7	1.7451e+08	9.25758e+07	8272		Light	High	Peak Found	High	0.01	0.0001206	7.658e-07	4.17	52.56
	TRUE	High	[K].WKPPMIDNPSYQGIWKPR.[K]	2xLabel:13C(6)15N(2) [K2; K16]; 1xLabel:13C(6)15N(4) [R18]	0.0001854	9.84928e-05	1	1	4	P27824	P27824 [383-400]		0	2239.17	0.723	0.0961602	0	116	84	1.85269e+08	1.02936e+08	8271		Heavy	Peak Found	High	High	-0.09	0.0001206	0.0001422	3.18	56.07
	TRUE	High	[K].WKPPMIDNPSYQGIWKPR.[K]	1xOxidation [M5]; 2xLabel:13C(6)15N(2) [K2; K16]; 1xLabel:13C(6)15N(4) [R18]	3.18813e-06	9.84928e-05	1	1	5	P27824	P27824 [383-400]		0	2255.16								8272	Redundant	Heavy	Peak Found	High	High	-0.22	0.0001206	2.273e-06	3.24	52.56
	TRUE	High	[K].YDGKWEVEEMK.[E]		0.000112023	9.84928e-05	1	1	3	P27824	P27824 [100-110]		1	1413.64								8337	Redundant	Light	High	Peak Found	High	-0.24	0.0001206	8.481e-05	3.47	29.58
	TRUE	High	[K].YDGKWEVEEMK.[E]	2xLabel:13C(6)15N(2) [K4; K11]	0.000364332	9.84928e-05	1	1	3	P27824	P27824 [100-110]		1	1429.66	1.157	0.593793	0	92.7	107.3	42800199	38016674	8337		Heavy	Peak Found	High	High	0.02	0.0001206	0.0002831	3.45	29.58
	TRUE	High	[K].YDGKWEVEEMKESK.[L]		0.00338152	0.00071665	1	1	1	P27824	P27824 [100-113]		2	1757.81	1.263	0.42372	0	88.4	111.6	4.09395e+06	3.96958e+06	8338		Light	High	Peak Found	High	0.35	0.0006511	0.00284	3.47	23.78
TRUE	High	Master Protein	Q9Y490	Talin-1 OS=Homo sapiens OX=9606 GN=TLN1 PE=1 SV=3	0	364.172	22	32	95	32	2541	269.6	6.07	353.78	32	Pf00373, Pf01608, Pf08913, Pf09141, Pf16511	7094	ENSG00000137076	TLN1	A6NMY0; hsa:7094; Q86YD0; Q9NZQ2; Q9UHH8; Q9UPX3; Q9Y490	Integrin-mediated cell adhesion; Primary focal segmental glomerulosclerosis (FSGS); Focal adhesion	Smooth Muscle Contraction; Platelet degranulation ; Signaling by BRAF and RAF1 fusions; Signaling by moderate kinase activity BRAF mutants; Paradoxical activation of RAF signaling by kinase inactive BRAF; Signaling downstream of RAS mutants; SEMA3A-Plexin repulsion signaling by inhibiting Integrin adhesion; Signaling by RAF1 mutants; MAP2K and MAPK activation; Signaling by high-kinase activity BR…	Rap1 signaling pathway; Focal adhesion; Platelet activation; Shigellosis; Human T-cell leukemia virus 1 infection	22	0	1.044	0.870949	14.88	94.9	105.1	9.02409e+07	7.67835e+07	High	High	1
	Checked	Confidence	Annotated Sequence	Modifications	Qvality PEP	Qvality q-value	# Protein Groups	# Proteins	# PSMs	Master Protein Accessions	Positions in Master Proteins	Modifications in Master Proteins	# Missed Cleavages	Theo. MH+ [Da]	Abundance Ratio: (Heavy) / (Light)	Abundance Ratio P-Value: (Heavy) / (Light)	Abundance Ratio Variability [%]: (Heavy) / (Light)	Abundances (Grouped): Light	Abundances (Grouped): Heavy	Abundance: F1: Light, Sample	Abundance: F1: Heavy, Sample	Precursor Quan Result ID	Quan Info	Quan Channel	Found in Sample: [S1] F1: Light, Sample	Found in Sample: [S3] F1: Heavy, Sample	Confidence (by Search Engine): Sequest HT	DeltaM [ppm] (by Search Engine): Sequest HT	Percolator q-Value (by Search Engine): Sequest HT	Percolator PEP (by Search Engine): Sequest HT	XCorr (by Search Engine): Sequest HT	Top Apex RT [min]
	TRUE	High	[K].AAAFEEQENETVVVK.[E]		7.57276e-06	9.84928e-05	1	1	1	Q9Y490	Q9Y490 [2477-2491]		0	1663.82	0.954	0.768793	0	102.4	97.6	2382769	1.74534e+06	7		Light	High	Peak Found	High	0.19	0.0001206	5.457e-06	3.88	30.97
	TRUE	High	[K].AGFLDLKDFLPK.[E]		0.00354534	0.00071665	1	1	1	Q9Y490	Q9Y490 [257-268]		1	1363.76	1.151	0.643703	0	93	107	470207	415566	252		Light	High	Peak Found	High	0.25	0.0006511	0.002971	1.9	71.26
	TRUE	High	[K].AGFLDLKDFLPK.[E]	2xLabel:13C(6)15N(2) [K7; K12]	0.00119354	0.000339819	1	1	1	Q9Y490	Q9Y490 [257-268]		1	1379.79								252	Redundant	Heavy	Peak Found	High	High	0.07	0.0002891	0.0009722	2.29	71.26
	TRUE	High	[K].ALGDLISATK.[A]	1xLabel:13C(6)15N(2) [K10]	0.00384674	0.00071665	1	1	1	Q9Y490	Q9Y490 [2090-2099]		0	996.582	1.318	0.389304	0	86.3	113.7	2971509	3.00664e+06	367		Heavy	Peak Found	High	High	-0.55	0.0007168	0.003224	2.07	36.96
	TRUE	High	[K].ALSTDPAAPNLK.[S]		0.00117802	0.000339819	1	1	1	Q9Y490	Q9Y490 [1321-1332]		0	1197.65	0.653	0.0949719	0	121	79	3544237	1.77616e+06	444		Light	High	Peak Found	High	0.73	0.0002891	0.0009576	2.29	23.96
	TRUE	High	[K].AVAEQIPLLVQGVR.[G]		1.08085e-07	9.84928e-05	1	1	2	Q9Y490	Q9Y490 [958-971]		0	1492.88	1.004	0.935665	0	99.8	100.2	6.25803e+06	4.82656e+06	763		Light	High	Peak Found	High	-0.39	0.0001206	7.248e-08	4.49	57.27
	TRUE	High	[K].AVSSAIAQLLGEVAQGNENYAGIAAR.[D]		0.000156079	9.84928e-05	1	1	1	Q9Y490	Q9Y490 [1097-1122]		0	2573.33	1.266	0.480116	0	88.3	111.7	275986	268368	814		Light	High	Peak Found	High	0.01	0.0001206	0.0001185	3.93	83.01
	TRUE	High	[K].AVSSAIAQLLGEVAQGNENYAGIAAR.[D]	1xLabel:13C(6)15N(4) [R26]	6.86813e-06	9.84928e-05	1	1	1	Q9Y490	Q9Y490 [1097-1122]		0	2583.34								814	Redundant	Heavy	Peak Found	High	High	-0.45	0.0001206	4.96e-06	5.07	83.01
	TRUE	High	[R].DLDQASLAAVSQQLAPR.[E]		5.40504e-05	9.84928e-05	1	1	2	Q9Y490	Q9Y490 [1674-1690]		0	1782.93								1091	Redundant	Light	High	Peak Found	High	0.43	0.0001206	4.037e-05	3.81	60.31
	TRUE	High	[R].DLDQASLAAVSQQLAPR.[E]	1xLabel:13C(6)15N(4) [R17]	0.000141708	9.84928e-05	1	1	2	Q9Y490	Q9Y490 [1674-1690]		0	1792.94	0.809	0.317377	0	110.5	89.5	4.59067e+06	2.85344e+06	1091		Heavy	Peak Found	High	High	-0.03	0.0001206	0.0001078	2.91	60.31
	TRUE	High	[K].EADESLNFEEQILEAAK.[S]		2.69414e-05	9.84928e-05	1	1	1	Q9Y490	Q9Y490 [2334-2350]		0	1935.92	1.274	0.44199	0	87.9	112.1	1.90207e+06	1861364	1441		Light	High	Peak Found	High	-0.92	0.0001206	1.989e-05	3.89	67.66
	TRUE	High	[K].EADESLNFEEQILEAAK.[S]	1xLabel:13C(6)15N(2) [K17]	0.000140732	9.84928e-05	1	1	1	Q9Y490	Q9Y490 [2334-2350]		0	1943.93								1441	Redundant	Heavy	Peak Found	High	High	-0.56	0.0001206	0.0001067	3.23	67.66
	TRUE	High	[R].GSQAQPDSPSAQLALIAASQSFLQPGGK.[M]		3.22916e-05	9.84928e-05	1	1	2	Q9Y490	Q9Y490 [972-999]		0	2754.41	0.714	0.171304	0	116.7	83.3	3.37131e+06	1.84769e+06	2830		Light	High	Peak Found	High	0.77	0.0001206	2.385e-05	3.96	74.65
	TRUE	High	[R].GSQAQPDSPSAQLALIAASQSFLQPGGK.[M]	1xLabel:13C(6)15N(2) [K28]	2.71298e-05	9.84928e-05	1	1	2	Q9Y490	Q9Y490 [972-999]		0	2762.42								2830	Redundant	Heavy	Peak Found	High	High	0.29	0.0001206	2.001e-05	4.19	74.65
	TRUE	High	[R].GVAALTSDPAVQAIVLDTASDVLDK.[A]		4.48666e-08	9.84928e-05	1	1	2	Q9Y490	Q9Y490 [1137-1161]		0	2469.31	1.011	0.997859	0	99.5	100.5	315234	244755	2895		Light	High	Peak Found	High	0.64	0.0001206	2.976e-08	5.25	85.6
	TRUE	High	[R].GVAALTSDPAVQAIVLDTASDVLDK.[A]	1xLabel:13C(6)15N(2) [K25]	3.18783e-07	9.84928e-05	1	1	2	Q9Y490	Q9Y490 [1137-1161]		0	2477.32								2895	Redundant	Heavy	Peak Found	High	High	-1.3	0.0001206	2.19e-07	5.36	85.6
	TRUE	High	[K].LAQAAQSSVATITR.[L]		9.66812e-07	9.84928e-05	1	1	1	Q9Y490	Q9Y490 [2044-2057]		0	1416.78	1.166	0.612033	0	92.3	107.7	9190875	8232536	3348		Light	High	Peak Found	High	0.81	0.0001206	6.754e-07	4.48	24.24
	TRUE	High	[K].LAQAAQSSVATITR.[L]	1xLabel:13C(6)15N(4) [R14]	4.7122e-06	9.84928e-05	1	1	1	Q9Y490	Q9Y490 [2044-2057]		0	1426.79								3348	Redundant	Heavy	Peak Found	High	High	-1.57	0.0001206	3.366e-06	3.76	24.24
	TRUE	High	[R].LASEAKPAAVAAENEEIGSHIK.[H]		6.54079e-06	9.84928e-05	1	1	1	Q9Y490	Q9Y490 [1896-1917]		0	2235.16								3369	Redundant	Light	High	Peak Found	High	0.04	0.0001206	4.713e-06	4.08	28.45
	TRUE	High	[R].LASEAKPAAVAAENEEIGSHIK.[H]	2xLabel:13C(6)15N(2) [K6; K22]	1.19169e-05	9.84928e-05	1	1	1	Q9Y490	Q9Y490 [1896-1917]		0	2251.19	1.013	0.989913	0	99.4	100.6	1.46826e+06	1141854	3369		Heavy	Peak Found	High	High	-0.97	0.0001206	8.641e-06	4.32	28.45
	TRUE	High	[K].LGAASLGAEDPETQVVLINAVK.[D]		7.08803e-05	9.84928e-05	1	1	2	Q9Y490	Q9Y490 [2064-2085]		0	2195.19								3645	Redundant	Light	High	Peak Found	High	-0.95	0.0001206	5.326e-05	4.55	61.93
	TRUE	High	[K].LGAASLGAEDPETQVVLINAVK.[D]	1xLabel:13C(6)15N(2) [K22]	2.36001e-05	9.84928e-05	1	1	2	Q9Y490	Q9Y490 [2064-2085]		0	2203.21	1.145	0.711718	0	93.2	106.8	2.05262e+06	1.80496e+06	3645		Heavy	Peak Found	High	High	-0.11	0.0001206	1.741e-05	4.01	61.93
	TRUE	High	[K].LHTDDELNWLDHGR.[T]		0.000848379	0.00021741	1	1	1	Q9Y490	Q9Y490 [165-178]		0	1720.8								3826	No Quan Values	Light	High	Not Found	High	0.84	0.0002	0.0006802	3.03
	TRUE	High	[R].LLSDSLPPSTGTFQEAQSR.[L]		0.0439801	0.00366907	1	1	1	Q9Y490	Q9Y490 [1223-1241]		0	2034.01								4101	No Quan Values	Light	High	Not Found	High	-0.88	0.002942	0.03253	2.48
	TRUE	High	[R].LNEAAAGLNQAATELVQASR.[G]		1.40861e-09	9.84928e-05	1	1	3	Q9Y490	Q9Y490 [1242-1261]		0	2027.05	0.944	0.730227	0	102.9	97.1	4414341	3.20098e+06	4195		Light	High	Peak Found	High	0.28	0.0001206	8.818e-10	5.04	59.6
	TRUE	High	[R].LNEAAAGLNQAATELVQASR.[G]	1xLabel:13C(6)15N(4) [R20]	9.33379e-09	9.84928e-05	1	1	1	Q9Y490	Q9Y490 [1242-1261]		0	2037.06								4195	Redundant	Heavy	Peak Found	High	High	-1.98	0.0001206	6.026e-09	5.31	59.6
	TRUE	High	[R].IPEAPAGPPSDFGLFLSDDDPK.[K]		0.00417662	0.00081157	1	1	1	Q9Y490	Q9Y490 [36-57]		0	2285.1								4265	No Quan Values	Light	High	Not Found	High	2.84	0.0007817	0.003482	3.17
	TRUE	High	[K].NGNLPEFGDAISTASK.[A]	1xLabel:13C(6)15N(2) [K16]	0.00120137	0.000339819	1	1	1	Q9Y490	Q9Y490 [1416-1431]		0	1628.8	1.026	0.998704	0	98.7	101.3	5.64991e+06	4.45267e+06	5550		Heavy	Peak Found	High	High	-0.8	0.0002891	0.0009767	3.02	43.85
	TRUE	High	[K].NLGTALAELR.[T]	1xLabel:13C(6)15N(4) [R10]	0.000467183	0.00021741	1	1	2	Q9Y490	Q9Y490 [1026-1035]		0	1067.61	1.038	0.991309	0	98.1	101.9	3.2746e+06	2611358	5610		Heavy	Peak Found	High	High	0.25	0.0002	0.0003677	2.53	46.13
	TRUE	High	[K].QAAASATQTIAAAQHAASTPK.[A]		1.44866e-05	9.84928e-05	1	1	1	Q9Y490	Q9Y490 [923-943]		0	1995.03	1.085	0.803147	0	95.9	104.1	7.77508e+06	6478642	5828		Light	High	Peak Found	High	0.5	0.0001206	1.055e-05	4.21	27.69
	TRUE	High	[K].QAAASATQTIAAAQHAASTPK.[A]	1xLabel:13C(6)15N(2) [K21]	0.00123322	0.000339819	1	1	1	Q9Y490	Q9Y490 [923-943]		0	2003.04								5828	Redundant	Heavy	Peak Found	High	High	1.94	0.0002891	0.001007	2	27.69
	TRUE	High	[R].QEDVIATANLSR.[KR]	1xLabel:13C(6)15N(4) [R12]	4.57387e-05	9.84928e-05	1	2	1	Q9Y490	Q9Y490 [2198-2209]		0	1326.69	1.507	0.201151	0	79.8	120.2	2531352	2.93046e+06	5876		Heavy	Peak Found	High	High	0.15	0.0001206	3.393e-05	2.82	28.9
	TRUE	High	[R].SGASGPENFQVGSMPPAQQQITSGQMHR.[G]		1.35108e-05	9.84928e-05	1	1	1	Q9Y490	Q9Y490 [455-482]		0	2927.35								6404	No Quan Values	Light	High	Not Found	High	-0.95	0.0001206	9.845e-06	5.41
	TRUE	High	[K].SIAAATSALVK.[SA]		0.0334867	0.00276793	1	2	1	Q9Y490	Q9Y490 [2351-2361]		0	1031.61	1.378	0.3411	0	84.1	115.9	2.59719e+06	2747898	6488		Light	High	Peak Found	High	-0.33	0.002292	0.02496	1.95	29.46
	TRUE	High	[K].SNTSPEELGPLANQLTSDYGR.[L]		1.6424e-05	9.84928e-05	1	1	1	Q9Y490	Q9Y490 [1875-1895]		0	2249.07	0.991	0.853334	0	100.5	99.5	2.76851e+06	2107041	6634		Light	High	Peak Found	High	0.97	0.0001206	1.201e-05	4.09	57.35
	TRUE	High	[K].SNTSPEELGPLANQLTSDYGR.[L]	1xLabel:13C(6)15N(4) [R21]	5.05175e-08	9.84928e-05	1	1	1	Q9Y490	Q9Y490 [1875-1895]		0	2259.08								6634	Redundant	Heavy	Peak Found	High	High	0.66	0.0001206	3.354e-08	4.43	57.35
	TRUE	High	[K].TLAESALQLLYTAK.[E]		1.44913e-06	9.84928e-05	1	1	2	Q9Y490	Q9Y490 [1767-1780]		0	1521.85	1.012	0.893486	0	99.4	100.6	2.82806e+06	2.19785e+06	7125		Light	High	Peak Found	High	0.43	0.0001206	1.021e-06	2.93	72.66
	TRUE	High	[K].TLAESALQLLYTAK.[E]	1xLabel:13C(6)15N(2) [K14]	3.14365e-07	9.84928e-05	1	1	2	Q9Y490	Q9Y490 [1767-1780]		0	1529.87								7125	Redundant	Heavy	Peak Found	High	High	-0.31	0.0001206	2.153e-07	3.58	72.66
	TRUE	High	[K].TMLESAGGLIQTAR.[A]	1xLabel:13C(6)15N(4) [R14]	1.61965e-05	9.84928e-05	1	1	2	Q9Y490	Q9Y490 [1605-1618]		0	1457.77	5.568	2.3208e-08	0	30.5	169.5	680563	2.91006e+06	7239		Heavy	Peak Found	High	High	1.19	0.0001206	1.181e-05	3.3	45.79
	TRUE	High	[K].TMLESAGGLIQTAR.[A]	1xOxidation [M2]; 1xLabel:13C(6)15N(4) [R14]	0.00757371	0.000965695	1	1	1	Q9Y490	Q9Y490 [1605-1618]		0	1473.76	3.081	9.30962e-06	0	49	151	2097504	4962228	7240		Heavy	Peak Found	High	High	-0.83	0.0008827	0.006236	2.37	35.81
	TRUE	High	[R].VAGSVTELIQAAEAMK.[G]	1xLabel:13C(6)15N(2) [K16]	1.34206e-06	9.84928e-05	1	1	1	Q9Y490	Q9Y490 [2276-2291]		0	1625.87	2.785	0.00182194	0	52.8	147.2	459595	982924	7533		Heavy	Peak Found	High	High	1.16	0.0001206	9.404e-07	4.55	71.07
	TRUE	High	[K].VGAIPANALDDGQWSQGLISAAR.[M]		1.00801e-05	9.84928e-05	1	1	2	Q9Y490	Q9Y490 [2376-2398]		0	2310.18								7722	Redundant	Light	High	Peak Found	High	2.02	0.0001206	7.323e-06	4.01	66.02
	TRUE	High	[K].VGAIPANALDDGQWSQGLISAAR.[M]	1xLabel:13C(6)15N(4) [R23]	1.78634e-07	9.84928e-05	1	1	1	Q9Y490	Q9Y490 [2376-2398]		0	2320.19	0.985	0.846161	0	100.8	99.2	4513452	3.41404e+06	7722		Heavy	Peak Found	High	High	-0.6	0.0001206	1.215e-07	3.91	66.02
	TRUE	High	[K].VGDDPAVWQLK.[N]	1xLabel:13C(6)15N(2) [K11]	0.0647608	0.00483692	1	1	1	Q9Y490	Q9Y490 [2105-2115]		0	1235.65	1.636	0.0909969	0	75.9	124.1	2.75098e+06	3.45646e+06	7723		Heavy	Peak Found	High	High	0.17	0.003777	0.04746	2.57	42.53
	TRUE	High	[K].VLGEAMTGISQNAK.[N]		3.05741e-06	9.84928e-05	1	1	1	Q9Y490	Q9Y490 [1402-1415]		0	1418.73	0.941	0.734927	0	103	97	3898619	2818039	7866		Light	High	Peak Found	High	0.23	0.0001206	2.174e-06	3.87	30.88
	TRUE	High	[K].VSQMAQYFEPLTLAAVGAASK.[T]		1.30478e-05	9.84928e-05	1	1	3	Q9Y490	Q9Y490 [1731-1751]		0	2182.12	1.05	0.94502	0	97.5	102.5	1.84431e+06	1.48759e+06	8118		Light	High	Peak Found	High	0.47	0.0001206	9.495e-06	3.87	75.82
	TRUE	High	[K].VSQMAQYFEPLTLAAVGAASK.[T]	1xLabel:13C(6)15N(2) [K21]	6.63269e-06	9.84928e-05	1	1	1	Q9Y490	Q9Y490 [1731-1751]		0	2190.14								8118	Redundant	Heavy	Peak Found	High	High	-0.91	0.0001206	4.782e-06	4.72	75.82
	TRUE	High	[K].VSQMAQYFEPLTLAAVGAASK.[T]	1xOxidation [M4]	8.2577e-05	9.84928e-05	1	1	1	Q9Y490	Q9Y490 [1731-1751]		0	2198.12								8120	No Quan Values	Light	High	Not Found	High	0.8	0.0001206	6.228e-05	3.79
	TRUE	High	[K].VSQMAQYFEPLTLAAVGAASK.[T]	1xOxidation [M4]; 1xLabel:13C(6)15N(2) [K21]	0.000169534	9.84928e-05	1	1	1	Q9Y490	Q9Y490 [1731-1751]		0	2206.13								8120	Redundant	Heavy	Not Found	High	High	-0.54	0.0001206	0.0001297	3.78
TRUE	High	Master Protein	P11142	Heat shock cognate 71 kDa protein OS=Homo sapiens OX=9606 GN=HSPA8 PE=1 SV=1	0	358.514	44	25	139	22	646	70.9	5.52	482.6	25	Pf00012	3312	ENSG00000109971	HSPA8	hsa:3312; P11142; Q9H3R6	Parkin-ubiquitin proteasomal system pathway; MAPK signaling pathway; Exercise-induced circadian regulation	Golgi Associated Vesicle Biogenesis; AUF1 (hnRNP D0) binds and destabilizes mRNA; Neutrophil degranulation; mRNA Splicing - Major Pathway; Protein methylation; Clathrin-mediated endocytosis; Late endosomal microautophagy; Chaperone Mediated Autophagy; HSP90 chaperone cycle for steroid hormone receptors (SHR) in the presence of ligand; Regulation of HSF1-mediated heat shock response; Attenuation p…	Spliceosome; MAPK signaling pathway; Protein processing in endoplasmic reticulum; Endocytosis; Longevity regulating pathway; Antigen processing and presentation; Estrogen signaling pathway; Prion disease; Legionellosis; Toxoplasmosis; Measles; Lipid and atherosclerosis	32	3	1.135	0.624767	13.38	92.7	107.3	604109941	5.36618e+08	High	High	1
	Checked	Confidence	Annotated Sequence	Modifications	Qvality PEP	Qvality q-value	# Protein Groups	# Proteins	# PSMs	Master Protein Accessions	Positions in Master Proteins	Modifications in Master Proteins	# Missed Cleavages	Theo. MH+ [Da]	Abundance Ratio: (Heavy) / (Light)	Abundance Ratio P-Value: (Heavy) / (Light)	Abundance Ratio Variability [%]: (Heavy) / (Light)	Abundances (Grouped): Light	Abundances (Grouped): Heavy	Abundance: F1: Light, Sample	Abundance: F1: Heavy, Sample	Precursor Quan Result ID	Quan Info	Quan Channel	Found in Sample: [S1] F1: Light, Sample	Found in Sample: [S3] F1: Heavy, Sample	Confidence (by Search Engine): Sequest HT	DeltaM [ppm] (by Search Engine): Sequest HT	Percolator q-Value (by Search Engine): Sequest HT	Percolator PEP (by Search Engine): Sequest HT	XCorr (by Search Engine): Sequest HT	Top Apex RT [min]
	TRUE	High	[R].ARFEELNADLFR.[G]		0.00054825	0.00021741	1	2	3	P11142	P11142 [300-311]		1	1480.75	1.363	0.195549	0	84.6	115.4	1.3043e+07	13650919	639		Light	High	Peak Found	High	-0.23	0.0002	0.0004318	4.41	51.05
	TRUE	High	[R].ARFEELNADLFR.[G]	2xLabel:13C(6)15N(4) [R2; R12]	2.49533e-05	9.84928e-05	1	2	3	P11142	P11142 [300-311]		1	1500.77								639	Redundant	Heavy	Peak Found	High	High	0.7	0.0001206	1.833e-05	4.43	51.05
	TRUE	High	[K].DAGTIAGLNVLR.[I]		5.49393e-06	9.84928e-05	1	1	2	P11142	P11142 [160-171]		0	1199.67	1.165	0.570064	0	92.4	107.6	79579096	71209344	869		Light	High	Peak Found	High	0.15	0.0001206	3.934e-06	3.76	50.74
	TRUE	High	[K].DAGTIAGLNVLR.[I]	1xLabel:13C(6)15N(4) [R12]	7.95223e-07	9.84928e-05	1	1	2	P11142	P11142 [160-171]		0	1209.68								869	Redundant	Heavy	Peak Found	High	High	-0.02	0.0001206	5.512e-07	4.2	50.74
	TRUE	High	[K].EIAEAYLGK.[T]	1xLabel:13C(6)15N(2) [K9]	0.0233759	0.00204583	1	1	1	P11142	P11142 [129-137]		0	1001.54	1.262	0.413287	0	88.4	111.6	5602195	5431486	1750		Heavy	Peak Found	High	High	0.13	0.001781	0.01778	1.83	26.94
	TRUE	High	[R].FDDAVVQSDMK.[H]		0.00155008	0.000424254	1	1	1	P11142	P11142 [78-88]		0	1254.57	1.051	0.946035	0	97.5	102.5	3.8556e+06	3.11206e+06	2177		Light	High	Peak Found	High	0.09	0.0003475	0.001272	2.4	28.89
	TRUE	High	[R].FDDAVVQSDMK.[H]	1xLabel:13C(6)15N(2) [K11]	0.000272089	9.84928e-05	1	1	1	P11142	P11142 [78-88]		0	1262.58								2177	Redundant	Heavy	Peak Found	High	High	0.06	0.0001206	0.00021	3.31	28.89
	TRUE	High	[R].FEELNADLFR.[G]		0.000570554	0.00021741	1	2	4	P11142	P11142 [302-311]		0	1253.62	1.172	0.550311	0	92.1	107.9	24995834	22507458	2190		Light	High	Peak Found	High	0.51	0.0002	0.0004509	2.9	55.08
	TRUE	High	[R].FEELNADLFR.[G]	1xLabel:13C(6)15N(4) [R10]	0.00101319	0.00021741	1	2	2	P11142	P11142 [302-311]		0	1263.62								2190	Redundant	Heavy	Peak Found	High	High	0.35	0.0002	0.0008171	3.66	55.08
	TRUE	High	[K].HWPFMVVNDAGRPK.[V]		0.00129943	0.000339819	1	1	1	P11142	P11142 [89-102]		0	1653.83	1.032	0.995285	0	98.4	101.6	4.06073e+06	3.21688e+06	3070		Light	High	Peak Found	High	0.22	0.0002891	0.001061	3.19
	TRUE	High	[K].HWPFMVVNDAGRPK.[V]	1xLabel:13C(6)15N(2) [K14]; 1xLabel:13C(6)15N(4) [R12]	0.00114758	0.000339819	1	1	1	P11142	P11142 [89-102]		0	1671.85								3070	Redundant	Heavy	Peak Found	High	High	0.14	0.0002891	0.0009342	2.53	45.38
	TRUE	High	[K].LDKSQIHDIVLVGGSTR.[I]		0.000519823	0.00021741	1	1	2	P11142	P11142 [326-342]		1	1838.01	1.074	0.877269	0	96.5	103.5	11892137	9.80453e+06	3438		Light	High	Peak Found	High	-0.14	0.0002	0.0004101	3.39	37.28
	TRUE	High	[K].LDKSQIHDIVLVGGSTR.[I]	1xLabel:13C(6)15N(2) [K3]; 1xLabel:13C(6)15N(4) [R17]	1.25131e-05	9.84928e-05	1	1	4	P11142	P11142 [326-342]		1	1856.04								3438	Redundant	Heavy	Peak Found	High	High	0.13	0.0001206	9.133e-06	3.08	37.28
	TRUE	High	[R].IINEPTAAAIAYGLDK.[KRG]		1.26e-08	9.84928e-05	2	4	4	P11142; P11021	P11142 [172-187]; P11021 [198-213]		0	1659.9	1.061	0.934158	0	97	103	9744153	7.93851e+06	4042	Shared	Light	High	Peak Found	High	0.03	0.0001206	8.163e-09	3.88	54.3
	TRUE	High	[R].IINEPTAAAIAYGLDK.[KRG]	1xLabel:13C(6)15N(2) [K16]	0.000238971	9.84928e-05	2	4	1	P11142; P11021	P11142 [172-187]; P11021 [198-213]		0	1667.91								4042	Redundant	Heavy	Peak Found	High	High	-0.65	0.0001206	0.000184	3.61	54.3
	TRUE	High	[R].IINEPTAAAIAYGLDKK.[GV]	2xLabel:13C(6)15N(2) [K16; K17]	0.00303702	0.000632611	1	2	1	P11142	P11142 [172-188]		1	1804.02	1.145	0.625877	0	93.2	106.8	50409656	44339780	4043		Heavy	Peak Found	High	High	-0.63	0.0004992	0.002542	2.66	47.38
	TRUE	High	[K].LLQDFFNGK.[E]		0.00137814	0.000424254	2	3	1	P17066; P11142	P17066 [351-359]; P11142 [349-357]		0	1081.57								4070	Redundant	Light	High	Peak Found	High	-0.1	0.0003475	0.001129	2.47	49.71
	TRUE	High	[K].LLQDFFNGK.[E]	1xLabel:13C(6)15N(2) [K9]	0.000912078	0.00021741	2	3	2	P17066; P11142	P17066 [351-359]; P11142 [349-357]		0	1089.58	1.238	0.395315	0	89.4	110.6	18575858	17654102	4070	Shared	Heavy	Peak Found	High	High	-0.24	0.0002	0.0007368	2.02	49.71
	TRUE	High	[K].LYQSAGGMPGGMPGGFPGGGAPPSGGASSGPTIEEVD.[-]		7.89646e-06	9.84928e-05	1	1	2	P11142	P11142 [610-646]		0	3346.5									Indistinguishable Channels		Not Found	Not Found	High	0.26	0.0001206	5.708e-06	5.45	66.69
	TRUE	High	[K].LYQSAGGMPGGMPGGFPGGGAPPSGGASSGPTIEEVD.[-]	1xOxidation [M]	0.000144673	9.84928e-05	1	1	3	P11142	P11142 [610-646]		0	3362.49									Indistinguishable Channels		Not Found	Not Found	High	0.45	0.0001206	0.0001098	4.86	59.92
	TRUE	High	[K].LYQSAGGMPGGMPGGFPGGGAPPSGGASSGPTIEEVD.[-]	1xDeamidated [Q3]; 1xOxidation [M]	0.000169534	9.84928e-05	1	1	5	P11142	P11142 [610-646]		0	3363.48									Indistinguishable Channels		Not Found	Not Found	High	4.65	0.0001206	0.0001293	4.26	61.13
	TRUE	High	[K].LYQSAGGMPGGMPGGFPGGGAPPSGGASSGPTIEEVD.[-]	2xOxidation [M8; M12]	9.82098e-05	9.84928e-05	1	1	2	P11142	P11142 [610-646]		0	3378.49									No Quan Values		Not Found	Not Found	High	0.66	0.0001206	7.432e-05	4.16
	TRUE	High	[K].MKEIAEAYLGK.[T]		1.15084e-05	9.84928e-05	1	1	4	P11142	P11142 [127-137]		1	1252.66	0.807	0.250136	0	110.7	89.3	1.86677e+07	1.15745e+07	5125		Light	High	Peak Found	High	0.82	0.0001206	8.34e-06	2.99	27.79
	TRUE	High	[K].MKEIAEAYLGK.[T]	2xLabel:13C(6)15N(2) [K2; K11]	2.18583e-05	9.84928e-05	1	1	3	P11142	P11142 [127-137]		1	1268.69								5125	Redundant	Heavy	Peak Found	High	High	-0.18	0.0001206	1.609e-05	3.02	27.79
	TRUE	High	[R].MVNHFIAEFK.[R]		0.00018413	9.84928e-05	1	1	2	P11142	P11142 [237-246]		0	1235.62	1.135	0.667799	0	93.7	106.3	11863102	1.03412e+07	5415		Light	High	Peak Found	High	-0.03	0.0001206	0.0001405	3.28	38.64
	TRUE	High	[R].MVNHFIAEFK.[R]	1xLabel:13C(6)15N(2) [K10]	1.05844e-05	9.84928e-05	1	1	3	P11142	P11142 [237-246]		0	1243.64								5415	Redundant	Heavy	Peak Found	High	High	-0.28	0.0001206	7.688e-06	3.39	38.64
	TRUE	High	[R].MVNHFIAEFK.[R]	1xOxidation [M1]	0.00352142	0.00071665	1	1	2	P11142	P11142 [237-246]		0	1251.62	1.257	0.441959	0	88.6	111.4	4797462	4.63025e+06	5414		Light	High	Peak Found	High	0.31	0.0006511	0.002947	2.56	31.68
	TRUE	High	[K].NQVAMNPTNTVFDAK.[R]		1.38005e-06	9.84928e-05	1	1	2	P11142	P11142 [57-71]		0	1649.8	1.041	0.968139	0	98	102	23017630	18400510	5711		Light	High	Peak Found	High	-0.61	0.0001206	9.663e-07	5.37	37.55
	TRUE	High	[K].NQVAMNPTNTVFDAK.[R]	1xLabel:13C(6)15N(2) [K15]	2.73445e-06	9.84928e-05	1	1	2	P11142	P11142 [57-71]		0	1657.81								5711	Redundant	Heavy	Peak Found	High	High	0.11	0.0001206	1.942e-06	4.63	37.55
	TRUE	High	[K].NQVAMNPTNTVFDAK.[R]	1xOxidation [M5]	6.49532e-06	9.84928e-05	1	1	2	P11142	P11142 [57-71]		0	1665.79	0.905	0.539375	0	105	95	18373698	12774409	5712		Light	High	Peak Found	High	-0.11	0.0001206	4.687e-06	4.4	28.96
	TRUE	High	[K].NQVAMNPTNTVFDAK.[R]	1xOxidation [M5]; 1xLabel:13C(6)15N(2) [K15]	5.64941e-06	9.84928e-05	1	1	2	P11142	P11142 [57-71]		0	1673.8								5712	Redundant	Heavy	Peak Found	High	High	-0.71	0.0001206	4.05e-06	4.59	28.96
	TRUE	High	[K].NQVAMNPTNTVFDAKR.[L]		0.000403102	9.84928e-05	1	1	2	P11142	P11142 [57-72]		1	1805.9								5714	Redundant	Light	High	Peak Found	High	1.18	0.0001206	0.0003159	3.74	30.49
	TRUE	High	[K].NQVAMNPTNTVFDAKR.[L]	1xOxidation [M5]	0.00152996	0.000424254	1	1	1	P11142	P11142 [57-72]		1	1821.89								5716	No Quan Values	Light	High	Not Found	High	1.85	0.0003475	0.00126	2.55
	TRUE	High	[K].NQVAMNPTNTVFDAKR.[L]	1xLabel:13C(6)15N(2) [K15]; 1xLabel:13C(6)15N(4) [R16]	0.000651468	0.00021741	1	1	1	P11142	P11142 [57-72]		1	1823.92	1.141	0.63872	0	93.4	106.6	2.30222e+07	20172142	5714		Heavy	Peak Found	High	High	-0.77	0.0002	0.0005184	3.27	30.45
	TRUE	High	[K].NSLESYAFNMK.[A]		3.71179e-05	9.84928e-05	1	1	2	P11142	P11142 [540-550]		0	1303.6	1.242	0.386742	0	89.2	110.8	30545422	29126104	5727		Light	High	Peak Found	High	0.06	0.0001206	2.748e-05	3.49	44.89
	TRUE	High	[K].NSLESYAFNMK.[A]	1xLabel:13C(6)15N(2) [K11]	5.87541e-05	9.84928e-05	1	1	2	P11142	P11142 [540-550]		0	1311.61								5727	Redundant	Heavy	Peak Found	High	High	0.31	0.0001206	4.399e-05	3.71	44.89
	TRUE	High	[K].NSLESYAFNMK.[A]	1xOxidation [M10]	7.03896e-05	9.84928e-05	1	1	2	P11142	P11142 [540-550]		0	1319.59	1.295	0.28794	0	87.1	112.9	19508398	19401632	5728		Light	High	Peak Found	High	0.22	0.0001206	5.268e-05	3.29	34.1
	TRUE	High	[K].NSLESYAFNMK.[A]	1xOxidation [M10]; 1xLabel:13C(6)15N(2) [K11]	6.25474e-05	9.84928e-05	1	1	1	P11142	P11142 [540-550]		0	1327.61								5728	Redundant	Heavy	Peak Found	High	High	0.2	0.0001206	4.671e-05	3.53	34.1
	TRUE	High	[K].QTQTFTTYSDNQPGVLIQVYEGER.[A]		3.76901e-07	9.84928e-05	1	1	2	P11142	P11142 [424-447]		0	2774.33	1.261	0.400313	0	88.5	111.5	3.86611e+06	3.74396e+06	6106		Light	High	Peak Found	High	0.85	0.0001206	2.585e-07	4.92	62.7
	TRUE	High	[K].QTQTFTTYSDNQPGVLIQVYEGER.[A]	1xDeamidated [Q18]	0.00152996	0.000424254	1	1	1	P11142	P11142 [424-447]		0	2775.31								6107	No Quan Values	Light	High	Not Found	High	4.2	0.0003475	0.001259	4.35
	TRUE	High	[K].QTQTFTTYSDNQPGVLIQVYEGER.[A]	1xLabel:13C(6)15N(4) [R24]	1.15091e-07	9.84928e-05	1	1	2	P11142	P11142 [424-447]		0	2784.34								6106	Redundant	Heavy	Peak Found	High	High	0.1	0.0001206	7.764e-08	6.33	62.7
	TRUE	High	[R].RFDDAVVQSDMK.[H]		0.0534651	0.00403872	1	1	1	P11142	P11142 [77-88]		1	1410.67								6164	No Quan Values	Light	High	Not Found	High	-1.08	0.003203	0.03932	2.86
	TRUE	High	[R].RFDDAVVQSDMK.[H]	1xLabel:13C(6)15N(2) [K12]; 1xLabel:13C(6)15N(4) [R1]	0.00188629	0.000424254	1	1	2	P11142	P11142 [77-88]		1	1428.69								6164	Redundant	Heavy	Not Found	High	High	1.07	0.0003475	0.001564	3.37
	TRUE	High	[R].RFDDAVVQSDMKHWPFMVVNDAGRPK.[V]		0.0209664	0.00204583	1	1	2	P11142	P11142 [77-102]		2	3045.48	1.056	0.931899	0	97.3	102.7	1791950	1.45321e+06	6166		Light	High	Peak Found	High	0.29	0.001781	0.016	3.87	62.43
	TRUE	High	[R].RFDDAVVQSDMKHWPFMVVNDAGRPK.[V]	2xLabel:13C(6)15N(2) [K12; K26]; 2xLabel:13C(6)15N(4) [R1; R24]	0.0822914	0.00600799	1	1	1	P11142	P11142 [77-102]		2	3081.53								6166	Redundant	Heavy	Peak Found	High	High	1.47	0.00468	0.05991	2.8	62.43
	TRUE	High	[K].SFYPEEVSSMVLTK.[M]		7.62617e-07	9.84928e-05	1	1	4	P11142	P11142 [113-126]		0	1616.79	1.131	0.667931	0	93.8	106.2	2.93885e+07	2.55287e+07	6398		Light	High	Peak Found	High	-0.26	0.0001206	5.315e-07	4.03	58.69
	TRUE	High	[K].SFYPEEVSSMVLTK.[M]	1xLabel:13C(6)15N(2) [K14]	1.68957e-06	9.84928e-05	1	1	3	P11142	P11142 [113-126]		0	1624.8								6398	Redundant	Heavy	Peak Found	High	High	-0.78	0.0001206	1.186e-06	3.24	58.69
	TRUE	High	[K].SFYPEEVSSMVLTK.[M]	1xOxidation [M10]	0.000936387	0.00021741	1	1	1	P11142	P11142 [113-126]		0	1632.78	1.011	0.884277	0	99.5	100.5	1.0585e+07	8.21735e+06	6397		Light	High	Peak Found	High	-0.41	0.0002	0.0007529	2.77	48.28
	TRUE	High	[K].SFYPEEVSSMVLTK.[M]	1xOxidation [M10]; 1xLabel:13C(6)15N(2) [K14]	1.46901e-05	9.84928e-05	1	1	2	P11142	P11142 [113-126]		0	1640.8								6397	Redundant	Heavy	Peak Found	High	High	0.01	0.0001206	1.072e-05	4.41	48.28
	TRUE	High	[K].SINPDEAVAYGAAVQAAILSGDK.[S]		2.7143e-09	9.84928e-05	1	1	3	P11142	P11142 [362-384]		0	2260.15	0.974	0.836769	0	101.3	98.7	2.32235e+06	1.73705e+06	6556		Light	High	Peak Found	High	1.15	0.0001206	1.714e-09	5.01	76.86
	TRUE	High	[K].SINPDEAVAYGAAVQAAILSGDK.[S]	1xLabel:13C(6)15N(2) [K23]	6.40441e-08	9.84928e-05	1	1	1	P11142	P11142 [362-384]		0	2268.16								6556	Redundant	Heavy	Peak Found	High	High	-0.89	0.0001206	4.259e-08	5.51	76.86
	TRUE	High	[K].SQIHDIVLVGGSTR.[I]		9.29118e-05	9.84928e-05	1	1	2	P11142	P11142 [329-342]		0	1481.81	1.343	0.217356	0	85.4	114.6	1.39473e+07	14386666	6697		Light	High	Peak Found	High	0.01	0.0001206	7.012e-05	2.56	31.17
	TRUE	High	[K].SQIHDIVLVGGSTR.[I]	1xLabel:13C(6)15N(4) [R14]	3.32413e-07	9.84928e-05	1	1	2	P11142	P11142 [329-342]		0	1491.82								6697	Redundant	Heavy	Peak Found	High	High	0.77	0.0001206	2.271e-07	4.02	31.17
	TRUE	High	[K].STAGDTHLGGEDFDNR.[M]		0.0126774	0.00137984	1	2	1	P11142	P11142 [221-236]		0	1691.73								6797	No Quan Values	Light	High	Not Found	High	0.21	0.001254	0.0101	2.29
	TRUE	High	[R].TTPSYVAFTDTER.[L]		1.25131e-05	9.84928e-05	3	6	3	P17066; P11142; P0DMV9	P17066 [39-51]; P11142 [37-49]; P0DMV9 [37-49]		0	1487.7	1.249	0.371953	0	88.9	111.1	110500584	105981720	7404	Shared	Light	High	Peak Found	High	0.28	0.0001206	9.132e-06	3.27	36.55
	TRUE	High	[R].TTPSYVAFTDTER.[L]	1xLabel:13C(6)15N(4) [R13]	0.000182868	9.84928e-05	3	6	4	P17066; P11142; P0DMV9	P17066 [39-51]; P11142 [37-49]; P0DMV9 [37-49]		0	1497.71								7404	Redundant	Heavy	Peak Found	High	High	0.23	0.0001206	0.0001396	3.37	36.55
	TRUE	High	[K].TVTNAVVTVPAYFNDSQR.[Q]		7.26153e-08	9.84928e-05	1	1	5	P11142	P11142 [138-155]		0	1982								7482	Redundant	Light	High	Peak Found	High	0.23	0.0001206	4.837e-08	4.88	52.03
	TRUE	High	[K].TVTNAVVTVPAYFNDSQR.[Q]	1xLabel:13C(6)15N(4) [R18]	1.19177e-07	9.84928e-05	1	1	4	P11142	P11142 [138-155]		0	1992.01	1.088	0.806295	0	95.8	104.2	57320916	47876122	7482		Heavy	Peak Found	High	High	-0.55	0.0001206	8.039e-08	5.22	52.03
TRUE	High	Master Protein	Q86UE4	Protein LYRIC OS=Homo sapiens OX=9606 GN=MTDH PE=1 SV=2	0	357.941	52	26	166	26	582	63.8	9.32	656.97	26	Pf15686	92140	ENSG00000147649	MTDH	hsa:92140; Q05DH2; Q52QU9; Q6PK07; Q86UE4; Q8TCX3	Gastric cancer network 2; ncRNAs involved in Wnt signaling in hepatocellular carcinoma; CCL18 signaling pathway			3	0	0.896	0.660548	20.31	107.8	92.2	6.24809e+08	4.10469e+08	High	High	1
	Checked	Confidence	Annotated Sequence	Modifications	Qvality PEP	Qvality q-value	# Protein Groups	# Proteins	# PSMs	Master Protein Accessions	Positions in Master Proteins	Modifications in Master Proteins	# Missed Cleavages	Theo. MH+ [Da]	Abundance Ratio: (Heavy) / (Light)	Abundance Ratio P-Value: (Heavy) / (Light)	Abundance Ratio Variability [%]: (Heavy) / (Light)	Abundances (Grouped): Light	Abundances (Grouped): Heavy	Abundance: F1: Light, Sample	Abundance: F1: Heavy, Sample	Precursor Quan Result ID	Quan Info	Quan Channel	Found in Sample: [S1] F1: Light, Sample	Found in Sample: [S3] F1: Heavy, Sample	Confidence (by Search Engine): Sequest HT	DeltaM [ppm] (by Search Engine): Sequest HT	Percolator q-Value (by Search Engine): Sequest HT	Percolator PEP (by Search Engine): Sequest HT	XCorr (by Search Engine): Sequest HT	Top Apex RT [min]
	TRUE	High	[R].DKVLTDSGSLDSTIPGIENTITVTTEQLTTASFPVGSK.[K]		0.0015101	0.000424254	1	1	1	Q86UE4	Q86UE4 [208-245]		1	3923								1071	No Quan Values	Light	High	Not Found	High	-0.55	0.0003475	0.001242	3.47
	TRUE	High	[R].DKVLTDSGSLDSTIPGIENTITVTTEQLTTASFPVGSK.[K]	1xDeamidated [Q27]	0.0584068	0.00427507	1	1	1	Q86UE4	Q86UE4 [208-245]		1	3923.99								1072	No Quan Values	Light	High	Not Found	High	4.48	0.003373	0.04279	3.3
	TRUE	High	[R].DKVLTDSGSLDSTIPGIENTITVTTEQLTTASFPVGSK.[K]	1xDeamidated [N19]; 2xLabel:13C(6)15N(2) [K2; K38]	0.000626086	0.00021741	1	1	1	Q86UE4	Q86UE4 [208-245]		1	3940.01								1072	Redundant	Heavy	Not Found	High	High	4.64	0.0002	0.0004965	4.24
	TRUE	High	[R].DKVLTDSGSLDSTIPGIENTITVTTEQLTTASFPVGSKK.[N]	1xDeamidated [N19]; 3xLabel:13C(6)15N(2) [K2; K38; K39]	0.0218617	0.00204583	1	1	1	Q86UE4	Q86UE4 [208-246]		2	4076.12	0.797	0.418327	0	111.3	88.7	1.43966e+06	880792	1074		Heavy	Peak Found	High	High	4.26	0.001781	0.01668	3.22	80.91
	TRUE	High	[R].EEAAAVPAAAPDDLALLK.[N]		2.32734e-05	9.84928e-05	1	1	5	Q86UE4	Q86UE4 [90-107]		0	1764.94	0.669	0.0421106	0	119.9	80.1	1.46e+08	7.49771e+07	1561		Light	High	Peak Found	High	0.01	0.0001206	1.711e-05	3.18	55.44
	TRUE	High	[R].EEAAAVPAAAPDDLALLK.[N]	1xLabel:13C(6)15N(2) [K18]	4.86947e-05	9.84928e-05	1	1	3	Q86UE4	Q86UE4 [90-107]		0	1772.95								1561	Redundant	Heavy	Peak Found	High	High	-0.29	0.0001206	3.623e-05	2.84	55.44
	TRUE	High	[K].EIREDLPVNTSK.[T]		0.0222307	0.00204583	1	1	1	Q86UE4	Q86UE4 [468-479]		1	1400.74	0.925	0.78615	0	103.9	96.1	1.08892e+06	773772	1848		Light	High	Peak Found	High	0.15	0.001781	0.01688	3.4	20.59
	TRUE	High	[K].EIREDLPVNTSK.[T]	1xLabel:13C(6)15N(2) [K12]; 1xLabel:13C(6)15N(4) [R3]	0.0969591	0.00675767	1	1	1	Q86UE4	Q86UE4 [468-479]		1	1418.76								1848	Redundant	Heavy	Peak Found	High	High	-0.36	0.005216	0.07071	3.19	20.59
	TRUE	High	[R].EMLSVGLGFLR.[T]		0.000257632	9.84928e-05	1	1	1	Q86UE4	Q86UE4 [23-33]		0	1221.67	1.183	0.627401	0	91.6	108.4	1.56404e+06	1.42155e+06	1901		Light	High	Peak Found	High	0.17	0.0001206	0.0001985	2.38	68.51
	TRUE	High	[R].EMLSVGLGFLR.[T]	1xLabel:13C(6)15N(4) [R11]	0.0265051	0.0021999	1	1	1	Q86UE4	Q86UE4 [23-33]		0	1231.67								1901	Redundant	Heavy	Peak Found	High	High	0.41	0.001888	0.01997	2.39	68.51
	TRUE	High	[R].EMLSVGLGFLR.[T]	1xOxidation [M2]; 1xLabel:13C(6)15N(4) [R11]	0.00084281	0.00021741	1	1	1	Q86UE4	Q86UE4 [23-33]		0	1247.67	1.096	0.794942	0	95.4	104.6	5.68901e+06	4789916	1902		Heavy	Peak Found	High	High	-0.24	0.0002	0.0006744	2.91	61.11
	TRUE	High	[K].GDSHLNVQVSNFK.[S]		0.00361818	0.00071665	1	1	3	Q86UE4	Q86UE4 [249-261]		0	1444.72	1.039	0.995014	0	98.1	101.9	1.24255e+07	9.91925e+06	2464		Light	High	Peak Found	High	-0.18	0.0007168	0.003019	2.77	25.55
	TRUE	High	[K].GDSHLNVQVSNFK.[S]	1xLabel:13C(6)15N(2) [K13]	0.0297974	0.00261618	1	1	1	Q86UE4	Q86UE4 [249-261]		0	1452.73								2464	Redundant	Heavy	Peak Found	High	High	-0.33	0.002185	0.02229	2.35	25.55
	TRUE	High	[K].KNKGDSHLNVQVSNFK.[S]		0.000318182	9.84928e-05	1	1	1	Q86UE4	Q86UE4 [246-261]		2	1814.95	1.239	0.502115	0	89.3	110.7	1.79871e+06	1.7113e+06	3195		Light	High	Peak Found	High	0.25	0.0001206	0.000246	2.73	16.76
	TRUE	High	[K].KNKGDSHLNVQVSNFK.[S]	3xLabel:13C(6)15N(2) [K1; K3; K16]	0.0907236	0.00646166	1	1	1	Q86UE4	Q86UE4 [246-261]		2	1838.99								3195	Redundant	Heavy	Peak Found	High	High	0.26	0.005004	0.06645	2.38	16.76
	TRUE	High	[R].KREEAAAVPAAAPDDLALLK.[N]		0.00059374	0.00021741	1	1	2	Q86UE4	Q86UE4 [88-107]		2	2049.13	0.834	0.367914	0	109	91	9174731	5.87978e+06	3225		Light	High	Peak Found	High	0.62	0.0002	0.0004708	3.24	44.32
	TRUE	High	[R].KTEPSAWSQDTGDANTNGKDWGR.[S]		4.55065e-06	9.84928e-05	1	1	5	Q86UE4	Q86UE4 [316-338]		2	2521.13								3233	Redundant	Light	High	Peak Found	High	-1.62	0.0001206	3.261e-06	4.86	24.63
	TRUE	High	[R].KTEPSAWSQDTGDANTNGKDWGR.[S]	2xLabel:13C(6)15N(2) [K1; K19]; 1xLabel:13C(6)15N(4) [R23]	3.25556e-06	9.84928e-05	1	1	3	Q86UE4	Q86UE4 [316-338]		2	2547.17	0.936	0.646315	0	103.3	96.7	50730880	36456883	3233		Heavy	Peak Found	High	High	0.12	0.0001206	2.309e-06	6.26	24.63
	TRUE	High	[R].KTEPSAWSQDTGDANTNGKDWGR.[S]	1xDeamidated [N/Q]; 2xLabel:13C(6)15N(2) [K1; K19]; 1xLabel:13C(6)15N(4) [R23]	4.42516e-07	9.84928e-05	1	1	4	Q86UE4	Q86UE4 [316-338]		2	2548.15								3234	Redundant	Heavy	Peak Found	High	High	0.46	0.0001206	3.052e-07	4.68	26.44
	TRUE	High	[K].LSSQISAGEEKWNSVSPASAGK.[R]		0.000555589	0.00021741	1	1	1	Q86UE4	Q86UE4 [293-314]		1	2233.11								4518	No Quan Values	Light	High	Not Found	High	1.25	0.0002	0.0004391	4.05
	TRUE	High	[K].NKGDSHLNVQVSNFK.[S]		5.89086e-07	9.84928e-05	1	1	3	Q86UE4	Q86UE4 [247-261]		1	1686.86	1.082	0.824422	0	96.1	103.9	5.0646e+07	4.20907e+07	5577		Light	High	Peak Found	High	-0.21	0.0001206	4.085e-07	4.5	20.01
	TRUE	High	[K].NKGDSHLNVQVSNFK.[S]	2xLabel:13C(6)15N(2) [K2; K15]	7.11193e-06	9.84928e-05	1	1	3	Q86UE4	Q86UE4 [247-261]		1	1702.88								5577	Redundant	Heavy	Peak Found	High	High	-1.68	0.0001206	5.11e-06	4.62	20.01
	TRUE	High	[K].NSQPIKTLPPATSTEPSVILSK.[S]		3.46655e-06	9.84928e-05	1	1	3	Q86UE4	Q86UE4 [505-526]		1	2308.28	0.877	0.503788	0	106.6	93.4	8757553	5.89734e+06	5740		Light	High	Peak Found	High	0.14	0.0001206	2.476e-06	5.21	41.6
	TRUE	High	[K].NSQPIKTLPPATSTEPSVILSK.[S]	2xLabel:13C(6)15N(2) [K6; K22]	0.000129536	9.84928e-05	1	1	2	Q86UE4	Q86UE4 [505-526]		1	2324.3								5740	Redundant	Heavy	Peak Found	High	High	1.29	0.0001206	9.822e-05	3.15	41.6
	TRUE	High	[K].SDSDKSSSQVPPILQETDK.[S]		3.84902e-06	9.84928e-05	1	1	6	Q86UE4	Q86UE4 [527-545]		1	2061	0.652	0.0312207	0	121.1	78.9	2.03598e+07	10187082	6305		Light	High	Peak Found	High	-0.26	0.0001206	2.746e-06	4.74	31.31
	TRUE	High	[K].SDSDKSSSQVPPILQETDK.[S]	2xLabel:13C(6)15N(2) [K5; K19]	3.10008e-07	9.84928e-05	1	1	2	Q86UE4	Q86UE4 [527-545]		1	2077.03								6305	Redundant	Heavy	Peak Found	High	High	2.18	0.0001206	2.129e-07	5.19	31.27
	TRUE	High	[K].SDSDKSSSQVPPILQETDKSK.[S]		0.000733804	0.00021741	1	1	2	Q86UE4	Q86UE4 [527-547]		2	2276.13								6306	No Quan Values	Light	High	Not Found	High	-0.6	0.0002	0.0005852	3.8
	TRUE	High	[K].SDSDKSSSQVPPILQETDKSK.[S]	3xLabel:13C(6)15N(2) [K5; K19; K21]	0.000980465	0.00021741	1	1	2	Q86UE4	Q86UE4 [527-547]		2	2300.17								6306	Redundant	Heavy	Not Found	High	High	-1.58	0.0002	0.0007921	2.55
	TRUE	High	[K].SGKGDSTLQVSSGLNENLTVNGGGWNEK.[S]		1.01458e-10	9.84928e-05	1	1	9	Q86UE4	Q86UE4 [262-289]		1	2848.37	1.349	0.347064	0	85.2	114.8	3.02301e+06	3.13111e+06	6429		Light	High	Peak Found	High	-0.31	0.0001206	6.08e-11	7.57	47.01
	TRUE	High	[K].SGKGDSTLQVSSGLNENLTVNGGGWNEK.[S]	2xLabel:13C(6)15N(2) [K3; K28]	1.64259e-08	9.84928e-05	1	1	7	Q86UE4	Q86UE4 [262-289]		1	2864.4								6429	Redundant	Heavy	Peak Found	High	High	-1.28	0.0001206	1.069e-08	6.92	47.01
	TRUE	High	[K].SGKGDSTLQVSSGLNENLTVNGGGWNEK.[S]	1xDeamidated [N/Q]; 2xLabel:13C(6)15N(2) [K3; K28]	1.26862e-09	9.84928e-05	1	1	5	Q86UE4	Q86UE4 [262-289]		1	2865.38	0.474	0.0123525	0	135.7	64.3	2.19004e+06	797513	6430		Heavy	Peak Found	High	High	0.37	0.0001206	7.955e-10	7.01	48.06
	TRUE	High	[R].SIFSGIGSTAEPVSQSTTSDYQWDVSR.[N]		5.12113e-10	9.84928e-05	1	1	4	Q86UE4	Q86UE4 [344-370]		0	2905.35	0.902	0.528154	0	105.2	94.8	40523413	28071603	6518		Light	High	Peak Found	High	-0.58	0.0001206	3.148e-10	7.24	63.81
	TRUE	High	[R].SIFSGIGSTAEPVSQSTTSDYQWDVSR.[N]	1xLabel:13C(6)15N(4) [R27]	9.73134e-10	9.84928e-05	1	1	3	Q86UE4	Q86UE4 [344-370]		0	2915.36								6518	Redundant	Heavy	Peak Found	High	High	0.01	0.0001206	6.068e-10	6.33	63.81
	TRUE	High	[K].SSSQVPPILQETDK.[S]		0.000826316	0.00021741	1	1	3	Q86UE4	Q86UE4 [532-545]		0	1528.79	0.839	0.304959	0	108.8	91.2	14033911	9041224	6788		Light	High	Peak Found	High	0.24	0.0002	0.0006626	2.48	35.55
	TRUE	High	[K].SSSQVPPILQETDK.[S]	1xLabel:13C(6)15N(2) [K14]	0.000305476	9.84928e-05	1	1	2	Q86UE4	Q86UE4 [532-545]		0	1536.8								6788	Redundant	Heavy	Peak Found	High	High	-0.26	0.0001206	0.0002371	2.97	35.55
	TRUE	High	[R].SWQDELAQQAEEGSAR.[L]		4.84461e-08	9.84928e-05	1	1	3	Q86UE4	Q86UE4 [5-20]		0	1804.81	0.936	0.645714	0	103.3	96.7	73170040	52573004	6883		Light	High	Peak Found	High	-0.12	0.0001206	3.222e-08	6.63	47.2
	TRUE	High	[R].SWQDELAQQAEEGSAR.[L]	1xLabel:13C(6)15N(4) [R16]	1.74906e-08	9.84928e-05	1	1	3	Q86UE4	Q86UE4 [5-20]		0	1814.82								6883	Redundant	Heavy	Peak Found	High	High	0.17	0.0001206	1.138e-08	5.34	47.2
	TRUE	High	[R].TELGLDLGLEPK.[R]	1xLabel:13C(6)15N(2) [K12]	6.40532e-06	9.84928e-05	1	1	2	Q86UE4	Q86UE4 [34-45]		0	1292.72	0.897	0.50966	0	105.5	94.5	21033744	14482079	7019		Heavy	Peak Found	High	High	-0.35	0.0001206	4.594e-06	3.89	54.34
	TRUE	High	[K].TEPSAWSQDTGDANTNGKDWGR.[S]		4.73581e-05	9.84928e-05	1	1	3	Q86UE4	Q86UE4 [317-338]		1	2393.04								7025	Redundant	Light	High	Peak Found	High	-0.21	0.0001206	3.528e-05	4.1	30.65
	TRUE	High	[K].TEPSAWSQDTGDANTNGKDWGR.[S]	1xLabel:13C(6)15N(2) [K18]; 1xLabel:13C(6)15N(4) [R22]	0.000170706	9.84928e-05	1	1	3	Q86UE4	Q86UE4 [317-338]		1	2411.06	0.886	0.425254	0	106.1	93.9	13059154	8884413	7025		Heavy	Peak Found	High	High	0.61	0.0001206	0.0001304	4.02	30.65
	TRUE	High	[K].TLPPATSTEPSVILSK.[S]		0.000104529	9.84928e-05	1	1	3	Q86UE4	Q86UE4 [511-526]		0	1640.91	0.716	0.0873148	0	116.5	83.5	34214228	18823854	7197		Light	High	Peak Found	High	0.12	0.0001206	7.873e-05	2.25	40.67
	TRUE	High	[K].TLPPATSTEPSVILSK.[S]	1xLabel:13C(6)15N(2) [K16]	0.00104014	0.00021741	1	1	3	Q86UE4	Q86UE4 [511-526]		0	1648.92								7197	Redundant	Heavy	Peak Found	High	High	0.61	0.0002	0.0008439	1.73	40.67
	TRUE	High	[K].TISTSDPAEVLVK.[N]		5.40504e-05	9.84928e-05	1	1	4	Q86UE4	Q86UE4 [492-504]		0	1359.74	0.977	0.797803	0	101.2	98.8	90484384	67901448	7212		Light	High	Peak Found	High	-0.15	0.0001206	4.041e-05	2.11	38.24
	TRUE	High	[K].TISTSDPAEVLVK.[N]	1xLabel:13C(6)15N(2) [K13]	0.000218614	9.84928e-05	1	1	3	Q86UE4	Q86UE4 [492-504]		0	1367.75								7212	Redundant	Heavy	Peak Found	High	High	-1.68	0.0001206	0.0001677	2.93	38.24
	TRUE	High	[R].TVEVAEGEAVR.[T]		0.00130795	0.000339819	1	1	1	Q86UE4	Q86UE4 [132-142]		0	1159.6	0.677	0.252441	0	119.3	80.7	626256	325557	7439		Light	High	Peak Found	High	-1.12	0.0002891	0.001069	2.05	18.49
	TRUE	High	[R].TVEVAEGEAVRTPQSVTAK.[Q]		0.000794274	0.00021741	1	1	1	Q86UE4	Q86UE4 [132-150]		1	1972.03								7440	No Quan Values	Light	High	Not Found	High	-0.17	0.0002	0.0006358	3.04
	TRUE	High	[K].VLTDSGSLDSTIPGIENTITVTTEQLTTASFPVGSKK.[N]		0.000655795	0.00021741	1	1	2	Q86UE4	Q86UE4 [210-246]		1	3807.97	0.789	0.474196	0	111.8	88.2	479883	290672	7963		Light	High	Peak Found	High	-0.24	0.0002	0.0005198	3.65	83.97
TRUE	High	Master Protein	P22314	Ubiquitin-like modifier-activating enzyme 1 OS=Homo sapiens OX=9606 GN=UBA1 PE=1 SV=3	0	333.94	32	25	103	25	1058	117.8	5.76	397.32	25	Pf00899, Pf09358, Pf10585, Pf16190, Pf16191	7317	ENSG00000130985	UBA1	hsa:7317; P22314; Q5JRR8; Q96E13	Proteasome degradation; Parkin-ubiquitin proteasomal system pathway; Parkinson's disease pathway	Synthesis of active ubiquitin: roles of E1 and E2 enzymes; Antigen processing: Ubiquitination & Proteasome degradation	Ubiquitin mediated proteolysis; Parkinson disease; Pathways of neurodegeneration	8	0	1.126	0.646188	17.75	100.8	99.2	3.48072e+08	2.63263e+08	High	High	1
	Checked	Confidence	Annotated Sequence	Modifications	Qvality PEP	Qvality q-value	# Protein Groups	# Proteins	# PSMs	Master Protein Accessions	Positions in Master Proteins	Modifications in Master Proteins	# Missed Cleavages	Theo. MH+ [Da]	Abundance Ratio: (Heavy) / (Light)	Abundance Ratio P-Value: (Heavy) / (Light)	Abundance Ratio Variability [%]: (Heavy) / (Light)	Abundances (Grouped): Light	Abundances (Grouped): Heavy	Abundance: F1: Light, Sample	Abundance: F1: Heavy, Sample	Precursor Quan Result ID	Quan Info	Quan Channel	Found in Sample: [S1] F1: Light, Sample	Found in Sample: [S3] F1: Heavy, Sample	Confidence (by Search Engine): Sequest HT	DeltaM [ppm] (by Search Engine): Sequest HT	Percolator q-Value (by Search Engine): Sequest HT	Percolator PEP (by Search Engine): Sequest HT	XCorr (by Search Engine): Sequest HT	Top Apex RT [min]
	TRUE	High	[R].AAVATFLQSVQVPEFTPK.[S]		2.93177e-07	9.84928e-05	1	1	4	P22314	P22314 [785-802]		0	1933.04	0.992	0.854443	0	100.4	99.6	2.3206e+07	1.76869e+07	72		Light	High	Peak Found	High	-0.18	0.0001206	2.009e-07	4.67	71.03
	TRUE	High	[R].AAVATFLQSVQVPEFTPK.[S]	1xLabel:13C(6)15N(2) [K18]	5.76882e-07	9.84928e-05	1	1	2	P22314	P22314 [785-802]		0	1941.06								72	Redundant	Heavy	Peak Found	High	High	-0.01	0.0001206	3.98e-07	4.18	71.03
	TRUE	High	[R].ALPAVQQNNLDEDLIR.[K]		7.01254e-08	9.84928e-05	1	1	2	P22314	P22314 [369-384]		0	1808.95	0.944	0.63328	0	102.9	97.1	10905783	7902803	415		Light	High	Peak Found	High	0.72	0.0001206	4.679e-08	4.84	50.17
	TRUE	High	[R].ALPAVQQNNLDEDLIR.[K]	1xLabel:13C(6)15N(4) [R16]	6.4759e-05	9.84928e-05	1	1	1	P22314	P22314 [369-384]		0	1818.96								415	Redundant	Heavy	Peak Found	High	High	1.08	0.0001206	4.832e-05	4.26	50.17
	TRUE	High	[R].ALPAVQQNNLDEDLIRK.[L]		0.000912078	0.00021741	1	1	1	P22314	P22314 [369-385]		1	1937.05								417	Redundant	Light	High	Not Found	High	-0.9	0.0002	0.0007354	2.9
	TRUE	High	[R].ALPAVQQNNLDEDLIRK.[L]	1xLabel:13C(6)15N(2) [K17]; 1xLabel:13C(6)15N(4) [R16]	0.000789053	0.00021741	1	1	1	P22314	P22314 [369-385]		1	1955.07								417	No Quan Values	Heavy	Not Found	High	High	1.17	0.0002	0.0006318	2.94
	TRUE	High	[K].ATLPSPDKLPGFK.[M]	2xLabel:13C(6)15N(2) [K8; K13]	0.0798299	0.00577027	1	1	1	P22314	P22314 [831-843]		1	1386.8	0.894	0.499629	0	105.6	94.4	20783282	14261719	741		Heavy	Peak Found	High	High	-0.33	0.004448	0.05844	1.4	40.61
	TRUE	High	[R].DEFEGLFK.[Q]	1xLabel:13C(6)15N(2) [K8]	0.130449	0.00934995	1	1	1	P22314	P22314 [650-657]		0	992.481	1.183	0.591816	0	91.6	108.4	4997791	4542508	938		Heavy	Peak Found	High	High	0.02	0.007205	0.09625	1.88	52.39
	TRUE	High	[R].DEFEGLFKQPAENVNQYLTDPK.[F]		2.83035e-09	9.84928e-05	1	1	2	P22314	P22314 [650-671]		1	2582.24	0.955	0.711113	0	102.3	97.7	15815801	11594603	939		Light	High	Peak Found	High	-0.12	0.0001206	1.792e-09	5.22	65.14
	TRUE	High	[R].DEFEGLFKQPAENVNQYLTDPK.[F]	2xLabel:13C(6)15N(2) [K8; K22]	2.23352e-06	9.84928e-05	1	1	1	P22314	P22314 [650-671]		1	2598.27								939	Redundant	Heavy	Peak Found	High	High	0.56	0.0001206	1.579e-06	4.47	65.14
	TRUE	High	[K].ERLDQPMTEIVSR.[V]	1xOxidation [M7]; 2xLabel:13C(6)15N(4) [R2; R13]	0.0237707	0.00211525	1	1	1	P22314	P22314 [1009-1021]		1	1609.81	1.304	0.353343	0	86.8	113.2	4.09264e+06	4.09701e+06	1997		Heavy	Peak Found	High	High	-0.84	0.001829	0.01805	2.91	21.25
	TRUE	High	[K].GNVQVVIPFLTESYSSSQDPPEK.[S]		6.04109e-05	9.84928e-05	1	1	3	P22314	P22314 [605-627]		0	2521.25	0.674	0.104593	0	119.5	80.5	7.08808e+06	3.67041e+06	2754		Light	High	Peak Found	High	-0.4	0.0001206	4.513e-05	3.71	69.54
	TRUE	High	[K].GNVQVVIPFLTESYSSSQDPPEK.[S]	1xLabel:13C(6)15N(2) [K23]	1.78573e-05	9.84928e-05	1	1	2	P22314	P22314 [605-627]		0	2529.26								2754	Redundant	Heavy	Peak Found	High	High	0.17	0.0001206	1.308e-05	3.41	69.54
	TRUE	High	[R].KLAYVAAGDLAPINAFIGGLAAQEVMK.[A]	1xOxidation [M26]	0.00204094	0.000424254	1	1	1	P22314	P22314 [385-411]		1	2747.48	0.995	0.95497	0	100.2	99.8	212099	162141	3143		Light	High	Peak Found	High	-0.54	0.0003475	0.001691	3.07	80.76
	TRUE	High	[R].LAGTQPLEVLEAVQR.[S]		4.33282e-08	9.84928e-05	1	1	4	P22314	P22314 [679-693]		0	1623.91	0.986	0.829677	0	100.7	99.3	45107507	3.41479e+07	3316		Light	High	Peak Found	High	-0.4	0.0001206	2.867e-08	5.26	60.45
	TRUE	High	[R].LAGTQPLEVLEAVQR.[S]	1xLabel:13C(6)15N(4) [R15]	1.2692e-06	9.84928e-05	1	1	3	P22314	P22314 [679-693]		0	1633.91								3316	Redundant	Heavy	Peak Found	High	High	0.17	0.0001206	8.875e-07	3.89	60.45
	TRUE	High	[K].LAYVAAGDLAPINAFIGGLAAQEVMK.[A]	1xOxidation [M25]	1.17526e-07	9.84928e-05	1	1	1	P22314	P22314 [386-411]		0	2619.39	1.008	0.997828	0	99.6	100.4	329651	255220	3407		Light	High	Peak Found	High	-0.31	0.0001206	7.892e-08	6.14	87.22
	TRUE	High	[K].LAYVAAGDLAPINAFIGGLAAQEVMK.[A]	1xOxidation [M25]; 1xLabel:13C(6)15N(2) [K26]	9.94041e-06	9.84928e-05	1	1	1	P22314	P22314 [386-411]		0	2627.4								3407	Redundant	Heavy	Peak Found	High	High	0.93	0.0001206	7.187e-06	4.66	87.22
	TRUE	High	[R].LDQPMTEIVSR.[V]		0.000318182	9.84928e-05	1	1	1	P22314	P22314 [1011-1021]		0	1288.66								3467	Redundant	Light	High	Peak Found	High	0.07	0.0001206	0.000246	2.76	35.54
	TRUE	High	[R].LDQPMTEIVSR.[V]	1xLabel:13C(6)15N(4) [R11]	3.41421e-05	9.84928e-05	1	1	2	P22314	P22314 [1011-1021]		0	1298.66	1.082	0.823715	0	96	104	19307422	16049043	3467		Heavy	Peak Found	High	High	-0.09	0.0001206	2.524e-05	3.47	35.54
	TRUE	High	[R].LDQPMTEIVSR.[V]	1xOxidation [M5]; 1xLabel:13C(6)15N(4) [R11]	1.73661e-05	9.84928e-05	1	1	1	P22314	P22314 [1011-1021]		0	1314.66	1.138	0.65167	0	93.5	106.5	7176394	6.27285e+06	3466		Heavy	Peak Found	High	High	0.52	0.0001206	1.271e-05	3.04	23
	TRUE	High	[K].IHVSDQELQSANASVDDSR.[L]		5.9718e-09	9.84928e-05	1	1	4	P22314	P22314 [807-825]		0	2070.97								3827	Redundant	Light	High	Peak Found	High	-0.87	0.0001206	3.834e-09	4.96	27.82
	TRUE	High	[K].IHVSDQELQSANASVDDSR.[L]	1xLabel:13C(6)15N(4) [R19]	1.78578e-09	9.84928e-05	1	1	4	P22314	P22314 [807-825]		0	2080.98	1.205	0.467913	0	90.7	109.3	3.54306e+07	32791544	3827		Heavy	Peak Found	High	High	1.03	0.0001206	1.124e-09	6.71	27.82
	TRUE	High	[R].LQTSSVLVSGLR.[G]		0.00066015	0.00021741	1	1	2	P22314	P22314 [70-81]		0	1259.73	1.303	0.275043	0	86.8	113.2	22703324	22718712	4393		Light	High	Peak Found	High	0.12	0.0002	0.0005251	1.92	39.96
	TRUE	High	[R].LQTSSVLVSGLR.[G]	1xLabel:13C(6)15N(4) [R12]	5.89091e-06	9.84928e-05	1	1	2	P22314	P22314 [70-81]		0	1269.74								4393	Redundant	Heavy	Peak Found	High	High	0.06	0.0001206	4.22e-06	3.52	39.96
	TRUE	High	[R].IYDDDFFQNLDGVANALDNVDAR.[M]		5.57102e-07	9.84928e-05	1	1	2	P22314	P22314 [559-581]		0	2600.19	1.128	0.724784	0	94	106	961109	832438	4768		Light	High	Peak Found	High	-0.48	0.0001206	3.838e-07	5.19	84.47
	TRUE	High	[R].IYDDDFFQNLDGVANALDNVDAR.[M]	1xLabel:13C(6)15N(4) [R23]	7.57276e-06	9.84928e-05	1	1	2	P22314	P22314 [559-581]		0	2610.2								4768	Redundant	Heavy	Peak Found	High	High	-0.34	0.0001206	5.46e-06	4.25	84.47
	TRUE	High	[R].NEEDAAELVALAQAVNAR.[A]		2.187e-07	9.84928e-05	1	1	3	P22314	P22314 [351-368]		0	1883.95	1.222	0.428714	0	90	110	28980299	2.71996e+07	5494		Light	High	Peak Found	High	0.85	0.0001206	1.487e-07	4.66	68.34
	TRUE	High	[R].NEEDAAELVALAQAVNAR.[A]	1xLabel:13C(6)15N(4) [R18]	4.09692e-09	9.84928e-05	1	1	3	P22314	P22314 [351-368]		0	1893.95								5494	Redundant	Heavy	Peak Found	High	High	0.48	0.0001206	2.602e-09	5.36	68.34
	TRUE	High	[K].NFPNAIEHTLQWAR.[D]		2.92909e-05	9.84928e-05	1	1	1	P22314	P22314 [636-649]		0	1696.86								5530	No Quan Values	Light	High	Not Found	High	-0.05	0.0001206	2.166e-05	2.47
	TRUE	High	[K].NGSEADIDEGLYSR.[Q]		1.31426e-06	9.84928e-05	1	1	2	P22314	P22314 [44-57]		0	1525.68								5561	Redundant	Light	High	Peak Found	High	-0.09	0.0001206	9.234e-07	3.89	30.46
	TRUE	High	[K].NGSEADIDEGLYSR.[Q]	1xLabel:13C(6)15N(4) [R14]	2.62233e-06	9.84928e-05	1	1	3	P22314	P22314 [44-57]		0	1535.68	1.157	0.605856	0	92.7	107.3	13893640	12342346	5561		Heavy	Peak Found	High	High	-0.07	0.0001206	1.862e-06	4.42	30.46
	TRUE	High	[R].QFLFRPWDVTK.[L]		0.00202757	0.000424254	1	1	1	P22314	P22314 [516-526]		0	1436.77	1.301	0.2775	0	86.9	113.1	10370491	10363219	5910		Light	High	Peak Found	High	0.12	0.0003475	0.001678	1.07	57.53
	TRUE	High	[R].QLLHNFPPDQLTSSGAPFWSGPK.[R]		3.51527e-06	9.84928e-05	1	1	3	P22314	P22314 [724-746]		0	2524.26								5978	No Quan Values	Light	High	Not Found	High	1.28	0.0001206	2.503e-06	4.49
	TRUE	High	[R].QNRYDGQVAVFGSDLQEK.[L]	1xLabel:13C(6)15N(2) [K18]; 1xLabel:13C(6)15N(4) [R3]	0.000387141	9.84928e-05	1	1	3	P22314	P22314 [448-465]		1	2072.02	1.262	0.370042	0	88.4	111.6	7234217	7012242	6035		Heavy	Peak Found	High	High	0.6	0.0001206	0.0003028	3.54	38.54
	TRUE	High	[K].QPAENVNQYLTDPK.[F]		0.000563023	0.00021741	1	1	1	P22314	P22314 [658-671]		0	1616.79	0.746	0.172741	0	114.5	85.5	9100845	5214084	6038		Light	High	Peak Found	High	-0.39	0.0002	0.0004441	3.1	33.26
	TRUE	High	[K].SLVASLAEPDFVVTDFAK.[F]		1.2429e-06	9.84928e-05	1	1	3	P22314	P22314 [305-322]		0	1909	1.125	0.701144	0	94.1	105.9	13897644	12007502	6579		Light	High	Peak Found	High	-0.23	0.0001206	8.705e-07	4.93	74.26
	TRUE	High	[K].SLVASLAEPDFVVTDFAK.[F]	1xLabel:13C(6)15N(2) [K18]	9.40063e-08	9.84928e-05	1	1	3	P22314	P22314 [305-322]		0	1917.01								6579	Redundant	Heavy	Peak Found	High	High	-0.24	0.0001206	6.321e-08	5.03	74.26
	TRUE	High	[R].YDGQVAVFGSDLQEK.[L]		3.01504e-06	9.84928e-05	1	1	2	P22314	P22314 [451-465]		0	1655.79								8340	Redundant	Light	High	Peak Found	High	0.8	0.0001206	2.137e-06	4.02	44.48
	TRUE	High	[R].YDGQVAVFGSDLQEK.[L]	1xLabel:13C(6)15N(2) [K15]	7.84202e-07	9.84928e-05	1	1	1	P22314	P22314 [451-465]		0	1663.81	1.369	0.191237	0	84.4	115.6	9199588	9674956	8340		Heavy	Peak Found	High	High	0.48	0.0001206	5.433e-07	4.35	44.48
TRUE	High	Master Protein	P08238	Heat shock protein HSP 90-beta OS=Homo sapiens OX=9606 GN=HSP90AB1 PE=1 SV=4	0	317.291	41	29	132	10	724	83.2	5.03	423.62	29	Pf00183, Pf02518	3326	ENSG00000096384	HSP90AB1	B2R5P0; hsa:3326; P08238; Q5T9W7; Q9NQW0; Q9NTK6	Nuclear receptors meta-pathway; NRF2 pathway; Focal adhesion: PI3K-Akt-mTOR-signaling pathway; PI3K-Akt signaling pathway	The role of GTSE1 in G2/M progression after G2 checkpoint; HSP90 chaperone cycle for steroid hormone receptors (SHR) in the presence of ligand; Regulation of actin dynamics for phagocytic cup formation; Neutrophil degranulation; Chaperone Mediated Autophagy; Potential therapeutics for SARS; Estrogen-dependent gene expression; Sema3A PAK dependent Axon repulsion; DDX58/IFIH1-mediated induction of …	Protein processing in endoplasmic reticulum; PI3K-Akt signaling pathway; Necroptosis; Antigen processing and presentation; NOD-like receptor signaling pathway; IL-17 signaling pathway; Th17 cell differentiation; Progesterone-mediated oocyte maturation; Estrogen signaling pathway; Salmonella infection; Pathways in cancer; Chemical carcinogenesis; Prostate cancer; Lipid and atherosclerosis; Fluid s…	37	20	1.243	0.397569	14.57	89.4	110.6	5.69598e+08	5.41287e+08	High	High	1
	Checked	Confidence	Annotated Sequence	Modifications	Qvality PEP	Qvality q-value	# Protein Groups	# Proteins	# PSMs	Master Protein Accessions	Positions in Master Proteins	Modifications in Master Proteins	# Missed Cleavages	Theo. MH+ [Da]	Abundance Ratio: (Heavy) / (Light)	Abundance Ratio P-Value: (Heavy) / (Light)	Abundance Ratio Variability [%]: (Heavy) / (Light)	Abundances (Grouped): Light	Abundances (Grouped): Heavy	Abundance: F1: Light, Sample	Abundance: F1: Heavy, Sample	Precursor Quan Result ID	Quan Info	Quan Channel	Found in Sample: [S1] F1: Light, Sample	Found in Sample: [S3] F1: Heavy, Sample	Confidence (by Search Engine): Sequest HT	DeltaM [ppm] (by Search Engine): Sequest HT	Percolator q-Value (by Search Engine): Sequest HT	Percolator PEP (by Search Engine): Sequest HT	XCorr (by Search Engine): Sequest HT	Top Apex RT [min]
	TRUE	High	[K].ADLINNLGTIAK.[SF]		2.17065e-05	9.84928e-05	3	4	1	P07900; P08238; Q58FF8	P07900 [101-112]; P08238 [96-107]; Q58FF8 [96-107]		0	1242.71								120	Redundant	Light	High	Peak Found	High	0.19	0.0001206	1.592e-05	2.6	46.09
	TRUE	High	[K].ADLINNLGTIAK.[SF]	1xLabel:13C(6)15N(2) [K12]	6.63269e-06	9.84928e-05	3	4	3	P07900; P08238; Q58FF8	P07900 [101-112]; P08238 [96-107]; Q58FF8 [96-107]		0	1250.72	1.244	0.381984	0	89.1	110.9	99080736	94652680	120	Shared	Heavy	Peak Found	High	High	0.45	0.0001206	4.789e-06	3.58	46.09
	TRUE	High	[R].ALLFIPR.[R]		0.0061583	0.000965695	1	1	2	P08238	P08238 [331-337]		0	829.529	1.256	0.356969	0	88.6	111.4	22258832	21478136	387		Light	High	Peak Found	High	0.1	0.0008827	0.005094	1.89	49.24
	TRUE	High	[R].ALLFIPR.[R]	1xLabel:13C(6)15N(4) [R7]	0.00469918	0.00081157	1	1	2	P08238	P08238 [331-337]		0	839.538								387	Redundant	Heavy	Peak Found	High	High	0.36	0.0007817	0.003913	1.57	49.24
	TRUE	High	[K].AQALRDNSTMGYMMAK.[K]	1xOxidation [M14]	0.0109756	0.00112166	2	2	1	P08238; Q58FF7	P08238 [608-623]; Q58FF7 [481-496]		1	1803.82								582	No Quan Values	Light	High	Not Found	High	0.64	0.00106	0.008778	1.73
	TRUE	High	[K].AQALRDNSTMGYMMAK.[K]	1xLabel:13C(6)15N(2) [K16]; 1xLabel:13C(6)15N(4) [R5]	4.80218e-05	9.84928e-05	2	2	1	P08238; Q58FF7	P08238 [608-623]; Q58FF7 [481-496]		1	1805.85								583	No Quan Values	Heavy	Not Found	High	High	-3.06	0.0001206	3.568e-05	3.91
	TRUE	High	[K].AQALRDNSTMGYMMAK.[K]	2xOxidation [M13; M14]; 1xLabel:13C(6)15N(2) [K16]; 1xLabel:13C(6)15N(4) [R5]	0.126085	0.00929436	2	2	1	P08238; Q58FF7	P08238 [608-623]; Q58FF7 [481-496]		1	1837.84	1.522	0.191834	0	79.3	120.7	400770	468376	584	Shared	Heavy	Peak Found	High	High	2.11	0.007052	0.09267	2.9	17.98
	TRUE	High	[R].DNSTMGYMMAK.[K]		0.0517636	0.00403872	2	2	1	P08238; Q58FF7	P08238 [613-623]; Q58FF7 [486-496]		0	1248.51	1.305	0.347056	0	86.8	113.2	4802325	4813420	1236	Shared	Light	High	Peak Found	High	1.05	0.003203	0.03793	2.21	31.5
	TRUE	High	[R].DNSTMGYMMAK.[K]	1xLabel:13C(6)15N(2) [K11]	0.00114758	0.000339819	2	2	1	P08238; Q58FF7	P08238 [613-623]; Q58FF7 [486-496]		0	1256.52								1236	Redundant	Heavy	Peak Found	High	High	0.43	0.0002891	0.0009326	3.03
	TRUE	High	[K].EGLELPEDEEEK.[K]		0.000865305	0.00021741	3	5	2	P07900; P08238; Q58FF7	P07900 [547-558]; P08238 [539-550]; Q58FF7 [412-423]		0	1416.64	1.005	0.902691	0	99.7	100.3	42430608	32764642	1693	Shared	Light	High	Peak Found	High	0.33	0.0002	0.0006969	2.75	31.87
	TRUE	High	[K].EGLELPEDEEEK.[K]	1xLabel:13C(6)15N(2) [K12]	1.53178e-05	9.84928e-05	3	5	2	P07900; P08238; Q58FF7	P07900 [547-558]; P08238 [539-550]; Q58FF7 [412-423]		0	1424.65								1693	Redundant	Heavy	Peak Found	High	High	0.31	0.0001206	1.117e-05	2.8	31.87
	TRUE	High	[R].ELISNASDALDK.[I]		0.00124131	0.000339819	2	2	1	P14625; P08238	P14625 [103-114]; P08238 [42-53]		0	1275.64								1827	Redundant	Light	High	Peak Found	High	0.09	0.0002891	0.001015	3.34	31.28
	TRUE	High	[R].ELISNASDALDK.[I]	1xLabel:13C(6)15N(2) [K12]	0.00289828	0.000632611	2	2	1	P14625; P08238	P14625 [103-114]; P08238 [42-53]		0	1283.66	1.163	0.620891	0	92.5	107.5	8713616	7783062	1827	Shared	Heavy	Peak Found	High	High	0.54	0.0004992	0.002427	2.44	31.28
	TRUE	High	[R].ELISNASDALDKIR.[LY]	1xLabel:13C(6)15N(2) [K12]; 1xLabel:13C(6)15N(4) [R14]	0.0233759	0.00204583	2	2	1	P14625; P08238	P14625 [103-116]; P08238 [42-55]		1	1562.85	1.243	0.403034	0	89.2	110.8	9198968	8783274	1828	Shared	Heavy	Peak Found	High	High	-0.6	0.001781	0.01774	1.78	43.43
	TRUE	High	[K].HFSVEGQLEFR.[A]		0.0998375	0.0069094	3	5	1	P07900; P08238; Q58FF7	P07900 [328-338]; P08238 [320-330]; Q58FF7 [262-272]		0	1348.66	1.843	0.062817	0	70.3	129.7	50051.4	70846.5	2995	Shared	Light	High	Peak Found	High	-1.28	0.005326	0.07303	2.05	117.5
	TRUE	High	[K].HFSVEGQLEFR.[A]	1xLabel:13C(6)15N(4) [R11]	0.00589653	0.000965695	3	5	1	P07900; P08238; Q58FF7	P07900 [328-338]; P08238 [320-330]; Q58FF7 [262-272]		0	1358.67								2995	Redundant	Heavy	Peak Found	High	High	-1.54	0.0008827	0.004885	2.84	117.5
	TRUE	High	[K].HLEINPDHPIVETLR.[Q]		0.000705286	0.00021741	1	1	1	P08238	P08238 [625-639]		0	1782.95	1.098	0.766337	0	95.3	104.7	7162329	6037369	3020		Light	High	Peak Found	High	-0.26	0.0002	0.0005623	2.97	41.38
	TRUE	High	[K].HNDDEQYAWESSAGGSFTVR.[TA]		3.11862e-05	9.84928e-05	2	3	2	P07900; P08238	P07900 [154-173]; P08238 [149-168]		0	2255.96	1.121	0.752966	0	94.3	105.7	270348	232756	3029	Shared	Light	High	Peak Found	High	0.34	0.0001206	2.305e-05	4.56	117.5
	TRUE	High	[K].HNDDEQYAWESSAGGSFTVR.[TA]	1xLabel:13C(6)15N(4) [R20]	0.000106723	9.84928e-05	2	3	2	P07900; P08238	P07900 [154-173]; P08238 [149-168]		0	2265.97								3029	Redundant	Heavy	Peak Found	High	High	2.39	0.0001206	8.079e-05	3.97	117.5
	TRUE	High	[K].HSQFIGYPITLYLEK.[E]		7.67957e-07	9.84928e-05	3	3	4	P08238; Q58FF8; Q58FF7	P08238 [205-219]; Q58FF8 [127-141]; Q58FF7 [184-198]		0	1808.96	1.217	0.449207	0	90.2	109.8	1.35947e+07	1.27049e+07	3052	Shared	Light	High	Peak Found	High	0.41	0.0001206	5.35e-07	3.8	65.84
	TRUE	High	[K].HSQFIGYPITLYLEK.[E]	1xLabel:13C(6)15N(2) [K15]	2.02566e-06	9.84928e-05	3	3	3	P08238; Q58FF8; Q58FF7	P08238 [205-219]; Q58FF8 [127-141]; Q58FF7 [184-198]		0	1816.97								3052	Redundant	Heavy	Peak Found	High	High	0.49	0.0001206	1.431e-06	3.04	65.84
	TRUE	High	[K].KHLEINPDHPIVETLR.[Q]		1.28671e-05	9.84928e-05	1	1	2	P08238	P08238 [624-639]		1	1911.04	1.085	0.817594	0	95.9	104.1	1.49766e+07	1.24784e+07	3130		Light	High	Peak Found	High	-0.38	0.0001206	9.391e-06	3.37	36.7
	TRUE	High	[K].KHLEINPDHPIVETLR.[Q]	1xLabel:13C(6)15N(2) [K1]; 1xLabel:13C(6)15N(4) [R16]	0.000585911	0.00021741	1	1	3	P08238	P08238 [624-639]		1	1929.07								3130	Redundant	Heavy	Peak Found	High	High	-0.25	0.0002	0.0004629	3.02	36.7
	TRUE	High	[K].KHSQFIGYPITLYLEK.[E]		0.000262963	9.84928e-05	2	2	1	P08238; Q58FF7	P08238 [204-219]; Q58FF7 [183-198]		1	1937.05	1.131	0.775503	0	93.9	106.1	2.2127e+06	1.92145e+06	3135	Shared	Light	High	Peak Found	High	0.39	0.0001206	0.0002029	2.84	63.01
	TRUE	High	[K].IDIIPNPQER.[T]		0.00143322	0.000424254	2	2	1	P08238; Q58FF7	P08238 [73-82]; Q58FF7 [73-82]		0	1194.65	0.961	0.738643	0	102	98	44962020	33186960	3449	Shared	Light	High	Peak Found	High	0.19	0.0003475	0.001173	2.72	36.75
	TRUE	High	[K].IDIIPNPQER.[T]	1xLabel:13C(6)15N(4) [R10]	0.00158076	0.000424254	2	2	2	P08238; Q58FF7	P08238 [73-82]; Q58FF7 [73-82]		0	1204.66								3449	Redundant	Heavy	Peak Found	High	High	-0.19	0.0003475	0.001297	2.13	36.75
	TRUE	High	[K].LGLGIDEDEVAAEEPNAAVPDEIPPLEGDEDASR.[M]		4.01358e-06	9.84928e-05	1	1	2	P08238	P08238 [686-719]		0	3532.64								3729	Redundant	Light	High	Peak Found	High	-0.01	0.0001206	2.873e-06	4.88	69.71
	TRUE	High	[K].LGLGIDEDEVAAEEPNAAVPDEIPPLEGDEDASR.[M]	1xDeamidated [N16]	0.00289828	0.000632611	1	1	1	P08238	P08238 [686-719]		0	3533.63								3728	Redundant	Light	High	Not Found	High	4.22	0.0004992	0.002422	3.85
	TRUE	High	[K].LGLGIDEDEVAAEEPNAAVPDEIPPLEGDEDASR.[M]	1xLabel:13C(6)15N(4) [R34]	4.32616e-05	9.84928e-05	1	1	2	P08238	P08238 [686-719]		0	3542.65	0.769	0.132914	0	113.1	86.9	13740542	8.11603e+06	3729		Heavy	Peak Found	High	High	2.54	0.0001206	3.214e-05	5.06	69.71
	TRUE	High	[K].LGIHEDSTNR.[R]	1xLabel:13C(6)15N(4) [R10]	0.028578	0.00254153	1	1	1	P08238	P08238 [439-448]		0	1151.57	1.595	0.161861	0	77.1	122.9	25662.6	31425.2	3730		Heavy	Peak Found	High	High	0.39	0.002134	0.02146	1.8	12.55
	TRUE	High	[R].NPDDITQEEYGEFYK.[S]		1.88889e-07	9.84928e-05	1	1	2	P08238	P08238 [292-306]		0	1847.8	1.109	0.735069	0	94.8	105.2	28677260	24433482	5685		Light	High	Peak Found	High	0.45	0.0001206	1.278e-07	4.81	45.63
	TRUE	High	[R].NPDDITQEEYGEFYK.[S]	1xLabel:13C(6)15N(2) [K15]	6.6328e-07	9.84928e-05	1	1	3	P08238	P08238 [292-306]		0	1855.81								5685	Redundant	Heavy	Peak Found	High	High	0.49	0.0001206	4.603e-07	5.43	45.63
	TRUE	High	[R].RAPFDLFENK.[K]		0.00560727	0.000965695	2	2	2	P08238; Q58FF7	P08238 [338-347]; Q58FF7 [280-289]		1	1236.64	1.102	0.774696	0	95.1	104.9	13022960	11023173	6152	Shared	Light	High	Peak Found	High	1.52	0.0008827	0.004665	2.71	44.36
	TRUE	High	[R].RAPFDLFENK.[K]	1xLabel:13C(6)15N(2) [K10]; 1xLabel:13C(6)15N(4) [R1]	0.0509316	0.00397277	2	2	2	P08238; Q58FF7	P08238 [338-347]; Q58FF7 [280-289]		1	1254.66								6152	Redundant	Heavy	Peak Found	High	High	-0.15	0.003158	0.03746	2.68	44.36
	TRUE	High	[R].RAPFDLFENKK.[K]		0.00301677	0.000632611	2	2	1	P08238; Q58FF7	P08238 [338-348]; Q58FF7 [280-290]		2	1364.73	1.333	0.288519	0	85.7	114.3	5.13196e+06	5252474	6153	Shared	Light	High	Peak Found	High	-0.6	0.0004992	0.002522	2.81	33.81
	TRUE	High	[R].RAPFDLFENKK.[K]	2xLabel:13C(6)15N(2) [K10; K11]; 1xLabel:13C(6)15N(4) [R1]	0.0015101	0.000424254	2	2	2	P08238; Q58FF7	P08238 [338-348]; Q58FF7 [280-290]		2	1390.77								6153	Redundant	Heavy	Peak Found	High	High	0.35	0.0003475	0.001236	3.73	33.81
	TRUE	High	[K].SLTNDWEDHLAVK.[H]		0.000208366	9.84928e-05	2	2	3	P07900; P08238	P07900 [315-327]; P08238 [307-319]		0	1527.74	1.287	0.301588	0	87.5	112.5	44694887	44170032	6575	Shared	Light	High	Peak Found	High	-0.72	0.0001206	0.0001598	3.6	42.34
	TRUE	High	[K].SLTNDWEDHLAVK.[H]	1xLabel:13C(6)15N(2) [K13]	7.13743e-05	9.84928e-05	2	2	2	P07900; P08238	P07900 [315-327]; P08238 [307-319]		0	1535.76								6575	Redundant	Heavy	Peak Found	High	High	-0.9	0.0001206	5.344e-05	3.88	42.34
	TRUE	High	[K].SIYYITGESK.[E]		0.000374305	9.84928e-05	2	2	1	P08238; Q58FF8	P08238 [482-491]; Q58FF8 [258-267]		0	1160.58	1.298	0.283038	0	87	113	30003660	29908792	6591	Shared	Light	High	Peak Found	High	0	0.0001206	0.0002916	2.91	28.86
	TRUE	High	[K].SIYYITGESK.[E]	1xLabel:13C(6)15N(2) [K10]	0.000371788	9.84928e-05	2	2	2	P08238; Q58FF8	P08238 [482-491]; Q58FF8 [258-267]		0	1168.6								6591	Redundant	Heavy	Peak Found	High	High	-0.03	0.0001206	0.0002907	3.27	28.86
	TRUE	High	[K].TKPIWTRNPDDITQEEYGEFYK.[S]		9.68578e-05	9.84928e-05	1	1	2	P08238	P08238 [285-306]		1	2730.3	0.427	0.000347329	0	140.2	59.8	7.31205e+06	2.3955e+06	7114		Light	High	Peak Found	High	4.08	0.0001206	7.298e-05	3.82	52.35
	TRUE	High	[K].TKPIWTRNPDDITQEEYGEFYK.[S]	2xLabel:13C(6)15N(2) [K2; K22]; 1xLabel:13C(6)15N(4) [R7]	0.00589653	0.000965695	1	1	1	P08238	P08238 [285-306]		1	2756.34								7114	Redundant	Heavy	Peak Found	High	High	2.66	0.0008827	0.004898	2.78	52.31
	TRUE	High	[R].TLTIVDTGIGMTK.[A]		1.64306e-06	9.84928e-05	2	3	3	P07900; P08238	P07900 [88-100]; P08238 [83-95]		0	1349.73	2.051	0.00129814	0	65.5	134.5	30043999	47327648	7218	Shared	Light	High	Peak Found	High	0	0.0001206	1.152e-06	4.14	49.14
	TRUE	High	[R].TLTIVDTGIGMTK.[A]	1xLabel:13C(6)15N(2) [K13]	4.45639e-06	9.84928e-05	2	3	5	P07900; P08238	P07900 [88-100]; P08238 [83-95]		0	1357.75								7218	Redundant	Heavy	Peak Found	High	High	0.06	0.0001206	3.186e-06	3.56	49.14
	TRUE	High	[R].TLTLVDTGIGMTK.[A]	1xOxidation [M11]	2.05412e-06	9.84928e-05	1	1	4	P08238	P08238 [83-95]		0	1365.73	1.672	0.023917	0	74.9	125.1	2.07274e+07	2.66111e+07	7219		Light	High	Peak Found	High	0.02	0.0001206	1.447e-06	4.06	41.06
	TRUE	High	[R].TLTIVDTGIGMTK.[A]	1xOxidation [M11]; 1xLabel:13C(6)15N(2) [K13]	3.3477e-06	9.84928e-05	2	3	6	P07900; P08238	P07900 [88-100]; P08238 [83-95]		0	1373.74								7219	Redundant	Heavy	Peak Found	High	High	0.08	0.0001206	2.389e-06	3.75	41.06
	TRUE	High	[R].TLTLVDTGIGMTKADLINNLGTIAK.[S]		2.11226e-06	9.84928e-05	2	2	2	P07900; P08238	P07900 [88-112]; P08238 [83-107]		1	2573.42	0.788	0.486504	0	111.9	88.1	551811	333894	7221	Shared	Light	High	Peak Found	High	0.37	0.0001206	1.489e-06	4.31	72.55
	TRUE	High	[R].TLTLVDTGIGMTKADLINNLGTIAK.[S]	2xLabel:13C(6)15N(2) [K13; K25]	0.00216547	0.000424254	1	1	1	P08238	P08238 [83-107]		1	2589.45								7221	Redundant	Heavy	Peak Found	High	High	0.21	0.0003475	0.001803	3.8	72.55
	TRUE	High	[K].VILHLKEDQTEYLEER.[RW]		0.000408561	9.84928e-05	3	4	8	P07900; P08238; Q58FF7	P07900 [186-201]; P08238 [181-196]; Q58FF7 [160-175]		1	2015.04	1.19	0.513606	0	91.3	108.7	1.30684e+07	1.19466e+07	7888	Shared	Light	High	Peak Found	High	0.43	0.0001206	0.0003183	4.02	38.99
	TRUE	High	[K].VILHLKEDQTEYLEER.[RW]	1xLabel:13C(6)15N(2) [K6]; 1xLabel:13C(6)15N(4) [R16]	3.43807e-05	9.84928e-05	3	4	3	P07900; P08238; Q58FF7	P07900 [186-201]; P08238 [181-196]; Q58FF7 [160-175]		1	2033.07								7888	Redundant	Heavy	Peak Found	High	High	-0.41	0.0001206	2.538e-05	4.85	117.69
	TRUE	High	[K].VILHLKEDQTEYLEERR.[IV]		0.0241723	0.00211525	3	3	2	P07900; P08238; Q58FF7	P07900 [186-202]; P08238 [181-197]; Q58FF7 [160-176]		2	2171.15	1.293	0.439401	0	87.2	112.8	370008	367388	7889	Shared	Light	High	Peak Found	High	-0.02	0.001829	0.01832	3.09	118.12
	TRUE	High	[K].VILHLKEDQTEYLEERR.[IV]	1xLabel:13C(6)15N(2) [K6]; 2xLabel:13C(6)15N(4) [R16; R17]	0.000257632	9.84928e-05	3	3	1	P07900; P08238; Q58FF7	P07900 [186-202]; P08238 [181-197]; Q58FF7 [160-176]		2	2199.18								7889	Redundant	Heavy	Peak Found	High	High	-0.22	0.0001206	0.0001988	3.53	118.12
	TRUE	High	[R].YESLTDPSKLDSGK.[E]		0.00111061	0.000339819	4	4	2	P07900; P08238; Q58FF8; Q58FF7	P07900 [61-74]; P08238 [56-69]; Q58FF8 [56-69]; Q58FF7 [56-69]		1	1539.75	1.229	0.414534	0	89.7	110.3	49924831	47103470	8372	Shared	Light	High	Peak Found	High	-0.03	0.0002891	0.0009004	3.61	24.55
	TRUE	High	[R].YESLTDPSKLDSGK.[E]	2xLabel:13C(6)15N(2) [K9; K14]	0.00253753	0.000534724	4	4	3	P07900; P08238; Q58FF8; Q58FF7	P07900 [61-74]; P08238 [56-69]; Q58FF8 [56-69]; Q58FF7 [56-69]		1	1555.78								8372	Redundant	Heavy	Peak Found	High	High	0.24	0.0004281	0.00212	3.51	24.55
	TRUE	High	[R].YESLTDPSKLDSGKELK.[I]		0.0103844	0.00112166	3	3	1	P08238; Q58FF8; Q58FF7	P08238 [56-72]; Q58FF8 [56-72]; Q58FF7 [56-72]		2	1909.98								8373	No Quan Values	Light	High	Not Found	High	-0.05	0.00106	0.008357	3
	TRUE	High	[R].YHTSQSGDEMTSLSEYVSR.[M]		5.68711e-09	9.84928e-05	1	1	3	P08238	P08238 [457-475]		0	2176.95	1.338	0.224409	0	85.6	114.4	23549752	2.41948e+07	8430		Light	High	Peak Found	High	0.86	0.0001206	3.639e-09	5.26	41.77
	TRUE	High	[R].YHTSQSGDEMTSLSEYVSR.[M]	1xLabel:13C(6)15N(4) [R19]	5.416e-09	9.84928e-05	1	1	4	P08238	P08238 [457-475]		0	2186.95								8430	Redundant	Heavy	Peak Found	High	High	0.43	0.0001206	3.462e-09	5.4	41.77
	TRUE	High	[R].YHTSQSGDEMTSLSEYVSR.[M]	1xOxidation [M10]	4.30269e-08	9.84928e-05	1	1	3	P08238	P08238 [457-475]		0	2192.94								8429	Redundant	Light	High	Peak Found	High	-1.21	0.0001206	2.841e-08	3.84	29.66
	TRUE	High	[R].YHTSQSGDEMTSLSEYVSR.[M]	1xOxidation [M10]; 1xLabel:13C(6)15N(4) [R19]	1.26037e-06	9.84928e-05	1	1	4	P08238	P08238 [457-475]		0	2202.95	1.346	0.213511	0	85.2	114.8	1.58548e+07	1.63905e+07	8429		Heavy	Peak Found	High	High	0.56	0.0001206	8.847e-07	4.45	29.66
TRUE	High	Master Protein	P07437	Tubulin beta chain OS=Homo sapiens OX=9606 GN=TUBB PE=1 SV=2	0	315.767	55	18	141	5	444	49.6	4.89	487.45	18	Pf00091, Pf03953	203068	ENSG00000183311; ENSG00000196230; ENSG00000224156; ENSG00000227739; ENSG00000229684; ENSG00000232421; ENSG00000232575; ENSG00000235067	TUBB	hsa:203068; P05218; P07437; Q8WUC1; Q9CY33	Alzheimer's disease and miRNA effects; Pathogenic Escherichia coli infection; Parkin-ubiquitin proteasomal system pathway; Alzheimer's disease	Neutrophil degranulation; Recruitment of NuMA to mitotic centrosomes; Regulation of PLK1 Activity at G2/M Transition; Loss of Nlp from mitotic centrosomes; Recruitment of mitotic centrosome proteins and complexes; Anchoring of the basal body to the plasma membrane; AURKA Activation by TPX2; Potential therapeutics for SARS	Phagosome; Gap junction; Alzheimer disease; Parkinson disease; Amyotrophic lateral sclerosis; Huntington disease; Prion disease; Pathways of neurodegeneration; Pathogenic Escherichia coli infection; Salmonella infection	23	19	1.214	0.451646	15.86	91.4	108.6	7.32147e+08	6.67787e+08	High	High	1
	Checked	Confidence	Annotated Sequence	Modifications	Qvality PEP	Qvality q-value	# Protein Groups	# Proteins	# PSMs	Master Protein Accessions	Positions in Master Proteins	Modifications in Master Proteins	# Missed Cleavages	Theo. MH+ [Da]	Abundance Ratio: (Heavy) / (Light)	Abundance Ratio P-Value: (Heavy) / (Light)	Abundance Ratio Variability [%]: (Heavy) / (Light)	Abundances (Grouped): Light	Abundances (Grouped): Heavy	Abundance: F1: Light, Sample	Abundance: F1: Heavy, Sample	Precursor Quan Result ID	Quan Info	Quan Channel	Found in Sample: [S1] F1: Light, Sample	Found in Sample: [S3] F1: Heavy, Sample	Confidence (by Search Engine): Sequest HT	DeltaM [ppm] (by Search Engine): Sequest HT	Percolator q-Value (by Search Engine): Sequest HT	Percolator PEP (by Search Engine): Sequest HT	XCorr (by Search Engine): Sequest HT	Top Apex RT [min]
	TRUE	High	[R].AILVDLEPGTMDSVR.[S]		2.60382e-07	9.84928e-05	3	4	2	Q13509; P07437; Q9BVA1	Q13509 [63-77]; P07437 [63-77]; Q9BVA1 [63-77]		0	1615.84	1.161	0.580771	0	92.5	107.5	52017316	46390608	401	Shared	Light	High	Peak Found	High	-0.01	0.0001206	1.779e-07	3.93	57
	TRUE	High	[R].AILVDLEPGTMDSVR.[S]	1xLabel:13C(6)15N(4) [R15]	2.77259e-07	9.84928e-05	3	4	2	Q13509; P07437; Q9BVA1	Q13509 [63-77]; P07437 [63-77]; Q9BVA1 [63-77]		0	1625.84								401	Redundant	Heavy	Peak Found	High	High	-0.06	0.0001206	1.889e-07	4.18	57
	TRUE	High	[R].AILVDLEPGTMDSVR.[S]	1xOxidation [M11]	2.17179e-07	9.84928e-05	3	4	5	Q13509; P07437; Q9BVA1	Q13509 [63-77]; P07437 [63-77]; Q9BVA1 [63-77]		0	1631.83	1.214	0.44632	0	90.3	109.7	44353856	41364216	400	Shared	Light	High	Peak Found	High	-0.04	0.0001206	1.481e-07	3.99	48.7
	TRUE	High	[R].AILVDLEPGTMDSVR.[S]	1xOxidation [M11]; 1xLabel:13C(6)15N(4) [R15]	2.15669e-07	9.84928e-05	3	4	2	Q13509; P07437; Q9BVA1	Q13509 [63-77]; P07437 [63-77]; Q9BVA1 [63-77]		0	1641.84								400	Redundant	Heavy	Peak Found	High	High	0.13	0.0001206	1.466e-07	3.97	48.7
	TRUE	High	[R].ALTVPELTQQVFDAK.[N]		6.27074e-09	9.84928e-05	1	1	6	P07437	P07437 [283-297]		0	1659.9	1.192	0.498797	0	91.2	108.8	86951371	79628775	454		Light	High	Peak Found	High	-0.24	0.0001206	4.022e-09	4.66	64.09
	TRUE	High	[R].ALTVPELTQQVFDAK.[N]	1xLabel:13C(6)15N(2) [K15]	2.62205e-07	9.84928e-05	1	1	5	P07437	P07437 [283-297]		0	1667.91								454	Redundant	Heavy	Peak Found	High	High	0.18	0.0001206	1.784e-07	4.72	64.09
	TRUE	High	[R].EIVHIQAGQCGNQIGAK.[F]	1xCarbamidomethyl [C10]	1.77414e-06	9.84928e-05	4	6	2	Q13509; P07437; P68371; Q9BVA1	Q13509 [3-19]; P07437 [3-19]; P68371 [3-19]; Q9BVA1 [3-19]		0	1822.92	1.684	0.0398853	0	74.5	125.5	3.23641e+06	4.18464e+06	1875	Shared	Light	High	Peak Found	High	-0.43	0.0001206	1.246e-06	3.7	24.2
	TRUE	High	[R].EIVHLQAGQCGNQIGAK.[F]	1xCarbamidomethyl [C10]; 1xLabel:13C(6)15N(2) [K17]	0.000285384	9.84928e-05	4	6	2	Q13509; P07437; P68371; Q9BVA1	Q13509 [3-19]; P07437 [3-19]; P68371 [3-19]; Q9BVA1 [3-19]		0	1830.94								1875	Redundant	Heavy	Peak Found	High	High	-1.35	0.0001206	0.0002203	3.76
	TRUE	High	[K].EVDEQMLNVQNK.[N]		2.65919e-06	9.84928e-05	3	4	3	P07437; P68371; Q9BVA1	P07437 [325-336]; P68371 [325-336]; Q9BVA1 [325-336]		0	1446.69	1.347	0.212733	0	85.2	114.8	50393496	52119832	2088	Shared	Light	High	Peak Found	High	-0.15	0.0001206	1.885e-06	4.65	28.23
	TRUE	High	[K].EVDEQMLNVQNK.[N]	1xLabel:13C(6)15N(2) [K12]	1.6424e-05	9.84928e-05	3	4	3	P07437; P68371; Q9BVA1	P07437 [325-336]; P68371 [325-336]; Q9BVA1 [325-336]		0	1454.7								2088	Redundant	Heavy	Peak Found	High	High	0.16	0.0001206	1.204e-05	4.31	28.23
	TRUE	High	[K].EVDEQMLNVQNK.[N]	1xOxidation [M6]	0.000176684	9.84928e-05	3	4	9	P07437; P68371; Q9BVA1	P07437 [325-336]; P68371 [325-336]; Q9BVA1 [325-336]		0	1462.68	1.629	0.125727	0	76.1	123.9	773307	967422	2089	Shared	Light	High	Peak Found	High	-0.19	0.0001206	0.000135	3.25	21.55
	TRUE	High	[K].EVDEQMLNVQNK.[N]	1xOxidation [M6]; 1xLabel:13C(6)15N(2) [K12]	0.000252406	9.84928e-05	3	4	4	P07437; P68371; Q9BVA1	P07437 [325-336]; P68371 [325-336]; Q9BVA1 [325-336]		0	1470.7								2089	Redundant	Heavy	Peak Found	High	High	0.96	0.0001206	0.0001944	3.51	21.55
	TRUE	High	[R].FPGQLNADLRK.[L]		0.0154181	0.00146171	4	10	2	Q13509; P07437; P68371; Q9BVA1	Q13509 [242-252]; P07437 [242-252]; P68371 [242-252]; Q9BVA1 [242-252]		1	1258.69								2296	Redundant	Light	High	Peak Found	High	-0.62	0.001368	0.01206	2.71	26.14
	TRUE	High	[R].FPGQLNADLRK.[L]	1xLabel:13C(6)15N(2) [K11]; 1xLabel:13C(6)15N(4) [R10]	0.00276625	0.000632611	4	10	2	Q13509; P07437; P68371; Q9BVA1	Q13509 [242-252]; P07437 [242-252]; P68371 [242-252]; Q9BVA1 [242-252]		1	1276.71	1.222	0.446221	0	90	110	9515868	8932223	2296	Shared	Heavy	Peak Found	High	High	0.36	0.0004992	0.002315	1.85	26.14
	TRUE	High	[K].FWEVISDEHGIDPTGTYHGDSDLQLDR.[I]		0.000387141	9.84928e-05	1	1	1	P07437	P07437 [20-46]		0	3102.41	1.214	0.51062	0	90.3	109.7	5683661	5.29777e+06	2376		Light	High	Peak Found	High	-0.19	0.0001206	0.0003019	3.49	59.41
	TRUE	High	[K].FWEVISDEHGIDPTGTYHGDSDLQLDR.[I]	1xLabel:13C(6)15N(4) [R27]	6.08323e-05	9.84928e-05	1	1	3	P07437	P07437 [20-46]		0	3112.42								2376	Redundant	Heavy	Peak Found	High	High	0.17	0.0001206	4.548e-05	4.34	59.41
	TRUE	High	[K].GHYTEGAELVDSVLDVVR.[K]		1.63117e-08	9.84928e-05	4	5	4	Q13509; P07437; P68371; Q9BVA1	Q13509 [104-121]; P07437 [104-121]; P68371 [104-121]; Q9BVA1 [104-121]		0	1958.98	1.369	0.188706	0	84.4	115.6	9.21156e+06	9.68214e+06	2600	Shared	Light	High	Peak Found	High	-0.12	0.0001206	1.065e-08	4.68	71.8
	TRUE	High	[K].GHYTEGAELVDSVLDVVR.[K]	1xLabel:13C(6)15N(4) [R18]	9.39767e-10	9.84928e-05	4	5	3	Q13509; P07437; P68371; Q9BVA1	Q13509 [104-121]; P07437 [104-121]; P68371 [104-121]; Q9BVA1 [104-121]		0	1968.99								2600	Redundant	Heavy	Peak Found	High	High	0.45	0.0001206	5.86e-10	5.51	71.8
	TRUE	High	[K].GHYTEGAELVDSVLDVVRK.[E]		3.48944e-09	9.84928e-05	4	5	4	Q13509; P07437; P68371; Q9BVA1	Q13509 [104-122]; P07437 [104-122]; P68371 [104-122]; Q9BVA1 [104-122]		1	2087.08	1.37	0.184524	0	84.4	115.6	1.74903e+07	1.84046e+07	2601	Shared	Light	High	Peak Found	High	-0.04	0.0001206	2.215e-09	5.74	67.09
	TRUE	High	[K].GHYTEGAELVDSVLDVVRK.[E]	1xLabel:13C(6)15N(2) [K19]; 1xLabel:13C(6)15N(4) [R18]	7.26153e-08	9.84928e-05	4	5	5	Q13509; P07437; P68371; Q9BVA1	Q13509 [104-122]; P07437 [104-122]; P68371 [104-122]; Q9BVA1 [104-122]		1	2105.1								2601	Redundant	Heavy	Peak Found	High	High	-0.01	0.0001206	4.855e-08	4.3	67.09
	TRUE	High	[K].LAVNMVPFPR.[L]		3.25173e-05	9.84928e-05	4	10	2	Q13509; P07437; P68371; Q9BVA1	Q13509 [253-262]; P07437 [253-262]; P68371 [253-262]; Q9BVA1 [253-262]		0	1143.63								3399	Redundant	Light	High	Peak Found	High	0.04	0.0001206	2.404e-05	3.25	52.79
	TRUE	High	[K].LAVNMVPFPR.[L]	1xLabel:13C(6)15N(4) [R10]	1.4588e-05	9.84928e-05	4	10	2	Q13509; P07437; P68371; Q9BVA1	Q13509 [253-262]; P07437 [253-262]; P68371 [253-262]; Q9BVA1 [253-262]		0	1153.64	1.086	0.810047	0	95.9	104.1	56063932	46777856	3399	Shared	Heavy	Peak Found	High	High	0.18	0.0001206	1.065e-05	3.99	52.79
	TRUE	High	[K].LAVNMVPFPR.[L]	1xOxidation [M5]	5.04185e-05	9.84928e-05	4	10	2	Q13509; P07437; P68371; Q9BVA1	Q13509 [253-262]; P07437 [253-262]; P68371 [253-262]; Q9BVA1 [253-262]		0	1159.63	1.084	0.817592	0	96	104	49877290	41529618	3400	Shared	Light	High	Peak Found	High	0.2	0.0001206	3.755e-05	3.49	42.5
	TRUE	High	[K].LAVNMVPFPR.[L]	1xOxidation [M5]; 1xLabel:13C(6)15N(4) [R10]	1.90137e-05	9.84928e-05	4	10	2	Q13509; P07437; P68371; Q9BVA1	Q13509 [253-262]; P07437 [253-262]; P68371 [253-262]; Q9BVA1 [253-262]		0	1169.64								3400	Redundant	Heavy	Peak Found	High	High	-0.08	0.0001206	1.393e-05	3.34	42.5
	TRUE	High	[R].LHFFMPGFAPLTSR.[G]		8.06399e-07	9.84928e-05	3	8	3	P07437; P68371; Q9BVA1	P07437 [263-276]; P68371 [263-276]; Q9BVA1 [263-276]		0	1620.84	1.066	0.878654	0	96.8	103.2	1.7264e+07	1.41373e+07	3808	Shared	Light	High	Peak Found	High	-0.02	0.0001206	5.624e-07	3.72	69.54
	TRUE	High	[R].LHFFMPGFAPLTSR.[G]	1xLabel:13C(6)15N(4) [R14]	1.66615e-06	9.84928e-05	3	8	5	P07437; P68371; Q9BVA1	P07437 [263-276]; P68371 [263-276]; Q9BVA1 [263-276]		0	1630.84								3808	Redundant	Heavy	Peak Found	High	High	-0.28	0.0001206	1.173e-06	3.47	69.54
	TRUE	High	[R].LHFFMPGFAPLTSR.[G]	1xOxidation [M5]	9.27066e-06	9.84928e-05	3	8	6	P07437; P68371; Q9BVA1	P07437 [263-276]; P68371 [263-276]; Q9BVA1 [263-276]		0	1636.83	1.13	0.67175	0	93.9	106.1	2.20853e+07	1.91632e+07	3807	Shared	Light	High	Peak Found	High	0.03	0.0001206	6.691e-06	3.77	60.27
	TRUE	High	[R].LHFFMPGFAPLTSR.[G]	1xOxidation [M5]; 1xLabel:13C(6)15N(4) [R14]	3.74309e-06	9.84928e-05	3	8	3	P07437; P68371; Q9BVA1	P07437 [263-276]; P68371 [263-276]; Q9BVA1 [263-276]		0	1646.84								3807	Redundant	Heavy	Peak Found	High	High	-0.13	0.0001206	2.678e-06	4.14	60.27
	TRUE	High	[R].IMNTFSVVPSPK.[V]		2.0963e-05	9.84928e-05	3	4	3	Q13509; P07437; P68371	Q13509 [163-174]; P07437 [163-174]; P68371 [163-174]		0	1319.7	1.094	0.785925	0	95.5	104.5	73077896	61381864	4170	Shared	Light	High	Peak Found	High	0.1	0.0001206	1.543e-05	3.68	43.82
	TRUE	High	[R].IMNTFSVVPSPK.[V]	1xLabel:13C(6)15N(2) [K12]	8.70654e-06	9.84928e-05	3	4	1	Q13509; P07437; P68371	Q13509 [163-174]; P07437 [163-174]; P68371 [163-174]		0	1327.72								4170	Redundant	Heavy	Peak Found	High	High	0.07	0.0001206	6.284e-06	4.39	43.82
	TRUE	High	[R].IMNTFSVVPSPK.[V]	1xOxidation [M2]	2.31282e-06	9.84928e-05	3	4	4	Q13509; P07437; P68371	Q13509 [163-174]; P07437 [163-174]; P68371 [163-174]		0	1335.7	1.084	0.817907	0	96	104	4.40074e+07	3.6639e+07	4171	Shared	Light	High	Peak Found	High	-0.18	0.0001206	1.632e-06	3.35	36.33
	TRUE	High	[R].IMNTFSVVPSPK.[V]	1xOxidation [M2]; 1xLabel:13C(6)15N(2) [K12]	1.28671e-05	9.84928e-05	3	4	3	Q13509; P07437; P68371	Q13509 [163-174]; P07437 [163-174]; P68371 [163-174]		0	1343.71								4171	Redundant	Heavy	Peak Found	High	High	0.06	0.0001206	9.369e-06	4.12	36.33
	TRUE	High	[R].ISEQFTAMFR.[R]		0.000696024	0.00021741	4	6	1	Q13509; P07437; P68371; Q9BVA1	Q13509 [381-390]; P07437 [381-390]; P68371 [381-390]; Q9BVA1 [381-390]		0	1229.6	0.01	1e-17		200		4.04752e+06		4448	Shared	Light	High	Not Found	High	-0.33	0.0002	0.0005556	3.24	51.86
	TRUE	High	[R].ISEQFTAMFR.[R]	1xOxidation [M8]	0.000400399	9.84928e-05	4	6	1	Q13509; P07437; P68371; Q9BVA1	Q13509 [381-390]; P07437 [381-390]; P68371 [381-390]; Q9BVA1 [381-390]		0	1245.59	1.547	0.088717	0	78.5	121.5	5.12159e+06	6083780	4449	Shared	Light	High	Peak Found	High	-0.17	0.0001206	0.0003124	2.53	38.3
	TRUE	High	[R].ISEQFTAMFR.[R]	1xOxidation [M8]; 1xLabel:13C(6)15N(4) [R10]	0.000293262	9.84928e-05	4	6	1	Q13509; P07437; P68371; Q9BVA1	Q13509 [381-390]; P07437 [381-390]; P68371 [381-390]; Q9BVA1 [381-390]		0	1255.6								4449	Redundant	Heavy	Peak Found	High	High	1.61	0.0001206	0.0002277	2.73	38.3
	TRUE	High	[R].ISVYYNEATGGK.[Y]		3.16596e-06	9.84928e-05	1	1	1	P07437	P07437 [47-58]		0	1301.64	1.427	0.129158	0	82.4	117.6	51167244	56077108	4542		Light	High	Peak Found	High	-0.04	0.0001206	2.248e-06	3.54	25.79
	TRUE	High	[R].ISVYYNEATGGKYVPR.[A]		0.00031603	9.84928e-05	1	1	2	P07437	P07437 [47-62]		1	1816.92	1.254	0.362402	0	88.7	111.3	2.87288e+07	2.76599e+07	4543		Light	High	Peak Found	High	1	0.0001206	0.0002457	3.52	34.66
	TRUE	High	[R].ISVYYNEATGGKYVPR.[A]	1xLabel:13C(6)15N(2) [K12]; 1xLabel:13C(6)15N(4) [R16]	0.00152996	0.000424254	1	1	2	P07437	P07437 [47-62]		1	1834.95								4543	Redundant	Heavy	Peak Found	High	High	-0.14	0.0003475	0.001254	2.4	34.66
	TRUE	High	[K].MAVTFIGNSTAIQELFK.[R]	1xOxidation [M1]	0.000476644	0.00021741	1	1	1	P07437	P07437 [363-379]		0	1885.97								5007	No Quan Values	Light	High	Not Found	High	0.38	0.0002	0.0003736	3.29
	TRUE	High	[K].NSSYFVEWIPNNVK.[TV]		2.34532e-06	9.84928e-05	4	7	3	Q13509; P07437; P68371; Q9BVA1	Q13509 [337-350]; P07437 [337-350]; P68371 [337-350]; Q9BVA1 [337-350]		0	1696.83								5746	Redundant	Light	High	Peak Found	High	0.17	0.0001206	1.66e-06	4.07	62.76
	TRUE	High	[K].NSSYFVEWIPNNVK.[TV]	1xLabel:13C(6)15N(2) [K14]	1.56474e-06	9.84928e-05	4	7	2	Q13509; P07437; P68371; Q9BVA1	Q13509 [337-350]; P07437 [337-350]; P68371 [337-350]; Q9BVA1 [337-350]		0	1704.85	1.158	0.590034	0	92.7	107.3	47788028	42496376	5746	Shared	Heavy	Peak Found	High	High	-0.35	0.0001206	1.097e-06	3.99	62.76
	TRUE	High	[R].SGPFGQIFRPDNFVFGQSGAGNNWAK.[G]		1.16653e-10	9.84928e-05	3	5	5	P07437; P68371; Q9BVA1	P07437 [78-103]; P68371 [78-103]; Q9BVA1 [78-103]		0	2798.34								6444	Redundant	Light	High	Peak Found	High	0.58	0.0001206	6.991e-11	8.13	71.7
	TRUE	High	[R].SGPFGQIFRPDNFVFGQSGAGNNWAK.[G]	1xLabel:13C(6)15N(2) [K26]; 1xLabel:13C(6)15N(4) [R9]	3.55367e-13	9.84928e-05	3	5	4	P07437; P68371; Q9BVA1	P07437 [78-103]; P68371 [78-103]; Q9BVA1 [78-103]		0	2816.37	1.06	0.899145	0	97.1	102.9	4.42648e+07	3.60477e+07	6444	Shared	Heavy	Peak Found	High	High	0.67	0.000120642	1.94091e-13	8.9	71.7
	TRUE	High	[R].YLTVAAVFR.[G]		0.000205526	9.84928e-05	2	3	3	P07437; P68371	P07437 [310-318]; P68371 [310-318]		0	1039.59	1.501	0.0799355	0	80	120	9026074	10403497	8476	Shared	Light	High	Peak Found	High	0.04	0.0001206	0.0001572	2.25	52.77
	TRUE	High	[R].YLTVAAVFR.[G]	1xLabel:13C(6)15N(4) [R9]	0.000142689	9.84928e-05	2	3	3	P07437; P68371	P07437 [310-318]; P68371 [310-318]		0	1049.6								8476	Redundant	Heavy	Peak Found	High	High	-0.16	0.0001206	0.0001085	3.13	52.77
TRUE	High	Master Protein	P35579	Myosin-9 OS=Homo sapiens OX=9606 GN=MYH9 PE=1 SV=4	0	313.14	22	29	75	26	1960	226.4	5.6	286.23	29	Pf00063, Pf01576, Pf02736	4627	ENSG00000100345	MYH9	A8K6E4; hsa:4627; O60805; P35579; Q60FE2; Q86T83	Primary focal segmental glomerulosclerosis (FSGS); VEGFA-VEGFR2 signaling pathway; Nephrotic syndrome	Translocation of SLC2A4 (GLUT4) to the plasma membrane; FCGR3A-mediated phagocytosis; EPHA-mediated growth cone collapse; Signaling by ALK fusions and activated point mutants; Sensory processing of sound by inner hair cells of the cochlea; Sensory processing of sound by outer hair cells of the cochlea; Regulation of actin dynamics for phagocytic cup formation; RHO GTPases activate CIT; Sema4D ind…	Vascular smooth muscle contraction; Tight junction; Regulation of actin cytoskeleton; Pathogenic Escherichia coli infection	20	3	1.012	0.967697	12.41	99.1	100.9	7.99124e+07	6.25464e+07	High	High	1	Met-loss+Acetyl [N-Term]
	Checked	Confidence	Annotated Sequence	Modifications	Qvality PEP	Qvality q-value	# Protein Groups	# Proteins	# PSMs	Master Protein Accessions	Positions in Master Proteins	Modifications in Master Proteins	# Missed Cleavages	Theo. MH+ [Da]	Abundance Ratio: (Heavy) / (Light)	Abundance Ratio P-Value: (Heavy) / (Light)	Abundance Ratio Variability [%]: (Heavy) / (Light)	Abundances (Grouped): Light	Abundances (Grouped): Heavy	Abundance: F1: Light, Sample	Abundance: F1: Heavy, Sample	Precursor Quan Result ID	Quan Info	Quan Channel	Found in Sample: [S1] F1: Light, Sample	Found in Sample: [S3] F1: Heavy, Sample	Confidence (by Search Engine): Sequest HT	DeltaM [ppm] (by Search Engine): Sequest HT	Percolator q-Value (by Search Engine): Sequest HT	Percolator PEP (by Search Engine): Sequest HT	XCorr (by Search Engine): Sequest HT	Top Apex RT [min]
	TRUE	High	[R].ALEQQVEEMK.[T]		0.00130795	0.000339819	1	1	1	P35579	P35579 [1529-1538]		0	1204.59	1.089	0.831263	0	95.7	104.3	3829292	3202044	355		Light	High	Peak Found	High	-0.52	0.0002891	0.001067	2.39	25.25
	TRUE	High	[R].ALEQQVEEMK.[T]	1xLabel:13C(6)15N(2) [K10]	0.00231311	0.000424254	1	1	1	P35579	P35579 [1529-1538]		0	1212.6								355	Redundant	Heavy	Peak Found	High	High	0.87	0.0003475	0.001926	2.65	25.25
	TRUE	High	[K].ANLQIDQINTDLNLER.[S]		7.41625e-07	9.84928e-05	1	1	1	P35579	P35579 [1755-1770]		0	1869.97								517	No Quan Values	Light	High	Not Found	High	-1.98	0.0001206	5.144e-07	3.81
	TRUE	High	[K].ANLQIDQINTDLNLER.[S]	1xLabel:13C(6)15N(4) [R16]	9.20622e-06	9.84928e-05	1	1	1	P35579	P35579 [1755-1770]		0	1879.97								517	Redundant	Heavy	Not Found	High	High	3.44	0.0001206	6.687e-06	3.64
	TRUE	High	[R].DELADEIANSSGK.[G]		0.0111515	0.00112166	1	1	1	P35579	P35579 [1704-1716]		0	1348.62	0.99	0.843212	0	100.5	99.5	4758626	3617912	947		Light	High	Peak Found	High	-0.33	0.00106	0.00893	2.15	33.34
	TRUE	High	[K].DFSALESQLQDTQELLQEENR.[Q]		4.39439e-07	9.84928e-05	1	1	2	P35579	P35579 [1302-1322]		0	2493.17	0.991	0.862301	0	100.5	99.5	3.11342e+06	2.36912e+06	993		Light	High	Peak Found	High	-0.01	0.0001206	3.033e-07	4.38	78.12
	TRUE	High	[K].DFSALESQLQDTQELLQEENR.[Q]	1xLabel:13C(6)15N(4) [R21]	2.17205e-06	9.84928e-05	1	1	2	P35579	P35579 [1302-1322]		0	2503.18								993	Redundant	Heavy	Peak Found	High	High	0.57	0.0001206	1.53e-06	4.13	78.12
	TRUE	High	[R].DLGEELEALK.[T]	1xLabel:13C(6)15N(2) [K10]	0.00493539	0.000910608	2	2	1	P35749; P35579	P35749 [1143-1152]; P35579 [1136-1145]		0	1124.59	0.924	0.678052	0	104	96	3.93324e+06	2.78986e+06	1110	Shared	Heavy	Peak Found	High	High	-0.02	0.0008524	0.00412	2.02	54.71
	TRUE	High	[R].ELEDATETADAMNR.[E]		6.86813e-06	9.84928e-05	1	1	2	P35579	P35579 [1899-1912]		0	1565.67	0.854	0.459147	0	107.9	92.1	3.94857e+06	2.58971e+06	1775		Light	High	Peak Found	High	1.22	0.0001206	4.964e-06	3.55	26.8
	TRUE	High	[R].ELESQISELQEDLESER.[A]		5.93121e-08	9.84928e-05	1	1	1	P35579	P35579 [1108-1124]		0	2033.95	1.25	0.537565	0	88.9	111.1	2.60528e+06	2501756	1795		Light	High	Peak Found	High	0.71	0.0001206	3.954e-08	4.76	63.37
	TRUE	High	[R].ELESQISELQEDLESER.[A]	1xLabel:13C(6)15N(4) [R17]	2.75331e-07	9.84928e-05	1	1	1	P35579	P35579 [1108-1124]		0	2043.96								1795	Redundant	Heavy	Peak Found	High	High	-1.78	0.0001206	1.881e-07	5.12	63.37
	TRUE	High	[K].HSQAVEELAEQLEQTKR.[V]		0.0262841	0.0021999	1	1	1	P35579	P35579 [1194-1210]		1	1996.01	1.01	0.987805	0	99.5	100.5	2.08218e+06	1.61583e+06	3050		Light	High	Peak Found	High	0.85	0.001829	0.01975	2.91	45.69
	TRUE	High	[R].KKVEAQLQELQVK.[F]		0.00930777	0.00112166	1	1	1	P35579	P35579 [1248-1260]		2	1540.91	1.49	0.205745	0	80.3	119.7	2.03874e+06	2.33272e+06	3141		Light	High	Peak Found	High	-0.12	0.00106	0.007574	2.7	21.49
	TRUE	High	[R].IAEFTTNLTEEEEK.[S]		4.01358e-06	9.84928e-05	1	1	2	P35579	P35579 [1001-1014]		0	1653.79								3286	Redundant	Light	High	Peak Found	High	0.44	0.0001206	2.87e-06	4.38	38.63
	TRUE	High	[R].IAEFTTNLTEEEEK.[S]	1xLabel:13C(6)15N(2) [K14]	7.08803e-05	9.84928e-05	1	1	1	P35579	P35579 [1001-1014]		0	1661.8	1.027	0.98241	0	98.7	101.3	8103137	6.38975e+06	3286		Heavy	Peak Found	High	High	-1.27	0.0001206	5.328e-05	3.02	38.63
	TRUE	High	[R].IAQLEEELEEEQGNTELINDR.[L]		2.09732e-07	9.84928e-05	1	1	2	P35579	P35579 [1731-1751]		0	2472.17	0.923	0.650267	0	104	96	5.63928e+06	3.99522e+06	3354		Light	High	Peak Found	High	-1.29	0.0001206	1.424e-07	5.55	56.8
	TRUE	High	[R].IAQLEEELEEEQGNTELINDR.[L]	1xLabel:13C(6)15N(4) [R21]	1.30494e-07	9.84928e-05	1	1	2	P35579	P35579 [1731-1751]		0	2482.18								3354	Redundant	Heavy	Peak Found	High	High	-0.78	0.0001206	8.827e-08	5.58	56.8
	TRUE	High	[K].IAQLEEQLDNETK.[E]		9.14223e-06	9.84928e-05	1	1	1	P35579	P35579 [1816-1828]		0	1530.76	1.024	0.980419	0	98.8	101.2	8.28075e+06	6512153	3355		Light	High	Peak Found	High	1.17	0.0001206	6.595e-06	3.7	32.66
	TRUE	High	[K].IAQLEEQLDNETK.[E]	1xLabel:13C(6)15N(2) [K13]	1.42905e-06	9.84928e-05	1	1	2	P35579	P35579 [1816-1828]		0	1538.78								3355	Redundant	Heavy	Peak Found	High	High	0.11	0.0001206	1.005e-06	4.03	32.66
	TRUE	High	[K].LEGDSTDLSDQIAELQAQIAELK.[M]		2.03865e-05	9.84928e-05	1	1	1	P35579	P35579 [1053-1075]		0	2487.25	1.082	0.836877	0	96.1	103.9	132215	109882	3521		Light	High	Peak Found	High	0.84	0.0001206	1.5e-05	4.54	85.56
	TRUE	High	[K].LEGDSTDLSDQIAELQAQIAELK.[M]	1xLabel:13C(6)15N(2) [K23]	0.055663	0.0041218	1	1	2	P35579	P35579 [1053-1075]		0	2495.26								3521	Redundant	Heavy	Peak Found	High	High	0.97	0.003203	0.04071	2.83	85.56
	TRUE	High	[R].IIGLDQVAGMSETALPGAFK.[T]		1.65389e-05	9.84928e-05	1	1	1	P35579	P35579 [618-637]		0	2018.06	1.014	0.978351	0	99.3	100.7	404215	314823	3973		Light	High	Peak Found	High	2.71	0.0001206	1.21e-05	3.17	72.39
	TRUE	High	[R].IIGLDQVAGMSETALPGAFK.[T]	1xOxidation [M10]	0.00376884	0.00071665	1	1	1	P35579	P35579 [618-637]		0	2034.06	100	1e-17			200		1.00394e+06	3974		Light	High	Peak Found	High	-1.96	0.0007168	0.003148	2.76	63.51
	TRUE	High	[R].LQQELDDLLVDLDHQR.[Q]		9.20622e-06	9.84928e-05	1	1	1	P35579	P35579 [1418-1433]		0	1949.99	0.833	0.45882	0	109.1	90.9	2.85861e+06	1.82908e+06	4372		Light	High	Peak Found	High	0.55	0.0001206	6.645e-06	3.77	66.92
	TRUE	High	[R].LQQELDDLLVDLDHQR.[Q]	1xLabel:13C(6)15N(4) [R16]	0.00204094	0.000424254	1	1	1	P35579	P35579 [1418-1433]		0	1960								4372	Redundant	Heavy	Peak Found	High	High	0.6	0.0003475	0.00169	2.32	66.92
	TRUE	High	[K].LQVELDNVTGLLSQSDSK.[S]		1.14291e-07	9.84928e-05	1	1	1	P35579	P35579 [1278-1295]		0	1946.01	0.01	1e-17		200		3.01843e+06		4395		Light	High	Not Found	High	-0.71	0.0001206	7.703e-08	4.72	63.55
	TRUE	High	[R].LTEMETLQSQLMAEK.[L]	1xOxidation [M12]	0.0028409	0.000632611	1	1	1	P35579	P35579 [868-882]		0	1767.85								4572	No Quan Values	Light	High	Not Found	High	3.18	0.0004992	0.002369	3.44
	TRUE	High	[-].MAQQAADKYLYVDKNFINNPLAQADWAAK.[K]	1xMet-loss+Acetyl [N-Term]	0.00382058	0.00071665	1	1	1	P35579	P35579 [1-29]	P35579 1xMet-loss+Acetyl [N-Term]	2	3208.61								4959	No Quan Values	Light	High	Not Found	High	0.22	0.0007168	0.003203	4.1
	TRUE	High	[K].MQQNIQELEEQLEEEESAR.[Q]		3.98539e-07	9.84928e-05	1	1	2	P35579	P35579 [941-959]		0	2333.06								5264	No Quan Values	Light	High	Not Found	High	2.2	0.0001206	2.735e-07	4.96
	TRUE	High	[K].MQQNIQELEEQLEEEESAR.[Q]	1xLabel:13C(6)15N(4) [R19]	0.000139764	9.84928e-05	1	1	1	P35579	P35579 [941-959]		0	2343.06								5264	Redundant	Heavy	Not Found	High	High	-0.92	0.0001206	0.0001059	4.24
	TRUE	High	[K].MQQNIQELEEQLEEEESAR.[Q]	1xOxidation [M1]	1.26888e-05	9.84928e-05	1	1	1	P35579	P35579 [941-959]		0	2349.05								5265	No Quan Values	Light	High	Not Found	High	-0.63	0.0001206	9.204e-06	3.79
	TRUE	High	[K].NFINNPLAQADWAAK.[K]		0.00285989	0.000632611	1	1	1	P35579	P35579 [15-29]		0	1672.84	0.751	0.330047	0	114.2	85.8	1.82601e+06	1052820	5526		Light	High	Peak Found	High	-1.1	0.0004992	0.00239	3.2	59.94
	TRUE	High	[K].NFINNPLAQADWAAK.[K]	1xLabel:13C(6)15N(2) [K15]	7.06249e-06	9.84928e-05	1	1	1	P35579	P35579 [15-29]		0	1680.86								5526	Redundant	Heavy	Peak Found	High	High	-0.23	0.0001206	5.08e-06	4.54	59.94
	TRUE	High	[K].NKHEAMITDLEER.[L]		0.0969591	0.00675767	1	1	1	P35579	P35579 [1023-1035]		1	1585.76								5578	No Quan Values	Light	High	Not Found	High	-0.4	0.005216	0.0708	2.54
	TRUE	High	[K].QIATLHAQVADMK.[K]		0.025632	0.00211525	1	1	1	P35579	P35579 [1358-1370]		0	1425.75								5952	No Quan Values	Light	High	Not Found	High	-0.11	0.001829	0.01933	1.7
	TRUE	High	[KR].QLLQANPILEAFGNAK.[T]		4.63797e-05	9.84928e-05	2	3	2	P35749; P35579	P35749 [217-232]; P35579 [210-225]		0	1726.95	0.915	0.614098	0	104.5	95.5	7.50567e+06	5.27213e+06	5982	Shared	Light	High	Peak Found	High	-0.37	0.0001206	3.459e-05	3.2	70.05
	TRUE	High	[KR].QLLQANPILEAFGNAK.[T]	1xLabel:13C(6)15N(2) [K16]	0.000733804	0.00021741	2	3	2	P35749; P35579	P35749 [217-232]; P35579 [210-225]		0	1734.96								5982	Redundant	Heavy	Peak Found	High	High	0.47	0.0002	0.0005852	2.8	70.05
	TRUE	High	[R].RGDLPFVVPR.[R]		0.00231311	0.000424254	1	1	1	P35579	P35579 [1923-1932]		1	1155.66								6173	No Quan Values	Light	High	Not Found	High	-0.35	0.0003475	0.001926	2.39
	TRUE	High	[K].TELEDTLDSTAAQQELR.[S]		3.51443e-08	9.84928e-05	1	1	2	P35579	P35579 [1146-1162]		0	1919.92	1.319	0.3126	0	86.2	113.8	3.26968e+06	3.31192e+06	7018		Light	High	Peak Found	High	-0.08	0.0001206	2.323e-08	5.11	45.52
	TRUE	High	[K].TELEDTLDSTAAQQELR.[S]	1xLabel:13C(6)15N(4) [R17]	2.34432e-09	9.84928e-05	1	1	1	P35579	P35579 [1146-1162]		0	1929.93								7018	Redundant	Heavy	Peak Found	High	High	0.06	0.0001206	1.484e-09	4.76	45.52
	TRUE	High	[RK].TQLEELEDELQATEDAK.[L]		1.17542e-06	9.84928e-05	3	3	2	P35580; P35749; P35579	P35580 [1546-1562]; P35749 [1546-1562]; P35579 [1539-1555]		0	1961.92								7324	Redundant	Light	High	Peak Found	High	1.64	0.0001206	8.243e-07	4.28	62.81
	TRUE	High	[RK].TQLEELEDELQATEDAK.[L]	1xLabel:13C(6)15N(2) [K17]	7.1111e-08	9.84928e-05	3	3	1	P35580; P35749; P35579	P35580 [1546-1562]; P35749 [1546-1562]; P35579 [1539-1555]		0	1969.93	1.033	0.996946	0	98.4	101.6	4.76631e+06	3.78196e+06	7324	Shared	Heavy	Peak Found	High	High	-0.86	0.0001206	4.752e-08	5.4	62.81
	TRUE	High	[K].VEAQLQELQVK.[F]		0.000289297	9.84928e-05	1	1	1	P35579	P35579 [1250-1260]		0	1284.72	1.33	0.306771	0	85.8	114.2	4559037	4656444	7620		Light	High	Peak Found	High	-0.54	0.0001206	0.0002235	3.31	32.87
	TRUE	High	[K].VEAQLQELQVK.[F]	1xLabel:13C(6)15N(2) [K11]	0.000322531	9.84928e-05	1	1	1	P35579	P35579 [1250-1260]		0	1292.73								7620	Redundant	Heavy	Peak Found	High	High	0.19	0.0001206	0.000251	3.08	32.87
	TRUE	High	[K].VSHLLGINVTDFTR.[G]		6.4759e-05	9.84928e-05	1	1	1	P35579	P35579 [374-387]		0	1571.85								8114	Redundant	Light	High	Not Found	High	0.23	0.0001206	4.863e-05	3.04
	TRUE	High	[K].VSHLLGINVTDFTR.[G]	1xLabel:13C(6)15N(4) [R14]	2.17065e-05	9.84928e-05	1	1	1	P35579	P35579 [374-387]		0	1581.86								8114	No Quan Values	Heavy	Not Found	High	High	-0.17	0.0001206	1.599e-05	3.25
	TRUE	High	[R].YEILTPNSIPK.[G]		0.0106333	0.00112166	1	1	1	P35579	P35579 [721-731]		0	1274.7	0.932	0.709216	0	103.5	96.5	3239715	2.31781e+06	8364		Light	High	Peak Found	High	0.21	0.00106	0.008552	2.37	43.51
	TRUE	High	[R].YEILTPNSIPK.[G]	1xLabel:13C(6)15N(2) [K11]	0.0360857	0.00302689	1	1	1	P35579	P35579 [721-731]		0	1282.71								8364	Redundant	Heavy	Peak Found	High	High	1.71	0.00248	0.02673	2.43	43.51
TRUE	High	Master Protein	Q9UQ35	Serine/arginine repetitive matrix protein 2 OS=Homo sapiens OX=9606 GN=SRRM2 PE=1 SV=2	0	310.534	15	23	83	23	2752	299.4	12.06	310.6	23	Pf08312	23524	ENSG00000167978	SRRM2	A6NKB9; D3DU97; hsa:23524; O15038; O94803; Q6NSL3; Q6PIM3; Q6PK40; Q8IW17; Q96GY7; Q9P0G1; Q9UHA8; Q9UQ35; Q9UQ36; Q9UQ37; Q9UQ38; Q9UQ40		mRNA Splicing - Major Pathway		1	0	0.896	0.662489	22.9	109	91	1.54282e+08	9.88292e+07	High	High	1
	Checked	Confidence	Annotated Sequence	Modifications	Qvality PEP	Qvality q-value	# Protein Groups	# Proteins	# PSMs	Master Protein Accessions	Positions in Master Proteins	Modifications in Master Proteins	# Missed Cleavages	Theo. MH+ [Da]	Abundance Ratio: (Heavy) / (Light)	Abundance Ratio P-Value: (Heavy) / (Light)	Abundance Ratio Variability [%]: (Heavy) / (Light)	Abundances (Grouped): Light	Abundances (Grouped): Heavy	Abundance: F1: Light, Sample	Abundance: F1: Heavy, Sample	Precursor Quan Result ID	Quan Info	Quan Channel	Found in Sample: [S1] F1: Light, Sample	Found in Sample: [S3] F1: Heavy, Sample	Confidence (by Search Engine): Sequest HT	DeltaM [ppm] (by Search Engine): Sequest HT	Percolator q-Value (by Search Engine): Sequest HT	Percolator PEP (by Search Engine): Sequest HT	XCorr (by Search Engine): Sequest HT	Top Apex RT [min]
	TRUE	High	[R].AAFGISDSYVDGSSFDPQR.[R]		0.00124131	0.000339819	1	1	1	Q9UQ35	Q9UQ35 [137-155]		0	2018.91								36	No Quan Values	Light	High	Not Found	High	-0.3	0.0002891	0.001011	2.51
	TRUE	High	[R].AAFGISDSYVDGSSFDPQR.[R]	1xLabel:13C(6)15N(4) [R19]	0.000257632	9.84928e-05	1	1	1	Q9UQ35	Q9UQ35 [137-155]		0	2028.92								36	Redundant	Heavy	Not Found	High	High	-1.18	0.0001206	0.0001989	3.78
	TRUE	High	[K].AGMSSNQSISSPVLDAVPR.[T]		6.70485e-05	9.84928e-05	1	1	1	Q9UQ35	Q9UQ35 [1394-1412]		0	1915.95								273	No Quan Values	Light	High	Not Found	High	-0.47	0.0001206	5.034e-05	3.22
	TRUE	High	[K].AGMSSNQSISSPVLDAVPR.[T]	1xLabel:13C(6)15N(4) [R19]	7.54518e-05	9.84928e-05	1	1	1	Q9UQ35	Q9UQ35 [1394-1412]		0	1925.96								273	Redundant	Heavy	Not Found	High	High	0.31	0.0001206	5.681e-05	3.91
	TRUE	High	[K].AGMSSNQSISSPVLDAVPR.[T]	1xOxidation [M3]	4.45639e-06	9.84928e-05	1	1	1	Q9UQ35	Q9UQ35 [1394-1412]		0	1931.95	0.878	0.552947	0	106.5	93.5	2835240	1.91102e+06	272		Light	High	Peak Found	High	-0.08	0.0001206	3.189e-06	5.12	42.55
	TRUE	High	[K].AGMSSNQSISSPVLDAVPR.[T]	1xOxidation [M3]; 1xLabel:13C(6)15N(4) [R19]	2.08241e-08	9.84928e-05	1	1	1	Q9UQ35	Q9UQ35 [1394-1412]		0	1941.96								272	Redundant	Heavy	Peak Found	High	High	2.14	0.0001206	1.359e-08	4.82	42.55
	TRUE	High	[K].DKFSPFPVQDRPESSLVFK.[D]	2xLabel:13C(6)15N(2) [K2; K19]; 1xLabel:13C(6)15N(4) [R11]	0.129568	0.00934995	1	1	1	Q9UQ35	Q9UQ35 [1185-1203]		1	2249.18	0.746	0.250963	0	114.5	85.5	3.6273e+06	2.07852e+06	1066		Heavy	Peak Found	High	High	-0.09	0.007205	0.09548	2.47	54.11
	TRUE	High	[K].DVNPGGKEETPGQRPAVTETHQLAELNEK.[K]		0.000162669	9.84928e-05	1	1	1	Q9UQ35	Q9UQ35 [102-130]		1	3144.56								1382	No Quan Values	Light	High	Not Found	High	-0.08	0.0001206	0.0001244	2.78
	TRUE	High	[K].EDLNGPFLNQLETDPSLDMK.[E]		6.70485e-05	9.84928e-05	1	1	1	Q9UQ35	Q9UQ35 [1353-1372]		0	2276.08								1554	No Quan Values	Light	High	Not Found	High	-0.8	0.0001206	5.01e-05	4.52
	TRUE	High	[K].EDLNGPFLNQLETDPSLDMK.[E]	1xLabel:13C(6)15N(2) [K20]	0.133118	0.00972745	1	1	1	Q9UQ35	Q9UQ35 [1353-1372]		0	2284.09								1554	Redundant	Heavy	Not Found	High	High	-1.77	0.007369	0.09816	3.45
	TRUE	High	[K].EDLNGPFLNQLETDPSLDMK.[E]	1xOxidation [M19]	0.000342817	9.84928e-05	1	1	1	Q9UQ35	Q9UQ35 [1353-1372]		0	2292.07								1551	No Quan Values	Light	High	Not Found	High	0.78	0.0001206	0.0002671	3.16
	TRUE	High	[K].EETPGQRPAVTETHQLAELNEK.[K]		1.72455e-05	9.84928e-05	1	1	1	Q9UQ35	Q9UQ35 [109-130]		0	2477.23								1655	No Quan Values	Light	High	Not Found	High	-3.2	0.0001206	1.265e-05	5.13
	TRUE	High	[K].EETPGQRPAVTETHQLAELNEK.[K]	1xLabel:13C(6)15N(2) [K22]; 1xLabel:13C(6)15N(4) [R7]	4.4483e-05	9.84928e-05	1	1	1	Q9UQ35	Q9UQ35 [109-130]		0	2495.25								1655	Redundant	Heavy	Not Found	High	High	-0.51	0.0001206	3.312e-05	3.61
	TRUE	High	[K].EQNSALPTSSQDEELMEVVEK.[S]		1.01506e-05	9.84928e-05	1	1	1	Q9UQ35	Q9UQ35 [1224-1244]		0	2363.09								1981	No Quan Values	Light	High	Not Found	High	0.58	0.0001206	7.375e-06	3.87
	TRUE	High	[K].EQNSALPTSSQDEELMEVVEK.[S]	1xLabel:13C(6)15N(2) [K21]	0.00142389	0.000424254	1	1	1	Q9UQ35	Q9UQ35 [1224-1244]		0	2371.11								1981	Redundant	Heavy	Not Found	High	High	1.18	0.0003475	0.00117	3.26
	TRUE	High	[R].FQSDSSSYPTVDSNSLLGQSR.[L]		5.53057e-09	9.84928e-05	1	1	3	Q9UQ35	Q9UQ35 [1138-1158]		0	2275.05	1.051	0.958129	0	97.5	102.5	8566930	6917481	2312		Light	High	Peak Found	High	1.15	0.0001206	3.543e-09	4.43	46.36
	TRUE	High	[R].FQSDSSSYPTVDSNSLLGQSR.[L]	1xLabel:13C(6)15N(4) [R21]	1.8886e-08	9.84928e-05	1	1	3	Q9UQ35	Q9UQ35 [1138-1158]		0	2285.06								2312	Redundant	Heavy	Peak Found	High	High	1.27	0.0001206	1.237e-08	5.23	46.36
	TRUE	High	[R].GEGDAPFSEPGTTSTQRPSSPETATK.[Q]		1.23426e-06	9.84928e-05	1	1	1	Q9UQ35	Q9UQ35 [304-329]		0	2635.21	0.681	0.137209	0	119	81	3.83196e+06	2.00338e+06	2491		Light	High	Peak Found	High	-0.21	0.0001206	8.627e-07	3.18	24.9
	TRUE	High	[R].GEGDAPFSEPGTTSTQRPSSPETATK.[Q]	1xLabel:13C(6)15N(2) [K26]; 1xLabel:13C(6)15N(4) [R17]	0.00212311	0.000424254	1	1	1	Q9UQ35	Q9UQ35 [304-329]		0	2653.23								2491	Redundant	Heavy	Peak Found	High	High	0.44	0.0003475	0.001767	2.69	24.9
	TRUE	High	[R].HGGSPQPLATTPLSQEPVNPPSEASPTR.[D]		1.47935e-08	9.84928e-05	1	1	2	Q9UQ35	Q9UQ35 [374-401]		0	2852.42	0.291	9.64247e-06	0	154.9	45.1	4.82282e+06	1.07847e+06	3007		Light	High	Peak Found	High	0.29	0.0001206	9.652e-09	5.46	38.79
	TRUE	High	[R].HGGSPQPLATTPLSQEPVNPPSEASPTR.[D]	1xLabel:13C(6)15N(4) [R28]	8.06345e-06	9.84928e-05	1	1	1	Q9UQ35	Q9UQ35 [374-401]		0	2862.43								3007	Redundant	Heavy	Peak Found	High	High	2.82	0.0001206	5.811e-06	4.34	38.79
	TRUE	High	[R].IPAASAAAMNLASAR.[T]	1xLabel:13C(6)15N(4) [R15]	3.03615e-06	9.84928e-05	1	1	1	Q9UQ35	Q9UQ35 [2232-2246]		0	1424.76	0.976	0.828546	0	101.2	98.8	4.43875e+06	3326212	4254		Heavy	Peak Found	High	High	0.92	0.0001206	2.162e-06	3.91	38.89
	TRUE	High	[R].IPAASAAAMNLASAR.[T]	1xOxidation [M9]	2.14195e-06	9.84928e-05	1	1	1	Q9UQ35	Q9UQ35 [2232-2246]		0	1430.74								4255	Redundant	Light	High	Peak Found	High	3.04	0.0001206	1.51e-06	3.52	30.32
	TRUE	High	[R].IPAASAAAMNLASAR.[T]	1xOxidation [M9]; 1xLabel:13C(6)15N(4) [R15]	1.05109e-05	9.84928e-05	1	1	1	Q9UQ35	Q9UQ35 [2232-2246]		0	1440.75	0.949	0.729395	0	102.6	97.4	4663964	3.40011e+06	4255		Heavy	Peak Found	High	High	2.45	0.0001206	7.602e-06	3.61	30.32
	TRUE	High	[R].MAPALSGANLTSPR.[V]	1xLabel:13C(6)15N(4) [R14]	0.0143208	0.00137984	1	1	1	Q9UQ35	Q9UQ35 [2371-2384]		0	1395.73	0.789	0.268216	0	111.8	88.2	8556999	5.18468e+06	4948		Heavy	Peak Found	High	High	0.35	0.001311	0.01126	2.32	33.14
	TRUE	High	[R].MAPALSGANLTSPR.[V]	1xOxidation [M1]	0.000133167	9.84928e-05	1	1	1	Q9UQ35	Q9UQ35 [2371-2384]		0	1401.72								4947	Redundant	Light	High	Peak Found	High	1.2	0.0001206	0.0001009	2.94	28.17
	TRUE	High	[R].MAPALSGANLTSPR.[V]	1xOxidation [M1]; 1xLabel:13C(6)15N(4) [R14]	4.87948e-06	9.84928e-05	1	1	1	Q9UQ35	Q9UQ35 [2371-2384]		0	1411.72	1.085	0.899724	0	95.9	104.1	3.44349e+06	2.87013e+06	4947		Heavy	Peak Found	High	High	1.3	0.0001206	3.487e-06	3.09	28.17
	TRUE	High	[R].MGQAPSQSLLPPAQDQPR.[S]	1xOxidation [M1]	3.93044e-06	9.84928e-05	1	1	2	Q9UQ35	Q9UQ35 [2431-2448]		0	1936.95								5117	No Quan Values	Light	High	Not Found	High	-1.63	0.0001206	2.812e-06	2.93
	TRUE	High	[R].MGQAPSQSLLPPAQDQPR.[S]	1xOxidation [M1]; 1xLabel:13C(6)15N(4) [R18]	0.000733804	0.00021741	1	1	1	Q9UQ35	Q9UQ35 [2431-2448]		0	1946.96								5117	Redundant	Heavy	Not Found	High	High	1.28	0.0002	0.000587	3.33
	TRUE	High	[R].NSGPLGTEMNTGFSSEVK.[E]	1xLabel:13C(6)15N(2) [K18]	4.23676e-05	9.84928e-05	1	1	1	Q9UQ35	Q9UQ35 [1335-1352]		0	1862.87	1.003	0.904756	0	99.8	100.2	2287928	1.76276e+06	5726		Heavy	Peak Found	High	High	-0.34	0.0001206	3.153e-05	3.4	42.92
	TRUE	High	[R].NSGPLGTEMNTGFSSEVK.[E]	1xOxidation [M9]	1.58673e-06	9.84928e-05	1	1	1	Q9UQ35	Q9UQ35 [1335-1352]		0	1870.85	0.772	0.351517	0	112.9	87.1	2457610	1.45652e+06	5724		Light	High	Peak Found	High	-0.2	0.0001206	1.113e-06	4.17	32.88
	TRUE	High	[R].NSGPLGTEMNTGFSSEVK.[E]	1xOxidation [M9]; 1xLabel:13C(6)15N(2) [K18]	2.78966e-05	9.84928e-05	1	1	1	Q9UQ35	Q9UQ35 [1335-1352]		0	1878.86								5724	Redundant	Heavy	Peak Found	High	High	-2.3	0.0001206	2.065e-05	3.51	32.88
	TRUE	High	[R].SSTGPEPPAPTPLLAER.[H]		5.01757e-06	9.84928e-05	1	1	2	Q9UQ35	Q9UQ35 [357-373]		0	1719.89	0.569	0.00438508	0	127.5	72.5	17209294	7516549	6791		Light	High	Peak Found	High	-0.04	0.0001206	3.593e-06	3.61	40.48
	TRUE	High	[R].SSTGPEPPAPTPLLAER.[H]	1xLabel:13C(6)15N(4) [R17]	0.00013502	9.84928e-05	1	1	2	Q9UQ35	Q9UQ35 [357-373]		0	1729.9								6791	Redundant	Heavy	Peak Found	High	High	0.33	0.0001206	0.0001023	3.93	40.48
	TRUE	High	[K].SSTPPGESYFGVSSLQLK.[G]	1xLabel:13C(6)15N(2) [K18]	4.45639e-06	9.84928e-05	1	1	1	Q9UQ35	Q9UQ35 [1041-1058]		0	1891.95								6793	No Quan Values	Heavy	Not Found	High	High	-1.07	0.0001206	3.181e-06	3
	TRUE	High	[R].TAAALAPASLTSAR.[M]		2.31118e-05	9.84928e-05	1	1	1	Q9UQ35	Q9UQ35 [2357-2370]		0	1300.72	1.095	0.801137	0	95.5	104.5	14076047	11839674	6912		Light	High	Peak Found	High	0.25	0.0001206	1.702e-05	3.02	30.54
	TRUE	High	[R].TAAALAPASLTSAR.[M]	1xLabel:13C(6)15N(4) [R14]	0.0188104	0.0016188	1	1	1	Q9UQ35	Q9UQ35 [2357-2370]		0	1310.73								6912	Redundant	Heavy	Peak Found	High	High	0.37	0.001475	0.0145	2.91	30.54
	TRUE	High	[R].TAVAPSAVNLADPR.[T]	1xLabel:13C(6)15N(4) [R14]	0.00438348	0.00081157	1	1	2	Q9UQ35	Q9UQ35 [2275-2288]		0	1391.75	0.977	0.754684	0	101.2	98.8	12609080	9459048	6973		Heavy	Peak Found	High	High	0.78	0.0007817	0.003657	2.85	32.44
	TRUE	High	[R].TPAAAAAMNLASPR.[T]		1.30478e-05	9.84928e-05	1	1	1	Q9UQ35	Q9UQ35 [2261-2274]		0	1341.69	0.722	0.145716	0	116.2	83.8	5.78966e+06	3.20871e+06	7262		Light	High	Peak Found	High	1.94	0.0001206	9.5e-06	3.3	32.95
	TRUE	High	[R].TPAAAAAMNLASPR.[T]	1xLabel:13C(6)15N(4) [R14]	2.90875e-05	9.84928e-05	1	1	1	Q9UQ35	Q9UQ35 [2261-2274]		0	1351.7								7262	Redundant	Heavy	Peak Found	High	High	-0.67	0.0001206	2.153e-05	3.04	32.91
	TRUE	High	[R].TPAAAAAMNLASPR.[T]	1xOxidation [M8]	9.42091e-05	9.84928e-05	1	1	1	Q9UQ35	Q9UQ35 [2261-2274]		0	1357.69	1.233	0.538138	0	89.6	110.4	2.26885e+06	2.14787e+06	7261		Light	High	Peak Found	High	0.19	0.0001206	7.121e-05	3.5	22.6
	TRUE	High	[R].TPAALAALSLTGSGTPPTAANYPSSSR.[T]		2.87132e-06	9.84928e-05	1	1	1	Q9UQ35	Q9UQ35 [2302-2328]		0	2559.3	0.212	4.43969e-10	0	165	35	7.54384e+06	1.22918e+06	7263		Light	High	Peak Found	High	2.06	0.0001206	2.04e-06	4.81	58.07
	TRUE	High	[R].TPAALAALSLTGSGTPPTAANYPSSSR.[T]	1xLabel:13C(6)15N(4) [R27]	1.21716e-06	9.84928e-05	1	1	2	Q9UQ35	Q9UQ35 [2302-2328]		0	2569.31								7263	Redundant	Heavy	Peak Found	High	High	-0.21	0.0001206	8.523e-07	4.75	57.98
	TRUE	High	[R].TPAIPTAVNLADSR.[T]		0.0199413	0.0017975	1	1	1	Q9UQ35	Q9UQ35 [2247-2260]		0	1425.77	0.949	0.65902	0	102.6	97.4	11273024	8215679	7266		Light	High	Peak Found	High	-0.17	0.001605	0.01532	2.5	42.06
	TRUE	High	[R].TPAIPTAVNLADSR.[T]	1xLabel:13C(6)15N(4) [R14]	0.000283446	9.84928e-05	1	1	1	Q9UQ35	Q9UQ35 [2247-2260]		0	1435.78								7266	Redundant	Heavy	Peak Found	High	High	-0.91	0.0001206	0.0002189	3.23	42.06
	TRUE	High	[R].TPQAPASANLVGPR.[S]		8.08756e-05	9.84928e-05	1	1	1	Q9UQ35	Q9UQ35 [2329-2342]		0	1378.74								7301	Redundant	Light	High	Peak Found	High	0.02	0.0001206	6.089e-05	2.47	25.33
	TRUE	High	[R].TPQAPASANLVGPR.[S]	1xLabel:13C(6)15N(4) [R14]	0.000171885	9.84928e-05	1	1	1	Q9UQ35	Q9UQ35 [2329-2342]		0	1388.75	0.87	0.423651	0	107	93	19046620	12725659	7301		Heavy	Peak Found	High	High	0.4	0.0001206	0.0001311	2.65	25.33
	TRUE	High	[R].TPTAPAVNLAGAR.[T]		0.00982925	0.00112166	1	1	1	Q9UQ35	Q9UQ35 [2289-2301]		0	1238.69	0.915	0.530642	0	104.4	95.6	14932709	10497573	7304		Light	High	Peak Found	High	-0.15	0.00106	0.007914	2.07	27.88
TRUE	High	Master Protein	P68371	Tubulin beta-4B chain OS=Homo sapiens OX=9606 GN=TUBB4B PE=1 SV=1	0	293.55	55	18	130	4	445	49.8	4.89	448.93	18	Pf00091, Pf03953	10383	ENSG00000188229	TUBB4B	A2BFA2; hsa:10383; P05217; P68371	Alzheimer's disease and miRNA effects; Pathogenic Escherichia coli infection; Parkin-ubiquitin proteasomal system pathway; Alzheimer's disease	Neutrophil degranulation; Separation of Sister Chromatids; The role of GTSE1 in G2/M progression after G2 checkpoint; Resolution of Sister Chromatid Cohesion; RHO GTPases Activate Formins; EML4 and NUDC in mitotic spindle formation; COPI-mediated anterograde transport; Recruitment of NuMA to mitotic centrosomes; Regulation of PLK1 Activity at G2/M Transition; Loss of Nlp from mitotic centrosomes;…	Phagosome; Gap junction; Alzheimer disease; Parkinson disease; Amyotrophic lateral sclerosis; Huntington disease; Prion disease; Pathways of neurodegeneration; Pathogenic Escherichia coli infection; Salmonella infection	51	5	1.035	0.897288	4.2	93.8	106.2	9.56288e+07	8.31728e+07	High	High	1
	Checked	Confidence	Annotated Sequence	Modifications	Qvality PEP	Qvality q-value	# Protein Groups	# Proteins	# PSMs	Master Protein Accessions	Positions in Master Proteins	Modifications in Master Proteins	# Missed Cleavages	Theo. MH+ [Da]	Abundance Ratio: (Heavy) / (Light)	Abundance Ratio P-Value: (Heavy) / (Light)	Abundance Ratio Variability [%]: (Heavy) / (Light)	Abundances (Grouped): Light	Abundances (Grouped): Heavy	Abundance: F1: Light, Sample	Abundance: F1: Heavy, Sample	Precursor Quan Result ID	Quan Info	Quan Channel	Found in Sample: [S1] F1: Light, Sample	Found in Sample: [S3] F1: Heavy, Sample	Confidence (by Search Engine): Sequest HT	DeltaM [ppm] (by Search Engine): Sequest HT	Percolator q-Value (by Search Engine): Sequest HT	Percolator PEP (by Search Engine): Sequest HT	XCorr (by Search Engine): Sequest HT	Top Apex RT [min]
	TRUE	High	[R].ALTVPELTQQMFDAK.[N]		4.71198e-07	9.84928e-05	2	3	4	Q13509; P68371	Q13509 [283-297]; P68371 [283-297]		0	1691.87	1.006	0.876275	0	99.7	100.3	1.43444e+07	1.10837e+07	451	Shared	Light	High	Peak Found	High	-0.45	0.0001206	3.245e-07	3.19	65.54
	TRUE	High	[R].ALTVPELTQQMFDAK.[N]	1xLabel:13C(6)15N(2) [K15]	6.58658e-06	9.84928e-05	2	3	3	Q13509; P68371	Q13509 [283-297]; P68371 [283-297]		0	1699.88								451	Redundant	Heavy	Peak Found	High	High	-0.28	0.0001206	4.729e-06	4	65.54
	TRUE	High	[R].ALTVPELTQQMFDAK.[N]	1xOxidation [M11]; 1xLabel:13C(6)15N(2) [K15]	7.86611e-05	9.84928e-05	2	3	1	Q13509; P68371	Q13509 [283-297]; P68371 [283-297]		0	1715.88	100	1e-17			200		6.19004e+06	452	Shared	Heavy	Not Found	High	High	-1.49	0.0001206	5.9e-05	3.27	50.77
	TRUE	High	[R].AVLVDLEPGTMDSVR.[S]		2.75359e-06	9.84928e-05	1	3	1	P68371	P68371 [63-77]		0	1601.82	1.033	0.9982	0	98.4	101.6	23069848	18294428	799		Light	High	Peak Found	High	-0.34	0.0001206	1.957e-06	3.36	53.06
	TRUE	High	[R].AVLVDLEPGTMDSVR.[S]	1xLabel:13C(6)15N(4) [R15]	2.65685e-05	9.84928e-05	1	3	2	P68371	P68371 [63-77]		0	1611.83								799	Redundant	Heavy	Peak Found	High	High	0.07	0.0001206	1.962e-05	3.39	53.06
	TRUE	High	[R].AVLVDLEPGTMDSVR.[S]	1xOxidation [M11]	7.44112e-05	9.84928e-05	1	3	2	P68371	P68371 [63-77]		0	1617.82	1.009	0.91676	0	99.5	100.5	20433304	15838373	800		Light	High	Peak Found	High	-0.06	0.0001206	5.569e-05	2.55	44.34
	TRUE	High	[R].AVLVDLEPGTMDSVR.[S]	1xOxidation [M11]; 1xLabel:13C(6)15N(4) [R15]	1.72531e-06	9.84928e-05	1	3	1	P68371	P68371 [63-77]		0	1627.82								800	Redundant	Heavy	Peak Found	High	High	0.71	0.0001206	1.211e-06	2.78	44.34
	TRUE	High	[R].EIVHIQAGQCGNQIGAK.[F]	1xCarbamidomethyl [C10]	1.77414e-06	9.84928e-05	4	6	2	Q13509; P07437; P68371; Q9BVA1	Q13509 [3-19]; P07437 [3-19]; P68371 [3-19]; Q9BVA1 [3-19]		0	1822.92	1.684	0.0398853	0	74.5	125.5	3.23641e+06	4.18464e+06	1875	Shared	Light	High	Peak Found	High	-0.43	0.0001206	1.246e-06	3.7	24.2
	TRUE	High	[R].EIVHLQAGQCGNQIGAK.[F]	1xCarbamidomethyl [C10]; 1xLabel:13C(6)15N(2) [K17]	0.000285384	9.84928e-05	4	6	2	Q13509; P07437; P68371; Q9BVA1	Q13509 [3-19]; P07437 [3-19]; P68371 [3-19]; Q9BVA1 [3-19]		0	1830.94								1875	Redundant	Heavy	Peak Found	High	High	-1.35	0.0001206	0.0002203	3.76
	TRUE	High	[K].EVDEQMLNVQNK.[N]		2.65919e-06	9.84928e-05	3	4	3	P07437; P68371; Q9BVA1	P07437 [325-336]; P68371 [325-336]; Q9BVA1 [325-336]		0	1446.69	1.347	0.212733	0	85.2	114.8	50393496	52119832	2088	Shared	Light	High	Peak Found	High	-0.15	0.0001206	1.885e-06	4.65	28.23
	TRUE	High	[K].EVDEQMLNVQNK.[N]	1xLabel:13C(6)15N(2) [K12]	1.6424e-05	9.84928e-05	3	4	3	P07437; P68371; Q9BVA1	P07437 [325-336]; P68371 [325-336]; Q9BVA1 [325-336]		0	1454.7								2088	Redundant	Heavy	Peak Found	High	High	0.16	0.0001206	1.204e-05	4.31	28.23
	TRUE	High	[K].EVDEQMLNVQNK.[N]	1xOxidation [M6]	0.000176684	9.84928e-05	3	4	9	P07437; P68371; Q9BVA1	P07437 [325-336]; P68371 [325-336]; Q9BVA1 [325-336]		0	1462.68	1.629	0.125727	0	76.1	123.9	773307	967422	2089	Shared	Light	High	Peak Found	High	-0.19	0.0001206	0.000135	3.25	21.55
	TRUE	High	[K].EVDEQMLNVQNK.[N]	1xOxidation [M6]; 1xLabel:13C(6)15N(2) [K12]	0.000252406	9.84928e-05	3	4	4	P07437; P68371; Q9BVA1	P07437 [325-336]; P68371 [325-336]; Q9BVA1 [325-336]		0	1470.7								2089	Redundant	Heavy	Peak Found	High	High	0.96	0.0001206	0.0001944	3.51	21.55
	TRUE	High	[R].FPGQLNADLRK.[L]		0.0154181	0.00146171	4	10	2	Q13509; P07437; P68371; Q9BVA1	Q13509 [242-252]; P07437 [242-252]; P68371 [242-252]; Q9BVA1 [242-252]		1	1258.69								2296	Redundant	Light	High	Peak Found	High	-0.62	0.001368	0.01206	2.71	26.14
	TRUE	High	[R].FPGQLNADLRK.[L]	1xLabel:13C(6)15N(2) [K11]; 1xLabel:13C(6)15N(4) [R10]	0.00276625	0.000632611	4	10	2	Q13509; P07437; P68371; Q9BVA1	Q13509 [242-252]; P07437 [242-252]; P68371 [242-252]; Q9BVA1 [242-252]		1	1276.71	1.222	0.446221	0	90	110	9515868	8932223	2296	Shared	Heavy	Peak Found	High	High	0.36	0.0004992	0.002315	1.85	26.14
	TRUE	High	[K].FWEVISDEHGIDPTGTYHGDSDLQLER.[I]		0.00768853	0.000965695	1	2	1	P68371	P68371 [20-46]		0	3116.42								2378	No Quan Values	Light	High	Not Found	High	0.65	0.0008827	0.006321	4.29
	TRUE	High	[K].GHYTEGAELVDSVLDVVR.[K]		1.63117e-08	9.84928e-05	4	5	4	Q13509; P07437; P68371; Q9BVA1	Q13509 [104-121]; P07437 [104-121]; P68371 [104-121]; Q9BVA1 [104-121]		0	1958.98	1.369	0.188706	0	84.4	115.6	9.21156e+06	9.68214e+06	2600	Shared	Light	High	Peak Found	High	-0.12	0.0001206	1.065e-08	4.68	71.8
	TRUE	High	[K].GHYTEGAELVDSVLDVVR.[K]	1xLabel:13C(6)15N(4) [R18]	9.39767e-10	9.84928e-05	4	5	3	Q13509; P07437; P68371; Q9BVA1	Q13509 [104-121]; P07437 [104-121]; P68371 [104-121]; Q9BVA1 [104-121]		0	1968.99								2600	Redundant	Heavy	Peak Found	High	High	0.45	0.0001206	5.86e-10	5.51	71.8
	TRUE	High	[K].GHYTEGAELVDSVLDVVRK.[E]		3.48944e-09	9.84928e-05	4	5	4	Q13509; P07437; P68371; Q9BVA1	Q13509 [104-122]; P07437 [104-122]; P68371 [104-122]; Q9BVA1 [104-122]		1	2087.08	1.37	0.184524	0	84.4	115.6	1.74903e+07	1.84046e+07	2601	Shared	Light	High	Peak Found	High	-0.04	0.0001206	2.215e-09	5.74	67.09
	TRUE	High	[K].GHYTEGAELVDSVLDVVRK.[E]	1xLabel:13C(6)15N(2) [K19]; 1xLabel:13C(6)15N(4) [R18]	7.26153e-08	9.84928e-05	4	5	5	Q13509; P07437; P68371; Q9BVA1	Q13509 [104-122]; P07437 [104-122]; P68371 [104-122]; Q9BVA1 [104-122]		1	2105.1								2601	Redundant	Heavy	Peak Found	High	High	-0.01	0.0001206	4.855e-08	4.3	67.09
	TRUE	High	[K].LAVNMVPFPR.[L]		3.25173e-05	9.84928e-05	4	10	2	Q13509; P07437; P68371; Q9BVA1	Q13509 [253-262]; P07437 [253-262]; P68371 [253-262]; Q9BVA1 [253-262]		0	1143.63								3399	Redundant	Light	High	Peak Found	High	0.04	0.0001206	2.404e-05	3.25	52.79
	TRUE	High	[K].LAVNMVPFPR.[L]	1xLabel:13C(6)15N(4) [R10]	1.4588e-05	9.84928e-05	4	10	2	Q13509; P07437; P68371; Q9BVA1	Q13509 [253-262]; P07437 [253-262]; P68371 [253-262]; Q9BVA1 [253-262]		0	1153.64	1.086	0.810047	0	95.9	104.1	56063932	46777856	3399	Shared	Heavy	Peak Found	High	High	0.18	0.0001206	1.065e-05	3.99	52.79
	TRUE	High	[K].LAVNMVPFPR.[L]	1xOxidation [M5]	5.04185e-05	9.84928e-05	4	10	2	Q13509; P07437; P68371; Q9BVA1	Q13509 [253-262]; P07437 [253-262]; P68371 [253-262]; Q9BVA1 [253-262]		0	1159.63	1.084	0.817592	0	96	104	49877290	41529618	3400	Shared	Light	High	Peak Found	High	0.2	0.0001206	3.755e-05	3.49	42.5
	TRUE	High	[K].LAVNMVPFPR.[L]	1xOxidation [M5]; 1xLabel:13C(6)15N(4) [R10]	1.90137e-05	9.84928e-05	4	10	2	Q13509; P07437; P68371; Q9BVA1	Q13509 [253-262]; P07437 [253-262]; P68371 [253-262]; Q9BVA1 [253-262]		0	1169.64								3400	Redundant	Heavy	Peak Found	High	High	-0.08	0.0001206	1.393e-05	3.34	42.5
	TRUE	High	[R].LHFFMPGFAPLTSR.[G]		8.06399e-07	9.84928e-05	3	8	3	P07437; P68371; Q9BVA1	P07437 [263-276]; P68371 [263-276]; Q9BVA1 [263-276]		0	1620.84	1.066	0.878654	0	96.8	103.2	1.7264e+07	1.41373e+07	3808	Shared	Light	High	Peak Found	High	-0.02	0.0001206	5.624e-07	3.72	69.54
	TRUE	High	[R].LHFFMPGFAPLTSR.[G]	1xLabel:13C(6)15N(4) [R14]	1.66615e-06	9.84928e-05	3	8	5	P07437; P68371; Q9BVA1	P07437 [263-276]; P68371 [263-276]; Q9BVA1 [263-276]		0	1630.84								3808	Redundant	Heavy	Peak Found	High	High	-0.28	0.0001206	1.173e-06	3.47	69.54
	TRUE	High	[R].LHFFMPGFAPLTSR.[G]	1xOxidation [M5]	9.27066e-06	9.84928e-05	3	8	6	P07437; P68371; Q9BVA1	P07437 [263-276]; P68371 [263-276]; Q9BVA1 [263-276]		0	1636.83	1.13	0.67175	0	93.9	106.1	2.20853e+07	1.91632e+07	3807	Shared	Light	High	Peak Found	High	0.03	0.0001206	6.691e-06	3.77	60.27
	TRUE	High	[R].LHFFMPGFAPLTSR.[G]	1xOxidation [M5]; 1xLabel:13C(6)15N(4) [R14]	3.74309e-06	9.84928e-05	3	8	3	P07437; P68371; Q9BVA1	P07437 [263-276]; P68371 [263-276]; Q9BVA1 [263-276]		0	1646.84								3807	Redundant	Heavy	Peak Found	High	High	-0.13	0.0001206	2.678e-06	4.14	60.27
	TRUE	High	[R].IMNTFSVVPSPK.[V]		2.0963e-05	9.84928e-05	3	4	3	Q13509; P07437; P68371	Q13509 [163-174]; P07437 [163-174]; P68371 [163-174]		0	1319.7	1.094	0.785925	0	95.5	104.5	73077896	61381864	4170	Shared	Light	High	Peak Found	High	0.1	0.0001206	1.543e-05	3.68	43.82
	TRUE	High	[R].IMNTFSVVPSPK.[V]	1xLabel:13C(6)15N(2) [K12]	8.70654e-06	9.84928e-05	3	4	1	Q13509; P07437; P68371	Q13509 [163-174]; P07437 [163-174]; P68371 [163-174]		0	1327.72								4170	Redundant	Heavy	Peak Found	High	High	0.07	0.0001206	6.284e-06	4.39	43.82
	TRUE	High	[R].IMNTFSVVPSPK.[V]	1xOxidation [M2]	2.31282e-06	9.84928e-05	3	4	4	Q13509; P07437; P68371	Q13509 [163-174]; P07437 [163-174]; P68371 [163-174]		0	1335.7	1.084	0.817907	0	96	104	4.40074e+07	3.6639e+07	4171	Shared	Light	High	Peak Found	High	-0.18	0.0001206	1.632e-06	3.35	36.33
	TRUE	High	[R].IMNTFSVVPSPK.[V]	1xOxidation [M2]; 1xLabel:13C(6)15N(2) [K12]	1.28671e-05	9.84928e-05	3	4	3	Q13509; P07437; P68371	Q13509 [163-174]; P07437 [163-174]; P68371 [163-174]		0	1343.71								4171	Redundant	Heavy	Peak Found	High	High	0.06	0.0001206	9.369e-06	4.12	36.33
	TRUE	High	[R].INVYYNEATGGK.[Y]		4.06998e-06	9.84928e-05	1	1	2	P68371	P68371 [47-58]		0	1328.65	1.181	0.528436	0	91.7	108.3	21959804	19913934	4249		Light	High	Peak Found	High	0.31	0.0001206	2.904e-06	3.25	25.82
	TRUE	High	[R].INVYYNEATGGK.[Y]	1xLabel:13C(6)15N(2) [K12]	9.75315e-05	9.84928e-05	1	1	2	P68371	P68371 [47-58]		0	1336.66								4249	Redundant	Heavy	Peak Found	High	High	-0.27	0.0001206	7.377e-05	3.19	25.82
	TRUE	High	[R].INVYYNEATGGKYVPR.[A]		3.4621e-05	9.84928e-05	1	1	1	P68371	P68371 [47-62]		1	1843.93	1.066	0.910093	0	96.8	103.2	10620616	8693908	4250		Light	High	Peak Found	High	2.3	0.0001206	2.562e-05	4.57
	TRUE	High	[R].INVYYNEATGGKYVPR.[A]	1xLabel:13C(6)15N(2) [K12]; 1xLabel:13C(6)15N(4) [R16]	6.08323e-05	9.84928e-05	1	1	2	P68371	P68371 [47-62]		1	1861.96								4250	Redundant	Heavy	Peak Found	High	High	-2.31	0.0001206	4.562e-05	3.88	34.78
	TRUE	High	[R].ISEQFTAMFR.[R]		0.000696024	0.00021741	4	6	1	Q13509; P07437; P68371; Q9BVA1	Q13509 [381-390]; P07437 [381-390]; P68371 [381-390]; Q9BVA1 [381-390]		0	1229.6	0.01	1e-17		200		4.04752e+06		4448	Shared	Light	High	Not Found	High	-0.33	0.0002	0.0005556	3.24	51.86
	TRUE	High	[R].ISEQFTAMFR.[R]	1xOxidation [M8]	0.000400399	9.84928e-05	4	6	1	Q13509; P07437; P68371; Q9BVA1	Q13509 [381-390]; P07437 [381-390]; P68371 [381-390]; Q9BVA1 [381-390]		0	1245.59	1.547	0.088717	0	78.5	121.5	5.12159e+06	6083780	4449	Shared	Light	High	Peak Found	High	-0.17	0.0001206	0.0003124	2.53	38.3
	TRUE	High	[R].ISEQFTAMFR.[R]	1xOxidation [M8]; 1xLabel:13C(6)15N(4) [R10]	0.000293262	9.84928e-05	4	6	1	Q13509; P07437; P68371; Q9BVA1	Q13509 [381-390]; P07437 [381-390]; P68371 [381-390]; Q9BVA1 [381-390]		0	1255.6								4449	Redundant	Heavy	Peak Found	High	High	1.61	0.0001206	0.0002277	2.73	38.3
	TRUE	High	[K].MSATFIGNSTAIQELFKR.[I]	1xLabel:13C(6)15N(2) [K17]; 1xLabel:13C(6)15N(4) [R18]	0.0158039	0.00146171	2	3	1	P68371; Q9BVA1	P68371 [363-380]; Q9BVA1 [363-380]		1	2032.07	1.591	0.148364	0	77.2	122.8	1.33269e+06	1.62825e+06	5284	Shared	Heavy	Peak Found	High	High	0.13	0.001368	0.0123	2.64	66.73
	TRUE	High	[K].MSATFIGNSTAIQELFKR.[I]	1xOxidation [M1]; 1xLabel:13C(6)15N(2) [K17]; 1xLabel:13C(6)15N(4) [R18]	0.0136369	0.00137984	2	3	1	P68371; Q9BVA1	P68371 [363-380]; Q9BVA1 [363-380]		1	2048.06	1.035	0.96436	0	98.3	101.7	1.92419e+06	1.53014e+06	5283	Shared	Heavy	Peak Found	High	High	-0.55	0.001311	0.01077	2.35	62.83
	TRUE	High	[K].NSSYFVEWIPNNVK.[TV]		2.34532e-06	9.84928e-05	4	7	3	Q13509; P07437; P68371; Q9BVA1	Q13509 [337-350]; P07437 [337-350]; P68371 [337-350]; Q9BVA1 [337-350]		0	1696.83								5746	Redundant	Light	High	Peak Found	High	0.17	0.0001206	1.66e-06	4.07	62.76
	TRUE	High	[K].NSSYFVEWIPNNVK.[TV]	1xLabel:13C(6)15N(2) [K14]	1.56474e-06	9.84928e-05	4	7	2	Q13509; P07437; P68371; Q9BVA1	Q13509 [337-350]; P07437 [337-350]; P68371 [337-350]; Q9BVA1 [337-350]		0	1704.85	1.158	0.590034	0	92.7	107.3	47788028	42496376	5746	Shared	Heavy	Peak Found	High	High	-0.35	0.0001206	1.097e-06	3.99	62.76
	TRUE	High	[R].SGPFGQIFRPDNFVFGQSGAGNNWAK.[G]		1.16653e-10	9.84928e-05	3	5	5	P07437; P68371; Q9BVA1	P07437 [78-103]; P68371 [78-103]; Q9BVA1 [78-103]		0	2798.34								6444	Redundant	Light	High	Peak Found	High	0.58	0.0001206	6.991e-11	8.13	71.7
	TRUE	High	[R].SGPFGQIFRPDNFVFGQSGAGNNWAK.[G]	1xLabel:13C(6)15N(2) [K26]; 1xLabel:13C(6)15N(4) [R9]	3.55367e-13	9.84928e-05	3	5	4	P07437; P68371; Q9BVA1	P07437 [78-103]; P68371 [78-103]; Q9BVA1 [78-103]		0	2816.37	1.06	0.899145	0	97.1	102.9	4.42648e+07	3.60477e+07	6444	Shared	Heavy	Peak Found	High	High	0.67	0.000120642	1.94091e-13	8.9	71.7
	TRUE	High	[R].YLTVAAVFR.[G]		0.000205526	9.84928e-05	2	3	3	P07437; P68371	P07437 [310-318]; P68371 [310-318]		0	1039.59	1.501	0.0799355	0	80	120	9026074	10403497	8476	Shared	Light	High	Peak Found	High	0.04	0.0001206	0.0001572	2.25	52.77
	TRUE	High	[R].YLTVAAVFR.[G]	1xLabel:13C(6)15N(4) [R9]	0.000142689	9.84928e-05	2	3	3	P07437; P68371	P07437 [310-318]; P68371 [310-318]		0	1049.6								8476	Redundant	Heavy	Peak Found	High	High	-0.16	0.0001206	0.0001085	3.13	52.77
TRUE	High	Master Protein	P10809	60 kDa heat shock protein, mitochondrial OS=Homo sapiens OX=9606 GN=HSPD1 PE=1 SV=2	0	292.346	38	15	87	15	573	61	5.87	347.03	15	Pf00118	3329	ENSG00000144381	HSPD1	B2R5M6; B7Z712; hsa:3329; P10809; Q38L19; Q9UCR6	Apoptosis-related network due to altered Notch3 in ovarian cancer; Sudden infant death syndrome (SIDS) susceptibility pathways	Mitochondrial protein import; TFAP2A acts as a transcriptional repressor during retinoic acid induced cell differentiation	RNA degradation; Type I diabetes mellitus; Legionellosis; Tuberculosis; Lipid and atherosclerosis	9	0	1.123	0.653862	11.24	90.3	109.7	1.80952e+08	1.68712e+08	High	High	1
	Checked	Confidence	Annotated Sequence	Modifications	Qvality PEP	Qvality q-value	# Protein Groups	# Proteins	# PSMs	Master Protein Accessions	Positions in Master Proteins	Modifications in Master Proteins	# Missed Cleavages	Theo. MH+ [Da]	Abundance Ratio: (Heavy) / (Light)	Abundance Ratio P-Value: (Heavy) / (Light)	Abundance Ratio Variability [%]: (Heavy) / (Light)	Abundances (Grouped): Light	Abundances (Grouped): Heavy	Abundance: F1: Light, Sample	Abundance: F1: Heavy, Sample	Precursor Quan Result ID	Quan Info	Quan Channel	Found in Sample: [S1] F1: Light, Sample	Found in Sample: [S3] F1: Heavy, Sample	Confidence (by Search Engine): Sequest HT	DeltaM [ppm] (by Search Engine): Sequest HT	Percolator q-Value (by Search Engine): Sequest HT	Percolator PEP (by Search Engine): Sequest HT	XCorr (by Search Engine): Sequest HT	Top Apex RT [min]
	TRUE	High	[R].ALMLQGVDLLADAVAVTMGPK.[G]	1xOxidation [M]	2.31256e-07	9.84928e-05	1	1	5	P10809	P10809 [38-58]		0	2129.13								403	Redundant	Light	High	Peak Found	High	-0.1	0.0001206	1.58e-07	4.2	87.76
	TRUE	High	[R].ALMLQGVDLLADAVAVTMGPK.[G]	1xOxidation [M]; 1xLabel:13C(6)15N(2) [K21]	5.53228e-07	9.84928e-05	1	1	5	P10809	P10809 [38-58]		0	2137.15	1.02	0.928052	0	99	101	464629	363804	403		Heavy	Peak Found	High	High	-0.72	0.0001206	3.812e-07	5	87.76
	TRUE	High	[R].ALMLQGVDLLADAVAVTMGPK.[G]	2xOxidation [M3; M18]	7.31007e-10	9.84928e-05	1	1	3	P10809	P10809 [38-58]		0	2145.13								405	Redundant	Light	High	Peak Found	High	0.14	0.0001206	4.543e-10	6.68	81.41
	TRUE	High	[R].ALMLQGVDLLADAVAVTMGPK.[G]	2xOxidation [M3; M18]; 1xLabel:13C(6)15N(2) [K21]	4.94631e-09	9.84928e-05	1	1	4	P10809	P10809 [38-58]		0	2153.14	1.099	0.815405	0	95.3	104.7	3.48086e+06	2.93765e+06	405		Heavy	Peak Found	High	High	-0.13	0.0001206	3.167e-09	5.69	81.41
	TRUE	High	[K].DRVTDALNATR.[A]	2xLabel:13C(6)15N(4) [R2; R11]	0.0140887	0.00137984	1	1	2	P10809	P10809 [419-429]		1	1251.66	1.516	0.0613355	0	79.5	120.5	10041257	11692812	1289		Heavy	Peak Found	High	High	0.22	0.001311	0.01108	2.79	24.94
	TRUE	High	[K].FDRGYISPYFINTSK.[G]	1xLabel:13C(6)15N(2) [K15]; 1xLabel:13C(6)15N(4) [R3]	0.00634032	0.000965695	1	1	1	P10809	P10809 [219-233]		1	1825.92	1.051	0.979031	0	97.5	102.5	2.20597e+06	1.77979e+06	2183		Heavy	Peak Found	High	High	0.7	0.0008827	0.005241	2.76	49.57
	TRUE	High	[R].GYISPYFINTSK.[G]		0.0998375	0.0069094	1	1	1	P10809	P10809 [222-233]		0	1389.7								2969	Redundant	Light	High	Peak Found	High	1.27	0.005326	0.07315	1.99	47.74
	TRUE	High	[R].GYISPYFINTSK.[G]	1xLabel:13C(6)15N(2) [K12]	0.000448799	0.00021741	1	1	2	P10809	P10809 [222-233]		0	1397.72	1.193	0.496262	0	91.2	108.8	16779440	15379494	2969		Heavy	Peak Found	High	High	-0.59	0.0002	0.000351	3.06	47.74
	TRUE	High	[K].IMQSSSEVGYDAMAGDFVNMVEK.[G]		5.64931e-07	9.84928e-05	1	1	1	P10809	P10809 [494-516]		0	2508.11								4177	No Quan Values	Light	High	Not Found	High	0.9	0.0001206	3.893e-07	3.94
	TRUE	High	[K].IMQSSSEVGYDAMAGDFVNMVEK.[G]	1xLabel:13C(6)15N(2) [K23]	4.45614e-07	9.84928e-05	1	1	1	P10809	P10809 [494-516]		0	2516.12								4177	Redundant	Heavy	Not Found	High	High	-2.13	0.0001206	3.071e-07	5.28
	TRUE	High	[K].IMQSSSEVGYDAMAGDFVNMVEK.[G]	1xOxidation [M2]	5.23191e-07	9.84928e-05	1	1	2	P10809	P10809 [494-516]		0	2524.1								4179	Redundant	Light	High	Peak Found	High	1.03	0.0001206	3.62e-07	5.03	68.4
	TRUE	High	[K].IMQSSSEVGYDAMAGDFVNMVEK.[G]	1xOxidation [M2]; 1xLabel:13C(6)15N(2) [K23]	1.44866e-05	9.84928e-05	1	1	2	P10809	P10809 [494-516]		0	2532.12	1.398	0.302965	0	83.4	116.6	682167	732348	4179		Heavy	Peak Found	High	High	0.72	0.0001206	1.055e-05	3.65	68.4
	TRUE	High	[K].ISSIQSIVPALEIANAHR.[K]	1xLabel:13C(6)15N(4) [R18]	0.00100656	0.00021741	1	1	1	P10809	P10809 [251-268]		0	1929.08	1.029	0.977788	0	98.6	101.4	1.94254e+06	1.53485e+06	4516		Heavy	Peak Found	High	High	-1.05	0.0002	0.0008111	2.54	61.03
	TRUE	High	[K].LVQDVANNTNEEAGDGTTTATVLAR.[S]		1.32286e-09	9.84928e-05	1	1	4	P10809	P10809 [97-121]		0	2560.25	1.083	0.823113	0	96	104	66447046	55242370	4716		Light	High	Peak Found	High	0.38	0.0001206	8.302e-10	6.47	38.09
	TRUE	High	[K].LVQDVANNTNEEAGDGTTTATVLAR.[S]	1xLabel:13C(6)15N(4) [R25]	8.46374e-10	9.84928e-05	1	1	4	P10809	P10809 [97-121]		0	2570.26								4716	Redundant	Heavy	Peak Found	High	High	1.82	0.0001206	5.244e-10	6.57	38.09
	TRUE	High	[K].NAGVEGSLIVEK.[I]		1.56416e-05	9.84928e-05	1	1	3	P10809	P10809 [482-493]		0	1215.66								5441	Redundant	Light	High	Peak Found	High	0.33	0.0001206	1.143e-05	2.97	27.88
	TRUE	High	[K].NAGVEGSLIVEK.[I]	1xLabel:13C(6)15N(2) [K12]	0.0122753	0.00137984	1	1	2	P10809	P10809 [482-493]		0	1223.67	1.123	0.69152	0	94.2	105.8	16437812	14181039	5441		Heavy	Peak Found	High	High	-0.6	0.001254	0.009794	2.45	27.88
	TRUE	High	[K].QSKPVTTPEEIAQVATISANGDK.[E]		4.24397e-06	9.84928e-05	1	1	2	P10809	P10809 [158-180]		0	2384.23	0.737	0.171617	0	115.2	84.8	7531020	4260083	6073		Light	High	Peak Found	High	0.56	0.0001206	3.028e-06	4.54	45.18
	TRUE	High	[K].QSKPVTTPEEIAQVATISANGDK.[E]	2xLabel:13C(6)15N(2) [K3; K23]	7.23726e-05	9.84928e-05	1	1	2	P10809	P10809 [158-180]		0	2400.26								6073	Redundant	Heavy	Peak Found	High	High	-0.61	0.0001206	5.42e-05	3.42	45.18
	TRUE	High	[K].QSKPVTTPEEIAQVATISANGDKEIGNIISDAMKK.[V]	1xDeamidated [N27]; 2xLabel:13C(6)15N(2) [K34; K35]	0.00708101	0.000965695	1	1	1	P10809	P10809 [158-192]		2	3700.93									Inconsistently Labeled		Not Found	Not Found	High	-4.43	0.0008827	0.005835	3.41	66.69
	TRUE	High	[R].TLKIPAMTIAK.[N]		9.94041e-06	9.84928e-05	1	1	3	P10809	P10809 [471-481]		1	1186.72								7168	Redundant	Light	High	Peak Found	High	-0.05	0.0001206	7.216e-06	3.53	38.07
	TRUE	High	[R].TLKIPAMTIAK.[N]	1xOxidation [M7]	0.0337664	0.00276793	1	1	2	P10809	P10809 [471-481]		1	1202.72	1.153	0.685444	0	92.9	107.1	4793101	4243275	7169		Light	High	Peak Found	High	-0.29	0.002292	0.02523	2.2	22.75
	TRUE	High	[R].TLKIPAMTIAK.[N]	2xLabel:13C(6)15N(2) [K3; K11]	2.23202e-05	9.84928e-05	1	1	2	P10809	P10809 [471-481]		1	1202.75	2.215	0.000769775	0	62.2	137.8	5408030	9200231	7168		Heavy	Peak Found	High	High	-0.1	0.0001206	1.639e-05	3.07	38.07
	TRUE	High	[R].TLKIPAMTIAK.[N]	1xOxidation [M7]; 2xLabel:13C(6)15N(2) [K3; K11]	0.0941469	0.00660813	1	1	1	P10809	P10809 [471-481]		1	1218.75								7169	Redundant	Heavy	Peak Found	High	High	0.56	0.005107	0.06885	2.27	22.75
	TRUE	High	[K].TLNDELEIIEGMK.[F]		2.75359e-06	9.84928e-05	1	1	1	P10809	P10809 [206-218]		0	1504.76								7188	Redundant	Light	High	Peak Found	High	-0.32	0.0001206	1.956e-06	4.3	65.03
	TRUE	High	[K].TLNDELEIIEGMK.[F]	1xLabel:13C(6)15N(2) [K13]	2.91167e-06	9.84928e-05	1	1	1	P10809	P10809 [206-218]		0	1512.77	1.136	0.67054	0	93.6	106.4	6062605	5289214	7188		Heavy	Peak Found	High	High	0.3	0.0001206	2.073e-06	3.89	65.03
	TRUE	High	[K].TLNDELEIIEGMK.[F]	1xOxidation [M12]	1.26888e-05	9.84928e-05	1	1	1	P10809	P10809 [206-218]		0	1520.75	100	1e-17			200		2029492	7189		Light	High	Peak Found	High	-1.19	0.0001206	9.261e-06	3.85	55.2
	TRUE	High	[R].TVIIEQSWGSPK.[V]		4.12041e-05	9.84928e-05	1	1	1	P10809	P10809 [61-72]		0	1344.72	1.058	0.909047	0	97.2	102.8	18030808	14644513	7457		Light	High	Peak Found	High	-0.12	0.0001206	3.054e-05	3.67	38.46
	TRUE	High	[R].TVIIEQSWGSPK.[V]	1xLabel:13C(6)15N(2) [K12]	0.000318182	9.84928e-05	1	1	1	P10809	P10809 [61-72]		0	1352.73								7457	Redundant	Heavy	Peak Found	High	High	0.22	0.0001206	0.0002474	3.4	38.46
	TRUE	High	[K].VGEVIVTKDDAMLLK.[G]		0.00120137	0.000339819	1	1	2	P10809	P10809 [345-359]		1	1630.91	1.327	0.241565	0	85.9	114.1	13129971	1.33856e+07	7738		Light	High	Peak Found	High	-0.42	0.0002891	0.0009747	2.53	43.87
	TRUE	High	[K].VGEVIVTKDDAMLLK.[G]	2xLabel:13C(6)15N(2) [K8; K15]	4.93771e-05	9.84928e-05	1	1	1	P10809	P10809 [345-359]		1	1646.94								7738	Redundant	Heavy	Peak Found	High	High	0.03	0.0001206	3.684e-05	3.38	43.84
	TRUE	High	[K].VGEVIVTKDDAMLLK.[G]	1xOxidation [M12]; 2xLabel:13C(6)15N(2) [K8; K15]	0.0183463	0.0016188	1	1	1	P10809	P10809 [345-359]		1	1662.93								7739	No Quan Values	Heavy	Not Found	High	High	0.24	0.001416	0.01419	3.13
	TRUE	High	[K].VGLQVVAVK.[A]		0.00054825	0.00021741	1	1	1	P10809	P10809 [293-301]		0	912.588								7755	Redundant	Light	High	Peak Found	High	-0.29	0.0002	0.0004342	2.1	29.4
	TRUE	High	[K].VGLQVVAVK.[A]	1xLabel:13C(6)15N(2) [K9]	0.000416881	9.84928e-05	1	1	1	P10809	P10809 [293-301]		0	920.602	1.208	0.485465	0	90.6	109.4	6.77099e+06	6.28408e+06	7755		Heavy	Peak Found	High	High	-0.53	0.0001206	0.000327	2.77	29.4
TRUE	High	Master Protein	Q00610	Clathrin heavy chain 1 OS=Homo sapiens OX=9606 GN=CLTC PE=1 SV=5	0	292.102	23	29	87	29	1675	191.5	5.69	295.36	29	Pf00637, Pf01394, Pf09268, Pf13838	1213	ENSG00000141367	CLTC	D3DU00; hsa:1213; Q00610; Q6N0A0; Q86TF2	Synaptic vesicle pathway; VEGFA-VEGFR2 signaling pathway; Ebola virus pathway in host; Fragile X syndrome; 7q11.23 copy number variation syndrome; Complement and coagulation cascades	RHOV GTPase cycle; RHOU GTPase cycle; Cargo recognition for clathrin-mediated endocytosis; Recycling pathway of L1; MHC class II antigen presentation; WNT5A-dependent internalization of FZD4; EPH-ephrin mediated repulsion of cells; LDL clearance; Retrograde neurotrophin signalling; WNT5A-dependent internalization of FZD2, FZD5 and ROR2; VLDLR internalisation and degradation; ALK mutants bind TKIs…	Lysosome; Endocytosis; Synaptic vesicle cycle; Endocrine and other factor-regulated calcium reabsorption; Huntington disease; Bacterial invasion of epithelial cells	31	0	1.257	0.373562	13.8	86.2	113.8	1.69612e+08	1.7199e+08	High	High	1
	Checked	Confidence	Annotated Sequence	Modifications	Qvality PEP	Qvality q-value	# Protein Groups	# Proteins	# PSMs	Master Protein Accessions	Positions in Master Proteins	Modifications in Master Proteins	# Missed Cleavages	Theo. MH+ [Da]	Abundance Ratio: (Heavy) / (Light)	Abundance Ratio P-Value: (Heavy) / (Light)	Abundance Ratio Variability [%]: (Heavy) / (Light)	Abundances (Grouped): Light	Abundances (Grouped): Heavy	Abundance: F1: Light, Sample	Abundance: F1: Heavy, Sample	Precursor Quan Result ID	Quan Info	Quan Channel	Found in Sample: [S1] F1: Light, Sample	Found in Sample: [S3] F1: Heavy, Sample	Confidence (by Search Engine): Sequest HT	DeltaM [ppm] (by Search Engine): Sequest HT	Percolator q-Value (by Search Engine): Sequest HT	Percolator PEP (by Search Engine): Sequest HT	XCorr (by Search Engine): Sequest HT	Top Apex RT [min]
	TRUE	High	[K].ADDPSSYMEVVQAANTSGNWEELVK.[Y]		6.81952e-08	9.84928e-05	1	1	2	Q00610	Q00610 [1131-1155]		0	2740.24	1.087	0.852519	0	95.8	104.2	2.3867e+06	1.99267e+06	100		Light	High	Peak Found	High	0.04	0.0001206	4.537e-08	5.9	73.67
	TRUE	High	[K].ADDPSSYMEVVQAANTSGNWEELVK.[Y]	1xLabel:13C(6)15N(2) [K25]	3.76901e-07	9.84928e-05	1	1	2	Q00610	Q00610 [1131-1155]		0	2748.25								100	Redundant	Heavy	Peak Found	High	High	0.23	0.0001206	2.582e-07	5.01	73.67
	TRUE	High	[K].ADDPSSYMEVVQAANTSGNWEELVK.[Y]	1xOxidation [M8]	1.50006e-05	9.84928e-05	1	1	1	Q00610	Q00610 [1131-1155]		0	2756.24								101	No Quan Values	Light	High	Not Found	High	1.5	0.0001206	1.091e-05	3.95
	TRUE	High	[R].ALEHFTDLYDIKR.[A]		0.000837276	0.00021741	1	1	3	Q00610	Q00610 [626-638]		1	1620.84	1.528	0.063766	0	79.1	120.9	8986155	10542698	344		Light	High	Peak Found	High	0.24	0.0002	0.0006739	2.28	41.99
	TRUE	High	[R].ALEHFTDLYDIKR.[A]	1xLabel:13C(6)15N(2) [K12]; 1xLabel:13C(6)15N(4) [R13]	0.0071872	0.000965695	1	1	1	Q00610	Q00610 [626-638]		1	1638.86								344	Redundant	Heavy	Peak Found	High	High	-0.21	0.0008827	0.005927	2.74	41.99
	TRUE	High	[R].EHLELFWSR.[V]		0.00792429	0.00104825	1	1	1	Q00610	Q00610 [1334-1342]		0	1216.61								1728	No Quan Values	Light	High	Not Found	High	0.28	0.0009506	0.006485	2.08
	TRUE	High	[R].EHLELFWSR.[V]	1xLabel:13C(6)15N(4) [R9]	0.000955034	0.00021741	1	1	1	Q00610	Q00610 [1334-1342]		0	1226.62								1728	Redundant	Heavy	Not Found	High	High	0.21	0.0002	0.0007713	2.59
	TRUE	High	[R].ESYVETELIFALAK.[T]		0.00692514	0.000965695	1	1	1	Q00610	Q00610 [1166-1179]		0	1612.85								2047	No Quan Values	Light	High	Not Found	High	0.61	0.0008827	0.005695	2.96
	TRUE	High	[R].FLRENPYYDSR.[V]		0.000912078	0.00021741	1	1	1	Q00610	Q00610 [893-903]		1	1459.7	1.061	0.938573	0	97	103	10073780	8.20822e+06	2272		Light	High	Peak Found	High	-0.37	0.0002	0.000734	3.46	24.34
	TRUE	High	[R].FLRENPYYDSR.[V]	2xLabel:13C(6)15N(4) [R3; R11]	0.000930251	0.00021741	1	1	2	Q00610	Q00610 [893-903]		1	1479.71								2272	Redundant	Heavy	Peak Found	High	High	-0.79	0.0002	0.0007503	2.65	24.34
	TRUE	High	[K].FNALFAQGNYSEAAK.[V]	1xLabel:13C(6)15N(2) [K15]	1.32311e-05	9.84928e-05	1	1	1	Q00610	Q00610 [368-382]		0	1638.8								2285	No Quan Values	Heavy	Not Found	High	High	0.63	0.0001206	9.603e-06	4.06
	TRUE	High	[R].FQSVPAQPGQTSPLLQYFGILLDQGQLNK.[Y]	1xDeamidated [Q2]	0.0258476	0.00211525	1	1	1	Q00610	Q00610 [401-429]		0	3188.66	0.829	0.536067	0	109.4	90.6	23859.4	15189	2316		Light	High	Peak Found	High	2.77	0.001829	0.0195	3.74	94.51
	TRUE	High	[R].KFNALFAQGNYSEAAK.[V]		3.27836e-06	9.84928e-05	1	1	3	Q00610	Q00610 [367-382]		1	1758.88	1.367	0.184554	0	84.5	115.5	9961058	10461116	3118		Light	High	Peak Found	High	-0.52	0.0001206	2.338e-06	4.13	37.24
	TRUE	High	[R].KFNALFAQGNYSEAAK.[V]	2xLabel:13C(6)15N(2) [K1; K16]	1.52147e-07	9.84928e-05	1	1	2	Q00610	Q00610 [367-382]		1	1774.91								3118	Redundant	Heavy	Peak Found	High	High	-0.34	0.0001206	1.033e-07	4.53
	TRUE	High	[K].KVGYTPDWIFLLR.[NG]		0.00075843	0.00021741	1	2	1	Q00610	Q00610 [507-519]		1	1607.89	1.36	0.3562	0	84.7	115.3	724558	756946	3242		Light	High	Peak Found	High	-0.23	0.0002	0.0006051	2.46	73.53
	TRUE	High	[K].KVGYTPDWIFLLR.[NG]	1xLabel:13C(6)15N(2) [K1]; 1xLabel:13C(6)15N(4) [R13]	0.000299308	9.84928e-05	1	2	2	Q00610	Q00610 [507-519]		1	1625.92								3242	Redundant	Heavy	Peak Found	High	High	-0.19	0.0001206	0.0002315	3.62	73.53
	TRUE	High	[R].IAAYLFK.[G]		0.00215126	0.000424254	1	1	2	Q00610	Q00610 [1510-1516]		0	825.487	1.393	0.205225	0	83.6	116.4	6.0647e+06	6487102	3275		Light	High	Peak Found	High	0	0.0003475	0.001784	1.71	36
	TRUE	High	[R].LAELEEFINGPNNAHIQQVGDR.[C]		2.18583e-05	9.84928e-05	1	1	2	Q00610	Q00610 [1183-1204]		0	2464.22	1.077	0.871332	0	96.3	103.7	11262685	9316709	3287		Light	High	Peak Found	High	0.02	0.0001206	1.604e-05	3.86	54.54
	TRUE	High	[R].LAELEEFINGPNNAHIQQVGDR.[C]	1xLabel:13C(6)15N(4) [R22]	5.00689e-05	9.84928e-05	1	1	2	Q00610	Q00610 [1183-1204]		0	2474.23								3287	Redundant	Heavy	Peak Found	High	High	0.58	0.0001206	3.725e-05	3.57	54.54
	TRUE	High	[R].LASTLVHLGEYQAAVDGAR.[K]		8.76702e-08	9.84928e-05	1	1	2	Q00610	Q00610 [1227-1245]		0	1971.03	1.349	0.209952	0	85.1	114.9	1.87658e+07	1.94402e+07	3377		Light	High	Peak Found	High	0.67	0.0001206	5.868e-08	4.06	49.65
	TRUE	High	[R].LASTLVHLGEYQAAVDGAR.[K]	1xLabel:13C(6)15N(4) [R19]	1.2429e-06	9.84928e-05	1	1	3	Q00610	Q00610 [1227-1245]		0	1981.04								3377	Redundant	Heavy	Peak Found	High	High	0.5	0.0001206	8.725e-07	4.33	49.65
	TRUE	High	[K].LHIIEVGTPPTGNQPFPK.[K]		0.0405116	0.00334887	1	1	1	Q00610	Q00610 [228-245]		0	1945.05	1.057	0.897488	0	97.2	102.8	7.22999e+06	5867291	3813		Light	High	Peak Found	High	0.08	0.00265	0.02989	2.75	48.32
	TRUE	High	[K].LHIIEVGTPPTGNQPFPK.[K]	1xLabel:13C(6)15N(2) [K18]	0.0305532	0.00261618	1	1	1	Q00610	Q00610 [228-245]		0	1953.07								3813	Redundant	Heavy	Peak Found	High	High	0.44	0.002185	0.02281	2.33	48.32
	TRUE	High	[R].LKLLLPWLEAR.[I]		7.13743e-05	9.84928e-05	1	1	1	Q00610	Q00610 [855-865]		1	1351.85	1.215	0.544542	0	90.3	109.7	899372	839427	3854		Light	High	Peak Found	High	0.52	0.0001206	5.35e-05	3.55	72.47
	TRUE	High	[R].LKLLLPWLEAR.[I]	1xLabel:13C(6)15N(2) [K2]; 1xLabel:13C(6)15N(4) [R11]	0.00013225	9.84928e-05	1	1	2	Q00610	Q00610 [855-865]		1	1369.87								3854	Redundant	Heavy	Peak Found	High	High	-0.23	0.0001206	0.0001007	4.03	72.47
	TRUE	High	[K].LLLPWLEAR.[I]		0.0034507	0.00071665	1	1	1	Q00610	Q00610 [857-865]		0	1110.67	1.217	0.488607	0	90.2	109.8	5353554	5004042	4019		Light	High	Peak Found	High	0.15	0.0006511	0.002886	2.08	71.44
	TRUE	High	[K].LLLPWLEAR.[I]	1xLabel:13C(6)15N(4) [R9]	0.00133385	0.000339819	1	1	1	Q00610	Q00610 [857-865]		0	1120.68								4019	Redundant	Heavy	Peak Found	High	High	0.3	0.0002891	0.001088	1.92	71.44
	TRUE	High	[K].LLYNNVSNFGR.[L]		0.000232517	9.84928e-05	1	1	2	Q00610	Q00610 [1216-1226]		0	1296.67	1.301	0.278531	0	86.9	113.1	27218486	27191030	4146		Light	High	Peak Found	High	0.24	0.0001206	0.0001791	3.29	39.89
	TRUE	High	[K].LLYNNVSNFGR.[L]	1xLabel:13C(6)15N(4) [R11]	6.14274e-06	9.84928e-05	1	1	1	Q00610	Q00610 [1216-1226]		0	1306.68								4146	Redundant	Heavy	Peak Found	High	High	0.27	0.0001206	4.405e-06	3.38	39.89
	TRUE	High	[R].ISGETIFVTAPHEATAGIIGVNR.[K]	1xLabel:13C(6)15N(4) [R23]	3.29735e-05	9.84928e-05	1	1	1	Q00610	Q00610 [298-320]		0	2363.26	1.788	0.0730395	0	71.7	128.3	1.2374e+06	1.6992e+06	4463		Heavy	Peak Found	High	High	-0.1	0.0001206	2.441e-05	3.02	57.14
	TRUE	High	[R].NLQNLLILTAIK.[A]	1xLabel:13C(6)15N(2) [K12]	0.00013502	9.84928e-05	1	2	1	Q00610	Q00610 [1023-1034]		0	1361.86	1.305	0.4125	0	86.8	113.2	692575	694155	5634		Heavy	Peak Found	High	High	0.03	0.0001206	0.0001026	2.84	72.86
	TRUE	High	[R].NNLAGAEELFAR.[K]		0.000220118	9.84928e-05	1	1	2	Q00610	Q00610 [355-366]		0	1304.66	1.232	0.406486	0	89.6	110.4	17987184	17022056	5671		Light	High	Peak Found	High	-0.72	0.0001206	0.0001693	3.17	47.43
	TRUE	High	[R].NNLAGAEELFAR.[K]	1xLabel:13C(6)15N(4) [R12]	1.44866e-05	9.84928e-05	1	1	2	Q00610	Q00610 [355-366]		0	1314.67								5671	Redundant	Heavy	Peak Found	High	High	0.24	0.0001206	1.054e-05	3.85	47.43
	TRUE	High	[K].QLPLVKPYLR.[S]		0.00518511	0.000965695	1	1	1	Q00610	Q00610 [1444-1453]		0	1226.76	1.377	0.237154	0	84.2	115.8	4876874	5155717	5994		Light	High	Peak Found	High	0.31	0.0008827	0.004317	1.03	38.22
	TRUE	High	[R].QNLQICVQVASK.[Y]	1xCarbamidomethyl [C6]; 1xLabel:13C(6)15N(2) [K12]	0.10428	0.00696773	1	1	1	Q00610	Q00610 [677-688]		0	1395.75	100	1e-17			200		5910312	6033		Heavy	Not Found	High	High	0.12	0.005367	0.07647	2.25	22.21
	TRUE	High	[K].SVNESLNNLFITEEDYQALR.[T]		3.82139e-08	9.84928e-05	1	1	2	Q00610	Q00610 [1462-1481]		0	2355.15								6867	Redundant	Light	High	Peak Found	High	-0.71	0.0001206	2.522e-08	4.86	69.61
	TRUE	High	[K].SVNESLNNLFITEEDYQALR.[T]	1xLabel:13C(6)15N(4) [R20]	9.07868e-06	9.84928e-05	1	1	2	Q00610	Q00610 [1462-1481]		0	2365.15	1.511	0.124984	0	79.6	120.4	4.5358e+06	5265067	6867		Heavy	Peak Found	High	High	0.2	0.0001206	6.563e-06	4.81	69.61
	TRUE	High	[K].TLQIFNIEMK.[S]	1xLabel:13C(6)15N(2) [K10]	0.00326955	0.00071665	1	2	1	Q00610	Q00610 [87-96]		0	1244.68	1.185	0.555376	0	91.5	108.5	3542372	3224780	7199		Heavy	Peak Found	High	High	-0.01	0.0005779	0.002738	2.31	60.73
	TRUE	High	[K].TLQIFNIEMK.[S]	1xOxidation [M9]	0.0432649	0.00366907	1	2	1	Q00610	Q00610 [87-96]		0	1252.66	1.374	0.252377	0	84.2	115.8	4.13924e+06	4.3687e+06	7200		Light	High	Peak Found	High	-0.02	0.002942	0.032	2.29	50.2
	TRUE	High	[R].TSIDAYDNFDNISLAQR.[L]		1.36092e-06	9.84928e-05	1	1	1	Q00610	Q00610 [1482-1498]		0	1942.91								7362	Redundant	Light	High	Peak Found	High	0.32	0.0001206	9.521e-07	4.09	55.81
	TRUE	High	[R].TSIDAYDNFDNISLAQR.[L]	1xLabel:13C(6)15N(4) [R17]	1.43886e-07	9.84928e-05	1	1	2	Q00610	Q00610 [1482-1498]		0	1952.92	1.304	0.278661	0	86.8	113.2	10071091	10087249	7362		Heavy	Peak Found	High	High	-1.17	0.0001206	9.717e-08	4.51	55.81
	TRUE	High	[K].VGYTPDWIFLLR.[NG]		0.115218	0.00814083	1	2	1	Q00610	Q00610 [508-519]		0	1479.8	1.085	0.827669	0	95.9	104.1	342224	285092	7780		Light	High	Peak Found	High	-2.4	0.006158	0.08434	2.53	82.44
	TRUE	High	[K].VKQLPLVKPYLR.[S]	2xLabel:13C(6)15N(2) [K2; K8]; 1xLabel:13C(6)15N(4) [R12]	0.0739413	0.00555197	1	1	1	Q00610	Q00610 [1442-1453]		1	1479.96	1.076	0.84256	0	96.4	103.6	3696376	3.05311e+06	7810		Heavy	Peak Found	High	High	0.32	0.004291	0.05414	1.64	34.19
	TRUE	High	[K].VSQPIEGHAASFAQFK.[M]	1xLabel:13C(6)15N(2) [K16]	2.95259e-06	9.84928e-05	1	1	1	Q00610	Q00610 [190-205]		0	1724.88	1.011	0.984628	0	99.5	100.5	1.67553e+06	1.30037e+06	8122		Heavy	Peak Found	High	High	-0.17	0.0001206	2.092e-06	4.04	34.33
	TRUE	High	[R].VVGAMQLYSVDR.[K]		1.34169e-05	9.84928e-05	1	2	2	Q00610	Q00610 [177-188]		0	1337.69	1.37	0.245204	0	84.4	115.6	3.2418e+06	3.41168e+06	8184		Light	High	Peak Found	High	0.24	0.0001206	9.761e-06	2.71	41.37
	TRUE	High	[R].VVGAMQLYSVDR.[K]	1xOxidation [M5]	0.00115511	0.000339819	1	2	1	Q00610	Q00610 [177-188]		0	1353.68	1.257	0.498064	0	88.6	111.4	2.30459e+06	2.22521e+06	8185		Light	High	Peak Found	High	-0.07	0.0002891	0.0009361	2.58	31.61
	TRUE	High	[R].VVGAMQLYSVDR.[K]	1xOxidation [M5]; 1xLabel:13C(6)15N(4) [R12]	0.00414797	0.00081157	1	2	2	Q00610	Q00610 [177-188]		0	1363.69								8185	Redundant	Heavy	Peak Found	High	High	-0.85	0.0007817	0.003474	2.98	31.61
	TRUE	High	[K].WLLLTGISAQQNR.[V]		9.27066e-06	9.84928e-05	1	1	1	Q00610	Q00610 [164-176]		0	1499.83								8285	Redundant	Light	High	Peak Found	High	-0.14	0.0001206	6.714e-06	2.74	61.77
	TRUE	High	[K].WLLLTGISAQQNR.[V]	1xLabel:13C(6)15N(4) [R13]	0.00114009	0.000339819	1	1	1	Q00610	Q00610 [164-176]		0	1509.84	1.215	0.574865	0	90.3	109.7	2.31875e+06	2.1645e+06	8285		Heavy	Peak Found	High	High	-0.36	0.0002891	0.0009249	3.04	61.77
TRUE	High	Master Protein	P63261	Actin, cytoplasmic 2 OS=Homo sapiens OX=9606 GN=ACTG1 PE=1 SV=1	0	281.294	53	16	124	1	375	41.8	5.48	429.71	16	Pf00022	71	ENSG00000184009	ACTG1	A8K7C2; hsa:71; P02571; P14104; P63261; P99022; Q5U032; Q96E67	Arrhythmogenic right ventricular cardiomyopathy; Pathogenic Escherichia coli infection; Common pathways underlying drug addiction; Myometrial relaxation and contraction pathways; Focal adhesion; Fas ligand pathway and stress induction of heat shock proteins; Striated muscle contraction pathway; VEGFA-VEGFR2 signaling pathway; Ebola virus pathway in host; Thermogenesis; Mechanoregulation and patho…	EPH-ephrin mediated repulsion of cells; RHO GTPases Activate Formins; Signaling by BRAF and RAF1 fusions; EPHB-mediated forward signaling; Signaling by moderate kinase activity BRAF mutants; Paradoxical activation of RAF signaling by kinase inactive BRAF; Signaling downstream of RAS mutants; Signaling by RAF1 mutants; MAP2K and MAPK activation; Signaling by high-kinase activity BRAF mutants; Clat…	Rap1 signaling pathway; Phagosome; Apoptosis; Hippo signaling pathway; Focal adhesion; Adherens junction; Tight junction; Platelet activation; Neutrophil extracellular trap formation; Leukocyte transendothelial migration; Thermogenesis; Regulation of actin cytoskeleton; Thyroid hormone signaling pathway; Oxytocin signaling pathway; Gastric acid secretion; Amyotrophic lateral sclerosis; Bacterial …	70	0	1.212	0.454799	2.1	90.5	109.5	4.97891e+06	4630705	High	High	1	Met-loss+Acetyl [N-Term]
	Checked	Confidence	Annotated Sequence	Modifications	Qvality PEP	Qvality q-value	# Protein Groups	# Proteins	# PSMs	Master Protein Accessions	Positions in Master Proteins	Modifications in Master Proteins	# Missed Cleavages	Theo. MH+ [Da]	Abundance Ratio: (Heavy) / (Light)	Abundance Ratio P-Value: (Heavy) / (Light)	Abundance Ratio Variability [%]: (Heavy) / (Light)	Abundances (Grouped): Light	Abundances (Grouped): Heavy	Abundance: F1: Light, Sample	Abundance: F1: Heavy, Sample	Precursor Quan Result ID	Quan Info	Quan Channel	Found in Sample: [S1] F1: Light, Sample	Found in Sample: [S3] F1: Heavy, Sample	Confidence (by Search Engine): Sequest HT	DeltaM [ppm] (by Search Engine): Sequest HT	Percolator q-Value (by Search Engine): Sequest HT	Percolator PEP (by Search Engine): Sequest HT	XCorr (by Search Engine): Sequest HT	Top Apex RT [min]
	TRUE	High	[R].AVFPSIVGRPR.[QH]	2xLabel:13C(6)15N(4) [R9; R11]	0.00282204	0.000632611	3	9	3	P60709; P68133; P63261	P60709 [29-39]; P68133 [31-41]; P63261 [29-39]		0	1218.72	1.023	0.967907	0	98.9	101.1	177056900	139138240	787	Shared	Heavy	Peak Found	High	High	0.19	0.0004992	0.002362	1.96	33.12
	TRUE	High	[R].DLTDYLMK.[I]		0.00352142	0.00071665	4	7	1	P60709; P68133; Q562R1; P63261	P60709 [184-191]; P68133 [186-193]; Q562R1 [185-192]; P63261 [184-191]		0	998.486	1.15	0.613245	0	93	107	29725652	26246546	1178	Shared	Light	High	Peak Found	High	-0.05	0.0006511	0.002954	2.15	53.27
	TRUE	High	[R].DLTDYLMK.[I]	1xLabel:13C(6)15N(2) [K8]	0.00634032	0.000965695	4	7	1	P60709; P68133; Q562R1; P63261	P60709 [184-191]; P68133 [186-193]; Q562R1 [185-192]; P63261 [184-191]		0	1006.5								1178	Redundant	Heavy	Peak Found	High	High	-0.08	0.0008827	0.005232	2.35	53.27
	TRUE	High	[R].DLTDYLMK.[I]	1xOxidation [M7]	0.0439801	0.00366907	4	7	1	P60709; P68133; Q562R1; P63261	P60709 [184-191]; P68133 [186-193]; Q562R1 [185-192]; P63261 [184-191]		0	1014.48	1.181	0.529209	0	91.7	108.3	27005514	24483384	1179	Shared	Light	High	Peak Found	High	-0.28	0.002942	0.0323	1.97	42.81
	TRUE	High	[R].DLTDYLMK.[I]	1xOxidation [M7]; 1xLabel:13C(6)15N(2) [K8]	0.00855117	0.00104825	4	7	1	P60709; P68133; Q562R1; P63261	P60709 [184-191]; P68133 [186-193]; Q562R1 [185-192]; P63261 [184-191]		0	1022.5								1179	Redundant	Heavy	Peak Found	High	High	-0.37	0.001011	0.006979	2.12	42.81
	TRUE	High	[K].DLYANTVLSGGTTMYPGIADR.[M]		4.67849e-08	9.84928e-05	2	2	5	P60709; P63261	P60709 [292-312]; P63261 [292-312]		0	2215.07								1189	Redundant	Light	High	Peak Found	High	-0.7	0.0001206	3.106e-08	5.15	64.35
	TRUE	High	[K].DLYANTVLSGGTTMYPGIADR.[M]	1xLabel:13C(6)15N(4) [R21]	4.87776e-09	9.84928e-05	2	2	3	P60709; P63261	P60709 [292-312]; P63261 [292-312]		0	2225.08	1.124	0.688563	0	94.1	105.9	36205923	3.12619e+07	1189	Shared	Heavy	Peak Found	High	High	0.31	0.0001206	3.11e-09	5.29	64.35
	TRUE	High	[K].DLYANTVLSGGTTMYPGIADR.[M]	1xOxidation [M14]	1.08825e-08	9.84928e-05	2	2	4	P60709; P63261	P60709 [292-312]; P63261 [292-312]		0	2231.06	1.079	0.836401	0	96.2	103.8	49563563	41056170	1188	Shared	Light	High	Peak Found	High	0.79	0.0001206	7.027e-09	6.11	58.18
	TRUE	High	[K].DLYANTVLSGGTTMYPGIADR.[M]	1xOxidation [M14]; 1xLabel:13C(6)15N(4) [R21]	4.51736e-09	9.84928e-05	2	2	3	P60709; P63261	P60709 [292-312]; P63261 [292-312]		0	2241.07								1188	Redundant	Heavy	Peak Found	High	High	0.14	0.0001206	2.884e-09	6.25	58.18
	TRUE	High	[K].DLYANTVLSGGTTMYPGIADR.[M]	1xDeamidated [N5]; 1xOxidation [M14]; 1xLabel:13C(6)15N(4) [R21]	8.00792e-07	9.84928e-05	2	2	1	P60709; P63261	P60709 [292-312]; P63261 [292-312]		0	2242.06								1187	No Quan Values	Heavy	Not Found	High	High	4.45	0.0001206	5.581e-07	4.67
	TRUE	High	[K].DSYVGDEAQSKR.[G]		0.00533426	0.000965695	3	6	1	P60709; P68133; P63261	P60709 [51-62]; P68133 [53-64]; P63261 [51-62]		1	1354.62	1.357	0.363339	0	84.9	115.1	57569.7	59983.8	1330	Shared	Light	High	Peak Found	High	-0.66	0.0008827	0.004435	2.35	12.56
	TRUE	High	[K].EITALAPSTMK.[I]		0.000254136	9.84928e-05	3	6	4	P60709; P68133; P63261	P60709 [316-326]; P68133 [318-328]; P63261 [316-326]		0	1161.62								1854	Redundant	Light	High	Peak Found	High	0.35	0.0001206	0.0001954	2.81	29.88
	TRUE	High	[K].EITALAPSTMK.[I]	1xLabel:13C(6)15N(2) [K11]	0.000361879	9.84928e-05	3	6	3	P60709; P68133; P63261	P60709 [316-326]; P68133 [318-328]; P63261 [316-326]		0	1169.63	1.031	0.99677	0	98.5	101.5	151104608	119665008	1854	Shared	Heavy	Peak Found	High	High	0.42	0.0001206	0.0002826	3.09	29.88
	TRUE	High	[K].EITALAPSTMK.[I]	1xOxidation [M10]	0.000182868	9.84928e-05	3	6	9	P60709; P68133; P63261	P60709 [316-326]; P68133 [318-328]; P63261 [316-326]		0	1177.61	0.913	0.567338	0	104.5	95.5	3.11803e+07	2.18726e+07	1855	Shared	Light	High	Peak Found	High	0.22	0.0001206	0.0001395	2.84	24.99
	TRUE	High	[K].EITALAPSTMK.[I]	1xOxidation [M10]; 1xLabel:13C(6)15N(2) [K11]	0.0180436	0.00153507	3	6	4	P60709; P68133; P63261	P60709 [316-326]; P68133 [318-328]; P63261 [316-326]		0	1185.63								1855	Redundant	Heavy	Peak Found	High	High	3.27	0.001416	0.01397	1.98	24.99
	TRUE	High	[R].HQGVMVGMGQK.[D]	1xOxidation [M8]	0.0173095	0.00153507	4	7	1	P60709; P68133; Q562R1; P63261	P60709 [40-50]; P68133 [42-52]; Q562R1 [41-51]; P63261 [40-50]		0	1187.57								3041	No Quan Values	Light	High	Not Found	High	0.06	0.001416	0.01343	2.25
	TRUE	High	[R].HQGVMVGMGQKDSYVGDEAQSKR.[G]	1xOxidation [M8]	0.000853984	0.00021741	3	6	1	P60709; P68133; P63261	P60709 [40-62]; P68133 [42-64]; P63261 [40-62]		2	2523.17	1.427	0.262003	0	82.4	117.6	442769	485315	3042	Shared	Light	High	Peak Found	High	0.61	0.0002	0.0006849	3.91	15.39
	TRUE	High	[R].KDLYANTVLSGGTTMYPGIADR.[M]		4.09847e-06	9.84928e-05	2	2	2	P60709; P63261	P60709 [291-312]; P63261 [291-312]		1	2343.16	0.989	0.883016	0	100.6	99.4	6.68617e+06	5.07655e+06	3092	Shared	Light	High	Peak Found	High	-0.05	0.0001206	2.925e-06	5.52	53.27
	TRUE	High	[R].KDLYANTVLSGGTTMYPGIADR.[M]	1xOxidation [M15]	0.00068688	0.00021741	2	2	1	P60709; P63261	P60709 [291-312]; P63261 [291-312]		1	2359.16								3094	No Quan Values	Light	High	Not Found	High	-0.3	0.0002	0.0005476	4.05
	TRUE	High	[R].KDLYANTVLSGGTTMYPGIADR.[M]	1xLabel:13C(6)15N(2) [K1]; 1xLabel:13C(6)15N(4) [R22]	0.00019859	9.84928e-05	2	2	1	P60709; P63261	P60709 [291-312]; P63261 [291-312]		1	2361.19								3092	Redundant	Heavy	Peak Found	High	High	-0.33	0.0001206	0.0001516	4.53	53.27
	TRUE	High	[K].LCYVALDFEQEMATAASSSSLEK.[S]	1xCarbamidomethyl [C2]; 1xLabel:13C(6)15N(2) [K23]	0.00486656	0.000910608	2	3	1	P60709; P63261	P60709 [216-238]; P63261 [216-238]		0	2558.19								3413	No Quan Values	Heavy	Not Found	High	High	-0.33	0.0008524	0.004048	2.93
	TRUE	High	[R].LDLAGRDLTDYLMK.[I]	1xOxidation [M13]	0.0224175	0.00204583	4	7	1	P60709; P68133; Q562R1; P63261	P60709 [178-191]; P68133 [180-193]; Q562R1 [179-192]; P63261 [178-191]		1	1639.84	1.302	0.312426	0	86.9	113.1	6632160	6.63096e+06	3440	Shared	Light	High	Peak Found	High	-0.01	0.001781	0.0171	2.81	53.92
	TRUE	High	[K].IWHHTFYNELR.[V]		2.97326e-06	9.84928e-05	3	9	8	P60709; P68133; P63261	P60709 [85-95]; P68133 [87-97]; P63261 [85-95]		0	1515.75								4759	Redundant	Light	High	Peak Found	High	-0.3	0.0001206	2.107e-06	4.33	37.18
	TRUE	High	[K].IWHHTFYNELR.[V]	1xLabel:13C(6)15N(4) [R11]	4.48759e-06	9.84928e-05	3	9	10	P60709; P68133; P63261	P60709 [85-95]; P68133 [87-97]; P63261 [85-95]		0	1525.76	1.177	0.53908	0	91.9	108.1	8.21812e+07	7.42676e+07	4759	Shared	Heavy	Peak Found	High	High	0.01	0.0001206	3.208e-06	4.09	37.18
	TRUE	High	[-].MEEEIAALVIDNGSGMCK.[A]	1xCarbamidomethyl [C17]; 1xMet-loss+Acetyl [N-Term]	2.11226e-06	9.84928e-05	1	1	1	P63261	P63261 [1-18]	P63261 1xMet-loss+Acetyl [N-Term]	0	1877.86								5057	Redundant	Light	High	Peak Found	High	-0.27	0.0001206	1.497e-06	4.79	78.89
	TRUE	High	[-].MEEEIAALVIDNGSGMCK.[A]	1xCarbamidomethyl [C17]; 1xLabel:13C(6)15N(2) [K18]; 1xMet-loss+Acetyl [N-Term]	6.27268e-07	9.84928e-05	1	1	1	P63261	P63261 [1-18]	P63261 1xMet-loss+Acetyl [N-Term]	0	1885.88	1.195	0.655693	0	91.1	108.9	2.70369e+06	2.48197e+06	5057		Heavy	Peak Found	High	High	-0.67	0.0001206	4.359e-07	4.69	78.89
	TRUE	High	[-].MEEEIAALVIDNGSGMCK.[A]	1xCarbamidomethyl [C17]; 1xOxidation [M16]; 1xMet-loss+Acetyl [N-Term]	1.65457e-06	9.84928e-05	1	1	2	P63261	P63261 [1-18]	P63261 1xMet-loss+Acetyl [N-Term]	0	1893.86	1.23	0.541219	0	89.7	110.3	2.27523e+06	2.14874e+06	5059		Light	High	Peak Found	High	-0.4	0.0001206	1.164e-06	4.48	73.46
	TRUE	High	[R].MQKEITALAPSTMK.[I]		0.000116773	9.84928e-05	3	6	1	P60709; P68133; P63261	P60709 [313-326]; P68133 [315-328]; P63261 [313-326]		1	1548.81								5259	No Quan Values	Light	High	Not Found	High	0.49	0.0001206	8.853e-05	3.69
	TRUE	High	[KR].SYELPDGQVITIGNER.[F]		1.82413e-07	9.84928e-05	4	10	5	P60709; P68133; Q562R1; P63261	P60709 [239-254]; P68133 [241-256]; Q562R1 [240-255]; P63261 [239-254]		0	1790.89	0.984	0.821614	0	100.8	99.2	2.36206e+08	178421094	6893	Shared	Light	High	Peak Found	High	0.09	0.0001206	1.239e-07	4.64	56.11
	TRUE	High	[KR].SYELPDGQVITIGNER.[F]	1xLabel:13C(6)15N(4) [R16]	1.68909e-08	9.84928e-05	4	10	6	P60709; P68133; Q562R1; P63261	P60709 [239-254]; P68133 [241-256]; Q562R1 [240-255]; P63261 [239-254]		0	1800.9								6893	Redundant	Heavy	Peak Found	High	High	0.04	0.0001206	1.099e-08	4.34	56.11
	TRUE	High	[R].TTGIVMDSGDGVTHTVPIYEGYALPHAILR.[L]		9.66812e-07	9.84928e-05	2	2	4	P60709; P63261	P60709 [148-177]; P63261 [148-177]		0	3183.61	0.887	0.479576	0	106	94	28735882	19584965	7398	Shared	Light	High	Peak Found	High	-0.12	0.0001206	6.764e-07	3.18	64.26
	TRUE	High	[R].TTGIVMDSGDGVTHTVPIYEGYALPHAILR.[L]	1xLabel:13C(6)15N(4) [R30]	5.01757e-06	9.84928e-05	2	2	3	P60709; P63261	P60709 [148-177]; P63261 [148-177]		0	3193.62								7398	Redundant	Heavy	Peak Found	High	High	0.28	0.0001206	3.589e-06	3.26	64.26
	TRUE	High	[R].TTGIVMDSGDGVTHTVPIYEGYALPHAILR.[L]	1xOxidation [M6]	9.94034e-08	9.84928e-05	2	2	4	P60709; P63261	P60709 [148-177]; P63261 [148-177]		0	3199.61	0.983	0.821178	0	100.8	99.2	24957441	18849624	7397	Shared	Light	High	Peak Found	High	0.42	0.0001206	6.677e-08	4.34	60.81
	TRUE	High	[R].TTGIVMDSGDGVTHTVPIYEGYALPHAILR.[L]	1xOxidation [M6]; 1xLabel:13C(6)15N(4) [R30]	6.58668e-07	9.84928e-05	2	2	2	P60709; P63261	P60709 [148-177]; P63261 [148-177]		0	3209.62								7397	Redundant	Heavy	Peak Found	High	High	3.15	0.0001206	4.566e-07	5.55	60.81
	TRUE	High	[R].VAPEEHPVLLTEAPLNPK.[A]		2.64041e-07	9.84928e-05	2	2	5	P60709; P63261	P60709 [96-113]; P63261 [96-113]		0	1954.06								7560	Redundant	Light	High	Peak Found	High	0.05	0.0001206	1.805e-07	4.33	41.94
	TRUE	High	[R].VAPEEHPVLLTEAPLNPK.[A]	1xLabel:13C(6)15N(2) [K18]	3.23293e-06	9.84928e-05	2	2	5	P60709; P63261	P60709 [96-113]; P63261 [96-113]		0	1962.08	0.719	0.0909556	0	116.3	83.7	400474072	221243978	7560	Shared	Heavy	Peak Found	High	High	-0.8	0.0001206	2.3e-06	3.99	41.94
TRUE	High	Master Protein	P49327	Fatty acid synthase OS=Homo sapiens OX=9606 GN=FASN PE=1 SV=3	0	275.093	21	37	108	37	2511	273.3	6.44	345.17	37	Pf00107, Pf00109, Pf00550, Pf00698, Pf00975, Pf02801, Pf08242, Pf08659, Pf14765, Pf16197	2194	ENSG00000169710	FASN	hsa:2194; P49327; Q13479; Q16702; Q4LE83; Q6P4U5; Q6SS02; Q969R1; Q96C68; Q96IT0	AMP-activated protein kinase (AMPK) signaling; Sterol regulatory element-binding proteins (SREBP) signaling; SREBF and miR33 in cholesterol and lipid homeostasis; Liver X receptor pathway; Nuclear receptors meta-pathway; Fatty acid biosynthesis; Angiopoietin-like protein 8 regulatory pathway; Lipid metabolism pathway; Clear cell renal cell carcinoma pathways; Metabolic reprogramming in colon canc…	ChREBP activates metabolic gene expression; Activation of gene expression by SREBF (SREBP); Fatty acyl-CoA biosynthesis; NR1H2 & NR1H3 regulate gene expression linked to lipogenesis; Vitamin B5 (pantothenate) metabolism	Fatty acid biosynthesis; Metabolic pathways; Fatty acid metabolism; AMPK signaling pathway; Insulin signaling pathway	23	0	1.049	0.858191	19.47	96.8	103.2	3.23252e+08	2.64484e+08	High	High	1
	Checked	Confidence	Annotated Sequence	Modifications	Qvality PEP	Qvality q-value	# Protein Groups	# Proteins	# PSMs	Master Protein Accessions	Positions in Master Proteins	Modifications in Master Proteins	# Missed Cleavages	Theo. MH+ [Da]	Abundance Ratio: (Heavy) / (Light)	Abundance Ratio P-Value: (Heavy) / (Light)	Abundance Ratio Variability [%]: (Heavy) / (Light)	Abundances (Grouped): Light	Abundances (Grouped): Heavy	Abundance: F1: Light, Sample	Abundance: F1: Heavy, Sample	Precursor Quan Result ID	Quan Info	Quan Channel	Found in Sample: [S1] F1: Light, Sample	Found in Sample: [S3] F1: Heavy, Sample	Confidence (by Search Engine): Sequest HT	DeltaM [ppm] (by Search Engine): Sequest HT	Percolator q-Value (by Search Engine): Sequest HT	Percolator PEP (by Search Engine): Sequest HT	XCorr (by Search Engine): Sequest HT	Top Apex RT [min]
	TRUE	High	[R].AFEVSENGNLVVSGK.[V]	1xLabel:13C(6)15N(2) [K15]	0.0405116	0.00334887	1	1	1	P49327	P49327 [943-957]		0	1557.8	2.135	0.0196185	0	63.8	136.2	54804.1	89852.3	197		Heavy	Peak Found	High	High	0.4	0.002711	0.03003	2.18	117.29
	TRUE	High	[K].AGLYGLPR.[R]		0.00134259	0.000424254	1	1	2	P49327	P49327 [42-49]		0	846.483								269	Redundant	Light	High	Peak Found	High	0.28	0.0003475	0.001099	2.55	30.55
	TRUE	High	[K].AGLYGLPR.[R]	1xLabel:13C(6)15N(4) [R8]	0.000541005	0.00021741	1	1	1	P49327	P49327 [42-49]		0	856.491	1.224	0.455476	0	89.9	110.1	6.83806e+06	6428026	269		Heavy	Peak Found	High	High	0.47	0.0002	0.0004272	2.51	30.55
	TRUE	High	[K].DHRDNLEFFLAGIGR.[L]	2xLabel:13C(6)15N(4) [R3; R15]	0.0637463	0.00483692	1	1	1	P49327	P49327 [788-802]		1	1779.9								1062	No Quan Values	Heavy	Not Found	High	High	0.56	0.003777	0.04669	1.86
	TRUE	High	[R].DNLEFFLAGIGR.[L]		1.88816e-05	9.84928e-05	1	1	1	P49327	P49327 [791-802]		0	1351.7	1.099	0.766374	0	95.3	104.7	947553	799386	1221		Light	High	Peak Found	High	-0.55	0.0001206	1.383e-05	3.49	76.38
	TRUE	High	[R].DTSFEQHVLWHTGGK.[G]	1xLabel:13C(6)15N(2) [K15]	0.0792241	0.00577027	1	1	1	P49327	P49327 [1725-1739]		0	1749.84								1357	No Quan Values	Heavy	Not Found	High	High	-0.92	0.004448	0.05782	2.5
	TRUE	High	[K].EDGLAQQQTQLNLR.[S]		7.62578e-06	9.84928e-05	1	1	1	P49327	P49327 [2207-2220]		0	1613.82	1.274	0.323749	0	87.9	112.1	24442480	23918050	1543		Light	High	Peak Found	High	-0.31	0.0001206	5.495e-06	3.75	33.06
	TRUE	High	[K].EDGLAQQQTQLNLR.[S]	1xLabel:13C(6)15N(4) [R14]	9.66689e-06	9.84928e-05	1	1	2	P49327	P49327 [2207-2220]		0	1623.83								1543	Redundant	Heavy	Peak Found	High	High	0.18	0.0001206	7.003e-06	3.47	33.06
	TRUE	High	[K].EQGVTFPSGDIQEQLIR.[S]		0.00473213	0.00081157	1	1	1	P49327	P49327 [258-274]		0	1916.97	100	1e-17			200		3.11641e+06	1969		Light	High	Peak Found	High	-1.65	0.0007817	0.003954	2.84	56.67
	TRUE	High	[K].EQGVTFPSGDIQEQLIR.[S]	1xLabel:13C(6)15N(4) [R17]	0.00150027	0.000424254	1	1	1	P49327	P49327 [258-274]		0	1926.98								1969	Redundant	Heavy	Not Found	High	High	-1.36	0.0003475	0.001228	3.13	56.67
	TRUE	High	[R].FDASFFGVHPK.[Q]		4.23676e-05	9.84928e-05	1	1	2	P49327	P49327 [60-70]		0	1251.62	1.252	0.405666	0	88.8	111.2	8726254	8390317	2176		Light	High	Peak Found	High	0.11	0.0001206	3.156e-05	3.21	45.8
	TRUE	High	[R].FDASFFGVHPK.[Q]	1xLabel:13C(6)15N(2) [K11]	3.12208e-06	9.84928e-05	1	1	2	P49327	P49327 [60-70]		0	1259.63								2176	Redundant	Heavy	Peak Found	High	High	0.16	0.0001206	2.212e-06	2.36	45.8
	TRUE	High	[R].FPQLDSTSFANSR.[D]		8.1199e-06	9.84928e-05	1	1	2	P49327	P49327 [1712-1724]		0	1469.7	1.094	0.783492	0	95.5	104.5	23245032	19537892	2302		Light	High	Peak Found	High	0.23	0.0001206	5.85e-06	3.67	44.05
	TRUE	High	[R].FPQLDSTSFANSR.[D]	1xLabel:13C(6)15N(4) [R13]	5.55751e-05	9.84928e-05	1	1	2	P49327	P49327 [1712-1724]		0	1479.71								2302	Redundant	Heavy	Peak Found	High	High	0.26	0.0001206	4.157e-05	3.26	44.05
	TRUE	High	[K].GLVQALQTK.[V]		0.00157047	0.000424254	1	1	1	P49327	P49327 [1143-1151]		0	957.573	1.402	0.237866	0	83.3	116.7	4.05758e+06	4367497	2724		Light	High	Peak Found	High	-0.37	0.0003475	0.001291	1.99	26.62
	TRUE	High	[K].GLVQALQTK.[V]	1xLabel:13C(6)15N(2) [K9]	0.0014905	0.000424254	1	1	1	P49327	P49327 [1143-1151]		0	965.587								2724	Redundant	Heavy	Peak Found	High	High	0.04	0.0003475	0.001224	2.36	26.62
	TRUE	High	[R].GNAGQSNYGFANSAMER.[I]		1.6776e-07	9.84928e-05	1	1	2	P49327	P49327 [2027-2043]		0	1773.76	1.086	0.808035	0	95.9	104.1	6.15429e+06	5.13287e+06	2739		Light	High	Peak Found	High	-0.12	0.0001206	1.138e-07	4.89	29.77
	TRUE	High	[R].GNAGQSNYGFANSAMER.[I]	1xLabel:13C(6)15N(4) [R17]	1.28686e-07	9.84928e-05	1	1	2	P49327	P49327 [2027-2043]		0	1783.77								2739	Redundant	Heavy	Peak Found	High	High	-0.31	0.0001206	8.697e-08	4.9	29.77
	TRUE	High	[R].GTPLISPLIK.[W]		0.0326608	0.00269571	1	1	1	P49327	P49327 [826-835]		0	1038.66	0.989	0.803801	0	100.5	99.5	14848189	11278565	2886		Light	High	Peak Found	High	0.73	0.002241	0.02439	1.82	45.39
	TRUE	High	[K].GVDLVLNSLAEEK.[L]		1.65389e-05	9.84928e-05	1	1	2	P49327	P49327 [1740-1752]		0	1386.75	1.19	0.526268	0	91.3	108.7	9758914	8919346	2905		Light	High	Peak Found	High	0.12	0.0001206	1.21e-05	4.31	53.77
	TRUE	High	[K].GVDLVLNSLAEEK.[L]	1xLabel:13C(6)15N(2) [K13]	7.57276e-06	9.84928e-05	1	1	2	P49327	P49327 [1740-1752]		0	1394.76								2905	Redundant	Heavy	Peak Found	High	High	0.53	0.0001206	5.476e-06	3.44	53.77
	TRUE	High	[R].HFLLEEDKPEEPTAHAFVSTLTR.[G]	1xLabel:13C(6)15N(2) [K8]; 1xLabel:13C(6)15N(4) [R23]	0.0014808	0.000424254	1	1	1	P49327	P49327 [1516-1538]		0	2685.36	0.951	0.775587	0	102.5	97.5	3793573	2.77117e+06	2994		Heavy	Peak Found	High	High	-0.01	0.0003475	0.001211	2.54	56.29
	TRUE	High	[R].LFDHPESPTPNPTEPLFLAQAEVYK.[E]		7.26261e-07	9.84928e-05	1	1	2	P49327	P49327 [968-992]		0	2840.41	0.682	0.115406	0	118.9	81.1	7.10245e+06	3.72043e+06	3594		Light	High	Peak Found	High	-0.51	0.0001206	5.047e-07	6.13	67.38
	TRUE	High	[R].LFDHPESPTPNPTEPLFLAQAEVYK.[E]	1xLabel:13C(6)15N(2) [K25]	5.25673e-05	9.84928e-05	1	1	2	P49327	P49327 [968-992]		0	2848.43								3594	Redundant	Heavy	Peak Found	High	High	-0.08	0.0001206	3.929e-05	4.89	67.38
	TRUE	High	[R].LHLSGIDANPNALFPPVEFPAPR.[G]		2.37828e-06	9.84928e-05	1	1	2	P49327	P49327 [803-825]		0	2472.3	0.01	1e-17		200		6.88339e+06		3817		Light	High	Not Found	High	-0.04	0.0001206	1.678e-06	3.89	72.29
	TRUE	High	[R].LHLSGIDANPNALFPPVEFPAPR.[G]	1xLabel:13C(6)15N(4) [R23]	0.000114374	9.84928e-05	1	1	2	P49327	P49327 [803-825]		0	2482.31								3817	Redundant	Heavy	Peak Found	High	High	0.15	0.0001206	8.643e-05	3.35	72.29
	TRUE	High	[R].LNSVQSSERPLFLVHPIEGSTTVFHSLASR.[L]		4.70297e-05	9.84928e-05	1	1	2	P49327	P49327 [2234-2263]		0	3308.74	0.997	0.831939	0	100.1	99.9	1.02931e+07	7.88161e+06	4236		Light	High	Peak Found	High	0.63	0.0001206	3.493e-05	4.26	63.11
	TRUE	High	[R].LNSVQSSERPLFLVHPIEGSTTVFHSLASR.[L]	2xLabel:13C(6)15N(4) [R9; R30]	5.29342e-05	9.84928e-05	1	1	1	P49327	P49327 [2234-2263]		0	3328.76								4236	Redundant	Heavy	Peak Found	High	High	0.94	0.0001206	3.943e-05	3.7	62.98
	TRUE	High	[K].LPEDPLLSGLLDSPALK.[A]		6.82054e-07	9.84928e-05	1	1	2	P49327	P49327 [1209-1225]		0	1777.99	0.826	0.455279	0	109.5	90.5	2.7812e+06	1.76384e+06	4267		Light	High	Peak Found	High	-0.57	0.0001206	4.737e-07	4.19	78.72
	TRUE	High	[K].LPEDPLLSGLLDSPALK.[A]	1xLabel:13C(6)15N(2) [K17]	6.8683e-07	9.84928e-05	1	1	2	P49327	P49327 [1209-1225]		0	1786.01								4267	Redundant	Heavy	Peak Found	High	High	0.17	0.0001206	4.762e-07	4.16	78.72
	TRUE	High	[R].LQVVDQPLPVR.[G]		0.00164398	0.000424254	1	1	2	P49327	P49327 [374-384]		0	1263.74	0.997	0.87108	0	100.2	99.8	22305178	17077330	4399		Light	High	Peak Found	High	0.1	0.0003475	0.001357	2.42	39.02
	TRUE	High	[R].LQVVDQPLPVR.[G]	1xLabel:13C(6)15N(4) [R11]	3.20674e-05	9.84928e-05	1	1	2	P49327	P49327 [374-384]		0	1273.75								4399	Redundant	Heavy	Peak Found	High	High	0.22	0.0001206	2.371e-05	3.53	39.02
	TRUE	High	[K].MVVPGLDGAQIPR.[D]		0.00389966	0.00071665	1	1	1	P49327	P49327 [1159-1171]		0	1352.74	1.059	0.959674	0	97.2	102.8	5.12881e+06	4169417	5423		Light	High	Peak Found	High	-0.39	0.0007168	0.003254	2.13	50.96
	TRUE	High	[R].QGVQVQVSTSNISSLEGAR.[G]		1.11161e-06	9.84928e-05	1	1	2	P49327	P49327 [1935-1953]		0	1960.01								5942	Redundant	Light	High	Peak Found	High	-0.24	0.0001206	7.795e-07	3.35	43.82
	TRUE	High	[R].QGVQVQVSTSNISSLEGAR.[G]	1xLabel:13C(6)15N(4) [R19]	1.53232e-06	9.84928e-05	1	1	2	P49327	P49327 [1935-1953]		0	1970.02	1.246	0.512584	0	89.1	110.9	2.24108e+06	2.14385e+06	5942		Heavy	Peak Found	High	High	1.14	0.0001206	1.076e-06	4.04	43.82
	TRUE	High	[R].RPTPQDSPIFLPVDDTSFR.[W]		0.00888595	0.00104825	1	1	1	P49327	P49327 [1405-1423]		0	2188.1	0.791	0.295465	0	111.7	88.3	6.31052e+06	3.83179e+06	6208		Light	High	Peak Found	High	-0.36	0.001011	0.007202	2.09	58.47
	TRUE	High	[R].RPTPQDSPIFLPVDDTSFR.[W]	2xLabel:13C(6)15N(4) [R1; R19]	0.00441396	0.00081157	1	1	1	P49327	P49327 [1405-1423]		0	2208.12								6208	Redundant	Heavy	Peak Found	High	High	-0.17	0.0007817	0.003682	3.57	58.47
	TRUE	High	[R].RVYATILNAGTNTDGFKEQGVTFPSGDIQEQLIR.[S]	1xDeamidated [Q31]; 1xLabel:13C(6)15N(2) [K17]; 2xLabel:13C(6)15N(4) [R1; R34]	0.00161206	0.000424254	1	1	1	P49327	P49327 [241-274]		2	3767.92								6232	No Quan Values	Heavy	Not Found	High	High	2.95	0.0003475	0.001325	4.71
	TRUE	High	[R].SLLVNPEGPTLMR.[L]		0.0154181	0.00146171	1	1	1	P49327	P49327 [2221-2233]		0	1426.77	0.934	0.639427	0	103.4	96.6	41190748	29540325	6546		Light	High	Peak Found	High	-0.62	0.001368	0.01203	2.67	50.63
	TRUE	High	[R].SLLVNPEGPTLMR.[L]	1xLabel:13C(6)15N(4) [R13]	0.0017323	0.000424254	1	1	2	P49327	P49327 [2221-2233]		0	1436.78								6546	Redundant	Heavy	Peak Found	High	High	-0.08	0.0003475	0.001426	2.79	51.63
	TRUE	High	[R].SLLVNPEGPTLMR.[L]	1xOxidation [M12]	0.000530312	0.00021741	1	1	3	P49327	P49327 [2221-2233]		0	1442.77	1.037	0.986797	0	98.2	101.8	10932769	8708326	6547		Light	High	Peak Found	High	-0.25	0.0002	0.0004189	2.47	42
	TRUE	High	[R].SLYQSAGVAPESFEYIEAHGTGTK.[V]		0.000227789	9.84928e-05	1	1	3	P49327	P49327 [275-298]		0	2542.21								6589	Redundant	Light	High	Peak Found	High	0.03	0.0001206	0.0001747	3.26	53.12
	TRUE	High	[R].SLYQSAGVAPESFEYIEAHGTGTK.[V]	1xLabel:13C(6)15N(2) [K24]	8.40878e-07	9.84928e-05	1	1	2	P49327	P49327 [275-298]		0	2550.22	1	0.881427	0	100	100	23002894	17660952	6589		Heavy	Peak Found	High	High	1.46	0.0001206	5.831e-07	5.28	53.12
	TRUE	High	[K].SNMGHPEPASGLAALAK.[V]		0.00945345	0.00112166	1	1	1	P49327	P49327 [327-343]		0	1650.83	0.89	0.561048	0	105.8	94.2	6938144	4742031	6628		Light	High	Peak Found	High	-0.58	0.00106	0.007678	2.78
	TRUE	High	[K].SNMGHPEPASGLAALAK.[V]	1xLabel:13C(6)15N(2) [K17]	0.00522195	0.000965695	1	1	2	P49327	P49327 [327-343]		0	1658.84								6628	Redundant	Heavy	Peak Found	High	High	-0.13	0.0008827	0.004356	3.17	31.29
	TRUE	High	[K].SNMGHPEPASGLAALAK.[V]	1xOxidation [M3]	5.9164e-05	9.84928e-05	1	1	2	P49327	P49327 [327-343]		0	1666.82	0.861	0.470201	0	107.5	92.5	4537260	3.00065e+06	6629		Light	High	Peak Found	High	0.12	0.0001206	4.416e-05	3.49	26.73
	TRUE	High	[K].SNMGHPEPASGLAALAK.[V]	1xOxidation [M3]; 1xLabel:13C(6)15N(2) [K17]	0.00533426	0.000965695	1	1	1	P49327	P49327 [327-343]		0	1674.84								6629	Redundant	Heavy	Peak Found	High	High	0.21	0.0008827	0.004448	2.68	26.73
	TRUE	High	[K].VGDPQELNGITR.[A]		0.000342817	9.84928e-05	1	1	1	P49327	P49327 [299-310]		0	1298.67	1.114	0.720997	0	94.6	105.4	30855626	26394882	7726		Light	High	Peak Found	High	0.34	0.0001206	0.0002669	2.69	26.99
	TRUE	High	[R].VLEALLPLKGLEER.[V]		0.0443419	0.00374389	1	1	1	P49327	P49327 [2383-2396]		1	1579.94	1.039	0.943189	0	98.1	101.9	1.65767e+06	1.32249e+06	7844		Light	High	Peak Found	High	0.03	0.002995	0.03276	2.04	61.1
	TRUE	High	[K].VVEVLAGHGHLYSR.[I]	1xLabel:13C(6)15N(4) [R14]	0.0249959	0.00211525	1	1	1	P49327	P49327 [1242-1255]		0	1546.84	1.316	0.308332	0	86.3	113.7	3768064	3.80895e+06	8183		Heavy	Peak Found	High	High	-0.26	0.001829	0.01892	2.49	24.97
	TRUE	High	[K].VVVQVLAEEPEAVLK.[G]		4.06344e-05	9.84928e-05	1	1	1	P49327	P49327 [1852-1866]		0	1622.94								8215	Redundant	Light	High	Peak Found	High	-0.17	0.0001206	3.027e-05	3.78	57.3
	TRUE	High	[K].VVVQVLAEEPEAVLK.[G]	1xLabel:13C(6)15N(2) [K15]	5.18411e-05	9.84928e-05	1	1	1	P49327	P49327 [1852-1866]		0	1630.95	0.915	0.655418	0	104.5	95.5	6160892	4328048	8215		Heavy	Peak Found	High	High	-0.87	0.0001206	3.856e-05	3.31	57.3
	TRUE	High	[K].VVVQVLAEEPEAVLKGAKPK.[L]		0.0632441	0.00467883	1	1	1	P49327	P49327 [1852-1871]		1	2104.24								8216	No Quan Values	Light	High	Not Found	High	0.26	0.003665	0.04603	2.58
	TRUE	High	[K].VYQWDDPDPR.[L]		0.00507637	0.000965695	1	1	2	P49327	P49327 [958-967]		0	1290.57	0.989	0.801759	0	100.6	99.4	10642969	8.08217e+06	8243		Light	High	Peak Found	High	-0.26	0.0008524	0.004229	2.28	33.2
	TRUE	High	[K].VYQWDDPDPR.[L]	1xLabel:13C(6)15N(4) [R10]	0.00111061	0.000339819	1	1	2	P49327	P49327 [958-967]		0	1300.58								8243	Redundant	Heavy	Peak Found	High	High	0.52	0.0002891	0.0009	2.67	33.2
	TRUE	High	[R].WKAGLYGLPR.[R]		0.000268402	9.84928e-05	1	1	2	P49327	P49327 [40-49]		1	1160.66	1.379	0.333415	0	84.1	115.9	2.4662e+06	2.61097e+06	8270		Light	High	Peak Found	High	-0.02	0.0001206	0.0002076	3.22	39.09
	TRUE	High	[R].WLSTSIPEAQWHSSLAR.[T]	1xLabel:13C(6)15N(4) [R17]	0.00652863	0.000965695	1	1	2	P49327	P49327 [712-728]		0	1979	1.245	0.398335	0	89.1	110.9	9147758	8747362	8287		Heavy	Peak Found	High	High	0.21	0.0008827	0.005402	2.41	53.13
	TRUE	High	[K].WTSQDSLLGMEFSGR.[D]		0.0168843	0.00153507	1	1	1	P49327	P49327 [1592-1606]		0	1713.79								8305	Redundant	Light	High	Peak Found	High	-0.99	0.001416	0.01316	3.24	62.03
	TRUE	High	[K].WTSQDSLLGMEFSGR.[D]	1xLabel:13C(6)15N(4) [R15]	6.61232e-05	9.84928e-05	1	1	1	P49327	P49327 [1592-1606]		0	1723.8	12.44	1e-17	0	14.9	185.1	463618	4429291	8305		Heavy	Peak Found	High	High	-1.18	0.0001206	4.964e-05	2.99	62.03
TRUE	High	Master Protein	Q07065	Cytoskeleton-associated protein 4 OS=Homo sapiens OX=9606 GN=CKAP4 PE=1 SV=2	0	274.286	55	25	90	25	602	66	5.92	308.92	25		10970	ENSG00000136026	CKAP4	hsa:10970; Q07065; Q504S5; Q53ES6		Neutrophil degranulation; Regulation of Insulin-like Growth Factor (IGF) transport and uptake by Insulin-like Growth Factor Binding Proteins (IGFBPs); Post-translational protein phosphorylation; RND2 GTPase cycle; RND3 GTPase cycle; Surfactant metabolism	Protein processing in endoplasmic reticulum	7	0	1.006	0.986107	6.13	100.6	99.4	4.02733e+08	3.05662e+08	High	High	1
	Checked	Confidence	Annotated Sequence	Modifications	Qvality PEP	Qvality q-value	# Protein Groups	# Proteins	# PSMs	Master Protein Accessions	Positions in Master Proteins	Modifications in Master Proteins	# Missed Cleavages	Theo. MH+ [Da]	Abundance Ratio: (Heavy) / (Light)	Abundance Ratio P-Value: (Heavy) / (Light)	Abundance Ratio Variability [%]: (Heavy) / (Light)	Abundances (Grouped): Light	Abundances (Grouped): Heavy	Abundance: F1: Light, Sample	Abundance: F1: Heavy, Sample	Precursor Quan Result ID	Quan Info	Quan Channel	Found in Sample: [S1] F1: Light, Sample	Found in Sample: [S3] F1: Heavy, Sample	Confidence (by Search Engine): Sequest HT	DeltaM [ppm] (by Search Engine): Sequest HT	Percolator q-Value (by Search Engine): Sequest HT	Percolator PEP (by Search Engine): Sequest HT	XCorr (by Search Engine): Sequest HT	Top Apex RT [min]
	TRUE	High	[K].ASVSQVEADLK.[M]		0.0293037	0.00254153	1	1	1	Q07065	Q07065 [541-551]		0	1146.6	0.997	0.84243	0	100.1	99.9	14774036	11316427	701		Light	High	Peak Found	High	-0.54	0.002134	0.02205	1.91	28.62
	TRUE	High	[R].DFTSLENTVEER.[L]		0.00018413	9.84928e-05	1	1	1	Q07065	Q07065 [229-240]		0	1439.66	0.887	0.479015	0	106	94	18705236	12746112	1003		Light	High	Peak Found	High	1.14	0.0001206	0.0001413	3.19	47.26
	TRUE	High	[R].DFTSLENTVEER.[L]	1xLabel:13C(6)15N(4) [R12]	1.19169e-05	9.84928e-05	1	1	1	Q07065	Q07065 [229-240]		0	1449.67								1003	Redundant	Heavy	Peak Found	High	High	-0.1	0.0001206	8.634e-06	2.97	47.26
	TRUE	High	[K].DLSDGIHVVK.[D]		0.00572918	0.000965695	1	1	1	Q07065	Q07065 [214-223]		0	1082.58	0.998	0.841183	0	100.1	99.9	12686783	9727429	1168		Light	High	Peak Found	High	0.25	0.0008827	0.004746	1.78	25.59
	TRUE	High	[K].DLSDGIHVVK.[D]	1xLabel:13C(6)15N(2) [K10]	0.035492	0.00276793	1	1	1	Q07065	Q07065 [214-223]		0	1090.6								1168	Redundant	Heavy	Peak Found	High	High	-0.35	0.002292	0.02638	1.83	25.59
	TRUE	High	[R].EELGQGLQGVEQK.[V]		2.18583e-05	9.84928e-05	1	1	2	Q07065	Q07065 [149-161]		0	1414.72	1	0.882725	0	100	100	26718524	20520912	1610		Light	High	Peak Found	High	-0.06	0.0001206	1.605e-05	3.8	27.71
	TRUE	High	[R].EELGQGLQGVEQK.[V]	1xLabel:13C(6)15N(2) [K13]	1.1834e-05	9.84928e-05	1	1	2	Q07065	Q07065 [149-161]		0	1422.73								1610	Redundant	Heavy	Peak Found	High	High	0.08	0.0001206	8.572e-06	3.66	27.71
	TRUE	High	[R].ELVSLKQEQQAFK.[E]		0.00533426	0.000965695	1	1	1	Q07065	Q07065 [327-339]		1	1547.84								1879	No Quan Values	Light	High	Not Found	High	1.04	0.0008827	0.00444	3.28
	TRUE	High	[R].ERDFTSLENTVEER.[L]		0.0117923	0.00130915	1	1	3	Q07065	Q07065 [227-240]		1	1724.81	1.069	0.870467	0	96.7	103.3	1.80535e+07	1.48166e+07	1994		Light	High	Peak Found	High	-0.05	0.001196	0.0094	2.03	36.75
	TRUE	High	[R].ERDFTSLENTVEER.[L]	2xLabel:13C(6)15N(4) [R2; R14]	0.000677855	0.00021741	1	1	3	Q07065	Q07065 [227-240]		1	1744.83								1994	Redundant	Heavy	Peak Found	High	High	0.06	0.0002	0.0005393	3.26	36.75
	TRUE	High	[K].GAHPSGGADDVAKKPPPAPQQPPPPPAPHPQQHPQQHPQNQAHGK.[G]		0.0145571	0.00146171	1	1	2	Q07065	Q07065 [22-66]		1	4656.31	0.232	7.57439e-06	0	162.3	37.7	1.32855e+06	236991	2415		Light	High	Peak Found	High	0.34	0.001368	0.0114	2.83	14.85
	TRUE	High	[K].GAHPSGGADDVAKKPPPAPQQPPPPPAPHPQQHPQQHPQNQAHGK.[G]	1xDeamidated [Q41]	0.0127803	0.00137984	1	1	1	Q07065	Q07065 [22-66]		1	4657.29	0.01	1e-17		200		323270		2413		Light	High	Not Found	High	4.38	0.001254	0.01011	3.3	15.81
	TRUE	High	[K].GAHPSGGADDVAKKPPPAPQQPPPPPAPHPQQHPQQHPQNQAHGK.[G]	1xDeamidated [Q20]; 3xLabel:13C(6)15N(2) [K13; K14; K45]	0.0262841	0.0021999	1	1	1	Q07065	Q07065 [22-66]		1	4681.34								2413	Redundant	Heavy	Peak Found	High	High	4.47	0.001829	0.01979	3.8
	TRUE	High	[K].GLLDDLRNDLDR.[L]	2xLabel:13C(6)15N(4) [R7; R12]	0.0189678	0.0016188	1	1	1	Q07065	Q07065 [579-590]		1	1434.75	1.006	0.870543	0	99.7	100.3	3.49353e+06	2.70005e+06	2674		Heavy	Peak Found	High	High	0.33	0.001475	0.01467	2.13	63.98
	TRUE	High	[K].KPPPAPQQPPPPPAPHPQQHPQQHPQNQAHGK.[G]		0.0521843	0.00403872	1	1	1	Q07065	Q07065 [35-66]		0	3493.77	0.2	8.86599e-08	0	166.7	33.3	2620371	401780	3208		Light	High	Peak Found	High	0.71	0.003203	0.03823	1.91	12.48
	TRUE	High	[K].KPPPAPQQPPPPPAPHPQQHPQQHPQNQAHGK.[G]	1xDeamidated [Q]	5.68896e-06	9.84928e-05	1	1	3	Q07065	Q07065 [35-66]		0	3494.76	0.255	2.98916e-05	0	159.4	40.6	1.15976e+06	227163	3209		Light	High	Peak Found	High	4.27	0.0001206	4.075e-06	5.65	12.48
	TRUE	High	[R].LALQALTEK.[L]		0.0133084	0.00137984	1	1	2	Q07065	Q07065 [347-355]		0	986.588	1.09	0.797658	0	95.7	104.3	23690030	19833870	3322		Light	High	Peak Found	High	0.29	0.001311	0.01049	1.95	33.35
	TRUE	High	[R].LALQALTEK.[L]	1xLabel:13C(6)15N(2) [K9]	0.00500532	0.000910608	1	1	2	Q07065	Q07065 [347-355]		0	994.602								3322	Redundant	Heavy	Peak Found	High	High	0.25	0.0008524	0.004167	2.15	33.35
	TRUE	High	[R].LEGLGSSEADQDGLASTVR.[S]		2.53095e-10	9.84928e-05	1	1	2	Q07065	Q07065 [455-473]		0	1904.92	1.018	0.950477	0	99.1	100.9	39931448	31233456	3528		Light	High	Peak Found	High	0.04	0.0001206	1.544e-10	5.73	40.21
	TRUE	High	[R].LEGLGSSEADQDGLASTVR.[S]	1xLabel:13C(6)15N(4) [R19]	9.14187e-08	9.84928e-05	1	1	2	Q07065	Q07065 [455-473]		0	1914.93								3528	Redundant	Heavy	Peak Found	High	High	-0.01	0.0001206	6.15e-08	5.36	40.21
	TRUE	High	[R].LQHVEDGVLSMQVASAR.[Q]		4.58157e-08	9.84928e-05	1	1	2	Q07065	Q07065 [413-429]		0	1839.94	1.079	0.857067	0	96.2	103.8	12006436	9948098	4352		Light	High	Peak Found	High	0.29	0.0001206	3.037e-08	4.46	38.81
	TRUE	High	[R].LQHVEDGVLSMQVASAR.[Q]	1xLabel:13C(6)15N(4) [R17]	0.000235722	9.84928e-05	1	1	1	Q07065	Q07065 [413-429]		0	1849.95								4352	Redundant	Heavy	Peak Found	High	High	-1.41	0.0001206	0.0001812	4.12
	TRUE	High	[R].LQHVEDGVLSMQVASAR.[Q]	1xOxidation [M11]	1.98369e-06	9.84928e-05	1	1	2	Q07065	Q07065 [413-429]		0	1855.93	0.968	0.803066	0	101.6	98.4	8107757	6.02506e+06	4353		Light	High	Peak Found	High	-2.6	0.0001206	1.401e-06	5	29.32
	TRUE	High	[R].LQHVEDGVLSMQVASAR.[Q]	1xOxidation [M11]; 1xLabel:13C(6)15N(4) [R17]	7.84202e-07	9.84928e-05	1	1	1	Q07065	Q07065 [413-429]		0	1865.94								4353	Redundant	Heavy	Peak Found	High	High	0.29	0.0001206	5.459e-07	3.89
	TRUE	High	[K].LQNEILKDLSDGIHVVK.[D]		0.000655795	0.00021741	1	1	1	Q07065	Q07065 [207-223]		1	1921.08								4365	No Quan Values	Light	High	Not Found	High	-1.06	0.0002	0.0005213	3.39
	TRUE	High	[R].QREELGQGLQGVEQK.[V]		5.23207e-06	9.84928e-05	1	1	2	Q07065	Q07065 [147-161]		1	1698.88	1.045	0.971111	0	97.8	102.2	1.34336e+07	1.07828e+07	6062		Light	High	Peak Found	High	0.44	0.0001206	3.764e-06	3.94	21.42
	TRUE	High	[R].QREELGQGLQGVEQK.[V]	1xLabel:13C(6)15N(2) [K15]; 1xLabel:13C(6)15N(4) [R2]	0.00061376	0.00021741	1	1	1	Q07065	Q07065 [147-161]		1	1716.9								6062	Redundant	Heavy	Peak Found	High	High	-0.02	0.0002	0.0004878	4.6	21.39
	TRUE	High	[R].QTESLESLLSK.[S]		0.00084281	0.00021741	1	1	2	Q07065	Q07065 [430-440]		0	1234.65	0.997	0.870206	0	100.2	99.8	23459274	17956674	6091		Light	High	Peak Found	High	0.07	0.0002	0.0006758	2.68	46.48
	TRUE	High	[R].QTESLESLLSK.[S]	1xLabel:13C(6)15N(2) [K11]	0.0170247	0.00153507	1	1	1	Q07065	Q07065 [430-440]		0	1242.67								6091	Redundant	Heavy	Peak Found	High	High	0.43	0.001416	0.01322	2.3	46.48
	TRUE	High	[K].SDSHGPKEDGGFRHSEAFEALQQK.[S]		0.000609704	0.00021741	1	1	1	Q07065	Q07065 [382-405]		2	2657.23								6310	No Quan Values	Light	High	Not Found	High	1.27	0.0002	0.0004827	3.36
	TRUE	High	[R].SEESVSRLPEEIR.[R]		0.00533426	0.000965695	1	1	1	Q07065	Q07065 [359-371]		1	1530.78	0.881	0.481984	0	106.3	93.7	5.52717e+06	3.73925e+06	6331		Light	High	Peak Found	High	-0.62	0.0008827	0.004436	2.61	26.96
	TRUE	High	[R].SEESVSRLPEEIR.[R]	2xLabel:13C(6)15N(4) [R7; R13]	0.10887	0.00735611	1	1	1	Q07065	Q07065 [359-371]		1	1550.79								6331	Redundant	Heavy	Peak Found	High	High	0.34	0.005651	0.0797	2.17	26.96
	TRUE	High	[R].SEESVSRLPEEIRR.[L]		0.00463405	0.00081157	1	1	2	Q07065	Q07065 [359-372]		2	1686.88	1.022	0.964336	0	98.9	101.1	20719154	16266355	6332		Light	High	Peak Found	High	-0.13	0.0007817	0.003865	3.63	22.15
	TRUE	High	[K].SREWDMEALR.[S]	2xLabel:13C(6)15N(4) [R2; R10]	0.0034507	0.00071665	1	1	2	Q07065	Q07065 [302-311]		1	1312.62	1.046	0.931654	0	97.8	102.2	8.3103e+06	6.67487e+06	6717		Heavy	Peak Found	High	High	-0.92	0.0006511	0.00289	2.68	32.77
	TRUE	High	[K].SSSSSSASAAAAAAAASSSASCSRR.[L]	1xCarbamidomethyl [C22]	0.0861002	0.0061531	1	1	1	Q07065	Q07065 [79-103]		1	2246.01								6789	No Quan Values	Light	High	Not Found	High	1.44	0.004782	0.06273	2.73
	TRUE	High	[R].STLQTMESDIYTEVR.[E]		1.76181e-06	9.84928e-05	1	1	2	Q07065	Q07065 [312-326]		0	1772.84								6819	Redundant	Light	High	Peak Found	High	-0.15	0.0001206	1.244e-06	4.44	58.4
	TRUE	High	[R].STLQTMESDIYTEVR.[E]	1xLabel:13C(6)15N(4) [R15]	1.15913e-06	9.84928e-05	1	1	2	Q07065	Q07065 [312-326]		0	1782.85	1.153	0.617867	0	92.9	107.1	11856246	10501174	6819		Heavy	Peak Found	High	High	-0.68	0.0001206	8.107e-07	4.33	58.4
	TRUE	High	[R].STLQTMESDIYTEVR.[E]	1xOxidation [M6]	0.000387141	9.84928e-05	1	1	2	Q07065	Q07065 [312-326]		0	1788.83	1.052	0.921214	0	97.5	102.5	7119920	5753218	6820		Light	High	Peak Found	High	-0.37	0.0001206	0.0003011	3.09	39.23
	TRUE	High	[R].STLQTMESDIYTEVR.[E]	1xOxidation [M6]; 1xLabel:13C(6)15N(4) [R15]	1.21688e-05	9.84928e-05	1	1	1	Q07065	Q07065 [312-326]		0	1798.84								6820	Redundant	Heavy	Peak Found	High	High	0.26	0.0001206	8.844e-06	4.16	39.23
	TRUE	High	[R].SVGELPSTVESLQK.[V]		1.876e-06	9.84928e-05	1	1	2	Q07065	Q07065 [492-505]		0	1473.78	0.854	0.373967	0	107.9	92.1	47305092	31011270	6856		Light	High	Peak Found	High	-0.23	0.0001206	1.322e-06	3.86	39.3
	TRUE	High	[R].SVGELPSTVESLQK.[V]	1xLabel:13C(6)15N(2) [K14]	7.62578e-06	9.84928e-05	1	1	2	Q07065	Q07065 [492-505]		0	1481.79								6856	Redundant	Heavy	Peak Found	High	High	-0.34	0.0001206	5.51e-06	3.95	39.3
	TRUE	High	[R].TAVDSLVAYSVK.[I]		8.29162e-06	9.84928e-05	1	1	2	Q07065	Q07065 [555-566]		0	1252.68								6975	Redundant	Light	High	Peak Found	High	-0.1	0.0001206	5.983e-06	3.77	43.37
	TRUE	High	[R].TAVDSLVAYSVK.[I]	1xLabel:13C(6)15N(2) [K12]	1.63099e-05	9.84928e-05	1	1	2	Q07065	Q07065 [555-566]		0	1260.69	1.048	0.943058	0	97.7	102.3	21023520	16919774	6975		Heavy	Peak Found	High	High	0.84	0.0001206	1.196e-05	2.77	43.37
	TRUE	High	[K].VQEQVHTLLSQDQAQAAR.[L]		4.91192e-09	9.84928e-05	1	1	4	Q07065	Q07065 [506-523]		0	2022.04								8071	Redundant	Light	High	Peak Found	High	0.18	0.0001206	3.143e-09	6.21	27.09
	TRUE	High	[K].VQEQVHTLLSQDQAQAAR.[L]	1xLabel:13C(6)15N(4) [R18]	1.83632e-09	9.84928e-05	1	1	4	Q07065	Q07065 [506-523]		0	2032.04	1.014	0.934675	0	99.3	100.7	53821812	41920051	8071		Heavy	Peak Found	High	High	0.04	0.0001206	1.153e-09	6.88	27.09
	TRUE	High	[K].VQSLQATFGTFESILR.[S]		5.45478e-08	9.84928e-05	1	1	3	Q07065	Q07065 [162-177]		0	1796.95	1.039	0.984948	0	98.1	101.9	5.34319e+06	4.26344e+06	8088		Light	High	Peak Found	High	0.56	0.0001206	3.639e-08	3.89	78.02
	TRUE	High	[K].VQSLQATFGTFESILR.[S]	1xLabel:13C(6)15N(4) [R16]	7.84086e-08	9.84928e-05	1	1	3	Q07065	Q07065 [162-177]		0	1806.96								8088	Redundant	Heavy	Peak Found	High	High	-0.36	0.0001206	5.233e-08	4.7	78.02
TRUE	High	Master Protein	Q14204	Cytoplasmic dynein 1 heavy chain 1 OS=Homo sapiens OX=9606 GN=DYNC1H1 PE=1 SV=5	0	273.118	11	31	74	31	4646	532.1	6.4	275.94	31	Pf03028, Pf08385, Pf08393, Pf12774, Pf12775, Pf12777, Pf12780, Pf12781, Pf17852, Pf18198, Pf18199	1778	ENSG00000197102	DYNC1H1	B0I1R0; hsa:1778; Q14204; Q6DKQ7; Q8WU28; Q92814; Q9Y4G5	Ciliary landscape; Intraflagellar transport proteins binding to dynein	Separation of Sister Chromatids; MHC class II antigen presentation; Resolution of Sister Chromatid Cohesion; HSP90 chaperone cycle for steroid hormone receptors (SHR) in the presence of ligand; Recruitment of NuMA to mitotic centrosomes; RHO GTPases Activate Formins; COPI-mediated anterograde transport; COPI-independent Golgi-to-ER retrograde traffic; HCMV Early Events; Aggrephagy; EML4 and NUDC …	Phagosome; Vasopressin-regulated water reabsorption; Salmonella infection	25	0	1.085	0.755524	28.31	96.9	103.1	6.37706e+07	5.21276e+07	High	High	1	Met-loss+Acetyl [N-Term]
	Checked	Confidence	Annotated Sequence	Modifications	Qvality PEP	Qvality q-value	# Protein Groups	# Proteins	# PSMs	Master Protein Accessions	Positions in Master Proteins	Modifications in Master Proteins	# Missed Cleavages	Theo. MH+ [Da]	Abundance Ratio: (Heavy) / (Light)	Abundance Ratio P-Value: (Heavy) / (Light)	Abundance Ratio Variability [%]: (Heavy) / (Light)	Abundances (Grouped): Light	Abundances (Grouped): Heavy	Abundance: F1: Light, Sample	Abundance: F1: Heavy, Sample	Precursor Quan Result ID	Quan Info	Quan Channel	Found in Sample: [S1] F1: Light, Sample	Found in Sample: [S3] F1: Heavy, Sample	Confidence (by Search Engine): Sequest HT	DeltaM [ppm] (by Search Engine): Sequest HT	Percolator q-Value (by Search Engine): Sequest HT	Percolator PEP (by Search Engine): Sequest HT	XCorr (by Search Engine): Sequest HT	Top Apex RT [min]
	TRUE	High	[R].DAATIMQPYFTSNGLVTK.[A]		5.99924e-05	9.84928e-05	1	1	1	Q14204	Q14204 [2418-2435]		0	1956.97								854	Redundant	Light	High	Peak Found	High	0.51	0.0001206	4.472e-05	4.4	62.82
	TRUE	High	[R].DAATIMQPYFTSNGLVTK.[A]	1xLabel:13C(6)15N(2) [K18]	6.40532e-06	9.84928e-05	1	1	1	Q14204	Q14204 [2418-2435]		0	1964.99	1.287	0.387513	0	87.4	112.6	3.25882e+06	3221278	854		Heavy	Peak Found	High	High	0.74	0.0001206	4.624e-06	4.26	62.82
	TRUE	High	[K].DLFQVAFNR.[V]	1xLabel:13C(6)15N(4) [R9]	0.000179132	9.84928e-05	1	1	1	Q14204	Q14204 [3862-3870]		0	1119.58	100	1e-17			200		2215055	1109		Heavy	Not Found	High	High	0.32	0.0001206	0.0001365	2.84	59.52
	TRUE	High	[K].EALELTDTGLLSGSEER.[V]		9.66672e-08	9.84928e-05	1	1	1	Q14204	Q14204 [1302-1318]		0	1819.89								1477	No Quan Values	Light	High	Not Found	High	0.38	0.0001206	6.499e-08	4.24
	TRUE	High	[R].FGNPLLVQDVESYDPVLNPVLNR.[E]		7.15864e-10	9.84928e-05	1	1	3	Q14204	Q14204 [3629-3651]		0	2598.36								2224	Redundant	Light	High	Peak Found	High	-0.12	0.0001206	4.427e-10	6.01	81.27
	TRUE	High	[R].FGNPLLVQDVESYDPVLNPVLNR.[E]	1xLabel:13C(6)15N(4) [R23]	5.53228e-07	9.84928e-05	1	1	3	Q14204	Q14204 [3629-3651]		0	2608.36	0.783	0.391594	0	112.1	87.9	2.24052e+06	1.34789e+06	2224		Heavy	Peak Found	High	High	1.04	0.0001206	3.821e-07	5.25	81.27
	TRUE	High	[K].FNYGFEYLGVQDK.[L]	1xLabel:13C(6)15N(2) [K13]	1.53178e-05	9.84928e-05	1	1	1	Q14204	Q14204 [1866-1878]		0	1587.76								2295	No Quan Values	Heavy	Not Found	High	High	0.74	0.0001206	1.115e-05	3.21
	TRUE	High	[K].GKEDEGEEAASPMLQIQR.[D]		0.00183747	0.000424254	1	1	1	Q14204	Q14204 [2400-2417]		1	1987.94	0.922	0.731639	0	104.1	95.9	2.26481e+06	1.6039e+06	2603		Light	High	Peak Found	High	0.49	0.0003475	0.001517	2.89	31.77
	TRUE	High	[K].GKEDEGEEAASPMLQIQR.[D]	1xOxidation [M13]	0.00568821	0.000965695	1	1	1	Q14204	Q14204 [2400-2417]		1	2003.93								2605	No Quan Values	Light	High	Not Found	High	1.08	0.0008827	0.004734	2.67
	TRUE	High	[R].KLVPLLLEDGGEAPAALEAALEEK.[S]		0.000434011	0.00021741	1	1	1	Q14204	Q14204 [36-59]		1	2476.35	0.01	1e-17		200		334754		3189		Light	High	Not Found	High	0.36	0.0002	0.0003392	3.32	77.68
	TRUE	High	[R].KLVPLLLEDGGEAPAALEAALEEK.[S]	2xLabel:13C(6)15N(2) [K1; K24]	0.00159112	0.000424254	1	1	1	Q14204	Q14204 [36-59]		1	2492.38								3189	Redundant	Heavy	Peak Found	High	High	-0.11	0.0003475	0.001306	2.5	77.68
	TRUE	High	[K].IAFIMDESNVLDSGFLER.[M]	1xOxidation [M5]; 1xLabel:13C(6)15N(4) [R18]	7.9209e-05	9.84928e-05	1	1	1	Q14204	Q14204 [2990-3007]		0	2082.01								3301	No Quan Values	Heavy	Not Found	High	High	1.28	0.0001206	5.941e-05	3.42
	TRUE	High	[K].LNTQEIFDDWAR.[K]	1xLabel:13C(6)15N(4) [R12]	5.8347e-05	9.84928e-05	1	1	1	Q14204	Q14204 [693-704]		0	1517.73	1.41	0.271315	0	83	117	1.75577e+06	1901246	4241		Heavy	Peak Found	High	High	-0.02	0.0001206	4.36e-05	3.22	63.8
	TRUE	High	[R].IQGLTVEQAEAVVR.[L]		0.000359441	9.84928e-05	1	1	1	Q14204	Q14204 [3924-3937]		0	1512.84	1.233	0.557344	0	89.6	110.4	2.87435e+06	2720925	4350		Light	High	Peak Found	High	0.03	0.0001206	0.0002799	2.85	47.43
	TRUE	High	[R].IQGLTVEQAEAVVR.[L]	1xLabel:13C(6)15N(4) [R14]	0.00147116	0.000424254	1	1	1	Q14204	Q14204 [3924-3937]		0	1522.85								4350	Redundant	Heavy	Peak Found	High	High	-0.27	0.0003475	0.00121	3.06	47.43
	TRUE	High	[K].LSLSNAISTALPLTQLR.[W]		0.00156024	0.000424254	1	1	1	Q14204	Q14204 [4575-4591]		0	1798.04								4480	No Quan Values	Light	High	Not Found	High	0.21	0.0003475	0.001286	2.77
	TRUE	High	[K].LVPLLLEDGGEAPAALEAALEEK.[S]		0.00260572	0.000632611	1	1	2	Q14204	Q14204 [37-59]		0	2348.26								4706	Redundant	Light	High	Peak Found	High	1.63	0.0004281	0.002171	4.39	82.66
	TRUE	High	[K].LVPLLLEDGGEAPAALEAALEEK.[S]	1xLabel:13C(6)15N(2) [K23]	7.95106e-08	9.84928e-05	1	1	2	Q14204	Q14204 [37-59]		0	2356.27	0.973	0.95025	0	101.4	98.6	756863	565718	4706		Heavy	Peak Found	High	High	-0.17	0.0001206	5.322e-08	4.9	82.66
	TRUE	High	[-].MSEPGGGGGEDGSAGLEVSAVQNVADVSVLQK.[H]	1xLabel:13C(6)15N(2) [K32]; 1xMet-loss+Acetyl [N-Term]	0.000442826	0.00021741	1	1	1	Q14204	Q14204 [1-32]	Q14204 1xMet-loss+Acetyl [N-Term]	0	2963.43								5297	No Quan Values	Heavy	Not Found	High	High	0.08	0.0002	0.0003472	3.74
	TRUE	High	[K].MVVLSLPR.[I]		0.00147116	0.000424254	1	1	1	Q14204	Q14204 [991-998]		0	914.549								5422	No Quan Values	Light	High	Not Found	High	0.35	0.0003475	0.001208	1.77
	TRUE	High	[K].NYMSNPSYNYEIVNR.[A]		2.29674e-06	9.84928e-05	1	1	1	Q14204	Q14204 [3370-3384]		0	1863.83	1.002	0.972492	0	99.9	100.1	2016228	1.55187e+06	5821		Light	High	Peak Found	High	-1.28	0.0001206	1.627e-06	4.87	42.06
	TRUE	High	[K].NYMSNPSYNYEIVNR.[A]	1xLabel:13C(6)15N(4) [R15]	3.14042e-05	9.84928e-05	1	1	1	Q14204	Q14204 [3370-3384]		0	1873.84								5821	Redundant	Heavy	Peak Found	High	High	-3.01	0.0001206	2.325e-05	3.91	42.06
	TRUE	High	[K].NYMSNPSYNYEIVNR.[A]	1xOxidation [M3]	2.71298e-05	9.84928e-05	1	1	1	Q14204	Q14204 [3370-3384]		0	1879.83								5820	No Quan Values	Light	High	Not Found	High	-1.39	0.0001206	2.002e-05	3.48
	TRUE	High	[R].QELEQHSVDTASTSDAVTFITYVQSLK.[R]		2.56587e-05	9.84928e-05	1	1	1	Q14204	Q14204 [1151-1177]		0	2997.47								5891	Redundant	Light	High	Peak Found	High	-0.72	0.0001206	1.891e-05	4.06	72.87
	TRUE	High	[R].QELEQHSVDTASTSDAVTFITYVQSLK.[R]	1xDeamidated [Q24]	1.50058e-06	9.84928e-05	1	1	1	Q14204	Q14204 [1151-1177]		0	2998.45	100	1e-17			200		939375	5892		Light	High	Peak Found	High	4.17	0.0001206	1.055e-06	4.74	72.76
	TRUE	High	[R].QELEQHSVDTASTSDAVTFITYVQSLK.[R]	1xLabel:13C(6)15N(2) [K27]	9.4009e-06	9.84928e-05	1	1	1	Q14204	Q14204 [1151-1177]		0	3005.48	0.665	0.183433	0	120.1	79.9	1.14047e+06	582412	5891		Heavy	Peak Found	High	High	0.13	0.0001206	6.805e-06	4.67	72.87
	TRUE	High	[R].RKDSAIQQQVANLQMK.[I]	1xOxidation [M15]	0.00572918	0.000965695	1	1	1	Q14204	Q14204 [1227-1242]		2	1873.99								6185	No Quan Values	Light	High	Not Found	High	1.64	0.0008827	0.004763	2.85
	TRUE	High	[K].TKPVTGNLRPEEALQALTIYEGK.[F]		0.00476534	0.000910608	1	1	1	Q14204	Q14204 [1264-1286]		0	2528.37								7117	No Quan Values	Light	High	Not Found	High	0.44	0.0007817	0.003963	2.75
	TRUE	High	[R].TPVIDADKPVSSQLR.[V]		0.00103333	0.00021741	1	1	2	Q14204	Q14204 [122-136]		0	1625.89	1.091	0.809862	0	95.6	104.4	5935763	4.97543e+06	7310		Light	High	Peak Found	High	0	0.0002	0.0008346	2.78	27.51
	TRUE	High	[R].TTDLLTDWEK.[T]	1xLabel:13C(6)15N(2) [K10]	0.0145571	0.00146171	1	1	1	Q14204	Q14204 [1254-1263]		0	1229.61	1.338	0.282768	0	85.5	114.5	3.34483e+06	3.43786e+06	7393		Heavy	Peak Found	High	High	2.35	0.001368	0.01146	2.07	49.92
	TRUE	High	[K].VEDPTFLNQLQSGVNR.[W]		8.4901e-05	9.84928e-05	1	1	1	Q14204	Q14204 [236-251]		0	1816.92								7624	No Quan Values	Light	High	Not Found	High	0.2	0.0001206	6.374e-05	3.37
	TRUE	High	[K].VEPAVIEAQNAVK.[S]		0.000335922	9.84928e-05	1	1	1	Q14204	Q14204 [3285-3297]		0	1367.75								7662	Redundant	Light	High	Peak Found	High	-0.33	0.0001206	0.0002601	2.54	30.23
	TRUE	High	[K].VEPAVIEAQNAVK.[S]	1xLabel:13C(6)15N(2) [K13]	0.00129943	0.000339819	1	1	1	Q14204	Q14204 [3285-3297]		0	1375.77	1.09	0.839911	0	95.7	104.3	4.57551e+06	3.83128e+06	7662		Heavy	Peak Found	High	High	0.44	0.0002891	0.001063	2.31	30.23
	TRUE	High	[R].VKDDIESLHDKFK.[V]	3xLabel:13C(6)15N(2) [K2; K11; K13]	0.0841782	0.0061531	1	1	1	Q14204	Q14204 [612-624]		2	1597.86	1.522	0.176322	0	79.3	120.7	1963979	2.2953e+06	7789		Heavy	Peak Found	High	High	1.13	0.004782	0.06167	2.24	21.13
	TRUE	High	[R].VLLTTQGVDMISK.[M]		0.00423459	0.00081157	1	1	1	Q14204	Q14204 [4330-4342]		0	1404.78	1.289	0.357444	0	87.4	112.6	5072845	5022323	7904		Light	High	Peak Found	High	0.12	0.0007817	0.003551	2.51	46.58
	TRUE	High	[R].VLLTTQGVDMISK.[M]	1xLabel:13C(6)15N(2) [K13]	0.00068688	0.00021741	1	1	1	Q14204	Q14204 [4330-4342]		0	1412.79								7904	Redundant	Heavy	Peak Found	High	High	-0.25	0.0002	0.0005482	2.26	46.58
	TRUE	High	[R].VLLTTQGVDMISK.[M]	1xOxidation [M10]	0.00875025	0.00104825	1	1	1	Q14204	Q14204 [4330-4342]		0	1420.77								7905	No Quan Values	Light	High	Not Found	High	0.95	0.001011	0.007134	2.47
	TRUE	High	[R].VLRPQVTAVAQQNQGEVPEPQDMK.[V]		1.43905e-06	9.84928e-05	1	1	2	Q14204	Q14204 [483-506]		0	2662.36								7947	Redundant	Light	High	Peak Found	High	-1.09	0.0001206	1.01e-06	5.58	37.69
	TRUE	High	[R].VLRPQVTAVAQQNQGEVPEPQDMK.[V]	1xOxidation [M23]	3.14365e-07	9.84928e-05	1	1	1	Q14204	Q14204 [483-506]		0	2678.36	0.736	0.233431	0	115.2	84.8	3.00184e+06	1696576	7949		Light	High	Peak Found	High	0.14	0.0001206	2.145e-07	4.25	31.57
	TRUE	High	[R].VLRPQVTAVAQQNQGEVPEPQDMK.[V]	1xLabel:13C(6)15N(2) [K24]; 1xLabel:13C(6)15N(4) [R3]	0.00490084	0.000910608	1	1	1	Q14204	Q14204 [483-506]		0	2680.38	0.576	0.0277325	0	126.9	73.1	4267840	1888756	7947		Heavy	Peak Found	High	High	-0.31	0.0008524	0.004077	4.34	37.69
	TRUE	High	[R].VLRPQVTAVAQQNQGEVPEPQDMK.[V]	1xOxidation [M23]; 1xLabel:13C(6)15N(2) [K24]; 1xLabel:13C(6)15N(4) [R3]	2.79229e-06	9.84928e-05	1	1	1	Q14204	Q14204 [483-506]		0	2696.38								7949	Redundant	Heavy	Peak Found	High	High	-0.51	0.0001206	1.975e-06	5.16	31.57
	TRUE	High	[K].VNFLPEIITLSK.[E]		0.00180171	0.000424254	1	1	1	Q14204	Q14204 [737-748]		0	1373.8	2.312	0.00593261	0	60.4	139.6	1.65107e+06	2931933	8018		Light	High	Peak Found	High	0.03	0.0003475	0.001491	2.8	71.91
	TRUE	High	[K].VNFLPEIITLSK.[E]	1xLabel:13C(6)15N(2) [K12]	0.00264053	0.000632611	1	1	1	Q14204	Q14204 [737-748]		0	1381.82								8018	Redundant	Heavy	Peak Found	High	High	-1.93	0.0004992	0.0022	2.12	71.91
	TRUE	High	[K].VTDFGDKVEDPTFLNQLQSGVNR.[W]		7.86611e-05	9.84928e-05	1	1	1	Q14204	Q14204 [229-251]		1	2579.27								8138	Redundant	Light	High	Peak Found	High	0.04	0.0001206	5.896e-05	3.79	58.33
	TRUE	High	[K].VTDFGDKVEDPTFLNQLQSGVNR.[W]	1xLabel:13C(6)15N(2) [K7]; 1xLabel:13C(6)15N(4) [R23]	7.31318e-06	9.84928e-05	1	1	1	Q14204	Q14204 [229-251]		1	2597.3	0.875	0.515867	0	106.7	93.3	4.09545e+06	2751909	8138		Heavy	Peak Found	High	High	-0.35	0.0001206	5.271e-06	4.11	58.33
	TRUE	High	[R].YKEEYAVLISEAQAIK.[A]		0.051346	0.00397277	1	1	1	Q14204	Q14204 [3447-3462]		1	1854.98	1.276	0.372412	0	87.9	112.1	3845445	3.76699e+06	8433		Light	High	Peak Found	High	-1.19	0.003158	0.03758	2.51	57.63
	TRUE	High	[K].YTGEDFDEDLR.[T]		0.00177826	0.000424254	1	1	1	Q14204	Q14204 [2967-2977]		0	1359.57								8541	Redundant	Light	High	Peak Found	High	0.53	0.0003475	0.001466	2.4	35.22
	TRUE	High	[K].YTGEDFDEDLR.[T]	1xLabel:13C(6)15N(4) [R11]	0.000853984	0.00021741	1	1	1	Q14204	Q14204 [2967-2977]		0	1369.58	1.079	0.912844	0	96.2	103.8	2643828	2.19122e+06	8541		Heavy	Peak Found	High	High	0.55	0.0002	0.0006848	2.43	35.22
TRUE	High	Master Protein	P0DMV9	Heat shock 70 kDa protein 1B OS=Homo sapiens OX=9606 GN=HSPA1B PE=1 SV=1	0	272.051	41	20	100	18	641	70	5.66	328.39	20	Pf00012	3303; 3304	ENSG00000204388; ENSG00000212866; ENSG00000224501; ENSG00000231555; ENSG00000232804	HSPA1B	B4E3B6; hsa:3303; hsa:3304; P08107; P0DMV9; P19790; Q5JQI4; Q5SP17; Q9UQL9; Q9UQM0	Apoptosis modulation and signaling; Parkin-ubiquitin proteasomal system pathway; MAPK signaling pathway; Apoptosis modulation by HSP70; VEGFA-VEGFR2 signaling pathway	Neutrophil degranulation; HSP90 chaperone cycle for steroid hormone receptors (SHR) in the presence of ligand; Regulation of HSF1-mediated heat shock response; Attenuation phase	Spliceosome; MAPK signaling pathway; Protein processing in endoplasmic reticulum; Endocytosis; Longevity regulating pathway; Antigen processing and presentation; Estrogen signaling pathway; Prion disease; Legionellosis; Toxoplasmosis; Measles; Lipid and atherosclerosis	22	1	1.432	0.161554	16.89	81.8	118.2	3.15722e+08	3.50347e+08	High	High	1
	Checked	Confidence	Annotated Sequence	Modifications	Qvality PEP	Qvality q-value	# Protein Groups	# Proteins	# PSMs	Master Protein Accessions	Positions in Master Proteins	Modifications in Master Proteins	# Missed Cleavages	Theo. MH+ [Da]	Abundance Ratio: (Heavy) / (Light)	Abundance Ratio P-Value: (Heavy) / (Light)	Abundance Ratio Variability [%]: (Heavy) / (Light)	Abundances (Grouped): Light	Abundances (Grouped): Heavy	Abundance: F1: Light, Sample	Abundance: F1: Heavy, Sample	Precursor Quan Result ID	Quan Info	Quan Channel	Found in Sample: [S1] F1: Light, Sample	Found in Sample: [S3] F1: Heavy, Sample	Confidence (by Search Engine): Sequest HT	DeltaM [ppm] (by Search Engine): Sequest HT	Percolator q-Value (by Search Engine): Sequest HT	Percolator PEP (by Search Engine): Sequest HT	XCorr (by Search Engine): Sequest HT	Top Apex RT [min]
	TRUE	High	[K].AFYPEEISSMVLTK.[ML]		5.63534e-05	9.84928e-05	1	2	2	P0DMV9	P0DMV9 [113-126]		0	1614.81								233	Redundant	Light	High	Peak Found	High	-0.27	0.0001206	4.201e-05	2.55	64.63
	TRUE	High	[K].AFYPEEISSMVLTK.[ML]	1xLabel:13C(6)15N(2) [K14]	2.58382e-05	9.84928e-05	1	2	2	P0DMV9	P0DMV9 [113-126]		0	1622.82	1.393	0.160245	0	83.6	116.4	2.38577e+07	25522576	233		Heavy	Peak Found	High	High	0.39	0.0001206	1.9e-05	2.63	64.63
	TRUE	High	[K].AFYPEEISSMVLTK.[ML]	1xOxidation [M10]	0.000912078	0.00021741	1	2	1	P0DMV9	P0DMV9 [113-126]		0	1630.8								232	Redundant	Light	High	Peak Found	High	0.48	0.0002	0.0007352	2.78	53.84
	TRUE	High	[K].AFYPEEISSMVLTK.[ML]	1xOxidation [M10]; 1xLabel:13C(6)15N(2) [K14]	0.000142689	9.84928e-05	1	2	4	P0DMV9	P0DMV9 [113-126]		0	1638.82	1.523	0.0642571	0	79.3	120.7	1.11032e+07	1.29861e+07	232		Heavy	Peak Found	High	High	0.15	0.0001206	0.0001086	3.47	53.84
	TRUE	High	[K].AQIHDLVLVGGSTR.[I]		0.00013502	9.84928e-05	1	1	3	P0DMV9	P0DMV9 [329-342]		0	1465.81								612	Redundant	Light	High	Peak Found	High	-0.26	0.0001206	0.0001023	2.78	33.63
	TRUE	High	[K].AQIHDLVLVGGSTR.[I]	1xLabel:13C(6)15N(4) [R14]	3.48629e-05	9.84928e-05	1	1	2	P0DMV9	P0DMV9 [329-342]		0	1475.82	1.403	0.181911	0	83.2	116.8	7.86861e+06	8475958	612		Heavy	Peak Found	High	High	0.6	0.0001206	2.578e-05	3.28
	TRUE	High	[K].DAGVIAGLNVLR.[I]		1.45928e-06	9.84928e-05	1	2	3	P0DMV9	P0DMV9 [160-171]		0	1197.69	1.604	0.0389264	0	76.8	123.2	36773220	45300608	872		Light	High	Peak Found	High	-0.12	0.0001206	1.028e-06	3.55	57.16
	TRUE	High	[K].DAGVIAGLNVLR.[I]	1xLabel:13C(6)15N(4) [R12]	5.49393e-06	9.84928e-05	1	2	2	P0DMV9	P0DMV9 [160-171]		0	1207.7								872	Redundant	Heavy	Peak Found	High	High	-0.09	0.0001206	3.945e-06	4.23	57.16
	TRUE	High	[K].EIAEAYLGYPVTNAVITVPAYFNDSQR.[Q]		4.32616e-05	9.84928e-05	1	1	1	P0DMV9	P0DMV9 [129-155]		0	3001.49								1751	Redundant	Light	High	Peak Found	High	0.66	0.0001206	3.204e-05	3.72	79.31
	TRUE	High	[K].EIAEAYLGYPVTNAVITVPAYFNDSQR.[Q]	1xLabel:13C(6)15N(4) [R27]	0.000326936	9.84928e-05	1	1	1	P0DMV9	P0DMV9 [129-155]		0	3011.5	0.846	0.620405	0	108.3	91.7	832739	541177	1751		Heavy	Peak Found	High	High	-0.83	0.0001206	0.000253	2.53	79.31
	TRUE	High	[K].ELEQVCNPIISGLYQGAGGPGPGGFGAQGPK.[G]	1xCarbamidomethyl [C6]; 1xLabel:13C(6)15N(2) [K31]	1.37045e-06	9.84928e-05	1	1	1	P0DMV9	P0DMV9 [598-628]		0	3063.51								1792	No Quan Values	Heavy	Not Found	High	High	-0.09	0.0001206	9.588e-07	4.72
	TRUE	High	[K].ELEQVCNPIISGLYQGAGGPGPGGFGAQGPK.[G]	1xCarbamidomethyl [C6]; 1xDeamidated [Q4]; 1xLabel:13C(6)15N(2) [K31]	0.00075843	0.00021741	1	1	1	P0DMV9	P0DMV9 [598-628]		0	3064.49								1790	Redundant	Heavy	Peak Found	High	High	2.67	0.0002	0.0006047	4.37	68.46
	TRUE	High	[K].ELEQVCNPIISGLYQGAGGPGPGGFGAQGPK.[G]	1xCarbamidomethyl [C6]; 3xDeamidated [Q4; N7; Q15]; 1xLabel:13C(6)15N(2) [K31]	0.000324726	9.84928e-05	1	1	1	P0DMV9	P0DMV9 [598-628]		0	3066.46								1793	No Quan Values	Heavy	Not Found	High	High	-0.25	0.0001206	0.0002528	3.16
	TRUE	High	[K].FGDPVVQSDMK.[H]		0.0186544	0.0016188	1	1	1	P0DMV9	P0DMV9 [78-88]		0	1222.58								2210	Redundant	Light	High	Peak Found	High	0.64	0.001475	0.01442	2.02	28.21
	TRUE	High	[K].FGDPVVQSDMK.[H]	1xLabel:13C(6)15N(2) [K11]	0.00835728	0.00104825	1	1	1	P0DMV9	P0DMV9 [78-88]		0	1230.59	1.511	0.0806998	0	79.6	120.4	8887520	10314421	2210		Heavy	Peak Found	High	High	0.9	0.001011	0.006829	2.45	28.21
	TRUE	High	[K].FGDPVVQSDMKHWPFQVINDGDKPK.[V]		0.00460187	0.00081157	1	1	1	P0DMV9	P0DMV9 [78-102]		1	2884.41	1.659	0.106348	0	75.2	124.8	1.54723e+06	1.97094e+06	2211		Light	High	Peak Found	High	0	0.0007817	0.003839	2.74	58.42
	TRUE	High	[K].FGDPVVQSDMKHWPFQVINDGDKPK.[V]	3xLabel:13C(6)15N(2) [K11; K23; K25]	0.000696024	0.00021741	1	1	1	P0DMV9	P0DMV9 [78-102]		1	2908.45								2211	Redundant	Heavy	Peak Found	High	High	-0.28	0.0002	0.0005546	3.61	58.42
	TRUE	High	[K].HWPFQVINDGDKPK.[V]		1.33273e-06	9.84928e-05	1	1	2	P0DMV9	P0DMV9 [89-102]		0	1680.85	1.519	0.061179	0	79.4	120.6	9726023	11347255	3071		Light	High	Peak Found	High	-0.25	0.0001206	9.313e-07	4.34	40.21
	TRUE	High	[K].HWPFQVINDGDKPK.[V]	2xLabel:13C(6)15N(2) [K12; K14]	1.35146e-06	9.84928e-05	1	1	1	P0DMV9	P0DMV9 [89-102]		0	1696.88								3071	Redundant	Heavy	Peak Found	High	High	-0.72	0.0001206	9.446e-07	4.41	40.43
	TRUE	High	[R].KFGDPVVQSDMKHWPFQVINDGDKPK.[V]		7.38963e-05	9.84928e-05	1	1	1	P0DMV9	P0DMV9 [77-102]		2	3012.5								3115	No Quan Values	Light	High	Not Found	High	-0.78	0.0001206	5.558e-05	4.6
	TRUE	High	[K].LDKAQIHDLVLVGGSTR.[I]	1xLabel:13C(6)15N(2) [K3]; 1xLabel:13C(6)15N(4) [R17]	0.00043111	0.00021741	1	1	2	P0DMV9	P0DMV9 [326-342]		1	1840.04	0.89	0.546896	0	105.8	94.2	5209704	3.56095e+06	3436		Heavy	Peak Found	High	High	1.62	0.0002	0.0003384	3.1	41.09
	TRUE	High	[R].IINEPTAAAIAYGLDR.[RT]		7.41515e-08	9.84928e-05	2	2	3	P17066; P0DMV9	P17066 [174-189]; P0DMV9 [172-187]		0	1687.9	1.278	0.317127	0	87.8	112.2	58462170	57374173	4044	Shared	Light	High	Peak Found	High	-0.26	0.0001206	4.967e-08	5.35	56.17
	TRUE	High	[R].IINEPTAAAIAYGLDR.[RT]	1xLabel:13C(6)15N(4) [R16]	3.12131e-08	9.84928e-05	2	2	4	P17066; P0DMV9	P17066 [174-189]; P0DMV9 [172-187]		0	1697.91								4044	Redundant	Heavy	Peak Found	High	High	-0.23	0.0001206	2.055e-08	4.91	56.17
	TRUE	High	[K].LLQDFFNGR.[D]		0.00146158	0.000424254	1	1	2	P0DMV9	P0DMV9 [349-357]		0	1109.57	1.659	0.02619	0	75.2	124.8	18249284	23254674	4071		Light	High	Peak Found	High	0.09	0.0003475	0.001194	2.42	51.54
	TRUE	High	[K].LLQDFFNGR.[D]	1xLabel:13C(6)15N(4) [R9]	0.000221632	9.84928e-05	1	1	1	P0DMV9	P0DMV9 [349-357]		0	1119.58								4071	Redundant	Heavy	Peak Found	High	High	0.13	0.0001206	0.0001705	2.45	51.54
	TRUE	High	[R].LVNHFVEEFK.[R]		0.00366765	0.00071665	1	1	1	P0DMV9	P0DMV9 [237-246]		0	1261.66	1.585	0.0427995	0	77.4	122.6	10754556	1.30921e+07	4700		Light	High	Peak Found	High	1.35	0.0007168	0.003071	2.08	36.57
	TRUE	High	[R].LVNHFVEEFK.[R]	1xLabel:13C(6)15N(2) [K10]	0.00059374	0.00021741	1	1	3	P0DMV9	P0DMV9 [237-246]		0	1269.67								4700	Redundant	Heavy	Peak Found	High	High	0.38	0.0002	0.000471	2.64	36.57
	TRUE	High	[K].NALESYAFNMK.[S]		7.75765e-05	9.84928e-05	1	2	1	P0DMV9	P0DMV9 [540-550]		0	1287.6	1.583	0.0450455	0	77.4	122.6	25225562	30674722	5442		Light	High	Peak Found	High	-0.47	0.0001206	5.817e-05	3.23	46.18
	TRUE	High	[K].NALESYAFNMK.[S]	1xLabel:13C(6)15N(2) [K11]	1.47929e-05	9.84928e-05	1	2	2	P0DMV9	P0DMV9 [540-550]		0	1295.62								5442	Redundant	Heavy	Peak Found	High	High	-0.12	0.0001206	1.078e-05	3.76	46.18
	TRUE	High	[K].NALESYAFNMK.[S]	1xOxidation [M10]	4.86947e-05	9.84928e-05	1	2	2	P0DMV9	P0DMV9 [540-550]		0	1303.6	1.61	0.0374189	0	76.6	123.4	18782198	23217808	5443		Light	High	Peak Found	High	0.26	0.0001206	3.634e-05	3.62	35.38
	TRUE	High	[K].NALESYAFNMK.[S]	1xOxidation [M10]; 1xLabel:13C(6)15N(2) [K11]	0.000107465	9.84928e-05	1	2	2	P0DMV9	P0DMV9 [540-550]		0	1311.61								5443	Redundant	Heavy	Peak Found	High	High	0.32	0.0001206	8.096e-05	3.39	35.38
	TRUE	High	[K].NQVALNPQNTVFDAK.[R]		8.12046e-07	9.84928e-05	1	1	3	P0DMV9	P0DMV9 [57-71]		0	1658.85	1.37	0.184501	0	84.4	115.6	38712668	40736892	5708		Light	High	Peak Found	High	0.32	0.0001206	5.651e-07	5.55	39.68
	TRUE	High	[K].NQVALNPQNTVFDAK.[R]	1xLabel:13C(6)15N(2) [K15]	3.53988e-06	9.84928e-05	1	1	2	P0DMV9	P0DMV9 [57-71]		0	1666.86								5708	Redundant	Heavy	Peak Found	High	High	0.45	0.0001206	2.521e-06	4.54	39.68
	TRUE	High	[K].NQVALNPQNTVFDAKR.[L]		0.000537418	0.00021741	1	1	3	P0DMV9	P0DMV9 [57-72]		1	1814.95	1.462	0.102962	0	81.2	118.8	3.07537e+07	34529644	5710		Light	High	Peak Found	High	-0.19	0.0002	0.0004243	2.05	32.64
	TRUE	High	[K].NQVALNPQNTVFDAKR.[L]	1xLabel:13C(6)15N(2) [K15]; 1xLabel:13C(6)15N(4) [R16]	0.00184955	0.000424254	1	1	4	P0DMV9	P0DMV9 [57-72]		1	1832.97								5710	Redundant	Heavy	Peak Found	High	High	0.12	0.0003475	0.001533	3.08	32.64
	TRUE	High	[K].QTQIFTTYSDNQPGVLIQVYEGER.[A]		0.0001184	9.84928e-05	1	2	1	P0DMV9	P0DMV9 [424-447]		0	2786.36								6104	Redundant	Light	High	Peak Found	High	-1.58	0.0001206	8.993e-05	3.71	68.12
	TRUE	High	[K].QTQIFTTYSDNQPGVLIQVYEGER.[A]	1xLabel:13C(6)15N(4) [R24]	2.21799e-06	9.84928e-05	1	2	1	P0DMV9	P0DMV9 [424-447]		0	2796.37	0.594	0.120863	0	125.5	74.5	781835	356748	6104		Heavy	Peak Found	High	High	0.11	0.0001206	1.564e-06	4.56	68.12
	TRUE	High	[K].SINPDEAVAYGAAVQAAILMGDK.[S]		3.64007e-06	9.84928e-05	1	2	1	P0DMV9	P0DMV9 [362-384]		0	2304.15								6553	Redundant	Light	High	Peak Found	High	0.76	0.0001206	2.592e-06	4.05	81.44
	TRUE	High	[K].SINPDEAVAYGAAVQAAILMGDK.[S]	1xLabel:13C(6)15N(2) [K23]	1.32346e-06	9.84928e-05	1	2	1	P0DMV9	P0DMV9 [362-384]		0	2312.17	1.195	0.608993	0	91.1	108.9	246938	226601	6553		Heavy	Peak Found	High	High	-0.52	0.0001206	9.273e-07	4.23	81.44
	TRUE	High	[K].SINPDEAVAYGAAVQAAILMGDK.[S]	1xOxidation [M20]	2.02541e-07	9.84928e-05	1	2	3	P0DMV9	P0DMV9 [362-384]		0	2320.15								6554	Redundant	Light	High	Peak Found	High	0.15	0.0001206	1.374e-07	5.26	76.45
	TRUE	High	[K].SINPDEAVAYGAAVQAAILMGDK.[S]	1xOxidation [M20]; 1xLabel:13C(6)15N(2) [K23]	0.000405822	9.84928e-05	1	2	4	P0DMV9	P0DMV9 [362-384]		0	2328.16	1.095	0.819816	0	95.5	104.5	1642707	1.38148e+06	6554		Heavy	Peak Found	High	High	-1.98	0.0001206	0.0003169	4.03	76.45
	TRUE	High	[R].TTPSYVAFTDTER.[L]		1.25131e-05	9.84928e-05	3	6	3	P17066; P11142; P0DMV9	P17066 [39-51]; P11142 [37-49]; P0DMV9 [37-49]		0	1487.7	1.249	0.371953	0	88.9	111.1	110500584	105981720	7404	Shared	Light	High	Peak Found	High	0.28	0.0001206	9.132e-06	3.27	36.55
	TRUE	High	[R].TTPSYVAFTDTER.[L]	1xLabel:13C(6)15N(4) [R13]	0.000182868	9.84928e-05	3	6	4	P17066; P11142; P0DMV9	P17066 [39-51]; P11142 [37-49]; P0DMV9 [37-49]		0	1497.71								7404	Redundant	Heavy	Peak Found	High	High	0.23	0.0001206	0.0001396	3.37	36.55
TRUE	High	Master Protein	P60709	Actin, cytoplasmic 1 OS=Homo sapiens OX=9606 GN=ACTB PE=1 SV=1	0	271.474	53	16	122	1	375	41.7	5.48	420.89	16	Pf00022	60	ENSG00000075624	ACTB	hsa:60; P02570; P60709; P70514; P99021; Q11211; Q64316; Q75MN2; Q96B34; Q96HG5	Arrhythmogenic right ventricular cardiomyopathy; Pathogenic Escherichia coli infection; Common pathways underlying drug addiction; Myometrial relaxation and contraction pathways; Focal adhesion; Fas ligand pathway and stress induction of heat shock proteins; Ebola virus pathway in host; Acute viral myocarditis; Thermogenesis; Mechanoregulation and pathology of YAP/TAZ via Hippo and non-Hippo mech…	Signaling by BRAF and RAF1 fusions; UCH proteinases; Translocation of SLC2A4 (GLUT4) to the plasma membrane; RHO GTPases Activate Formins; Factors involved in megakaryocyte development and platelet production; Clathrin-mediated endocytosis; Recycling pathway of L1; EPH-ephrin mediated repulsion of cells; B-WICH complex positively regulates rRNA expression; Signaling by moderate kinase activity BR…	Rap1 signaling pathway; Phagosome; Apoptosis; Hippo signaling pathway; Focal adhesion; Adherens junction; Tight junction; Platelet activation; Neutrophil extracellular trap formation; Leukocyte transendothelial migration; Thermogenesis; Regulation of actin cytoskeleton; Thyroid hormone signaling pathway; Oxytocin signaling pathway; Gastric acid secretion; Amyotrophic lateral sclerosis; Bacterial …	77	16	1.079	0.772478	13.49	103.2	96.8	1.29004e+09	9.30011e+08	High	High	1	Met-loss+Acetyl [N-Term]
	Checked	Confidence	Annotated Sequence	Modifications	Qvality PEP	Qvality q-value	# Protein Groups	# Proteins	# PSMs	Master Protein Accessions	Positions in Master Proteins	Modifications in Master Proteins	# Missed Cleavages	Theo. MH+ [Da]	Abundance Ratio: (Heavy) / (Light)	Abundance Ratio P-Value: (Heavy) / (Light)	Abundance Ratio Variability [%]: (Heavy) / (Light)	Abundances (Grouped): Light	Abundances (Grouped): Heavy	Abundance: F1: Light, Sample	Abundance: F1: Heavy, Sample	Precursor Quan Result ID	Quan Info	Quan Channel	Found in Sample: [S1] F1: Light, Sample	Found in Sample: [S3] F1: Heavy, Sample	Confidence (by Search Engine): Sequest HT	DeltaM [ppm] (by Search Engine): Sequest HT	Percolator q-Value (by Search Engine): Sequest HT	Percolator PEP (by Search Engine): Sequest HT	XCorr (by Search Engine): Sequest HT	Top Apex RT [min]
	TRUE	High	[R].AVFPSIVGRPR.[QH]	2xLabel:13C(6)15N(4) [R9; R11]	0.00282204	0.000632611	3	9	3	P60709; P68133; P63261	P60709 [29-39]; P68133 [31-41]; P63261 [29-39]		0	1218.72	1.023	0.967907	0	98.9	101.1	177056900	139138240	787	Shared	Heavy	Peak Found	High	High	0.19	0.0004992	0.002362	1.96	33.12
	TRUE	High	[R].DLTDYLMK.[I]		0.00352142	0.00071665	4	7	1	P60709; P68133; Q562R1; P63261	P60709 [184-191]; P68133 [186-193]; Q562R1 [185-192]; P63261 [184-191]		0	998.486	1.15	0.613245	0	93	107	29725652	26246546	1178	Shared	Light	High	Peak Found	High	-0.05	0.0006511	0.002954	2.15	53.27
	TRUE	High	[R].DLTDYLMK.[I]	1xLabel:13C(6)15N(2) [K8]	0.00634032	0.000965695	4	7	1	P60709; P68133; Q562R1; P63261	P60709 [184-191]; P68133 [186-193]; Q562R1 [185-192]; P63261 [184-191]		0	1006.5								1178	Redundant	Heavy	Peak Found	High	High	-0.08	0.0008827	0.005232	2.35	53.27
	TRUE	High	[R].DLTDYLMK.[I]	1xOxidation [M7]	0.0439801	0.00366907	4	7	1	P60709; P68133; Q562R1; P63261	P60709 [184-191]; P68133 [186-193]; Q562R1 [185-192]; P63261 [184-191]		0	1014.48	1.181	0.529209	0	91.7	108.3	27005514	24483384	1179	Shared	Light	High	Peak Found	High	-0.28	0.002942	0.0323	1.97	42.81
	TRUE	High	[R].DLTDYLMK.[I]	1xOxidation [M7]; 1xLabel:13C(6)15N(2) [K8]	0.00855117	0.00104825	4	7	1	P60709; P68133; Q562R1; P63261	P60709 [184-191]; P68133 [186-193]; Q562R1 [185-192]; P63261 [184-191]		0	1022.5								1179	Redundant	Heavy	Peak Found	High	High	-0.37	0.001011	0.006979	2.12	42.81
	TRUE	High	[K].DLYANTVLSGGTTMYPGIADR.[M]		4.67849e-08	9.84928e-05	2	2	5	P60709; P63261	P60709 [292-312]; P63261 [292-312]		0	2215.07								1189	Redundant	Light	High	Peak Found	High	-0.7	0.0001206	3.106e-08	5.15	64.35
	TRUE	High	[K].DLYANTVLSGGTTMYPGIADR.[M]	1xLabel:13C(6)15N(4) [R21]	4.87776e-09	9.84928e-05	2	2	3	P60709; P63261	P60709 [292-312]; P63261 [292-312]		0	2225.08	1.124	0.688563	0	94.1	105.9	36205923	3.12619e+07	1189	Shared	Heavy	Peak Found	High	High	0.31	0.0001206	3.11e-09	5.29	64.35
	TRUE	High	[K].DLYANTVLSGGTTMYPGIADR.[M]	1xOxidation [M14]	1.08825e-08	9.84928e-05	2	2	4	P60709; P63261	P60709 [292-312]; P63261 [292-312]		0	2231.06	1.079	0.836401	0	96.2	103.8	49563563	41056170	1188	Shared	Light	High	Peak Found	High	0.79	0.0001206	7.027e-09	6.11	58.18
	TRUE	High	[K].DLYANTVLSGGTTMYPGIADR.[M]	1xOxidation [M14]; 1xLabel:13C(6)15N(4) [R21]	4.51736e-09	9.84928e-05	2	2	3	P60709; P63261	P60709 [292-312]; P63261 [292-312]		0	2241.07								1188	Redundant	Heavy	Peak Found	High	High	0.14	0.0001206	2.884e-09	6.25	58.18
	TRUE	High	[K].DLYANTVLSGGTTMYPGIADR.[M]	1xDeamidated [N5]; 1xOxidation [M14]; 1xLabel:13C(6)15N(4) [R21]	8.00792e-07	9.84928e-05	2	2	1	P60709; P63261	P60709 [292-312]; P63261 [292-312]		0	2242.06								1187	No Quan Values	Heavy	Not Found	High	High	4.45	0.0001206	5.581e-07	4.67
	TRUE	High	[K].DSYVGDEAQSKR.[G]		0.00533426	0.000965695	3	6	1	P60709; P68133; P63261	P60709 [51-62]; P68133 [53-64]; P63261 [51-62]		1	1354.62	1.357	0.363339	0	84.9	115.1	57569.7	59983.8	1330	Shared	Light	High	Peak Found	High	-0.66	0.0008827	0.004435	2.35	12.56
	TRUE	High	[K].EITALAPSTMK.[I]		0.000254136	9.84928e-05	3	6	4	P60709; P68133; P63261	P60709 [316-326]; P68133 [318-328]; P63261 [316-326]		0	1161.62								1854	Redundant	Light	High	Peak Found	High	0.35	0.0001206	0.0001954	2.81	29.88
	TRUE	High	[K].EITALAPSTMK.[I]	1xLabel:13C(6)15N(2) [K11]	0.000361879	9.84928e-05	3	6	3	P60709; P68133; P63261	P60709 [316-326]; P68133 [318-328]; P63261 [316-326]		0	1169.63	1.031	0.99677	0	98.5	101.5	151104608	119665008	1854	Shared	Heavy	Peak Found	High	High	0.42	0.0001206	0.0002826	3.09	29.88
	TRUE	High	[K].EITALAPSTMK.[I]	1xOxidation [M10]	0.000182868	9.84928e-05	3	6	9	P60709; P68133; P63261	P60709 [316-326]; P68133 [318-328]; P63261 [316-326]		0	1177.61	0.913	0.567338	0	104.5	95.5	3.11803e+07	2.18726e+07	1855	Shared	Light	High	Peak Found	High	0.22	0.0001206	0.0001395	2.84	24.99
	TRUE	High	[K].EITALAPSTMK.[I]	1xOxidation [M10]; 1xLabel:13C(6)15N(2) [K11]	0.0180436	0.00153507	3	6	4	P60709; P68133; P63261	P60709 [316-326]; P68133 [318-328]; P63261 [316-326]		0	1185.63								1855	Redundant	Heavy	Peak Found	High	High	3.27	0.001416	0.01397	1.98	24.99
	TRUE	High	[R].HQGVMVGMGQK.[D]	1xOxidation [M8]	0.0173095	0.00153507	4	7	1	P60709; P68133; Q562R1; P63261	P60709 [40-50]; P68133 [42-52]; Q562R1 [41-51]; P63261 [40-50]		0	1187.57								3041	No Quan Values	Light	High	Not Found	High	0.06	0.001416	0.01343	2.25
	TRUE	High	[R].HQGVMVGMGQKDSYVGDEAQSKR.[G]	1xOxidation [M8]	0.000853984	0.00021741	3	6	1	P60709; P68133; P63261	P60709 [40-62]; P68133 [42-64]; P63261 [40-62]		2	2523.17	1.427	0.262003	0	82.4	117.6	442769	485315	3042	Shared	Light	High	Peak Found	High	0.61	0.0002	0.0006849	3.91	15.39
	TRUE	High	[R].KDLYANTVLSGGTTMYPGIADR.[M]		4.09847e-06	9.84928e-05	2	2	2	P60709; P63261	P60709 [291-312]; P63261 [291-312]		1	2343.16	0.989	0.883016	0	100.6	99.4	6.68617e+06	5.07655e+06	3092	Shared	Light	High	Peak Found	High	-0.05	0.0001206	2.925e-06	5.52	53.27
	TRUE	High	[R].KDLYANTVLSGGTTMYPGIADR.[M]	1xOxidation [M15]	0.00068688	0.00021741	2	2	1	P60709; P63261	P60709 [291-312]; P63261 [291-312]		1	2359.16								3094	No Quan Values	Light	High	Not Found	High	-0.3	0.0002	0.0005476	4.05
	TRUE	High	[R].KDLYANTVLSGGTTMYPGIADR.[M]	1xLabel:13C(6)15N(2) [K1]; 1xLabel:13C(6)15N(4) [R22]	0.00019859	9.84928e-05	2	2	1	P60709; P63261	P60709 [291-312]; P63261 [291-312]		1	2361.19								3092	Redundant	Heavy	Peak Found	High	High	-0.33	0.0001206	0.0001516	4.53	53.27
	TRUE	High	[K].LCYVALDFEQEMATAASSSSLEK.[S]	1xCarbamidomethyl [C2]; 1xLabel:13C(6)15N(2) [K23]	0.00486656	0.000910608	2	3	1	P60709; P63261	P60709 [216-238]; P63261 [216-238]		0	2558.19								3413	No Quan Values	Heavy	Not Found	High	High	-0.33	0.0008524	0.004048	2.93
	TRUE	High	[R].LDLAGRDLTDYLMK.[I]	1xOxidation [M13]	0.0224175	0.00204583	4	7	1	P60709; P68133; Q562R1; P63261	P60709 [178-191]; P68133 [180-193]; Q562R1 [179-192]; P63261 [178-191]		1	1639.84	1.302	0.312426	0	86.9	113.1	6632160	6.63096e+06	3440	Shared	Light	High	Peak Found	High	-0.01	0.001781	0.0171	2.81	53.92
	TRUE	High	[K].IWHHTFYNELR.[V]		2.97326e-06	9.84928e-05	3	9	8	P60709; P68133; P63261	P60709 [85-95]; P68133 [87-97]; P63261 [85-95]		0	1515.75								4759	Redundant	Light	High	Peak Found	High	-0.3	0.0001206	2.107e-06	4.33	37.18
	TRUE	High	[K].IWHHTFYNELR.[V]	1xLabel:13C(6)15N(4) [R11]	4.48759e-06	9.84928e-05	3	9	10	P60709; P68133; P63261	P60709 [85-95]; P68133 [87-97]; P63261 [85-95]		0	1525.76	1.177	0.53908	0	91.9	108.1	8.21812e+07	7.42676e+07	4759	Shared	Heavy	Peak Found	High	High	0.01	0.0001206	3.208e-06	4.09	37.18
	TRUE	High	[-].MDDDIAALVVDNGSGMCK.[A]	1xCarbamidomethyl [C17]; 1xMet-loss+Acetyl [N-Term]	1.73661e-05	9.84928e-05	1	1	1	P60709	P60709 [1-18]	P60709 1xMet-loss+Acetyl [N-Term]	0	1821.8	1.189	0.603947	0	91.4	108.6	1.82614e+06	1667316	5014		Light	High	Peak Found	High	-1.28	0.0001206	1.267e-05	4.42	69.12
	TRUE	High	[-].MDDDIAALVVDNGSGMCK.[A]	1xCarbamidomethyl [C17]; 1xLabel:13C(6)15N(2) [K18]; 1xMet-loss+Acetyl [N-Term]	1.32311e-05	9.84928e-05	1	1	1	P60709	P60709 [1-18]	P60709 1xMet-loss+Acetyl [N-Term]	0	1829.81								5014	Redundant	Heavy	Peak Found	High	High	-0.36	0.0001206	9.604e-06	4.77	69.12
	TRUE	High	[R].MQKEITALAPSTMK.[I]		0.000116773	9.84928e-05	3	6	1	P60709; P68133; P63261	P60709 [313-326]; P68133 [315-328]; P63261 [313-326]		1	1548.81								5259	No Quan Values	Light	High	Not Found	High	0.49	0.0001206	8.853e-05	3.69
	TRUE	High	[KR].SYELPDGQVITIGNER.[F]		1.82413e-07	9.84928e-05	4	10	5	P60709; P68133; Q562R1; P63261	P60709 [239-254]; P68133 [241-256]; Q562R1 [240-255]; P63261 [239-254]		0	1790.89	0.984	0.821614	0	100.8	99.2	2.36206e+08	178421094	6893	Shared	Light	High	Peak Found	High	0.09	0.0001206	1.239e-07	4.64	56.11
	TRUE	High	[KR].SYELPDGQVITIGNER.[F]	1xLabel:13C(6)15N(4) [R16]	1.68909e-08	9.84928e-05	4	10	6	P60709; P68133; Q562R1; P63261	P60709 [239-254]; P68133 [241-256]; Q562R1 [240-255]; P63261 [239-254]		0	1800.9								6893	Redundant	Heavy	Peak Found	High	High	0.04	0.0001206	1.099e-08	4.34	56.11
	TRUE	High	[R].TTGIVMDSGDGVTHTVPIYEGYALPHAILR.[L]		9.66812e-07	9.84928e-05	2	2	4	P60709; P63261	P60709 [148-177]; P63261 [148-177]		0	3183.61	0.887	0.479576	0	106	94	28735882	19584965	7398	Shared	Light	High	Peak Found	High	-0.12	0.0001206	6.764e-07	3.18	64.26
	TRUE	High	[R].TTGIVMDSGDGVTHTVPIYEGYALPHAILR.[L]	1xLabel:13C(6)15N(4) [R30]	5.01757e-06	9.84928e-05	2	2	3	P60709; P63261	P60709 [148-177]; P63261 [148-177]		0	3193.62								7398	Redundant	Heavy	Peak Found	High	High	0.28	0.0001206	3.589e-06	3.26	64.26
	TRUE	High	[R].TTGIVMDSGDGVTHTVPIYEGYALPHAILR.[L]	1xOxidation [M6]	9.94034e-08	9.84928e-05	2	2	4	P60709; P63261	P60709 [148-177]; P63261 [148-177]		0	3199.61	0.983	0.821178	0	100.8	99.2	24957441	18849624	7397	Shared	Light	High	Peak Found	High	0.42	0.0001206	6.677e-08	4.34	60.81
	TRUE	High	[R].TTGIVMDSGDGVTHTVPIYEGYALPHAILR.[L]	1xOxidation [M6]; 1xLabel:13C(6)15N(4) [R30]	6.58668e-07	9.84928e-05	2	2	2	P60709; P63261	P60709 [148-177]; P63261 [148-177]		0	3209.62								7397	Redundant	Heavy	Peak Found	High	High	3.15	0.0001206	4.566e-07	5.55	60.81
	TRUE	High	[R].VAPEEHPVLLTEAPLNPK.[A]		2.64041e-07	9.84928e-05	2	2	5	P60709; P63261	P60709 [96-113]; P63261 [96-113]		0	1954.06								7560	Redundant	Light	High	Peak Found	High	0.05	0.0001206	1.805e-07	4.33	41.94
	TRUE	High	[R].VAPEEHPVLLTEAPLNPK.[A]	1xLabel:13C(6)15N(2) [K18]	3.23293e-06	9.84928e-05	2	2	5	P60709; P63261	P60709 [96-113]; P63261 [96-113]		0	1962.08	0.719	0.0909556	0	116.3	83.7	400474072	221243978	7560	Shared	Heavy	Peak Found	High	High	-0.8	0.0001206	2.3e-06	3.99	41.94
TRUE	High	Master Protein	P68363	Tubulin alpha-1B chain OS=Homo sapiens OX=9606 GN=TUBA1B PE=1 SV=1	0	254.026	45	16	108	3	451	50.1	5.06	352.94	16	Pf00091, Pf03953	10376	ENSG00000123416	TUBA1B	hsa:10376; P04687; P05209; P68363; Q27I68; Q8WU19	Alzheimer's disease and miRNA effects; Pathogenic Escherichia coli infection; Allograft Rejection; Parkin-ubiquitin proteasomal system pathway; Alzheimer's disease	Separation of Sister Chromatids; The role of GTSE1 in G2/M progression after G2 checkpoint; Translocation of SLC2A4 (GLUT4) to the plasma membrane; Resolution of Sister Chromatid Cohesion; RHO GTPases Activate Formins; EML4 and NUDC in mitotic spindle formation; Hedgehog 'off' state; COPI-dependent Golgi-to-ER retrograde traffic; Recycling pathway of L1; MHC class II antigen presentation; Aggreph…	Phagosome; Apoptosis; Tight junction; Gap junction; Alzheimer disease; Parkinson disease; Amyotrophic lateral sclerosis; Huntington disease; Prion disease; Pathways of neurodegeneration; Pathogenic Escherichia coli infection; Salmonella infection	47	14	1.171	0.541635	13.6	94.6	105.4	7.65686e+08	6.54699e+08	High	High	1
	Checked	Confidence	Annotated Sequence	Modifications	Qvality PEP	Qvality q-value	# Protein Groups	# Proteins	# PSMs	Master Protein Accessions	Positions in Master Proteins	Modifications in Master Proteins	# Missed Cleavages	Theo. MH+ [Da]	Abundance Ratio: (Heavy) / (Light)	Abundance Ratio P-Value: (Heavy) / (Light)	Abundance Ratio Variability [%]: (Heavy) / (Light)	Abundances (Grouped): Light	Abundances (Grouped): Heavy	Abundance: F1: Light, Sample	Abundance: F1: Heavy, Sample	Precursor Quan Result ID	Quan Info	Quan Channel	Found in Sample: [S1] F1: Light, Sample	Found in Sample: [S3] F1: Heavy, Sample	Confidence (by Search Engine): Sequest HT	DeltaM [ppm] (by Search Engine): Sequest HT	Percolator q-Value (by Search Engine): Sequest HT	Percolator PEP (by Search Engine): Sequest HT	XCorr (by Search Engine): Sequest HT	Top Apex RT [min]
	TRUE	High	[R].AVCMLSNTTAIAEAWAR.[L]	1xCarbamidomethyl [C3]	9.33662e-07	9.84928e-05	1	6	1	P68363	P68363 [374-390]		0	1864.9								775	Redundant	Light	High	Peak Found	High	0.74	0.0001206	6.519e-07	4.1	65.31
	TRUE	High	[R].AVCMLSNTTAIAEAWAR.[L]	1xCarbamidomethyl [C3]; 1xLabel:13C(6)15N(4) [R17]	3.63978e-07	9.84928e-05	1	6	2	P68363	P68363 [374-390]		0	1874.91	1.23	0.539361	0	89.7	110.3	1.56302e+06	1476234	775		Heavy	Peak Found	High	High	1.21	0.0001206	2.495e-07	4.3	65.31
	TRUE	High	[R].AVCMLSNTTAIAEAWAR.[L]	1xCarbamidomethyl [C3]; 1xOxidation [M4]; 1xLabel:13C(6)15N(4) [R17]	0.00018668	9.84928e-05	1	6	1	P68363	P68363 [374-390]		0	1890.91								772	No Quan Values	Heavy	Not Found	High	High	-0.12	0.0001206	0.0001433	3.38
	TRUE	High	[R].AVFVDLEPTVIDEVR.[T]		1.38952e-07	9.84928e-05	2	3	7	P68363; Q9BQE3	P68363 [65-79]; Q9BQE3 [65-79]		0	1701.91								790	Redundant	Light	High	Peak Found	High	-0.51	0.0001206	9.355e-08	4.54	66.5
	TRUE	High	[R].AVFVDLEPTVIDEVR.[T]	1xLabel:13C(6)15N(4) [R15]	8.76702e-08	9.84928e-05	2	3	6	P68363; Q9BQE3	P68363 [65-79]; Q9BQE3 [65-79]		0	1711.91	1.1	0.765841	0	95.2	104.8	1.36522e+08	1.15316e+08	790	Shared	Heavy	Peak Found	High	High	-0.35	0.0001206	5.88e-08	4.64	66.5
	TRUE	High	[K].DVNAAIATIK.[T]		5.79428e-05	9.84928e-05	2	5	2	P68363; Q9BQE3	P68363 [327-336]; Q9BQE3 [327-336]		0	1015.58	1.277	0.318147	0	87.8	112.2	111327288	109206296	1381	Shared	Light	High	Peak Found	High	0.24	0.0001206	4.337e-05	3.05	32.57
	TRUE	High	[K].DVNAAIATIK.[T]	1xLabel:13C(6)15N(2) [K10]	5.9164e-05	9.84928e-05	2	5	4	P68363; Q9BQE3	P68363 [327-336]; Q9BQE3 [327-336]		0	1023.59								1381	Redundant	Heavy	Peak Found	High	High	0.19	0.0001206	4.421e-05	2.65	32.57
	TRUE	High	[K].DYEEVGVDSVEGEGEEEGEEY.[-]		9.20588e-08	9.84928e-05	1	2	2	P68363	P68363 [431-451]		0	2348.9									Indistinguishable Channels		Not Found	Not Found	High	-0.9	0.0001206	6.194e-08	4.49	54.87
	TRUE	High	[K].EIIDLVLDR.[I]		0.000993428	0.00021741	2	3	1	P68363; Q9BQE3	P68363 [113-121]; Q9BQE3 [113-121]		0	1085.62	1.091	0.793206	0	95.6	104.4	7597223	6.36832e+06	1815	Shared	Light	High	Peak Found	High	-0.52	0.0002	0.0008049	2.09	59.66
	TRUE	High	[R].LDHKFDLMYAK.[R]		2.05291e-05	9.84928e-05	2	7	2	P68363; Q9BQE3	P68363 [391-401]; Q9BQE3 [391-401]		1	1380.7	1.555	0.0549889	0	78.3	121.7	2.42026e+07	2.88998e+07	3431	Shared	Light	High	Peak Found	High	0.08	0.0001206	1.507e-05	3.69	31.48
	TRUE	High	[R].LDHKFDLMYAK.[R]	1xOxidation [M8]	0.00037939	9.84928e-05	2	7	3	P68363; Q9BQE3	P68363 [391-401]; Q9BQE3 [391-401]		1	1396.69								3432	Redundant	Light	High	Peak Found	High	-0.06	0.0001206	0.0002967	2.4	24
	TRUE	High	[R].LDHKFDLMYAK.[R]	2xLabel:13C(6)15N(2) [K4; K11]	0.000163794	9.84928e-05	2	7	3	P68363; Q9BQE3	P68363 [391-401]; Q9BQE3 [391-401]		1	1396.73								3431	Redundant	Heavy	Peak Found	High	High	-0.44	0.0001206	0.0001252	3.83	31.48
	TRUE	High	[R].LDHKFDLMYAK.[R]	1xOxidation [M8]; 2xLabel:13C(6)15N(2) [K4; K11]	1.94155e-05	9.84928e-05	2	7	2	P68363; Q9BQE3	P68363 [391-401]; Q9BQE3 [391-401]		1	1412.72	1.169	0.559897	0	92.2	107.8	28375650	25472902	3432	Shared	Heavy	Peak Found	High	High	-0.56	0.0001206	1.423e-05	2.68	24
	TRUE	High	[R].LDHKFDLMYAKR.[A]		8.66865e-05	9.84928e-05	2	7	3	P68363; Q9BQE3	P68363 [391-402]; Q9BQE3 [391-402]		2	1536.8								3434	Redundant	Light	High	Peak Found	High	-0.59	0.0001206	6.542e-05	3.29	26.18
	TRUE	High	[R].LDHKFDLMYAKR.[A]	1xOxidation [M8]	0.0107177	0.00112166	2	7	1	P68363; Q9BQE3	P68363 [391-402]; Q9BQE3 [391-402]		2	1552.79								3433	Redundant	Light	High	Peak Found	High	-0.47	0.00106	0.008581	3	19.99
	TRUE	High	[R].LDHKFDLMYAKR.[A]	2xLabel:13C(6)15N(2) [K4; K11]; 1xLabel:13C(6)15N(4) [R12]	3.51527e-06	9.84928e-05	2	7	2	P68363; Q9BQE3	P68363 [391-402]; Q9BQE3 [391-402]		2	1562.84	1.516	0.0716302	0	79.5	120.5	1.64373e+07	1.9141e+07	3434	Shared	Heavy	Peak Found	High	High	0.26	0.0001206	2.509e-06	2.9	26.18
	TRUE	High	[R].LDHKFDLMYAKR.[A]	1xOxidation [M8]; 2xLabel:13C(6)15N(2) [K4; K11]; 1xLabel:13C(6)15N(4) [R12]	0.00138717	0.000424254	2	7	1	P68363; Q9BQE3	P68363 [391-402]; Q9BQE3 [391-402]		2	1578.83	1.567	0.0507455	0	77.9	122.1	12417272	14945700	3433	Shared	Heavy	Peak Found	High	High	0.37	0.0003475	0.001133	1.92	19.99
	TRUE	High	[R].IHFPLATYAPVISAEK.[A]		1.00099e-07	9.84928e-05	2	6	8	P68363; Q9BQE3	P68363 [265-280]; Q9BQE3 [265-280]		0	1756.96	0.995	0.863813	0	100.3	99.7	6.86046e+07	5.24217e+07	3810	Shared	Light	High	Peak Found	High	0.04	0.0001206	6.716e-08	3.81	59.48
	TRUE	High	[R].IHFPLATYAPVISAEK.[A]	1xLabel:13C(6)15N(2) [K16]	2.31256e-07	9.84928e-05	2	6	7	P68363; Q9BQE3	P68363 [265-280]; Q9BQE3 [265-280]		0	1764.98								3810	Redundant	Heavy	Peak Found	High	High	-0.28	0.0001206	1.579e-07	4.5	59.48
	TRUE	High	[R].LISQIVSSITASLR.[F]		0.000181614	9.84928e-05	2	5	2	P68363; Q9BQE3	P68363 [230-243]; Q9BQE3 [230-243]		0	1487.88	1.57	0.172879	0	77.8	122.2	309934	373797	4108	Shared	Light	High	Peak Found	High	0.41	0.0001206	0.000139	3.22	81.6
	TRUE	High	[R].LISQIVSSITASLR.[F]	1xLabel:13C(6)15N(4) [R14]	1.10388e-06	9.84928e-05	2	5	1	P68363; Q9BQE3	P68363 [230-243]; Q9BQE3 [230-243]		0	1497.89								4108	Redundant	Heavy	Peak Found	High	High	0.1	0.0001206	7.695e-07	3.59	81.6
	TRUE	High	[R].NLDIERPTYTNLNR.[L]		0.00278471	0.000632611	2	7	2	P68363; Q9BQE3	P68363 [216-229]; Q9BQE3 [216-229]		0	1718.88	0.962	0.743531	0	101.9	98.1	27214224	20114892	5593	Shared	Light	High	Peak Found	High	-0.52	0.0004992	0.002329	2.82	34.33
	TRUE	High	[R].QLFHPEQLITGK.[E]	1xLabel:13C(6)15N(2) [K12]	0.00022469	9.84928e-05	2	8	3	P68363; Q9BQE3	P68363 [85-96]; Q9BQE3 [85-96]		0	1418.79								5964	Redundant	Heavy	Peak Found	High	High	0.45	0.0001206	0.0001721	2	44.3
	TRUE	High	[R].QLFHPEQLITGKEDAANNYAR.[G]		1.12723e-06	9.84928e-05	2	6	7	P68363; Q9BQE3	P68363 [85-105]; Q9BQE3 [85-105]		1	2415.21	1.095	0.782794	0	95.5	104.5	73474220	61768460	5965	Shared	Light	High	Peak Found	High	0.14	0.0001206	7.904e-07	4.4	45.69
	TRUE	High	[R].QLFHPEQLITGKEDAANNYAR.[G]	1xLabel:13C(6)15N(2) [K12]; 1xLabel:13C(6)15N(4) [R21]	6.36083e-07	9.84928e-05	2	6	5	P68363; Q9BQE3	P68363 [85-105]; Q9BQE3 [85-105]		1	2433.23								5965	Redundant	Heavy	Peak Found	High	High	-0.13	0.0001206	4.397e-07	4.77	45.69
	TRUE	High	[R].SIQFVDWCPTGFK.[V]	1xCarbamidomethyl [C8]	7.2877e-05	9.84928e-05	1	2	2	P68363	P68363 [340-352]		0	1584.75	1.117	0.725341	0	94.5	105.5	6.0172e+06	5162758	6568		Light	High	Peak Found	High	-0.31	0.0001206	5.48e-05	3.61	64.82
	TRUE	High	[R].SIQFVDWCPTGFK.[V]	1xCarbamidomethyl [C8]; 1xLabel:13C(6)15N(2) [K13]	0.000309656	9.84928e-05	1	2	1	P68363	P68363 [340-352]		0	1592.77								6568	Redundant	Heavy	Peak Found	High	High	0.05	0.0001206	0.0002403	3.45	64.82
	TRUE	High	[K].TIGGGDDSFNTFFSETGAGK.[H]		2.34432e-09	9.84928e-05	2	5	5	P68363; Q9BQE3	P68363 [41-60]; Q9BQE3 [41-60]		0	2007.89	1.279	0.31523	0	87.8	112.2	6.81351e+07	66923235	7151	Shared	Light	High	Peak Found	High	-0.15	0.0001206	1.477e-09	6.21	59.65
	TRUE	High	[K].TIGGGDDSFNTFFSETGAGK.[H]	1xLabel:13C(6)15N(2) [K20]	4.45476e-09	9.84928e-05	2	5	5	P68363; Q9BQE3	P68363 [41-60]; Q9BQE3 [41-60]		0	2015.91								7151	Redundant	Heavy	Peak Found	High	High	0.14	0.0001206	2.842e-09	5.65	59.65
	TRUE	High	[K].TIGGGDDSFNTFFSETGAGKHVPR.[A]		2.11096e-05	9.84928e-05	2	5	2	P68363; Q9BQE3	P68363 [41-64]; Q9BQE3 [41-64]		1	2497.17	1.173	0.550135	0	92.1	107.9	3.35254e+07	3.01896e+07	7153	Shared	Light	High	Peak Found	High	-0.22	0.0001206	1.552e-05	2.55	51.68
	TRUE	High	[K].TIGGGDDSFNTFFSETGAGKHVPR.[A]	1xLabel:13C(6)15N(2) [K20]; 1xLabel:13C(6)15N(4) [R24]	1.38971e-06	9.84928e-05	2	5	3	P68363; Q9BQE3	P68363 [41-64]; Q9BQE3 [41-64]		1	2515.2								7153	Redundant	Heavy	Peak Found	High	High	0.36	0.0001206	9.729e-07	2.71	51.68
	TRUE	High	[K].VGINYQPPTVVPGGDLAK.[V]		6.10002e-07	9.84928e-05	2	7	4	P68363; Q9BQE3	P68363 [353-370]; Q9BQE3 [353-370]		0	1824.99								7754	Redundant	Light	High	Peak Found	High	-0.78	0.0001206	4.223e-07	3.98	50.5
	TRUE	High	[K].VGINYQPPTVVPGGDLAK.[V]	1xLabel:13C(6)15N(2) [K18]	1.17542e-06	9.84928e-05	2	7	2	P68363; Q9BQE3	P68363 [353-370]; Q9BQE3 [353-370]		0	1833	0.842	0.339183	0	108.6	91.4	149963217	96919101	7754	Shared	Heavy	Peak Found	High	High	-0.19	0.0001206	8.213e-07	3.71	50.5
TRUE	High	Master Protein	O14828	Secretory carrier-associated membrane protein 3 OS=Homo sapiens OX=9606 GN=SCAMP3 PE=1 SV=3	0	251.488	36	9	92	9	347	38.3	7.64	349.12	9	Pf04144	10067	ENSG00000116521; ENSG00000263290	SCAMP3	A9Z1W6; B1AVS6; hsa:10067; O14828; O15128; Q96FR8; Q9BPY0				0	0	0.845	0.505388	32.58	113.2	86.8	8.73486e+08	5.14401e+08	High	High	1
	Checked	Confidence	Annotated Sequence	Modifications	Qvality PEP	Qvality q-value	# Protein Groups	# Proteins	# PSMs	Master Protein Accessions	Positions in Master Proteins	Modifications in Master Proteins	# Missed Cleavages	Theo. MH+ [Da]	Abundance Ratio: (Heavy) / (Light)	Abundance Ratio P-Value: (Heavy) / (Light)	Abundance Ratio Variability [%]: (Heavy) / (Light)	Abundances (Grouped): Light	Abundances (Grouped): Heavy	Abundance: F1: Light, Sample	Abundance: F1: Heavy, Sample	Precursor Quan Result ID	Quan Info	Quan Channel	Found in Sample: [S1] F1: Light, Sample	Found in Sample: [S3] F1: Heavy, Sample	Confidence (by Search Engine): Sequest HT	DeltaM [ppm] (by Search Engine): Sequest HT	Percolator q-Value (by Search Engine): Sequest HT	Percolator PEP (by Search Engine): Sequest HT	XCorr (by Search Engine): Sequest HT	Top Apex RT [min]
	TRUE	High	[K].AQQEFAAGVFSNPAVR.[T]		1.67734e-08	9.84928e-05	1	1	5	O14828	O14828 [314-329]		0	1691.85								621	Redundant	Light	High	Peak Found	High	-0.39	0.0001206	1.094e-08	5.2	47.32
	TRUE	High	[K].AQQEFAAGVFSNPAVR.[T]	1xLabel:13C(6)15N(4) [R16]	4.24306e-08	9.84928e-05	1	1	6	O14828	O14828 [314-329]		0	1701.86	0.863	0.400605	0	107.4	92.6	183415406	121492039	621		Heavy	Peak Found	High	High	-0.54	0.0001206	2.813e-08	5.8	47.32
	TRUE	High	[R].DGGNPFAEPSELDNPFQDPAVIQHRPSR.[Q]		1.00801e-05	9.84928e-05	1	1	6	O14828	O14828 [6-33]		0	3090.47	0.533	0.0019671	0	130.5	69.5	156405156	64012871	1031		Light	High	Peak Found	High	0.08	0.0001206	7.31e-06	3.7	58.48
	TRUE	High	[R].DGGNPFAEPSELDNPFQDPAVIQHRPSR.[Q]	2xLabel:13C(6)15N(4) [R25; R28]	1.09604e-07	9.84928e-05	1	1	3	O14828	O14828 [6-33]		0	3110.48								1031	Redundant	Heavy	Peak Found	High	High	-0.12	0.0001206	7.352e-08	5.29	58.48
	TRUE	High	[R].EPPPAYEPPAPAPLPPPSAPSLQPSR.[K]		1.24261e-05	9.84928e-05	1	1	7	O14828	O14828 [48-73]		0	2660.37	0.169	1e-17	0	171.1	28.9	39386001	5.1158e+06	1952		Light	High	Peak Found	High	3.26	0.0001206	9.02e-06	3.28	53.32
	TRUE	High	[R].EPPPAYEPPAPAPLPPPSAPSLQPSR.[K]	1xLabel:13C(6)15N(4) [R26]	0.000125136	9.84928e-05	1	1	3	O14828	O14828 [48-73]		0	2670.38								1952	Redundant	Heavy	Peak Found	High	High	0.41	0.0001206	9.5e-05	3.91	53.28
	TRUE	High	[R].EPPPAYEPPAPAPLPPPSAPSLQPSRK.[L]		1.29605e-06	9.84928e-05	1	1	7	O14828	O14828 [48-74]		1	2788.47								1954	Redundant	Light	High	Peak Found	High	-0.09	0.0001206	9.093e-07	3.28	46.68
	TRUE	High	[R].EPPPAYEPPAPAPLPPPSAPSLQPSRK.[L]	1xLabel:13C(6)15N(2) [K27]; 1xLabel:13C(6)15N(4) [R26]	6.70485e-05	9.84928e-05	1	1	2	O14828	O14828 [48-74]		1	2806.49	0.26	1.0785e-10	0	158.7	41.3	4.53125e+07	9.04878e+06	1954		Heavy	Peak Found	High	High	0.85	0.0001206	5.034e-05	3.05	46.68
	TRUE	High	[K].NYGSYSTQASAAAATAELLK.[K]		4.6122e-10	9.84928e-05	1	1	3	O14828	O14828 [82-101]		0	2016.99	1.083	0.820199	0	96	104	2.28725e+07	1.90308e+07	5815		Light	High	Peak Found	High	0.42	0.0001206	2.836e-10	4.5	54.37
	TRUE	High	[K].NYGSYSTQASAAAATAELLK.[K]	1xLabel:13C(6)15N(2) [K20]	2.02445e-10	9.84928e-05	1	1	3	O14828	O14828 [82-101]		0	2025								5815	Redundant	Heavy	Peak Found	High	High	-0.38	0.0001206	1.232e-10	6.04	54.37
	TRUE	High	[K].NYGSYSTQASAAAATAELLKK.[Q]		2.44532e-07	9.84928e-05	1	1	3	O14828	O14828 [82-102]		1	2145.08	1.116	0.715374	0	94.5	105.5	99276699	8.50609e+07	5817		Light	High	Peak Found	High	0.39	0.0001206	1.663e-07	4.52	47.74
	TRUE	High	[K].NYGSYSTQASAAAATAELLKK.[Q]	2xLabel:13C(6)15N(2) [K20; K21]	1.10368e-05	9.84928e-05	1	1	2	O14828	O14828 [82-102]		1	2161.11								5817	Redundant	Heavy	Peak Found	High	High	-1.57	0.0001206	8.026e-06	5.11	47.74
	TRUE	High	[R].QYATLDVYNPFETR.[E]		7.46818e-07	9.84928e-05	1	1	2	O14828	O14828 [34-47]		0	1716.82	0.887	0.478928	0	106	94	5.33734e+07	3.63686e+07	6137		Light	High	Peak Found	High	-0.08	0.0001206	5.169e-07	4.38	62.72
	TRUE	High	[R].QYATLDVYNPFETR.[E]	1xLabel:13C(6)15N(4) [R14]	1.15913e-06	9.84928e-05	1	1	3	O14828	O14828 [34-47]		0	1726.83								6137	Redundant	Heavy	Peak Found	High	High	0.15	0.0001206	8.112e-07	3.71	62.72
	TRUE	High	[R].TAAANAAAGAAENAFR.[A]		2.41106e-08	9.84928e-05	1	1	5	O14828	O14828 [330-345]		0	1476.72	0.845	0.349923	0	108.4	91.6	117435334	76238598	6913		Light	High	Peak Found	High	-0.16	0.0001206	1.585e-08	5.65	32.94
	TRUE	High	[R].TAAANAAAGAAENAFR.[A]	1xLabel:13C(6)15N(4) [R16]	2.85017e-09	9.84928e-05	1	1	4	O14828	O14828 [330-345]		0	1486.73								6913	Redundant	Heavy	Peak Found	High	High	0.14	0.0001206	1.803e-09	5.54	32.94
	TRUE	High	[R].TAAANAAAGAAENAFRAP.[-]		4.1849e-07	9.84928e-05	1	1	4	O14828	O14828 [330-347]		1	1644.81								6914	Redundant	Light	High	Peak Found	High	0.48	0.0001206	2.871e-07	4.82	40.66
	TRUE	High	[R].TAAANAAAGAAENAFRAP.[-]	1xLabel:13C(6)15N(4) [R16]	1.83661e-08	9.84928e-05	1	1	4	O14828	O14828 [330-347]		1	1654.82	0.785	0.199303	0	112.1	87.9	152161764	91692366	6914		Heavy	Peak Found	High	High	-0.02	0.0001206	1.204e-08	4.17	40.66
TRUE	High	Master Protein	Q9Y3L5	Ras-related protein Rap-2c OS=Homo sapiens OX=9606 GN=RAP2C PE=1 SV=1	0	247.524	76	14	95	7	183	20.7	4.94	364.4	14	Pf00071	57826	ENSG00000123728	RAP2C	B3KWD6; hsa:57826; Q5H9H9; Q9BTS0; Q9Y3L5		Neutrophil degranulation	Tight junction	2	10	0.858	0.542006	13.28	108.1	91.9	2.80066e+08	1.82858e+08	High	High	1
	Checked	Confidence	Annotated Sequence	Modifications	Qvality PEP	Qvality q-value	# Protein Groups	# Proteins	# PSMs	Master Protein Accessions	Positions in Master Proteins	Modifications in Master Proteins	# Missed Cleavages	Theo. MH+ [Da]	Abundance Ratio: (Heavy) / (Light)	Abundance Ratio P-Value: (Heavy) / (Light)	Abundance Ratio Variability [%]: (Heavy) / (Light)	Abundances (Grouped): Light	Abundances (Grouped): Heavy	Abundance: F1: Light, Sample	Abundance: F1: Heavy, Sample	Precursor Quan Result ID	Quan Info	Quan Channel	Found in Sample: [S1] F1: Light, Sample	Found in Sample: [S3] F1: Heavy, Sample	Confidence (by Search Engine): Sequest HT	DeltaM [ppm] (by Search Engine): Sequest HT	Percolator q-Value (by Search Engine): Sequest HT	Percolator PEP (by Search Engine): Sequest HT	XCorr (by Search Engine): Sequest HT	Top Apex RT [min]
	TRUE	High	[R].ALAQEWGCPFMETSAK.[S]	1xCarbamidomethyl [C8]	0.000605674	0.00021741	1	1	2	Q9Y3L5	Q9Y3L5 [133-148]		0	1825.82	0.782	0.283344	0	112.2	87.8	6167612	3.7031e+06	326		Light	High	Peak Found	High	0.09	0.0002	0.0004796	3.28	55.3
	TRUE	High	[R].ALAQEWGCPFMETSAK.[S]	1xCarbamidomethyl [C8]; 1xLabel:13C(6)15N(2) [K16]	0.00253753	0.000534724	1	1	2	Q9Y3L5	Q9Y3L5 [133-148]		0	1833.84								326	Redundant	Heavy	Peak Found	High	High	-0.06	0.0004281	0.002121	3.05	55.3
	TRUE	High	[R].ALAQEWGCPFMETSAK.[S]	1xCarbamidomethyl [C8]; 1xOxidation [M11]	4.1492e-05	9.84928e-05	1	1	3	Q9Y3L5	Q9Y3L5 [133-148]		0	1841.82	0.495	0.0116468	0	133.8	66.2	4.07081e+06	1546625	324		Light	High	Peak Found	High	-0.05	0.0001206	3.082e-05	3.27	47.42
	TRUE	High	[R].ALAQEWGCPFMETSAK.[S]	1xCarbamidomethyl [C8]; 1xDeamidated [Q4]; 1xOxidation [M11]	0.0134169	0.00137984	1	1	1	Q9Y3L5	Q9Y3L5 [133-148]		0	1842.8	0.878	0.430045	0	106.5	93.5	10643860	7.18006e+06	325		Light	High	Peak Found	High	0.09	0.001311	0.01057	3.22	58.96
	TRUE	High	[R].ALAQEWGCPFMETSAK.[S]	1xCarbamidomethyl [C8]; 1xOxidation [M11]; 1xLabel:13C(6)15N(2) [K16]	0.00170978	0.000424254	1	1	1	Q9Y3L5	Q9Y3L5 [133-148]		0	1849.83								324	Redundant	Heavy	Peak Found	High	High	0.06	0.0003475	0.001412	2.95	47.42
	TRUE	High	[K].EIEVDSSPSVLEILDTAGTEQFASMR.[D]		1.07331e-05	9.84928e-05	3	3	2	P10114; Q9Y3L5; P61225	P10114 [43-68]; Q9Y3L5 [43-68]; P61225 [43-68]		0	2824.36	0.787	0.467361	0	111.9	88.1	895308	541167	1798	Shared	Light	High	Peak Found	High	-0.22	0.0001206	7.794e-06	5.48	85.09
	TRUE	High	[K].EIEVDSSPSVLEILDTAGTEQFASMR.[D]	1xDeamidated [Q21]	0.000115168	9.84928e-05	3	3	3	P10114; Q9Y3L5; P61225	P10114 [43-68]; Q9Y3L5 [43-68]; P61225 [43-68]		0	2825.34								1799	No Quan Values	Light	High	Not Found	High	4.72	0.0001206	8.695e-05	4.36
	TRUE	High	[K].EIEVDSSPSVLEILDTAGTEQFASMR.[D]	1xLabel:13C(6)15N(4) [R26]	6.94185e-05	9.84928e-05	3	3	2	P10114; Q9Y3L5; P61225	P10114 [43-68]; Q9Y3L5 [43-68]; P61225 [43-68]		0	2834.36								1798	Redundant	Heavy	Peak Found	High	High	0.11	0.0001206	5.187e-05	3.62	85.09
	TRUE	High	[K].EIEVDSSPSVLEILDTAGTEQFASMR.[D]	1xOxidation [M25]	7.78511e-09	9.84928e-05	3	3	5	P10114; Q9Y3L5; P61225	P10114 [43-68]; Q9Y3L5 [43-68]; P61225 [43-68]		0	2840.35								1796	Redundant	Light	High	Peak Found	High	0.65	0.0001206	5.014e-09	7.88	79.68
	TRUE	High	[K].EIEVDSSPSVLEILDTAGTEQFASMR.[D]	1xOxidation [M25]; 1xLabel:13C(6)15N(4) [R26]	1.16672e-09	9.84928e-05	3	3	4	P10114; Q9Y3L5; P61225	P10114 [43-68]; Q9Y3L5 [43-68]; P61225 [43-68]		0	2850.36	0.786	0.262655	0	112	88	9.05265e+06	5.46338e+06	1796	Shared	Heavy	Peak Found	High	High	0.81	0.0001206	7.291e-10	7.66	79.68
	TRUE	High	[R].EYKVVVLGSGGVGK.[S]	2xLabel:13C(6)15N(2) [K3; K14]	0.0281041	0.00254153	3	3	1	P10114; Q9Y3L5; P61225	P10114 [3-16]; Q9Y3L5 [3-16]; P61225 [3-16]		1	1407.82	1.094	0.789346	0	95.5	104.5	6842682	5.74699e+06	2142	Shared	Heavy	Peak Found	High	High	-0.19	0.002134	0.02111	2.85	29.92
	TRUE	High	[R].KEIEVDSSPSVLEILDTAGTEQFASMR.[D]		1.1349e-05	9.84928e-05	3	3	2	P10114; Q9Y3L5; P61225	P10114 [42-68]; Q9Y3L5 [42-68]; P61225 [42-68]		1	2952.45	0.848	0.442897	0	108.2	91.8	3.13742e+06	2.04435e+06	3108	Shared	Light	High	Peak Found	High	0.16	0.0001206	8.247e-06	5.17	76.65
	TRUE	High	[R].KEIEVDSSPSVLEILDTAGTEQFASMR.[D]	1xOxidation [M26]	1.46901e-05	9.84928e-05	3	3	2	P10114; Q9Y3L5; P61225	P10114 [42-68]; Q9Y3L5 [42-68]; P61225 [42-68]		1	2968.45	100	1e-17			200		4.98278e+06	3110	Shared	Light	High	Peak Found	High	0.06	0.0001206	1.071e-05	5.21	71.26
	TRUE	High	[R].KEIEVDSSPSVLEILDTAGTEQFASMR.[D]	1xLabel:13C(6)15N(2) [K1]; 1xLabel:13C(6)15N(4) [R27]	2.24916e-06	9.84928e-05	3	3	2	P10114; Q9Y3L5; P61225	P10114 [42-68]; Q9Y3L5 [42-68]; P61225 [42-68]		1	2970.47								3108	Redundant	Heavy	Peak Found	High	High	-0.19	0.0001206	1.591e-06	6.1	76.65
	TRUE	High	[R].KEIEVDSSPSVLEILDTAGTEQFASMR.[D]	1xDeamidated [Q22]; 1xLabel:13C(6)15N(2) [K1]; 1xLabel:13C(6)15N(4) [R27]	0.00159112	0.000424254	3	3	2	P10114; Q9Y3L5; P61225	P10114 [42-68]; Q9Y3L5 [42-68]; P61225 [42-68]		1	2971.46								3109	Redundant	Heavy	Not Found	High	High	4.68	0.0003475	0.001312	3.88
	TRUE	High	[R].KEIEVDSSPSVLEILDTAGTEQFASMR.[D]	1xOxidation [M26]; 1xLabel:13C(6)15N(2) [K1]; 1xLabel:13C(6)15N(4) [R27]	3.71179e-05	9.84928e-05	3	3	2	P10114; Q9Y3L5; P61225	P10114 [42-68]; Q9Y3L5 [42-68]; P61225 [42-68]		1	2986.47								3110	Redundant	Heavy	Not Found	High	High	-0.54	0.0001206	2.745e-05	6.7	71.26
	TRUE	High	[K].NGQGFILVYSLVNQQSFQDIKPMR.[D]	1xOxidation [M23]	3.79015e-05	9.84928e-05	3	3	2	P10114; Q9Y3L5; P61225	P10114 [74-97]; Q9Y3L5 [74-97]; P61225 [74-97]		0	2798.43	0.895	0.574498	0	105.6	94.4	3.1291e+06	2.14968e+06	5552	Shared	Light	High	Peak Found	High	0.31	0.0001206	2.818e-05	4.5	73.06
	TRUE	High	[K].NGQGFILVYSLVNQQSFQDIKPMR.[D]	1xLabel:13C(6)15N(2) [K21]; 1xLabel:13C(6)15N(4) [R24]	0.000516372	0.00021741	3	3	1	P10114; Q9Y3L5; P61225	P10114 [74-97]; Q9Y3L5 [74-97]; P61225 [74-97]		0	2800.46	0.756	0.414534	0	113.9	86.1	793016	460477	5553	Shared	Heavy	Peak Found	High	High	-0.83	0.0002	0.0004075	3.57	76.36
	TRUE	High	[K].NGQGFILVYSLVNQQSFQDIKPMR.[D]	1xOxidation [M23]; 1xLabel:13C(6)15N(2) [K21]; 1xLabel:13C(6)15N(4) [R24]	0.000268402	9.84928e-05	3	3	2	P10114; Q9Y3L5; P61225	P10114 [74-97]; Q9Y3L5 [74-97]; P61225 [74-97]		0	2816.45								5552	Redundant	Heavy	Peak Found	High	High	-1.3	0.0001206	0.0002074	3.52	73.06
	TRUE	High	[K].SALTVQFVTGTFIEK.[Y]		4.61459e-06	9.84928e-05	2	2	1	P10114; Q9Y3L5	P10114 [17-31]; Q9Y3L5 [17-31]		0	1640.89	0.776	0.38141	0	112.6	87.4	1.80793e+06	1.07759e+06	6267	Shared	Light	High	Peak Found	High	2	0.0001206	3.296e-06	3.72	65.74
	TRUE	High	[K].SALTVQFVTGTFIEK.[Y]	1xLabel:13C(6)15N(2) [K15]	1.82347e-05	9.84928e-05	2	2	1	P10114; Q9Y3L5	P10114 [17-31]; Q9Y3L5 [17-31]		0	1648.9								6267	Redundant	Heavy	Peak Found	High	High	-0.18	0.0001206	1.331e-05	2.36	65.74
	TRUE	High	[K].SKSMVDELFAEIVR.[Q]		5.07704e-05	9.84928e-05	1	1	1	Q9Y3L5	Q9Y3L5 [149-162]		1	1623.84								6480	Redundant	Light	High	Peak Found	High	0.45	0.0001206	3.783e-05	4	74.86
	TRUE	High	[K].SKSMVDELFAEIVR.[Q]	1xOxidation [M4]	0.000238971	9.84928e-05	1	1	2	Q9Y3L5	Q9Y3L5 [149-162]		1	1639.84								6481	Redundant	Light	High	Peak Found	High	0.19	0.0001206	0.0001841	2.97	62.85
	TRUE	High	[K].SKSMVDELFAEIVR.[Q]	1xLabel:13C(6)15N(2) [K2]; 1xLabel:13C(6)15N(4) [R14]	0.000262963	9.84928e-05	1	1	2	Q9Y3L5	Q9Y3L5 [149-162]		1	1641.86	1.036	0.947468	0	98.2	101.8	1.35059e+06	1.07486e+06	6480		Heavy	Peak Found	High	High	-0.85	0.0001206	0.0002022	3.79	74.86
	TRUE	High	[K].SKSMVDELFAEIVR.[Q]	1xOxidation [M4]; 1xLabel:13C(6)15N(2) [K2]; 1xLabel:13C(6)15N(4) [R14]	0.00299667	0.000632611	1	1	1	Q9Y3L5	Q9Y3L5 [149-162]		1	1657.86	0.801	0.434322	0	111.1	88.9	1.68571e+06	1.0367e+06	6481		Heavy	Peak Found	High	High	-0.22	0.0004992	0.002505	2.99	62.85
	TRUE	High	[K].SMVDELFAEIVR.[Q]		6.27265e-06	9.84928e-05	1	1	2	Q9Y3L5	Q9Y3L5 [151-162]		0	1408.71	0.858	0.565211	0	107.7	92.3	2.23608e+06	1.47264e+06	6612		Light	High	Peak Found	High	0.03	0.0001206	4.504e-06	4.08	84.1
	TRUE	High	[K].SMVDELFAEIVR.[Q]	1xLabel:13C(6)15N(4) [R12]	9.33556e-06	9.84928e-05	1	1	2	Q9Y3L5	Q9Y3L5 [151-162]		0	1418.72								6612	Redundant	Heavy	Peak Found	High	High	0.49	0.0001206	6.751e-06	3.97	84.1
	TRUE	High	[K].SMVDELFAEIVR.[Q]	1xOxidation [M2]	3.30131e-06	9.84928e-05	1	1	2	Q9Y3L5	Q9Y3L5 [151-162]		0	1424.71	0.908	0.54318	0	104.8	95.2	10299707	7.18577e+06	6613		Light	High	Peak Found	High	-0.24	0.0001206	2.342e-06	4.12	70.42
	TRUE	High	[K].SMVDELFAEIVR.[Q]	1xOxidation [M2]; 1xLabel:13C(6)15N(4) [R12]	4.24397e-06	9.84928e-05	1	1	2	Q9Y3L5	Q9Y3L5 [151-162]		0	1434.72								6613	Redundant	Heavy	Peak Found	High	High	0.13	0.0001206	3.024e-06	3.71	70.42
	TRUE	High	[RK].VPIILVGNK.[SV]		0.000359441	9.84928e-05	2	2	2	Q8IXI1; Q9Y3L5	Q8IXI1 [111-119]; Q9Y3L5 [109-117]		0	952.619								8047	Redundant	Light	High	Peak Found	High	0.38	0.0001206	0.0002789	2.09	38.69
	TRUE	High	[K].VPLILVGNK.[V]	1xDeamidated [N8]	0.0252062	0.00211525	1	1	1	Q9Y3L5	Q9Y3L5 [109-117]		0	953.603	1.161	0.587338	0	92.5	107.5	12821684	11435104	8048		Light	High	Peak Found	High	0.31	0.001829	0.01908	1.91	38.48
	TRUE	High	[K].VPLILVGNK.[V]	1xLabel:13C(6)15N(2) [K9]	0.00311946	0.000632611	1	1	1	Q9Y3L5	Q9Y3L5 [109-117]		0	960.633	0.895	0.455357	0	105.5	94.5	12941852	8896715	8047		Heavy	Peak Found	High	High	0.03	0.0004992	0.002601	1.61	38.69
	TRUE	High	[K].VPLILVGNKVDLEPER.[E]		7.52048e-07	9.84928e-05	1	1	4	Q9Y3L5	Q9Y3L5 [109-124]		1	1791.04								8049	Redundant	Light	High	Peak Found	High	-0.23	0.0001206	5.219e-07	6.2	53.87
	TRUE	High	[K].VPLILVGNKVDLEPER.[E]	1xLabel:13C(6)15N(2) [K9]; 1xLabel:13C(6)15N(4) [R16]	1.86295e-06	9.84928e-05	1	1	4	Q9Y3L5	Q9Y3L5 [109-124]		1	1809.06	0.678	0.0488742	0	119.2	80.8	4.6001e+07	2.3942e+07	8049		Heavy	Peak Found	High	High	0.11	0.0001206	1.315e-06	5.17	53.87
	TRUE	High	[K].YDPTIEDFYR.[K]	1xLabel:13C(6)15N(4) [R10]	0.00070064	0.00021741	3	3	2	P10114; Q9Y3L5; P61225	P10114 [32-41]; Q9Y3L5 [32-41]; P61225 [32-41]		0	1328.6	0.859	0.388664	0	107.6	92.4	38043900	25084358	8346	Shared	Heavy	Peak Found	High	High	0.06	0.0002	0.0005599	2.06	49.63
	TRUE	High	[K].YDPTIEDFYRK.[E]		0.00511233	0.000965695	3	3	1	P10114; Q9Y3L5; P61225	P10114 [32-42]; Q9Y3L5 [32-42]; P61225 [32-42]		1	1446.69								8347	Redundant	Light	High	Peak Found	High	-0.25	0.0008827	0.004245	1.36	39.55
	TRUE	High	[K].YDPTIEDFYRK.[E]	1xLabel:13C(6)15N(2) [K11]; 1xLabel:13C(6)15N(4) [R10]	0.00109615	0.000339819	3	3	1	P10114; Q9Y3L5; P61225	P10114 [32-42]; Q9Y3L5 [32-42]; P61225 [32-42]		1	1464.71	0.882	0.460664	0	106.3	93.7	75533312	51142640	8347	Shared	Heavy	Peak Found	High	High	0.63	0.0002	0.0008902	2.64	39.55
	TRUE	High	[R].YEKVPLILVGNK.[V]	2xLabel:13C(6)15N(2) [K3; K12]	0.00589653	0.000965695	1	1	1	Q9Y3L5	Q9Y3L5 [106-117]		1	1388.85	0.909	0.633818	0	104.8	95.2	6017851	4.19889e+06	8361		Heavy	Peak Found	High	High	-0.11	0.0008827	0.004875	2.74	41.3
	TRUE	High	[R].YEKVPLILVGNKVDLEPER.[E]		8.54921e-05	9.84928e-05	1	1	2	Q9Y3L5	Q9Y3L5 [106-124]		2	2211.24								8362	Redundant	Light	High	Peak Found	High	-0.29	0.0001206	6.452e-05	4.16	54.32
	TRUE	High	[R].YEKVPLILVGNKVDLEPER.[E]	2xLabel:13C(6)15N(2) [K3; K12]; 1xLabel:13C(6)15N(4) [R19]	8.3731e-05	9.84928e-05	1	1	4	Q9Y3L5	Q9Y3L5 [106-124]		2	2237.28	0.612	0.0142858	0	124.1	75.9	2.65937e+07	1.24919e+07	8362		Heavy	Peak Found	High	High	0.83	0.0001206	6.305e-05	3.51	54.32
TRUE	High	Master Protein	Q9BVA1	Tubulin beta-2B chain OS=Homo sapiens OX=9606 GN=TUBB2B PE=1 SV=1	0	240.5	52	16	109	4	445	49.9	4.89	379.48	16	Pf00091, Pf03953	347733	ENSG00000137285	TUBB2B	A8K068; hsa:347733; Q9BVA1	Alzheimer's disease and miRNA effects; Pathogenic Escherichia coli infection; Parkin-ubiquitin proteasomal system pathway; Alzheimer's disease	Separation of Sister Chromatids; The role of GTSE1 in G2/M progression after G2 checkpoint; Resolution of Sister Chromatid Cohesion; RHO GTPases Activate Formins; EML4 and NUDC in mitotic spindle formation; COPI-mediated anterograde transport; Recruitment of NuMA to mitotic centrosomes; HCMV Early Events; COPI-independent Golgi-to-ER retrograde traffic; HSP90 chaperone cycle for steroid hormone r…	Phagosome; Gap junction; Alzheimer disease; Parkinson disease; Amyotrophic lateral sclerosis; Huntington disease; Prion disease; Pathways of neurodegeneration; Pathogenic Escherichia coli infection; Salmonella infection	44	0	1.419	0.172951	33.37	90.4	109.6	9.06395e+06	8.44269e+06	High	High	1
	Checked	Confidence	Annotated Sequence	Modifications	Qvality PEP	Qvality q-value	# Protein Groups	# Proteins	# PSMs	Master Protein Accessions	Positions in Master Proteins	Modifications in Master Proteins	# Missed Cleavages	Theo. MH+ [Da]	Abundance Ratio: (Heavy) / (Light)	Abundance Ratio P-Value: (Heavy) / (Light)	Abundance Ratio Variability [%]: (Heavy) / (Light)	Abundances (Grouped): Light	Abundances (Grouped): Heavy	Abundance: F1: Light, Sample	Abundance: F1: Heavy, Sample	Precursor Quan Result ID	Quan Info	Quan Channel	Found in Sample: [S1] F1: Light, Sample	Found in Sample: [S3] F1: Heavy, Sample	Confidence (by Search Engine): Sequest HT	DeltaM [ppm] (by Search Engine): Sequest HT	Percolator q-Value (by Search Engine): Sequest HT	Percolator PEP (by Search Engine): Sequest HT	XCorr (by Search Engine): Sequest HT	Top Apex RT [min]
	TRUE	High	[R].AILVDLEPGTMDSVR.[S]		2.60382e-07	9.84928e-05	3	4	2	Q13509; P07437; Q9BVA1	Q13509 [63-77]; P07437 [63-77]; Q9BVA1 [63-77]		0	1615.84	1.161	0.580771	0	92.5	107.5	52017316	46390608	401	Shared	Light	High	Peak Found	High	-0.01	0.0001206	1.779e-07	3.93	57
	TRUE	High	[R].AILVDLEPGTMDSVR.[S]	1xLabel:13C(6)15N(4) [R15]	2.77259e-07	9.84928e-05	3	4	2	Q13509; P07437; Q9BVA1	Q13509 [63-77]; P07437 [63-77]; Q9BVA1 [63-77]		0	1625.84								401	Redundant	Heavy	Peak Found	High	High	-0.06	0.0001206	1.889e-07	4.18	57
	TRUE	High	[R].AILVDLEPGTMDSVR.[S]	1xOxidation [M11]	2.17179e-07	9.84928e-05	3	4	5	Q13509; P07437; Q9BVA1	Q13509 [63-77]; P07437 [63-77]; Q9BVA1 [63-77]		0	1631.83	1.214	0.44632	0	90.3	109.7	44353856	41364216	400	Shared	Light	High	Peak Found	High	-0.04	0.0001206	1.481e-07	3.99	48.7
	TRUE	High	[R].AILVDLEPGTMDSVR.[S]	1xOxidation [M11]; 1xLabel:13C(6)15N(4) [R15]	2.15669e-07	9.84928e-05	3	4	2	Q13509; P07437; Q9BVA1	Q13509 [63-77]; P07437 [63-77]; Q9BVA1 [63-77]		0	1641.84								400	Redundant	Heavy	Peak Found	High	High	0.13	0.0001206	1.466e-07	3.97	48.7
	TRUE	High	[R].ALTVPELTQQMFDSK.[N]	1xLabel:13C(6)15N(2) [K15]	7.65068e-05	9.84928e-05	1	2	1	Q9BVA1	Q9BVA1 [283-297]		0	1715.88	1.26	0.398005	0	88.5	111.5	3.71409e+06	3.59516e+06	453		Heavy	Peak Found	High	High	-0.16	0.0001206	5.745e-05	2.97	64.5
	TRUE	High	[R].EIVHIQAGQCGNQIGAK.[F]	1xCarbamidomethyl [C10]	1.77414e-06	9.84928e-05	4	6	2	Q13509; P07437; P68371; Q9BVA1	Q13509 [3-19]; P07437 [3-19]; P68371 [3-19]; Q9BVA1 [3-19]		0	1822.92	1.684	0.0398853	0	74.5	125.5	3.23641e+06	4.18464e+06	1875	Shared	Light	High	Peak Found	High	-0.43	0.0001206	1.246e-06	3.7	24.2
	TRUE	High	[R].EIVHLQAGQCGNQIGAK.[F]	1xCarbamidomethyl [C10]; 1xLabel:13C(6)15N(2) [K17]	0.000285384	9.84928e-05	4	6	2	Q13509; P07437; P68371; Q9BVA1	Q13509 [3-19]; P07437 [3-19]; P68371 [3-19]; Q9BVA1 [3-19]		0	1830.94								1875	Redundant	Heavy	Peak Found	High	High	-1.35	0.0001206	0.0002203	3.76
	TRUE	High	[K].EVDEQMLNVQNK.[N]		2.65919e-06	9.84928e-05	3	4	3	P07437; P68371; Q9BVA1	P07437 [325-336]; P68371 [325-336]; Q9BVA1 [325-336]		0	1446.69	1.347	0.212733	0	85.2	114.8	50393496	52119832	2088	Shared	Light	High	Peak Found	High	-0.15	0.0001206	1.885e-06	4.65	28.23
	TRUE	High	[K].EVDEQMLNVQNK.[N]	1xLabel:13C(6)15N(2) [K12]	1.6424e-05	9.84928e-05	3	4	3	P07437; P68371; Q9BVA1	P07437 [325-336]; P68371 [325-336]; Q9BVA1 [325-336]		0	1454.7								2088	Redundant	Heavy	Peak Found	High	High	0.16	0.0001206	1.204e-05	4.31	28.23
	TRUE	High	[K].EVDEQMLNVQNK.[N]	1xOxidation [M6]	0.000176684	9.84928e-05	3	4	9	P07437; P68371; Q9BVA1	P07437 [325-336]; P68371 [325-336]; Q9BVA1 [325-336]		0	1462.68	1.629	0.125727	0	76.1	123.9	773307	967422	2089	Shared	Light	High	Peak Found	High	-0.19	0.0001206	0.000135	3.25	21.55
	TRUE	High	[K].EVDEQMLNVQNK.[N]	1xOxidation [M6]; 1xLabel:13C(6)15N(2) [K12]	0.000252406	9.84928e-05	3	4	4	P07437; P68371; Q9BVA1	P07437 [325-336]; P68371 [325-336]; Q9BVA1 [325-336]		0	1470.7								2089	Redundant	Heavy	Peak Found	High	High	0.96	0.0001206	0.0001944	3.51	21.55
	TRUE	High	[R].FPGQLNADLRK.[L]		0.0154181	0.00146171	4	10	2	Q13509; P07437; P68371; Q9BVA1	Q13509 [242-252]; P07437 [242-252]; P68371 [242-252]; Q9BVA1 [242-252]		1	1258.69								2296	Redundant	Light	High	Peak Found	High	-0.62	0.001368	0.01206	2.71	26.14
	TRUE	High	[R].FPGQLNADLRK.[L]	1xLabel:13C(6)15N(2) [K11]; 1xLabel:13C(6)15N(4) [R10]	0.00276625	0.000632611	4	10	2	Q13509; P07437; P68371; Q9BVA1	Q13509 [242-252]; P07437 [242-252]; P68371 [242-252]; Q9BVA1 [242-252]		1	1276.71	1.222	0.446221	0	90	110	9515868	8932223	2296	Shared	Heavy	Peak Found	High	High	0.36	0.0004992	0.002315	1.85	26.14
	TRUE	High	[K].GHYTEGAELVDSVLDVVR.[K]		1.63117e-08	9.84928e-05	4	5	4	Q13509; P07437; P68371; Q9BVA1	Q13509 [104-121]; P07437 [104-121]; P68371 [104-121]; Q9BVA1 [104-121]		0	1958.98	1.369	0.188706	0	84.4	115.6	9.21156e+06	9.68214e+06	2600	Shared	Light	High	Peak Found	High	-0.12	0.0001206	1.065e-08	4.68	71.8
	TRUE	High	[K].GHYTEGAELVDSVLDVVR.[K]	1xLabel:13C(6)15N(4) [R18]	9.39767e-10	9.84928e-05	4	5	3	Q13509; P07437; P68371; Q9BVA1	Q13509 [104-121]; P07437 [104-121]; P68371 [104-121]; Q9BVA1 [104-121]		0	1968.99								2600	Redundant	Heavy	Peak Found	High	High	0.45	0.0001206	5.86e-10	5.51	71.8
	TRUE	High	[K].GHYTEGAELVDSVLDVVRK.[E]		3.48944e-09	9.84928e-05	4	5	4	Q13509; P07437; P68371; Q9BVA1	Q13509 [104-122]; P07437 [104-122]; P68371 [104-122]; Q9BVA1 [104-122]		1	2087.08	1.37	0.184524	0	84.4	115.6	1.74903e+07	1.84046e+07	2601	Shared	Light	High	Peak Found	High	-0.04	0.0001206	2.215e-09	5.74	67.09
	TRUE	High	[K].GHYTEGAELVDSVLDVVRK.[E]	1xLabel:13C(6)15N(2) [K19]; 1xLabel:13C(6)15N(4) [R18]	7.26153e-08	9.84928e-05	4	5	5	Q13509; P07437; P68371; Q9BVA1	Q13509 [104-122]; P07437 [104-122]; P68371 [104-122]; Q9BVA1 [104-122]		1	2105.1								2601	Redundant	Heavy	Peak Found	High	High	-0.01	0.0001206	4.855e-08	4.3	67.09
	TRUE	High	[K].LAVNMVPFPR.[L]		3.25173e-05	9.84928e-05	4	10	2	Q13509; P07437; P68371; Q9BVA1	Q13509 [253-262]; P07437 [253-262]; P68371 [253-262]; Q9BVA1 [253-262]		0	1143.63								3399	Redundant	Light	High	Peak Found	High	0.04	0.0001206	2.404e-05	3.25	52.79
	TRUE	High	[K].LAVNMVPFPR.[L]	1xLabel:13C(6)15N(4) [R10]	1.4588e-05	9.84928e-05	4	10	2	Q13509; P07437; P68371; Q9BVA1	Q13509 [253-262]; P07437 [253-262]; P68371 [253-262]; Q9BVA1 [253-262]		0	1153.64	1.086	0.810047	0	95.9	104.1	56063932	46777856	3399	Shared	Heavy	Peak Found	High	High	0.18	0.0001206	1.065e-05	3.99	52.79
	TRUE	High	[K].LAVNMVPFPR.[L]	1xOxidation [M5]	5.04185e-05	9.84928e-05	4	10	2	Q13509; P07437; P68371; Q9BVA1	Q13509 [253-262]; P07437 [253-262]; P68371 [253-262]; Q9BVA1 [253-262]		0	1159.63	1.084	0.817592	0	96	104	49877290	41529618	3400	Shared	Light	High	Peak Found	High	0.2	0.0001206	3.755e-05	3.49	42.5
	TRUE	High	[K].LAVNMVPFPR.[L]	1xOxidation [M5]; 1xLabel:13C(6)15N(4) [R10]	1.90137e-05	9.84928e-05	4	10	2	Q13509; P07437; P68371; Q9BVA1	Q13509 [253-262]; P07437 [253-262]; P68371 [253-262]; Q9BVA1 [253-262]		0	1169.64								3400	Redundant	Heavy	Peak Found	High	High	-0.08	0.0001206	1.393e-05	3.34	42.5
	TRUE	High	[R].LHFFMPGFAPLTSR.[G]		8.06399e-07	9.84928e-05	3	8	3	P07437; P68371; Q9BVA1	P07437 [263-276]; P68371 [263-276]; Q9BVA1 [263-276]		0	1620.84	1.066	0.878654	0	96.8	103.2	1.7264e+07	1.41373e+07	3808	Shared	Light	High	Peak Found	High	-0.02	0.0001206	5.624e-07	3.72	69.54
	TRUE	High	[R].LHFFMPGFAPLTSR.[G]	1xLabel:13C(6)15N(4) [R14]	1.66615e-06	9.84928e-05	3	8	5	P07437; P68371; Q9BVA1	P07437 [263-276]; P68371 [263-276]; Q9BVA1 [263-276]		0	1630.84								3808	Redundant	Heavy	Peak Found	High	High	-0.28	0.0001206	1.173e-06	3.47	69.54
	TRUE	High	[R].LHFFMPGFAPLTSR.[G]	1xOxidation [M5]	9.27066e-06	9.84928e-05	3	8	6	P07437; P68371; Q9BVA1	P07437 [263-276]; P68371 [263-276]; Q9BVA1 [263-276]		0	1636.83	1.13	0.67175	0	93.9	106.1	2.20853e+07	1.91632e+07	3807	Shared	Light	High	Peak Found	High	0.03	0.0001206	6.691e-06	3.77	60.27
	TRUE	High	[R].LHFFMPGFAPLTSR.[G]	1xOxidation [M5]; 1xLabel:13C(6)15N(4) [R14]	3.74309e-06	9.84928e-05	3	8	3	P07437; P68371; Q9BVA1	P07437 [263-276]; P68371 [263-276]; Q9BVA1 [263-276]		0	1646.84								3807	Redundant	Heavy	Peak Found	High	High	-0.13	0.0001206	2.678e-06	4.14	60.27
	TRUE	High	[R].IMNTFSVMPSPK.[V]		0.00354534	0.00071665	1	3	1	Q9BVA1	Q9BVA1 [163-174]		0	1351.67	0.82	0.422792	0	109.9	90.1	3.48968e+06	2.19884e+06	4168		Light	High	Peak Found	High	1.19	0.0006511	0.00296	2.23	45.06
	TRUE	High	[R].IMNTFSVMPSPK.[V]	2xOxidation [M2; M8]	0.00181355	0.000424254	1	3	1	Q9BVA1	Q9BVA1 [163-174]		0	1383.66	1.879	0.0427144	0	69.5	130.5	1.69495e+06	2.44611e+06	4169		Light	High	Peak Found	High	0.06	0.0003475	0.001501	2.21	26.41
	TRUE	High	[R].INVYYNEATGNK.[Y]		0.0627453	0.00467883	1	1	1	Q9BVA1	Q9BVA1 [47-58]		0	1385.67								4251	No Quan Values	Light	High	Not Found	High	1.93	0.003665	0.04577	2.49
	TRUE	High	[R].INVYYNEATGNK.[Y]	1xLabel:13C(6)15N(2) [K12]	0.0152918	0.00146171	1	1	1	Q9BVA1	Q9BVA1 [47-58]		0	1393.68								4251	Redundant	Heavy	Not Found	High	High	0.05	0.001368	0.012	2.45
	TRUE	High	[R].ISEQFTAMFR.[R]		0.000696024	0.00021741	4	6	1	Q13509; P07437; P68371; Q9BVA1	Q13509 [381-390]; P07437 [381-390]; P68371 [381-390]; Q9BVA1 [381-390]		0	1229.6	0.01	1e-17		200		4.04752e+06		4448	Shared	Light	High	Not Found	High	-0.33	0.0002	0.0005556	3.24	51.86
	TRUE	High	[R].ISEQFTAMFR.[R]	1xOxidation [M8]	0.000400399	9.84928e-05	4	6	1	Q13509; P07437; P68371; Q9BVA1	Q13509 [381-390]; P07437 [381-390]; P68371 [381-390]; Q9BVA1 [381-390]		0	1245.59	1.547	0.088717	0	78.5	121.5	5.12159e+06	6083780	4449	Shared	Light	High	Peak Found	High	-0.17	0.0001206	0.0003124	2.53	38.3
	TRUE	High	[R].ISEQFTAMFR.[R]	1xOxidation [M8]; 1xLabel:13C(6)15N(4) [R10]	0.000293262	9.84928e-05	4	6	1	Q13509; P07437; P68371; Q9BVA1	Q13509 [381-390]; P07437 [381-390]; P68371 [381-390]; Q9BVA1 [381-390]		0	1255.6								4449	Redundant	Heavy	Peak Found	High	High	1.61	0.0001206	0.0002277	2.73	38.3
	TRUE	High	[K].MSATFIGNSTAIQELFKR.[I]	1xLabel:13C(6)15N(2) [K17]; 1xLabel:13C(6)15N(4) [R18]	0.0158039	0.00146171	2	3	1	P68371; Q9BVA1	P68371 [363-380]; Q9BVA1 [363-380]		1	2032.07	1.591	0.148364	0	77.2	122.8	1.33269e+06	1.62825e+06	5284	Shared	Heavy	Peak Found	High	High	0.13	0.001368	0.0123	2.64	66.73
	TRUE	High	[K].MSATFIGNSTAIQELFKR.[I]	1xOxidation [M1]; 1xLabel:13C(6)15N(2) [K17]; 1xLabel:13C(6)15N(4) [R18]	0.0136369	0.00137984	2	3	1	P68371; Q9BVA1	P68371 [363-380]; Q9BVA1 [363-380]		1	2048.06	1.035	0.96436	0	98.3	101.7	1.92419e+06	1.53014e+06	5283	Shared	Heavy	Peak Found	High	High	-0.55	0.001311	0.01077	2.35	62.83
	TRUE	High	[K].NSSYFVEWIPNNVK.[TV]		2.34532e-06	9.84928e-05	4	7	3	Q13509; P07437; P68371; Q9BVA1	Q13509 [337-350]; P07437 [337-350]; P68371 [337-350]; Q9BVA1 [337-350]		0	1696.83								5746	Redundant	Light	High	Peak Found	High	0.17	0.0001206	1.66e-06	4.07	62.76
	TRUE	High	[K].NSSYFVEWIPNNVK.[TV]	1xLabel:13C(6)15N(2) [K14]	1.56474e-06	9.84928e-05	4	7	2	Q13509; P07437; P68371; Q9BVA1	Q13509 [337-350]; P07437 [337-350]; P68371 [337-350]; Q9BVA1 [337-350]		0	1704.85	1.158	0.590034	0	92.7	107.3	47788028	42496376	5746	Shared	Heavy	Peak Found	High	High	-0.35	0.0001206	1.097e-06	3.99	62.76
	TRUE	High	[R].SGPFGQIFRPDNFVFGQSGAGNNWAK.[G]		1.16653e-10	9.84928e-05	3	5	5	P07437; P68371; Q9BVA1	P07437 [78-103]; P68371 [78-103]; Q9BVA1 [78-103]		0	2798.34								6444	Redundant	Light	High	Peak Found	High	0.58	0.0001206	6.991e-11	8.13	71.7
	TRUE	High	[R].SGPFGQIFRPDNFVFGQSGAGNNWAK.[G]	1xLabel:13C(6)15N(2) [K26]; 1xLabel:13C(6)15N(4) [R9]	3.55367e-13	9.84928e-05	3	5	4	P07437; P68371; Q9BVA1	P07437 [78-103]; P68371 [78-103]; Q9BVA1 [78-103]		0	2816.37	1.06	0.899145	0	97.1	102.9	4.42648e+07	3.60477e+07	6444	Shared	Heavy	Peak Found	High	High	0.67	0.000120642	1.94091e-13	8.9	71.7
TRUE	High	Master Protein	P07900	Heat shock protein HSP 90-alpha OS=Homo sapiens OX=9606 GN=HSP90AA1 PE=1 SV=5	0	235.625	36	23	95	14	732	84.6	5.02	306.5	23	Pf00183, Pf02518	3320	ENSG00000080824	HSP90AA1	A8K500; B3KPJ9; hsa:3320; P07900; Q2PP14; Q5CAQ6; Q5CAQ7; Q9BVQ5	Nucleotide-binding oligomerization domain (NOD) pathway; TNF-alpha signaling pathway; Corticotropin-releasing hormone signaling pathway; Aryl hydrocarbon receptor Netpath; Ebstein-Barr virus LMP1 signaling; Aryl hydrocarbon receptor pathway; Constitutive androstane receptor pathway; Pregnane X receptor pathway; Glucocorticoid receptor pathway; Nuclear receptors meta-pathway; NRF2 pathway; VEGFA-V…	The role of GTSE1 in G2/M progression after G2 checkpoint; HSP90 chaperone cycle for steroid hormone receptors (SHR) in the presence of ligand; Recruitment of NuMA to mitotic centrosomes; Aggrephagy; Extra-nuclear estrogen signaling; Regulation of actin dynamics for phagocytic cup formation; Neutrophil degranulation; Regulation of necroptotic cell death; Chaperone Mediated Autophagy; VEGFR2 media…	Protein processing in endoplasmic reticulum; PI3K-Akt signaling pathway; Necroptosis; Antigen processing and presentation; NOD-like receptor signaling pathway; IL-17 signaling pathway; Th17 cell differentiation; Progesterone-mediated oocyte maturation; Estrogen signaling pathway; Salmonella infection; Pathways in cancer; Chemical carcinogenesis; Prostate cancer; Lipid and atherosclerosis; Fluid s…	80	0	1.141	0.611515	22.65	95.2	104.8	1.02315e+08	8.65424e+07	High	High	1
	Checked	Confidence	Annotated Sequence	Modifications	Qvality PEP	Qvality q-value	# Protein Groups	# Proteins	# PSMs	Master Protein Accessions	Positions in Master Proteins	Modifications in Master Proteins	# Missed Cleavages	Theo. MH+ [Da]	Abundance Ratio: (Heavy) / (Light)	Abundance Ratio P-Value: (Heavy) / (Light)	Abundance Ratio Variability [%]: (Heavy) / (Light)	Abundances (Grouped): Light	Abundances (Grouped): Heavy	Abundance: F1: Light, Sample	Abundance: F1: Heavy, Sample	Precursor Quan Result ID	Quan Info	Quan Channel	Found in Sample: [S1] F1: Light, Sample	Found in Sample: [S3] F1: Heavy, Sample	Confidence (by Search Engine): Sequest HT	DeltaM [ppm] (by Search Engine): Sequest HT	Percolator q-Value (by Search Engine): Sequest HT	Percolator PEP (by Search Engine): Sequest HT	XCorr (by Search Engine): Sequest HT	Top Apex RT [min]
	TRUE	High	[K].ADLINNLGTIAK.[SF]		2.17065e-05	9.84928e-05	3	4	1	P07900; P08238; Q58FF8	P07900 [101-112]; P08238 [96-107]; Q58FF8 [96-107]		0	1242.71								120	Redundant	Light	High	Peak Found	High	0.19	0.0001206	1.592e-05	2.6	46.09
	TRUE	High	[K].ADLINNLGTIAK.[SF]	1xLabel:13C(6)15N(2) [K12]	6.63269e-06	9.84928e-05	3	4	3	P07900; P08238; Q58FF8	P07900 [101-112]; P08238 [96-107]; Q58FF8 [96-107]		0	1250.72	1.244	0.381984	0	89.1	110.9	99080736	94652680	120	Shared	Heavy	Peak Found	High	High	0.45	0.0001206	4.789e-06	3.58	46.09
	TRUE	High	[R].ALLFVPR.[R]	1xLabel:13C(6)15N(4) [R7]	0.0025544	0.000534724	1	1	2	P07900	P07900 [339-345]		0	825.522								388	Redundant	Heavy	Peak Found	High	High	-0.02	0.0004281	0.002133	1.73	43.21
	TRUE	High	[K].AQALRDNSTMGYMAAK.[K]	1xOxidation [M13]; 1xLabel:13C(6)15N(2) [K16]; 1xLabel:13C(6)15N(4) [R5]	0.10887	0.00735611	1	1	1	P07900	P07900 [616-631]		1	1761.84								581	No Quan Values	Heavy	Not Found	High	High	-0.02	0.005651	0.07974	2.89
	TRUE	High	[K].EGLELPEDEEEK.[K]		0.000865305	0.00021741	3	5	2	P07900; P08238; Q58FF7	P07900 [547-558]; P08238 [539-550]; Q58FF7 [412-423]		0	1416.64	1.005	0.902691	0	99.7	100.3	42430608	32764642	1693	Shared	Light	High	Peak Found	High	0.33	0.0002	0.0006969	2.75	31.87
	TRUE	High	[K].EGLELPEDEEEK.[K]	1xLabel:13C(6)15N(2) [K12]	1.53178e-05	9.84928e-05	3	5	2	P07900; P08238; Q58FF7	P07900 [547-558]; P08238 [539-550]; Q58FF7 [412-423]		0	1424.65								1693	Redundant	Heavy	Peak Found	High	High	0.31	0.0001206	1.117e-05	2.8	31.87
	TRUE	High	[R].ELISNSSDALDK.[I]		0.0055673	0.000965695	1	2	1	P07900	P07900 [47-58]		0	1291.64	1.174	0.583114	0	92	108	5.37065e+06	4.84369e+06	1830		Light	High	Peak Found	High	1.65	0.0008827	0.004634	2.89	25.08
	TRUE	High	[R].ELISNSSDALDK.[I]	1xLabel:13C(6)15N(2) [K12]	0.00564757	0.000965695	1	2	1	P07900	P07900 [47-58]		0	1299.65								1830	Redundant	Heavy	Peak Found	High	High	-0.17	0.0008827	0.004684	2.64	25.08
	TRUE	High	[K].HFSVEGQLEFR.[A]		0.0998375	0.0069094	3	5	1	P07900; P08238; Q58FF7	P07900 [328-338]; P08238 [320-330]; Q58FF7 [262-272]		0	1348.66	1.843	0.062817	0	70.3	129.7	50051.4	70846.5	2995	Shared	Light	High	Peak Found	High	-1.28	0.005326	0.07303	2.05	117.5
	TRUE	High	[K].HFSVEGQLEFR.[A]	1xLabel:13C(6)15N(4) [R11]	0.00589653	0.000965695	3	5	1	P07900; P08238; Q58FF7	P07900 [328-338]; P08238 [320-330]; Q58FF7 [262-272]		0	1358.67								2995	Redundant	Heavy	Peak Found	High	High	-1.54	0.0008827	0.004885	2.84	117.5
	TRUE	High	[K].HLEINPDHSIIETLR.[Q]	1xLabel:13C(6)15N(4) [R15]	0.00132516	0.000339819	1	1	1	P07900	P07900 [633-647]		0	1796.95	1.326	0.341976	0	86	114	3.15043e+06	3.20795e+06	3021		Heavy	Peak Found	High	High	1.1	0.0002891	0.001083	2.38	48.22
	TRUE	High	[K].HNDDEQYAWESSAGGSFTVR.[TA]		3.11862e-05	9.84928e-05	2	3	2	P07900; P08238	P07900 [154-173]; P08238 [149-168]		0	2255.96	1.121	0.752966	0	94.3	105.7	270348	232756	3029	Shared	Light	High	Peak Found	High	0.34	0.0001206	2.305e-05	4.56	117.5
	TRUE	High	[K].HNDDEQYAWESSAGGSFTVR.[TA]	1xLabel:13C(6)15N(4) [R20]	0.000106723	9.84928e-05	2	3	2	P07900; P08238	P07900 [154-173]; P08238 [149-168]		0	2265.97								3029	Redundant	Heavy	Peak Found	High	High	2.39	0.0001206	8.079e-05	3.97	117.5
	TRUE	High	[K].HSQFIGYPITLFVEK.[KE]		1.20852e-07	9.84928e-05	1	2	4	P07900	P07900 [210-224]		0	1778.95	1.197	0.500312	0	91	109	9.88002e+06	9.08338e+06	3051		Light	High	Peak Found	High	0.43	0.0001206	8.124e-08	3.85	68.45
	TRUE	High	[K].HSQFIGYPITLFVEK.[KE]	1xLabel:13C(6)15N(2) [K15]	4.36316e-08	9.84928e-05	1	2	4	P07900	P07900 [210-224]		0	1786.96								3051	Redundant	Heavy	Peak Found	High	High	0.51	0.0001206	2.882e-08	4.71	68.45
	TRUE	High	[K].KHLEINPDHSIIETLR.[Q]		1.19194e-06	9.84928e-05	1	1	5	P07900	P07900 [632-647]		1	1915.04	1.166	0.566486	0	92.3	107.7	24114921	2.1603e+07	3131		Light	High	Peak Found	High	0.17	0.0001206	8.314e-07	4.31	44.31
	TRUE	High	[K].KHLEINPDHSIIETLR.[Q]	1xLabel:13C(6)15N(2) [K1]; 1xLabel:13C(6)15N(4) [R16]	1.05861e-06	9.84928e-05	1	1	3	P07900	P07900 [632-647]		1	1933.06								3131	Redundant	Heavy	Peak Found	High	High	-0.03	0.0001206	7.385e-07	3.9	44.31
	TRUE	High	[K].KHSQFIGYPITLFVEK.[KE]		0.0252062	0.00211525	1	2	1	P07900	P07900 [209-224]		1	1907.04	1.063	0.896412	0	97	103	1716881	1.401e+06	3134		Light	High	Peak Found	High	1.14	0.001829	0.01904	2.77	65.61
	TRUE	High	[K].LGLGIDEDDPTADDTSAAVTEEMPPLEGDDDTSR.[M]		6.96463e-06	9.84928e-05	1	1	1	P07900	P07900 [694-727]		0	3547.54	0.906	0.60021	0	104.9	95.1	4.56865e+06	3.17848e+06	3726		Light	High	Peak Found	High	1.79	0.0001206	5.014e-06	6.28	66.25
	TRUE	High	[K].LGLGIDEDDPTADDTSAAVTEEMPPLEGDDDTSR.[M]	1xLabel:13C(6)15N(4) [R34]	2.12705e-06	9.84928e-05	1	1	1	P07900	P07900 [694-727]		0	3557.55								3726	Redundant	Heavy	Peak Found	High	High	1.46	0.0001206	1.499e-06	5.53	66.25
	TRUE	High	[K].LGLGIDEDDPTADDTSAAVTEEMPPLEGDDDTSR.[M]	1xOxidation [M23]	6.44925e-08	9.84928e-05	1	1	2	P07900	P07900 [694-727]		0	3563.53	0.596	0.0337946	0	125.3	74.7	4.19577e+06	1.92207e+06	3727		Light	High	Peak Found	High	-1.83	0.0001206	4.291e-08	5.2	58.25
	TRUE	High	[K].LGLGIDEDDPTADDTSAAVTEEMPPLEGDDDTSR.[M]	1xOxidation [M23]; 1xLabel:13C(6)15N(4) [R34]	1.2166e-09	9.84928e-05	1	1	1	P07900	P07900 [694-727]		0	3573.54								3727	Redundant	Heavy	Peak Found	High	High	0.2	0.0001206	7.59e-10	6.31	58.25
	TRUE	High	[R].NPDDITNEEYGEFYK.[S]		4.84535e-07	9.84928e-05	1	1	1	P07900	P07900 [300-314]		0	1833.78	0.966	0.757852	0	101.7	98.3	26313966	19528046	5684		Light	High	Peak Found	High	-0.01	0.0001206	3.33e-07	4.5	44.53
	TRUE	High	[R].NPDDITNEEYGEFYK.[S]	1xLabel:13C(6)15N(2) [K15]	2.62205e-07	9.84928e-05	1	1	2	P07900	P07900 [300-314]		0	1841.8								5684	Redundant	Heavy	Peak Found	High	High	-0.23	0.0001206	1.788e-07	4.8	44.53
	TRUE	High	[R].RAPFDLFENR.[K]		0.0029569	0.000632611	1	1	2	P07900	P07900 [346-355]		1	1264.64								6154	Redundant	Light	High	Peak Found	High	-0.04	0.0004992	0.002477	2.69	46.63
	TRUE	High	[R].RAPFDLFENR.[K]	2xLabel:13C(6)15N(4) [R1; R10]	0.00629423	0.000965695	1	1	2	P07900	P07900 [346-355]		1	1284.66	1.141	0.65381	0	93.4	106.6	1.24704e+07	1.09229e+07	6154		Heavy	Peak Found	High	High	0.76	0.0008827	0.005217	2.83	46.63
	TRUE	High	[R].RAPFDLFENRK.[K]		0.108095	0.00735611	1	1	1	P07900	P07900 [346-356]		2	1392.74	1.031	0.99857	0	98.5	101.5	2.29256e+06	1.81572e+06	6155		Light	High	Peak Found	High	0.03	0.005651	0.07928	2.1	36.13
	TRUE	High	[K].SLTNDWEDHLAVK.[H]		0.000208366	9.84928e-05	2	2	3	P07900; P08238	P07900 [315-327]; P08238 [307-319]		0	1527.74	1.287	0.301588	0	87.5	112.5	44694887	44170032	6575	Shared	Light	High	Peak Found	High	-0.72	0.0001206	0.0001598	3.6	42.34
	TRUE	High	[K].SLTNDWEDHLAVK.[H]	1xLabel:13C(6)15N(2) [K13]	7.13743e-05	9.84928e-05	2	2	2	P07900; P08238	P07900 [315-327]; P08238 [307-319]		0	1535.76								6575	Redundant	Heavy	Peak Found	High	High	-0.9	0.0001206	5.344e-05	3.88	42.34
	TRUE	High	[K].TKPIWTRNPDDITNEEYGEFYK.[S]		0.000519823	0.00021741	1	1	1	P07900	P07900 [293-314]		1	2716.29								7112	Redundant	Light	High	Peak Found	High	0.49	0.0002	0.0004084	4.43	51.31
	TRUE	High	[K].TKPIWTRNPDDITNEEYGEFYK.[S]	2xLabel:13C(6)15N(2) [K2; K22]; 1xLabel:13C(6)15N(4) [R7]	4.03525e-05	9.84928e-05	1	1	1	P07900	P07900 [293-314]		1	2742.33	1.42	0.276169	0	82.7	117.3	2139197	2332456	7112		Heavy	Peak Found	High	High	0.47	0.0001206	2.988e-05	3.45	51.31
	TRUE	High	[R].TLTIVDTGIGMTK.[A]		1.64306e-06	9.84928e-05	2	3	3	P07900; P08238	P07900 [88-100]; P08238 [83-95]		0	1349.73	2.051	0.00129814	0	65.5	134.5	30043999	47327648	7218	Shared	Light	High	Peak Found	High	0	0.0001206	1.152e-06	4.14	49.14
	TRUE	High	[R].TLTIVDTGIGMTK.[A]	1xLabel:13C(6)15N(2) [K13]	4.45639e-06	9.84928e-05	2	3	5	P07900; P08238	P07900 [88-100]; P08238 [83-95]		0	1357.75								7218	Redundant	Heavy	Peak Found	High	High	0.06	0.0001206	3.186e-06	3.56	49.14
	TRUE	High	[R].TLTIVDTGIGMTK.[A]	1xOxidation [M11]; 1xLabel:13C(6)15N(2) [K13]	3.3477e-06	9.84928e-05	2	3	6	P07900; P08238	P07900 [88-100]; P08238 [83-95]		0	1373.74								7219	Redundant	Heavy	Peak Found	High	High	0.08	0.0001206	2.389e-06	3.75	41.06
	TRUE	High	[R].TLTLVDTGIGMTKADLINNLGTIAK.[S]		2.11226e-06	9.84928e-05	2	2	2	P07900; P08238	P07900 [88-112]; P08238 [83-107]		1	2573.42	0.788	0.486504	0	111.9	88.1	551811	333894	7221	Shared	Light	High	Peak Found	High	0.37	0.0001206	1.489e-06	4.31	72.55
	TRUE	High	[R].TLTIVDTGIGMTKADLINNLGTIAK.[S]	1xOxidation [M11]	0.00105387	0.00021741	1	1	1	P07900	P07900 [88-112]		1	2589.42								7222	No Quan Values	Light	High	Not Found	High	-0.76	0.0002	0.0008558	3.01
	TRUE	High	[R].TLTIVDTGIGMTKADLINNLGTIAK.[S]	1xOxidation [M11]; 2xLabel:13C(6)15N(2) [K13; K25]	0.00032916	9.84928e-05	1	1	2	P07900	P07900 [88-112]		1	2605.45								7222	Redundant	Heavy	Not Found	High	High	0.33	0.0001206	0.0002562	3.36
	TRUE	High	[K].VILHLKEDQTEYLEER.[RW]		0.000408561	9.84928e-05	3	4	8	P07900; P08238; Q58FF7	P07900 [186-201]; P08238 [181-196]; Q58FF7 [160-175]		1	2015.04	1.19	0.513606	0	91.3	108.7	1.30684e+07	1.19466e+07	7888	Shared	Light	High	Peak Found	High	0.43	0.0001206	0.0003183	4.02	38.99
	TRUE	High	[K].VILHLKEDQTEYLEER.[RW]	1xLabel:13C(6)15N(2) [K6]; 1xLabel:13C(6)15N(4) [R16]	3.43807e-05	9.84928e-05	3	4	3	P07900; P08238; Q58FF7	P07900 [186-201]; P08238 [181-196]; Q58FF7 [160-175]		1	2033.07								7888	Redundant	Heavy	Peak Found	High	High	-0.41	0.0001206	2.538e-05	4.85	117.69
	TRUE	High	[K].VILHLKEDQTEYLEERR.[IV]		0.0241723	0.00211525	3	3	2	P07900; P08238; Q58FF7	P07900 [186-202]; P08238 [181-197]; Q58FF7 [160-176]		2	2171.15	1.293	0.439401	0	87.2	112.8	370008	367388	7889	Shared	Light	High	Peak Found	High	-0.02	0.001829	0.01832	3.09	118.12
	TRUE	High	[K].VILHLKEDQTEYLEERR.[IV]	1xLabel:13C(6)15N(2) [K6]; 2xLabel:13C(6)15N(4) [R16; R17]	0.000257632	9.84928e-05	3	3	1	P07900; P08238; Q58FF7	P07900 [186-202]; P08238 [181-197]; Q58FF7 [160-176]		2	2199.18								7889	Redundant	Heavy	Peak Found	High	High	-0.22	0.0001206	0.0001988	3.53	118.12
	TRUE	High	[R].YESLTDPSKLDSGK.[E]		0.00111061	0.000339819	4	4	2	P07900; P08238; Q58FF8; Q58FF7	P07900 [61-74]; P08238 [56-69]; Q58FF8 [56-69]; Q58FF7 [56-69]		1	1539.75	1.229	0.414534	0	89.7	110.3	49924831	47103470	8372	Shared	Light	High	Peak Found	High	-0.03	0.0002891	0.0009004	3.61	24.55
	TRUE	High	[R].YESLTDPSKLDSGK.[E]	2xLabel:13C(6)15N(2) [K9; K14]	0.00253753	0.000534724	4	4	3	P07900; P08238; Q58FF8; Q58FF7	P07900 [61-74]; P08238 [56-69]; Q58FF8 [56-69]; Q58FF7 [56-69]		1	1555.78								8372	Redundant	Heavy	Peak Found	High	High	0.24	0.0004281	0.00212	3.51	24.55
	TRUE	High	[R].YYTSASGDEMVSLK.[D]		0.00013225	9.84928e-05	1	1	1	P07900	P07900 [465-478]		0	1550.7	1.664	0.0587866	0	75.1	124.9	4.68894e+06	5.99321e+06	8578		Light	High	Peak Found	High	-0.24	0.0001206	0.0001006	3.51	35.8
	TRUE	High	[R].YYTSASGDEMVSLK.[D]	1xLabel:13C(6)15N(2) [K14]	0.000526793	0.00021741	1	1	1	P07900	P07900 [465-478]		0	1558.72								8578	Redundant	Heavy	Peak Found	High	High	0.52	0.0002	0.0004146	2.94	35.8
	TRUE	High	[R].YYTSASGDEMVSLK.[D]	1xOxidation [M10]	2.99095e-05	9.84928e-05	1	1	1	P07900	P07900 [465-478]		0	1566.7								8577	No Quan Values	Light	High	Not Found	High	0.9	0.0001206	2.206e-05	3.8
	TRUE	High	[R].YYTSASGDEMVSLK.[D]	1xOxidation [M10]; 1xLabel:13C(6)15N(2) [K14]	0.000177904	9.84928e-05	1	1	2	P07900	P07900 [465-478]		0	1574.71								8577	Redundant	Heavy	Not Found	High	High	0.1	0.0001206	0.0001361	2.92
TRUE	High	Master Protein	P29966	Myristoylated alanine-rich C-kinase substrate OS=Homo sapiens OX=9606 GN=MARCKS PE=1 SV=4	0	228.667	44	10	68	10	332	31.5	4.45	343.64	10	Pf02063	4082	ENSG00000277443	MARCKS	E1P560; hsa:4082; P29966; Q2LA83; Q5TDB7	Brain-derived neurotrophic factor (BDNF) signaling pathway	Acetylcholine regulates insulin secretion	Fc gamma R-mediated phagocytosis; MicroRNAs in cancer	4	0	0.696	0.153793	22.14	119.9	80.1	3.56483e+08	1.82932e+08	High	High	1
	Checked	Confidence	Annotated Sequence	Modifications	Qvality PEP	Qvality q-value	# Protein Groups	# Proteins	# PSMs	Master Protein Accessions	Positions in Master Proteins	Modifications in Master Proteins	# Missed Cleavages	Theo. MH+ [Da]	Abundance Ratio: (Heavy) / (Light)	Abundance Ratio P-Value: (Heavy) / (Light)	Abundance Ratio Variability [%]: (Heavy) / (Light)	Abundances (Grouped): Light	Abundances (Grouped): Heavy	Abundance: F1: Light, Sample	Abundance: F1: Heavy, Sample	Precursor Quan Result ID	Quan Info	Quan Channel	Found in Sample: [S1] F1: Light, Sample	Found in Sample: [S3] F1: Heavy, Sample	Confidence (by Search Engine): Sequest HT	DeltaM [ppm] (by Search Engine): Sequest HT	Percolator q-Value (by Search Engine): Sequest HT	Percolator PEP (by Search Engine): Sequest HT	XCorr (by Search Engine): Sequest HT	Top Apex RT [min]
	TRUE	High	[K].ANGQENGHVKVNGDASPAAAESGAK.[E]	1xDeamidated [N12]; 2xLabel:13C(6)15N(2) [K10; K25]	0.00763087	0.000965695	1	1	1	P29966	P29966 [31-55]		1	2396.14								508	No Quan Values	Heavy	Not Found	High	High	2.17	0.0008827	0.00624	3.2
	TRUE	High	[K].EAGEGGEAEAPAAEGGK.[D]	1xLabel:13C(6)15N(2) [K17]	0.000460976	0.00021741	1	1	1	P29966	P29966 [177-193]		0	1537.69								1462	No Quan Values	Heavy	Not Found	High	High	-0.37	0.0002	0.0003606	2.67
	TRUE	High	[K].EAPAEGEAAEPGSPTAAEGEAASAASSTSSPK.[A]		6.58569e-08	9.84928e-05	1	1	4	P29966	P29966 [106-137]		0	2915.3	0.626	0.0191862	0	123	77	104019136	50002059	1491		Light	High	Peak Found	High	1.49	0.0001206	4.404e-08	5.67	32.57
	TRUE	High	[K].EAPAEGEAAEPGSPTAAEGEAASAASSTSSPK.[A]	1xLabel:13C(6)15N(2) [K32]	2.6589e-07	9.84928e-05	1	1	4	P29966	P29966 [106-137]		0	2923.32								1491	Redundant	Heavy	Peak Found	High	High	0.8	0.0001206	1.813e-07	5.65	32.57
	TRUE	High	[K].EELQANGSAPAADKEEPAAAGSGAASPSAAEK.[G]		5.37749e-10	9.84928e-05	1	1	6	P29966	P29966 [56-87]		1	2982.39	0.676	0.0471922	0	119.4	80.6	1.41064e+08	73186441	1619		Light	High	Peak Found	High	0.03	0.0001206	3.318e-10	7.05	21.44
	TRUE	High	[K].EELQANGSAPAADKEEPAAAGSGAASPSAAEK.[G]	2xLabel:13C(6)15N(2) [K14; K32]	1.01506e-07	9.84928e-05	1	1	4	P29966	P29966 [56-87]		1	2998.42								1619	Redundant	Heavy	Peak Found	High	High	1	0.0001206	6.802e-08	6.46	21.44
	TRUE	High	[K].EELQANGSAPAADKEEPAAAGSGAASPSAAEK.[G]	1xDeamidated [N6]; 2xLabel:13C(6)15N(2) [K14; K32]	4.58085e-09	9.84928e-05	1	1	5	P29966	P29966 [56-87]		1	2999.4								1621	Redundant	Heavy	Peak Found	High	High	0.67	0.0001206	2.922e-09	8.22	22.79
	TRUE	High	[K].EELQANGSAPAADKEEPAAAGSGAASPSAAEKGEPAAAAAPEAGASPVEK.[E]		1.05109e-05	9.84928e-05	1	1	1	P29966	P29966 [56-105]		2	4586.18								1622	No Quan Values	Light	High	Not Found	High	0.07	0.0001206	7.615e-06	6.24
	TRUE	High	[K].EELQANGSAPAADKEEPAAAGSGAASPSAAEKGEPAAAAAPEAGASPVEK.[E]	1xDeamidated [Q4]	3.34741e-07	9.84928e-05	1	1	1	P29966	P29966 [56-105]		2	4587.16	0.443	0.00629122	0	138.6	61.4	2.0034e+06	681851	1623		Light	High	Peak Found	High	3.87	0.0001206	2.297e-07	7.49	30.3
	TRUE	High	[K].EEPAAAGSGAASPSAAEKGEPAAAAAPEAGASPVEK.[E]		7.84086e-08	9.84928e-05	1	1	1	P29966	P29966 [70-105]		1	3204.53	0.465	0.00704033	0	136.5	63.5	3.4393e+06	1.22824e+06	1643		Light	High	Peak Found	High	-1	0.0001206	5.235e-08	6.33	26.85
	TRUE	High	[K].EEPAAAGSGAASPSAAEKGEPAAAAAPEAGASPVEK.[E]	2xLabel:13C(6)15N(2) [K18; K36]	1.08085e-07	9.84928e-05	1	1	1	P29966	P29966 [70-105]		1	3220.56								1643	Redundant	Heavy	Peak Found	High	High	1.94	0.0001206	7.264e-08	6.19	26.85
	TRUE	High	[K].GEAAAERPGEAAVASSPSKANGQENGHVK.[V]		0.0139742	0.00137984	1	1	1	P29966	P29966 [12-40]		1	2819.37	0.696	0.239833	0	117.9	82.1	394381	210889	2474		Light	High	Peak Found	High	0.07	0.001311	0.01098	3.39	12.57
	TRUE	High	[K].GEAAAERPGEAAVASSPSKANGQENGHVK.[V]	1xDeamidated [N21]	7.9209e-05	9.84928e-05	1	1	2	P29966	P29966 [12-40]		1	2820.35								2475	Redundant	Light	High	Peak Found	High	-0.49	0.0001206	5.938e-05	4.35	12.85
	TRUE	High	[K].GEAAAERPGEAAVASSPSKANGQENGHVK.[V]	2xLabel:13C(6)15N(2) [K19; K29]; 1xLabel:13C(6)15N(4) [R7]	0.00139626	0.000424254	1	1	2	P29966	P29966 [12-40]		1	2845.4								2474	Redundant	Heavy	Peak Found	High	High	0.21	0.0003475	0.001144	3.45	12.57
	TRUE	High	[K].GEAAAERPGEAAVASSPSKANGQENGHVK.[V]	1xDeamidated [Q23]; 2xLabel:13C(6)15N(2) [K19; K29]; 1xLabel:13C(6)15N(4) [R7]	0.0145571	0.00146171	1	1	1	P29966	P29966 [12-40]		1	2846.39	1.223	0.519951	0	90	110	626980	589014	2475		Heavy	Peak Found	High	High	1.55	0.001368	0.01146	3.25	12.83
	TRUE	High	[K].GEAAAERPGEAAVASSPSKANGQENGHVKVNGDASPAAAESGAK.[E]		4.23676e-05	9.84928e-05	1	1	2	P29966	P29966 [12-55]		2	4144.99								2477	Redundant	Light	High	Peak Found	High	-1.26	0.0001206	3.142e-05	5.04	17.96
	TRUE	High	[K].GEAAAERPGEAAVASSPSKANGQENGHVKVNGDASPAAAESGAK.[E]	1xDeamidated [N/Q]	3.05741e-06	9.84928e-05	1	1	4	P29966	P29966 [12-55]		2	4145.97	0.856	0.576105	0	107.7	92.3	1.63952e+06	1.07804e+06	2479		Light	High	Peak Found	High	4.31	0.0001206	2.171e-06	5.94	19.16
	TRUE	High	[K].GEAAAERPGEAAVASSPSKANGQENGHVKVNGDASPAAAESGAK.[E]	3xLabel:13C(6)15N(2) [K19; K29; K44]; 1xLabel:13C(6)15N(4) [R7]	2.6384e-05	9.84928e-05	1	1	1	P29966	P29966 [12-55]		2	4179.04	0.819	0.359651	0	110	90	6.01677e+06	3782221	2477		Heavy	Peak Found	High	High	-0.36	0.0001206	1.945e-05	5.11	17.96
	TRUE	High	[K].GEPAAAAAPEAGASPVEK.[E]		6.1418e-08	9.84928e-05	1	1	4	P29966	P29966 [88-105]		0	1622.8	0.657	0.0343599	0	120.7	79.3	81554977	4.11425e+07	2501		Light	High	Peak Found	High	-0.43	0.0001206	4.098e-08	4.38	19.79
	TRUE	High	[K].GEPAAAAAPEAGASPVEK.[E]	1xLabel:13C(6)15N(2) [K18]	1.57524e-08	9.84928e-05	1	1	3	P29966	P29966 [88-105]		0	1630.82								2501	Redundant	Heavy	Peak Found	High	High	0.22	0.0001206	1.03e-08	5	19.79
	TRUE	High	[K].TAAKGEAAAERPGEAAVASSPSKANGQENGHVK.[V]		5.93121e-08	9.84928e-05	1	1	2	P29966	P29966 [8-40]		2	3190.58	0.798	0.206831	0	111.2	88.8	11185459	6.85617e+06	6919		Light	High	Peak Found	High	-0.09	0.0001206	3.958e-08	5.67	12.5
	TRUE	High	[K].TAAKGEAAAERPGEAAVASSPSKANGQENGHVK.[V]	1xDeamidated [N]	3.87015e-05	9.84928e-05	1	1	2	P29966	P29966 [8-40]		2	3191.57								6920	No Quan Values	Light	High	Not Found	High	0.89	0.0001206	2.875e-05	4.55
	TRUE	High	[K].TAAKGEAAAERPGEAAVASSPSKANGQENGHVK.[V]	1xLabel:13C(6)15N(2) [K4]; 1xLabel:13C(6)15N(4) [R11]	0.00823084	0.00104825	1	1	2	P29966	P29966 [8-40]		2	3208.61									Inconsistently Labeled		Not Found	Not Found	High	2.3	0.0009506	0.006721	2.32	12.73
	TRUE	High	[K].TAAKGEAAAERPGEAAVASSPSKANGQENGHVK.[V]	3xLabel:13C(6)15N(2) [K4; K23; K33]; 1xLabel:13C(6)15N(4) [R11]	1.42905e-06	9.84928e-05	1	1	3	P29966	P29966 [8-40]		2	3224.63								6919	Redundant	Heavy	Peak Found	High	High	-1.01	0.0001206	1.002e-06	5.38	12.5
TRUE	High	Master Protein	P21333	Filamin-A OS=Homo sapiens OX=9606 GN=FLNA PE=1 SV=4	0	228.063	21	32	65	31	2647	280.6	6.06	226.96	32	Pf00307, Pf00630	2316	ENSG00000196924	FLNA	E9KL45; hsa:2316; P21333; Q5HY53; Q5HY55; Q8NF52	Androgen receptor signaling pathway; Prolactin signaling pathway; Focal adhesion; Hypothesized pathways in pathogenesis of cardiovascular disease; MAPK signaling pathway; IL-4 signaling pathway; Ebola virus pathway in host; Joubert syndrome	RHO GTPases activate PAKs; Platelet degranulation ; GP1b-IX-V activation signalling; OAS antiviral response; Cell-extracellular matrix interactions	MAPK signaling pathway; Focal adhesion; Salmonella infection; Proteoglycans in cancer	17	1	0.705	0.168429	23.26	114.8	85.2	1.48708e+08	8.48154e+07	High	High	1
	Checked	Confidence	Annotated Sequence	Modifications	Qvality PEP	Qvality q-value	# Protein Groups	# Proteins	# PSMs	Master Protein Accessions	Positions in Master Proteins	Modifications in Master Proteins	# Missed Cleavages	Theo. MH+ [Da]	Abundance Ratio: (Heavy) / (Light)	Abundance Ratio P-Value: (Heavy) / (Light)	Abundance Ratio Variability [%]: (Heavy) / (Light)	Abundances (Grouped): Light	Abundances (Grouped): Heavy	Abundance: F1: Light, Sample	Abundance: F1: Heavy, Sample	Precursor Quan Result ID	Quan Info	Quan Channel	Found in Sample: [S1] F1: Light, Sample	Found in Sample: [S3] F1: Heavy, Sample	Confidence (by Search Engine): Sequest HT	DeltaM [ppm] (by Search Engine): Sequest HT	Percolator q-Value (by Search Engine): Sequest HT	Percolator PEP (by Search Engine): Sequest HT	XCorr (by Search Engine): Sequest HT	Top Apex RT [min]
	TRUE	High	[R].AEAGVPAEFSIWTR.[E]		0.0281041	0.00254153	1	1	1	P21333	P21333 [2251-2264]		0	1533.77	0.665	0.110899	0	120.1	79.9	3.95127e+06	2.01934e+06	134		Light	High	Peak Found	High	-2.42	0.002134	0.02112	2.26	61.12
	TRUE	High	[K].AFGPGLQGGSAGSPAR.[F]		3.8433e-05	9.84928e-05	1	1	2	P21333	P21333 [1072-1087]		0	1429.72	0.707	0.0938421	0	117.2	82.8	10163430	5.51985e+06	204		Light	High	Peak Found	High	0.38	0.0001206	2.855e-05	3.54	24.67
	TRUE	High	[K].AFGPGLQGGSAGSPAR.[F]	1xLabel:13C(6)15N(4) [R16]	1.99646e-05	9.84928e-05	1	1	2	P21333	P21333 [1072-1087]		0	1439.73								204	Redundant	Heavy	Peak Found	High	High	2.01	0.0001206	1.467e-05	3.65	24.67
	TRUE	High	[R].ANLPQSFQVDTSK.[A]		5.23207e-06	9.84928e-05	1	1	1	P21333	P21333 [1465-1477]		0	1434.72	0.873	0.432712	0	106.8	93.2	20938360	14036101	515		Light	High	Peak Found	High	0.21	0.0001206	3.744e-06	3.48	32.64
	TRUE	High	[R].ANLPQSFQVDTSK.[A]	1xLabel:13C(6)15N(2) [K13]	5.71426e-05	9.84928e-05	1	1	1	P21333	P21333 [1465-1477]		0	1442.74								515	Redundant	Heavy	Peak Found	High	High	0.78	0.0001206	4.271e-05	3.39	32.64
	TRUE	High	[K].ASGPGLNTTGVPASLPVEFTIDAK.[D]		3.4621e-05	9.84928e-05	1	1	2	P21333	P21333 [1550-1573]		0	2342.22								673	Redundant	Light	High	Not Found	High	-1.13	0.0001206	2.555e-05	3.5
	TRUE	High	[K].ASGPGLNTTGVPASLPVEFTIDAK.[D]	1xLabel:13C(6)15N(2) [K24]	0.00201428	0.000424254	1	1	1	P21333	P21333 [1550-1573]		0	2350.24								673	No Quan Values	Heavy	Not Found	High	High	-1.19	0.0003475	0.001667	4.34
	TRUE	High	[R].AYGPGIEPTGNMVK.[K]		0.00150027	0.000424254	1	1	1	P21333	P21333 [286-299]		0	1433.71	0.83	0.351159	0	109.3	90.7	5.52462e+06	3.52234e+06	838		Light	High	Peak Found	High	1.86	0.0003475	0.001234	2.9	32.22
	TRUE	High	[R].AYGPGIEPTGNMVK.[K]	1xOxidation [M12]	0.00662522	0.000965695	1	1	1	P21333	P21333 [286-299]		0	1449.7								839	No Quan Values	Light	High	Not Found	High	0.63	0.0008827	0.005465	2.29
	TRUE	High	[K].DAGEGGLSLAIEGPSK.[A]	1xLabel:13C(6)15N(2) [K16]	0.000299308	9.84928e-05	1	1	1	P21333	P21333 [1892-1907]		0	1508.77	0.496	0.00774308	0	133.7	66.3	3.77822e+06	1.43962e+06	864		Heavy	Peak Found	High	High	2.59	0.0001206	0.0002326	3.31	45.17
	TRUE	High	[R].DVDIIDHHDNTYTVK.[Y]		0.0140887	0.00137984	1	1	1	P21333	P21333 [922-936]		0	1784.84	0.94	0.73419	0	103.1	96.9	6371107	4597267	1369		Light	High	Peak Found	High	-0.49	0.001311	0.01111	2.44	28.59
	TRUE	High	[R].EAGAGGLAIAVEGPSK.[A]		2.37828e-06	9.84928e-05	1	1	1	P21333	P21333 [2265-2280]		0	1426.75								1461	Redundant	Light	High	Peak Found	High	-1.18	0.0001206	1.684e-06	4.09	35.68
	TRUE	High	[R].EAGAGGLAIAVEGPSK.[A]	1xLabel:13C(6)15N(2) [K16]	3.21045e-06	9.84928e-05	1	1	1	P21333	P21333 [2265-2280]		0	1434.77	100	1e-17			200		1995294	1461		Heavy	Not Found	High	High	-0.35	0.0001206	2.278e-06	3.58	35.68
	TRUE	High	[R].EEGPYEVEVTYDGVPVPGSPFPLEAVAPTKPSK.[V]		0.00114009	0.000339819	1	1	1	P21333	P21333 [1037-1069]		0	3485.74								1595	No Quan Values	Light	High	Not Found	High	-4.04	0.0002891	0.0009243	4.03
	TRUE	High	[R].EGPYSISVLYGDEEVPR.[S]		7.03896e-05	9.84928e-05	1	1	2	P21333	P21333 [1516-1532]		0	1909.92	0.703	0.176594	0	117.4	82.6	3845032	2.07561e+06	1708		Light	High	Peak Found	High	-2.66	0.0001206	5.283e-05	3.5	58.26
	TRUE	High	[R].EGPYSISVLYGDEEVPR.[S]	1xLabel:13C(6)15N(4) [R17]	3.05412e-05	9.84928e-05	1	1	1	P21333	P21333 [1516-1532]		0	1919.93								1708	Redundant	Heavy	Peak Found	High	High	-0.01	0.0001206	2.261e-05	4.25	58.26
	TRUE	High	[R].FGGEHVPNSPFQVTALAGDQPSVQPPLR.[S]		0.0197755	0.0017975	1	1	1	P21333	P21333 [1726-1753]		0	2945.49								2215	No Quan Values	Light	High	Not Found	High	-3.83	0.001605	0.01521	2.91
	TRUE	High	[K].FNEEHIPDSPFVVPVASPSGDAR.[R]		0.00324764	0.00071665	1	1	1	P21333	P21333 [2311-2333]		0	2467.19	0.589	0.049078	0	125.9	74.1	3.92568e+06	1.77462e+06	2286		Light	High	Peak Found	High	1.13	0.0005779	0.002712	4	57.07
	TRUE	High	[R].GAGTGGLGLAVEGPSEAK.[M]		1.86295e-06	9.84928e-05	1	1	2	P21333	P21333 [1382-1399]		0	1570.81	0.726	0.153044	0	115.8	84.2	7760327	4329706	2410		Light	High	Peak Found	High	0.05	0.0001206	1.314e-06	4.44	34.55
	TRUE	High	[K].GLVEPVDVVDNADGTQTVNYVPSR.[E]		8.00673e-08	9.84928e-05	1	1	2	P21333	P21333 [1492-1515]		0	2544.26	0.683	0.0855447	0	118.8	81.2	9.02723e+06	4.73516e+06	2716		Light	High	Peak Found	High	-2.42	0.0001206	5.361e-08	5.46	55.76
	TRUE	High	[K].GLVEPVDVVDNADGTQTVNYVPSR.[E]	1xLabel:13C(6)15N(4) [R24]	6.14274e-06	9.84928e-05	1	1	2	P21333	P21333 [1492-1515]		0	2554.27								2716	Redundant	Heavy	Peak Found	High	High	-0.29	0.0001206	4.406e-06	5.36	55.76
	TRUE	High	[R].LIALLEVLSQK.[KR]		0.000349849	9.84928e-05	3	3	1	P21333; O75369; Q14315	P21333 [77-87]; O75369 [50-60]; Q14315 [70-80]		0	1226.77	1.135	0.72189	0	93.7	106.3	270587	235921	3888	Shared	Light	High	Peak Found	High	-0.33	0.0001206	0.0002716	2.48	74.54
	TRUE	High	[R].NGHVGISFVPK.[E]		0.000408561	9.84928e-05	1	1	1	P21333	P21333 [2004-2014]		0	1154.63	0.842	0.572278	0	108.6	91.4	1.10886e+06	717329	5546		Light	High	Peak Found	High	0.56	0.0001206	0.0003187	2.51	25.1
	TRUE	High	[K].NGQHVASSPIPVVISQSEIGDASR.[V]		5.72879e-06	9.84928e-05	1	1	1	P21333	P21333 [2026-2049]		0	2448.25								5555	No Quan Values	Light	High	Not Found	High	-0.26	0.0001206	4.102e-06	4.47
	TRUE	High	[R].SAGQGEVLVYVEDPAGHQEEAK.[V]	1xLabel:13C(6)15N(2) [K22]	0.000275825	9.84928e-05	1	1	1	P21333	P21333 [310-331]		0	2321.11								6256	No Quan Values	Heavy	Not Found	High	High	-0.32	0.0001206	0.0002134	3
	TRUE	High	[K].SPFEVYVDK.[S]		0.0854556	0.0061531	1	1	1	P21333	P21333 [368-376]		0	1083.54	0.595	0.0747495	0	125.4	74.6	2467957	1127569	6653		Light	High	Peak Found	High	-0.35	0.004782	0.06237	1.86	36.55
	TRUE	High	[K].SPFSVAVSPSLDLSK.[I]		0.000428227	0.00021741	1	1	1	P21333	P21333 [959-973]		0	1533.82	0.757	0.19907	0	113.9	86.1	5.1261e+06	2.97834e+06	6654		Light	High	Peak Found	High	-0.34	0.0002	0.0003362	3.24	56.23
	TRUE	High	[K].SPFSVAVSPSLDLSK.[I]	1xLabel:13C(6)15N(2) [K15]	0.0010608	0.00021741	1	1	1	P21333	P21333 [959-973]		0	1541.83								6654	Redundant	Heavy	Peak Found	High	High	-0.91	0.0002	0.0008575	2.87	56.23
	TRUE	High	[K].TGVAVNKPAEFTVDAK.[H]		0.00606957	0.000965695	1	1	2	P21333	P21333 [685-700]		0	1646.87								7095	Redundant	Light	High	Peak Found	High	0.99	0.0008827	0.005013	2.65	27.43
	TRUE	High	[K].TGVAVNKPAEFTVDAK.[H]	2xLabel:13C(6)15N(2) [K7; K16]	0.00483256	0.000910608	1	1	1	P21333	P21333 [685-700]		0	1662.9	0.585	0.00792458	0	126.2	73.8	12196616	5.47858e+06	7095		Heavy	Peak Found	High	High	0.82	0.0008524	0.004022	3.31	27.43
	TRUE	High	[R].TGVELGKPTHFTVNAK.[A]	2xLabel:13C(6)15N(2) [K7; K16]	4.29615e-05	9.84928e-05	1	1	1	P21333	P21333 [885-900]		0	1714.95	0.878	0.540984	0	106.5	93.5	3.86419e+06	2606308	7096		Heavy	Peak Found	High	High	1.33	0.0001206	3.191e-05	2.51	24.47
	TRUE	High	[R].VANPSGNLTETYVQDR.[G]		2.36175e-06	9.84928e-05	1	1	1	P21333	P21333 [1297-1312]		0	1763.86								7551	Redundant	Light	High	Peak Found	High	-2.23	0.0001206	1.672e-06	4	32.11
	TRUE	High	[R].VANPSGNLTETYVQDR.[G]	1xLabel:13C(6)15N(4) [R16]	4.2142e-07	9.84928e-05	1	1	1	P21333	P21333 [1297-1312]		0	1773.86	0.844	0.397125	0	108.5	91.5	8114985	5259045	7551		Heavy	Peak Found	High	High	2.07	0.0001206	2.902e-07	3.61	32.11
	TRUE	High	[K].VEPGLGADNSVVR.[F]	1xLabel:13C(6)15N(4) [R13]	0.0366887	0.00310836	1	1	1	P21333	P21333 [1020-1032]		0	1322.69	0.788	0.305104	0	111.9	88.1	6691673	4.04926e+06	7663		Heavy	Peak Found	High	High	0.17	0.002538	0.02722	1.96	25.87
	TRUE	High	[K].VGSAADIPINISETDLSLLTATVVPPSGR.[E]		8.70654e-06	9.84928e-05	1	1	1	P21333	P21333 [1965-1993]		0	2893.55	0.569	0.0852312	0	127.5	72.5	1.00024e+06	436896	7766		Light	High	Peak Found	High	1.92	0.0001206	6.295e-06	4.81	86.69
	TRUE	High	[R].VHGPGIQSGTTNKPNKFTVETR.[G]	2xLabel:13C(6)15N(2) [K13; K16]; 1xLabel:13C(6)15N(4) [R22]	0.00311946	0.000632611	1	1	1	P21333	P21333 [1360-1381]		1	2394.27	0.708	0.120064	0	117.1	82.9	4809748	2.61431e+06	7781		Heavy	Peak Found	High	High	-0.02	0.0004992	0.002602	3.4	18.15
	TRUE	High	[K].VKAFGPGLQGGSAGSPAR.[F]		0.00602577	0.000965695	1	1	1	P21333	P21333 [1070-1087]		1	1656.88								7786	No Quan Values	Light	High	Not Found	High	-0.19	0.0008827	0.004986	3.06
	TRUE	High	[K].VTAQGPGLEPSGNIANK.[T]		0.000220118	9.84928e-05	1	1	1	P21333	P21333 [384-400]		0	1652.86								8136	Redundant	Light	High	Peak Found	High	-0.94	0.0001206	0.0001693	4.86	24.68
	TRUE	High	[K].VTAQGPGLEPSGNIANK.[T]	1xLabel:13C(6)15N(2) [K17]	4.20737e-05	9.84928e-05	1	1	1	P21333	P21333 [384-400]		0	1660.87	0.664	0.057705	0	120.2	79.8	9935708	5070355	8136		Heavy	Peak Found	High	High	-0.15	0.0001206	3.127e-05	4.54	24.68
	TRUE	High	[K].YGGDEIPFSPYR.[V]	1xLabel:13C(6)15N(4) [R12]	0.0132009	0.00137984	1	1	1	P21333	P21333 [1622-1633]		0	1410.66	0.67	0.0901746	0	119.8	80.2	4.41526e+06	2272237	8397		Heavy	Peak Found	High	High	-1.29	0.001311	0.01047	2.66	48.38
	TRUE	High	[K].YGGPYHIGGSPFK.[A]		0.0887182	0.00630348	1	1	2	P21333	P21333 [2501-2513]		0	1379.67	0.828	0.471521	0	109.4	90.6	2407234	1.53061e+06	8400		Light	High	Peak Found	High	0.2	0.004889	0.06491	2.36	33.76
	TRUE	High	[K].YNEQHVPGSPFTAR.[V]		0.00231311	0.000424254	1	1	1	P21333	P21333 [1938-1951]		0	1602.77	0.654	0.0785818	0	120.9	79.1	4072317	2045042	8484		Light	High	Peak Found	High	-0.33	0.0003475	0.001923	2.45	25.81
	TRUE	High	[K].YNEQHVPGSPFTAR.[V]	1xLabel:13C(6)15N(4) [R14]	0.00537231	0.000965695	1	1	1	P21333	P21333 [1938-1951]		0	1612.77								8484	Redundant	Heavy	Peak Found	High	High	1.55	0.0008827	0.004466	2.89	25.81
	TRUE	High	[K].YTPVQQGPVGVNVTYGGDPIPK.[S]		6.49532e-06	9.84928e-05	1	1	1	P21333	P21333 [937-958]		0	2286.18	0.374	0.000323703	0	145.5	54.5	4.49348e+06	1.29198e+06	8545		Light	High	Peak Found	High	-0.77	0.0001206	4.691e-06	4.37	50.35
	TRUE	High	[K].YTPVQQGPVGVNVTYGGDPIPK.[S]	1xLabel:13C(6)15N(2) [K22]	3.14395e-06	9.84928e-05	1	1	1	P21333	P21333 [937-958]		0	2294.19								8545	Redundant	Heavy	Peak Found	High	High	2.09	0.0001206	2.241e-06	4.4	50.35
TRUE	High	Master Protein	P05023	Sodium/potassium-transporting ATPase subunit alpha-1 OS=Homo sapiens OX=9606 GN=ATP1A1 PE=1 SV=1	0	227.792	26	22	70	21	1023	112.8	5.49	233.8	22	Pf00122, Pf00689, Pf00690, Pf13246	476	ENSG00000163399	ATP1A1	B2RBR6; B7Z2T5; B7Z3U6; F5H3A1; hsa:476; P05023; Q16689; Q6LDM4; Q9UCN1; Q9UJ20; Q9UJ21	Pre-implantation embryo; Proximal tubule transport	Ion transport by P-type ATPases; Potential therapeutics for SARS; Ion homeostasis	cGMP-PKG signaling pathway; cAMP signaling pathway; Cardiac muscle contraction; Adrenergic signaling in cardiomyocytes; Insulin secretion; Thyroid hormone synthesis; Thyroid hormone signaling pathway; Aldosterone synthesis and secretion; Aldosterone-regulated sodium reabsorption; Endocrine and other factor-regulated calcium reabsorption; Proximal tubule bicarbonate reclamation; Salivary secretion…	23	1	1.505	0.110689	10.87	84.3	115.7	2.53453e+08	2.67207e+08	High	High	1
	Checked	Confidence	Annotated Sequence	Modifications	Qvality PEP	Qvality q-value	# Protein Groups	# Proteins	# PSMs	Master Protein Accessions	Positions in Master Proteins	Modifications in Master Proteins	# Missed Cleavages	Theo. MH+ [Da]	Abundance Ratio: (Heavy) / (Light)	Abundance Ratio P-Value: (Heavy) / (Light)	Abundance Ratio Variability [%]: (Heavy) / (Light)	Abundances (Grouped): Light	Abundances (Grouped): Heavy	Abundance: F1: Light, Sample	Abundance: F1: Heavy, Sample	Precursor Quan Result ID	Quan Info	Quan Channel	Found in Sample: [S1] F1: Light, Sample	Found in Sample: [S3] F1: Heavy, Sample	Confidence (by Search Engine): Sequest HT	DeltaM [ppm] (by Search Engine): Sequest HT	Percolator q-Value (by Search Engine): Sequest HT	Percolator PEP (by Search Engine): Sequest HT	XCorr (by Search Engine): Sequest HT	Top Apex RT [min]
	TRUE	High	[K].ADIGVAMGIAGSDVSK.[Q]		3.22916e-05	9.84928e-05	1	2	1	P05023	P05023 [728-743]		0	1490.75	2.479	0.000442896	0	57.5	142.5	2.42781e+06	4.62124e+06	118		Light	High	Peak Found	High	-1.2	0.0001206	2.386e-05	3.4	44.2
	TRUE	High	[K].ADIGVAMGIAGSDVSK.[Q]	1xOxidation [M7]	0.000272089	9.84928e-05	1	2	1	P05023	P05023 [728-743]		0	1506.75	1.105	0.76107	0	95	105	3.97861e+06	3374887	117		Light	High	Peak Found	High	2.17	0.0001206	0.0002102	3.47	31.8
	TRUE	High	[K].ADIGVAMGIAGSDVSK.[Q]	1xOxidation [M7]; 1xLabel:13C(6)15N(2) [K16]	1.78573e-05	9.84928e-05	1	2	1	P05023	P05023 [728-743]		0	1514.76								117	Redundant	Heavy	Peak Found	High	High	0.53	0.0001206	1.307e-05	4.01	31.8
	TRUE	High	[R].AVAGDASESALLK.[C]		7.86611e-05	9.84928e-05	1	1	2	P05023	P05023 [446-458]		0	1231.65								764	Redundant	Light	High	Peak Found	High	-0.29	0.0001206	5.906e-05	2.88	26.13
	TRUE	High	[R].AVAGDASESALLK.[C]	1xLabel:13C(6)15N(2) [K13]	4.35638e-05	9.84928e-05	1	1	2	P05023	P05023 [446-458]		0	1239.67	1.611	0.0370941	0	76.6	123.4	21843926	27023146	764		Heavy	Peak Found	High	High	0.87	0.0001206	3.249e-05	2.88	26.13
	TRUE	High	[R].AVFQANQENLPILK.[R]		0.000519823	0.00021741	1	1	2	P05023	P05023 [431-444]		0	1584.87	1.419	0.138756	0	82.7	117.3	8842382	9633405	788		Light	High	Peak Found	High	-0.19	0.0002	0.0004096	2.99	51.27
	TRUE	High	[R].AVFQANQENLPILK.[R]	1xLabel:13C(6)15N(2) [K14]	0.00763087	0.000965695	1	1	1	P05023	P05023 [431-444]		0	1592.89								788	Redundant	Heavy	Peak Found	High	High	0.87	0.0008827	0.00628	2.68	51.27
	TRUE	High	[R].AVFQANQENLPILKR.[A]		0.0139742	0.00137984	1	1	1	P05023	P05023 [431-445]		1	1740.98								789	Redundant	Light	High	Peak Found	High	-0.73	0.001311	0.01099	2.97	43.1
	TRUE	High	[R].AVFQANQENLPILKR.[A]	1xLabel:13C(6)15N(2) [K14]; 1xLabel:13C(6)15N(4) [R15]	0.000211245	9.84928e-05	1	1	3	P05023	P05023 [431-445]		1	1759	1.611	0.0371004	0	76.6	123.4	1.76959e+07	21891294	789		Heavy	Peak Found	High	High	0.18	0.0001206	0.0001626	3.26	43.1
	TRUE	High	[K].DAFQNAYLELGGLGER.[V]		1.01521e-06	9.84928e-05	1	1	1	P05023	P05023 [536-551]		0	1752.86	1.677	0.115056	0	74.7	125.3	604554	778482	861		Light	High	Peak Found	High	0.24	0.0001206	7.093e-07	3.66	69.01
	TRUE	High	[K].DAFQNAYLELGGLGER.[V]	1xLabel:13C(6)15N(4) [R16]	0.0149195	0.00146171	1	1	1	P05023	P05023 [536-551]		0	1762.86								861	Redundant	Heavy	Peak Found	High	High	0.26	0.001368	0.01169	2.93	69.01
	TRUE	High	[R].DGPNALTPPPTTPEWIK.[F]		0.0017323	0.000424254	1	1	1	P05023	P05023 [75-91]		0	1833.94								1042	No Quan Values	Light	High	Not Found	High	-0.42	0.0003475	0.001432	3.07
	TRUE	High	[K].DMTSEQLDDILK.[Y]		0.00398056	0.00071665	1	1	2	P05023	P05023 [672-683]		0	1407.67	1.639	0.0387195	0	75.8	124.2	7.81803e+06	9842251	1209		Light	High	Peak Found	High	0.82	0.0007168	0.003341	2.03	56.08
	TRUE	High	[K].DMTSEQLDDILK.[Y]	1xLabel:13C(6)15N(2) [K12]	0.000217121	9.84928e-05	1	1	1	P05023	P05023 [672-683]		0	1415.68								1209	Redundant	Heavy	Peak Found	High	High	0.27	0.0001206	0.0001673	2.79	56.08
	TRUE	High	[K].DMTSEQLDDILK.[Y]	1xOxidation [M2]	0.000201336	9.84928e-05	1	1	1	P05023	P05023 [672-683]		0	1423.66	1.184	0.536432	0	91.6	108.4	6880263	6256585	1210		Light	High	Peak Found	High	0.36	0.0001206	0.0001541	2.57	48.69
	TRUE	High	[K].GVGIISEGNETVEDIAAR.[L]		1.37964e-08	9.84928e-05	1	3	1	P05023	P05023 [630-647]		0	1829.92	1.508	0.0759576	0	79.8	120.2	2.99343e+07	3.4659e+07	2914		Light	High	Peak Found	High	-0.2	0.0001206	8.98e-09	5.44	51.05
	TRUE	High	[K].GVGIISEGNETVEDIAAR.[L]	1xLabel:13C(6)15N(4) [R18]	8.0628e-08	9.84928e-05	1	3	3	P05023	P05023 [630-647]		0	1839.93								2914	Redundant	Heavy	Peak Found	High	High	0.15	0.0001206	5.391e-08	4.28	51.05
	TRUE	High	[K].KADIGVAMGIAGSDVSK.[Q]	1xOxidation [M8]	0.000197231	9.84928e-05	1	2	1	P05023	P05023 [727-743]		1	1634.84								3081	No Quan Values	Light	High	Not Found	High	2.34	0.0001206	0.0001515	3.59
	TRUE	High	[K].KADIGVAMGIAGSDVSK.[Q]	2xLabel:13C(6)15N(2) [K1; K17]	5.64941e-06	9.84928e-05	1	2	1	P05023	P05023 [727-743]		1	1634.88								3082	No Quan Values	Heavy	Not Found	High	High	-1.6	0.0001206	4.061e-06	4.38
	TRUE	High	[R].LNIPVSQVNPR.[D]		0.00022469	9.84928e-05	1	2	2	P05023	P05023 [648-658]		0	1236.71	1.29	0.296224	0	87.3	112.7	47938672	47492532	4212		Light	High	Peak Found	High	0.32	0.0001206	0.0001725	2.02	33.36
	TRUE	High	[R].LNIPVSQVNPR.[D]	1xLabel:13C(6)15N(4) [R11]	0.000338205	9.84928e-05	1	2	1	P05023	P05023 [648-658]		0	1246.71								4212	Redundant	Heavy	Peak Found	High	High	0.55	0.0001206	0.0002622	2.91	33.36
	TRUE	High	[K].IVEIPFNSTNK.[Y]		0.00324764	0.00071665	1	1	1	P05023	P05023 [477-487]		0	1261.68	1.49	0.0856254	0	80.3	119.7	13517581	15466093	4665		Light	High	Peak Found	High	-0.44	0.0005779	0.002711	2.59	37.6
	TRUE	High	[K].MSINAEEVVVGDLVEVK.[G]	1xLabel:13C(6)15N(2) [K17]	0.000361879	9.84928e-05	1	1	1	P05023	P05023 [178-194]		0	1838.97	1.155	0.670533	0	92.8	107.2	298394	264713	5330		Heavy	Peak Found	High	High	1.99	0.0001206	0.000282	3.05	69.16
	TRUE	High	[K].MSINAEEVVVGDLVEVK.[G]	1xOxidation [M1]	9.53275e-08	9.84928e-05	1	1	1	P05023	P05023 [178-194]		0	1846.95								5331	No Quan Values	Light	High	Not Found	High	1.59	0.0001206	6.402e-08	4.69
	TRUE	High	[K].NLEAVETLGSTSTICSDK.[T]	1xCarbamidomethyl [C15]; 1xLabel:13C(6)15N(2) [K18]	0.00855117	0.00104825	1	4	1	P05023	P05023 [360-377]		0	1932.93								5597	No Quan Values	Heavy	Not Found	High	High	-1.5	0.001011	0.006958	2.66
	TRUE	High	[K].NMVPQQALVIR.[EGN]	1xLabel:13C(6)15N(4) [R11]	0.116845	0.00821111	1	4	1	P05023	P05023 [163-173]		0	1278.72	1.553	0.0557058	0	78.3	121.7	14466822	17253722	5667		Heavy	Peak Found	High	High	0.61	0.006325	0.08594	1.88	40.66
	TRUE	High	[K].NMVPQQALVIR.[EGN]	1xOxidation [M2]	0.00548834	0.000965695	1	4	1	P05023	P05023 [163-173]		0	1284.71	1.503	0.0870203	0	79.9	120.1	8532566	9846594	5666		Light	High	Peak Found	High	0.14	0.0008827	0.004567	2.79	30.83
	TRUE	High	[K].NMVPQQALVIR.[EGN]	1xOxidation [M2]; 1xLabel:13C(6)15N(4) [R11]	0.00178994	0.000424254	1	4	1	P05023	P05023 [163-173]		0	1294.72								5666	Redundant	Heavy	Peak Found	High	High	0.07	0.0003475	0.001478	2.42	30.83
	TRUE	High	[K].QAADMILLDDNFASIVTGVEEGR.[L]	1xLabel:13C(6)15N(4) [R23]	0.00552766	0.000965695	1	4	1	P05023	P05023 [744-766]		0	2474.21								5831	No Quan Values	Heavy	Not Found	High	High	-2.28	0.0008827	0.004585	2.1
	TRUE	High	[K].QAADMILLDDNFASIVTGVEEGR.[L]	1xOxidation [M5]	1.57569e-06	9.84928e-05	1	4	2	P05023	P05023 [744-766]		0	2480.2	1.607	0.141596	0	76.7	123.3	710196	876563	5829		Light	High	Peak Found	High	1.03	0.0001206	1.105e-06	4.71	81.16
	TRUE	High	[K].QAADMILLDDNFASIVTGVEEGR.[L]	1xOxidation [M5]; 1xLabel:13C(6)15N(4) [R23]	5.26855e-07	9.84928e-05	1	4	2	P05023	P05023 [744-766]		0	2490.21								5829	Redundant	Heavy	Peak Found	High	High	0.73	0.0001206	3.645e-07	4.42	81.16
	TRUE	High	[R].QGAIVAVTGDGVNDSPALK.[K]		1.44871e-08	9.84928e-05	1	3	2	P05023	P05023 [708-726]		0	1811.95								5917	Redundant	Light	High	Not Found	High	-0.07	0.0001206	9.424e-09	5.29	39.9
	TRUE	High	[R].QGAIVAVTGDGVNDSPALK.[K]	1xLabel:13C(6)15N(2) [K19]	1.15107e-06	9.84928e-05	1	3	2	P05023	P05023 [708-726]		0	1819.96	0.01	1e-17		200		13512471		5917		Heavy	Peak Found	High	High	-0.69	0.0001206	8.055e-07	5.06	39.9
	TRUE	High	[R].QGAIVAVTGDGVNDSPALK.[K]	1xDeamidated [Q1]; 1xLabel:13C(6)15N(2) [K19]	0.00138717	0.000424254	1	3	1	P05023	P05023 [708-726]		0	1820.95								5919	Redundant	Heavy	Not Found	High	High	-3.84	0.0003475	0.001134	3.93
	TRUE	High	[R].QGAIVAVTGDGVNDSPALKK.[A]		2.39314e-05	9.84928e-05	1	3	2	P05023	P05023 [708-727]		1	1940.04	1.464	0.100425	0	81.2	118.8	9173907	10310911	5920		Light	High	Peak Found	High	-0.05	0.0001206	1.763e-05	3.97	31.01
	TRUE	High	[R].QGAIVAVTGDGVNDSPALKK.[A]	2xLabel:13C(6)15N(2) [K19; K20]	0.000232517	9.84928e-05	1	3	2	P05023	P05023 [708-727]		1	1956.07								5920	Redundant	Heavy	Peak Found	High	High	0.28	0.0001206	0.0001789	3.14	31.01
	TRUE	High	[R].SPDFTNENPLETR.[N]		6.45016e-06	9.84928e-05	1	1	2	P05023	P05023 [228-240]		0	1519.7	1.246	0.377406	0	89	111	29592478	28320942	6643		Light	High	Peak Found	High	-0.02	0.0001206	4.652e-06	4.2	38.72
	TRUE	High	[R].SPDFTNENPLETR.[N]	1xLabel:13C(6)15N(4) [R13]	3.89719e-05	9.84928e-05	1	1	3	P05023	P05023 [228-240]		0	1529.71								6643	Redundant	Heavy	Peak Found	High	High	0.16	0.0001206	2.889e-05	3.89	38.72
	TRUE	High	[K].TSATWLALSR.[I]		0.000313891	9.84928e-05	1	1	2	P05023	P05023 [414-423]		0	1105.6								7350	Redundant	Light	High	Peak Found	High	-0.79	0.0001206	0.0002432	2.73	43.24
	TRUE	High	[K].TSATWLALSR.[I]	1xLabel:13C(6)15N(4) [R10]	5.67466e-05	9.84928e-05	1	1	1	P05023	P05023 [414-423]		0	1115.61	1.511	0.0716068	0	79.6	120.4	11030918	12802505	7350		Heavy	Peak Found	High	High	-0.53	0.0001206	4.233e-05	2.96	43.24
	TRUE	High	[KR].VIMVTGDHPITAK.[A]	1xLabel:13C(6)15N(2) [K13]	0.0032043	0.00071665	2	6	1	P05023; P54707	P05023 [613-625]; P54707 [628-640]		0	1389.77								7907	No Quan Values	Heavy	Not Found	High	High	0.94	0.0005779	0.002689	2.03
	TRUE	High	[KR].VIMVTGDHPITAK.[A]	1xOxidation [M3]; 1xLabel:13C(6)15N(2) [K13]	0.00130795	0.000339819	2	6	1	P05023; P54707	P05023 [613-625]; P54707 [628-640]		0	1405.76	1.39	0.32369	0	83.7	116.3	1.93072e+06	2.06112e+06	7906	Shared	Heavy	Peak Found	High	High	0.14	0.0002891	0.001067	1.45	20.61
	TRUE	High	[K].YHTEIVFAR.[T]	1xLabel:13C(6)15N(4) [R9]	0.000719407	0.00021741	1	1	1	P05023	P05023 [684-692]		0	1145.6	2.119	0.00275526	0	64.1	135.9	2.72253e+06	4430637	8427		Heavy	Peak Found	High	High	0.12	0.0002	0.0005741	2.97	26.14
TRUE	High	Master Protein	O00161	Synaptosomal-associated protein 23 OS=Homo sapiens OX=9606 GN=SNAP23 PE=1 SV=1	0	224.625	60	13	68	13	211	23.3	5.01	254.51	13	Pf00835	8773	ENSG00000092531	SNAP23	hsa:8773; O00161; O00162; Q13602; Q6IAE3	Insulin signaling	Translocation of SLC2A4 (GLUT4) to the plasma membrane; RHOA GTPase cycle; CDC42 GTPase cycle; RAC1 GTPase cycle; RHOQ GTPase cycle; ER-Phagosome pathway; RAC3 GTPase cycle; RHOB GTPase cycle; RHOJ GTPase cycle; RHOF GTPase cycle; Neutrophil degranulation; trans-Golgi Network Vesicle Budding	SNARE interactions in vesicular transport; Platelet activation	15	0	1.264	0.363046	13.84	88.1	111.9	1.83092e+08	1.78602e+08	High	High	1	Acetyl [N-Term]
	Checked	Confidence	Annotated Sequence	Modifications	Qvality PEP	Qvality q-value	# Protein Groups	# Proteins	# PSMs	Master Protein Accessions	Positions in Master Proteins	Modifications in Master Proteins	# Missed Cleavages	Theo. MH+ [Da]	Abundance Ratio: (Heavy) / (Light)	Abundance Ratio P-Value: (Heavy) / (Light)	Abundance Ratio Variability [%]: (Heavy) / (Light)	Abundances (Grouped): Light	Abundances (Grouped): Heavy	Abundance: F1: Light, Sample	Abundance: F1: Heavy, Sample	Precursor Quan Result ID	Quan Info	Quan Channel	Found in Sample: [S1] F1: Light, Sample	Found in Sample: [S3] F1: Heavy, Sample	Confidence (by Search Engine): Sequest HT	DeltaM [ppm] (by Search Engine): Sequest HT	Percolator q-Value (by Search Engine): Sequest HT	Percolator PEP (by Search Engine): Sequest HT	XCorr (by Search Engine): Sequest HT	Top Apex RT [min]
	TRUE	High	[K].DMALNIGNEIDAQNPQIK.[R]		1.07349e-06	9.84928e-05	1	1	1	O00161	O00161 [168-185]		0	1983.98								1199	Redundant	Light	High	Peak Found	High	3.14	0.0001206	7.492e-07	4.26	55.33
	TRUE	High	[K].DMALNIGNEIDAQNPQIK.[R]	1xLabel:13C(6)15N(2) [K18]	0.00035702	9.84928e-05	1	1	2	O00161	O00161 [168-185]		0	1991.99	1.365	0.276511	0	84.6	115.4	4.58717e+06	4.80707e+06	1199		Heavy	Peak Found	High	High	0.59	0.0001206	0.0002774	3.54	55.33
	TRUE	High	[K].DMALNIGNEIDAQNPQIK.[R]	1xOxidation [M2]	4.54215e-05	9.84928e-05	1	1	2	O00161	O00161 [168-185]		0	1999.98	1.146	0.674662	0	93.2	106.8	4.56403e+06	4.0155e+06	1197		Light	High	Peak Found	High	1.46	0.0001206	3.386e-05	2.41	47.76
	TRUE	High	[K].DMALNIGNEIDAQNPQIK.[R]	1xOxidation [M2]; 1xLabel:13C(6)15N(2) [K18]	6.77311e-07	9.84928e-05	1	1	1	O00161	O00161 [168-185]		0	2007.99								1197	Redundant	Heavy	Peak Found	High	High	-1.54	0.0001206	4.711e-07	4.55	47.76
	TRUE	High	[K].DMALNIGNEIDAQNPQIKR.[I]		0.000105255	9.84928e-05	1	1	1	O00161	O00161 [168-186]		1	2140.08	1.24	0.524134	0	89.3	110.7	2.35136e+06	2.23982e+06	1201		Light	High	Peak Found	High	-0.53	0.0001206	7.981e-05	3.2	47.89
	TRUE	High	[K].DMALNIGNEIDAQNPQIKR.[I]	1xOxidation [M2]	0.0216796	0.00204583	1	1	1	O00161	O00161 [168-186]		1	2156.08	13.508	1e-17	0	13.8	186.2	1.15847e+06	1.20174e+07	1200		Light	High	Peak Found	High	1.23	0.001781	0.01652	3.12	40.53
	TRUE	High	[K].DMALNIGNEIDAQNPQIKR.[I]	1xOxidation [M2]; 1xLabel:13C(6)15N(2) [K18]; 1xLabel:13C(6)15N(4) [R19]	2.78966e-05	9.84928e-05	1	1	2	O00161	O00161 [168-186]		1	2174.1								1200	Redundant	Heavy	Peak Found	High	High	0.77	0.0001206	2.064e-05	3.7	40.59
	TRUE	High	[R].EDEMEENLTQVGSILGNLK.[D]		2.91093e-08	9.84928e-05	1	1	4	O00161	O00161 [149-167]		0	2119.02	1.338	0.223804	0	85.5	114.5	1.23147e+07	1.26582e+07	1538		Light	High	Peak Found	High	-0.34	0.0001206	1.919e-08	4.6	76.48
	TRUE	High	[R].EDEMEENLTQVGSILGNLK.[D]	1xLabel:13C(6)15N(2) [K19]	1.43863e-08	9.84928e-05	1	1	3	O00161	O00161 [149-167]		0	2127.04								1538	Redundant	Heavy	Peak Found	High	High	-0.47	0.0001206	9.378e-09	5.16	76.48
	TRUE	High	[R].EDEMEENLTQVGSILGNLK.[D]	1xOxidation [M4]	1.98345e-07	9.84928e-05	1	1	3	O00161	O00161 [149-167]		0	2135.02	1.306	0.27066	0	86.7	113.3	18318971	1.83707e+07	1537		Light	High	Peak Found	High	0.59	0.0001206	1.347e-07	4.67	66.93
	TRUE	High	[R].EDEMEENLTQVGSILGNLK.[D]	1xOxidation [M4]; 1xLabel:13C(6)15N(2) [K19]	3.7954e-07	9.84928e-05	1	1	2	O00161	O00161 [149-167]		0	2143.03								1537	Redundant	Heavy	Peak Found	High	High	0	0.0001206	2.614e-07	4.23	66.93
	TRUE	High	[R].IEEGLDQINK.[D]		0.0260649	0.00211525	1	1	1	O00161	O00161 [55-64]		0	1158.6	1.14	0.691062	0	93.5	106.5	4.55117e+06	3.98332e+06	3503		Light	High	Peak Found	High	0.15	0.001829	0.01974	2.69	23.59
	TRUE	High	[R].IEEGLDQINKDMR.[E]		0.00909405	0.00104825	1	1	1	O00161	O00161 [55-67]		1	1560.77	1.542	0.0960355	0	78.7	121.3	5254410	6222725	3504		Light	High	Peak Found	High	-0.45	0.001011	0.007378	2.63	30.7
	TRUE	High	[R].IEEGLDQINKDMR.[E]	1xOxidation [M12]	0.0481153	0.00381141	1	1	1	O00161	O00161 [55-67]		1	1576.76	1.342	0.365753	0	85.4	114.6	2.0159e+06	2.07767e+06	3505		Light	High	Peak Found	High	0.23	0.003042	0.03524	2.34	21.43
	TRUE	High	[R].IEEGLDQINKDMR.[E]	1xLabel:13C(6)15N(2) [K10]; 1xLabel:13C(6)15N(4) [R13]	0.00054825	0.00021741	1	1	1	O00161	O00161 [55-67]		1	1578.79								3504	Redundant	Heavy	Peak Found	High	High	-0.44	0.0002	0.0004328	2.99	30.7
	TRUE	High	[R].IEEGLDQINKDMR.[E]	1xOxidation [M12]; 1xLabel:13C(6)15N(2) [K10]; 1xLabel:13C(6)15N(4) [R13]	0.000804816	0.00021741	1	1	1	O00161	O00161 [55-67]		1	1594.79								3505	Redundant	Heavy	Peak Found	High	High	0.61	0.0002	0.0006446	2.58	21.43
	TRUE	High	[R].ILGLAIESQDAGIK.[T]		5.30559e-06	9.84928e-05	1	1	2	O00161	O00161 [27-40]		0	1427.81								3971	Redundant	Light	High	Peak Found	High	0.26	0.0001206	3.798e-06	3.76	51.78
	TRUE	High	[R].ILGLAIESQDAGIK.[T]	1xLabel:13C(6)15N(2) [K14]	4.9825e-07	9.84928e-05	1	1	3	O00161	O00161 [27-40]		0	1435.82	1.264	0.34323	0	88.4	111.6	42975304	41704628	3971		Heavy	Peak Found	High	High	-0.36	0.0001206	3.439e-07	4.29	51.78
	TRUE	High	[R].ITNDAREDEMEENLTQVGSILGNLK.[D]		0.0130943	0.00137984	1	1	1	O00161	O00161 [143-167]		1	2789.36								4602	No Quan Values	Light	High	Not Found	High	-1.63	0.001254	0.01034	3.29
	TRUE	High	[-].MDNLSSEEIQQR.[A]	1xAcetyl [N-Term]	8.60873e-05	9.84928e-05	1	1	2	O00161	O00161 [1-12]	O00161 1xAcetyl [N-Term]	0	1491.67	1.323	0.244742	0	86.1	113.9	22421644	22782984	5030		Light	High	Peak Found	High	2.73	0.0001206	6.461e-05	3.02	43.15
	TRUE	High	[-].MDNLSSEEIQQR.[A]	1xAcetyl [N-Term]; 1xLabel:13C(6)15N(4) [R12]	0.00183747	0.000424254	1	1	1	O00161	O00161 [1-12]	O00161 1xAcetyl [N-Term]	0	1501.68								5030	Redundant	Heavy	Peak Found	High	High	0.22	0.0003475	0.001516	2.98	43.15
	TRUE	High	[K].QPGPVTNGQLQQPTTGAASGGYIK.[R]		0.000311767	9.84928e-05	1	1	1	O00161	O00161 [118-141]		0	2370.2	0.999	0.90122	0	100.1	99.9	7.25335e+06	5.56338e+06	6039		Light	High	Peak Found	High	1.42	0.0001206	0.0002422	4.28	35.79
	TRUE	High	[K].QPGPVTNGQLQQPTTGAASGGYIK.[R]	1xLabel:13C(6)15N(2) [K24]	7.31318e-06	9.84928e-05	1	1	3	O00161	O00161 [118-141]		0	2378.22								6039	Redundant	Heavy	Peak Found	High	High	0.11	0.0001206	5.273e-06	5.13	35.79
	TRUE	High	[K].QPGPVTNGQLQQPTTGAASGGYIKR.[I]		5.45478e-08	9.84928e-05	1	1	2	O00161	O00161 [118-142]		1	2526.31	0.923	0.60041	0	104	96	48130792	34112144	6042		Light	High	Peak Found	High	-0.22	0.0001206	3.626e-08	3.89	29.41
	TRUE	High	[K].QPGPVTNGQLQQPTTGAASGGYIKR.[I]	1xLabel:13C(6)15N(2) [K24]; 1xLabel:13C(6)15N(4) [R25]	2.58382e-05	9.84928e-05	1	1	2	O00161	O00161 [118-142]		1	2544.33								6042	Redundant	Heavy	Peak Found	High	High	0.24	0.0001206	1.9e-05	4.59	29.41
	TRUE	High	[K].QPGPVTNGQLQQPTTGAASGGYIKR.[I]	1xDeamidated [Q]; 1xLabel:13C(6)15N(2) [K24]; 1xLabel:13C(6)15N(4) [R25]	0.00269366	0.000632611	1	1	2	O00161	O00161 [118-142]		1	2545.31								6041	Redundant	Heavy	Peak Found	High	High	4.92	0.0004992	0.002255	4.46	31.8
	TRUE	High	[R].RILGLAIESQDAGIK.[T]		0.00309863	0.000632611	1	1	1	O00161	O00161 [26-40]		1	1583.91	1.195	0.638529	0	91.1	108.9	2.48362e+06	2.27958e+06	6192		Light	High	Peak Found	High	-0.37	0.0004992	0.002595	2.83	44.92
	TRUE	High	[K].TTWGDGGENSPCNVVSK.[Q]	1xCarbamidomethyl [C12]	1.46949e-06	9.84928e-05	1	1	1	O00161	O00161 [101-117]		0	1807.79	1.041	0.936972	0	98	102	1.45044e+06	1159533	7415		Light	High	Peak Found	High	0.48	0.0001206	1.032e-06	4.35	28.61
	TRUE	High	[K].TTWGDGGENSPCNVVSK.[Q]	1xCarbamidomethyl [C12]; 1xLabel:13C(6)15N(2) [K17]	3.3436e-05	9.84928e-05	1	1	1	O00161	O00161 [101-117]		0	1815.81								7415	Redundant	Heavy	Peak Found	High	High	-0.48	0.0001206	2.465e-05	3.9	28.61
	TRUE	High	[K].TTWGDGGENSPCNVVSKQPGPVTNGQLQQPTTGAASGGYIKR.[I]	1xCarbamidomethyl [C12]; 2xDeamidated [Q26; Q28]; 1xLabel:13C(6)15N(2) [K41]; 1xLabel:13C(6)15N(4) [R42]	0.0829165	0.0061531	1	1	1	O00161	O00161 [101-142]		2	4335.07									No Quan Values		Not Found	Not Found	High	4	0.00468	0.06033	3.16
TRUE	High	Master Protein	P06733	Alpha-enolase OS=Homo sapiens OX=9606 GN=ENO1 PE=1 SV=2	0	214.778	47	16	68	15	434	47.1	7.39	247.19	16	Pf00113, Pf03952	2023	ENSG00000074800	ENO1	B2RD59; hsa:2023; P06733; P22712; Q16704; Q4TUS4; Q53FT9; Q53HR3; Q658M5; Q6GMP2; Q71V37; Q7Z3V6; Q8WU71; Q96GV1; Q9BT62; Q9UCH6; Q9UM55	Clear cell renal cell carcinoma pathways; Metabolic reprogramming in colon cancer; Aerobic glycolysis; IL-18 signaling pathway; Glycolysis and gluconeogenesis	Glycolysis; Gluconeogenesis; Manipulation of host energy metabolism	Glycolysis / Gluconeogenesis; Metabolic pathways; Carbon metabolism; Biosynthesis of amino acids; RNA degradation; HIF-1 signaling pathway	14	1	1.098	0.718715	12.24	97.7	102.3	1.62669e+08	130782278	High	High	1
	Checked	Confidence	Annotated Sequence	Modifications	Qvality PEP	Qvality q-value	# Protein Groups	# Proteins	# PSMs	Master Protein Accessions	Positions in Master Proteins	Modifications in Master Proteins	# Missed Cleavages	Theo. MH+ [Da]	Abundance Ratio: (Heavy) / (Light)	Abundance Ratio P-Value: (Heavy) / (Light)	Abundance Ratio Variability [%]: (Heavy) / (Light)	Abundances (Grouped): Light	Abundances (Grouped): Heavy	Abundance: F1: Light, Sample	Abundance: F1: Heavy, Sample	Precursor Quan Result ID	Quan Info	Quan Channel	Found in Sample: [S1] F1: Light, Sample	Found in Sample: [S3] F1: Heavy, Sample	Confidence (by Search Engine): Sequest HT	DeltaM [ppm] (by Search Engine): Sequest HT	Percolator q-Value (by Search Engine): Sequest HT	Percolator PEP (by Search Engine): Sequest HT	XCorr (by Search Engine): Sequest HT	Top Apex RT [min]
	TRUE	High	[R].AAVPSGASTGIYEALELR.[D]		1.29587e-07	9.84928e-05	2	3	3	P09104; P06733	P09104 [33-50]; P06733 [33-50]		0	1804.94	1.048	0.943414	0	97.7	102.3	35796480	2.88063e+07	81	Shared	Light	High	Peak Found	High	-0.09	0.0001206	8.731e-08	4.15	60.35
	TRUE	High	[R].AAVPSGASTGIYEALELR.[D]	1xLabel:13C(6)15N(4) [R18]	3.12179e-07	9.84928e-05	2	3	3	P09104; P06733	P09104 [33-50]; P06733 [33-50]		0	1814.95								81	Redundant	Heavy	Peak Found	High	High	-0.27	0.0001206	2.136e-07	4.68	60.35
	TRUE	High	[K].DATNVGDEGGFAPNILENK.[E]		2.95184e-08	9.84928e-05	1	1	3	P06733	P06733 [203-221]		0	1960.92								894	Redundant	Light	High	Peak Found	High	-0.53	0.0001206	1.938e-08	4.97	52.22
	TRUE	High	[K].DATNVGDEGGFAPNILENK.[E]	1xLabel:13C(6)15N(2) [K19]	1.85e-06	9.84928e-05	1	1	2	P06733	P06733 [203-221]		0	1968.94	1.03	0.992533	0	98.5	101.5	2.47417e+07	1.95716e+07	894		Heavy	Peak Found	High	High	-0.79	0.0001206	1.303e-06	4.18	52.22
	TRUE	High	[K].DATNVGDEGGFAPNILENKEGLELLK.[T]		5.84996e-06	9.84928e-05	1	1	2	P06733	P06733 [203-228]		1	2743.38	1.097	0.819495	0	95.4	104.6	8937512	7526580	896		Light	High	Peak Found	High	-0.28	0.0001206	4.216e-06	3.87	67.12
	TRUE	High	[K].DATNVGDEGGFAPNILENKEGLELLK.[T]	2xLabel:13C(6)15N(2) [K19; K26]	0.00713388	0.000965695	1	1	1	P06733	P06733 [203-228]		1	2759.41								896	Redundant	Heavy	Peak Found	High	High	-0.04	0.0008827	0.005851	3.39	67.12
	TRUE	High	[K].DYPVVSIEDPFDQDDWGAWQK.[F]		0.000100273	9.84928e-05	1	1	2	P06733	P06733 [286-306]		0	2510.11	0.01	1e-17		200		143428		1423		Light	High	Not Found	High	0.41	0.0001206	7.585e-05	4.06	82.1
	TRUE	High	[R].EIFDSRGNPTVEVDLFTSK.[G]	1xDeamidated [N8]	0.0538983	0.00403872	1	1	1	P06733	P06733 [10-28]		1	2155.06	3.096	0.000280208	0	48.8	151.2	510044	1.21282e+06	1800		Light	High	Peak Found	High	-4.18	0.003203	0.03963	3.01	59.07
	TRUE	High	[R].GNPTVEVDLFTSK.[G]		0.000179132	9.84928e-05	1	1	2	P06733	P06733 [16-28]		0	1406.72	1.031	0.995524	0	98.5	101.5	19192690	15194292	2749		Light	High	Peak Found	High	-0.34	0.0001206	0.0001368	2.69	47.94
	TRUE	High	[R].GNPTVEVDLFTSK.[G]	1xLabel:13C(6)15N(2) [K13]	0.000794274	0.00021741	1	1	2	P06733	P06733 [16-28]		0	1414.73								2749	Redundant	Heavy	Peak Found	High	High	-0.97	0.0002	0.0006367	2.81	47.94
	TRUE	High	[R].HIADLAGNSEVILPVPAFNVINGGSHAGNK.[L]		7.03896e-05	9.84928e-05	1	1	3	P06733	P06733 [133-162]		0	3011.57								3018	Redundant	Light	High	Peak Found	High	-0.35	0.0001206	5.285e-05	4.38	66.2
	TRUE	High	[R].HIADLAGNSEVILPVPAFNVINGGSHAGNK.[L]	1xLabel:13C(6)15N(2) [K30]	6.65843e-05	9.84928e-05	1	1	1	P06733	P06733 [133-162]		0	3019.58	0.914	0.628167	0	104.5	95.5	7.22402e+06	5.06849e+06	3018		Heavy	Peak Found	High	High	0.31	0.0001206	4.981e-05	4.76	66.17
	TRUE	High	[K].LAMQEFMILPVGAANFR.[E]		0.000605674	0.00021741	1	1	1	P06733	P06733 [163-179]		0	1907.99	1.038	0.864695	0	98.1	101.9	532765	424604	3327		Light	High	Peak Found	High	2.65	0.0002	0.000479	3.26	80.29
	TRUE	High	[K].LAMQEFMILPVGAANFR.[E]	1xLabel:13C(6)15N(4) [R17]	0.022796	0.00204583	1	1	1	P06733	P06733 [163-179]		0	1918								3327	Redundant	Heavy	Peak Found	High	High	-0.08	0.001781	0.01731	2.53	80.29
	TRUE	High	[K].LAMQEFMILPVGAANFR.[E]	1xOxidation [M]	3.03586e-07	9.84928e-05	1	1	3	P06733	P06733 [163-179]		0	1923.98	1.137	0.738584	0	93.6	106.4	2.0509e+06	1.79106e+06	3328		Light	High	Peak Found	High	1.07	0.0001206	2.073e-07	4.82	71.27
	TRUE	High	[K].LAMQEFMILPVGAANFR.[E]	1xOxidation [M7]; 1xLabel:13C(6)15N(4) [R17]	6.01551e-06	9.84928e-05	1	1	1	P06733	P06733 [163-179]		0	1933.99								3328	Redundant	Heavy	Peak Found	High	High	-1.78	0.0001206	4.316e-06	4.59	73.05
	TRUE	High	[K].LAMQEFMILPVGAANFR.[E]	2xOxidation [M3; M7]	6.31565e-08	9.84928e-05	1	1	1	P06733	P06733 [163-179]		0	1939.98	1.098	0.787895	0	95.3	104.7	3604164	3.04013e+06	3330		Light	High	Peak Found	High	-1.3	0.0001206	4.202e-08	4.92	65.37
	TRUE	High	[K].LAMQEFMILPVGAANFR.[E]	2xOxidation [M3; M7]; 1xLabel:13C(6)15N(4) [R17]	1.11923e-07	9.84928e-05	1	1	1	P06733	P06733 [163-179]		0	1949.99								3330	Redundant	Heavy	Peak Found	High	High	-0.52	0.0001206	7.554e-08	4.05	65.37
	TRUE	High	[K].LAQANGWGVMVSHR.[S]		0.00050615	0.00021741	1	1	3	P06733	P06733 [359-372]		0	1525.77	1.399	0.163192	0	83.4	116.6	8621433	9264181	3349		Light	High	Peak Found	High	-0.51	0.0002	0.0003991	2.52	33.81
	TRUE	High	[K].LAQANGWGVMVSHR.[S]	1xOxidation [M10]; 1xLabel:13C(6)15N(4) [R14]	0.000215637	9.84928e-05	1	1	1	P06733	P06733 [359-372]		0	1551.77	2.446	0.00172417	0	58	142	883621	1.66018e+06	3350		Heavy	Peak Found	High	High	-2.52	0.0001206	0.0001658	3.01	25.1
	TRUE	High	[K].IDKLMIEMDGTENK.[S]		0.0489049	0.00381141	1	1	1	P06733	P06733 [90-103]		1	1636.79	0.815	0.373415	0	110.2	89.8	3.09881e+06	1.94035e+06	3437		Light	High	Peak Found	High	2.66	0.003042	0.03583	2.92	35.11
	TRUE	High	[K].LMIEMDGTENK.[S]		0.00274791	0.000632611	1	1	1	P06733	P06733 [93-103]		0	1280.59	1.195	0.56573	0	91.1	108.9	4415068	4.05287e+06	4159		Light	High	Peak Found	High	0.26	0.0004992	0.002293	2.51	32.3
	TRUE	High	[K].LMIEMDGTENK.[S]	1xLabel:13C(6)15N(2) [K11]	0.000442826	0.00021741	1	1	1	P06733	P06733 [93-103]		0	1288.6								4159	Redundant	Heavy	Peak Found	High	High	0.7	0.0002	0.0003478	2.72	32.3
	TRUE	High	[R].SGKYDLDFKSPDDPSR.[Y]		0.00314044	0.00071665	1	1	1	P06733	P06733 [254-269]		2	1826.86								6432	Redundant	Light	High	Peak Found	High	-0.15	0.0005779	0.002635	2.95	26.99
	TRUE	High	[R].SGKYDLDFKSPDDPSR.[Y]	2xLabel:13C(6)15N(2) [K3; K9]; 1xLabel:13C(6)15N(4) [R16]	0.00486656	0.000910608	1	1	1	P06733	P06733 [254-269]		2	1852.89	0.825	0.261497	0	109.6	90.4	1.25879e+07	7976944	6432		Heavy	Peak Found	High	High	0.87	0.0008524	0.004048	2.81	26.9
	TRUE	High	[K].VNQIGSVTESLQACK.[L]	1xCarbamidomethyl [C14]	2.53242e-06	9.84928e-05	1	1	1	P06733	P06733 [344-358]		0	1633.82								8036	Redundant	Light	High	Not Found	High	-0.74	0.0001206	1.79e-06	4
	TRUE	High	[K].VNQIGSVTESLQACK.[L]	1xCarbamidomethyl [C14]; 1xLabel:13C(6)15N(2) [K15]	1.68957e-06	9.84928e-05	1	1	1	P06733	P06733 [344-358]		0	1641.84								8036	No Quan Values	Heavy	Not Found	High	High	1.17	0.0001206	1.189e-06	4.33
	TRUE	High	[K].YGKDATNVGDEGGFAPNILENK.[E]		2.01157e-06	9.84928e-05	1	1	3	P06733	P06733 [200-221]		1	2309.1	1.189	0.503102	0	91.4	108.6	7769844	7095063	8402		Light	High	Peak Found	High	-0.41	0.0001206	1.421e-06	5.12	44.53
	TRUE	High	[K].YGKDATNVGDEGGFAPNILENK.[E]	2xLabel:13C(6)15N(2) [K3; K22]	0.000211245	9.84928e-05	1	1	2	P06733	P06733 [200-221]		1	2325.13								8402	Redundant	Heavy	Peak Found	High	High	-0.17	0.0001206	0.0001619	4.25	44.53
	TRUE	High	[K].YGKDATNVGDEGGFAPNILENKEGLELLK.[T]		7.78749e-07	9.84928e-05	1	1	1	P06733	P06733 [200-228]		2	3091.56	1.718	0.0387232	0	73.6	126.4	2.91494e+06	3.84595e+06	8404		Light	High	Peak Found	High	0.5	0.0001206	5.419e-07	5.08	61.75
	TRUE	High	[K].YGKDATNVGDEGGFAPNILENKEGLELLK.[T]	3xLabel:13C(6)15N(2) [K3; K22; K29]	7.70398e-05	9.84928e-05	1	1	2	P06733	P06733 [200-228]		2	3115.6								8404	Redundant	Heavy	Peak Found	High	High	-0.09	0.0001206	5.806e-05	3.98	61.75
	TRUE	High	[R].YISPDQLADLYK.[S]		4.1492e-05	9.84928e-05	1	1	1	P06733	P06733 [270-281]		0	1425.73								8473	Redundant	Light	High	Peak Found	High	-0.37	0.0001206	3.085e-05	2.52	56.85
	TRUE	High	[R].YISPDQLADLYK.[S]	1xLabel:13C(6)15N(2) [K12]	0.00662522	0.000965695	1	1	1	P06733	P06733 [270-281]		0	1433.74	1.123	0.700272	0	94.2	105.8	14272228	12310818	8473		Heavy	Peak Found	High	High	-1.33	0.0008827	0.005479	2.64	56.85
TRUE	High	Master Protein	Q9BQE3	Tubulin alpha-1C chain OS=Homo sapiens OX=9606 GN=TUBA1C PE=1 SV=1	0	210.135	42	15	99	2	449	49.9	5.1	313.55	15	Pf00091, Pf03953	84790	ENSG00000167553	TUBA1C	hsa:84790; Q9BQE3	Alzheimer's disease and miRNA effects; Pathogenic Escherichia coli infection; Parkin-ubiquitin proteasomal system pathway; VEGFA-VEGFR2 signaling pathway; Alzheimer's disease	Separation of Sister Chromatids; The role of GTSE1 in G2/M progression after G2 checkpoint; Resolution of Sister Chromatid Cohesion; RHO GTPases Activate Formins; EML4 and NUDC in mitotic spindle formation; COPI-mediated anterograde transport; Recruitment of NuMA to mitotic centrosomes; HCMV Early Events; COPI-independent Golgi-to-ER retrograde traffic; HSP90 chaperone cycle for steroid hormone r…	Phagosome; Apoptosis; Tight junction; Gap junction; Alzheimer disease; Parkinson disease; Amyotrophic lateral sclerosis; Huntington disease; Prion disease; Pathways of neurodegeneration; Pathogenic Escherichia coli infection; Salmonella infection	47	0	1.331	0.265115	15.03	85.8	114.2	6.28246e+06	6.41991e+06	High	Peak Found	1
	Checked	Confidence	Annotated Sequence	Modifications	Qvality PEP	Qvality q-value	# Protein Groups	# Proteins	# PSMs	Master Protein Accessions	Positions in Master Proteins	Modifications in Master Proteins	# Missed Cleavages	Theo. MH+ [Da]	Abundance Ratio: (Heavy) / (Light)	Abundance Ratio P-Value: (Heavy) / (Light)	Abundance Ratio Variability [%]: (Heavy) / (Light)	Abundances (Grouped): Light	Abundances (Grouped): Heavy	Abundance: F1: Light, Sample	Abundance: F1: Heavy, Sample	Precursor Quan Result ID	Quan Info	Quan Channel	Found in Sample: [S1] F1: Light, Sample	Found in Sample: [S3] F1: Heavy, Sample	Confidence (by Search Engine): Sequest HT	DeltaM [ppm] (by Search Engine): Sequest HT	Percolator q-Value (by Search Engine): Sequest HT	Percolator PEP (by Search Engine): Sequest HT	XCorr (by Search Engine): Sequest HT	Top Apex RT [min]
	TRUE	High	[R].AVCMLSNTTAVAEAWAR.[L]	1xCarbamidomethyl [C3]	0.0841782	0.0061531	1	1	1	Q9BQE3	Q9BQE3 [374-390]		0	1850.89	1.203	0.546859	0	90.8	109.2	3.31863e+06	3.06659e+06	776		Light	High	Peak Found	High	0.15	0.004782	0.06147	2.41	66.36
	TRUE	High	[R].AVCMLSNTTAVAEAWAR.[L]	1xCarbamidomethyl [C3]; 1xOxidation [M4]	0.0229876	0.00204583	1	1	2	Q9BQE3	Q9BQE3 [374-390]		0	1866.88	1.473	0.190395	0	80.9	119.1	2.96383e+06	3.35332e+06	777		Light	High	Peak Found	High	-1.12	0.001781	0.01753	3.08	58.3
	TRUE	High	[R].AVFVDLEPTVIDEVR.[T]		1.38952e-07	9.84928e-05	2	3	7	P68363; Q9BQE3	P68363 [65-79]; Q9BQE3 [65-79]		0	1701.91								790	Redundant	Light	High	Peak Found	High	-0.51	0.0001206	9.355e-08	4.54	66.5
	TRUE	High	[R].AVFVDLEPTVIDEVR.[T]	1xLabel:13C(6)15N(4) [R15]	8.76702e-08	9.84928e-05	2	3	6	P68363; Q9BQE3	P68363 [65-79]; Q9BQE3 [65-79]		0	1711.91	1.1	0.765841	0	95.2	104.8	1.36522e+08	1.15316e+08	790	Shared	Heavy	Peak Found	High	High	-0.35	0.0001206	5.88e-08	4.64	66.5
	TRUE	High	[K].DVNAAIATIK.[T]		5.79428e-05	9.84928e-05	2	5	2	P68363; Q9BQE3	P68363 [327-336]; Q9BQE3 [327-336]		0	1015.58	1.277	0.318147	0	87.8	112.2	111327288	109206296	1381	Shared	Light	High	Peak Found	High	0.24	0.0001206	4.337e-05	3.05	32.57
	TRUE	High	[K].DVNAAIATIK.[T]	1xLabel:13C(6)15N(2) [K10]	5.9164e-05	9.84928e-05	2	5	4	P68363; Q9BQE3	P68363 [327-336]; Q9BQE3 [327-336]		0	1023.59								1381	Redundant	Heavy	Peak Found	High	High	0.19	0.0001206	4.421e-05	2.65	32.57
	TRUE	High	[K].DYEEVGADSADGEDEGEEY.[-]		7.08803e-05	9.84928e-05	1	1	1	Q9BQE3	Q9BQE3 [431-449]		0	2078.75									Indistinguishable Channels		Not Found	Not Found	High	0.65	0.0001206	5.33e-05	4.33	42.92
	TRUE	High	[K].EIIDLVLDR.[I]		0.000993428	0.00021741	2	3	1	P68363; Q9BQE3	P68363 [113-121]; Q9BQE3 [113-121]		0	1085.62	1.091	0.793206	0	95.6	104.4	7597223	6.36832e+06	1815	Shared	Light	High	Peak Found	High	-0.52	0.0002	0.0008049	2.09	59.66
	TRUE	High	[R].LDHKFDLMYAK.[R]		2.05291e-05	9.84928e-05	2	7	2	P68363; Q9BQE3	P68363 [391-401]; Q9BQE3 [391-401]		1	1380.7	1.555	0.0549889	0	78.3	121.7	2.42026e+07	2.88998e+07	3431	Shared	Light	High	Peak Found	High	0.08	0.0001206	1.507e-05	3.69	31.48
	TRUE	High	[R].LDHKFDLMYAK.[R]	1xOxidation [M8]	0.00037939	9.84928e-05	2	7	3	P68363; Q9BQE3	P68363 [391-401]; Q9BQE3 [391-401]		1	1396.69								3432	Redundant	Light	High	Peak Found	High	-0.06	0.0001206	0.0002967	2.4	24
	TRUE	High	[R].LDHKFDLMYAK.[R]	2xLabel:13C(6)15N(2) [K4; K11]	0.000163794	9.84928e-05	2	7	3	P68363; Q9BQE3	P68363 [391-401]; Q9BQE3 [391-401]		1	1396.73								3431	Redundant	Heavy	Peak Found	High	High	-0.44	0.0001206	0.0001252	3.83	31.48
	TRUE	High	[R].LDHKFDLMYAK.[R]	1xOxidation [M8]; 2xLabel:13C(6)15N(2) [K4; K11]	1.94155e-05	9.84928e-05	2	7	2	P68363; Q9BQE3	P68363 [391-401]; Q9BQE3 [391-401]		1	1412.72	1.169	0.559897	0	92.2	107.8	28375650	25472902	3432	Shared	Heavy	Peak Found	High	High	-0.56	0.0001206	1.423e-05	2.68	24
	TRUE	High	[R].LDHKFDLMYAKR.[A]		8.66865e-05	9.84928e-05	2	7	3	P68363; Q9BQE3	P68363 [391-402]; Q9BQE3 [391-402]		2	1536.8								3434	Redundant	Light	High	Peak Found	High	-0.59	0.0001206	6.542e-05	3.29	26.18
	TRUE	High	[R].LDHKFDLMYAKR.[A]	1xOxidation [M8]	0.0107177	0.00112166	2	7	1	P68363; Q9BQE3	P68363 [391-402]; Q9BQE3 [391-402]		2	1552.79								3433	Redundant	Light	High	Peak Found	High	-0.47	0.00106	0.008581	3	19.99
	TRUE	High	[R].LDHKFDLMYAKR.[A]	2xLabel:13C(6)15N(2) [K4; K11]; 1xLabel:13C(6)15N(4) [R12]	3.51527e-06	9.84928e-05	2	7	2	P68363; Q9BQE3	P68363 [391-402]; Q9BQE3 [391-402]		2	1562.84	1.516	0.0716302	0	79.5	120.5	1.64373e+07	1.9141e+07	3434	Shared	Heavy	Peak Found	High	High	0.26	0.0001206	2.509e-06	2.9	26.18
	TRUE	High	[R].LDHKFDLMYAKR.[A]	1xOxidation [M8]; 2xLabel:13C(6)15N(2) [K4; K11]; 1xLabel:13C(6)15N(4) [R12]	0.00138717	0.000424254	2	7	1	P68363; Q9BQE3	P68363 [391-402]; Q9BQE3 [391-402]		2	1578.83	1.567	0.0507455	0	77.9	122.1	12417272	14945700	3433	Shared	Heavy	Peak Found	High	High	0.37	0.0003475	0.001133	1.92	19.99
	TRUE	High	[R].IHFPLATYAPVISAEK.[A]		1.00099e-07	9.84928e-05	2	6	8	P68363; Q9BQE3	P68363 [265-280]; Q9BQE3 [265-280]		0	1756.96	0.995	0.863813	0	100.3	99.7	6.86046e+07	5.24217e+07	3810	Shared	Light	High	Peak Found	High	0.04	0.0001206	6.716e-08	3.81	59.48
	TRUE	High	[R].IHFPLATYAPVISAEK.[A]	1xLabel:13C(6)15N(2) [K16]	2.31256e-07	9.84928e-05	2	6	7	P68363; Q9BQE3	P68363 [265-280]; Q9BQE3 [265-280]		0	1764.98								3810	Redundant	Heavy	Peak Found	High	High	-0.28	0.0001206	1.579e-07	4.5	59.48
	TRUE	High	[R].LISQIVSSITASLR.[F]		0.000181614	9.84928e-05	2	5	2	P68363; Q9BQE3	P68363 [230-243]; Q9BQE3 [230-243]		0	1487.88	1.57	0.172879	0	77.8	122.2	309934	373797	4108	Shared	Light	High	Peak Found	High	0.41	0.0001206	0.000139	3.22	81.6
	TRUE	High	[R].LISQIVSSITASLR.[F]	1xLabel:13C(6)15N(4) [R14]	1.10388e-06	9.84928e-05	2	5	1	P68363; Q9BQE3	P68363 [230-243]; Q9BQE3 [230-243]		0	1497.89								4108	Redundant	Heavy	Peak Found	High	High	0.1	0.0001206	7.695e-07	3.59	81.6
	TRUE	High	[R].NLDIERPTYTNLNR.[L]		0.00278471	0.000632611	2	7	2	P68363; Q9BQE3	P68363 [216-229]; Q9BQE3 [216-229]		0	1718.88	0.962	0.743531	0	101.9	98.1	27214224	20114892	5593	Shared	Light	High	Peak Found	High	-0.52	0.0004992	0.002329	2.82	34.33
	TRUE	High	[R].QLFHPEQLITGK.[E]	1xLabel:13C(6)15N(2) [K12]	0.00022469	9.84928e-05	2	8	3	P68363; Q9BQE3	P68363 [85-96]; Q9BQE3 [85-96]		0	1418.79								5964	Redundant	Heavy	Peak Found	High	High	0.45	0.0001206	0.0001721	2	44.3
	TRUE	High	[R].QLFHPEQLITGKEDAANNYAR.[G]		1.12723e-06	9.84928e-05	2	6	7	P68363; Q9BQE3	P68363 [85-105]; Q9BQE3 [85-105]		1	2415.21	1.095	0.782794	0	95.5	104.5	73474220	61768460	5965	Shared	Light	High	Peak Found	High	0.14	0.0001206	7.904e-07	4.4	45.69
	TRUE	High	[R].QLFHPEQLITGKEDAANNYAR.[G]	1xLabel:13C(6)15N(2) [K12]; 1xLabel:13C(6)15N(4) [R21]	6.36083e-07	9.84928e-05	2	6	5	P68363; Q9BQE3	P68363 [85-105]; Q9BQE3 [85-105]		1	2433.23								5965	Redundant	Heavy	Peak Found	High	High	-0.13	0.0001206	4.397e-07	4.77	45.69
	TRUE	High	[K].TIGGGDDSFNTFFSETGAGK.[H]		2.34432e-09	9.84928e-05	2	5	5	P68363; Q9BQE3	P68363 [41-60]; Q9BQE3 [41-60]		0	2007.89	1.279	0.31523	0	87.8	112.2	6.81351e+07	66923235	7151	Shared	Light	High	Peak Found	High	-0.15	0.0001206	1.477e-09	6.21	59.65
	TRUE	High	[K].TIGGGDDSFNTFFSETGAGK.[H]	1xLabel:13C(6)15N(2) [K20]	4.45476e-09	9.84928e-05	2	5	5	P68363; Q9BQE3	P68363 [41-60]; Q9BQE3 [41-60]		0	2015.91								7151	Redundant	Heavy	Peak Found	High	High	0.14	0.0001206	2.842e-09	5.65	59.65
	TRUE	High	[K].TIGGGDDSFNTFFSETGAGKHVPR.[A]		2.11096e-05	9.84928e-05	2	5	2	P68363; Q9BQE3	P68363 [41-64]; Q9BQE3 [41-64]		1	2497.17	1.173	0.550135	0	92.1	107.9	3.35254e+07	3.01896e+07	7153	Shared	Light	High	Peak Found	High	-0.22	0.0001206	1.552e-05	2.55	51.68
	TRUE	High	[K].TIGGGDDSFNTFFSETGAGKHVPR.[A]	1xLabel:13C(6)15N(2) [K20]; 1xLabel:13C(6)15N(4) [R24]	1.38971e-06	9.84928e-05	2	5	3	P68363; Q9BQE3	P68363 [41-64]; Q9BQE3 [41-64]		1	2515.2								7153	Redundant	Heavy	Peak Found	High	High	0.36	0.0001206	9.729e-07	2.71	51.68
	TRUE	High	[K].VGINYQPPTVVPGGDLAK.[V]		6.10002e-07	9.84928e-05	2	7	4	P68363; Q9BQE3	P68363 [353-370]; Q9BQE3 [353-370]		0	1824.99								7754	Redundant	Light	High	Peak Found	High	-0.78	0.0001206	4.223e-07	3.98	50.5
	TRUE	High	[K].VGINYQPPTVVPGGDLAK.[V]	1xLabel:13C(6)15N(2) [K18]	1.17542e-06	9.84928e-05	2	7	2	P68363; Q9BQE3	P68363 [353-370]; Q9BQE3 [353-370]		0	1833	0.842	0.339183	0	108.6	91.4	149963217	96919101	7754	Shared	Heavy	Peak Found	High	High	-0.19	0.0001206	8.213e-07	3.71	50.5
TRUE	High	Master Protein	Q6IAA8	Ragulator complex protein LAMTOR1 OS=Homo sapiens OX=9606 GN=LAMTOR1 PE=1 SV=2	0	209.534	75	9	96	9	161	17.7	5.15	348.58	9	Pf15454	55004	ENSG00000149357	LAMTOR1	hsa:55004; Q6IAA8; Q8WZ09; Q9NWT0		Neutrophil degranulation; Regulation of PTEN gene transcription; RHOG GTPase cycle; TP53 Regulates Metabolic Genes; RAC2 GTPase cycle; RAC3 GTPase cycle; CDC42 GTPase cycle; RHOQ GTPase cycle; RHOJ GTPase cycle; RHOH GTPase cycle; Amino acids regulate mTORC1; RAC1 GTPase cycle; mTORC1-mediated signalling; Macroautophagy; Energy dependent regulation of mTOR by LKB1-AMPK	mTOR signaling pathway	17	0	0.839	0.486794	23.9	109.3	90.7	4.44798e+08	2.83738e+08	High	High	1
	Checked	Confidence	Annotated Sequence	Modifications	Qvality PEP	Qvality q-value	# Protein Groups	# Proteins	# PSMs	Master Protein Accessions	Positions in Master Proteins	Modifications in Master Proteins	# Missed Cleavages	Theo. MH+ [Da]	Abundance Ratio: (Heavy) / (Light)	Abundance Ratio P-Value: (Heavy) / (Light)	Abundance Ratio Variability [%]: (Heavy) / (Light)	Abundances (Grouped): Light	Abundances (Grouped): Heavy	Abundance: F1: Light, Sample	Abundance: F1: Heavy, Sample	Precursor Quan Result ID	Quan Info	Quan Channel	Found in Sample: [S1] F1: Light, Sample	Found in Sample: [S3] F1: Heavy, Sample	Confidence (by Search Engine): Sequest HT	DeltaM [ppm] (by Search Engine): Sequest HT	Percolator q-Value (by Search Engine): Sequest HT	Percolator PEP (by Search Engine): Sequest HT	XCorr (by Search Engine): Sequest HT	Top Apex RT [min]
	TRUE	High	[K].ALNGAEPNYHSLPSAR.[T]		2.12705e-06	9.84928e-05	1	1	4	Q6IAA8	Q6IAA8 [32-47]		0	1696.84								410	Redundant	Light	High	Peak Found	High	0.33	0.0001206	1.505e-06	4	25.2
	TRUE	High	[K].ALNGAEPNYHSLPSAR.[T]	1xLabel:13C(6)15N(4) [R16]	3.01186e-05	9.84928e-05	1	1	2	Q6IAA8	Q6IAA8 [32-47]		0	1706.85	0.723	0.0950577	0	116.1	83.9	112066807	62191170	410		Heavy	Peak Found	High	High	-0.58	0.0001206	2.217e-05	3.57	25.2
	TRUE	High	[K].ALNGAEPNYHSLPSAR.[T]	1xDeamidated [N3]; 1xLabel:13C(6)15N(4) [R16]	0.00220871	0.000424254	1	1	1	Q6IAA8	Q6IAA8 [32-47]		0	1707.83	0.3	4.73921e-05	0	153.9	46.1	2.94632e+06	678356	411		Heavy	Peak Found	High	High	1.55	0.0003475	0.001841	3.3	27.34
	TRUE	High	[R].KLLLDPSSPPTK.[A]		0.000519823	0.00021741	1	1	4	Q6IAA8	Q6IAA8 [20-31]		1	1295.76	0.791	0.213417	0	111.7	88.3	45921213	2.79053e+07	3168		Light	High	Peak Found	High	-0.09	0.0002	0.0004101	2.46	25.48
	TRUE	High	[R].KLLLDPSSPPTK.[A]	2xLabel:13C(6)15N(2) [K1; K12]	0.0139742	0.00137984	1	1	2	Q6IAA8	Q6IAA8 [20-31]		1	1311.79								3168	Redundant	Heavy	Peak Found	High	High	-0.01	0.001311	0.01098	2.75	25.48
	TRUE	High	[K].KLPPLPSLTSQPHQVLASEPIPFSDLQQVSR.[I]		0.000155006	9.84928e-05	1	1	5	Q6IAA8	Q6IAA8 [104-134]		1	3409.85	0.491	0.000497615	0	134.2	65.8	2.64938e+07	9983457	3179		Light	High	Peak Found	High	0.09	0.0001206	0.0001184	3.89	68.1
	TRUE	High	[K].KLPPLPSLTSQPHQVLASEPIPFSDLQQVSR.[I]	1xLabel:13C(6)15N(2) [K1]; 1xLabel:13C(6)15N(4) [R31]	0.00121719	0.000339819	1	1	2	Q6IAA8	Q6IAA8 [104-134]		1	3427.87								3179	Redundant	Heavy	Peak Found	High	High	-0.67	0.0002891	0.0009924	4.68	68.1
	TRUE	High	[K].KLPPLPSLTSQPHQVLASEPIPFSDLQQVSR.[I]	1xDeamidated [Q11]; 1xLabel:13C(6)15N(2) [K1]; 1xLabel:13C(6)15N(4) [R31]	0.0501118	0.00397277	1	1	3	Q6IAA8	Q6IAA8 [104-134]		1	3428.85								3180	Redundant	Heavy	Not Found	High	High	4.24	0.003158	0.03679	3.63
	TRUE	High	[R].IAAYAYSALSQIR.[V]		2.26335e-05	9.84928e-05	1	1	2	Q6IAA8	Q6IAA8 [135-147]		0	1426.77	0.923	0.601065	0	104	96	3.57026e+07	2.53089e+07	3274		Light	High	Peak Found	High	0.46	0.0001206	1.665e-05	2.98	51.63
	TRUE	High	[R].IAAYAYSALSQIR.[V]	1xLabel:13C(6)15N(4) [R13]	7.06249e-06	9.84928e-05	1	1	2	Q6IAA8	Q6IAA8 [135-147]		0	1436.78								3274	Redundant	Heavy	Peak Found	High	High	0.56	0.0001206	5.09e-06	3.05	51.63
	TRUE	High	[R].LAVLSSSLTHWK.[K]		4.12717e-06	9.84928e-05	1	1	6	Q6IAA8	Q6IAA8 [92-103]		0	1341.75								3397	Redundant	Light	High	Peak Found	High	-0.16	0.0001206	2.952e-06	1.6	45.95
	TRUE	High	[R].LAVLSSSLTHWK.[K]	1xLabel:13C(6)15N(2) [K12]	6.01551e-06	9.84928e-05	1	1	4	Q6IAA8	Q6IAA8 [92-103]		0	1349.77	1.052	0.927097	0	97.4	102.6	33460877	27045057	3397		Heavy	Peak Found	High	High	0.36	0.0001206	4.331e-06	2.55	45.95
	TRUE	High	[K].LLLDPSSPPTK.[A]		0.0122753	0.00137984	1	1	1	Q6IAA8	Q6IAA8 [21-31]		0	1167.66	0.681	0.0512893	0	119	81	25412020	13284542	4008		Light	High	Peak Found	High	-0.34	0.001254	0.009751	2.93	32.7
	TRUE	High	[K].LLLDPSSPPTK.[A]	1xLabel:13C(6)15N(2) [K11]	0.0927654	0.00653526	1	1	1	Q6IAA8	Q6IAA8 [21-31]		0	1175.68								4008	Redundant	Heavy	Peak Found	High	High	0.78	0.005054	0.06758	2.05	32.7
	TRUE	High	[K].LPPLPSLTSQPHQVLASEPIPFSDLQQVSR.[I]		3.03491e-09	9.84928e-05	1	1	3	Q6IAA8	Q6IAA8 [105-134]		0	3281.75	0.405	8.1177e-05	0	142.3	57.7	1.00785e+07	3.13551e+06	4299		Light	High	Peak Found	High	-0.49	0.0001206	1.922e-09	5.99	71.94
	TRUE	High	[K].LPPLPSLTSQPHQVLASEPIPFSDLQQVSR.[I]	1xLabel:13C(6)15N(4) [R30]	1.51056e-05	9.84928e-05	1	1	1	Q6IAA8	Q6IAA8 [105-134]		0	3291.76								4299	Redundant	Heavy	Peak Found	High	High	1.26	0.0001206	1.099e-05	5.29	71.94
	TRUE	High	[K].TASNIIDVSAADSQGMEQHEYMDR.[A]		2.85136e-06	9.84928e-05	1	1	3	Q6IAA8	Q6IAA8 [61-84]		0	2668.16								6965	Redundant	Light	High	Peak Found	High	-0.05	0.0001206	2.026e-06	4.84	44.43
	TRUE	High	[K].TASNIIDVSAADSQGMEQHEYMDR.[A]	1xLabel:13C(6)15N(4) [R24]	1.51056e-05	9.84928e-05	1	1	3	Q6IAA8	Q6IAA8 [61-84]		0	2678.17	0.938	0.653397	0	103.2	96.8	25247276	18181688	6965		Heavy	Peak Found	High	High	0.13	0.0001206	1.106e-05	4.3	44.43
	TRUE	High	[K].TASNIIDVSAADSQGMEQHEYMDR.[A]	1xOxidation [M]	7.36437e-06	9.84928e-05	1	1	6	Q6IAA8	Q6IAA8 [61-84]		0	2684.16								6963	Redundant	Light	High	Peak Found	High	-0.37	0.0001206	5.298e-06	5.05	39.87
	TRUE	High	[K].TASNIIDVSAADSQGMEQHEYMDR.[A]	1xDeamidated [Q]; 1xOxidation [M]	4.47936e-05	9.84928e-05	1	1	4	Q6IAA8	Q6IAA8 [61-84]		0	2685.14								6962	Redundant	Light	High	Not Found	High	4.42	0.0001206	3.341e-05	5.19
	TRUE	High	[K].TASNIIDVSAADSQGMEQHEYMDR.[A]	1xOxidation [M]; 1xLabel:13C(6)15N(4) [R24]	1.761e-05	9.84928e-05	1	1	5	Q6IAA8	Q6IAA8 [61-84]		0	2694.16	1	0.883653	0	100	100	30869242	23714782	6963		Heavy	Peak Found	High	High	0.92	0.0001206	1.286e-05	4.2	39.87
	TRUE	High	[K].TASNIIDVSAADSQGMEQHEYMDR.[A]	2xOxidation [M16; M22]	0.00031603	9.84928e-05	1	1	2	Q6IAA8	Q6IAA8 [61-84]		0	2700.15								6961	Redundant	Light	High	Peak Found	High	0.82	0.0001206	0.0002456	3.98	32.71
	TRUE	High	[K].TASNIIDVSAADSQGMEQHEYMDR.[A]	2xOxidation [M16; M22]; 1xLabel:13C(6)15N(4) [R24]	6.34229e-05	9.84928e-05	1	1	2	Q6IAA8	Q6IAA8 [61-84]		0	2710.16	0.89	0.437197	0	105.8	94.2	13023182	8897826	6961		Heavy	Peak Found	High	High	0.45	0.0001206	4.756e-05	4.12	32.71
	TRUE	High	[R].TDEQALLSSILAK.[T]		2.31282e-06	9.84928e-05	1	1	3	Q6IAA8	Q6IAA8 [48-60]		0	1388.76	0.988	0.837873	0	100.6	99.4	8.3576e+07	6.34118e+07	6982		Light	High	Peak Found	High	0.66	0.0001206	1.633e-06	4.8	63.3
	TRUE	High	[R].TDEQALLSSILAK.[T]	1xLabel:13C(6)15N(2) [K13]	4.0697e-07	9.84928e-05	1	1	4	Q6IAA8	Q6IAA8 [48-60]		0	1396.78								6982	Redundant	Heavy	Peak Found	High	High	0.18	0.0001206	2.799e-07	4.31	63.3
TRUE	High	Master Protein	P61225	Ras-related protein Rap-2b OS=Homo sapiens OX=9606 GN=RAP2B PE=1 SV=1	0	205.751	76	12	77	6	183	20.5	4.81	308.22	12	Pf00071	5912	ENSG00000181467	RAP2B	hsa:5912; P17964; P61225; Q96EG5; Q9CXG0		Neutrophil degranulation		1	0	0.957	0.857437	6.51	105.1	94.9	5.59114e+07	3.87604e+07	High	High	1
	Checked	Confidence	Annotated Sequence	Modifications	Qvality PEP	Qvality q-value	# Protein Groups	# Proteins	# PSMs	Master Protein Accessions	Positions in Master Proteins	Modifications in Master Proteins	# Missed Cleavages	Theo. MH+ [Da]	Abundance Ratio: (Heavy) / (Light)	Abundance Ratio P-Value: (Heavy) / (Light)	Abundance Ratio Variability [%]: (Heavy) / (Light)	Abundances (Grouped): Light	Abundances (Grouped): Heavy	Abundance: F1: Light, Sample	Abundance: F1: Heavy, Sample	Precursor Quan Result ID	Quan Info	Quan Channel	Found in Sample: [S1] F1: Light, Sample	Found in Sample: [S3] F1: Heavy, Sample	Confidence (by Search Engine): Sequest HT	DeltaM [ppm] (by Search Engine): Sequest HT	Percolator q-Value (by Search Engine): Sequest HT	Percolator PEP (by Search Engine): Sequest HT	XCorr (by Search Engine): Sequest HT	Top Apex RT [min]
	TRUE	High	[K].ALAEEWSCPFMETSAK.[N]	1xCarbamidomethyl [C8]	0.000299308	9.84928e-05	1	1	2	P61225	P61225 [133-148]		0	1856.82								316	Redundant	Light	High	Peak Found	High	1.13	0.0001206	0.0002311	3.85	57.1
	TRUE	High	[K].ALAEEWSCPFMETSAK.[N]	1xCarbamidomethyl [C8]; 1xLabel:13C(6)15N(2) [K16]	2.73195e-05	9.84928e-05	1	1	1	P61225	P61225 [133-148]		0	1864.83	0.506	0.00362261	0	132.8	67.2	6572151	2.55292e+06	316		Heavy	Peak Found	High	High	0.39	0.0001206	2.016e-05	3.93	57.1
	TRUE	High	[K].ALAEEWSCPFMETSAK.[N]	1xCarbamidomethyl [C8]; 1xOxidation [M11]	9.75315e-05	9.84928e-05	1	1	1	P61225	P61225 [133-148]		0	1872.81								315	No Quan Values	Light	High	Not Found	High	-0.34	0.0001206	7.345e-05	3.75
	TRUE	High	[K].ASVDELFAEIVR.[Q]		2.27918e-05	9.84928e-05	1	1	2	P61225	P61225 [151-162]		0	1348.71	0.957	0.676176	0	102.2	97.8	12460885	9158438	700		Light	High	Peak Found	High	-0.52	0.0001206	1.679e-05	3.45	73.43
	TRUE	High	[K].ASVDELFAEIVR.[Q]	1xLabel:13C(6)15N(4) [R12]	2.36001e-05	9.84928e-05	1	1	2	P61225	P61225 [151-162]		0	1358.72								700	Redundant	Heavy	Peak Found	High	High	-0.4	0.0001206	1.734e-05	3.77	73.43
	TRUE	High	[K].EIEVDSSPSVLEILDTAGTEQFASMR.[D]		1.07331e-05	9.84928e-05	3	3	2	P10114; Q9Y3L5; P61225	P10114 [43-68]; Q9Y3L5 [43-68]; P61225 [43-68]		0	2824.36	0.787	0.467361	0	111.9	88.1	895308	541167	1798	Shared	Light	High	Peak Found	High	-0.22	0.0001206	7.794e-06	5.48	85.09
	TRUE	High	[K].EIEVDSSPSVLEILDTAGTEQFASMR.[D]	1xDeamidated [Q21]	0.000115168	9.84928e-05	3	3	3	P10114; Q9Y3L5; P61225	P10114 [43-68]; Q9Y3L5 [43-68]; P61225 [43-68]		0	2825.34								1799	No Quan Values	Light	High	Not Found	High	4.72	0.0001206	8.695e-05	4.36
	TRUE	High	[K].EIEVDSSPSVLEILDTAGTEQFASMR.[D]	1xLabel:13C(6)15N(4) [R26]	6.94185e-05	9.84928e-05	3	3	2	P10114; Q9Y3L5; P61225	P10114 [43-68]; Q9Y3L5 [43-68]; P61225 [43-68]		0	2834.36								1798	Redundant	Heavy	Peak Found	High	High	0.11	0.0001206	5.187e-05	3.62	85.09
	TRUE	High	[K].EIEVDSSPSVLEILDTAGTEQFASMR.[D]	1xOxidation [M25]	7.78511e-09	9.84928e-05	3	3	5	P10114; Q9Y3L5; P61225	P10114 [43-68]; Q9Y3L5 [43-68]; P61225 [43-68]		0	2840.35								1796	Redundant	Light	High	Peak Found	High	0.65	0.0001206	5.014e-09	7.88	79.68
	TRUE	High	[K].EIEVDSSPSVLEILDTAGTEQFASMR.[D]	1xOxidation [M25]; 1xLabel:13C(6)15N(4) [R26]	1.16672e-09	9.84928e-05	3	3	4	P10114; Q9Y3L5; P61225	P10114 [43-68]; Q9Y3L5 [43-68]; P61225 [43-68]		0	2850.36	0.786	0.262655	0	112	88	9.05265e+06	5.46338e+06	1796	Shared	Heavy	Peak Found	High	High	0.81	0.0001206	7.291e-10	7.66	79.68
	TRUE	High	[R].EYKVVVLGSGGVGK.[S]	2xLabel:13C(6)15N(2) [K3; K14]	0.0281041	0.00254153	3	3	1	P10114; Q9Y3L5; P61225	P10114 [3-16]; Q9Y3L5 [3-16]; P61225 [3-16]		1	1407.82	1.094	0.789346	0	95.5	104.5	6842682	5.74699e+06	2142	Shared	Heavy	Peak Found	High	High	-0.19	0.002134	0.02111	2.85	29.92
	TRUE	High	[R].KEIEVDSSPSVLEILDTAGTEQFASMR.[D]		1.1349e-05	9.84928e-05	3	3	2	P10114; Q9Y3L5; P61225	P10114 [42-68]; Q9Y3L5 [42-68]; P61225 [42-68]		1	2952.45	0.848	0.442897	0	108.2	91.8	3.13742e+06	2.04435e+06	3108	Shared	Light	High	Peak Found	High	0.16	0.0001206	8.247e-06	5.17	76.65
	TRUE	High	[R].KEIEVDSSPSVLEILDTAGTEQFASMR.[D]	1xOxidation [M26]	1.46901e-05	9.84928e-05	3	3	2	P10114; Q9Y3L5; P61225	P10114 [42-68]; Q9Y3L5 [42-68]; P61225 [42-68]		1	2968.45	100	1e-17			200		4.98278e+06	3110	Shared	Light	High	Peak Found	High	0.06	0.0001206	1.071e-05	5.21	71.26
	TRUE	High	[R].KEIEVDSSPSVLEILDTAGTEQFASMR.[D]	1xLabel:13C(6)15N(2) [K1]; 1xLabel:13C(6)15N(4) [R27]	2.24916e-06	9.84928e-05	3	3	2	P10114; Q9Y3L5; P61225	P10114 [42-68]; Q9Y3L5 [42-68]; P61225 [42-68]		1	2970.47								3108	Redundant	Heavy	Peak Found	High	High	-0.19	0.0001206	1.591e-06	6.1	76.65
	TRUE	High	[R].KEIEVDSSPSVLEILDTAGTEQFASMR.[D]	1xDeamidated [Q22]; 1xLabel:13C(6)15N(2) [K1]; 1xLabel:13C(6)15N(4) [R27]	0.00159112	0.000424254	3	3	2	P10114; Q9Y3L5; P61225	P10114 [42-68]; Q9Y3L5 [42-68]; P61225 [42-68]		1	2971.46								3109	Redundant	Heavy	Not Found	High	High	4.68	0.0003475	0.001312	3.88
	TRUE	High	[R].KEIEVDSSPSVLEILDTAGTEQFASMR.[D]	1xOxidation [M26]; 1xLabel:13C(6)15N(2) [K1]; 1xLabel:13C(6)15N(4) [R27]	3.71179e-05	9.84928e-05	3	3	2	P10114; Q9Y3L5; P61225	P10114 [42-68]; Q9Y3L5 [42-68]; P61225 [42-68]		1	2986.47								3110	Redundant	Heavy	Not Found	High	High	-0.54	0.0001206	2.745e-05	6.7	71.26
	TRUE	High	[K].NGQGFILVYSLVNQQSFQDIKPMR.[D]	1xOxidation [M23]	3.79015e-05	9.84928e-05	3	3	2	P10114; Q9Y3L5; P61225	P10114 [74-97]; Q9Y3L5 [74-97]; P61225 [74-97]		0	2798.43	0.895	0.574498	0	105.6	94.4	3.1291e+06	2.14968e+06	5552	Shared	Light	High	Peak Found	High	0.31	0.0001206	2.818e-05	4.5	73.06
	TRUE	High	[K].NGQGFILVYSLVNQQSFQDIKPMR.[D]	1xLabel:13C(6)15N(2) [K21]; 1xLabel:13C(6)15N(4) [R24]	0.000516372	0.00021741	3	3	1	P10114; Q9Y3L5; P61225	P10114 [74-97]; Q9Y3L5 [74-97]; P61225 [74-97]		0	2800.46	0.756	0.414534	0	113.9	86.1	793016	460477	5553	Shared	Heavy	Peak Found	High	High	-0.83	0.0002	0.0004075	3.57	76.36
	TRUE	High	[K].NGQGFILVYSLVNQQSFQDIKPMR.[D]	1xOxidation [M23]; 1xLabel:13C(6)15N(2) [K21]; 1xLabel:13C(6)15N(4) [R24]	0.000268402	9.84928e-05	3	3	2	P10114; Q9Y3L5; P61225	P10114 [74-97]; Q9Y3L5 [74-97]; P61225 [74-97]		0	2816.45								5552	Redundant	Heavy	Peak Found	High	High	-1.3	0.0001206	0.0002074	3.52	73.06
	TRUE	High	[K].NKASVDELFAEIVR.[Q]		1.54249e-05	9.84928e-05	1	1	3	P61225	P61225 [149-162]		1	1590.85								5571	Redundant	Light	High	Peak Found	High	-1.14	0.0001206	1.123e-05	4.67	63.96
	TRUE	High	[K].NKASVDELFAEIVR.[Q]	1xLabel:13C(6)15N(2) [K2]; 1xLabel:13C(6)15N(4) [R14]	1.6084e-05	9.84928e-05	1	1	3	P61225	P61225 [149-162]		1	1608.87	0.996	0.828643	0	100.2	99.8	1.2627e+07	9657305	5571		Heavy	Peak Found	High	High	0.5	0.0001206	1.177e-05	4	63.96
	TRUE	High	[K].SALTVQFVTGSFIEK.[Y]	1xLabel:13C(6)15N(2) [K15]	4.26635e-05	9.84928e-05	1	1	1	P61225	P61225 [17-31]		0	1634.89								6266	No Quan Values	Heavy	Not Found	High	High	-1.14	0.0001206	3.174e-05	3.09
	TRUE	High	[R].VPMILVGNKVDLEGER.[E]		3.5599e-05	9.84928e-05	1	1	3	P61225	P61225 [109-124]		1	1768.96	1.001	0.846662	0	100	100	12389285	9523693	8053		Light	High	Peak Found	High	0.33	0.0001206	2.637e-05	4.32	48.66
	TRUE	High	[R].VPMILVGNKVDLEGER.[E]	1xOxidation [M3]	1.68885e-05	9.84928e-05	1	1	2	P61225	P61225 [109-124]		1	1784.96								8052	Redundant	Light	High	Peak Found	High	-0.18	0.0001206	1.231e-05	2.66	42.16
	TRUE	High	[R].VPMILVGNKVDLEGER.[E]	1xLabel:13C(6)15N(2) [K9]; 1xLabel:13C(6)15N(4) [R16]	4.58227e-07	9.84928e-05	1	1	2	P61225	P61225 [109-124]		1	1786.99								8053	Redundant	Heavy	Peak Found	High	High	0.26	0.0001206	3.163e-07	4.35	48.66
	TRUE	High	[R].VPMILVGNKVDLEGER.[E]	1xOxidation [M3]; 1xLabel:13C(6)15N(2) [K9]; 1xLabel:13C(6)15N(4) [R16]	0.00164398	0.000424254	1	1	2	P61225	P61225 [109-124]		1	1802.98	0.864	0.361078	0	107.3	92.7	11862073	7868025	8052		Heavy	Peak Found	High	High	0.36	0.0003475	0.001356	3	42.16
	TRUE	High	[K].YDPTIEDFYR.[K]	1xLabel:13C(6)15N(4) [R10]	0.00070064	0.00021741	3	3	2	P10114; Q9Y3L5; P61225	P10114 [32-41]; Q9Y3L5 [32-41]; P61225 [32-41]		0	1328.6	0.859	0.388664	0	107.6	92.4	38043900	25084358	8346	Shared	Heavy	Peak Found	High	High	0.06	0.0002	0.0005599	2.06	49.63
	TRUE	High	[K].YDPTIEDFYRK.[E]		0.00511233	0.000965695	3	3	1	P10114; Q9Y3L5; P61225	P10114 [32-42]; Q9Y3L5 [32-42]; P61225 [32-42]		1	1446.69								8347	Redundant	Light	High	Peak Found	High	-0.25	0.0008827	0.004245	1.36	39.55
	TRUE	High	[K].YDPTIEDFYRK.[E]	1xLabel:13C(6)15N(2) [K11]; 1xLabel:13C(6)15N(4) [R10]	0.00109615	0.000339819	3	3	1	P10114; Q9Y3L5; P61225	P10114 [32-42]; Q9Y3L5 [32-42]; P61225 [32-42]		1	1464.71	0.882	0.460664	0	106.3	93.7	75533312	51142640	8347	Shared	Heavy	Peak Found	High	High	0.63	0.0002	0.0008902	2.64	39.55
	TRUE	High	[R].YERVPMILVGNKVDLEGER.[E]	1xOxidation [M6]	0.0038731	0.00071665	1	1	1	P61225	P61225 [106-124]		2	2233.16								8369	No Quan Values	Light	High	Not Found	High	-0.46	0.0007168	0.003249	3.77
TRUE	High	Master Protein	P55072	Transitional endoplasmic reticulum ATPase OS=Homo sapiens OX=9606 GN=VCP PE=1 SV=4	0	195.937	34	20	60	20	806	89.3	5.26	208.35	20	Pf00004, Pf02359, Pf02933, Pf09336, Pf17862	7415	ENSG00000165280	VCP	B2R5T8; hsa:7415; P55072; Q0V924; Q2TAI5; Q969G7; Q9UCD5		Aggrephagy; Neutrophil degranulation; ABC-family proteins mediated transport; Hedgehog ligand biogenesis; Hh mutants are degraded by ERAD; Defective CFTR causes cystic fibrosis; RHOH GTPase cycle; Ovarian tumor domain proteases; HSF1 activation; Translesion Synthesis by POLH; E3 ubiquitin ligases ubiquitinate target proteins; Attachment and Entry; Attachment and Entry; Josephin domain DUBs; Prote…	Protein processing in endoplasmic reticulum; Amyotrophic lateral sclerosis; Pathways of neurodegeneration; Legionellosis	20	0	1.026	0.924377	26.3	100	100	9.20426e+07	7.07123e+07	High	High	1	Met-loss+Acetyl [N-Term]
	Checked	Confidence	Annotated Sequence	Modifications	Qvality PEP	Qvality q-value	# Protein Groups	# Proteins	# PSMs	Master Protein Accessions	Positions in Master Proteins	Modifications in Master Proteins	# Missed Cleavages	Theo. MH+ [Da]	Abundance Ratio: (Heavy) / (Light)	Abundance Ratio P-Value: (Heavy) / (Light)	Abundance Ratio Variability [%]: (Heavy) / (Light)	Abundances (Grouped): Light	Abundances (Grouped): Heavy	Abundance: F1: Light, Sample	Abundance: F1: Heavy, Sample	Precursor Quan Result ID	Quan Info	Quan Channel	Found in Sample: [S1] F1: Light, Sample	Found in Sample: [S3] F1: Heavy, Sample	Confidence (by Search Engine): Sequest HT	DeltaM [ppm] (by Search Engine): Sequest HT	Percolator q-Value (by Search Engine): Sequest HT	Percolator PEP (by Search Engine): Sequest HT	XCorr (by Search Engine): Sequest HT	Top Apex RT [min]
	TRUE	High	[R].AVANETGAFFFLINGPEIMSK.[L]	1xOxidation [M19]	0.000673385	0.00021741	1	1	2	P55072	P55072 [257-277]		0	2272.13								767	No Quan Values	Light	High	Not Found	High	-1.75	0.0002	0.0005375	3.37
	TRUE	High	[R].AVANETGAFFFLINGPEIMSK.[L]	1xDeamidated [N4]; 1xOxidation [M19]	0.000422518	9.84928e-05	1	1	1	P55072	P55072 [257-277]		0	2273.12								768	No Quan Values	Light	High	Not Found	High	-1.76	0.0001206	0.0003316	2.92
	TRUE	High	[K].DVDLEFLAK.[M]	1xLabel:13C(6)15N(2) [K9]	0.00105387	0.00021741	1	1	1	P55072	P55072 [669-677]		0	1057.57	1.253	0.445637	0	88.8	111.2	4533971	4362940	1368		Heavy	Peak Found	High	High	0.15	0.0002	0.0008526	2.1	55.46
	TRUE	High	[R].ERQTNPSAMEVEEDDPVPEIR.[R]		4.93771e-05	9.84928e-05	1	1	1	P55072	P55072 [712-732]		1	2441.12								2005	No Quan Values	Light	High	Not Found	High	1.22	0.0001206	3.667e-05	3.76
	TRUE	High	[R].EVDIGIPDATGR.[L]		9.35582e-05	9.84928e-05	1	1	1	P55072	P55072 [366-377]		0	1242.63	1.041	0.966558	0	98	102	17004754	13599517	2090		Light	High	Peak Found	High	0.48	0.0001206	7.03e-05	3.85	39.21
	TRUE	High	[R].EVDIGIPDATGR.[L]	1xLabel:13C(6)15N(4) [R12]	0.0063868	0.000965695	1	1	1	P55072	P55072 [366-377]		0	1252.64								2090	Redundant	Heavy	Peak Found	High	High	0.6	0.0008827	0.005284	2.53	39.21
	TRUE	High	[R].GFGSFRFPSGNQGGAGPSQGSGGGTGGSVYTEDNDDDLYG.[-]		1.07349e-06	9.84928e-05	1	1	1	P55072	P55072 [767-806]		1	3871.63								2519	Redundant	Light	High	Not Found	High	1.05	0.0001206	7.52e-07	6.15
	TRUE	High	[R].GFGSFRFPSGNQGGAGPSQGSGGGTGGSVYTEDNDDDLYG.[-]	1xDeamidated [N34]; 1xLabel:13C(6)15N(4) [R6]	0.00460187	0.00081157	1	1	1	P55072	P55072 [767-806]		1	3882.63								2520	No Quan Values	Heavy	Not Found	High	High	2.91	0.0007817	0.003831	6.33
	TRUE	High	[R].GILLYGPPGTGK.[T]		0.00129097	0.000339819	1	1	1	P55072	P55072 [240-251]		0	1172.67	0.947	0.656153	0	102.7	97.3	13190066	9590632	2682		Light	High	Peak Found	High	-0.17	0.0002891	0.001055	3.17	41.94
	TRUE	High	[R].GILLYGPPGTGK.[T]	1xLabel:13C(6)15N(2) [K12]	0.000374305	9.84928e-05	1	1	1	P55072	P55072 [240-251]		0	1180.68								2682	Redundant	Heavy	Peak Found	High	High	0.01	0.0001206	0.0002918	3.15	41.94
	TRUE	High	[K].GPELLTMWFGESEANVR.[E]	1xOxidation [M7]; 1xLabel:13C(6)15N(4) [R17]	0.000778713	0.00021741	1	1	1	P55072	P55072 [544-560]		0	1961.93								2761	No Quan Values	Heavy	Not Found	High	High	2.61	0.0002	0.0006212	3.55
	TRUE	High	[R].LDQLIYIPLPDEK.[S]		0.00338152	0.00071665	1	1	2	P55072	P55072 [639-651]		0	1556.86	0.844	0.412193	0	108.5	91.5	4354798	2.82241e+06	3463		Light	High	Peak Found	High	-0.53	0.0006511	0.002834	2.74	67.07
	TRUE	High	[R].LDQLIYIPLPDEK.[S]	1xLabel:13C(6)15N(2) [K13]	2.46079e-05	9.84928e-05	1	1	2	P55072	P55072 [639-651]		0	1564.87								3463	Redundant	Heavy	Peak Found	High	High	0	0.0001206	1.805e-05	4.05	67.07
	TRUE	High	[R].LIVDEAINEDNSVVSLSQPK.[M]		0.00019859	9.84928e-05	1	1	2	P55072	P55072 [26-45]		0	2170.12	0.979	0.770653	0	101.1	98.9	1.0245e+07	7.70031e+06	4128		Light	High	Peak Found	High	-1.09	0.0001206	0.0001519	4.45	56.03
	TRUE	High	[R].LIVDEAINEDNSVVSLSQPK.[M]	1xLabel:13C(6)15N(2) [K20]	1.30494e-07	9.84928e-05	1	1	1	P55072	P55072 [26-45]		0	2178.14								4128	Redundant	Heavy	Peak Found	High	High	-0.32	0.0001206	8.804e-08	4.57	56.03
	TRUE	High	[R].IVSQLLTLMDGLK.[Q]		6.49539e-07	9.84928e-05	1	1	2	P55072	P55072 [324-336]		0	1430.83	1.118	0.735123	0	94.4	105.6	1.01843e+06	874788	4734		Light	High	Peak Found	High	-0.1	0.0001206	4.499e-07	4.08	79.67
	TRUE	High	[R].IVSQLLTLMDGLK.[Q]	1xLabel:13C(6)15N(2) [K13]	1.43905e-06	9.84928e-05	1	1	2	P55072	P55072 [324-336]		0	1438.84								4734	Redundant	Heavy	Peak Found	High	High	0.47	0.0001206	1.009e-06	3.73	79.67
	TRUE	High	[-].MASGADSKGDDLSTAILK.[Q]	1xMet-loss+Acetyl [N-Term]	1.91568e-06	9.84928e-05	1	1	2	P55072	P55072 [1-18]	P55072 1xMet-loss+Acetyl [N-Term]	1	1690.85	1.209	0.459733	0	90.6	109.4	21705112	20146024	4969		Light	High	Peak Found	High	-0.09	0.0001206	1.348e-06	4.59	40.67
	TRUE	High	[K].MDELQLFR.[G]	1xOxidation [M1]; 1xLabel:13C(6)15N(4) [R8]	0.00226776	0.000424254	1	1	2	P55072	P55072 [46-53]		0	1077.53	1.298	0.411831	0	87	113	3.00997e+06	3000155	5020		Heavy	Peak Found	High	High	0.66	0.0003475	0.001884	2.59	44.34
	TRUE	High	[K].NAPAIIFIDELDAIAPK.[R]		2.58531e-08	9.84928e-05	1	1	5	P55072	P55072 [296-312]		0	1810.99	0.764	0.370318	0	113.4	86.6	1.32296e+06	776602	5446		Light	High	Peak Found	High	0.55	0.0001206	1.696e-08	4.36	87.02
	TRUE	High	[K].NAPAIIFIDELDAIAPK.[R]	1xLabel:13C(6)15N(2) [K17]	2.39429e-08	9.84928e-05	1	1	3	P55072	P55072 [296-312]		0	1819.01								5446	Redundant	Heavy	Peak Found	High	High	0.46	0.0001206	1.573e-08	4.84	87.02
	TRUE	High	[K].NAPAIIFIDELDAIAPKR.[E]		5.8499e-07	9.84928e-05	1	1	2	P55072	P55072 [296-313]		1	1967.1	0.816	0.470693	0	110.1	89.9	1.65653e+06	1.03862e+06	5448		Light	High	Peak Found	High	0.53	0.0001206	4.053e-07	4.56	77.87
	TRUE	High	[K].NAPAIIFIDELDAIAPKR.[E]	1xLabel:13C(6)15N(2) [K17]; 1xLabel:13C(6)15N(4) [R18]	0.00155008	0.000424254	1	1	2	P55072	P55072 [296-313]		1	1985.12								5448	Redundant	Heavy	Peak Found	High	High	0.16	0.0003475	0.001271	1.35	77.87
	TRUE	High	[R].QAAPCVLFFDELDSIAK.[A]	1xCarbamidomethyl [C5]	0.00177826	0.000424254	1	1	1	P55072	P55072 [568-584]		0	1923.95								5834	No Quan Values	Light	High	Not Found	High	0.66	0.0003475	0.001467	2.72
	TRUE	High	[R].QTNPSAMEVEEDDPVPEIR.[R]		9.87131e-06	9.84928e-05	1	1	1	P55072	P55072 [714-732]		0	2155.98								6099	No Quan Values	Light	High	Not Found	High	-0.09	0.0001206	7.145e-06	3.54
	TRUE	High	[R].VINQILTEMDGMSTK.[K]		0.00027961	9.84928e-05	1	1	1	P55072	P55072 [600-614]		0	1679.83								7916	Redundant	Light	High	Not Found	High	0.77	0.0001206	0.0002154	3.49
	TRUE	High	[R].VINQILTEMDGMSTK.[K]	1xLabel:13C(6)15N(2) [K15]	1.07331e-05	9.84928e-05	1	1	1	P55072	P55072 [600-614]		0	1687.85								7916	No Quan Values	Heavy	Not Found	High	High	0.45	0.0001206	7.794e-06	3.87
	TRUE	High	[R].VINQILTEMDGMSTK.[K]	1xOxidation [M12]	0.00307794	0.000632611	1	1	1	P55072	P55072 [600-614]		0	1695.83								7915	No Quan Values	Light	High	Not Found	High	-2.54	0.0004992	0.002575	2.31
	TRUE	High	[R].VINQILTEMDGMSTK.[K]	2xOxidation [M9; M12]; 1xLabel:13C(6)15N(2) [K15]	4.67036e-05	9.84928e-05	1	1	1	P55072	P55072 [600-614]		0	1719.84								7914	No Quan Values	Heavy	Not Found	High	High	2.37	0.0001206	3.488e-05	3.23
	TRUE	High	[R].WALSQSNPSALR.[E]		0.000335922	9.84928e-05	1	1	1	P55072	P55072 [454-465]		0	1329.69	0.305	1.0183e-06	0	153.2	46.8	7.80157e+06	1.83025e+06	8250		Light	High	Peak Found	High	-0.73	0.0001206	0.0002604	2.33	37.53
	TRUE	High	[R].WALSQSNPSALR.[E]	1xDeamidated [Q5]	0.00572918	0.000965695	1	1	1	P55072	P55072 [454-465]		0	1330.67								8251	No Quan Values	Light	High	Not Found	High	-4.04	0.0008827	0.004757	2.64
	TRUE	High	[K].YEMFAQTLQQSR.[G]		0.000799528	0.00021741	1	1	1	P55072	P55072 [755-766]		0	1501.71	1.05	0.959096	0	97.6	102.4	4629531	3.73249e+06	8367		Light	High	Peak Found	High	-0.61	0.0002	0.0006411	2.8	41.64
	TRUE	High	[K].YEMFAQTLQQSR.[G]	1xOxidation [M3]	0.0233759	0.00204583	1	1	1	P55072	P55072 [755-766]		0	1517.71	1.026	0.986754	0	98.7	101.3	1.56986e+06	1.23754e+06	8366		Light	High	Peak Found	High	-0.55	0.001781	0.01769	2.2	31.53
	TRUE	High	[K].YEMFAQTLQQSR.[G]	1xOxidation [M3]; 1xLabel:13C(6)15N(4) [R12]	0.000179132	9.84928e-05	1	1	1	P55072	P55072 [755-766]		0	1527.71								8366	Redundant	Heavy	Peak Found	High	High	-2.37	0.0001206	0.0001365	2.84	31.53
TRUE	High	Master Protein	P08195	4F2 cell-surface antigen heavy chain OS=Homo sapiens OX=9606 GN=SLC3A2 PE=1 SV=3	0	194.404	32	18	60	18	630	68	5.01	239.71	18	Pf00128, Pf16028	6520	ENSG00000168003	SLC3A2	hsa:6520; P08195; Q13543	Ferroptosis; Proximal tubule transport; Malignant pleural mesothelioma	Amino acid transport across the plasma membrane; Tryptophan catabolism; Basigin interactions; Defective SLC7A7 causes lysinuric protein intolerance (LPI)	mTOR signaling pathway; Ferroptosis; Protein digestion and absorption	10	0	0.885	0.626535	9.6	103.9	96.1	1.56118e+08	1.10864e+08	High	High	1
[truncated: 13,369 more rows]

## Sheet: summary
procesisng steps
Result name: SonnyKomaniecki10445330_Foward_r					consensus steps
Result file: D:\PD 2.4\SILAC\SonnyKomaniecki10445330_Foward_r-(1).msf					Result name: SonnyKomaniecki10445330_Foward_r
[truncated: 208 more rows]
