# Supplementary material for: Cryo-EM structure revealed a novel F-actin binding motif in a Legionella pneumophila lysine fatty acyltransferase
Source: eLife. 2026 Jan 28;14:RP106975. doi: 10.7554/eLife.106975 (PMC12851578; doi:10.7554/eLife.106975)
Supplement: Supplementary file 4. [file elife-106975-supp4.xlsx]

## Sheet: Proteins
Checked	Protein FDR Confidence: Combined	Master	Accession	Description	Exp. q-value: Combined	Sum PEP Score	Coverage [%]	# Peptides	# PSMs	# Unique Peptides	# AAs	MW [kDa]	calc. pI	Score Sequest HT: Sequest HT	# Peptides (by Search Engine): Sequest HT	Pfam IDs	Entrez Gene ID	Ensembl Gene ID	Gene Symbol	Gene ID	WikiPathways	Reactome Pathways	KEGG Pathways	# Protein Pathway Groups	# Razor Peptides	Abundance Ratio: (Heavy) / (Light)	Abundance Ratio P-Value: (Heavy) / (Light)	Abundance Ratio Variability [%]: (Heavy) / (Light)	Abundances (Grouped): Light	Abundances (Grouped): Heavy	Abundance: F2: Light, Sample	Abundance: F2: Heavy, Sample	Found in Sample: [S2] F2: Light, Sample	Found in Sample: [S4] F2: Heavy, Sample	# Protein Groups	Modifications
TRUE	High	Master Protein	Q9UQ35	Serine/arginine repetitive matrix protein 2 OS=Homo sapiens OX=9606 GN=SRRM2 PE=1 SV=2	0	502.174	19	33	133	33	2752	299.4	12.06	484.44	33	Pf08312	23524	ENSG00000167978	SRRM2	A6NKB9; D3DU97; hsa:23524; O15038; O94803; Q6NSL3; Q6PIM3; Q6PK40; Q8IW17; Q96GY7; Q9P0G1; Q9UHA8; Q9UQ35; Q9UQ36; Q9UQ37; Q9UQ38; Q9UQ40		mRNA Splicing - Major Pathway		1	0	0.956	0.658456	14.83	104.1	95.9	2.08089e+08	1.5966e+08	High	High	1
	Checked	Confidence	Annotated Sequence	Modifications	Qvality PEP	Qvality q-value	# Protein Groups	# Proteins	# PSMs	Master Protein Accessions	Positions in Master Proteins	Modifications in Master Proteins	# Missed Cleavages	Theo. MH+ [Da]	Abundance Ratio: (Heavy) / (Light)	Abundance Ratio P-Value: (Heavy) / (Light)	Abundance Ratio Variability [%]: (Heavy) / (Light)	Abundances (Grouped): Light	Abundances (Grouped): Heavy	Abundance: F2: Light, Sample	Abundance: F2: Heavy, Sample	Precursor Quan Result ID	Quan Info	Quan Channel	Found in Sample: [S2] F2: Light, Sample	Found in Sample: [S4] F2: Heavy, Sample	Confidence (by Search Engine): Sequest HT	DeltaM [ppm] (by Search Engine): Sequest HT	Percolator q-Value (by Search Engine): Sequest HT	Percolator PEP (by Search Engine): Sequest HT	XCorr (by Search Engine): Sequest HT	Top Apex RT [min]
	TRUE	High	[R].AAFGISDSYVDGSSFDPQR.[R]		0.000676188	9.1126e-05	1	1	1	Q9UQ35	Q9UQ35 [137-155]		0	2018.91	1.067	0.831013	0	96.8	103.2	963860	855704	30		Light	High	Peak Found	High	0.75	0.0001192	0.0004064	3.11	56.54
	TRUE	High	[R].AAFGISDSYVDGSSFDPQR.[R]	1xLabel:13C(6)15N(4) [R19]	1.78612e-07	9.1126e-05	1	1	1	Q9UQ35	Q9UQ35 [137-155]		0	2028.92								30	Redundant	Heavy	Peak Found	High	High	-0.91	0.0001192	7.627e-08	4.74	56.54
	TRUE	High	[R].AAFGISDSYVDGSSFDPQRR.[A]		0.0496365	0.00311578	1	1	1	Q9UQ35	Q9UQ35 [137-156]		1	2175.01	1.136	0.7199	0	93.6	106.4	5.01227e+06	4.73875e+06	31		Light	High	Peak Found	High	0.87	0.002713	0.03551	2.68	50.92
	TRUE	High	[R].AAFGISDSYVDGSSFDPQRR.[A]	2xLabel:13C(6)15N(4) [R19; R20]	0.0943946	0.00644445	1	1	1	Q9UQ35	Q9UQ35 [137-156]		1	2195.03								31	Redundant	Heavy	Peak Found	High	High	-1.73	0.005368	0.07055	2.16	50.92
	TRUE	High	[K].AGMSSNQSISSPVLDAVPR.[T]		1.43598e-07	9.1126e-05	1	1	1	Q9UQ35	Q9UQ35 [1394-1412]		0	1915.95	0.98	0.812858	0	101	99	2.17439e+06	1.77339e+06	244		Light	High	Peak Found	High	-1.48	0.0001192	6.056e-08	3.92	48.17
	TRUE	High	[K].AGMSSNQSISSPVLDAVPR.[T]	1xLabel:13C(6)15N(4) [R19]	0.000351696	9.1126e-05	1	1	2	Q9UQ35	Q9UQ35 [1394-1412]		0	1925.96								244	Redundant	Heavy	Peak Found	High	High	0.12	0.0001192	0.0002059	3.6	48.17
	TRUE	High	[K].AGMSSNQSISSPVLDAVPR.[T]	1xOxidation [M3]	6.12458e-06	9.1126e-05	1	1	1	Q9UQ35	Q9UQ35 [1394-1412]		0	1931.95	0.787	0.286001	0	111.9	88.1	2.73071e+06	1.78754e+06	240		Light	High	Peak Found	High	1.48	0.0001192	3.029e-06	4.1	43.74
	TRUE	High	[K].AGMSSNQSISSPVLDAVPR.[T]	2xDeamidated [N6; Q7]; 1xOxidation [M3]	0.000421751	9.1126e-05	1	1	1	Q9UQ35	Q9UQ35 [1394-1412]		0	1933.92	0.01	1e-17		200		1.19565e+06		241		Light	High	Not Found	High	4.13	0.0001192	0.0002482	2.87	44.2
	TRUE	High	[K].AGMSSNQSISSPVLDAVPR.[T]	1xOxidation [M3]; 1xLabel:13C(6)15N(4) [R19]	4.29329e-08	9.1126e-05	1	1	1	Q9UQ35	Q9UQ35 [1394-1412]		0	1941.96								240	Redundant	Heavy	Peak Found	High	High	1.5	0.0001192	1.717e-08	4.34	43.74
	TRUE	High	[K].DVNPGGKEETPGQRPAVTETHQLAELNEK.[K]	1xDeamidated [Q22]; 2xLabel:13C(6)15N(2) [K7; K29]; 1xLabel:13C(6)15N(4) [R14]	0.000676188	9.1126e-05	1	1	1	Q9UQ35	Q9UQ35 [102-130]		1	3171.58								1194	Redundant	Heavy	Peak Found	High	High	4.31	0.0001192	0.0004065	3.65	29.72
	TRUE	High	[K].EDLNGPFLNQLETDPSLDMK.[E]		6.0983e-05	9.1126e-05	1	1	2	Q9UQ35	Q9UQ35 [1353-1372]		0	2276.08	0.961	0.90721	0	102	98	381036	304756	1335		Light	High	Peak Found	High	-0.05	0.0001192	3.312e-05	3.69	68.22
	TRUE	High	[K].EDLNGPFLNQLETDPSLDMK.[E]	1xLabel:13C(6)15N(2) [K20]	2.64227e-05	9.1126e-05	1	1	2	Q9UQ35	Q9UQ35 [1353-1372]		0	2284.09								1335	Redundant	Heavy	Peak Found	High	High	0.05	0.0001192	1.389e-05	4.23	68.22
	TRUE	High	[K].EDLNGPFLNQLETDPSLDMK.[E]	1xOxidation [M19]	1.17859e-05	9.1126e-05	1	1	1	Q9UQ35	Q9UQ35 [1353-1372]		0	2292.07								1337	Redundant	Light	High	Peak Found	High	1.94	0.0001192	5.991e-06	3.98	62.58
	TRUE	High	[K].EDLNGPFLNQLETDPSLDMK.[E]	1xOxidation [M19]; 1xLabel:13C(6)15N(2) [K20]	0.000543835	9.1126e-05	1	1	1	Q9UQ35	Q9UQ35 [1353-1372]		0	2300.08	0.985	0.979726	0	100.7	99.3	513208	420713	1337		Heavy	Peak Found	High	High	1.29	0.0001192	0.000325	3.35	62.58
	TRUE	High	[K].EETPGQRPAVTETHQLAELNEK.[K]		7.21767e-07	9.1126e-05	1	1	1	Q9UQ35	Q9UQ35 [109-130]		0	2477.23	0.948	0.812764	0	102.7	97.3	1.3649e+06	1.07686e+06	1432		Light	High	Peak Found	High	0.22	0.0001192	3.27e-07	4.37	28.14
	TRUE	High	[K].EETPGQRPAVTETHQLAELNEK.[K]	1xLabel:13C(6)15N(2) [K22]; 1xLabel:13C(6)15N(4) [R7]	7.42137e-05	9.1126e-05	1	1	1	Q9UQ35	Q9UQ35 [109-130]		0	2495.25								1432	Redundant	Heavy	Peak Found	High	High	-1.82	0.0001192	4.059e-05	4.22	28.14
	TRUE	High	[K].ELSNSPLRENSFGSPLEFR.[N]		0.0162528	0.00141682	1	1	1	Q9UQ35	Q9UQ35 [1316-1334]		1	2179.08								1596	No Quan Values	Light	High	Not Found	High	-0.74	0.001212	0.01103	3.37
	TRUE	High	[R].ENSFGSPLEFR.[N]		0.0121472	0.00122778	1	1	1	Q9UQ35	Q9UQ35 [1324-1334]		0	1282.61	0.95	0.681371	0	102.6	97.4	3.60345e+06	2.84892e+06	1648		Light	High	Peak Found	High	0.05	0.001157	0.008175	2.46	47.89
	TRUE	High	[R].ENSFGSPLEFR.[N]	1xLabel:13C(6)15N(4) [R11]	0.0147166	0.00130832	1	1	1	Q9UQ35	Q9UQ35 [1324-1334]		0	1292.61								1648	Redundant	Heavy	Peak Found	High	High	-0.2	0.001212	0.009954	2.65	47.89
	TRUE	High	[K].EQNSALPTSSQDEELMEVVEK.[S]		1.70788e-05	9.1126e-05	1	1	2	Q9UQ35	Q9UQ35 [1224-1244]		0	2363.09	0.983	0.887531	0	100.8	99.2	2.60573e+06	2.13241e+06	1687		Light	High	Peak Found	High	0.66	0.0001192	8.833e-06	3.71	58.02
	TRUE	High	[K].EQNSALPTSSQDEELMEVVEK.[S]	1xLabel:13C(6)15N(2) [K21]	0.000113976	9.1126e-05	1	1	2	Q9UQ35	Q9UQ35 [1224-1244]		0	2371.11								1687	Redundant	Heavy	Peak Found	High	High	1.15	0.0001192	6.378e-05	3.33	58.02
	TRUE	High	[K].EQNSALPTSSQDEELMEVVEK.[S]	1xOxidation [M16]	3.6921e-05	9.1126e-05	1	1	2	Q9UQ35	Q9UQ35 [1224-1244]		0	2379.09								1686	No Quan Values	Light	High	Not Found	High	-0.23	0.0001192	1.962e-05	3.42
	TRUE	High	[K].EQNSALPTSSQDEELMEVVEK.[S]	1xOxidation [M16]; 1xLabel:13C(6)15N(2) [K21]	0.000291144	9.1126e-05	1	1	2	Q9UQ35	Q9UQ35 [1224-1244]		0	2387.1								1686	Redundant	Heavy	Not Found	High	High	-1.25	0.0001192	0.0001689	3.36
	TRUE	High	[R].FQSDSSSYPTVDSNSLLGQSR.[L]		3.27025e-09	9.1126e-05	1	1	3	Q9UQ35	Q9UQ35 [1138-1158]		0	2275.05	1.1	0.807836	0	95.2	104.8	1.32802e+07	1.21584e+07	1958		Light	High	Peak Found	High	0.13	0.0001192	1.178e-09	5.13	47.12
	TRUE	High	[R].FQSDSSSYPTVDSNSLLGQSR.[L]	1xLabel:13C(6)15N(4) [R21]	1.24298e-09	9.1126e-05	1	1	3	Q9UQ35	Q9UQ35 [1138-1158]		0	2285.06								1958	Redundant	Heavy	Peak Found	High	High	-0.28	0.0001192	4.296e-10	5.26	47.12
	TRUE	High	[R].GEFSASPMLK.[S]		0.123784	0.00877197	1	1	1	Q9UQ35	Q9UQ35 [1119-1128]		0	1066.52	1.191	0.564561	0	91.3	108.7	4599821	4557439	2122		Light	High	Peak Found	High	-0.71	0.007193	0.09438	2.23	32.11
	TRUE	High	[R].GEGDAPFSEPGTTSTQRPSSPETATK.[Q]		5.61269e-06	9.1126e-05	1	1	1	Q9UQ35	Q9UQ35 [304-329]		0	2635.21	0.692	0.0664881	0	118.2	81.8	4282302	2.46623e+06	2127		Light	High	Peak Found	High	-1.31	0.0001192	2.77e-06	3.01	25.74
	TRUE	High	[R].GEGDAPFSEPGTTSTQRPSSPETATK.[Q]	1xLabel:13C(6)15N(2) [K26]; 1xLabel:13C(6)15N(4) [R17]	3.45817e-05	9.1126e-05	1	1	1	Q9UQ35	Q9UQ35 [304-329]		0	2653.23								2127	Redundant	Heavy	Peak Found	High	High	1.42	0.0001192	1.838e-05	3.52	25.74
	TRUE	High	[R].HGGSPQPLATTPLSQEPVNPPSEASPTR.[D]		6.006e-10	9.1126e-05	1	1	2	Q9UQ35	Q9UQ35 [374-401]		0	2852.42	0.01	1e-17		200		5.22169e+06		2564		Light	High	Not Found	High	-1.36	0.0001192	2.008e-10	6.69	39.94
	TRUE	High	[R].HGGSPQPLATTPLSQEPVNPPSEASPTR.[D]	1xLabel:13C(6)15N(4) [R28]	6.85939e-07	9.1126e-05	1	1	1	Q9UQ35	Q9UQ35 [374-401]		0	2862.43								2564	Redundant	Heavy	Peak Found	High	High	-0.3	0.0001192	3.097e-07	5.98	39.94
	TRUE	High	[R].IPAASAAAMNLASAR.[T]		5.14359e-06	9.1126e-05	1	1	1	Q9UQ35	Q9UQ35 [2232-2246]		0	1414.75	1.005	0.812774	0	99.7	100.3	5.96484e+06	4989207	3583		Light	High	Peak Found	High	-0.19	0.0001192	2.52e-06	3.34	40.29
	TRUE	High	[R].IPAASAAAMNLASAR.[T]	1xLabel:13C(6)15N(4) [R15]	5.58866e-05	9.1126e-05	1	1	1	Q9UQ35	Q9UQ35 [2232-2246]		0	1424.76								3583	Redundant	Heavy	Peak Found	High	High	0.18	0.0001192	3.026e-05	2.48	40.29
	TRUE	High	[R].IPAASAAAMNLASAR.[T]	1xOxidation [M9]	2.84161e-05	9.1126e-05	1	1	1	Q9UQ35	Q9UQ35 [2232-2246]		0	1430.74	0.848	0.296726	0	108.2	91.8	5.36842e+06	3.78984e+06	3584		Light	High	Peak Found	High	0.52	0.0001192	1.495e-05	3.03	31.55
	TRUE	High	[R].IPAASAAAMNLASAR.[T]	1xOxidation [M9]; 1xLabel:13C(6)15N(4) [R15]	0.000114808	9.1126e-05	1	1	1	Q9UQ35	Q9UQ35 [2232-2246]		0	1440.75								3584	Redundant	Heavy	Peak Found	High	High	0.63	0.0001192	6.414e-05	3.54	31.55
	TRUE	High	[R].MAPALSGANLTSPR.[V]		0.000764989	9.1126e-05	1	1	1	Q9UQ35	Q9UQ35 [2371-2384]		0	1385.72	0.935	0.565156	0	103.3	96.7	7.09303e+06	5520190	4168		Light	High	Peak Found	High	0.59	0.0001192	0.0004643	2.93	34.44
	TRUE	High	[R].MAPALSGANLTSPR.[V]	1xLabel:13C(6)15N(4) [R14]	0.000132779	9.1126e-05	1	1	1	Q9UQ35	Q9UQ35 [2371-2384]		0	1395.73								4168	Redundant	Heavy	Peak Found	High	High	0.43	0.0001192	7.464e-05	2.88	34.44
	TRUE	High	[R].MAPALSGANLTSPR.[V]	1xOxidation [M1]	6.25969e-06	9.1126e-05	1	1	3	Q9UQ35	Q9UQ35 [2371-2384]		0	1401.72								4169	Redundant	Light	High	Peak Found	High	0.43	0.0001192	3.108e-06	3.4	29.53
	TRUE	High	[R].MAPALSGANLTSPR.[V]	1xOxidation [M1]; 1xLabel:13C(6)15N(4) [R14]	0.00128945	9.1126e-05	1	1	2	Q9UQ35	Q9UQ35 [2371-2384]		0	1411.72	1.101	0.738278	0	95.2	104.8	2.95945e+06	2710233	4169		Heavy	Peak Found	High	High	-0.16	0.0001192	0.000799	2.95	29.53
	TRUE	High	[R].MGQAPSQSLLPPAQDQPR.[S]	1xLabel:13C(6)15N(4) [R18]	0.0001952	9.1126e-05	1	1	1	Q9UQ35	Q9UQ35 [2431-2448]		0	1930.97	0.197	5.72875e-14	0	167.1	32.9	6.22072e+06	1.01978e+06	4324		Heavy	Peak Found	High	High	0.23	0.0001192	0.0001115	2.57	36.53
	TRUE	High	[R].MGQAPSQSLLPPAQDQPR.[S]	1xOxidation [M1]	2.22165e-07	9.1126e-05	1	1	2	Q9UQ35	Q9UQ35 [2431-2448]		0	1936.95								4326	No Quan Values	Light	High	Not Found	High	-0.02	0.0001192	9.568e-08	4.21
	TRUE	High	[R].MGQAPSQSLLPPAQDQPR.[S]	1xOxidation [M1]; 1xLabel:13C(6)15N(4) [R18]	5.15899e-05	9.1126e-05	1	1	1	Q9UQ35	Q9UQ35 [2431-2448]		0	1946.96								4326	Redundant	Heavy	Not Found	High	High	0.94	0.0001192	2.788e-05	3.92
	TRUE	High	[R].MSQVPAPVPLMSLR.[T]		0.033294	0.0020598	1	1	1	Q9UQ35	Q9UQ35 [2208-2221]		0	1525.82								4502	Redundant	Light	High	Peak Found	High	-1.95	0.001844	0.02337	2.41	59.58
	TRUE	High	[R].MSQVPAPVPLMSLR.[T]	1xLabel:13C(6)15N(4) [R14]	0.0143046	0.00130832	1	1	1	Q9UQ35	Q9UQ35 [2208-2221]		0	1535.83	0.859	0.38731	0	107.6	92.4	3.81454e+06	2.72713e+06	4502		Heavy	Peak Found	High	High	0.4	0.001212	0.009671	2.56	59.58
	TRUE	High	[R].MSQVPAPVPLMSLR.[T]	1xOxidation [M1]; 1xLabel:13C(6)15N(4) [R14]	0.0025081	0.000224419	1	1	1	Q9UQ35	Q9UQ35 [2208-2221]		0	1551.83	100	1e-17			200		1.8572e+06	4503		Heavy	Not Found	High	High	0.72	0.0002185	0.001594	2.66	55.65
	TRUE	High	[R].NSGPLGTEMNTGFSSEVK.[E]		1.70788e-05	9.1126e-05	1	1	1	Q9UQ35	Q9UQ35 [1335-1352]		0	1854.85	1.248	0.377621	0	89	111	2.50085e+06	2.59694e+06	4829		Light	High	Peak Found	High	-0.22	0.0001192	8.791e-06	3.81	44.13
	TRUE	High	[R].NSGPLGTEMNTGFSSEVK.[E]	1xLabel:13C(6)15N(2) [K18]	0.00171011	0.000224419	1	1	1	Q9UQ35	Q9UQ35 [1335-1352]		0	1862.87								4829	Redundant	Heavy	Peak Found	High	High	-0.69	0.0002185	0.001066	2.27	44.13
	TRUE	High	[R].NSGPLGTEMNTGFSSEVK.[E]	1xOxidation [M9]	2.87778e-08	9.1126e-05	1	1	1	Q9UQ35	Q9UQ35 [1335-1352]		0	1870.85								4828	Redundant	Light	High	Peak Found	High	-1.31	0.0001192	1.132e-08	4.77	34.08
	TRUE	High	[R].NSGPLGTEMNTGFSSEVK.[E]	1xOxidation [M9]; 1xLabel:13C(6)15N(2) [K18]	2.6759e-08	9.1126e-05	1	1	1	Q9UQ35	Q9UQ35 [1335-1352]		0	1878.86	1.214	0.484977	0	90.3	109.7	1.94033e+06	1.96013e+06	4828		Heavy	Peak Found	High	High	-0.93	0.0001192	1.055e-08	4.35	34.08
	TRUE	High	[R].QGSITSPQANEQSVTPQRR.[S]		0.0496365	0.00311578	1	1	1	Q9UQ35	Q9UQ35 [852-870]		1	2084.05	100	1e-17			200		387473	4995		Light	High	Peak Found	High	-0.16	0.002713	0.03558	2.45	17.31
	TRUE	High	[K].SEEPAGQILSHLSSELK.[E]		0.0776998	0.00506846	1	1	1	Q9UQ35	Q9UQ35 [1245-1261]		0	1824.93	1.042	0.920837	0	98	102	3.11828e+06	2.70297e+06	5352		Light	High	Peak Found	High	-0.49	0.004254	0.05735	1.76	60.29
	TRUE	High	[R].SGSSQELDVKPSASPQER.[S]		0.000119059	9.1126e-05	1	1	1	Q9UQ35	Q9UQ35 [1539-1556]		0	1901.92	0.903	0.695578	0	105.1	94.9	972248	730884	5465		Light	High	Peak Found	High	1.07	0.0001192	6.662e-05	2.79	16.87
	TRUE	High	[R].SGSSQELDVKPSASPQER.[S]	1xLabel:13C(6)15N(2) [K10]; 1xLabel:13C(6)15N(4) [R18]	9.9704e-06	9.1126e-05	1	1	1	Q9UQ35	Q9UQ35 [1539-1556]		0	1919.94								5465	Redundant	Heavy	Peak Found	High	High	0.04	0.0001192	5.014e-06	3.51	16.87
	TRUE	High	[R].SPGMLEPLGSSR.[T]	1xLabel:13C(6)15N(4) [R12]	0.00273491	0.000364742	1	1	1	Q9UQ35	Q9UQ35 [2132-2143]		0	1240.62	1.275	0.32881	0	87.9	112.1	2.07775e+06	2.20499e+06	5641		Heavy	Peak Found	High	High	-0.37	0.0003275	0.001742	2.53	34.31
	TRUE	High	[R].SPVPSAFSDQSR.[C]	1xLabel:13C(6)15N(4) [R12]	0.017079	0.00149171	1	1	1	Q9UQ35	Q9UQ35 [2449-2460]		0	1287.62	0.891	0.408816	0	105.8	94.2	6.26724e+06	4.64436e+06	5662		Heavy	Peak Found	High	High	0.15	0.001344	0.01158	1.96	25.55
	TRUE	High	[R].SSTGPEPPAPTPLLAER.[H]		1.15315e-05	9.1126e-05	1	1	2	Q9UQ35	Q9UQ35 [357-373]		0	1719.89	0.598	0.00210597	0	125.2	74.8	18536318	9222738	5774		Light	High	Peak Found	High	-0.18	0.0001192	5.84e-06	2.91	41.73
	TRUE	High	[R].SSTGPEPPAPTPLLAER.[H]	1xLabel:13C(6)15N(4) [R17]	3.61242e-05	9.1126e-05	1	1	2	Q9UQ35	Q9UQ35 [357-373]		0	1729.9								5774	Redundant	Heavy	Peak Found	High	High	-0.01	0.0001192	1.921e-05	3.75	41.73
	TRUE	High	[K].SSTPPGESYFGVSSLQLK.[G]		0.000118196	9.1126e-05	1	1	1	Q9UQ35	Q9UQ35 [1041-1058]		0	1883.94								5776	Redundant	Light	High	Peak Found	High	-1.16	0.0001192	6.638e-05	3.61	56.81
	TRUE	High	[K].SSTPPGESYFGVSSLQLK.[G]	1xLabel:13C(6)15N(2) [K18]	0.00103747	9.1126e-05	1	1	2	Q9UQ35	Q9UQ35 [1041-1058]		0	1891.95	1.014	0.996469	0	99.3	100.7	2.56161e+06	2.16065e+06	5776		Heavy	Peak Found	High	High	0.95	0.0001192	0.0006352	2.78	56.81
	TRUE	High	[R].TAAALAPASLTSAR.[M]		5.99239e-06	9.1126e-05	1	1	1	Q9UQ35	Q9UQ35 [2357-2370]		0	1300.72								5880	Redundant	Light	High	Peak Found	High	-0.3	0.0001192	2.962e-06	4	31.82
	TRUE	High	[R].TAAALAPASLTSAR.[M]	1xLabel:13C(6)15N(4) [R14]	0.0172004	0.00149171	1	1	1	Q9UQ35	Q9UQ35 [2357-2370]		0	1310.73	1.057	0.980723	0	97.2	102.8	17055378	14998534	5880		Heavy	Peak Found	High	High	0.11	0.001344	0.01167	2.6	31.82
	TRUE	High	[R].TAVAPSAVNLADPR.[T]		2.49292e-05	9.1126e-05	1	1	2	Q9UQ35	Q9UQ35 [2275-2288]		0	1381.74	0.912	0.438093	0	104.6	95.4	13682979	10388411	5926		Light	High	Peak Found	High	0.58	0.0001192	1.305e-05	2.93	33.56
	TRUE	High	[R].TAVAPSAVNLADPR.[T]	1xLabel:13C(6)15N(4) [R14]	0.000133748	9.1126e-05	1	1	1	Q9UQ35	Q9UQ35 [2275-2288]		0	1391.75								5926	Redundant	Heavy	Peak Found	High	High	-0.01	0.0001192	7.546e-05	2.84	33.56
	TRUE	High	[R].TPAAAAAMNLASPR.[T]	1xLabel:13C(6)15N(4) [R14]	7.45355e-06	9.1126e-05	1	1	1	Q9UQ35	Q9UQ35 [2261-2274]		0	1351.7	0.787	0.166164	0	111.9	88.1	5.76574e+06	3.77698e+06	6163		Heavy	Peak Found	High	High	-0.41	0.0001192	3.705e-06	3.86	34.34
	TRUE	High	[R].TPAAAAAMNLASPR.[T]	1xOxidation [M8]	3.78964e-06	9.1126e-05	1	1	2	Q9UQ35	Q9UQ35 [2261-2274]		0	1357.69								6162	Redundant	Light	High	Peak Found	High	-0.62	0.0001192	1.837e-06	3.63	23.43
	TRUE	High	[R].TPAAAAAMNLASPR.[T]	1xOxidation [M8]; 1xLabel:13C(6)15N(4) [R14]	5.49155e-06	9.1126e-05	1	1	1	Q9UQ35	Q9UQ35 [2261-2274]		0	1367.7	1.13	0.662925	0	93.9	106.1	2616260	2.45898e+06	6162		Heavy	Peak Found	High	High	0.75	0.0001192	2.699e-06	3.42	23.43
	TRUE	High	[R].TPAALAALSLTGSGTPPTAANYPSSSR.[T]		8.87509e-06	9.1126e-05	1	1	2	Q9UQ35	Q9UQ35 [2302-2328]		0	2559.3	0.508	0.000718948	0	132.7	67.3	5.4642e+06	2.30837e+06	6164		Light	High	Peak Found	High	0.22	0.0001192	4.456e-06	4.34	58.77
	TRUE	High	[R].TPAALAALSLTGSGTPPTAANYPSSSR.[T]	1xLabel:13C(6)15N(4) [R27]	9.13709e-06	9.1126e-05	1	1	2	Q9UQ35	Q9UQ35 [2302-2328]		0	2569.31								6164	Redundant	Heavy	Peak Found	High	High	-0.03	0.0001192	4.606e-06	3.61	58.77
	TRUE	High	[R].TPAIPTAVNLADSR.[T]		0.00155657	9.1126e-05	1	1	2	Q9UQ35	Q9UQ35 [2247-2260]		0	1425.77								6167	Redundant	Light	High	Peak Found	High	-0.2	0.0001192	0.0009719	3.19	43.24
	TRUE	High	[R].TPAIPTAVNLADSR.[T]	1xLabel:13C(6)15N(4) [R14]	2.83301e-06	9.1126e-05	1	1	1	Q9UQ35	Q9UQ35 [2247-2260]		0	1435.78	0.943	0.551626	0	102.9	97.1	14352489	11263408	6167		Heavy	Peak Found	High	High	-0.08	0.0001192	1.353e-06	2.96	43.24
	TRUE	High	[R].TPMSVLQQAGGSMMDGPGPR.[I]		9.8679e-07	9.1126e-05	1	1	1	Q9UQ35	Q9UQ35 [2144-2163]		0	2016.93								6189	No Quan Values	Light	High	Not Found	High	-0.07	0.0001192	4.507e-07	3.77
	TRUE	High	[R].TPMSVLQQAGGSMMDGPGPR.[I]	1xOxidation [M]	0.000222489	9.1126e-05	1	1	2	Q9UQ35	Q9UQ35 [2144-2163]		0	2032.92								6188	No Quan Values	Light	High	Not Found	High	-0.69	0.0001192	0.0001276	3.42
	TRUE	High	[R].TPQAPASANLVGPR.[S]		0.000306339	9.1126e-05	1	1	1	Q9UQ35	Q9UQ35 [2329-2342]		0	1378.74	0.893	0.37212	0	105.7	94.3	18007176	13380377	6199		Light	High	Peak Found	High	-0.34	0.0001192	0.0001789	2.41	26.33
	TRUE	High	[R].TPQAPASANLVGPR.[S]	1xLabel:13C(6)15N(4) [R14]	0.000463522	9.1126e-05	1	1	1	Q9UQ35	Q9UQ35 [2329-2342]		0	1388.75								6199	Redundant	Heavy	Peak Found	High	High	0.22	0.0001192	0.0002749	2.58	26.33
	TRUE	High	[R].TPTAPAVNLAGAR.[T]		0.00260024	0.000224419	1	1	1	Q9UQ35	Q9UQ35 [2289-2301]		0	1238.69	0.929	0.496787	0	103.7	96.3	12014123	9283505	6204		Light	High	Peak Found	High	0.81	0.0002185	0.001657	2.32	29.15
	TRUE	High	[R].TPTAPAVNLAGAR.[T]	1xLabel:13C(6)15N(4) [R13]	0.000327046	9.1126e-05	1	1	1	Q9UQ35	Q9UQ35 [2289-2301]		0	1248.69								6204	Redundant	Heavy	Peak Found	High	High	-0.55	0.0001192	0.0001905	2.09	29.15
TRUE	High	Master Protein	P02786	Transferrin receptor protein 1 OS=Homo sapiens OX=9606 GN=TFRC PE=1 SV=2	0	400.378	38	29	170	29	760	84.8	6.61	577.15	29	Pf02225, Pf04253, Pf04389	7037	ENSG00000072274	TFRC	D3DXB0; hsa:7037; P02786; Q1HE24; Q59G55; Q9UCN0; Q9UCU5; Q9UDF9; Q9UK21	Iron metabolism in placenta; Ferroptosis; 3q29 copy number variation syndrome	Golgi Associated Vesicle Biogenesis; RHOC GTPase cycle; RND2 GTPase cycle; RHOA GTPase cycle; CDC42 GTPase cycle; RAC1 GTPase cycle; RHOQ GTPase cycle; RHOG GTPase cycle; RAC2 GTPase cycle; RAC3 GTPase cycle; RHOB GTPase cycle; RHOJ GTPase cycle; RND1 GTPase cycle; Cargo recognition for clathrin-mediated endocytosis; Transferrin endocytosis and recycling; RHOH GTPase cycle	HIF-1 signaling pathway; Endocytosis; Phagosome; Ferroptosis; Hematopoietic cell lineage	25	0	1.034	0.984898	15.2	101.8	98.2	8.76758e+08	7.03938e+08	High	High	1
	Checked	Confidence	Annotated Sequence	Modifications	Qvality PEP	Qvality q-value	# Protein Groups	# Proteins	# PSMs	Master Protein Accessions	Positions in Master Proteins	Modifications in Master Proteins	# Missed Cleavages	Theo. MH+ [Da]	Abundance Ratio: (Heavy) / (Light)	Abundance Ratio P-Value: (Heavy) / (Light)	Abundance Ratio Variability [%]: (Heavy) / (Light)	Abundances (Grouped): Light	Abundances (Grouped): Heavy	Abundance: F2: Light, Sample	Abundance: F2: Heavy, Sample	Precursor Quan Result ID	Quan Info	Quan Channel	Found in Sample: [S2] F2: Light, Sample	Found in Sample: [S4] F2: Heavy, Sample	Confidence (by Search Engine): Sequest HT	DeltaM [ppm] (by Search Engine): Sequest HT	Percolator q-Value (by Search Engine): Sequest HT	Percolator PEP (by Search Engine): Sequest HT	XCorr (by Search Engine): Sequest HT	Top Apex RT [min]
	TRUE	High	[K].DENLALYVENQFR.[E]		2.40389e-05	9.1126e-05	1	1	3	P02786	P02786 [162-174]		0	1610.78								839	Redundant	Light	High	Peak Found	High	-0.37	0.0001192	1.257e-05	3.37	69.06
	TRUE	High	[K].DENLALYVENQFR.[E]	1xLabel:13C(6)15N(4) [R13]	5.45176e-06	9.1126e-05	1	1	2	P02786	P02786 [162-174]		0	1620.79	0.879	0.61313	0	106.5	93.5	1.34826e+06	985686	839		Heavy	Peak Found	High	High	-0.08	0.0001192	2.672e-06	3.84	69.06
	TRUE	High	[K].DSAQNSVIIVDK.[N]		3.28652e-05	9.1126e-05	1	1	2	P02786	P02786 [194-205]		0	1288.67								1121	Redundant	Light	High	Peak Found	High	0.75	0.0001192	1.747e-05	3.13	27.82
	TRUE	High	[K].DSAQNSVIIVDK.[N]	1xLabel:13C(6)15N(2) [K12]	3.42275e-06	9.1126e-05	1	1	2	P02786	P02786 [194-205]		0	1296.69	1.037	0.938294	0	98.2	101.8	18334642	15825319	1121		Heavy	Peak Found	High	High	-0.03	0.0001192	1.645e-06	3.41	27.82
	TRUE	High	[K].DSAQNSVIIVDKNGR.[L]		0.0064801	0.000694413	1	1	1	P02786	P02786 [194-208]		1	1615.84	1.034	0.94347	0	98.3	101.7	3081458	2.65225e+06	1122		Light	High	Peak Found	High	-0.36	0.0005813	0.004239	2.29	21.28
	TRUE	High	[K].DSAQNSVIIVDKNGR.[L]	1xLabel:13C(6)15N(2) [K12]; 1xLabel:13C(6)15N(4) [R15]	2.26802e-05	9.1126e-05	1	1	1	P02786	P02786 [194-208]		1	1633.86								1122	Redundant	Heavy	Peak Found	High	High	0.31	0.0001192	1.189e-05	3.49	21.28
	TRUE	High	[R].EAGSQKDENLALYVENQFR.[E]		4.69359e-05	9.1126e-05	1	1	3	P02786	P02786 [156-174]		1	2211.07	1.098	0.825317	0	95.3	104.7	8.73725e+06	7.98327e+06	1263		Light	High	Peak Found	High	0.06	0.0001192	2.522e-05	5.02	59
	TRUE	High	[R].EAGSQKDENLALYVENQFR.[E]	1xLabel:13C(6)15N(2) [K6]; 1xLabel:13C(6)15N(4) [R19]	1.83673e-05	9.1126e-05	1	1	2	P02786	P02786 [156-174]		1	2229.09								1263	Redundant	Heavy	Peak Found	High	High	-0.16	0.0001192	9.535e-06	5.14	59
	TRUE	High	[R].EEPGEDFPAAR.[R]	1xLabel:13C(6)15N(4) [R11]	0.037982	0.00255155	1	1	1	P02786	P02786 [110-120]		0	1227.55	0.786	0.111895	0	112	88	15614096	10206814	1424		Heavy	Peak Found	High	High	0.43	0.002293	0.02676	1.62	23.53
	TRUE	High	[K].GFVEPDHYVVVGAQR.[D]		2.2542e-07	9.1126e-05	1	1	4	P02786	P02786 [395-409]		0	1672.84	0.942	0.547302	0	103	97	5.48827e+07	4.30191e+07	2175		Light	High	Peak Found	High	0	0.0001192	9.67e-08	4.23	39.52
	TRUE	High	[K].GFVEPDHYVVVGAQR.[D]	1xLabel:13C(6)15N(4) [R15]	7.13527e-06	9.1126e-05	1	1	1	P02786	P02786 [395-409]		0	1682.85								2175	Redundant	Heavy	Peak Found	High	High	0.17	0.0001192	3.563e-06	4.25	39.52
	TRUE	High	[K].HPVTGQFLYQDSNWASK.[V]		0.000380961	9.1126e-05	1	1	1	P02786	P02786 [515-531]		0	1977.95	1.212	0.437543	0	90.4	109.6	2.04347e+06	2.06145e+06	2589		Light	High	Peak Found	High	1.39	0.0001192	0.0002239	3.31	45.04
	TRUE	High	[K].HPVTGQFLYQDSNWASK.[V]	1xLabel:13C(6)15N(2) [K17]	0.00200498	0.000224419	1	1	1	P02786	P02786 [515-531]		0	1985.96								2589	Redundant	Heavy	Peak Found	High	High	-1.39	0.0002185	0.001262	3.75	45.04
	TRUE	High	[R].HVFWGSGSHTLPALLENLK.[L]		0.000216113	9.1126e-05	1	1	2	P02786	P02786 [699-717]		0	2106.11	0.115	1.77636e-15	0	179.4	20.6	603797	57780.5	2615		Light	High	Peak Found	High	-0.29	0.0001192	0.0001244	4.14	71.65
	TRUE	High	[R].KLSEKLDSTDFTGTIK.[L]		0.119262	0.00841776	1	1	1	P02786	P02786 [130-145]		2	1782.95	1.156	0.685199	0	92.7	107.3	7112863	6844388	2720		Light	High	Peak Found	High	0.22	0.006924	0.09048	2.24	35.6
	TRUE	High	[R].KLSEKLDSTDFTGTIK.[L]	3xLabel:13C(6)15N(2) [K1; K5; K16]	0.00291828	0.000477939	1	1	2	P02786	P02786 [130-145]		2	1806.99								2720	Redundant	Heavy	Peak Found	High	High	0.36	0.0004125	0.001862	3.02	35.6
	TRUE	High	[K].LAQMFSDMVLK.[D]		0.000295407	9.1126e-05	1	1	2	P02786	P02786 [429-439]		0	1282.65	1.081	0.908242	0	96.1	103.9	6.20302e+06	5577358	2865		Light	High	Peak Found	High	0.1	0.0001192	0.0001722	3.13	59.01
	TRUE	High	[K].LAQMFSDMVLK.[D]	1xLabel:13C(6)15N(2) [K11]	2.88324e-05	9.1126e-05	1	1	2	P02786	P02786 [429-439]		0	1290.67								2865	Redundant	Heavy	Peak Found	High	High	0.36	0.0001192	1.519e-05	3.35	59.01
	TRUE	High	[K].LAQMFSDMVLK.[D]	1xOxidation [M8]	0.00320488	0.000477939	1	1	1	P02786	P02786 [429-439]		0	1298.65								2863	Redundant	Light	High	Peak Found	High	-1.47	0.0004125	0.002055	2.73	46.92
	TRUE	High	[K].LAQMFSDMVLK.[D]	1xOxidation [M]; 1xLabel:13C(6)15N(2) [K11]	0.000409671	9.1126e-05	1	1	2	P02786	P02786 [429-439]		0	1306.66	1.161	0.647461	0	92.6	107.4	4.91817e+06	4750517	2863		Heavy	Peak Found	High	High	0.18	0.0001192	0.0002417	3.09	46.92
	TRUE	High	[K].LAQMFSDMVLK.[D]	2xOxidation [M4; M8]; 1xLabel:13C(6)15N(2) [K11]	0.00104501	9.1126e-05	1	1	1	P02786	P02786 [429-439]		0	1322.66	1.045	0.982416	0	97.8	102.2	4.33511e+06	3.77051e+06	2864		Heavy	Peak Found	High	High	0.49	0.0001192	0.0006404	3.14	35.68
	TRUE	High	[K].LAQMFSDMVLKDGFQPSR.[S]	1xOxidation [M8]	0.00187869	0.000224419	1	1	1	P02786	P02786 [429-446]		1	2086.01								2866	No Quan Values	Light	High	Not Found	High	0.82	0.0002185	0.001178	3.29
	TRUE	High	[K].LAVDEEENADNNTKANVTKPK.[R]		1.03833e-06	9.1126e-05	1	1	3	P02786	P02786 [40-60]		1	2300.14	0.897	0.385313	0	105.4	94.6	17981263	1.34211e+07	2896		Light	High	Peak Found	High	0.26	0.0001192	4.76e-07	4.41	15.48
	TRUE	High	[K].LAVDEEENADNNTKANVTKPK.[R]	3xLabel:13C(6)15N(2) [K14; K19; K21]	9.90946e-08	9.1126e-05	1	1	2	P02786	P02786 [40-60]		1	2324.18								2896	Redundant	Heavy	Peak Found	High	High	-0.1	0.0001192	4.126e-08	4.07	15.48
	TRUE	High	[K].LAVDEEENADNNTKANVTKPKR.[C]		0.00034915	9.1126e-05	1	1	1	P02786	P02786 [40-61]		2	2456.24	0.928	0.793453	0	103.7	96.3	986370	761961	2897		Light	High	Peak Found	High	0.41	0.0001192	0.000204	2.86	13.65
	TRUE	High	[K].LDSTDFTGTIK.[L]		0.0019762	0.000224419	1	1	1	P02786	P02786 [135-145]		0	1197.6								2969	Redundant	Light	High	Peak Found	High	0.69	0.0002185	0.001238	3.17	36.35
	TRUE	High	[K].LDSTDFTGTIK.[L]	1xLabel:13C(6)15N(2) [K11]	6.6544e-05	9.1126e-05	1	1	1	P02786	P02786 [135-145]		0	1205.61	1.117	0.743464	0	94.5	105.5	36628632	34056568	2969		Heavy	Peak Found	High	High	0.56	0.0001192	3.646e-05	3.08	36.35
	TRUE	High	[K].LLNENSYVPR.[E]		1.43433e-05	9.1126e-05	1	1	5	P02786	P02786 [146-155]		0	1204.63	0.951	0.581183	0	102.5	97.5	157215981	1.24373e+08	3415		Light	High	Peak Found	High	0.44	0.0001192	7.358e-06	3.63	31.02
	TRUE	High	[K].LLNENSYVPR.[E]	1xLabel:13C(6)15N(4) [R10]	9.68451e-06	9.1126e-05	1	1	4	P02786	P02786 [146-155]		0	1214.64								3415	Redundant	Heavy	Peak Found	High	High	0.67	0.0001192	4.877e-06	3.42	31.02
	TRUE	High	[K].ILNIFGVIK.[G]		8.39797e-05	9.1126e-05	1	1	2	P02786	P02786 [386-394]		0	1016.65	1.125	0.716069	0	94.1	105.9	1.28731e+07	1.20495e+07	3425		Light	High	Peak Found	High	-0.35	0.0001192	4.625e-05	2.83	67.83
	TRUE	High	[K].ILNIFGVIK.[G]	1xLabel:13C(6)15N(2) [K9]	2.52945e-05	9.1126e-05	1	1	5	P02786	P02786 [386-394]		0	1024.66								3425	Redundant	Heavy	Peak Found	High	High	-0.08	0.0001192	1.329e-05	3.21	67.83
	TRUE	High	[K].LSEKLDSTDFTGTIK.[L]		2.6535e-06	9.1126e-05	1	1	2	P02786	P02786 [131-145]		1	1654.85	1.126	0.713095	0	94.1	105.9	2.16337e+07	20264631	3750		Light	High	Peak Found	High	0.28	0.0001192	1.264e-06	3.87	38.33
	TRUE	High	[K].LSEKLDSTDFTGTIK.[L]	2xLabel:13C(6)15N(2) [K4; K15]	5.82057e-06	9.1126e-05	1	1	3	P02786	P02786 [131-145]		1	1670.88								3750	Redundant	Heavy	Peak Found	High	High	-0.37	0.0001192	2.878e-06	3.53	38.33
	TRUE	High	[K].LTVSNVLK.[E]		0.00201952	0.000224419	1	1	1	P02786	P02786 [375-382]		0	873.54	1.176	0.545591	0	91.9	108.1	30878070	30209816	3876		Light	High	Peak Found	High	0.13	0.0002185	0.00127	1.84	29.71
	TRUE	High	[K].LTVSNVLK.[E]	1xLabel:13C(6)15N(2) [K8]	0.00643384	0.000694413	1	1	1	P02786	P02786 [375-382]		0	881.555								3876	Redundant	Heavy	Peak Found	High	High	0.3	0.0005813	0.004228	2.15	29.71
	TRUE	High	[R].LVYLVENPGGYVAYSK.[A]		8.2967e-09	9.1126e-05	1	1	17	P02786	P02786 [209-224]		0	1771.93								3982	Redundant	Light	High	Peak Found	High	-0.22	0.0001192	3.114e-09	5.13	55.61
	TRUE	High	[R].LVYLVENPGGYVAYSK.[A]	1xLabel:13C(6)15N(2) [K16]	1.4212e-08	9.1126e-05	1	1	9	P02786	P02786 [209-224]		0	1779.94	0.966	0.642434	0	101.7	98.3	5.55902e+07	4.46888e+07	3982		Heavy	Peak Found	High	High	0.24	0.0001192	5.438e-09	5.06	55.61
	TRUE	High	[R].LYWDDLKR.[K]	1xLabel:13C(6)15N(2) [K7]; 1xLabel:13C(6)15N(4) [R8]	0.00090392	9.1126e-05	1	1	1	P02786	P02786 [122-129]		1	1126.6	100	1e-17			200		759798	4032		Heavy	Not Found	High	High	-1.09	0.0001192	0.0005507	1.93	36.65
	TRUE	High	[R].RLYWDDLKR.[K]		9.16373e-05	9.1126e-05	1	1	3	P02786	P02786 [121-129]		2	1264.68								5234	Redundant	Light	High	Peak Found	High	-0.56	0.0001192	5.077e-05	3.4	31.75
	TRUE	High	[R].RLYWDDLKR.[K]	1xLabel:13C(6)15N(2) [K8]; 2xLabel:13C(6)15N(4) [R1; R9]	0.000155812	9.1126e-05	1	1	3	P02786	P02786 [121-129]		2	1292.71	1.229	0.397343	0	89.7	110.3	21679738	22175174	5234		Heavy	Peak Found	High	High	-0.28	0.0001192	8.828e-05	3.41	31.75
	TRUE	High	[R].SAFSNLFGGEPLSYTR.[F]		1.20227e-08	9.1126e-05	1	1	8	P02786	P02786 [7-22]		0	1745.85	0.887	0.35222	0	106	94	4.71547e+07	3.47962e+07	5289		Light	High	Peak Found	High	-0.03	0.0001192	4.566e-09	5.44	67.43
	TRUE	High	[R].SAFSNLFGGEPLSYTR.[F]	1xLabel:13C(6)15N(4) [R16]	4.03362e-07	9.1126e-05	1	1	5	P02786	P02786 [7-22]		0	1755.86								5289	Redundant	Heavy	Peak Found	High	High	0.06	0.0001192	1.777e-07	5.05	67.43
	TRUE	High	[K].SGVGTALLLK.[L]		6.30538e-06	9.1126e-05	1	1	2	P02786	P02786 [419-428]		0	958.593	1.149	0.632382	0	93.1	106.9	30427176	29087242	5469		Light	High	Peak Found	High	-0.05	0.0001192	3.125e-06	2.92	38.44
	TRUE	High	[K].SGVGTALLLK.[L]	1xLabel:13C(6)15N(2) [K10]	1.62311e-05	9.1126e-05	1	1	2	P02786	P02786 [419-428]		0	966.607								5469	Redundant	Heavy	Peak Found	High	High	-0.27	0.0001192	8.38e-06	3.67	38.44
	TRUE	High	[R].SSGLPNIPVQTISR.[A]		8.45926e-05	9.1126e-05	1	1	2	P02786	P02786 [326-339]		0	1468.81								5734	Redundant	Light	High	Peak Found	High	0	0.0001192	4.686e-05	2.97	46.1
	TRUE	High	[R].SSGLPNIPVQTISR.[A]	1xLabel:13C(6)15N(4) [R14]	1.59967e-05	9.1126e-05	1	1	2	P02786	P02786 [326-339]		0	1478.82	0.859	0.27043	0	107.6	92.4	168164544	120234928	5734		Heavy	Peak Found	High	High	0.03	0.0001192	8.249e-06	3.16	46.1
	TRUE	High	[K].TMQNVKHPVTGQFLYQDSNWASK.[V]		1.22364e-07	9.1126e-05	1	1	3	P02786	P02786 [509-531]		1	2679.3								6150	Redundant	Light	High	Peak Found	High	-0.04	0.0001192	5.131e-08	6.82	45.16
	TRUE	High	[K].TMQNVKHPVTGQFLYQDSNWASK.[V]	1xOxidation [M2]	1.74024e-06	9.1126e-05	1	1	3	P02786	P02786 [509-531]		1	2695.29								6148	Redundant	Light	High	Peak Found	High	-0.42	0.0001192	8.134e-07	3.82	41.35
	TRUE	High	[K].TMQNVKHPVTGQFLYQDSNWASK.[V]	2xLabel:13C(6)15N(2) [K6; K23]	1.25977e-07	9.1126e-05	1	1	4	P02786	P02786 [509-531]		1	2695.33	0.549	0.000405211	0	129.1	70.9	1.65038e+07	7.54332e+06	6150		Heavy	Peak Found	High	High	0.75	0.0001192	5.286e-08	6.06	45.37
	TRUE	High	[K].TMQNVKHPVTGQFLYQDSNWASK.[V]	1xOxidation [M2]; 2xLabel:13C(6)15N(2) [K6; K23]	2.05082e-07	9.1126e-05	1	1	3	P02786	P02786 [509-531]		1	2711.32	0.982	0.707588	0	100.9	99.1	1.08248e+07	8.84587e+06	6148		Heavy	Peak Found	High	High	0.23	0.0001192	8.769e-08	5.69	41.35
	TRUE	High	[R].VEYHFLSPYVSPK.[E]		5.18114e-06	9.1126e-05	1	1	4	P02786	P02786 [681-693]		0	1565.8								6529	Redundant	Light	High	Peak Found	High	0.02	0.0001192	2.54e-06	3.32	47.52
	TRUE	High	[R].VEYHFLSPYVSPK.[E]	1xLabel:13C(6)15N(2) [K13]	2.87452e-06	9.1126e-05	1	1	5	P02786	P02786 [681-693]		0	1573.81	0.912	0.436013	0	104.6	95.4	7.10153e+07	5.38814e+07	6529		Heavy	Peak Found	High	High	0.46	0.0001192	1.373e-06	3.59	47.52
	TRUE	High	[K].VSASPLLYTLIEK.[T]		7.59467e-07	9.1126e-05	1	1	3	P02786	P02786 [496-508]		0	1433.83								6897	Redundant	Light	High	Peak Found	High	-0.43	0.0001192	3.447e-07	3.56	66.35
	TRUE	High	[K].VSASPLLYTLIEK.[T]	1xLabel:13C(6)15N(2) [K13]	7.27036e-07	9.1126e-05	1	1	3	P02786	P02786 [496-508]		0	1441.84	0.967	0.644878	0	101.7	98.3	30533664	24561320	6897		Heavy	Peak Found	High	High	-0.03	0.0001192	3.29e-07	4.01	66.35
	TRUE	High	[R].YNSQLLSFVR.[D]		2.82102e-05	9.1126e-05	1	1	1	P02786	P02786 [614-623]		0	1226.65	1.051	0.996022	0	97.5	102.5	14168662	12393383	7221		Light	High	Peak Found	High	0.5	0.0001192	1.484e-05	2.97	54.07
	TRUE	High	[R].YNSQLLSFVR.[D]	1xLabel:13C(6)15N(4) [R10]	4.178e-05	9.1126e-05	1	1	2	P02786	P02786 [614-623]		0	1236.66								7221	Redundant	Heavy	Peak Found	High	High	-0.26	0.0001192	2.231e-05	2.11	54.07
TRUE	High	Master Protein	Q14126	Desmoglein-2 OS=Homo sapiens OX=9606 GN=DSG2 PE=1 SV=2	0	358.394	34	21	83	21	1118	122.2	5.24	302.15	21	Pf00028	1829	ENSG00000046604	DSG2	hsa:1829; Q14126; Q4KKU6	Arrhythmogenic right ventricular cardiomyopathy	RHOG GTPase cycle; RAC2 GTPase cycle; RAC3 GTPase cycle; Formation of the cornified envelope; Apoptotic cleavage of cell adhesion proteins	Arrhythmogenic right ventricular cardiomyopathy	8	0	1.143	0.54857	19.69	94.6	105.4	1.17478e+08	1.08838e+08	High	High	1
	Checked	Confidence	Annotated Sequence	Modifications	Qvality PEP	Qvality q-value	# Protein Groups	# Proteins	# PSMs	Master Protein Accessions	Positions in Master Proteins	Modifications in Master Proteins	# Missed Cleavages	Theo. MH+ [Da]	Abundance Ratio: (Heavy) / (Light)	Abundance Ratio P-Value: (Heavy) / (Light)	Abundance Ratio Variability [%]: (Heavy) / (Light)	Abundances (Grouped): Light	Abundances (Grouped): Heavy	Abundance: F2: Light, Sample	Abundance: F2: Heavy, Sample	Precursor Quan Result ID	Quan Info	Quan Channel	Found in Sample: [S2] F2: Light, Sample	Found in Sample: [S4] F2: Heavy, Sample	Confidence (by Search Engine): Sequest HT	DeltaM [ppm] (by Search Engine): Sequest HT	Percolator q-Value (by Search Engine): Sequest HT	Percolator PEP (by Search Engine): Sequest HT	XCorr (by Search Engine): Sequest HT	Top Apex RT [min]
	TRUE	High	[R].ATQFTGATGAIMTTETTK.[T]		1.05918e-09	9.1126e-05	1	1	2	Q14126	Q14126 [729-746]		0	1829.89	1.348	0.192235	0	85.2	114.8	7.823e+06	8776813	662		Light	High	Peak Found	High	-0.39	0.0001192	3.636e-10	5.12	38.51
	TRUE	High	[R].ATQFTGATGAIMTTETTK.[T]	1xLabel:13C(6)15N(2) [K18]	9.49705e-10	9.1126e-05	1	1	2	Q14126	Q14126 [729-746]		0	1837.91								662	Redundant	Heavy	Peak Found	High	High	-0.8	0.0001192	3.25e-10	5.83	38.51
	TRUE	High	[R].ATQFTGATGAIMTTETTK.[T]	1xOxidation [M12]	5.55496e-07	9.1126e-05	1	1	1	Q14126	Q14126 [729-746]		0	1845.89	1.299	0.304711	0	87	113	4.20096e+06	4.5408e+06	661		Light	High	Peak Found	High	-2.1	0.0001192	2.49e-07	4.96	30.31
	TRUE	High	[R].ATQFTGATGAIMTTETTK.[T]	1xOxidation [M12]; 1xLabel:13C(6)15N(2) [K18]	1.95945e-10	9.1126e-05	1	1	1	Q14126	Q14126 [729-746]		0	1853.9								661	Redundant	Heavy	Peak Found	High	High	1.05	0.0001192	6.267e-11	5.66	30.31
	TRUE	High	[R].AWITAPVALR.[E]		0.00953363	0.00102822	1	1	1	Q14126	Q14126 [50-59]		0	1097.65								725	Redundant	Light	High	Peak Found	High	-0.09	0.0009208	0.00634	2.09	53.37
	TRUE	High	[R].AWITAPVALR.[E]	1xLabel:13C(6)15N(4) [R10]	0.00218658	0.000224419	1	1	2	Q14126	Q14126 [50-59]		0	1107.65	1.137	0.672994	0	93.6	106.4	11109468	10510850	725		Heavy	Peak Found	High	High	-0.05	0.0002185	0.00138	2.42	53.37
	TRUE	High	[R].DGNGEVTDKPVKQAQVQIR.[I]		5.53164e-06	9.1126e-05	1	1	2	Q14126	Q14126 [243-261]		1	2082.09	1.202	0.524756	0	90.8	109.2	5.00653e+06	5.00786e+06	904		Light	High	Peak Found	High	-0.36	0.0001192	2.726e-06	3.94	19.75
	TRUE	High	[R].DGNGEVTDKPVKQAQVQIR.[I]	2xLabel:13C(6)15N(2) [K9; K12]; 1xLabel:13C(6)15N(4) [R19]	0.000264895	9.1126e-05	1	1	2	Q14126	Q14126 [243-261]		1	2108.13								904	Redundant	Heavy	Peak Found	High	High	-1.21	0.0001192	0.0001531	3.56	19.75
	TRUE	High	[R].DMAGAQAAAVALNEEFLR.[N]		1.03197e-08	9.1126e-05	1	1	1	Q14126	Q14126 [756-773]		0	1876.92	1.221	0.485575	0	90	110	367573	373513	1035		Light	High	Peak Found	High	0.21	0.0001192	3.906e-09	4.91	71.32
	TRUE	High	[R].DMAGAQAAAVALNEEFLR.[N]	1xLabel:13C(6)15N(4) [R18]	3.80992e-09	9.1126e-05	1	1	1	Q14126	Q14126 [756-773]		0	1886.93								1035	Redundant	Heavy	Peak Found	High	High	1.33	0.0001192	1.383e-09	4.95	71.32
	TRUE	High	[R].DMAGAQAAAVALNEEFLR.[N]	1xOxidation [M2]	1.14741e-09	9.1126e-05	1	1	2	Q14126	Q14126 [756-773]		0	1892.92	1.291	0.303884	0	87.3	112.7	1.95768e+06	2.10368e+06	1034		Light	High	Peak Found	High	-0.44	0.0001192	3.967e-10	5.53	63.45
	TRUE	High	[R].DMAGAQAAAVALNEEFLR.[N]	1xOxidation [M2]; 1xLabel:13C(6)15N(4) [R18]	6.04985e-10	9.1126e-05	1	1	3	Q14126	Q14126 [756-773]		0	1902.93								1034	Redundant	Heavy	Peak Found	High	High	0.6	0.0001192	2.032e-10	5.08	63.45
	TRUE	High	[R].DMAGAQAAAVALNEEFLR.[N]	1xDeamidated [Q6]; 1xOxidation [M2]; 1xLabel:13C(6)15N(4) [R18]	0.00706153	0.000694413	1	1	1	Q14126	Q14126 [756-773]		0	1903.91								1033	No Quan Values	Heavy	Not Found	High	High	4.57	0.0006708	0.004655	2.7
	TRUE	High	[R].DNWISVDSVTSEIK.[L]		1.93266e-05	9.1126e-05	1	1	1	Q14126	Q14126 [435-448]		0	1592.78								1066	Redundant	Light	High	Peak Found	High	-0.01	0.0001192	1.003e-05	3.13	60.88
	TRUE	High	[R].DNWISVDSVTSEIK.[L]	1xLabel:13C(6)15N(2) [K14]	9.29798e-05	9.1126e-05	1	1	1	Q14126	Q14126 [435-448]		0	1600.79	1.305	0.298693	0	86.8	113.2	3.46135e+06	3.76005e+06	1066		Heavy	Peak Found	High	High	0.2	0.0001192	5.135e-05	3.78	60.88
	TRUE	High	[K].DTGEIYTTSVTLDR.[E]	1xLabel:13C(6)15N(4) [R14]	3.25285e-06	9.1126e-05	1	1	1	Q14126	Q14126 [216-229]		0	1580.77	1.149	0.658211	0	93.1	106.9	6471825	6.18685e+06	1151		Heavy	Peak Found	High	High	0.75	0.0001192	1.566e-06	3.26	42.78
	TRUE	High	[R].EEHSSYTLTVEAR.[D]		0.00164935	0.000224419	1	1	1	Q14126	Q14126 [230-242]		0	1521.72	1.383	0.227311	0	83.9	116.1	1.72235e+06	1982728	1383		Light	High	Peak Found	High	0.43	0.0002185	0.001028	2.53	22.66
	TRUE	High	[K].GFTPIPGTIEMLHPWNNEGAPPEDK.[V]		0.0118063	0.00122778	1	1	1	Q14126	Q14126 [643-667]		0	2747.31								2171	Redundant	Light	High	Peak Found	High	0.88	0.001157	0.007943	2.71	66.55
	TRUE	High	[K].GFTPIPGTIEMLHPWNNEGAPPEDK.[V]	1xLabel:13C(6)15N(2) [K25]	0.0510052	0.00320554	1	1	1	Q14126	Q14126 [643-667]		0	2755.33	0.761	0.297004	0	113.5	86.5	1.42774e+06	904565	2171		Heavy	Peak Found	High	High	1.33	0.002779	0.03659	2.49	66.55
	TRUE	High	[K].GFTPIPGTIEMLHPWNNEGAPPEDK.[V]	1xOxidation [M11]	0.0364375	0.00245725	1	1	1	Q14126	Q14126 [643-667]		0	2763.31								2172	Redundant	Light	High	Peak Found	High	0.38	0.002224	0.02578	2.06	60.19
	TRUE	High	[K].GFTPIPGTIEMLHPWNNEGAPPEDK.[V]	1xOxidation [M11]; 1xLabel:13C(6)15N(2) [K25]	0.0109948	0.00122778	1	1	1	Q14126	Q14126 [643-667]		0	2771.32	0.694	0.106627	0	118.1	81.9	1.93375e+06	1.1161e+06	2172		Heavy	Peak Found	High	High	0.3	0.001157	0.007335	2.46	60.19
	TRUE	High	[K].GITEPPFGIFVFNK.[D]		0.00329857	0.000477939	1	1	1	Q14126	Q14126 [93-106]		0	1565.84	1.092	0.730947	0	95.6	104.4	327813	297900	2301		Light	High	Peak Found	High	0.61	0.0004125	0.00211	2.75	76.18
	TRUE	High	[K].GITEPPFGIFVFNK.[D]	1xLabel:13C(6)15N(2) [K14]	0.00199054	0.000224419	1	1	1	Q14126	Q14126 [93-106]		0	1573.85								2301	Redundant	Heavy	Peak Found	High	High	1.51	0.0002185	0.001247	2.69	76.18
	TRUE	High	[K].GQIIGNFQAFDEDTGLPAHAR.[Y]		0.000143835	9.1126e-05	1	1	1	Q14126	Q14126 [407-427]		0	2257.1	1.282	0.346976	0	87.6	112.4	7.16057e+06	7639003	2381		Light	High	Peak Found	High	0.2	0.0001192	8.142e-05	2.66	55.52
	TRUE	High	[K].GQIIGNFQAFDEDTGLPAHAR.[Y]	1xLabel:13C(6)15N(4) [R21]	0.00010832	9.1126e-05	1	1	2	Q14126	Q14126 [407-427]		0	2267.11								2381	Redundant	Heavy	Peak Found	High	High	0.4	0.0001192	6.05e-05	3.58	55.52
	TRUE	High	[K].LAKLPDFESR.[Y]		0.00862681	0.000914196	1	1	1	Q14126	Q14126 [449-458]		1	1175.64	1.158	0.667765	0	92.7	107.3	1.73497e+06	1.67123e+06	2826		Light	High	Peak Found	High	-0.43	0.0008339	0.005715	3.05	32.24
	TRUE	High	[K].LAKLPDFESR.[Y]	1xLabel:13C(6)15N(2) [K3]; 1xLabel:13C(6)15N(4) [R10]	0.000568055	9.1126e-05	1	1	1	Q14126	Q14126 [449-458]		1	1193.66								2826	Redundant	Heavy	Peak Found	High	High	-0.44	0.0001192	0.0003399	2.52	32.24
	TRUE	High	[R].ILDVNDNIPVVENK.[V]		2.34487e-06	9.1126e-05	1	1	2	Q14126	Q14126 [262-275]		0	1581.85	1.046	0.9732	0	97.8	102.2	16335864	14214108	3329		Light	High	Peak Found	High	0.39	0.0001192	1.111e-06	4.2	46.49
	TRUE	High	[R].IVSLEPAYPPVFYLNK.[D]		7.67358e-06	9.1126e-05	1	1	1	Q14126	Q14126 [200-215]		0	1850.01	1.016	0.996779	0	99.2	100.8	2.70951e+06	2.29158e+06	3969		Light	High	Peak Found	High	-0.14	0.0001192	3.84e-06	3.42	71.09
	TRUE	High	[R].IVSLEPAYPPVFYLNK.[D]	1xLabel:13C(6)15N(2) [K16]	1.59967e-05	9.1126e-05	1	1	2	Q14126	Q14126 [200-215]		0	1858.02								3969	Redundant	Heavy	Peak Found	High	High	-0.42	0.0001192	8.209e-06	3.5	71.09
	TRUE	High	[R].NTTVSGAGVPGPLPDFGLEESGHSNSTITTSSTR.[V]		0.00643384	0.000694413	1	1	1	Q14126	Q14126 [1073-1106]		0	3373.61	0.795	0.403991	0	111.4	88.6	1286439	851064	4860		Light	High	Peak Found	High	-0.56	0.0005813	0.004208	2.14	54.94
	TRUE	High	[R].QESTSVLLQQSEK.[K]		1.21338e-05	9.1126e-05	1	1	2	Q14126	Q14126 [549-561]		0	1476.75	1.463	0.110067	0	81.2	118.8	6.82175e+06	8.30275e+06	4963		Light	High	Peak Found	High	-0.15	0.0001192	6.188e-06	3.37	25.57
	TRUE	High	[R].QESTSVLLQQSEK.[K]	2xDeamidated [Q1; Q9]	0.0308386	0.00196171	1	1	1	Q14126	Q14126 [549-561]		0	1478.72								4964	No Quan Values	Light	High	Not Found	High	-2.46	0.001771	0.02151	1.91
	TRUE	High	[R].QESTSVLLQQSEK.[K]	1xLabel:13C(6)15N(2) [K13]	0.00021769	9.1126e-05	1	1	1	Q14126	Q14126 [549-561]		0	1484.77								4963	Redundant	Heavy	Peak Found	High	High	0.58	0.0001192	0.0001252	3.63	25.57
	TRUE	High	[K].SLQEANAEKVTQEIVTER.[S]	1xLabel:13C(6)15N(2) [K9]; 1xLabel:13C(6)15N(4) [R18]	0.0344711	0.00216173	1	1	1	Q14126	Q14126 [893-910]		1	2063.07	2.335	0.00127026	0	60	140	766363	1.48892e+06	5558		Heavy	Peak Found	High	High	-2.39	0.002001	0.02424	2.19	43.87
	TRUE	High	[R].VLAPASTLQSSYQIPTENSMTAR.[N]		1.70461e-08	9.1126e-05	1	1	2	Q14126	Q14126 [1050-1072]		0	2465.23	0.988	0.746989	0	100.6	99.4	5.95501e+06	4.8949e+06	6652		Light	High	Peak Found	High	0.25	0.0001192	6.585e-09	3.53	53.27
	TRUE	High	[R].VLAPASTLQSSYQIPTENSMTAR.[N]	1xLabel:13C(6)15N(4) [R23]	5.6601e-08	9.1126e-05	1	1	2	Q14126	Q14126 [1050-1072]		0	2475.24								6652	Redundant	Heavy	Peak Found	High	High	-1.28	0.0001192	2.29e-08	5.25	53.27
	TRUE	High	[R].VLAPASTLQSSYQIPTENSMTAR.[N]	1xOxidation [M20]	7.71468e-09	9.1126e-05	1	1	2	Q14126	Q14126 [1050-1072]		0	2481.23	0.996	0.784235	0	100.2	99.8	5.25543e+06	4.3546e+06	6654		Light	High	Peak Found	High	1.34	0.0001192	2.876e-09	4.32	47.84
	TRUE	High	[R].VLAPASTLQSSYQIPTENSMTAR.[N]	1xOxidation [M20]; 1xLabel:13C(6)15N(4) [R23]	0.000327046	9.1126e-05	1	1	2	Q14126	Q14126 [1050-1072]		0	2491.24								6654	Redundant	Heavy	Peak Found	High	High	-2.08	0.0001192	0.0001912	4.42	47.84
	TRUE	High	[K].VLEGMVEENQVNVEVTR.[I]	1xOxidation [M5]	1.07679e-06	9.1126e-05	1	1	1	Q14126	Q14126 [276-292]		0	1960.96								6678	No Quan Values	Light	High	Not Found	High	-0.94	0.0001192	4.95e-07	3.86
	TRUE	High	[R].VIQPHGGGSNPLEGTQHLQDVPYVMVR.[E]		3.62782e-06	9.1126e-05	1	1	2	Q14126	Q14126 [991-1017]		0	2928.48								6751	Redundant	Light	High	Peak Found	High	-0.39	0.0001192	1.749e-06	4.71	53.58
	TRUE	High	[R].VIQPHGGGSNPLEGTQHLQDVPYVMVR.[E]	1xLabel:13C(6)15N(4) [R27]	6.18765e-05	9.1126e-05	1	1	1	Q14126	Q14126 [991-1017]		0	2938.49	0.922	0.677469	0	104	96	3.06711e+06	2354374	6751		Heavy	Peak Found	High	High	0.7	0.0001192	3.366e-05	3.43	53.58
	TRUE	High	[R].VIQPHGGGSNPLEGTQHLQDVPYVMVR.[E]	1xOxidation [M25]	0.00200498	0.000224419	1	1	1	Q14126	Q14126 [991-1017]		0	2944.47	0.01	1e-17		200		1.28209e+06		6749		Light	High	Not Found	High	0.17	0.0002185	0.00126	3.03	48.91
	TRUE	High	[R].VIQPHGGGSNPLEGTQHLQDVPYVMVR.[E]	1xOxidation [M25]; 1xLabel:13C(6)15N(4) [R27]	0.000568055	9.1126e-05	1	1	1	Q14126	Q14126 [991-1017]		0	2954.48								6749	Redundant	Heavy	Peak Found	High	High	2.08	0.0001192	0.0003385	3.28
	TRUE	High	[K].VVPSFLPVDQGGSLVGR.[N]		1.00856e-06	9.1126e-05	1	1	2	Q14126	Q14126 [668-684]		0	1726.95	0.922	0.473768	0	104	96	16887411	1.29612e+07	6977		Light	High	Peak Found	High	-0.05	0.0001192	4.635e-07	3.12	61.38
	TRUE	High	[K].VVPSFLPVDQGGSLVGR.[N]	1xLabel:13C(6)15N(4) [R17]	2.27065e-07	9.1126e-05	1	1	3	Q14126	Q14126 [668-684]		0	1736.96								6977	Redundant	Heavy	Peak Found	High	High	0.31	0.0001192	9.757e-08	3.85	61.38
	TRUE	High	[R].VYAPASTLVDQPYANEGTVVVTER.[V]		4.76812e-07	9.1126e-05	1	1	1	Q14126	Q14126 [967-990]		0	2579.3	1.125	0.638595	0	94.1	105.9	2.40573e+06	2.25307e+06	7006		Light	High	Peak Found	High	0.4	0.0001192	2.115e-07	4.77
	TRUE	High	[R].VYAPASTLVDQPYANEGTVVVTER.[V]	1xLabel:13C(6)15N(4) [R24]	1.4615e-06	9.1126e-05	1	1	2	Q14126	Q14126 [967-990]		0	2589.31								7006	Redundant	Heavy	Peak Found	High	High	0.22	0.0001192	6.781e-07	4.59	55.26
	TRUE	High	[R].VYAPASTLVDQPYANEGTVVVTER.[V]	1xDeamidated [N15]; 1xLabel:13C(6)15N(4) [R24]	1.04271e-07	9.1126e-05	1	1	2	Q14126	Q14126 [967-990]		0	2590.29								7005	No Quan Values	Heavy	Not Found	High	High	4.79	0.0001192	4.349e-08	5.08
TRUE	High	Master Protein	P27824	Calnexin OS=Homo sapiens OX=9606 GN=CANX PE=1 SV=2	0	355.535	35	26	151	25	592	67.5	4.6	452.76	26	Pf00262	821	ENSG00000127022; ENSG00000283777	CANX	B2R5V8; B4DGP8; B4E2T8; D3DWQ3; D6R9K3; hsa:821; P27824		MHC class II antigen presentation; Antigen Presentation: Folding, assembly and peptide loading of class I MHC; Maturation of spike protein; Interleukin-35 Signalling; Interleukin-27 signaling; Assembly of Viral Components at the Budding Site; Calnexin/calreticulin cycle; Maturation of spike protein	Protein processing in endoplasmic reticulum; Phagosome; Antigen processing and presentation; Thyroid hormone synthesis; Human T-cell leukemia virus 1 infection	13	1	1.238	0.28589	19.01	92.1	107.9	1.09086e+09	1.06303e+09	High	High	1
	Checked	Confidence	Annotated Sequence	Modifications	Qvality PEP	Qvality q-value	# Protein Groups	# Proteins	# PSMs	Master Protein Accessions	Positions in Master Proteins	Modifications in Master Proteins	# Missed Cleavages	Theo. MH+ [Da]	Abundance Ratio: (Heavy) / (Light)	Abundance Ratio P-Value: (Heavy) / (Light)	Abundance Ratio Variability [%]: (Heavy) / (Light)	Abundances (Grouped): Light	Abundances (Grouped): Heavy	Abundance: F2: Light, Sample	Abundance: F2: Heavy, Sample	Precursor Quan Result ID	Quan Info	Quan Channel	Found in Sample: [S2] F2: Light, Sample	Found in Sample: [S4] F2: Heavy, Sample	Confidence (by Search Engine): Sequest HT	DeltaM [ppm] (by Search Engine): Sequest HT	Percolator q-Value (by Search Engine): Sequest HT	Percolator PEP (by Search Engine): Sequest HT	XCorr (by Search Engine): Sequest HT	Top Apex RT [min]
	TRUE	High	[K].AEEDEILNRSPR.[N]		0.0108392	0.00122778	1	1	1	P27824	P27824 [574-585]		1	1428.71	1.088	0.855244	0	95.8	104.2	13567862	12283759	135		Light	High	Peak Found	High	-0.04	0.001089	0.007226	2.2	21.05
	TRUE	High	[K].AEEDEILNRSPR.[N]	2xLabel:13C(6)15N(4) [R9; R12]	0.00643384	0.000694413	1	1	1	P27824	P27824 [574-585]		1	1448.72								135	Redundant	Heavy	Peak Found	High	High	0.03	0.0005813	0.00422	1.81	21.05
	TRUE	High	[K].AKKDDTDDEIAK.[Y]	3xLabel:13C(6)15N(2) [K2; K3; K12]	0.055325	0.00359166	1	1	1	P27824	P27824 [88-99]		2	1372.7	1.254	0.373079	0	88.8	111.2	17559.4	18315.6	270		Heavy	Peak Found	High	High	-0.13	0.00307	0.03995	2.85	12.23
	TRUE	High	[K].APVPTGEVYFADSFDR.[G]		1.8445e-06	9.1126e-05	1	1	3	P27824	P27824 [62-77]		0	1770.83	1.282	0.282725	0	87.7	112.3	2.18124e+07	2.3265e+07	525		Light	High	Peak Found	High	-0.39	0.0001192	8.694e-07	3.3	57.73
	TRUE	High	[K].APVPTGEVYFADSFDR.[G]	1xLabel:13C(6)15N(4) [R16]	1.04912e-05	9.1126e-05	1	1	2	P27824	P27824 [62-77]		0	1780.84								525	Redundant	Heavy	Peak Found	High	High	0.18	0.0001192	5.285e-06	4.02	57.73
	TRUE	High	[K].DDTDDEIAKYDGK.[W]		8.90102e-05	9.1126e-05	1	1	1	P27824	P27824 [91-103]		1	1484.64								810	Redundant	Light	High	Peak Found	High	0.23	0.0001192	4.94e-05	2.96	23.81
	TRUE	High	[K].DDTDDEIAKYDGK.[W]	2xLabel:13C(6)15N(2) [K9; K13]	7.10451e-05	9.1126e-05	1	1	1	P27824	P27824 [91-103]		1	1500.67	1.166	0.62917	0	92.3	107.7	5690328	5521574	810		Heavy	Peak Found	High	High	1.16	0.0001192	3.882e-05	3.11	23.81
	TRUE	High	[R].EIEDPEDRKPEDWDERPK.[I]		5.61269e-06	9.1126e-05	1	1	6	P27824	P27824 [275-292]		1	2283.05								1539	Redundant	Light	High	Peak Found	High	-0.02	0.0001192	2.767e-06	4.78	23.38
	TRUE	High	[R].EIEDPEDRKPEDWDERPK.[I]	2xLabel:13C(6)15N(2) [K9; K18]; 2xLabel:13C(6)15N(4) [R8; R16]	0.000111517	9.1126e-05	1	1	3	P27824	P27824 [275-292]		1	2319.1	0.863	0.280909	0	107.4	92.6	1.53168e+08	1.09993e+08	1539		Heavy	Peak Found	High	High	-0.13	0.0001192	6.228e-05	4.41	23.38
	TRUE	High	[K].ESKLPGDKGLVLMSR.[A]		0.000154683	9.1126e-05	1	1	2	P27824	P27824 [111-125]		2	1629.9								1728	Redundant	Light	High	Peak Found	High	-0.01	0.0001192	8.775e-05	2.68	33.11
	TRUE	High	[K].ESKLPGDKGLVLMSR.[A]	2xLabel:13C(6)15N(2) [K3; K8]; 1xLabel:13C(6)15N(4) [R15]	0.00887682	0.000914196	1	1	1	P27824	P27824 [111-125]		2	1655.94	1.318	0.219542	0	86.3	113.7	2.41621e+07	2.65087e+07	1728		Heavy	Peak Found	High	High	0.57	0.0008339	0.005894	2.66	33.11
	TRUE	High	[K].GKWKPPMIDNPSYQGIWKPR.[K]		7.30098e-08	9.1126e-05	1	1	2	P27824	P27824 [381-400]		1	2398.25								2235	Redundant	Light	High	Peak Found	High	0.05	0.0001192	3e-08	4.59	54.6
	TRUE	High	[K].GKWKPPMIDNPSYQGIWKPR.[K]	1xOxidation [M7]	1.69034e-06	9.1126e-05	1	1	2	P27824	P27824 [381-400]		1	2414.24	0.774	0.131989	0	112.8	87.2	6952963	4476009	2236		Light	High	Peak Found	High	0.25	0.0001192	7.9e-07	3.71	50.8
	TRUE	High	[K].GKWKPPMIDNPSYQGIWKPR.[K]	3xLabel:13C(6)15N(2) [K2; K4; K18]; 1xLabel:13C(6)15N(4) [R20]	0.000339147	9.1126e-05	1	1	1	P27824	P27824 [381-400]		1	2432.3	0.762	0.11479	0	113.5	86.5	6118060	3.88047e+06	2235		Heavy	Peak Found	High	High	-0.28	0.0001192	0.000199	3.59	54.6
	TRUE	High	[R].GTLSGWILSK.[A]		9.85493e-05	9.1126e-05	1	1	3	P27824	P27824 [78-87]		0	1061.6	1.388	0.131497	0	83.7	116.3	87601880	101193424	2455		Light	High	Peak Found	High	0.13	0.0001192	5.474e-05	3.28	53.03
	TRUE	High	[R].GTLSGWILSK.[A]	1xLabel:13C(6)15N(2) [K10]	4.8674e-05	9.1126e-05	1	1	5	P27824	P27824 [78-87]		0	1069.61								2455	Redundant	Heavy	Peak Found	High	High	-0.13	0.0001192	2.621e-05	3.43	53.03
	TRUE	High	[R].KIPNPDFFEDLEPFR.[M]		4.4523e-08	9.1126e-05	1	1	4	P27824	P27824 [401-415]		1	1863.93	0.821	0.355934	0	109.9	90.1	3.3112e+06	2260924	2717		Light	High	Peak Found	High	-0.14	0.0001192	1.792e-08	5.05	71.43
	TRUE	High	[R].KIPNPDFFEDLEPFR.[M]	1xLabel:13C(6)15N(2) [K1]; 1xLabel:13C(6)15N(4) [R15]	1.75294e-06	9.1126e-05	1	1	4	P27824	P27824 [401-415]		1	1881.95								2717	Redundant	Heavy	Peak Found	High	High	0.3	0.0001192	8.197e-07	4.02	71.43
	TRUE	High	[R].KPEDWDERPK.[I]		0.0141029	0.00130832	1	1	1	P27824	P27824 [283-292]		0	1299.63	1.245	0.385635	0	89.1	110.9	40436.1	41899.4	2738		Light	High	Peak Found	High	-0.19	0.001212	0.009494	2.33	12.77
	TRUE	High	[K].LHFIFR.[H]		0.0545822	0.00349535	2	2	2	O14967; P27824	O14967 [191-196]; P27824 [200-205]		0	832.483	1.489	0.0539936	0	80.3	119.7	8233405	10203373	3234	Shared	Light	High	Peak Found	High	-0.11	0.002922	0.03928	1.54	40.11
	TRUE	High	[K].LHFIFR.[H]	1xLabel:13C(6)15N(4) [R6]	0.0524091	0.00330196	2	2	2	O14967; P27824	O14967 [191-196]; P27824 [200-205]		0	842.491								3234	Redundant	Heavy	Peak Found	High	High	-0.05	0.002779	0.03763	1.48	40.11
	TRUE	High	[K].IPDPEAVKPDDWDEDAPAK.[I]		2.07214e-06	9.1126e-05	1	1	3	P27824	P27824 [293-311]		0	2107.98	0.758	0.0739255	0	113.8	86.2	3.01589e+07	1.90125e+07	3589		Light	High	Peak Found	High	0.7	0.0001192	9.753e-07	3.31	41.43
	TRUE	High	[K].IPDPEAVKPDDWDEDAPAK.[I]	2xLabel:13C(6)15N(2) [K8; K19]	6.39778e-06	9.1126e-05	1	1	3	P27824	P27824 [293-311]		0	2124.01								3589	Redundant	Heavy	Peak Found	High	High	-0.37	0.0001192	3.178e-06	3.61	41.43
	TRUE	High	[K].LPGDKGLVLMSR.[A]		1.91865e-05	9.1126e-05	1	1	2	P27824	P27824 [114-125]		1	1285.73	1.238	0.375131	0	89.3	110.7	78034847	80414860	3600		Light	High	Peak Found	High	0.19	0.0001192	9.961e-06	2.65	37.95
	TRUE	High	[K].LPGDKGLVLMSR.[A]	1xOxidation [M10]	0.000810714	9.1126e-05	1	1	3	P27824	P27824 [114-125]		1	1301.72	1.269	0.30825	0	88.2	111.8	4.81309e+07	5.08168e+07	3601		Light	High	Peak Found	High	0	0.0001192	0.0004934	2.23	27.43
	TRUE	High	[K].LPGDKGLVLMSR.[A]	1xLabel:13C(6)15N(2) [K5]; 1xLabel:13C(6)15N(4) [R12]	3.05598e-05	9.1126e-05	1	1	5	P27824	P27824 [114-125]		1	1303.75								3600	Redundant	Heavy	Peak Found	High	High	-0.38	0.0001192	1.611e-05	3.41	37.95
	TRUE	High	[K].LPGDKGLVLMSR.[A]	1xOxidation [M10]; 1xLabel:13C(6)15N(2) [K5]; 1xLabel:13C(6)15N(4) [R12]	0.000203903	9.1126e-05	1	1	8	P27824	P27824 [114-125]		1	1319.75								3601	Redundant	Heavy	Peak Found	High	High	-0.09	0.0001192	0.0001168	2.62	27.43
	TRUE	High	[R].IVDDWANDGWGLK.[K]		3.32461e-06	9.1126e-05	1	1	3	P27824	P27824 [446-458]		0	1488.71								3898	Redundant	Light	High	Peak Found	High	-0.17	0.0001192	1.597e-06	4.31	58.84
	TRUE	High	[R].IVDDWANDGWGLK.[K]	1xLabel:13C(6)15N(2) [K13]	6.56649e-07	9.1126e-05	1	1	3	P27824	P27824 [446-458]		0	1496.73	1.239	0.372813	0	89.3	110.7	22365274	23065676	3898		Heavy	Peak Found	High	High	0.37	0.0001192	2.96e-07	4.36	58.84
	TRUE	High	[R].IVDDWANDGWGLKK.[A]		2.26802e-05	9.1126e-05	1	1	5	P27824	P27824 [446-459]		1	1616.81	1.345	0.18193	0	85.3	114.7	244884364	274006516	3899		Light	High	Peak Found	High	-0.06	0.0001192	1.183e-05	3.83	47.8
	TRUE	High	[R].IVDDWANDGWGLKK.[A]	2xLabel:13C(6)15N(2) [K13; K14]	8.58319e-05	9.1126e-05	1	1	4	P27824	P27824 [446-459]		1	1632.84								3899	Redundant	Heavy	Peak Found	High	High	0.05	0.0001192	4.757e-05	3.21	47.8
	TRUE	High	[R].RIVDDWANDGWGLK.[K]		0.000834588	9.1126e-05	1	1	1	P27824	P27824 [445-458]		1	1644.81	1.736	0.046871	0	73.1	126.9	742840	1.07302e+06	5230		Light	High	Peak Found	High	-0.31	0.0001192	0.0005075	4	55.33
	TRUE	High	[R].RIVDDWANDGWGLKK.[A]		3.91796e-07	9.1126e-05	1	1	2	P27824	P27824 [445-459]		2	1772.91								5231	Redundant	Light	High	Peak Found	High	0.33	0.0001192	1.726e-07	5.2	47.32
	TRUE	High	[R].RIVDDWANDGWGLKK.[A]	2xLabel:13C(6)15N(2) [K14; K15]; 1xLabel:13C(6)15N(4) [R1]	3.5905e-07	9.1126e-05	1	1	3	P27824	P27824 [445-459]		2	1798.94	1.378	0.141795	0	84.1	115.9	16811114	19280394	5231		Heavy	Peak Found	High	High	0.55	0.0001192	1.581e-07	5	47.32
	TRUE	High	[K].RPDADLKTYFTDKK.[T]		0.00201952	0.000224419	1	1	1	P27824	P27824 [221-234]		2	1697.89	100	1e-17			200		9993348	5239		Light	High	Peak Found	High	1.22	0.0002185	0.001273	2.02	26.92
	TRUE	High	[K].RPDADLKTYFTDKK.[T]	3xLabel:13C(6)15N(2) [K7; K13; K14]; 1xLabel:13C(6)15N(4) [R1]	0.00191988	0.000224419	1	1	1	P27824	P27824 [221-234]		2	1731.94								5239	Redundant	Heavy	Not Found	High	High	0.09	0.0002185	0.001204	3.04	26.92
	TRUE	High	[K].TPELNLDQFHDK.[T]		3.18625e-08	9.1126e-05	1	1	4	P27824	P27824 [171-182]		0	1456.71	1.08	0.888543	0	96.2	103.8	77405323	69536972	6171		Light	High	Peak Found	High	0.39	0.0001192	1.263e-08	4.65	37.24
	TRUE	High	[K].TPELNLDQFHDK.[T]	1xLabel:13C(6)15N(2) [K12]	2.08964e-08	9.1126e-05	1	1	3	P27824	P27824 [171-182]		0	1464.72								6171	Redundant	Heavy	Peak Found	High	High	0.24	0.0001192	8.148e-09	4.66	37.24
	TRUE	High	[K].TPELNLDQFHDKTPYTIMFGPDK.[C]	1xOxidation [M18]	2.91664e-06	9.1126e-05	1	1	2	P27824	P27824 [171-193]		1	2723.3	0.883	0.388857	0	106.2	93.8	7.49674e+06	5.50697e+06	6174		Light	High	Peak Found	High	-1.06	0.0001192	1.399e-06	4.14	58.91
	TRUE	High	[K].TPELNLDQFHDKTPYTIMFGPDK.[C]	2xLabel:13C(6)15N(2) [K12; K23]	9.64227e-05	9.1126e-05	1	1	2	P27824	P27824 [171-193]		1	2723.34	0.739	0.181671	0	115	85	2.69847e+06	1.65915e+06	6176		Heavy	Peak Found	High	High	-2.11	0.0001192	5.332e-05	5.12	64.93
	TRUE	High	[K].TPELNLDQFHDKTPYTIMFGPDK.[C]	1xOxidation [M18]; 2xLabel:13C(6)15N(2) [K12; K23]	2.26113e-06	9.1126e-05	1	1	1	P27824	P27824 [171-193]		1	2739.33								6174	Redundant	Heavy	Peak Found	High	High	0.21	0.0001192	1.071e-06	4.73	58.91
	TRUE	High	[K].TPYTIMFGPDK.[C]		0.000206889	9.1126e-05	1	1	2	P27824	P27824 [183-193]		0	1269.62	1.039	0.944908	0	98.1	101.9	19505098	16861320	6210		Light	High	Peak Found	High	0.54	0.0001192	0.0001183	2.81	49.52
	TRUE	High	[K].TPYTIMFGPDK.[C]	1xLabel:13C(6)15N(2) [K11]	2.33497e-05	9.1126e-05	1	1	1	P27824	P27824 [183-193]		0	1277.63								6210	Redundant	Heavy	Peak Found	High	High	0.03	0.0001192	1.219e-05	3.51	49.52
	TRUE	High	[K].TPYTIMFGPDK.[C]	1xOxidation [M6]	4.11767e-05	9.1126e-05	1	1	3	P27824	P27824 [183-193]		0	1285.61	1.025	0.88645	0	98.8	101.2	14241714	12145731	6211		Light	High	Peak Found	High	0.31	0.0001192	2.198e-05	3.24	41.54
	TRUE	High	[K].TPYTIMFGPDK.[C]	1xOxidation [M6]; 1xLabel:13C(6)15N(2) [K11]	1.00432e-05	9.1126e-05	1	1	1	P27824	P27824 [183-193]		0	1293.63								6211	Redundant	Heavy	Peak Found	High	High	-0.38	0.0001192	5.069e-06	3.29	41.54
	TRUE	High	[K].VTYKAPVPTGEVYFADSFDR.[G]		1.38045e-08	9.1126e-05	1	1	1	P27824	P27824 [58-77]		1	2262.11								6955	Redundant	Light	High	Peak Found	High	-0.42	0.0001192	5.269e-09	5.29	57.75
	TRUE	High	[K].VTYKAPVPTGEVYFADSFDR.[G]	1xLabel:13C(6)15N(2) [K4]; 1xLabel:13C(6)15N(4) [R20]	6.0983e-05	9.1126e-05	1	1	2	P27824	P27824 [58-77]		1	2280.13	1.044	0.964406	0	97.8	102.2	3.2922e+06	2.86053e+06	6955		Heavy	Peak Found	High	High	0.33	0.0001192	3.316e-05	4.13	57.75
	TRUE	High	[K].WEVEEMK.[E]		0.100624	0.00717624	1	1	1	P27824	P27824 [104-110]		0	950.429	1.334	0.1966	0	85.7	114.3	40023916	44426740	7026		Light	High	Peak Found	High	-0.05	0.005992	0.07569	2.19	29.28
	TRUE	High	[K].WEVEEMK.[E]	1xLabel:13C(6)15N(2) [K7]	0.00309148	0.000477939	1	1	1	P27824	P27824 [104-110]		0	958.443								7026	Redundant	Heavy	Peak Found	High	High	-0.42	0.0004125	0.001976	2.17	29.26
	TRUE	High	[K].WEVEEMK.[E]	1xOxidation [M6]; 1xLabel:13C(6)15N(2) [K7]	0.012061	0.00122778	1	1	2	P27824	P27824 [104-110]		0	974.438	1.28	0.300096	0	87.7	112.3	7826764	8.33786e+06	7027		Heavy	Peak Found	High	High	0.34	0.001157	0.008079	1.97	19.74
	TRUE	High	[K].WKPPMIDNPSYQGIWKPR.[K]		3.49826e-06	9.1126e-05	1	1	3	P27824	P27824 [383-400]		0	2213.13	0.881	0.334096	0	106.3	93.7	49828945	36529773	7036		Light	High	Peak Found	High	0.13	0.0001192	1.694e-06	2.92	56.9
	TRUE	High	[K].WKPPMIDNPSYQGIWKPR.[K]	1xOxidation [M5]	2.72346e-07	9.1126e-05	1	1	6	P27824	P27824 [383-400]		0	2229.13	0.88	0.33058	0	106.4	93.6	6.89153e+07	5.04566e+07	7035		Light	High	Peak Found	High	0.08	0.0001192	1.179e-07	4.45	53.45
	TRUE	High	[K].WKPPMIDNPSYQGIWKPR.[K]	2xLabel:13C(6)15N(2) [K2; K16]; 1xLabel:13C(6)15N(4) [R18]	1.28608e-05	9.1126e-05	1	1	3	P27824	P27824 [383-400]		0	2239.17								7036	Redundant	Heavy	Peak Found	High	High	0.11	0.0001192	6.568e-06	4.13	56.9
	TRUE	High	[K].WKPPMIDNPSYQGIWKPR.[K]	1xOxidation [M5]; 2xLabel:13C(6)15N(2) [K2; K16]; 1xLabel:13C(6)15N(4) [R18]	3.15958e-06	9.1126e-05	1	1	5	P27824	P27824 [383-400]		0	2255.16								7035	Redundant	Heavy	Peak Found	High	High	-0.26	0.0001192	1.517e-06	4.16	53.45
	TRUE	High	[K].YDGKWEVEEMK.[E]		0.000168785	9.1126e-05	1	1	2	P27824	P27824 [100-110]		1	1413.64	1.386	0.133891	0	83.8	116.2	2.62445e+07	30264583	7092		Light	High	Peak Found	High	0.4	0.0001192	9.615e-05	3.04	31.18
	TRUE	High	[K].YDGKWEVEEMK.[E]	2xLabel:13C(6)15N(2) [K4; K11]	0.000409671	9.1126e-05	1	1	3	P27824	P27824 [100-110]		1	1429.66								7092	Redundant	Heavy	Peak Found	High	High	0.44	0.0001192	0.0002413	2.82	31.18
	TRUE	High	[K].YDGKWEVEEMKESK.[L]	3xLabel:13C(6)15N(2) [K4; K11; K14]	0.00254456	0.000224419	1	1	1	P27824	P27824 [100-113]		2	1781.85	2.203	0.000881116	0	62.4	137.6	1.57152e+06	2.8809e+06	7093		Heavy	Peak Found	High	High	0.11	0.0002185	0.001619	3.29	25.46
TRUE	High	Master Protein	Q86UE4	Protein LYRIC OS=Homo sapiens OX=9606 GN=MTDH PE=1 SV=2	0	317.412	40	20	104	20	582	63.8	9.32	388.81	20	Pf15686	92140	ENSG00000147649	MTDH	hsa:92140; Q05DH2; Q52QU9; Q6PK07; Q86UE4; Q8TCX3	Gastric cancer network 2; ncRNAs involved in Wnt signaling in hepatocellular carcinoma; CCL18 signaling pathway			3	0	1.053	0.900441	13.52	102.1	97.9	3.78975e+08	3.02423e+08	High	High	1
	Checked	Confidence	Annotated Sequence	Modifications	Qvality PEP	Qvality q-value	# Protein Groups	# Proteins	# PSMs	Master Protein Accessions	Positions in Master Proteins	Modifications in Master Proteins	# Missed Cleavages	Theo. MH+ [Da]	Abundance Ratio: (Heavy) / (Light)	Abundance Ratio P-Value: (Heavy) / (Light)	Abundance Ratio Variability [%]: (Heavy) / (Light)	Abundances (Grouped): Light	Abundances (Grouped): Heavy	Abundance: F2: Light, Sample	Abundance: F2: Heavy, Sample	Precursor Quan Result ID	Quan Info	Quan Channel	Found in Sample: [S2] F2: Light, Sample	Found in Sample: [S4] F2: Heavy, Sample	Confidence (by Search Engine): Sequest HT	DeltaM [ppm] (by Search Engine): Sequest HT	Percolator q-Value (by Search Engine): Sequest HT	Percolator PEP (by Search Engine): Sequest HT	XCorr (by Search Engine): Sequest HT	Top Apex RT [min]
	TRUE	High	[R].EEAAAVPAAAPDDLALLK.[N]		5.61269e-06	9.1126e-05	1	1	4	Q86UE4	Q86UE4 [90-107]		0	1764.94	0.809	0.15239	0	110.6	89.4	9.43233e+07	6.3482e+07	1342		Light	High	Peak Found	High	0.09	0.0001192	2.762e-06	3.06	56.23
	TRUE	High	[R].EEAAAVPAAAPDDLALLK.[N]	1xLabel:13C(6)15N(2) [K18]	2.41409e-06	9.1126e-05	1	1	2	Q86UE4	Q86UE4 [90-107]		0	1772.95								1342	Redundant	Heavy	Peak Found	High	High	-0.06	0.0001192	1.15e-06	3.23	56.23
	TRUE	High	[K].EIREDLPVNTSK.[T]		0.00229997	0.000224419	1	1	1	Q86UE4	Q86UE4 [468-479]		1	1400.74	1.031	0.935362	0	98.5	101.5	1.385e+06	1.18815e+06	1592		Light	High	Peak Found	High	-0.5	0.0002185	0.001455	3.09	21.36
	TRUE	High	[K].EIREDLPVNTSK.[T]	1xLabel:13C(6)15N(2) [K12]; 1xLabel:13C(6)15N(4) [R3]	0.00145839	9.1126e-05	1	1	1	Q86UE4	Q86UE4 [468-479]		1	1418.76								1592	Redundant	Heavy	Peak Found	High	High	0.63	0.0001192	0.0009028	3.06	21.36
	TRUE	High	[K].GDSHLNVQVSNFK.[S]		0.000334254	9.1126e-05	1	1	2	Q86UE4	Q86UE4 [249-261]		0	1444.72	1.286	0.33004	0	87.5	112.5	5.84557e+06	6.25721e+06	2085		Light	High	Peak Found	High	-0.17	0.0001192	0.0001951	3.44	27.21
	TRUE	High	[K].GDSHLNVQVSNFK.[S]	1xLabel:13C(6)15N(2) [K13]	0.026814	0.00166208	1	1	1	Q86UE4	Q86UE4 [249-261]		0	1452.73								2085	Redundant	Heavy	Peak Found	High	High	-0.17	0.001546	0.01867	2.42	27.19
	TRUE	High	[K].KNKGDSHLNVQVSNFK.[S]		0.0385106	0.00255155	1	1	1	Q86UE4	Q86UE4 [246-261]		2	1814.95	1.415	0.168759	0	82.8	117.2	3.16285e+06	3723167	2730		Light	High	Peak Found	High	-0.29	0.002293	0.02719	2.05	18.49
	TRUE	High	[R].KREEAAAVPAAAPDDLALLK.[N]		0.0717989	0.00489315	1	1	2	Q86UE4	Q86UE4 [88-107]		2	2049.13	0.996	0.746704	0	100.2	99.8	7434779	6.16438e+06	2752		Light	High	Peak Found	High	-0.78	0.003983	0.05253	2.56	46.22
	TRUE	High	[R].KREEAAAVPAAAPDDLALLK.[N]	2xLabel:13C(6)15N(2) [K1; K20]; 1xLabel:13C(6)15N(4) [R2]	0.00159074	0.000224419	1	1	1	Q86UE4	Q86UE4 [88-107]		2	2075.17								2752	Redundant	Heavy	Peak Found	High	High	-0.15	0.0002185	0.0009932	2.6	46.22
	TRUE	High	[R].KTEPSAWSQDTGDANTNGKDWGR.[S]		1.36624e-09	9.1126e-05	1	1	2	Q86UE4	Q86UE4 [316-338]		2	2521.13								2757	Redundant	Light	High	Peak Found	High	-1.55	0.0001192	4.726e-10	5.25	26
	TRUE	High	[R].KTEPSAWSQDTGDANTNGKDWGR.[S]	2xLabel:13C(6)15N(2) [K1; K19]; 1xLabel:13C(6)15N(4) [R23]	2.78354e-07	9.1126e-05	1	1	3	Q86UE4	Q86UE4 [316-338]		2	2547.17	1.104	0.79489	0	95.1	104.9	30392586	27911033	2757		Heavy	Peak Found	High	High	-0.52	0.0001192	1.204e-07	5.44	25.97
	TRUE	High	[R].KTEPSAWSQDTGDANTNGKDWGR.[S]	1xDeamidated [N]; 2xLabel:13C(6)15N(2) [K1; K19]; 1xLabel:13C(6)15N(4) [R23]	0.000415667	9.1126e-05	1	1	3	Q86UE4	Q86UE4 [316-338]		2	2548.15	1.055	0.949424	0	97.3	102.7	8.27139e+06	7.2634e+06	2758		Heavy	Peak Found	High	High	2.69	0.0001192	0.0002456	4.64	27.86
	TRUE	High	[K].LSSQISAGEEKWNSVSPASAGK.[R]		0.00146899	9.1126e-05	1	1	1	Q86UE4	Q86UE4 [293-314]		1	2233.11	1.107	0.698768	0	94.9	105.1	1.13519e+06	1.0456e+06	3799		Light	High	Peak Found	High	-1.07	0.0001192	0.0009156	3.44	35.77
	TRUE	High	[K].NKGDSHLNVQVSNFK.[S]		2.09363e-05	9.1126e-05	1	1	3	Q86UE4	Q86UE4 [247-261]		1	1686.86	1.229	0.398527	0	89.7	110.3	1.97759e+07	2.022e+07	4703		Light	High	Peak Found	High	-0.25	0.0001192	1.086e-05	4.68	21.67
	TRUE	High	[K].NKGDSHLNVQVSNFK.[S]	2xLabel:13C(6)15N(2) [K2; K15]	8.43454e-06	9.1126e-05	1	1	3	Q86UE4	Q86UE4 [247-261]		1	1702.88								4703	Redundant	Heavy	Peak Found	High	High	0.07	0.0001192	4.214e-06	3.93	21.67
	TRUE	High	[K].NSQPIKTLPPATSTEPSVILSK.[S]		9.20379e-06	9.1126e-05	1	1	2	Q86UE4	Q86UE4 [505-526]		1	2308.28	0.637	0.0132433	0	122.1	77.9	8273831	4388047	4839		Light	High	Peak Found	High	0.06	0.0001192	4.641e-06	4.75	43.08
	TRUE	High	[K].NSQPIKTLPPATSTEPSVILSK.[S]	2xLabel:13C(6)15N(2) [K6; K22]	2.68413e-07	9.1126e-05	1	1	2	Q86UE4	Q86UE4 [505-526]		1	2324.3								4839	Redundant	Heavy	Peak Found	High	High	0.35	0.0001192	1.162e-07	4.34	43.08
	TRUE	High	[K].SDSDKSSSQVPPILQETDK.[S]		1.34345e-05	9.1126e-05	1	1	5	Q86UE4	Q86UE4 [527-545]		1	2061								5330	Redundant	Light	High	Peak Found	High	0.39	0.0001192	6.88e-06	3.89	32.53
	TRUE	High	[K].SDSDKSSSQVPPILQETDK.[S]	2xLabel:13C(6)15N(2) [K5; K19]	7.16537e-07	9.1126e-05	1	1	3	Q86UE4	Q86UE4 [527-545]		1	2077.03	0.957	0.607447	0	102.2	97.8	1.24409e+07	9.91077e+06	5330		Heavy	Peak Found	High	High	-1.76	0.0001192	3.246e-07	4.9	32.53
	TRUE	High	[K].SDSDKSSSQVPPILQETDKSK.[S]		0.00275471	0.000477939	1	1	2	Q86UE4	Q86UE4 [527-547]		2	2276.13	0.869	0.342857	0	107	93	6514683	4.71087e+06	5332		Light	High	Peak Found	High	-2.23	0.0004125	0.001755	3.04	25.77
	TRUE	High	[K].SGKGDSTLQVSSGLNENLTVNGGGWNEK.[S]		0.000638035	9.1126e-05	1	1	1	Q86UE4	Q86UE4 [262-289]		1	2848.37								5443	No Quan Values	Light	High	Not Found	High	-0.12	0.0001192	0.0003838	3.51
	TRUE	High	[K].SGKGDSTLQVSSGLNENLTVNGGGWNEK.[S]	1xDeamidated [N]	0.000295407	9.1126e-05	1	1	2	Q86UE4	Q86UE4 [262-289]		1	2849.35								5444	No Quan Values	Light	High	Not Found	High	4.83	0.0001192	0.0001715	4.68
	TRUE	High	[K].SGKGDSTLQVSSGLNENLTVNGGGWNEK.[S]	2xLabel:13C(6)15N(2) [K3; K28]	2.32788e-06	9.1126e-05	1	1	2	Q86UE4	Q86UE4 [262-289]		1	2864.4								5443	Redundant	Heavy	Not Found	High	High	-4.39	0.0001192	1.109e-06	3.6
	TRUE	High	[K].SGKGDSTLQVSSGLNENLTVNGGGWNEK.[S]	1xDeamidated [N17]; 2xLabel:13C(6)15N(2) [K3; K28]	4.16545e-06	9.1126e-05	1	1	1	Q86UE4	Q86UE4 [262-289]		1	2865.38								5444	Redundant	Heavy	Not Found	High	High	4.33	0.0001192	2.019e-06	5.46
	TRUE	High	[R].SIFSGIGSTAEPVSQSTTSDYQWDVSR.[N]		2.71818e-10	9.1126e-05	1	1	2	Q86UE4	Q86UE4 [344-370]		0	2905.35								5513	Redundant	Light	High	Peak Found	High	1.16	0.0001192	8.819e-11	6.69	64.28
	TRUE	High	[R].SIFSGIGSTAEPVSQSTTSDYQWDVSR.[N]	1xLabel:13C(6)15N(4) [R27]	4.88434e-11	9.1126e-05	1	1	2	Q86UE4	Q86UE4 [344-370]		0	2915.36	1.053	0.919949	0	97.4	102.6	3.1885e+06	2.79489e+06	5513		Heavy	Peak Found	High	High	0.19	0.0001192	1.472e-11	6.85	64.28
	TRUE	High	[K].SSSQVPPILQETDK.[S]		0.000182837	9.1126e-05	1	1	2	Q86UE4	Q86UE4 [532-545]		0	1528.79	0.912	0.385385	0	104.6	95.4	8766392	6649557	5772		Light	High	Peak Found	High	-0.43	0.0001192	0.0001043	2.17	37.02
	TRUE	High	[K].SSSQVPPILQETDK.[S]	1xLabel:13C(6)15N(2) [K14]	0.00128945	9.1126e-05	1	1	2	Q86UE4	Q86UE4 [532-545]		0	1536.8								5772	Redundant	Heavy	Peak Found	High	High	0.11	0.0001192	0.0007959	2.49	37.02
	TRUE	High	[R].SWQDELAQQAEEGSAR.[L]		1.21753e-11	9.1126e-05	1	1	3	Q86UE4	Q86UE4 [5-20]		0	1804.81	1.119	0.73788	0	94.4	105.6	53215177	49545678	5855		Light	High	Peak Found	High	0.8	0.0001192	3.454e-12	5.03	47.99
	TRUE	High	[R].SWQDELAQQAEEGSAR.[L]	1xLabel:13C(6)15N(4) [R16]	3.00955e-10	9.1126e-05	1	1	3	Q86UE4	Q86UE4 [5-20]		0	1814.82								5855	Redundant	Heavy	Peak Found	High	High	0.19	0.0001192	9.777e-11	5.69	47.99
	TRUE	High	[R].TELGLDLGLEPK.[R]		0.0671947	0.00461676	1	1	1	Q86UE4	Q86UE4 [34-45]		0	1284.7								5966	Redundant	Light	High	Peak Found	High	-1.67	0.003841	0.04904	2.51	55.3
	TRUE	High	[R].TELGLDLGLEPK.[R]	1xLabel:13C(6)15N(2) [K12]	0.000202426	9.1126e-05	1	1	2	Q86UE4	Q86UE4 [34-45]		0	1292.72	0.975	0.624138	0	101.3	98.7	8057407	6536189	5966		Heavy	Peak Found	High	High	0.77	0.0001192	0.0001163	3.45	55.3
	TRUE	High	[K].TEPSAWSQDTGDANTNGK.[D]		6.18765e-05	9.1126e-05	1	1	1	Q86UE4	Q86UE4 [317-334]		0	1878.81	0.815	0.441933	0	110.2	89.8	753142	510567	5976		Light	High	Peak Found	High	-1.07	0.0001192	3.377e-05	3.49	21.39
	TRUE	High	[K].TEPSAWSQDTGDANTNGK.[D]	1xLabel:13C(6)15N(2) [K18]	3.36299e-07	9.1126e-05	1	1	1	Q86UE4	Q86UE4 [317-334]		0	1886.82								5976	Redundant	Heavy	Peak Found	High	High	-0.63	0.0001192	1.466e-07	4.1	21.39
	TRUE	High	[K].TEPSAWSQDTGDANTNGKDWGR.[S]		2.33497e-05	9.1126e-05	1	1	3	Q86UE4	Q86UE4 [317-338]		1	2393.04	1.082	0.895706	0	96.1	103.9	9251780	8328041	5978		Light	High	Peak Found	High	0.09	0.0001192	1.224e-05	3.89	31.8
	TRUE	High	[K].TEPSAWSQDTGDANTNGKDWGR.[S]	1xDeamidated [N14]	0.0317107	0.00196171	1	1	1	Q86UE4	Q86UE4 [317-338]		1	2394.02	1.153	0.592892	0	92.9	107.1	2161375	2.0729e+06	5979		Light	High	Peak Found	High	1.33	0.001771	0.02225	2.62	33.93
	TRUE	High	[K].TEPSAWSQDTGDANTNGKDWGR.[S]	1xLabel:13C(6)15N(2) [K18]; 1xLabel:13C(6)15N(4) [R22]	0.00881365	0.000914196	1	1	1	Q86UE4	Q86UE4 [317-338]		1	2411.06								5978	Redundant	Heavy	Peak Found	High	High	0.06	0.0008339	0.005852	2.44	31.8
	TRUE	High	[K].TLPPATSTEPSVILSK.[S]		0.000119928	9.1126e-05	1	1	4	Q86UE4	Q86UE4 [511-526]		0	1640.91								6117	Redundant	Light	High	Peak Found	High	0.27	0.0001192	6.723e-05	2.94	41.76
	TRUE	High	[K].TLPPATSTEPSVILSK.[S]	1xLabel:13C(6)15N(2) [K16]	4.46062e-05	9.1126e-05	1	1	4	Q86UE4	Q86UE4 [511-526]		0	1648.92	0.454	4.88945e-06	0	137.5	62.5	39938108	15098388	6117		Heavy	Peak Found	High	High	0.4	0.0001192	2.4e-05	2.76	41.76
	TRUE	High	[K].TISTSDPAEVLVK.[N]		7.39953e-06	9.1126e-05	1	1	3	Q86UE4	Q86UE4 [492-504]		0	1359.74								6131	Redundant	Light	High	Peak Found	High	-0.39	0.0001192	3.698e-06	3.05	39.5
	TRUE	High	[K].TISTSDPAEVLVK.[N]	1xLabel:13C(6)15N(2) [K13]	0.000235812	9.1126e-05	1	1	2	Q86UE4	Q86UE4 [492-504]		0	1367.75	1.119	0.738701	0	94.4	105.6	54686800	50905644	6131		Heavy	Peak Found	High	High	0.12	0.0001192	0.0001363	2.53	39.5
TRUE	High	Master Protein	P11142	Heat shock cognate 71 kDa protein OS=Homo sapiens OX=9606 GN=HSPA8 PE=1 SV=1	0	313.789	38	23	121	16	646	70.9	5.52	398.72	23	Pf00012	3312	ENSG00000109971	HSPA8	hsa:3312; P11142; Q9H3R6	Parkin-ubiquitin proteasomal system pathway; MAPK signaling pathway; Exercise-induced circadian regulation	AUF1 (hnRNP D0) binds and destabilizes mRNA; Neutrophil degranulation; mRNA Splicing - Major Pathway; Clathrin-mediated endocytosis; Protein methylation; Golgi Associated Vesicle Biogenesis; HSP90 chaperone cycle for steroid hormone receptors (SHR) in the presence of ligand; Late endosomal microautophagy; Chaperone Mediated Autophagy; Regulation of HSF1-mediated heat shock response; Attenuation p…	Spliceosome; MAPK signaling pathway; Protein processing in endoplasmic reticulum; Endocytosis; Longevity regulating pathway; Antigen processing and presentation; Estrogen signaling pathway; Prion disease; Legionellosis; Toxoplasmosis; Measles; Lipid and atherosclerosis	32	7	1.124	0.615818	10.07	93.6	106.4	3.88968e+08	3.67813e+08	High	High	1
	Checked	Confidence	Annotated Sequence	Modifications	Qvality PEP	Qvality q-value	# Protein Groups	# Proteins	# PSMs	Master Protein Accessions	Positions in Master Proteins	Modifications in Master Proteins	# Missed Cleavages	Theo. MH+ [Da]	Abundance Ratio: (Heavy) / (Light)	Abundance Ratio P-Value: (Heavy) / (Light)	Abundance Ratio Variability [%]: (Heavy) / (Light)	Abundances (Grouped): Light	Abundances (Grouped): Heavy	Abundance: F2: Light, Sample	Abundance: F2: Heavy, Sample	Precursor Quan Result ID	Quan Info	Quan Channel	Found in Sample: [S2] F2: Light, Sample	Found in Sample: [S4] F2: Heavy, Sample	Confidence (by Search Engine): Sequest HT	DeltaM [ppm] (by Search Engine): Sequest HT	Percolator q-Value (by Search Engine): Sequest HT	Percolator PEP (by Search Engine): Sequest HT	XCorr (by Search Engine): Sequest HT	Top Apex RT [min]
	TRUE	High	[R].ARFEELNADLFR.[G]		5.0845e-05	9.1126e-05	2	2	2	P54652; P11142	P54652 [303-314]; P11142 [300-311]		1	1480.75	1.32	0.274227	0	86.2	113.8	5.2134e+06	5724362	577	Shared	Light	High	Peak Found	High	-0.1	0.0001192	2.739e-05	4.03	52.54
	TRUE	High	[R].ARFEELNADLFR.[G]	2xLabel:13C(6)15N(4) [R2; R12]	0.000128039	9.1126e-05	2	2	1	P54652; P11142	P54652 [303-314]; P11142 [300-311]		1	1500.77								577	Redundant	Heavy	Peak Found	High	High	1.25	0.0001192	7.19e-05	3.94	52.54
	TRUE	High	[K].DAGTIAGLNVLR.[I]		4.59783e-07	9.1126e-05	1	1	2	P11142	P11142 [160-171]		0	1199.67	1.185	0.516971	0	91.5	108.5	46021692	45388284	765		Light	High	Peak Found	High	0.32	0.0001192	2.044e-07	3.37	51.71
	TRUE	High	[K].DAGTIAGLNVLR.[I]	1xLabel:13C(6)15N(4) [R12]	2.86571e-07	9.1126e-05	1	1	2	P11142	P11142 [160-171]		0	1209.68								765	Redundant	Heavy	Peak Found	High	High	0.05	0.0001192	1.244e-07	3.75	51.71
	TRUE	High	[K].EIAEAYLGK.[T]	1xLabel:13C(6)15N(2) [K9]	0.0868047	0.00598494	1	1	1	P11142	P11142 [129-137]		0	1001.54	1.122	0.787794	0	94.2	105.8	6925969	6.46652e+06	1520		Heavy	Peak Found	High	High	0.65	0.004948	0.06443	1.81	27.83
	TRUE	High	[R].FDDAVVQSDMK.[H]		0.000551791	9.1126e-05	1	1	1	P11142	P11142 [78-88]		0	1254.57	1.219	0.413098	0	90.1	109.9	2.29133e+06	2.32349e+06	1857		Light	High	Peak Found	High	-0.61	0.0001192	0.0003292	2.54	29.88
	TRUE	High	[R].FDDAVVQSDMK.[H]	1xLabel:13C(6)15N(2) [K11]	0.0141029	0.00130832	1	1	1	P11142	P11142 [78-88]		0	1262.58								1857	Redundant	Heavy	Peak Found	High	High	-0.15	0.001212	0.009494	1.72	29.88
	TRUE	High	[R].FEELNADLFR.[G]		0.000175033	9.1126e-05	2	2	3	P54652; P11142	P54652 [305-314]; P11142 [302-311]		0	1253.62	1.168	0.569152	0	92.2	107.8	13742596	13358780	1864	Shared	Light	High	Peak Found	High	0.6	0.0001192	9.998e-05	2.62	56.01
	TRUE	High	[R].FEELNADLFR.[G]	1xLabel:13C(6)15N(4) [R10]	0.000638035	9.1126e-05	2	2	3	P54652; P11142	P54652 [305-314]; P11142 [302-311]		0	1263.62								1864	Redundant	Heavy	Peak Found	High	High	0.53	0.0001192	0.0003842	3.38	56.01
	TRUE	High	[K].HWPFMVVNDAGRPK.[V]		1.52026e-05	9.1126e-05	1	1	2	P11142	P11142 [89-102]		0	1653.83	0.904	0.638767	0	105	95	2.62609e+06	1.97558e+06	2618		Light	High	Peak Found	High	0.71	0.0001192	7.812e-06	3.88	47.62
	TRUE	High	[K].HWPFMVVNDAGRPK.[V]	1xLabel:13C(6)15N(2) [K14]; 1xLabel:13C(6)15N(4) [R12]	0.000324678	9.1126e-05	1	1	2	P11142	P11142 [89-102]		0	1671.85								2618	Redundant	Heavy	Peak Found	High	High	-0.67	0.0001192	0.0001898	3.14	47.62
	TRUE	High	[K].LDKSQIHDIVLVGGSTR.[I]		8.31274e-06	9.1126e-05	1	1	2	P11142	P11142 [326-342]		1	1838.01	1.117	0.811907	0	94.5	105.5	7295538	6.78389e+06	2933		Light	High	Peak Found	High	0.35	0.0001192	4.158e-06	3.28	39.19
	TRUE	High	[R].IINEPTAAAIAYGLDK.[KRG]		1.19859e-09	9.1126e-05	3	4	1	P54652; P11142; P11021	P54652 [173-188]; P11142 [172-187]; P11021 [198-213]		0	1659.9	0.971	0.685265	0	101.5	98.5	6039634	4879977	3417	Shared	Light	High	Peak Found	High	0.04	0.0001192	4.136e-10	3.9	55.24
	TRUE	High	[R].IINEPTAAAIAYGLDK.[KRG]	1xLabel:13C(6)15N(2) [K16]	0.000764989	9.1126e-05	3	4	1	P54652; P11142; P11021	P54652 [173-188]; P11142 [172-187]; P11021 [198-213]		0	1667.91								3417	Redundant	Heavy	Peak Found	High	High	0.53	0.0001192	0.0004614	2.59	55.24
	TRUE	High	[R].IINEPTAAAIAYGLDKK.[GV]		0.000143835	9.1126e-05	2	2	3	P54652; P11142	P54652 [173-189]; P11142 [172-188]		1	1787.99	1.003	0.794819	0	99.8	100.2	3.54795e+07	29612788	3419	Shared	Light	High	Peak Found	High	0.03	0.0001192	8.113e-05	2.25	48.75
	TRUE	High	[R].IINEPTAAAIAYGLDKK.[GV]	2xLabel:13C(6)15N(2) [K16; K17]	0.00267637	0.000224419	2	2	2	P54652; P11142	P54652 [173-189]; P11142 [172-188]		1	1804.02								3419	Redundant	Heavy	Peak Found	High	High	0.58	0.0002185	0.001701	2.82	48.75
	TRUE	High	[K].LLQDFFNGK.[E]	1xLabel:13C(6)15N(2) [K9]	0.00162565	0.000224419	2	3	1	P54652; P11142	P54652 [352-360]; P11142 [349-357]		0	1089.58	1.199	0.478072	0	90.9	109.1	9088014	9067615	3443	Shared	Heavy	Peak Found	High	High	-0.16	0.0002185	0.001015	1.72	50.97
	TRUE	High	[K].LYQSAGGMPGGMPGGFPGGGAPPSGGASSGPTIEEVD.[-]		9.17565e-07	9.1126e-05	1	1	2	P11142	P11142 [610-646]		0	3346.5									Indistinguishable Channels		Not Found	Not Found	High	-0.18	0.0001192	4.186e-07	5.81	66.86
	TRUE	High	[K].LYQSAGGMPGGMPGGFPGGGAPPSGGASSGPTIEEVD.[-]	1xOxidation [M]	8.40875e-07	9.1126e-05	1	1	5	P11142	P11142 [610-646]		0	3362.49									Indistinguishable Channels		Not Found	Not Found	High	0.01	0.0001192	3.823e-07	5.23	61.35
	TRUE	High	[K].LYQSAGGMPGGMPGGFPGGGAPPSGGASSGPTIEEVD.[-]	2xOxidation [M8; M12]	0.000103696	9.1126e-05	1	1	2	P11142	P11142 [610-646]		0	3378.49									Indistinguishable Channels		Not Found	Not Found	High	0.41	0.0001192	5.757e-05	4.92	55.13
	TRUE	High	[K].MKEIAEAYLGK.[T]		8.521e-05	9.1126e-05	1	1	1	P11142	P11142 [127-137]		1	1252.66	4.761	5.11591e-13	0	34.7	165.3	1.6656e+06	6.59925e+06	4331		Light	High	Peak Found	High	0.15	0.0001192	4.698e-05	3.31	29.53
	TRUE	High	[K].MKEIAEAYLGK.[T]	2xLabel:13C(6)15N(2) [K2; K11]	7.84285e-06	9.1126e-05	1	1	3	P11142	P11142 [127-137]		1	1268.69								4331	Redundant	Heavy	Peak Found	High	High	0.18	0.0001192	3.911e-06	2.53	29.53
	TRUE	High	[R].MVNHFIAEFK.[R]		0.000456837	9.1126e-05	1	1	2	P11142	P11142 [237-246]		0	1235.62	1.337	0.212625	0	85.6	114.4	4.05824e+06	4516395	4566		Light	High	Peak Found	High	0.32	0.0001192	0.0002707	2.43	41
	TRUE	High	[R].MVNHFIAEFK.[R]	1xOxidation [M1]	0.00662085	0.000694413	1	1	2	P11142	P11142 [237-246]		0	1251.62								4567	Redundant	Light	High	Peak Found	High	-0.01	0.0006708	0.00435	2.42	34.25
	TRUE	High	[R].MVNHFIAEFK.[R]	1xOxidation [M1]; 1xLabel:13C(6)15N(2) [K10]	0.0366907	0.00245725	1	1	1	P11142	P11142 [237-246]		0	1259.63	1.211	0.486437	0	90.5	109.5	3.17551e+06	3.20014e+06	4567		Heavy	Peak Found	High	High	-0.61	0.002224	0.02585	2.09	34.25
	TRUE	High	[K].NQVAMNPTNTVFDAK.[R]		8.1426e-08	9.1126e-05	1	1	2	P11142	P11142 [57-71]		0	1649.8	1.009	0.819529	0	99.6	100.4	14904035	12512750	4814		Light	High	Peak Found	High	-0.42	0.0001192	3.345e-08	4.96	38.9
	TRUE	High	[K].NQVAMNPTNTVFDAK.[R]	1xLabel:13C(6)15N(2) [K15]	9.37807e-07	9.1126e-05	1	1	2	P11142	P11142 [57-71]		0	1657.81								4814	Redundant	Heavy	Peak Found	High	High	-0.21	0.0001192	4.289e-07	5.07	38.9
	TRUE	High	[K].NQVAMNPTNTVFDAK.[R]	1xOxidation [M5]	1.50464e-06	9.1126e-05	1	1	2	P11142	P11142 [57-71]		0	1665.79	0.915	0.448138	0	104.4	95.6	13313089	10139014	4813		Light	High	Peak Found	High	-0.03	0.0001192	6.988e-07	4.5	30.08
	TRUE	High	[K].NQVAMNPTNTVFDAK.[R]	1xOxidation [M5]; 1xLabel:13C(6)15N(2) [K15]	2.1423e-07	9.1126e-05	1	1	2	P11142	P11142 [57-71]		0	1673.8								4813	Redundant	Heavy	Peak Found	High	High	0.6	0.0001192	9.191e-08	4.67	30.08
	TRUE	High	[K].NQVAMNPTNTVFDAKR.[L]		0.000177597	9.1126e-05	1	1	2	P11142	P11142 [57-72]		1	1805.9								4815	Redundant	Light	High	Peak Found	High	-1.02	0.0001192	0.000101	3.81	32.09
	TRUE	High	[K].NQVAMNPTNTVFDAKR.[L]	1xOxidation [M5]	0.000354261	9.1126e-05	1	1	2	P11142	P11142 [57-72]		1	1821.89								4816	Redundant	Light	High	Peak Found	High	-0.52	0.0001192	0.0002079	3.55	24.12
	TRUE	High	[K].NQVAMNPTNTVFDAKR.[L]	1xLabel:13C(6)15N(2) [K15]; 1xLabel:13C(6)15N(4) [R16]	1.2492e-05	9.1126e-05	1	1	1	P11142	P11142 [57-72]		1	1823.92	1.05	0.992524	0	97.5	102.5	15576075	13613479	4815		Heavy	Peak Found	High	High	-0.54	0.0001192	6.354e-06	4.12
	TRUE	High	[K].NQVAMNPTNTVFDAKR.[L]	1xOxidation [M5]; 1xLabel:13C(6)15N(2) [K15]; 1xLabel:13C(6)15N(4) [R16]	2.12431e-05	9.1126e-05	1	1	2	P11142	P11142 [57-72]		1	1839.91	1.075	0.905367	0	96.4	103.6	13900216	12438537	4816		Heavy	Peak Found	High	High	-0.18	0.0001192	1.106e-05	3.56	24.12
	TRUE	High	[K].NSLESYAFNMK.[A]		0.000135707	9.1126e-05	1	1	2	P11142	P11142 [540-550]		0	1303.6	1.201	0.471017	0	90.9	109.1	20128060	20118424	4833		Light	High	Peak Found	High	0.26	0.0001192	7.651e-05	3.54	46.28
	TRUE	High	[K].NSLESYAFNMK.[A]	1xLabel:13C(6)15N(2) [K11]	6.18765e-05	9.1126e-05	1	1	1	P11142	P11142 [540-550]		0	1311.61								4833	Redundant	Heavy	Peak Found	High	High	-0.33	0.0001192	3.38e-05	3.69	46.28
	TRUE	High	[K].NSLESYAFNMK.[A]	1xOxidation [M10]	0.000846787	9.1126e-05	1	1	3	P11142	P11142 [540-550]		0	1319.59	1.173	0.553488	0	92	108	13082228	12771291	4832		Light	High	Peak Found	High	-0.02	0.0001192	0.0005158	2.81	35.45
	TRUE	High	[K].NSLESYAFNMK.[A]	1xOxidation [M10]; 1xLabel:13C(6)15N(2) [K11]	5.23458e-05	9.1126e-05	1	1	2	P11142	P11142 [540-550]		0	1327.61								4832	Redundant	Heavy	Peak Found	High	High	-0.4	0.0001192	2.823e-05	3.38	35.45
	TRUE	High	[R].QATKDAGTIAGLNVLR.[I]		0.0115568	0.00122778	1	1	1	P11142	P11142 [156-171]		1	1627.91	1.102	0.815231	0	95.1	104.9	3.49336e+06	3203403	4919		Light	High	Peak Found	High	1.6	0.001157	0.007744	2.39	39.96
	TRUE	High	[R].RFDDAVVQSDMK.[H]		0.0118063	0.00122778	1	1	1	P11142	P11142 [77-88]		1	1410.67								5202	Redundant	Light	High	Peak Found	High	-0.05	0.001157	0.007918	2.12
	TRUE	High	[R].RFDDAVVQSDMK.[H]	1xLabel:13C(6)15N(2) [K12]; 1xLabel:13C(6)15N(4) [R1]	0.00226699	0.000224419	1	1	2	P11142	P11142 [77-88]		1	1428.69	100	1e-17			200		3.18302e+06	5202		Heavy	Not Found	High	High	0.61	0.0002185	0.00143	3.26	25.42
	TRUE	High	[K].SFYPEEVSSMVLTK.[M]		1.13303e-06	9.1126e-05	1	1	3	P11142	P11142 [113-126]		0	1616.79	1.07	0.925413	0	96.6	103.4	1.41043e+07	1.25627e+07	5417		Light	High	Peak Found	High	0.31	0.0001192	5.231e-07	4.18	59.45
	TRUE	High	[K].SFYPEEVSSMVLTK.[M]	1xLabel:13C(6)15N(2) [K14]	3.04674e-06	9.1126e-05	1	1	3	P11142	P11142 [113-126]		0	1624.8								5417	Redundant	Heavy	Peak Found	High	High	0.07	0.0001192	1.459e-06	3.03	59.45
	TRUE	High	[K].SFYPEEVSSMVLTK.[M]	1xOxidation [M10]	5.12161e-05	9.1126e-05	1	1	1	P11142	P11142 [113-126]		0	1632.78								5416	Redundant	Light	High	Peak Found	High	0.14	0.0001192	2.777e-05	3.22	49.35
	TRUE	High	[K].SFYPEEVSSMVLTK.[M]	1xOxidation [M10]; 1xLabel:13C(6)15N(2) [K14]	0.000104452	9.1126e-05	1	1	2	P11142	P11142 [113-126]		0	1640.8	1.028	0.901558	0	98.6	101.4	4.91305e+06	4.20215e+06	5416		Heavy	Peak Found	High	High	0.32	0.0001192	5.817e-05	3.66	49.35
	TRUE	High	[K].SQIHDIVLVGGSTR.[I]		3.21559e-05	9.1126e-05	1	1	1	P11142	P11142 [329-342]		0	1481.81	1.166	0.609409	0	92.3	107.7	8.30935e+06	8.06219e+06	5684		Light	High	Peak Found	High	-0.52	0.0001192	1.701e-05	2.62	33.12
	TRUE	High	[K].SQIHDIVLVGGSTR.[I]	1xLabel:13C(6)15N(4) [R14]	3.19229e-05	9.1126e-05	1	1	3	P11142	P11142 [329-342]		0	1491.82								5684	Redundant	Heavy	Peak Found	High	High	2.62	0.0001192	1.693e-05	2.97	32.92
	TRUE	High	[K].STAGDTHLGGEDFDNR.[M]		9.68451e-06	9.1126e-05	2	2	2	P54652; P11142	P54652 [224-239]; P11142 [221-236]		0	1691.73	1.126	0.71354	0	94.1	105.9	1.80528e+07	1.69084e+07	5779	Shared	Light	High	Peak Found	High	0.54	0.0001192	4.862e-06	3.57	20.47
	TRUE	High	[K].STAGDTHLGGEDFDNR.[M]	1xLabel:13C(6)15N(4) [R16]	3.66535e-05	9.1126e-05	2	2	2	P54652; P11142	P54652 [224-239]; P11142 [221-236]		0	1701.73								5779	Redundant	Heavy	Peak Found	High	High	0.23	0.0001192	1.96e-05	2.7	20.47
	TRUE	High	[R].TTPSYVAFTDTER.[L]		1.05677e-05	9.1126e-05	3	6	2	P54652; P11142; P0DMV9	P54652 [38-50]; P11142 [37-49]; P0DMV9 [37-49]		0	1487.7	1.152	0.620762	0	92.9	107.1	72766840	69772288	6289	Shared	Light	High	Peak Found	High	-0.26	0.0001192	5.34e-06	3.33	37.84
	TRUE	High	[R].TTPSYVAFTDTER.[L]	1xLabel:13C(6)15N(4) [R13]	4.52598e-05	9.1126e-05	3	6	3	P54652; P11142; P0DMV9	P54652 [38-50]; P11142 [37-49]; P0DMV9 [37-49]		0	1497.71								6289	Redundant	Heavy	Peak Found	High	High	-0.07	0.0001192	2.441e-05	3.5	37.84
	TRUE	High	[K].TVTNAVVTVPAYFNDSQR.[Q]		2.05946e-08	9.1126e-05	1	1	4	P11142	P11142 [138-155]		0	1982								6347	Redundant	Light	High	Peak Found	High	0.11	0.0001192	7.982e-09	5	53
	TRUE	High	[K].TVTNAVVTVPAYFNDSQR.[Q]	1xLabel:13C(6)15N(4) [R18]	2.03596e-07	9.1126e-05	1	1	5	P11142	P11142 [138-155]		0	1992.01	1.042	0.95601	0	98	102	32801326	28428083	6347		Heavy	Peak Found	High	High	0.25	0.0001192	8.746e-08	4.32	53
TRUE	High	Master Protein	P08238	Heat shock protein HSP 90-beta OS=Homo sapiens OX=9606 GN=HSP90AB1 PE=1 SV=4	0	306.871	40	25	110	16	724	83.2	5.03	359.47	25	Pf00183, Pf02518	3326	ENSG00000096384	HSP90AB1	B2R5P0; hsa:3326; P08238; Q5T9W7; Q9NQW0; Q9NTK6	Nuclear receptors meta-pathway; NRF2 pathway; Focal adhesion: PI3K-Akt-mTOR-signaling pathway; PI3K-Akt signaling pathway	The role of GTSE1 in G2/M progression after G2 checkpoint; HSP90 chaperone cycle for steroid hormone receptors (SHR) in the presence of ligand; Regulation of actin dynamics for phagocytic cup formation; Neutrophil degranulation; Chaperone Mediated Autophagy; Potential therapeutics for SARS; Estrogen-dependent gene expression; Sema3A PAK dependent Axon repulsion; DDX58/IFIH1-mediated induction of …	Protein processing in endoplasmic reticulum; PI3K-Akt signaling pathway; Necroptosis; Antigen processing and presentation; NOD-like receptor signaling pathway; IL-17 signaling pathway; Th17 cell differentiation; Progesterone-mediated oocyte maturation; Estrogen signaling pathway; Salmonella infection; Pathways in cancer; Chemical carcinogenesis; Prostate cancer; Lipid and atherosclerosis; Fluid s…	37	10	1.087	0.759984	16.04	93	107	4.02665e+08	3.85842e+08	High	High	1
	Checked	Confidence	Annotated Sequence	Modifications	Qvality PEP	Qvality q-value	# Protein Groups	# Proteins	# PSMs	Master Protein Accessions	Positions in Master Proteins	Modifications in Master Proteins	# Missed Cleavages	Theo. MH+ [Da]	Abundance Ratio: (Heavy) / (Light)	Abundance Ratio P-Value: (Heavy) / (Light)	Abundance Ratio Variability [%]: (Heavy) / (Light)	Abundances (Grouped): Light	Abundances (Grouped): Heavy	Abundance: F2: Light, Sample	Abundance: F2: Heavy, Sample	Precursor Quan Result ID	Quan Info	Quan Channel	Found in Sample: [S2] F2: Light, Sample	Found in Sample: [S4] F2: Heavy, Sample	Confidence (by Search Engine): Sequest HT	DeltaM [ppm] (by Search Engine): Sequest HT	Percolator q-Value (by Search Engine): Sequest HT	Percolator PEP (by Search Engine): Sequest HT	XCorr (by Search Engine): Sequest HT	Top Apex RT [min]
	TRUE	High	[K].ADLINNLGTIAK.[SF]		2.63427e-06	9.1126e-05	2	4	2	P07900; P08238	P07900 [101-112]; P08238 [96-107]		0	1242.71	1.151	0.626013	0	93	107	60629524	58055184	113	Shared	Light	High	Peak Found	High	-0.14	0.0001192	1.257e-06	3.09	47.31
	TRUE	High	[K].ADLINNLGTIAK.[SF]	1xLabel:13C(6)15N(2) [K12]	8.70894e-05	9.1126e-05	2	4	2	P07900; P08238	P07900 [101-112]; P08238 [96-107]		0	1250.72								113	Redundant	Heavy	Peak Found	High	High	0.03	0.0001192	4.796e-05	3.32	47.31
	TRUE	High	[R].ALLFIPR.[R]		0.00130826	9.1126e-05	1	1	2	P08238	P08238 [331-337]		0	829.529	1.12	0.73454	0	94.3	105.7	17383744	16198214	367		Light	High	Peak Found	High	-0.13	0.0001192	0.000811	2.11	51.1
	TRUE	High	[R].ALLFIPR.[R]	1xLabel:13C(6)15N(4) [R7]	0.00389246	0.000477939	1	1	2	P08238	P08238 [331-337]		0	839.538								367	Redundant	Heavy	Peak Found	High	High	-0.21	0.0004125	0.002517	2.04	51.1
	TRUE	High	[K].AQALRDNSTMGYMMAK.[K]		0.0295737	0.00186923	1	2	1	P08238	P08238 [608-623]		1	1787.82	1.11	0.709882	0	94.8	105.2	2.61858e+06	2418514	533		Light	High	Peak Found	High	-0.17	0.001704	0.02068	2.22	31.22
	TRUE	High	[K].AQALRDNSTMGYMMAK.[K]	1xOxidation [M13]	0.0564566	0.0037862	1	2	1	P08238	P08238 [608-623]		1	1803.82								534	No Quan Values	Light	High	Not Found	High	-1.08	0.003217	0.04095	2.18
	TRUE	High	[R].DNSTMGYMMAK.[K]		0.0568386	0.00387987	1	2	1	P08238	P08238 [613-623]		0	1248.51	1.345	0.26299	0	85.3	114.7	2827595	3.16451e+06	1064		Light	High	Peak Found	High	0.94	0.003217	0.04102	2.79	32.46
	TRUE	High	[R].DNSTMGYMMAK.[K]	1xOxidation [M8]	0.0808108	0.00544161	1	2	1	P08238	P08238 [613-623]		0	1264.5								1063	No Quan Values	Light	High	Not Found	High	-0.9	0.004538	0.05965	2.6
	TRUE	High	[K].EGLELPEDEEEK.[K]		1.86364e-05	9.1126e-05	2	5	2	P07900; P08238	P07900 [547-558]; P08238 [539-550]		0	1416.64	0.948	0.569756	0	102.7	97.3	34564636	27259810	1474	Shared	Light	High	Peak Found	High	-0.08	0.0001192	9.658e-06	2.6	32.76
	TRUE	High	[K].EGLELPEDEEEK.[K]	1xLabel:13C(6)15N(2) [K12]	2.74013e-05	9.1126e-05	2	5	1	P07900; P08238	P07900 [547-558]; P08238 [539-550]		0	1424.65								1474	Redundant	Heavy	Peak Found	High	High	0.15	0.0001192	1.439e-05	2.66	32.76
	TRUE	High	[R].ELISNASDALDK.[I]		0.00122568	9.1126e-05	2	2	1	P14625; P08238	P14625 [103-114]; P08238 [42-53]		0	1275.64	1.016	0.861946	0	99.2	100.8	5821888	4.92011e+06	1573	Shared	Light	High	Peak Found	High	-1.06	0.0001192	0.0007556	2.99	32.2
	TRUE	High	[R].GVVDSEDIPLNLSR.[E]		7.8518e-08	9.1126e-05	3	3	2	P07900; P08238; Q12931	P07900 [387-400]; P08238 [379-392]; Q12931 [389-402]		0	1513.79	0.982	0.70621	0	100.9	99.1	42481568	34703472	2506	Shared	Light	High	Peak Found	High	0.6	0.0001192	3.229e-08	4.38	50.1
	TRUE	High	[R].GVVDSEDIPLNLSR.[E]	1xLabel:13C(6)15N(4) [R14]	1.1413e-06	9.1126e-05	3	3	2	P07900; P08238; Q12931	P07900 [387-400]; P08238 [379-392]; Q12931 [389-402]		0	1523.79								2506	Redundant	Heavy	Peak Found	High	High	-0.18	0.0001192	5.238e-07	3.87	50.1
	TRUE	High	[K].HLEINPDHPIVETLR.[Q]		0.000748514	9.1126e-05	1	1	2	P08238	P08238 [625-639]		0	1782.95								2574	Redundant	Light	High	Peak Found	High	0.17	0.0001192	0.0004539	3.36	43.36
	TRUE	High	[K].HLEINPDHPIVETLR.[Q]	1xLabel:13C(6)15N(4) [R15]	0.000280754	9.1126e-05	1	1	1	P08238	P08238 [625-639]		0	1792.96	1.092	0.858835	0	95.6	104.4	5.17225e+06	4.70058e+06	2574		Heavy	Peak Found	High	High	-0.59	0.0001192	0.0001631	2.4	43.36
	TRUE	High	[K].HNDDEQYAWESSAGGSFTVR.[TA]		0.00868865	0.000914196	2	3	1	P07900; P08238	P07900 [154-173]; P08238 [149-168]		0	2255.96	0.799	0.50762	0	111.2	88.8	79527.6	52880.5	2584	Shared	Light	High	Peak Found	High	1.18	0.0008339	0.005751	2.83	117.56
	TRUE	High	[K].HNDDEQYAWESSAGGSFTVR.[TA]	1xLabel:13C(6)15N(4) [R20]	0.0121472	0.00122778	2	3	1	P07900; P08238	P07900 [154-173]; P08238 [149-168]		0	2265.97								2584	Redundant	Heavy	Peak Found	High	High	-3.55	0.001157	0.008148	2.45	117.56
	TRUE	High	[K].HSQFIGYPITLYLEK.[E]		2.05082e-07	9.1126e-05	1	3	3	P08238	P08238 [205-219]		0	1808.96	1.098	0.744724	0	95.3	104.7	2.65762e+06	2.42912e+06	2606		Light	High	Peak Found	High	-0.3	0.0001192	8.812e-08	3.56	66.6
	TRUE	High	[K].HSQFIGYPITLYLEK.[E]	1xLabel:13C(6)15N(2) [K15]	3.28652e-05	9.1126e-05	1	2	2	P08238	P08238 [205-219]		0	1816.97								2606	Redundant	Heavy	Peak Found	High	High	-0.52	0.0001192	1.741e-05	4.07	66.56
	TRUE	High	[K].KHLEINPDHPIVETLR.[Q]		7.29267e-06	9.1126e-05	1	1	2	P08238	P08238 [624-639]		1	1911.04								2674	Redundant	Light	High	Peak Found	High	-0.13	0.0001192	3.638e-06	3.04	39.34
	TRUE	High	[K].KHLEINPDHPIVETLR.[Q]	1xLabel:13C(6)15N(2) [K1]; 1xLabel:13C(6)15N(4) [R16]	1.37889e-06	9.1126e-05	1	1	4	P08238	P08238 [624-639]		1	1929.07	0.974	0.675172	0	101.3	98.7	2.8039e+07	2.27286e+07	2674		Heavy	Peak Found	High	High	-0.06	0.0001192	6.386e-07	4.19	39.66
	TRUE	High	[K].IDIIPNPQER.[T]		0.00415274	0.000596234	1	2	1	P08238	P08238 [73-82]		0	1194.65	0.884	0.342701	0	106.2	93.8	28159294	20708482	2942		Light	High	Peak Found	High	0.38	0.0005035	0.002689	2.71	37.97
	TRUE	High	[K].IDIIPNPQER.[T]	1xLabel:13C(6)15N(4) [R10]	0.0326063	0.0020598	1	2	2	P08238	P08238 [73-82]		0	1204.66								2942	Redundant	Heavy	Peak Found	High	High	-0.4	0.001771	0.02284	2.09	37.97
	TRUE	High	[K].LGLGIDEDEVAAEEPNAAVPDEIPPLEGDEDASR.[M]		0.00010911	9.1126e-05	1	1	1	P08238	P08238 [686-719]		0	3532.64	0.675	0.17603	0	119.4	80.6	562538	316142	3173		Light	High	Peak Found	High	-0.63	0.0001192	6.096e-05	3.94	70.02
	TRUE	High	[K].LGLGIDEDEVAAEEPNAAVPDEIPPLEGDEDASR.[M]	1xLabel:13C(6)15N(4) [R34]	0.00526358	0.000694413	1	1	1	P08238	P08238 [686-719]		0	3542.65								3173	Redundant	Heavy	Peak Found	High	High	-0.14	0.0005813	0.003438	4.06	70.02
	TRUE	High	[R].NPDDITQEEYGEFYK.[S]		8.5679e-08	9.1126e-05	1	1	2	P08238	P08238 [292-306]		0	1847.8								4786	Redundant	Light	High	Peak Found	High	-0.43	0.0001192	3.541e-08	4.92	46.47
	TRUE	High	[R].NPDDITQEEYGEFYK.[S]	1xLabel:13C(6)15N(2) [K15]	3.83339e-07	9.1126e-05	1	1	2	P08238	P08238 [292-306]		0	1855.81	1.053	0.996022	0	97.4	102.6	20635828	18083344	4786		Heavy	Peak Found	High	High	-1.03	0.0001192	1.682e-07	4.92	46.47
	TRUE	High	[R].RAPFDLFENK.[K]		0.0486325	0.00301856	1	2	2	P08238	P08238 [338-347]		1	1236.64	0.961	0.582031	0	102	98	8854802	7080870	5192		Light	High	Peak Found	High	-0.35	0.002641	0.03494	2.58	46.44
	TRUE	High	[R].RAPFDLFENKK.[K]		0.00820595	0.000914196	1	2	1	P08238	P08238 [338-348]		2	1364.73	1.209	0.454788	0	90.5	109.5	4.22323e+06	4.24942e+06	5193		Light	High	Peak Found	High	-0.39	0.0008339	0.005423	3.4	36.62
	TRUE	High	[R].RAPFDLFENKK.[K]	2xLabel:13C(6)15N(2) [K10; K11]; 1xLabel:13C(6)15N(4) [R1]	0.000890901	9.1126e-05	1	2	2	P08238	P08238 [338-348]		2	1390.77								5193	Redundant	Heavy	Peak Found	High	High	-0.82	0.0001192	0.0005427	3.33	36.62
	TRUE	High	[K].SLTNDWEDHLAVK.[H]		5.31128e-05	9.1126e-05	2	2	2	P07900; P08238	P07900 [315-327]; P08238 [307-319]		0	1527.74	1.081	0.883087	0	96.1	103.9	34407773	3.09494e+07	5570	Shared	Light	High	Peak Found	High	0.07	0.0001192	2.875e-05	3.68	43.88
	TRUE	High	[K].SIYYITGESK.[E]		0.000160409	9.1126e-05	1	2	1	P08238	P08238 [482-491]		0	1160.58	100	1e-17			200		26772482	5582		Light	High	Peak Found	High	0.18	0.0001192	9.105e-05	3.18	30.14
	TRUE	High	[K].SIYYITGESK.[E]	1xLabel:13C(6)15N(2) [K10]	0.00016158	9.1126e-05	1	2	2	P08238	P08238 [482-491]		0	1168.6								5582	Redundant	Heavy	Not Found	High	High	0.15	0.0001192	9.132e-05	3.04	30.14
	TRUE	High	[K].TKPIWTRNPDDITQEEYGEFYK.[S]		0.00378205	0.000477939	1	1	2	P08238	P08238 [285-306]		1	2730.3	0.953	0.792739	0	102.4	97.6	2718775	2156324	6055		Light	High	Peak Found	High	-0.55	0.0004125	0.00243	3.03	53.18
	TRUE	High	[K].TKPIWTRNPDDITQEEYGEFYK.[S]	2xLabel:13C(6)15N(2) [K2; K22]; 1xLabel:13C(6)15N(4) [R7]	2.74013e-05	9.1126e-05	1	1	1	P08238	P08238 [285-306]		1	2756.34								6055	Redundant	Heavy	Peak Found	High	High	2.66	0.0001192	1.438e-05	3.35
	TRUE	High	[R].TLTLVDTGIGMTK.[A]		4.9808e-07	9.1126e-05	1	1	3	P08238	P08238 [83-95]		0	1349.73								6136	Redundant	Light	High	Peak Found	High	0.25	0.0001192	2.208e-07	3.55	50.28
	TRUE	High	[R].TLTIVDTGIGMTK.[A]	1xLabel:13C(6)15N(2) [K13]	8.62061e-06	9.1126e-05	2	3	5	P07900; P08238	P07900 [88-100]; P08238 [83-95]		0	1357.75	1.427	0.0969662	0	82.4	117.6	1.85958e+07	22087583	6136	Shared	Heavy	Peak Found	High	High	0.18	0.0001192	4.338e-06	3.48	50.28
	TRUE	High	[R].TLTLVDTGIGMTK.[A]	1xOxidation [M11]	0.000165143	9.1126e-05	1	1	2	P08238	P08238 [83-95]		0	1365.73	1.315	0.224486	0	86.4	113.6	12520656	13703674	6137		Light	High	Peak Found	High	0.51	0.0001192	9.4e-05	3.41	42.28
	TRUE	High	[R].TLTLVDTGIGMTK.[A]	1xOxidation [M11]; 1xLabel:13C(6)15N(2) [K13]	2.26113e-06	9.1126e-05	1	1	3	P08238	P08238 [83-95]		0	1373.74								6137	Redundant	Heavy	Peak Found	High	High	0.76	0.0001192	1.068e-06	3.66	42.28
	TRUE	High	[K].VILHLKEDQTEYLEER.[RW]		1.36889e-06	9.1126e-05	2	4	4	P07900; P08238	P07900 [186-201]; P08238 [181-196]		1	2015.04	1.238	0.451616	0	89.4	110.6	3.27946e+06	3.3777e+06	6709	Shared	Light	High	Peak Found	High	-0.27	0.0001192	6.335e-07	3.95	40.93
	TRUE	High	[K].VILHLKEDQTEYLEER.[RW]	1xLabel:13C(6)15N(2) [K6]; 1xLabel:13C(6)15N(4) [R16]	1.69034e-06	9.1126e-05	2	4	2	P07900; P08238	P07900 [186-201]; P08238 [181-196]		1	2033.07								6709	Redundant	Heavy	Peak Found	High	High	-0.15	0.0001192	7.901e-07	3.89	117.86
	TRUE	High	[K].VILHLKEDQTEYLEERR.[IV]		0.00136638	9.1126e-05	2	3	2	P07900; P08238	P07900 [186-202]; P08238 [181-197]		2	2171.15	1.265	0.34342	0	88.3	111.7	218444	229943	6710	Shared	Light	High	Peak Found	High	-0.33	0.0001192	0.000846	2.77	118.33
	TRUE	High	[K].VILHLKEDQTEYLEERR.[IV]	1xLabel:13C(6)15N(2) [K6]; 2xLabel:13C(6)15N(4) [R16; R17]	0.00298207	0.000477939	2	3	1	P07900; P08238	P07900 [186-202]; P08238 [181-197]		2	2199.18								6710	Redundant	Heavy	Peak Found	High	High	0.47	0.0004125	0.001903	2.87	118.33
	TRUE	High	[R].YESLTDPSKLDSGK.[E]		0.0335263	0.0020598	2	4	2	P07900; P08238	P07900 [61-74]; P08238 [56-69]		1	1539.75	1.007	0.811218	0	99.7	100.3	2.92919e+07	24543814	7129	Shared	Light	High	Peak Found	High	-1.17	0.001844	0.02354	2.84	25.49
	TRUE	High	[R].YESLTDPSKLDSGK.[E]	2xLabel:13C(6)15N(2) [K9; K14]	0.00518857	0.000694413	2	4	2	P07900; P08238	P07900 [61-74]; P08238 [56-69]		1	1555.78								7129	Redundant	Heavy	Peak Found	High	High	1	0.0005813	0.00338	3.54	25.46
	TRUE	High	[R].YESLTDPSKLDSGKELK.[I]		0.0612001	0.00415845	1	3	1	P08238	P08238 [56-72]		2	1909.98	0.922	0.515702	0	104.1	95.9	6.55934e+06	5032627	7130		Light	High	Peak Found	High	-0.02	0.003498	0.04446	2.45	29.37
	TRUE	High	[R].YESLTDPSKLDSGKELK.[I]	3xLabel:13C(6)15N(2) [K9; K14; K17]	0.0028765	0.000477939	1	3	1	P08238	P08238 [56-72]		2	1934.02								7130	Redundant	Heavy	Peak Found	High	High	0.59	0.0004125	0.001838	2.59	29.37
	TRUE	High	[R].YHTSQSGDEMTSLSEYVSR.[M]		1.40498e-07	9.1126e-05	1	1	4	P08238	P08238 [457-475]		0	2176.95								7171	Redundant	Light	High	Peak Found	High	0.08	0.0001192	5.945e-08	4.52	43.25
	TRUE	High	[R].YHTSQSGDEMTSLSEYVSR.[M]	1xLabel:13C(6)15N(4) [R19]	1.14611e-07	9.1126e-05	1	1	4	P08238	P08238 [457-475]		0	2186.95	1.191	0.500078	0	91.3	108.7	1.75552e+07	1.73977e+07	7171		Heavy	Peak Found	High	High	0.77	0.0001192	4.797e-08	4.46	43.25
	TRUE	High	[R].YHTSQSGDEMTSLSEYVSR.[M]	1xOxidation [M10]	7.62665e-08	9.1126e-05	1	1	4	P08238	P08238 [457-475]		0	2192.94	1.175	0.547877	0	92	108	1.28061e+07	12521056	7170		Light	High	Peak Found	High	0.65	0.0001192	3.134e-08	4.74	31.21
	TRUE	High	[R].YHTSQSGDEMTSLSEYVSR.[M]	1xOxidation [M10]; 1xLabel:13C(6)15N(4) [R19]	1.2468e-08	9.1126e-05	1	1	3	P08238	P08238 [457-475]		0	2202.95								7170	Redundant	Heavy	Peak Found	High	High	-0.11	0.0001192	4.74e-09	4.36	31.21
TRUE	High	Master Protein	Q9Y490	Talin-1 OS=Homo sapiens OX=9606 GN=TLN1 PE=1 SV=3	0	294.364	17	25	77	25	2541	269.6	6.07	277.12	25	Pf00373, Pf01608, Pf08913, Pf09141, Pf16511	7094	ENSG00000137076	TLN1	A6NMY0; hsa:7094; Q86YD0; Q9NZQ2; Q9UHH8; Q9UPX3; Q9Y490	Integrin-mediated cell adhesion; Primary focal segmental glomerulosclerosis (FSGS); Focal adhesion	Smooth Muscle Contraction; Platelet degranulation ; Signaling by BRAF and RAF1 fusions; Signaling by moderate kinase activity BRAF mutants; Paradoxical activation of RAF signaling by kinase inactive BRAF; Signaling downstream of RAS mutants; XBP1(S) activates chaperone genes; SEMA3A-Plexin repulsion signaling by inhibiting Integrin adhesion; Signaling by RAF1 mutants; MAP2K and MAPK activation; S…	Rap1 signaling pathway; Focal adhesion; Platelet activation; Shigellosis; Human T-cell leukemia virus 1 infection	22	0	0.961	0.683862	21.23	91.3	108.7	4.11316e+07	4.07451e+07	High	High	1
	Checked	Confidence	Annotated Sequence	Modifications	Qvality PEP	Qvality q-value	# Protein Groups	# Proteins	# PSMs	Master Protein Accessions	Positions in Master Proteins	Modifications in Master Proteins	# Missed Cleavages	Theo. MH+ [Da]	Abundance Ratio: (Heavy) / (Light)	Abundance Ratio P-Value: (Heavy) / (Light)	Abundance Ratio Variability [%]: (Heavy) / (Light)	Abundances (Grouped): Light	Abundances (Grouped): Heavy	Abundance: F2: Light, Sample	Abundance: F2: Heavy, Sample	Precursor Quan Result ID	Quan Info	Quan Channel	Found in Sample: [S2] F2: Light, Sample	Found in Sample: [S4] F2: Heavy, Sample	Confidence (by Search Engine): Sequest HT	DeltaM [ppm] (by Search Engine): Sequest HT	Percolator q-Value (by Search Engine): Sequest HT	Percolator PEP (by Search Engine): Sequest HT	XCorr (by Search Engine): Sequest HT	Top Apex RT [min]
	TRUE	High	[K].AAAFEEQENETVVVK.[E]		3.75065e-07	9.1126e-05	1	1	2	Q9Y490	Q9Y490 [2477-2491]		0	1663.82	0.986	0.792232	0	100.7	99.3	1.799e+06	1.47611e+06	8		Light	High	Peak Found	High	0.26	0.0001192	1.642e-07	4.12	32.12
	TRUE	High	[R].AAMEPIVISAK.[T]	1xLabel:13C(6)15N(2) [K11]	0.0829463	0.00572516	1	1	1	Q9Y490	Q9Y490 [1594-1604]		0	1137.64	0.914	0.573705	0	104.5	95.5	2.36004e+06	1.79477e+06	50		Heavy	Peak Found	High	High	0.03	0.004753	0.06145	2.01	35.35
	TRUE	High	[K].ALGDLISATK.[A]		0.00737133	0.000812034	1	1	1	Q9Y490	Q9Y490 [2090-2099]		0	988.567	1.073	0.846037	0	96.5	103.5	2162173	1.93071e+06	347		Light	High	Peak Found	High	0.29	0.0007607	0.004878	1.97	38.31
	TRUE	High	[K].AVAEQIPLLVQGVR.[G]		1.09717e-07	9.1126e-05	1	1	3	Q9Y490	Q9Y490 [958-971]		0	1492.88	0.935	0.621883	0	103.3	96.7	4.16238e+06	3.24008e+06	674		Light	High	Peak Found	High	-0.25	0.0001192	4.587e-08	4.2	58.34
	TRUE	High	[K].AVAEQIPLLVQGVR.[G]	1xLabel:13C(6)15N(4) [R14]	0.000804852	9.1126e-05	1	1	1	Q9Y490	Q9Y490 [958-971]		0	1502.89								674	Redundant	Heavy	Peak Found	High	High	-0.45	0.0001192	0.0004879	2.99	58.34
	TRUE	High	[R].DLDQASLAAVSQQLAPR.[E]		1.44646e-07	9.1126e-05	1	1	2	Q9Y490	Q9Y490 [1674-1690]		0	1782.93	0.885	0.445011	0	106.1	93.9	2.04227e+06	1.50413e+06	952		Light	High	Peak Found	High	0.45	0.0001192	6.094e-08	3.79	60.74
	TRUE	High	[R].DLDQASLAAVSQQLAPR.[E]	3xDeamidated [Q4; Q12; Q13]	0.111338	0.00798519	1	1	1	Q9Y490	Q9Y490 [1674-1690]		0	1785.89	100	1e-17			200		994608	953		Light	High	Peak Found	High	-2.7	0.0066	0.08436	2.16	59.95
	TRUE	High	[R].DLDQASLAAVSQQLAPR.[E]	1xLabel:13C(6)15N(4) [R17]	1.2492e-05	9.1126e-05	1	1	2	Q9Y490	Q9Y490 [1674-1690]		0	1792.94								952	Redundant	Heavy	Peak Found	High	High	0.75	0.0001192	6.34e-06	3.34	60.74
	TRUE	High	[K].EAAYHPEVAPDVR.[L]		0.016138	0.00130832	1	1	1	Q9Y490	Q9Y490 [2221-2233]		0	1453.71	0.84	0.430554	0	108.7	91.3	3.05124e+06	2.13167e+06	1240		Light	High	Peak Found	High	0.87	0.001212	0.01094	1.63	21.4
	TRUE	High	[K].EADESLNFEEQILEAAK.[S]		0.00011315	9.1126e-05	1	1	1	Q9Y490	Q9Y490 [2334-2350]		0	1935.92								1242	Redundant	Light	High	Peak Found	High	2.87	0.0001192	6.304e-05	3.73	68.06
	TRUE	High	[K].EADESLNFEEQILEAAK.[S]	1xLabel:13C(6)15N(2) [K17]	0.000100723	9.1126e-05	1	1	1	Q9Y490	Q9Y490 [2334-2350]		0	1943.93	100	1e-17			200		332133	1242		Heavy	Not Found	High	High	-1.68	0.0001192	5.58e-05	3.43	68.06
	TRUE	High	[R].GSQAQPDSPSAQLALIAASQSFLQPGGK.[M]		0.00293939	0.000477939	1	1	1	Q9Y490	Q9Y490 [972-999]		0	2754.41	0.884	0.730682	0	106.2	93.8	292933	215451	2409		Light	High	Peak Found	High	-1.2	0.0004125	0.001872	3.99	75.08
	TRUE	High	[R].GSQAQPDSPSAQLALIAASQSFLQPGGK.[M]	1xLabel:13C(6)15N(2) [K28]	3.66535e-05	9.1126e-05	1	1	1	Q9Y490	Q9Y490 [972-999]		0	2762.42								2409	Redundant	Heavy	Peak Found	High	High	0.52	0.0001192	1.946e-05	4.19	75.08
	TRUE	High	[K].LAQAAQSSVATITR.[L]		7.06189e-07	9.1126e-05	1	1	1	Q9Y490	Q9Y490 [2044-2057]		0	1416.78	1.169	0.616218	0	92.2	107.8	4739394	4.60838e+06	2855		Light	High	Peak Found	High	0.25	0.0001192	3.191e-07	4.18	25.22
	TRUE	High	[K].LAQAAQSSVATITR.[L]	1xLabel:13C(6)15N(4) [R14]	4.8733e-07	9.1126e-05	1	1	1	Q9Y490	Q9Y490 [2044-2057]		0	1426.79								2855	Redundant	Heavy	Peak Found	High	High	0.44	0.0001192	2.161e-07	3.45	25.22
	TRUE	High	[R].LASEAKPAAVAAENEEIGSHIK.[H]		5.12784e-07	9.1126e-05	1	1	1	Q9Y490	Q9Y490 [1896-1917]		0	2235.16	1.526	0.114084	0	79.2	120.8	1.03722e+06	1317048	2873		Light	High	Peak Found	High	0.33	0.0001192	2.285e-07	3.5	30.2
	TRUE	High	[R].LASEAKPAAVAAENEEIGSHIK.[H]	2xLabel:13C(6)15N(2) [K6; K22]	1.61134e-05	9.1126e-05	1	1	1	Q9Y490	Q9Y490 [1896-1917]		0	2251.19								2873	Redundant	Heavy	Peak Found	High	High	-0.84	0.0001192	8.294e-06	3.12	30.2
	TRUE	High	[K].LGAASLGAEDPETQVVLINAVK.[D]		9.17565e-07	9.1126e-05	1	1	2	Q9Y490	Q9Y490 [2064-2085]		0	2195.19	0.781	0.35068	0	112.3	87.7	1.16041e+06	753934	3109		Light	High	Peak Found	High	0.21	0.0001192	4.176e-07	4.47	62.51
	TRUE	High	[K].LGAASLGAEDPETQVVLINAVK.[D]	1xLabel:13C(6)15N(2) [K22]	0.000219278	9.1126e-05	1	1	1	Q9Y490	Q9Y490 [2064-2085]		0	2203.21								3109	Redundant	Heavy	Peak Found	High	High	-0.1	0.0001192	0.0001257	4.07	62.51
	TRUE	High	[K].LHTDDELNWLDHGR.[T]	1xLabel:13C(6)15N(4) [R14]	0.0180739	0.00149171	1	1	1	Q9Y490	Q9Y490 [165-178]		0	1730.81	1.223	0.448343	0	90	110	1.0614e+06	1.08055e+06	3243		Heavy	Peak Found	High	High	-0.25	0.001344	0.01229	2.36	42.84
	TRUE	High	[R].LNEAAAGLNQAATELVQASR.[G]		2.87778e-08	9.1126e-05	1	1	2	Q9Y490	Q9Y490 [1242-1261]		0	2027.05								3538	Redundant	Light	High	Peak Found	High	-0.47	0.0001192	1.138e-08	4.21	60.36
	TRUE	High	[R].LNEAAAGLNQAATELVQASR.[G]	1xLabel:13C(6)15N(4) [R20]	2.47774e-07	9.1126e-05	1	1	2	Q9Y490	Q9Y490 [1242-1261]		0	2037.06	1.122	0.648082	0	94.2	105.8	2.3618e+06	2205105	3538		Heavy	Peak Found	High	High	-1.04	0.0001192	1.07e-07	4.58	60.36
	TRUE	High	[K].NLGTALAELR.[T]	1xLabel:13C(6)15N(4) [R10]	0.00309148	0.000477939	1	1	1	Q9Y490	Q9Y490 [1026-1035]		0	1067.61	1.072	0.92757	0	96.5	103.5	1.9484e+06	1737453	4724		Heavy	Peak Found	High	High	-0.51	0.0004125	0.001974	2.2	47.88
	TRUE	High	[K].QAAASATQTIAAAQHAASTPK.[A]		0.00243672	0.000224419	1	1	1	Q9Y490	Q9Y490 [923-943]		0	1995.03	0.961	0.666577	0	102	98	4847106	3877540	4904		Light	High	Peak Found	High	-0.71	0.0002185	0.001549	3.19	29.22
	TRUE	High	[K].QAAASATQTIAAAQHAASTPK.[A]	1xLabel:13C(6)15N(2) [K21]	6.55832e-05	9.1126e-05	1	1	1	Q9Y490	Q9Y490 [923-943]		0	2003.04								4904	Redundant	Heavy	Peak Found	High	High	-0.25	0.0001192	3.595e-05	3.19	29.22
	TRUE	High	[R].QEDVIATANLSR.[KR]	1xLabel:13C(6)15N(4) [R12]	0.00973989	0.00113965	1	2	1	Q9Y490	Q9Y490 [2198-2209]		0	1326.69	1.606	0.0595373	0	76.7	123.3	1.53803e+06	2.05598e+06	4939		Heavy	Peak Found	High	High	0.61	0.0009208	0.00648	2.28	30.02
	TRUE	High	[R].SGASGPENFQVGSMPPAQQQITSGQMHR.[G]		0.00565506	0.000694413	1	1	1	Q9Y490	Q9Y490 [455-482]		0	2927.35								5419	No Quan Values	Light	High	Not Found	High	-2.35	0.0005813	0.003701	3.6
	TRUE	High	[R].SGASGPENFQVGSMPPAQQQITSGQMHR.[G]	1xOxidation [M14]	0.000884461	9.1126e-05	1	1	1	Q9Y490	Q9Y490 [455-482]		0	2943.35								5421	No Quan Values	Light	High	Not Found	High	1.07	0.0001192	0.0005386	2.78
	TRUE	High	[R].SGASGPENFQVGSMPPAQQQITSGQMHR.[G]	1xDeamidated [Q18]; 1xOxidation [M26]; 1xLabel:13C(6)15N(4) [R28]	0.0273836	0.00166208	1	1	1	Q9Y490	Q9Y490 [455-482]		0	2954.34								5422	No Quan Values	Heavy	Not Found	High	High	4.72	0.001546	0.01906	3.65
	TRUE	High	[K].SNTSPEELGPLANQLTSDYGR.[L]		3.82883e-05	9.1126e-05	1	1	2	Q9Y490	Q9Y490 [1875-1895]		0	2249.07								5619	Redundant	Light	High	Peak Found	High	0.19	0.0001192	2.047e-05	3.71	58.03
	TRUE	High	[K].SNTSPEELGPLANQLTSDYGR.[L]	1xLabel:13C(6)15N(4) [R21]	1.73291e-05	9.1126e-05	1	1	1	Q9Y490	Q9Y490 [1875-1895]		0	2259.08	0.959	0.863306	0	102.1	97.9	1.37781e+06	1.09921e+06	5619		Heavy	Peak Found	High	High	1.17	0.0001192	8.964e-06	3.46	58.03
	TRUE	High	[K].TLAESALQLLYTAK.[E]		3.43311e-05	9.1126e-05	1	1	2	Q9Y490	Q9Y490 [1767-1780]		0	1521.85	0.742	0.310935	0	114.8	85.2	456975	282085	6065		Light	High	Peak Found	High	-1.1	0.0001192	1.83e-05	3.03	73.36
	TRUE	High	[K].TLAESALQLLYTAK.[E]	1xLabel:13C(6)15N(2) [K14]	0.000647367	9.1126e-05	1	1	1	Q9Y490	Q9Y490 [1767-1780]		0	1529.87								6065	Redundant	Heavy	Peak Found	High	High	-0.71	0.0001192	0.0003896	3.24	73.36
	TRUE	High	[K].TMLESAGGLIQTAR.[A]	1xLabel:13C(6)15N(4) [R14]	6.63472e-06	9.1126e-05	1	1	1	Q9Y490	Q9Y490 [1605-1618]		0	1457.77	100	1e-17			200		1.9002e+06	6144		Heavy	Not Found	High	High	-1.22	0.0001192	3.3e-06	3.33	46.92
	TRUE	High	[K].TMLESAGGLIQTAR.[A]	1xOxidation [M2]; 1xLabel:13C(6)15N(4) [R14]	1.89095e-05	9.1126e-05	1	1	1	Q9Y490	Q9Y490 [1605-1618]		0	1473.76	2.41	0.000213334	0	58.6	141.4	1.83709e+06	3.68425e+06	6145		Heavy	Peak Found	High	High	0.62	0.0001192	9.778e-06	2.93	37.1
	TRUE	High	[R].VAGSVTELIQAAEAMK.[G]		3.16915e-05	9.1126e-05	1	1	1	Q9Y490	Q9Y490 [2276-2291]		0	1617.85								6392	No Quan Values	Light	High	Not Found	High	1.02	0.0001192	1.678e-05	3.66
	TRUE	High	[K].VGAIPANALDDGQWSQGLISAAR.[M]		3.95868e-06	9.1126e-05	1	1	2	Q9Y490	Q9Y490 [2376-2398]		0	2310.18								6560	Redundant	Light	High	Peak Found	High	-0.05	0.0001192	1.924e-06	4.66	66.47
	TRUE	High	[K].VGAIPANALDDGQWSQGLISAAR.[M]	1xLabel:13C(6)15N(4) [R23]	5.06931e-06	9.1126e-05	1	1	2	Q9Y490	Q9Y490 [2376-2398]		0	2320.19	0.912	0.73978	0	104.6	95.4	1.11252e+06	844323	6560		Heavy	Peak Found	High	High	-0.17	0.0001192	2.487e-06	4.22	66.47
	TRUE	High	[K].VLGEAMTGISQNAK.[N]		2.15794e-07	9.1126e-05	1	1	1	Q9Y490	Q9Y490 [1402-1415]		0	1418.73								6688	No Quan Values	Light	High	Not Found	High	-0.76	0.0001192	9.273e-08	3.72
	TRUE	High	[K].VLGEAMTGISQNAK.[N]	1xOxidation [M6]	0.00160229	0.000224419	1	1	1	Q9Y490	Q9Y490 [1402-1415]		0	1434.73	0.01	1e-17		200		386040		6689		Light	High	Not Found	High	1.03	0.0002185	0.001001	2.62	20.26
	TRUE	High	[K].VLGEAMTGISQNAK.[N]	1xOxidation [M6]; 1xLabel:13C(6)15N(2) [K14]	0.000154683	9.1126e-05	1	1	1	Q9Y490	Q9Y490 [1402-1415]		0	1442.74								6689	Redundant	Heavy	Peak Found	High	High	-0.02	0.0001192	8.785e-05	2.96	20.26
	TRUE	High	[K].VMVTNVTSLLK.[T]	1xLabel:13C(6)15N(2) [K11]	0.000971919	9.1126e-05	1	2	1	Q9Y490	Q9Y490 [2120-2130]		0	1212.71	1.505	0.15778	0	79.9	120.1	1.28451e+06	1.60825e+06	6818		Heavy	Peak Found	High	High	0.68	0.0001192	0.0005936	2.28	53.35
	TRUE	High	[K].VSQMAQYFEPLTLAAVGAASK.[T]		3.85678e-05	9.1126e-05	1	1	1	Q9Y490	Q9Y490 [1731-1751]		0	2182.12								6918	Redundant	Light	High	Peak Found	High	-0.14	0.0001192	2.062e-05	5.31	76.27
	TRUE	High	[K].VSQMAQYFEPLTLAAVGAASK.[T]	1xLabel:13C(6)15N(2) [K21]	0.0968447	0.00672434	1	1	1	Q9Y490	Q9Y490 [1731-1751]		0	2190.14	0.757	0.384299	0	113.8	86.2	112887	71136.6	6918		Heavy	Peak Found	High	High	-3.17	0.005508	0.07248	2.04	76.27
	TRUE	High	[K].VSQMAQYFEPLTLAAVGAASK.[T]	1xOxidation [M4]; 1xLabel:13C(6)15N(2) [K21]	0.000743101	9.1126e-05	1	1	1	Q9Y490	Q9Y490 [1731-1751]		0	2206.13								6917	No Quan Values	Heavy	Not Found	High	High	-0.21	0.0001192	0.0004486	3.17
TRUE	High	Master Protein	P22314	Ubiquitin-like modifier-activating enzyme 1 OS=Homo sapiens OX=9606 GN=UBA1 PE=1 SV=3	0	282	23	19	81	19	1058	117.8	5.76	296.94	19	Pf00899, Pf09358, Pf10585, Pf16190, Pf16191	7317	ENSG00000130985	UBA1	hsa:7317; P22314; Q5JRR8; Q96E13	Proteasome degradation; Parkin-ubiquitin proteasomal system pathway; Parkinson's disease pathway	Synthesis of active ubiquitin: roles of E1 and E2 enzymes; Antigen processing: Ubiquitination & Proteasome degradation	Ubiquitin mediated proteolysis; Parkinson disease; Pathways of neurodegeneration	8	0	0.971	0.727731	13.44	103	97	1.70074e+08	1.33256e+08	High	High	1
	Checked	Confidence	Annotated Sequence	Modifications	Qvality PEP	Qvality q-value	# Protein Groups	# Proteins	# PSMs	Master Protein Accessions	Positions in Master Proteins	Modifications in Master Proteins	# Missed Cleavages	Theo. MH+ [Da]	Abundance Ratio: (Heavy) / (Light)	Abundance Ratio P-Value: (Heavy) / (Light)	Abundance Ratio Variability [%]: (Heavy) / (Light)	Abundances (Grouped): Light	Abundances (Grouped): Heavy	Abundance: F2: Light, Sample	Abundance: F2: Heavy, Sample	Precursor Quan Result ID	Quan Info	Quan Channel	Found in Sample: [S2] F2: Light, Sample	Found in Sample: [S4] F2: Heavy, Sample	Confidence (by Search Engine): Sequest HT	DeltaM [ppm] (by Search Engine): Sequest HT	Percolator q-Value (by Search Engine): Sequest HT	Percolator PEP (by Search Engine): Sequest HT	XCorr (by Search Engine): Sequest HT	Top Apex RT [min]
	TRUE	High	[R].AAVATFLQSVQVPEFTPK.[S]		5.43507e-07	9.1126e-05	1	1	3	P22314	P22314 [785-802]		0	1933.04	0.926	0.696854	0	103.8	96.2	2.99222e+06	2.30549e+06	69		Light	High	Peak Found	High	-0.45	0.0001192	2.421e-07	4.7	71.56
	TRUE	High	[R].AAVATFLQSVQVPEFTPK.[S]	1xLabel:13C(6)15N(2) [K18]	3.30051e-06	9.1126e-05	1	1	2	P22314	P22314 [785-802]		0	1941.06								69	Redundant	Heavy	Peak Found	High	High	-0.21	0.0001192	1.588e-06	4.08	71.56
	TRUE	High	[R].AENYDIPSADR.[H]		0.000615288	9.1126e-05	1	1	1	P22314	P22314 [870-880]		0	1250.56	0.908	0.546235	0	104.8	95.2	3788620	2.86247e+06	161		Light	High	Peak Found	High	-0.36	0.0001192	0.0003689	2.76	23.15
	TRUE	High	[R].ALPAVQQNNLDEDLIR.[K]		1.01281e-07	9.1126e-05	1	1	2	P22314	P22314 [369-384]		0	1808.95	0.831	0.241175	0	109.2	90.8	6388420	4417019	391		Light	High	Peak Found	High	-0.16	0.0001192	4.227e-08	4.82	51.13
	TRUE	High	[R].ALPAVQQNNLDEDLIR.[K]	1xLabel:13C(6)15N(4) [R16]	7.90011e-06	9.1126e-05	1	1	1	P22314	P22314 [369-384]		0	1818.96								391	Redundant	Heavy	Peak Found	High	High	-0.39	0.0001192	3.942e-06	4.31	51.13
	TRUE	High	[K].ATLPSPDKLPGFK.[M]		0.0153566	0.00130832	1	1	1	P22314	P22314 [831-843]		1	1370.77	0.766	0.0837886	0	113.3	86.7	16838064	10728541	656		Light	High	Peak Found	High	-0.06	0.001212	0.01039	1.39	42.14
	TRUE	High	[R].DEFEGLFKQPAENVNQYLTDPK.[F]		2.08964e-08	9.1126e-05	1	1	1	P22314	P22314 [650-671]		1	2582.24	0.818	0.503308	0	110	90	683772	465608	824		Light	High	Peak Found	High	-1.97	0.0001192	8.149e-09	5.04	65.61
	TRUE	High	[R].DEFEGLFKQPAENVNQYLTDPK.[F]	2xLabel:13C(6)15N(2) [K8; K22]	0.000409671	9.1126e-05	1	1	1	P22314	P22314 [650-671]		1	2598.27								824	Redundant	Heavy	Peak Found	High	High	-0.01	0.0001192	0.0002415	3.53	65.61
	TRUE	High	[K].ERLDQPMTEIVSR.[V]	1xOxidation [M7]; 2xLabel:13C(6)15N(4) [R2; R13]	0.000168785	9.1126e-05	1	1	1	P22314	P22314 [1009-1021]		1	1609.81	0.922	0.674904	0	104	96	3068904	2355074	1706		Heavy	Peak Found	High	High	0.36	0.0001192	9.584e-05	2.62	22.16
	TRUE	High	[K].GNVQVVIPFLTESYSSSQDPPEK.[S]		6.7519e-05	9.1126e-05	1	1	1	P22314	P22314 [605-627]		0	2521.25	0.705	0.217932	0	117.3	82.7	569669	334191	2341		Light	High	Peak Found	High	-0.25	0.0001192	3.682e-05	4.03	70.14
	TRUE	High	[K].GNVQVVIPFLTESYSSSQDPPEK.[S]	1xLabel:13C(6)15N(2) [K23]	8.27671e-05	9.1126e-05	1	1	1	P22314	P22314 [605-627]		0	2529.26								2341	Redundant	Heavy	Peak Found	High	High	-0.12	0.0001192	4.573e-05	3.03	70.14
	TRUE	High	[R].LAGTQPLEVLEAVQR.[S]		5.93747e-09	9.1126e-05	1	1	4	P22314	P22314 [679-693]		0	1623.91								2824	Redundant	Light	High	Peak Found	High	0.09	0.0001192	2.186e-09	5.3	61.32
	TRUE	High	[R].LAGTQPLEVLEAVQR.[S]	1xLabel:13C(6)15N(4) [R15]	1.70985e-07	9.1126e-05	1	1	2	P22314	P22314 [679-693]		0	1633.91	0.776	0.0974549	0	112.6	87.4	2.62801e+07	1.69671e+07	2824		Heavy	Peak Found	High	High	0.05	0.0001192	7.251e-08	3.51	61.32
	TRUE	High	[R].LAGTQPLEVLEAVQR.[S]	1xDeamidated [Q14]; 1xLabel:13C(6)15N(4) [R15]	0.000182837	9.1126e-05	1	1	1	P22314	P22314 [679-693]		0	1634.9	1.064	0.987054	0	96.9	103.1	7484783	6628026	2825		Heavy	Peak Found	High	High	1.69	0.0001192	0.0001039	2.65	61.85
	TRUE	High	[R].LDQPMTEIVSR.[V]		0.00102997	9.1126e-05	1	1	1	P22314	P22314 [1011-1021]		0	1288.66								2960	Redundant	Light	High	Peak Found	High	0.38	0.0001192	0.0006323	3.07	36.65
	TRUE	High	[R].LDQPMTEIVSR.[V]	1xLabel:13C(6)15N(4) [R11]	1.96098e-05	9.1126e-05	1	1	2	P22314	P22314 [1011-1021]		0	1298.66	0.969	0.65244	0	101.6	98.4	13442921	10834418	2960		Heavy	Peak Found	High	High	0.31	0.0001192	1.019e-05	3.64	36.65
	TRUE	High	[R].LDQPMTEIVSR.[V]	1xOxidation [M5]; 1xLabel:13C(6)15N(4) [R11]	0.000392196	9.1126e-05	1	1	2	P22314	P22314 [1011-1021]		0	1314.66	1.065	0.964069	0	96.9	103.1	5.10304e+06	4.52076e+06	2959		Heavy	Peak Found	High	High	0.24	0.0001192	0.0002316	2.96	23.61
	TRUE	High	[K].IHVSDQELQSANASVDDSR.[L]		4.97115e-10	9.1126e-05	1	1	2	P22314	P22314 [807-825]		0	2070.97	1.092	0.841081	0	95.6	104.4	2.28936e+07	2.07958e+07	3244		Light	High	Peak Found	High	-0.26	0.0001192	1.648e-10	5.41	29
	TRUE	High	[K].IHVSDQELQSANASVDDSR.[L]	1xLabel:13C(6)15N(4) [R19]	8.5513e-11	9.1126e-05	1	1	4	P22314	P22314 [807-825]		0	2080.98								3244	Redundant	Heavy	Peak Found	High	High	1.77	0.0001192	2.647e-11	5.9	29
	TRUE	High	[R].LQTSSVLVSGLR.[G]		0.000144885	9.1126e-05	1	1	2	P22314	P22314 [70-81]		0	1259.73	1.249	0.350797	0	88.9	111.1	12481199	12971397	3701		Light	High	Peak Found	High	0.05	0.0001192	8.167e-05	2.3	41.54
	TRUE	High	[R].LQTSSVLVSGLR.[G]	1xLabel:13C(6)15N(4) [R12]	4.92395e-06	9.1126e-05	1	1	2	P22314	P22314 [70-81]		0	1269.74								3701	Redundant	Heavy	Peak Found	High	High	0.46	0.0001192	2.409e-06	3.07	41.54
	TRUE	High	[R].NEEDAAELVALAQAVNAR.[A]		2.18532e-10	9.1126e-05	1	1	7	P22314	P22314 [351-368]		0	1883.95	1.053	0.986464	0	97.4	102.6	9.94212e+06	8.7126e+06	4628		Light	High	Peak Found	High	0.27	0.0001192	7.003e-11	5.06	68.79
	TRUE	High	[R].NEEDAAELVALAQAVNAR.[A]	1xLabel:13C(6)15N(4) [R18]	1.09504e-10	9.1126e-05	1	1	4	P22314	P22314 [351-368]		0	1893.95								4628	Redundant	Heavy	Peak Found	High	High	0.41	0.0001192	3.411e-11	5.28	68.79
	TRUE	High	[K].NGSEADIDEGLYSR.[Q]		3.48754e-07	9.1126e-05	1	1	2	P22314	P22314 [44-57]		0	1525.68	1.071	0.921767	0	96.6	103.4	10528259	9385428	4689		Light	High	Peak Found	High	-0.28	0.0001192	1.533e-07	3.69	31.47
	TRUE	High	[K].NGSEADIDEGLYSR.[Q]	1xDeamidated [N1]	9.09733e-05	9.1126e-05	1	1	1	P22314	P22314 [44-57]		0	1526.66								4690	Redundant	Light	High	Peak Found	High	0.17	0.0001192	5.048e-05	3.32	36
	TRUE	High	[K].NGSEADIDEGLYSR.[Q]	1xLabel:13C(6)15N(4) [R14]	1.00125e-06	9.1126e-05	1	1	2	P22314	P22314 [44-57]		0	1535.68								4689	Redundant	Heavy	Peak Found	High	High	-0.25	0.0001192	4.595e-07	4.06	31.47
	TRUE	High	[K].NGSEADIDEGLYSR.[Q]	1xDeamidated [N1]; 1xLabel:13C(6)15N(4) [R14]	1.79709e-05	9.1126e-05	1	1	1	P22314	P22314 [44-57]		0	1536.67	0.839	0.492052	0	108.7	91.3	1.42776e+06	997323	4690		Heavy	Peak Found	High	High	-0.12	0.0001192	9.329e-06	3.38	36
	TRUE	High	[R].QFLFRPWDVTK.[L]		0.0727534	0.00489315	1	1	2	P22314	P22314 [516-526]		0	1436.77	1.03	0.861232	0	98.5	101.5	8.19012e+06	7.01811e+06	4970		Light	High	Peak Found	High	-0.44	0.00405	0.05355	1.37	58.9
	TRUE	High	[R].QFLFRPWDVTK.[L]	1xLabel:13C(6)15N(2) [K11]; 1xLabel:13C(6)15N(4) [R5]	0.0564566	0.0037862	1	1	1	P22314	P22314 [516-526]		0	1454.79								4970	Redundant	Heavy	Peak Found	High	High	-0.07	0.003144	0.04072	1.53	58.9
	TRUE	High	[R].QNRYDGQVAVFGSDLQEK.[L]		2.58525e-05	9.1126e-05	1	1	1	P22314	P22314 [448-465]		1	2053.99	1.237	0.426542	0	89.4	110.6	5238845	5391569	5081		Light	High	Peak Found	High	-0.29	0.0001192	1.356e-05	4.32	40.06
	TRUE	High	[R].QNRYDGQVAVFGSDLQEK.[L]	1xLabel:13C(6)15N(2) [K18]; 1xLabel:13C(6)15N(4) [R3]	0.0237974	0.00166208	1	1	2	P22314	P22314 [448-465]		1	2072.02								5081	Redundant	Heavy	Peak Found	High	High	-0.81	0.001546	0.01641	3.34	40.06
	TRUE	High	[K].QPAENVNQYLTDPK.[F]		0.00199054	0.000224419	1	1	1	P22314	P22314 [658-671]		0	1616.79	0.01	1e-17		200		5919467		5085		Light	High	Not Found	High	-0.13	0.0002185	0.00125	3.22	34.41
	TRUE	High	[K].SLVASLAEPDFVVTDFAK.[F]		5.09068e-07	9.1126e-05	1	1	2	P22314	P22314 [305-322]		0	1909								5573	Redundant	Light	High	Peak Found	High	-0.32	0.0001192	2.259e-07	4.25	74.72
	TRUE	High	[K].SLVASLAEPDFVVTDFAK.[F]	1xLabel:13C(6)15N(2) [K18]	3.48341e-05	9.1126e-05	1	1	2	P22314	P22314 [305-322]		0	1917.01	1.023	0.92997	0	98.9	101.1	1.10818e+06	943019	5573		Heavy	Peak Found	High	High	0.17	0.0001192	1.848e-05	4.37	74.72
	TRUE	High	[R].YDGQVAVFGSDLQEK.[L]		0.000155812	9.1126e-05	1	1	1	P22314	P22314 [451-465]		0	1655.79	0.974	0.699725	0	101.3	98.7	5.70376e+06	4.62175e+06	7095		Light	High	Peak Found	High	-0.02	0.0001192	8.849e-05	3.17	45.5
	TRUE	High	[R].YDGQVAVFGSDLQEK.[L]	1xLabel:13C(6)15N(2) [K15]	1.32001e-06	9.1126e-05	1	1	3	P22314	P22314 [451-465]		0	1663.81								7095	Redundant	Heavy	Peak Found	High	High	-0.04	0.0001192	6.124e-07	3.78	45.5
TRUE	High	Master Protein	Q07065	Cytoskeleton-associated protein 4 OS=Homo sapiens OX=9606 GN=CKAP4 PE=1 SV=2	0	275.758	46	22	85	22	602	66	5.92	266.89	22		10970	ENSG00000136026	CKAP4	hsa:10970; Q07065; Q504S5; Q53ES6		RND2 GTPase cycle; Neutrophil degranulation; Regulation of Insulin-like Growth Factor (IGF) transport and uptake by Insulin-like Growth Factor Binding Proteins (IGFBPs); Post-translational protein phosphorylation; RND3 GTPase cycle; Surfactant metabolism	Protein processing in endoplasmic reticulum	7	0	1.162	0.487254	7.2	93	107	2.30537e+08	2.20851e+08	High	High	1
	Checked	Confidence	Annotated Sequence	Modifications	Qvality PEP	Qvality q-value	# Protein Groups	# Proteins	# PSMs	Master Protein Accessions	Positions in Master Proteins	Modifications in Master Proteins	# Missed Cleavages	Theo. MH+ [Da]	Abundance Ratio: (Heavy) / (Light)	Abundance Ratio P-Value: (Heavy) / (Light)	Abundance Ratio Variability [%]: (Heavy) / (Light)	Abundances (Grouped): Light	Abundances (Grouped): Heavy	Abundance: F2: Light, Sample	Abundance: F2: Heavy, Sample	Precursor Quan Result ID	Quan Info	Quan Channel	Found in Sample: [S2] F2: Light, Sample	Found in Sample: [S4] F2: Heavy, Sample	Confidence (by Search Engine): Sequest HT	DeltaM [ppm] (by Search Engine): Sequest HT	Percolator q-Value (by Search Engine): Sequest HT	Percolator PEP (by Search Engine): Sequest HT	XCorr (by Search Engine): Sequest HT	Top Apex RT [min]
	TRUE	High	[K].ASVSQVEADLK.[M]	1xLabel:13C(6)15N(2) [K11]	0.00260024	0.000224419	1	1	1	Q07065	Q07065 [541-551]		0	1154.61	1.179	0.604235	0	91.8	108.2	7.5486e+06	7406145	627		Heavy	Peak Found	High	High	0.36	0.0002185	0.00165	2.3	30.12
	TRUE	High	[R].DFTSLENTVEER.[L]		0.00063342	9.1126e-05	1	1	2	Q07065	Q07065 [229-240]		0	1439.66								873	Redundant	Light	High	Peak Found	High	0.02	0.0001192	0.0003812	2.69	47.96
	TRUE	High	[R].DFTSLENTVEER.[L]	1xLabel:13C(6)15N(4) [R12]	4.46062e-05	9.1126e-05	1	1	1	Q07065	Q07065 [229-240]		0	1449.67	1.159	0.597029	0	92.6	107.4	12486177	12047173	873		Heavy	Peak Found	High	High	0.21	0.0001192	2.394e-05	3.54	47.96
	TRUE	High	[K].DLSDGIHVVK.[D]		0.0281612	0.00166208	1	1	2	Q07065	Q07065 [214-223]		0	1082.58	1.222	0.489734	0	90	110	7.22307e+06	7.34771e+06	1013		Light	High	Peak Found	High	-0.14	0.001546	0.01958	1.73	26.65
	TRUE	High	[K].DLSDGIHVVK.[D]	1xLabel:13C(6)15N(2) [K10]	0.0015342	9.1126e-05	1	1	2	Q07065	Q07065 [214-223]		0	1090.6								1013	Redundant	Heavy	Peak Found	High	High	-0.38	0.0001192	0.000954	2.09	26.65
	TRUE	High	[R].EELGQGLQGVEQK.[V]		8.55813e-06	9.1126e-05	1	1	2	Q07065	Q07065 [149-161]		0	1414.72	1.116	0.749632	0	94.5	105.5	15310799	14214381	1394		Light	High	Peak Found	High	-0.15	0.0001192	4.281e-06	3.89	28.72
	TRUE	High	[R].EELGQGLQGVEQK.[V]	1xLabel:13C(6)15N(2) [K13]	6.30538e-06	9.1126e-05	1	1	2	Q07065	Q07065 [149-161]		0	1422.73								1394	Redundant	Heavy	Peak Found	High	High	0.34	0.0001192	3.121e-06	4.04	28.72
	TRUE	High	[R].ELVSLKQEQQAFK.[E]		0.00154535	9.1126e-05	1	1	1	Q07065	Q07065 [327-339]		1	1547.84	0.746	0.23405	0	114.5	85.5	1.60334e+06	995761	1615		Light	High	Peak Found	High	-0.75	0.0001192	0.0009629	2.97	34.49
	TRUE	High	[R].ELVSLKQEQQAFK.[E]	2xLabel:13C(6)15N(2) [K6; K13]	0.0902379	0.00598494	1	1	1	Q07065	Q07065 [327-339]		1	1563.87								1615	Redundant	Heavy	Peak Found	High	High	-0.48	0.004948	0.06726	2.55	34.49
	TRUE	High	[R].ERDFTSLENTVEER.[L]		0.00161393	0.000224419	1	1	2	Q07065	Q07065 [227-240]		1	1724.81	1.164	0.583066	0	92.4	107.6	1.17304e+07	11360164	1704		Light	High	Peak Found	High	-0.39	0.0002185	0.001009	3.6	38.09
	TRUE	High	[R].ERDFTSLENTVEER.[L]	2xLabel:13C(6)15N(4) [R2; R14]	1.73291e-05	9.1126e-05	1	1	4	Q07065	Q07065 [227-240]		1	1744.83								1704	Redundant	Heavy	Peak Found	High	High	0.26	0.0001192	8.915e-06	4.23	38.09
	TRUE	High	[K].GAHPSGGADDVAKKPPPAPQQPPPPPAPHPQQHPQQHPQNQAHGK.[G]		0.00462544	0.000596234	1	1	1	Q07065	Q07065 [22-66]		1	4656.31	0.01	1e-17		200		602053		2034		Light	High	Not Found	High	1.95	0.0005035	0.002998	3.11	16.61
	TRUE	High	[K].GAHPSGGADDVAKKPPPAPQQPPPPPAPHPQQHPQQHPQNQAHGK.[G]	1xDeamidated [Q20]	0.0429972	0.00273013	1	1	1	Q07065	Q07065 [22-66]		1	4657.29								2035	No Quan Values	Light	High	Not Found	High	4.21	0.002423	0.03065	3.26
	TRUE	High	[K].KPPPAPQQPPPPPAPHPQQHPQQHPQNQAHGK.[G]		8.37342e-06	9.1126e-05	1	1	2	Q07065	Q07065 [35-66]		0	3493.77	0.172	9.76086e-11	0	170.7	29.3	1.10038e+06	157458	2742		Light	High	Peak Found	High	-0.33	0.0001192	4.195e-06	2.12	13.35
	TRUE	High	[K].KPPPAPQQPPPPPAPHPQQHPQQHPQNQAHGK.[G]	1xDeamidated [Q]	0.00134673	9.1126e-05	1	1	3	Q07065	Q07065 [35-66]		0	3494.76	0.672	0.155074	0	119.6	80.4	677457	378702	2743		Light	High	Peak Found	High	4.88	0.0001192	0.0008352	2.68	13.34
	TRUE	High	[K].KPPPAPQQPPPPPAPHPQQHPQQHPQNQAHGK.[G]	1xDeamidated [N27]; 2xLabel:13C(6)15N(2) [K1; K32]	0.0444977	0.00273013	1	1	1	Q07065	Q07065 [35-66]		0	3510.79								2743	Redundant	Heavy	Peak Found	High	High	3.97	0.002423	0.03179	2.35	13.6
	TRUE	High	[R].LALQALTEK.[L]		0.0152481	0.00130832	1	1	2	Q07065	Q07065 [347-355]		0	986.588	1.148	0.635097	0	93.1	106.9	15504501	14811343	2831		Light	High	Peak Found	High	0.34	0.001212	0.0103	2.25	35.15
	TRUE	High	[R].LALQALTEK.[L]	1xLabel:13C(6)15N(2) [K9]	0.00681324	0.000694413	1	1	1	Q07065	Q07065 [347-355]		0	994.602								2831	Redundant	Heavy	Peak Found	High	High	0.06	0.0006708	0.004479	2.27	35.15
	TRUE	High	[R].LEGLGSSEADQDGLASTVR.[S]		1.97375e-10	9.1126e-05	1	1	2	Q07065	Q07065 [455-473]		0	1904.92	1.175	0.547986	0	92	108	2.74218e+07	2.68107e+07	3024		Light	High	Peak Found	High	0	0.0001192	6.32e-11	5.81	41.14
	TRUE	High	[R].LEGLGSSEADQDGLASTVR.[S]	1xLabel:13C(6)15N(4) [R19]	3.79394e-08	9.1126e-05	1	1	3	Q07065	Q07065 [455-473]		0	1914.93								3024	Redundant	Heavy	Peak Found	High	High	-0.43	0.0001192	1.511e-08	5.5	41.14
	TRUE	High	[R].LQHVEDGVLSMQVASAR.[Q]		4.02125e-08	9.1126e-05	1	1	2	Q07065	Q07065 [413-429]		0	1839.94								3658	Redundant	Light	High	Peak Found	High	-0.44	0.0001192	1.607e-08	3.12	40.32
	TRUE	High	[R].LQHVEDGVLSMQVASAR.[Q]	1xLabel:13C(6)15N(4) [R17]	3.2904e-07	9.1126e-05	1	1	2	Q07065	Q07065 [413-429]		0	1849.95	1.306	0.233285	0	86.7	113.3	8.82468e+06	9.59178e+06	3658		Heavy	Peak Found	High	High	-1.61	0.0001192	1.434e-07	4	40.32
	TRUE	High	[R].LQHVEDGVLSMQVASAR.[Q]	1xOxidation [M11]	1.30242e-08	9.1126e-05	1	1	2	Q07065	Q07065 [413-429]		0	1855.93								3657	Redundant	Light	High	Peak Found	High	0.77	0.0001192	4.956e-09	4.35	30.78
	TRUE	High	[R].LQHVEDGVLSMQVASAR.[Q]	1xOxidation [M11]; 1xLabel:13C(6)15N(4) [R17]	3.0374e-07	9.1126e-05	1	1	2	Q07065	Q07065 [413-429]		0	1865.94	1.15	0.681035	0	93	107	5.62467e+06	5381909	3657		Heavy	Peak Found	High	High	-0.27	0.0001192	1.328e-07	4.01	30.78
	TRUE	High	[K].LQNEILKDLSDGIHVVK.[D]		0.0787247	0.00515555	1	1	1	Q07065	Q07065 [207-223]		1	1921.08	1.54	0.109076	0	78.7	121.3	258698	331586	3671		Light	High	Peak Found	High	-0.11	0.004323	0.05821	2.28	60.06
	TRUE	High	[R].QREELGQGLQGVEQK.[V]		0.00010911	9.1126e-05	1	1	3	Q07065	Q07065 [147-161]		1	1698.88	1.387	0.156457	0	83.8	116.2	7267102	8.38451e+06	5113		Light	High	Peak Found	High	-0.58	0.0001192	6.069e-05	4.03	22.56
	TRUE	High	[R].QREELGQGLQGVEQK.[V]	1xLabel:13C(6)15N(2) [K15]; 1xLabel:13C(6)15N(4) [R2]	3.19229e-05	9.1126e-05	1	1	3	Q07065	Q07065 [147-161]		1	1716.9								5113	Redundant	Heavy	Peak Found	High	High	0.53	0.0001192	1.686e-05	3.45	22.56
	TRUE	High	[R].QTESLESLLSK.[S]		0.00436705	0.000596234	1	1	2	Q07065	Q07065 [430-440]		0	1234.65								5137	Redundant	Light	High	Peak Found	High	0.03	0.0005035	0.002817	2.31	47.96
	TRUE	High	[R].QTESLESLLSK.[S]	1xLabel:13C(6)15N(2) [K11]	0.00493429	0.000694413	1	1	1	Q07065	Q07065 [430-440]		0	1242.67	1.214	0.437272	0	90.4	109.6	16878778	17045170	5137		Heavy	Peak Found	High	High	0.29	0.0005813	0.003203	1.79	47.96
	TRUE	High	[R].SEESVSRLPEEIR.[R]		0.00763975	0.000914196	1	1	2	Q07065	Q07065 [359-371]		1	1530.78	1.123	0.731849	0	94.2	105.8	3829472	3.58008e+06	5355		Light	High	Peak Found	High	-0.07	0.0008339	0.005048	2.33	28.44
	TRUE	High	[R].SEESVSRLPEEIRR.[L]		0.000597675	9.1126e-05	1	1	1	Q07065	Q07065 [359-372]		2	1686.88	1.126	0.723899	0	94.1	105.9	8627291	8.08471e+06	5356		Light	High	Peak Found	High	-0.27	0.0001192	0.0003593	3.85	23.67
	TRUE	High	[K].SINDNIAIFTEVQKR.[S]		0.00913399	0.000914196	1	1	1	Q07065	Q07065 [247-261]		1	1747.93								5549	No Quan Values	Light	High	Not Found	High	-0.37	0.0008339	0.006073	2.3
	TRUE	High	[K].SINDNIAIFTEVQKR.[S]	1xLabel:13C(6)15N(2) [K14]; 1xLabel:13C(6)15N(4) [R15]	0.00235033	0.000224419	1	1	1	Q07065	Q07065 [247-261]		1	1765.96								5549	Redundant	Heavy	Not Found	High	High	-0.09	0.0002185	0.001485	2.68
	TRUE	High	[R].STLQTMESDIYTEVR.[E]		3.61242e-05	9.1126e-05	1	1	1	Q07065	Q07065 [312-326]		0	1772.84								5791	Redundant	Light	High	Peak Found	High	0.19	0.0001192	1.923e-05	4.01	59.22
	TRUE	High	[R].STLQTMESDIYTEVR.[E]	1xLabel:13C(6)15N(4) [R15]	1.85797e-06	9.1126e-05	1	1	1	Q07065	Q07065 [312-326]		0	1782.85	1.317	0.272572	0	86.3	113.7	2.63847e+06	2.89189e+06	5791		Heavy	Peak Found	High	High	-0.34	0.0001192	8.728e-07	4.35	59.22
	TRUE	High	[R].STLQTMESDIYTEVR.[E]	1xOxidation [M6]	0.000555813	9.1126e-05	1	1	1	Q07065	Q07065 [312-326]		0	1788.83								5792	Redundant	Light	High	Peak Found	High	-1.33	0.0001192	0.0003323	3.69	40.4
	TRUE	High	[R].STLQTMESDIYTEVR.[E]	1xOxidation [M6]; 1xLabel:13C(6)15N(4) [R15]	0.000619772	9.1126e-05	1	1	1	Q07065	Q07065 [312-326]		0	1798.84	1.086	0.775455	0	95.9	104.1	2.79362e+06	2.52386e+06	5792		Heavy	Peak Found	High	High	-0.01	0.0001192	0.0003717	2.94	40.4
	TRUE	High	[R].SVGELPSTVESLQK.[V]		3.72347e-07	9.1126e-05	1	1	2	Q07065	Q07065 [492-505]		0	1473.78								5819	Redundant	Light	High	Peak Found	High	0.39	0.0001192	1.632e-07	3.65	40.59
	TRUE	High	[R].SVGELPSTVESLQK.[V]	1xLabel:13C(6)15N(2) [K14]	8.62061e-06	9.1126e-05	1	1	1	Q07065	Q07065 [492-505]		0	1481.79	1.01	0.825938	0	99.5	100.5	26860722	22585206	5819		Heavy	Peak Found	High	High	0.45	0.0001192	4.338e-06	3.22	40.59
	TRUE	High	[R].TAVDSLVAYSVK.[I]		3.98758e-06	9.1126e-05	1	1	3	Q07065	Q07065 [555-566]		0	1252.68	1.23	0.39662	0	89.7	110.3	12307249	12591501	5928		Light	High	Peak Found	High	0.52	0.0001192	1.931e-06	3.16	44.47
	TRUE	High	[R].TAVDSLVAYSVK.[I]	1xLabel:13C(6)15N(2) [K12]	7.84285e-06	9.1126e-05	1	1	2	Q07065	Q07065 [555-566]		0	1260.69								5928	Redundant	Heavy	Peak Found	High	High	0.59	0.0001192	3.922e-06	3.1	44.47
	TRUE	High	[K].VQEQVHTLLSQDQAQAAR.[L]		2.43723e-10	9.1126e-05	1	1	4	Q07065	Q07065 [506-523]		0	2022.04								6876	Redundant	Light	High	Peak Found	High	0.25	0.0001192	7.865e-11	5.95	28.46
	TRUE	High	[K].VQEQVHTLLSQDQAQAAR.[L]	1xLabel:13C(6)15N(4) [R18]	1.09045e-09	9.1126e-05	1	1	4	Q07065	Q07065 [506-523]		0	2032.04	1.179	0.53441	0	91.8	108.2	3.29422e+07	3.23296e+07	6876		Heavy	Peak Found	High	High	-0.42	0.0001192	3.736e-10	6.26	28.46
	TRUE	High	[K].VQSLQATFGTFESILR.[S]		0.00113176	9.1126e-05	1	1	1	Q07065	Q07065 [162-177]		0	1796.95								6890	Redundant	Light	High	Not Found	High	-0.52	0.0001192	0.0006955	2.9
	TRUE	High	[K].VQSLQATFGTFESILR.[S]	1xLabel:13C(6)15N(4) [R16]	0.000732392	9.1126e-05	1	1	1	Q07065	Q07065 [162-177]		0	1806.96								6890	No Quan Values	Heavy	Not Found	High	High	-1.03	0.0001192	0.0004435	3.42
TRUE	High	Master Protein	P29966	Myristoylated alanine-rich C-kinase substrate OS=Homo sapiens OX=9606 GN=MARCKS PE=1 SV=4	0	268.403	39	9	83	9	332	31.5	4.45	379.73	9	Pf02063	4082	ENSG00000277443	MARCKS	E1P560; hsa:4082; P29966; Q2LA83; Q5TDB7	Brain-derived neurotrophic factor (BDNF) signaling pathway	Acetylcholine regulates insulin secretion	Fc gamma R-mediated phagocytosis; MicroRNAs in cancer	4	0	0.624	0.0034837	25.23	124.4	75.6	2.89777e+08	1.46466e+08	High	High	1
	Checked	Confidence	Annotated Sequence	Modifications	Qvality PEP	Qvality q-value	# Protein Groups	# Proteins	# PSMs	Master Protein Accessions	Positions in Master Proteins	Modifications in Master Proteins	# Missed Cleavages	Theo. MH+ [Da]	Abundance Ratio: (Heavy) / (Light)	Abundance Ratio P-Value: (Heavy) / (Light)	Abundance Ratio Variability [%]: (Heavy) / (Light)	Abundances (Grouped): Light	Abundances (Grouped): Heavy	Abundance: F2: Light, Sample	Abundance: F2: Heavy, Sample	Precursor Quan Result ID	Quan Info	Quan Channel	Found in Sample: [S2] F2: Light, Sample	Found in Sample: [S4] F2: Heavy, Sample	Confidence (by Search Engine): Sequest HT	DeltaM [ppm] (by Search Engine): Sequest HT	Percolator q-Value (by Search Engine): Sequest HT	Percolator PEP (by Search Engine): Sequest HT	XCorr (by Search Engine): Sequest HT	Top Apex RT [min]
	TRUE	High	[K].EAPAEGEAAEPGSPTAAEGEAASAASSTSSPK.[A]		7.35428e-08	9.1126e-05	1	1	5	P29966	P29966 [106-137]		0	2915.3								1284	Redundant	Light	High	Peak Found	High	-0.12	0.0001192	3.009e-08	5.99	33.21
	TRUE	High	[K].EAPAEGEAAEPGSPTAAEGEAASAASSTSSPK.[A]	1xLabel:13C(6)15N(2) [K32]	1.34499e-07	9.1126e-05	1	1	4	P29966	P29966 [106-137]		0	2923.32	0.549	0.000408327	0	129.1	70.9	73971528	3.38223e+07	1284		Heavy	Peak Found	High	High	0	0.0001192	5.644e-08	6.01	33.21
	TRUE	High	[K].EELQANGSAPAADKEEPAAAGSGAASPSAAEK.[G]		1.88154e-09	9.1126e-05	1	1	5	P29966	P29966 [56-87]		1	2982.39	0.598	0.00208275	0	125.2	74.8	90671654	4.50863e+07	1400		Light	High	Peak Found	High	0.24	0.0001192	6.608e-10	8.81	21.93
	TRUE	High	[K].EELQANGSAPAADKEEPAAAGSGAASPSAAEK.[G]	1xDeamidated [N6]	4.75888e-10	9.1126e-05	1	1	4	P29966	P29966 [56-87]		1	2983.38	2.973	5.65916e-05	0	50.3	149.7	832635	2.0601e+06	1402		Light	High	Peak Found	High	1.03	0.0001192	1.585e-10	7.93	23.38
	TRUE	High	[K].EELQANGSAPAADKEEPAAAGSGAASPSAAEK.[G]	1xLabel:13C(6)15N(2) [K14]	0.000551791	9.1126e-05	1	1	1	P29966	P29966 [56-87]		1	2990.41									No Quan Values		Not Found	Not Found	High	0.05	0.0001192	0.0003298	4.99
	TRUE	High	[K].EELQANGSAPAADKEEPAAAGSGAASPSAAEK.[G]	2xLabel:13C(6)15N(2) [K14; K32]	1.58503e-08	9.1126e-05	1	1	4	P29966	P29966 [56-87]		1	2998.42								1400	Redundant	Heavy	Peak Found	High	High	-0.15	0.0001192	6.089e-09	6.5	21.93
	TRUE	High	[K].EELQANGSAPAADKEEPAAAGSGAASPSAAEK.[G]	1xDeamidated [N6]; 2xLabel:13C(6)15N(2) [K14; K32]	1.40226e-10	9.1126e-05	1	1	3	P29966	P29966 [56-87]		1	2999.4								1402	Redundant	Heavy	Peak Found	High	High	1.98	0.0001192	4.406e-11	7.97	23.38
	TRUE	High	[K].EELQANGSAPAADKEEPAAAGSGAASPSAAEKGEPAAAAAPEAGASPVEK.[E]		9.5958e-09	9.1126e-05	1	1	1	P29966	P29966 [56-105]		2	4586.18	0.01	1e-17		200		2.44894e+06		1403		Light	High	Not Found	High	1.1	0.0001192	3.602e-09	7	31.34
	TRUE	High	[K].EELQANGSAPAADKEEPAAAGSGAASPSAAEKGEPAAAAAPEAGASPVEK.[E]	1xDeamidated [N6]; 3xLabel:13C(6)15N(2) [K14; K32; K50]	0.00315904	0.000477939	1	1	1	P29966	P29966 [56-105]		2	4611.2								1405	No Quan Values	Heavy	Not Found	High	High	2.85	0.0004125	0.002016	5.07
	TRUE	High	[K].EEPAAAGSGAASPSAAEK.[G]		0.0524091	0.00330196	1	1	1	P29966	P29966 [70-87]		0	1600.74								1421	No Quan Values	Light	High	Not Found	High	0.49	0.002779	0.0377	1.64
	TRUE	High	[K].EEPAAAGSGAASPSAAEKGEPAAAAAPEAGASPVEK.[E]		3.60562e-08	9.1126e-05	1	1	1	P29966	P29966 [70-105]		1	3204.53								1422	Redundant	Light	High	Peak Found	High	1.5	0.0001192	1.433e-08	6.18	27.61
	TRUE	High	[K].EEPAAAGSGAASPSAAEKGEPAAAAAPEAGASPVEK.[E]	2xLabel:13C(6)15N(2) [K18; K36]	1.17139e-07	9.1126e-05	1	1	1	P29966	P29966 [70-105]		1	3220.56	0.526	0.00676404	0	131.1	68.9	1.98453e+06	868690	1422		Heavy	Peak Found	High	High	0.12	0.0001192	4.914e-08	6.08	27.61
	TRUE	High	[K].GEAAAERPGEAAVASSPSKANGQENGHVK.[V]		9.28156e-08	9.1126e-05	1	1	3	P29966	P29966 [12-40]		1	2819.37	0.738	0.0839253	0	115.1	84.9	8.03625e+06	4.93276e+06	2100		Light	High	Peak Found	High	0.43	0.0001192	3.853e-08	5.28	12.64
	TRUE	High	[K].GEAAAERPGEAAVASSPSKANGQENGHVK.[V]	1xDeamidated [N/Q]	1.32707e-09	9.1126e-05	1	1	3	P29966	P29966 [12-40]		1	2820.35	0.65	0.0293888	0	121.2	78.8	2.28005e+06	1.2325e+06	2101		Light	High	Peak Found	High	1.89	0.0001192	4.604e-10	6.44	13.07
	TRUE	High	[K].GEAAAERPGEAAVASSPSKANGQENGHVK.[V]	2xLabel:13C(6)15N(2) [K19; K29]; 1xLabel:13C(6)15N(4) [R7]	6.5189e-07	9.1126e-05	1	1	2	P29966	P29966 [12-40]		1	2845.4								2100	Redundant	Heavy	Peak Found	High	High	-0.44	0.0001192	2.938e-07	5.66	12.64
	TRUE	High	[K].GEAAAERPGEAAVASSPSKANGQENGHVK.[V]	1xDeamidated [Q/N]; 2xLabel:13C(6)15N(2) [K19; K29]; 1xLabel:13C(6)15N(4) [R7]	1.20968e-06	9.1126e-05	1	1	2	P29966	P29966 [12-40]		1	2846.39								2101	Redundant	Heavy	Peak Found	High	High	1.86	0.0001192	5.573e-07	6.66	13.07
	TRUE	High	[K].GEAAAERPGEAAVASSPSKANGQENGHVKVNGDASPAAAESGAK.[E]		4.28842e-06	9.1126e-05	1	1	1	P29966	P29966 [12-55]		2	4144.99	0.365	5.8457e-06	0	146.6	53.4	4662709	1.41432e+06	2102		Light	High	Peak Found	High	0.21	0.0001192	2.089e-06	5.25	18.82
	TRUE	High	[K].GEAAAERPGEAAVASSPSKANGQENGHVKVNGDASPAAAESGAK.[E]	2xDeamidated [N25; N]	1.15315e-05	9.1126e-05	1	1	3	P29966	P29966 [12-55]		2	4146.96	100	1e-17			200		413341	2104		Light	High	Peak Found	High	4.87	0.0001192	5.87e-06	5.29	19.95
	TRUE	High	[K].GEAAAERPGEAAVASSPSKANGQENGHVKVNGDASPAAAESGAK.[E]	3xLabel:13C(6)15N(2) [K19; K29; K44]; 1xLabel:13C(6)15N(4) [R7]	0.000261072	9.1126e-05	1	1	2	P29966	P29966 [12-55]		2	4179.04								2102	Redundant	Heavy	Peak Found	High	High	0.16	0.0001192	0.0001515	2.35	18.82
	TRUE	High	[K].GEPAAAAAPEAGASPVEK.[E]		3.40565e-10	9.1126e-05	1	1	5	P29966	P29966 [88-105]		0	1622.8	0.6	0.00223206	0	125	75	8.50998e+07	4.24769e+07	2143		Light	High	Peak Found	High	-0.17	0.0001192	1.115e-10	4.67	20.18
	TRUE	High	[K].GEPAAAAAPEAGASPVEK.[E]	1xLabel:13C(6)15N(2) [K18]	2.86016e-10	9.1126e-05	1	1	4	P29966	P29966 [88-105]		0	1630.82								2143	Redundant	Heavy	Peak Found	High	High	-0.19	0.0001192	9.327e-11	5.06	20.18
	TRUE	High	[K].TAAKGEAAAERPGEAAVASSPSKANGQENGHVK.[V]		6.73194e-06	9.1126e-05	1	1	7	P29966	P29966 [8-40]		2	3190.58	0.792	0.122338	0	111.6	88.4	1.78154e+07	1.17418e+07	5885		Light	High	Peak Found	High	-0.3	0.0001192	3.347e-06	4.79	12.62
	TRUE	High	[K].TAAKGEAAAERPGEAAVASSPSKANGQENGHVK.[V]	1xDeamidated [Q/N]	2.21233e-06	9.1126e-05	1	1	4	P29966	P29966 [8-40]		2	3191.57								5886	No Quan Values	Light	High	Not Found	High	2.38	0.0001192	1.047e-06	5.45
	TRUE	High	[K].TAAKGEAAAERPGEAAVASSPSKANGQENGHVK.[V]	1xLabel:13C(6)15N(2) [K4]; 1xLabel:13C(6)15N(4) [R11]	0.0974658	0.00681833	1	1	1	P29966	P29966 [8-40]		2	3208.61									Inconsistently Labeled		Not Found	Not Found	High	0.75	0.005652	0.07294	3.09	13.01
	TRUE	High	[K].TAAKGEAAAERPGEAAVASSPSKANGQENGHVK.[V]	3xLabel:13C(6)15N(2) [K4; K23; K33]; 1xLabel:13C(6)15N(4) [R11]	3.42275e-06	9.1126e-05	1	1	4	P29966	P29966 [8-40]		2	3224.63								5885	Redundant	Heavy	Peak Found	High	High	-0.47	0.0001192	1.655e-06	3.68	12.62
TRUE	High	Master Protein	P07437	Tubulin beta chain OS=Homo sapiens OX=9606 GN=TUBB PE=1 SV=2	0	253.302	45	16	109	3	444	49.6	4.89	364.63	16	Pf00091, Pf03953	203068	ENSG00000183311; ENSG00000196230; ENSG00000224156; ENSG00000227739; ENSG00000229684; ENSG00000232421; ENSG00000232575; ENSG00000235067	TUBB	hsa:203068; P05218; P07437; Q8WUC1; Q9CY33	Alzheimer's disease and miRNA effects; Pathogenic Escherichia coli infection; Parkin-ubiquitin proteasomal system pathway; Alzheimer's disease	Neutrophil degranulation; Potential therapeutics for SARS; Recruitment of NuMA to mitotic centrosomes; Regulation of PLK1 Activity at G2/M Transition; Loss of Nlp from mitotic centrosomes; Recruitment of mitotic centrosome proteins and complexes; Anchoring of the basal body to the plasma membrane; AURKA Activation by TPX2	Phagosome; Gap junction; Alzheimer disease; Parkinson disease; Amyotrophic lateral sclerosis; Huntington disease; Prion disease; Pathways of neurodegeneration; Pathogenic Escherichia coli infection; Salmonella infection	23	3	1.068	0.838606	4.22	95.5	104.5	1.44996e+08	1.3197e+08	High	High	1
	Checked	Confidence	Annotated Sequence	Modifications	Qvality PEP	Qvality q-value	# Protein Groups	# Proteins	# PSMs	Master Protein Accessions	Positions in Master Proteins	Modifications in Master Proteins	# Missed Cleavages	Theo. MH+ [Da]	Abundance Ratio: (Heavy) / (Light)	Abundance Ratio P-Value: (Heavy) / (Light)	Abundance Ratio Variability [%]: (Heavy) / (Light)	Abundances (Grouped): Light	Abundances (Grouped): Heavy	Abundance: F2: Light, Sample	Abundance: F2: Heavy, Sample	Precursor Quan Result ID	Quan Info	Quan Channel	Found in Sample: [S2] F2: Light, Sample	Found in Sample: [S4] F2: Heavy, Sample	Confidence (by Search Engine): Sequest HT	DeltaM [ppm] (by Search Engine): Sequest HT	Percolator q-Value (by Search Engine): Sequest HT	Percolator PEP (by Search Engine): Sequest HT	XCorr (by Search Engine): Sequest HT	Top Apex RT [min]
	TRUE	High	[R].AILVDLEPGTMDSVR.[S]		5.4978e-08	9.1126e-05	2	4	3	P07437; Q9BVA1	P07437 [63-77]; Q9BVA1 [63-77]		0	1615.84	1.043	0.963806	0	97.9	102.1	31015614	26928828	378	Shared	Light	High	Peak Found	High	0.14	0.0001192	2.235e-08	3.75	57.87
	TRUE	High	[R].AILVDLEPGTMDSVR.[S]	1xLabel:13C(6)15N(4) [R15]	4.09272e-07	9.1126e-05	2	4	3	P07437; Q9BVA1	P07437 [63-77]; Q9BVA1 [63-77]		0	1625.84								378	Redundant	Heavy	Peak Found	High	High	0.24	0.0001192	1.8e-07	4.01	57.87
	TRUE	High	[R].AILVDLEPGTMDSVR.[S]	1xOxidation [M11]	6.39778e-06	9.1126e-05	2	4	3	P07437; Q9BVA1	P07437 [63-77]; Q9BVA1 [63-77]		0	1631.83	1.031	0.912755	0	98.5	101.5	26902386	23083666	377	Shared	Light	High	Peak Found	High	0.12	0.0001192	3.175e-06	3.34	49.79
	TRUE	High	[R].AILVDLEPGTMDSVR.[S]	1xOxidation [M11]; 1xLabel:13C(6)15N(4) [R15]	1.32964e-06	9.1126e-05	2	4	4	P07437; Q9BVA1	P07437 [63-77]; Q9BVA1 [63-77]		0	1641.84								377	Redundant	Heavy	Peak Found	High	High	0.14	0.0001192	6.144e-07	3.83	49.79
	TRUE	High	[R].ALTVPELTQQVFDAK.[N]		5.7607e-07	9.1126e-05	1	1	6	P07437	P07437 [283-297]		0	1659.9	1.047	0.979479	0	97.7	102.3	38528242	33572610	420		Light	High	Peak Found	High	0.41	0.0001192	2.574e-07	4.92	64.76
	TRUE	High	[R].ALTVPELTQQVFDAK.[N]	1xLabel:13C(6)15N(2) [K15]	1.23258e-07	9.1126e-05	1	1	6	P07437	P07437 [283-297]		0	1667.91								420	Redundant	Heavy	Peak Found	High	High	0.39	0.0001192	5.184e-08	4.78	64.76
	TRUE	High	[R].EIVHIQAGQCGNQIGAK.[F]	1xCarbamidomethyl [C10]; 1xLabel:13C(6)15N(2) [K17]	0.000716617	9.1126e-05	2	4	1	P07437; Q9BVA1	P07437 [3-19]; Q9BVA1 [3-19]		0	1830.94	4.236	5.04798e-08	0	38.2	161.8	501122	1.76659e+06	1609	Shared	Heavy	Peak Found	High	High	0.28	0.0001192	0.0004313	3.28	25.2
	TRUE	High	[K].EVDEQMLNVQNK.[N]		4.53143e-07	9.1126e-05	3	4	3	P07437; P68371; Q9BVA1	P07437 [325-336]; P68371 [325-336]; Q9BVA1 [325-336]		0	1446.69								1783	Redundant	Light	High	Peak Found	High	0.03	0.0001192	2.007e-07	4.66	29.12
	TRUE	High	[K].EVDEQMLNVQNK.[N]	1xLabel:13C(6)15N(2) [K12]	7.80893e-05	9.1126e-05	3	4	3	P07437; P68371; Q9BVA1	P07437 [325-336]; P68371 [325-336]; Q9BVA1 [325-336]		0	1454.7	1.14	0.662172	0	93.5	106.5	28536984	27073214	1783	Shared	Heavy	Peak Found	High	High	0.43	0.0001192	4.294e-05	4.03	29.12
	TRUE	High	[K].EVDEQMLNVQNK.[N]	1xOxidation [M6]	0.000112331	9.1126e-05	3	4	8	P07437; P68371; Q9BVA1	P07437 [325-336]; P68371 [325-336]; Q9BVA1 [325-336]		0	1462.68	7.445	1e-17	0	23.7	176.3	849329	5.26164e+06	1782	Shared	Light	High	Peak Found	High	-0.59	0.0001192	6.291e-05	2.47	25.06
	TRUE	High	[K].EVDEQMLNVQNK.[N]	1xOxidation [M6]; 1xLabel:13C(6)15N(2) [K12]	0.000770561	9.1126e-05	3	4	3	P07437; P68371; Q9BVA1	P07437 [325-336]; P68371 [325-336]; Q9BVA1 [325-336]		0	1470.7								1782	Redundant	Heavy	Peak Found	High	High	0.79	0.0001192	0.0004662	3.13	23.85
	TRUE	High	[R].FPGQLNADLRK.[L]		0.0503165	0.00320554	5	10	1	P04350; Q9BUF5; P07437; P68371; Q9BVA1	P04350 [242-252]; Q9BUF5 [242-252]; P07437 [242-252]; P68371 [242-252]; Q9BVA1 [242-252]		1	1258.69	0.831	0.277709	0	109.2	90.8	4.60363e+06	3.18391e+06	1946	Shared	Light	High	Peak Found	High	-0.04	0.002713	0.03622	2.47	28.05
	TRUE	High	[R].FPGQLNADLRK.[L]	1xLabel:13C(6)15N(2) [K11]; 1xLabel:13C(6)15N(4) [R10]	0.0175695	0.00149171	5	10	1	P04350; Q9BUF5; P07437; P68371; Q9BVA1	P04350 [242-252]; Q9BUF5 [242-252]; P07437 [242-252]; P68371 [242-252]; Q9BVA1 [242-252]		1	1276.71								1946	Redundant	Heavy	Peak Found	High	High	1.17	0.001344	0.012	2.2	28.05
	TRUE	High	[K].GHYTEGAELVDSVLDVVR.[K]	1xLabel:13C(6)15N(4) [R18]	7.18736e-06	9.1126e-05	3	5	1	P07437; P68371; Q9BVA1	P07437 [104-121]; P68371 [104-121]; Q9BVA1 [104-121]		0	1968.99	1.539	0.100543	0	78.8	121.2	217735	278749	2217	Shared	Heavy	Peak Found	High	High	-0.22	0.0001192	3.583e-06	3.67	72.65
	TRUE	High	[K].GHYTEGAELVDSVLDVVRK.[E]		3.77354e-05	9.1126e-05	3	5	1	P07437; P68371; Q9BVA1	P07437 [104-122]; P68371 [104-122]; Q9BVA1 [104-122]		1	2087.08	1.15	0.602312	0	93	107	501015	479324	2218	Shared	Light	High	Peak Found	High	0.92	0.0001192	2.007e-05	3.72	68.28
	TRUE	High	[K].GHYTEGAELVDSVLDVVRK.[E]	1xLabel:13C(6)15N(2) [K19]; 1xLabel:13C(6)15N(4) [R18]	0.0299897	0.00196171	3	5	2	P07437; P68371; Q9BVA1	P07437 [104-122]; P68371 [104-122]; Q9BVA1 [104-122]		1	2105.1								2218	Redundant	Heavy	Peak Found	High	High	1.39	0.001771	0.02091	2.87	68.28
	TRUE	High	[K].LAVNMVPFPR.[L]		7.95777e-06	9.1126e-05	5	10	2	P04350; Q9BUF5; P07437; P68371; Q9BVA1	P04350 [253-262]; Q9BUF5 [253-262]; P07437 [253-262]; P68371 [253-262]; Q9BVA1 [253-262]		0	1143.63	0.924	0.478691	0	104	96	34044256	26167404	2903	Shared	Light	High	Peak Found	High	-0.1	0.0001192	3.967e-06	3.73	54.03
	TRUE	High	[K].LAVNMVPFPR.[L]	1xLabel:13C(6)15N(4) [R10]	9.82642e-06	9.1126e-05	5	10	2	P04350; Q9BUF5; P07437; P68371; Q9BVA1	P04350 [253-262]; Q9BUF5 [253-262]; P07437 [253-262]; P68371 [253-262]; Q9BVA1 [253-262]		0	1153.64								2903	Redundant	Heavy	Peak Found	High	High	0.04	0.0001192	4.966e-06	3.61	54.03
	TRUE	High	[K].LAVNMVPFPR.[L]	1xOxidation [M5]	1.31445e-05	9.1126e-05	5	10	2	P04350; Q9BUF5; P07437; P68371; Q9BVA1	P04350 [253-262]; Q9BUF5 [253-262]; P07437 [253-262]; P68371 [253-262]; Q9BVA1 [253-262]		0	1159.63								2904	Redundant	Light	High	Peak Found	High	0.43	0.0001192	6.684e-06	3.49	43.93
	TRUE	High	[K].LAVNMVPFPR.[L]	1xOxidation [M5]; 1xLabel:13C(6)15N(4) [R10]	3.07829e-05	9.1126e-05	5	10	2	P04350; Q9BUF5; P07437; P68371; Q9BVA1	P04350 [253-262]; Q9BUF5 [253-262]; P07437 [253-262]; P68371 [253-262]; Q9BVA1 [253-262]		0	1169.64	0.978	0.691914	0	101.1	98.9	25273520	20572971	2904	Shared	Heavy	Peak Found	High	High	-0.27	0.0001192	1.629e-05	3.23	43.93
	TRUE	High	[R].LHFFMPGFAPLTSR.[G]		9.8679e-07	9.1126e-05	5	8	4	P04350; Q9BUF5; P07437; P68371; Q9BVA1	P04350 [263-276]; Q9BUF5 [263-276]; P07437 [263-276]; P68371 [263-276]; Q9BVA1 [263-276]		0	1620.84								3232	Redundant	Light	High	Peak Found	High	0.2	0.0001192	4.512e-07	4.2	70.68
	TRUE	High	[R].LHFFMPGFAPLTSR.[G]	1xLabel:13C(6)15N(4) [R14]	5.53164e-06	9.1126e-05	5	8	3	P04350; Q9BUF5; P07437; P68371; Q9BVA1	P04350 [263-276]; Q9BUF5 [263-276]; P07437 [263-276]; P68371 [263-276]; Q9BVA1 [263-276]		0	1630.84	1.065	0.843389	0	96.9	103.1	2.55908e+06	2.267e+06	3232	Shared	Heavy	Peak Found	High	High	0.26	0.0001192	2.723e-06	4.16	70.68
	TRUE	High	[R].LHFFMPGFAPLTSR.[G]	1xOxidation [M5]	2.67287e-06	9.1126e-05	5	8	2	P04350; Q9BUF5; P07437; P68371; Q9BVA1	P04350 [263-276]; Q9BUF5 [263-276]; P07437 [263-276]; P68371 [263-276]; Q9BVA1 [263-276]		0	1636.83	0.931	0.545837	0	103.6	96.4	7.26984e+06	5.63018e+06	3233	Shared	Light	High	Peak Found	High	0.18	0.0001192	1.274e-06	3.43	61.46
	TRUE	High	[R].LHFFMPGFAPLTSR.[G]	1xOxidation [M5]; 1xLabel:13C(6)15N(4) [R14]	2.30125e-05	9.1126e-05	5	8	5	P04350; Q9BUF5; P07437; P68371; Q9BVA1	P04350 [263-276]; Q9BUF5 [263-276]; P07437 [263-276]; P68371 [263-276]; Q9BVA1 [263-276]		0	1646.84								3233	Redundant	Heavy	Peak Found	High	High	0.34	0.0001192	1.199e-05	3.05	61.46
	TRUE	High	[R].IMNTFSVVPSPK.[V]		1.88519e-06	9.1126e-05	3	4	3	P04350; P07437; P68371	P04350 [163-174]; P07437 [163-174]; P68371 [163-174]		0	1319.7	0.963	0.628037	0	101.9	98.1	46817812	37497300	3523	Shared	Light	High	Peak Found	High	0.41	0.0001192	8.845e-07	3.62	45.09
	TRUE	High	[R].IMNTFSVVPSPK.[V]	1xLabel:13C(6)15N(2) [K12]	2.41409e-06	9.1126e-05	3	4	2	P04350; P07437; P68371	P04350 [163-174]; P07437 [163-174]; P68371 [163-174]		0	1327.72								3523	Redundant	Heavy	Peak Found	High	High	0.66	0.0001192	1.148e-06	4.04	45.09
	TRUE	High	[R].IMNTFSVVPSPK.[V]	1xOxidation [M2]	6.15041e-07	9.1126e-05	3	4	3	P04350; P07437; P68371	P04350 [163-174]; P07437 [163-174]; P68371 [163-174]		0	1335.7	0.95	0.579898	0	102.5	97.5	2.86897e+07	2.26884e+07	3524	Shared	Light	High	Peak Found	High	0.56	0.0001192	2.752e-07	3.61	37.76
	TRUE	High	[R].IMNTFSVVPSPK.[V]	1xOxidation [M2]; 1xLabel:13C(6)15N(2) [K12]	4.61195e-06	9.1126e-05	3	4	4	P04350; P07437; P68371	P04350 [163-174]; P07437 [163-174]; P68371 [163-174]		0	1343.71								3524	Redundant	Heavy	Peak Found	High	High	0.53	0.0001192	2.251e-06	4.06	37.76
	TRUE	High	[R].ISEQFTAMFR.[R]		0.00479458	0.000596234	4	6	1	P04350; P07437; P68371; Q9BVA1	P04350 [381-390]; P07437 [381-390]; P68371 [381-390]; Q9BVA1 [381-390]		0	1229.6	0.01	1e-17		200		1074696		3757	Shared	Light	High	Not Found	High	2.32	0.0005035	0.003103	3.2	53.13
	TRUE	High	[R].ISEQFTAMFR.[R]	1xOxidation [M8]	0.0568386	0.00387987	4	6	1	P04350; P07437; P68371; Q9BVA1	P04350 [381-390]; P07437 [381-390]; P68371 [381-390]; Q9BVA1 [381-390]		0	1245.59	1.252	0.494635	0	88.8	111.2	1.46297e+06	1.52385e+06	3758	Shared	Light	High	Peak Found	High	0.81	0.003217	0.04102	2.24	39.68
	TRUE	High	[R].ISVYYNEATGGK.[Y]		2.10251e-06	9.1126e-05	1	1	2	P07437	P07437 [47-58]		0	1301.64	1.21	0.446049	0	90.5	109.5	30548160	30765570	3814		Light	High	Peak Found	High	-0.22	0.0001192	9.909e-07	3.64	26.82
	TRUE	High	[R].ISVYYNEATGGKYVPR.[A]		0.000227395	9.1126e-05	1	1	2	P07437	P07437 [47-62]		1	1816.92	1.089	0.852764	0	95.8	104.2	1.75002e+07	1.58532e+07	3815		Light	High	Peak Found	High	1.02	0.0001192	0.0001304	3.57	36.15
	TRUE	High	[R].ISVYYNEATGGKYVPR.[A]	1xLabel:13C(6)15N(2) [K12]; 1xLabel:13C(6)15N(4) [R16]	0.0174456	0.00149171	1	1	1	P07437	P07437 [47-62]		1	1834.95								3815	Redundant	Heavy	Peak Found	High	High	0.47	0.001344	0.01187	3.12	36.15
	TRUE	High	[K].NSSYFVEWIPNNVK.[TV]		3.91796e-07	9.1126e-05	5	7	4	P04350; Q9BUF5; P07437; P68371; Q9BVA1	P04350 [337-350]; Q9BUF5 [337-350]; P07437 [337-350]; P68371 [337-350]; Q9BVA1 [337-350]		0	1696.83	1.003	0.795889	0	99.8	100.2	2.12191e+07	1.77149e+07	4842	Shared	Light	High	Peak Found	High	-0.41	0.0001192	1.723e-07	4	63.47
	TRUE	High	[K].NSSYFVEWIPNNVK.[TV]	1xLabel:13C(6)15N(2) [K14]	1.1413e-06	9.1126e-05	5	7	2	P04350; Q9BUF5; P07437; P68371; Q9BVA1	P04350 [337-350]; Q9BUF5 [337-350]; P07437 [337-350]; P68371 [337-350]; Q9BVA1 [337-350]		0	1704.85								4842	Redundant	Heavy	Peak Found	High	High	-0.07	0.0001192	5.258e-07	3.56	63.47
	TRUE	High	[R].SGPFGQIFRPDNFVFGQSGAGNNWAK.[G]		2.90207e-10	9.1126e-05	4	5	2	P04350; P07437; P68371; Q9BVA1	P04350 [78-103]; P07437 [78-103]; P68371 [78-103]; Q9BVA1 [78-103]		0	2798.34								5457	Redundant	Light	High	Peak Found	High	-0.15	0.0001192	9.448e-11	6.39	72.29
	TRUE	High	[R].SGPFGQIFRPDNFVFGQSGAGNNWAK.[G]	1xLabel:13C(6)15N(2) [K26]; 1xLabel:13C(6)15N(4) [R9]	4.99209e-11	9.1126e-05	4	5	2	P04350; P07437; P68371; Q9BVA1	P04350 [78-103]; P07437 [78-103]; P68371 [78-103]; Q9BVA1 [78-103]		0	2816.37	0.863	0.61459	0	107.4	92.6	609997	437890	5457	Shared	Heavy	Peak Found	High	High	-0.52	0.0001192	1.51e-11	5.8	72.29
	TRUE	High	[R].YLTVAAVFR.[G]		0.000638035	9.1126e-05	3	3	2	P04350; P07437; P68371	P04350 [310-318]; P07437 [310-318]; P68371 [310-318]		0	1039.59	1.216	0.453005	0	90.2	109.8	4062615	4.1119e+06	7210	Shared	Light	High	Peak Found	High	-0.25	0.0001192	0.0003821	1.97	54.26
	TRUE	High	[R].YLTVAAVFR.[G]	1xLabel:13C(6)15N(4) [R9]	0.0022184	0.000224419	3	3	2	P04350; P07437; P68371	P04350 [310-318]; P07437 [310-318]; P68371 [310-318]		0	1049.6								7210	Redundant	Heavy	Peak Found	High	High	-0.55	0.0002185	0.001404	2.14	54.26
TRUE	High	Master Protein	O14828	Secretory carrier-associated membrane protein 3 OS=Homo sapiens OX=9606 GN=SCAMP3 PE=1 SV=3	0	243.992	36	9	90	9	347	38.3	7.64	342.27	9	Pf04144	10067	ENSG00000116521; ENSG00000263290	SCAMP3	A9Z1W6; B1AVS6; hsa:10067; O14828; O15128; Q96FR8; Q9BPY0				0	0	0.883	0.366945	34.01	106.4	93.6	5.11445e+08	3.74536e+08	High	High	1
	Checked	Confidence	Annotated Sequence	Modifications	Qvality PEP	Qvality q-value	# Protein Groups	# Proteins	# PSMs	Master Protein Accessions	Positions in Master Proteins	Modifications in Master Proteins	# Missed Cleavages	Theo. MH+ [Da]	Abundance Ratio: (Heavy) / (Light)	Abundance Ratio P-Value: (Heavy) / (Light)	Abundance Ratio Variability [%]: (Heavy) / (Light)	Abundances (Grouped): Light	Abundances (Grouped): Heavy	Abundance: F2: Light, Sample	Abundance: F2: Heavy, Sample	Precursor Quan Result ID	Quan Info	Quan Channel	Found in Sample: [S2] F2: Light, Sample	Found in Sample: [S4] F2: Heavy, Sample	Confidence (by Search Engine): Sequest HT	DeltaM [ppm] (by Search Engine): Sequest HT	Percolator q-Value (by Search Engine): Sequest HT	Percolator PEP (by Search Engine): Sequest HT	XCorr (by Search Engine): Sequest HT	Top Apex RT [min]
	TRUE	High	[K].AQQEFAAGVFSNPAVR.[T]		4.06766e-09	9.1126e-05	1	1	5	O14828	O14828 [314-329]		0	1691.85	0.998	0.771829	0	100.1	99.9	123935660	1.02875e+08	564		Light	High	Peak Found	High	-0.38	0.0001192	1.48e-09	4.84	48.55
	TRUE	High	[K].AQQEFAAGVFSNPAVR.[T]	1xLabel:13C(6)15N(4) [R16]	3.68516e-08	9.1126e-05	1	1	6	O14828	O14828 [314-329]		0	1701.86								564	Redundant	Heavy	Peak Found	High	High	0.09	0.0001192	1.465e-08	4.96	48.55
	TRUE	High	[R].DGGNPFAEPSELDNPFQDPAVIQHRPSR.[Q]		4.64562e-06	9.1126e-05	1	1	6	O14828	O14828 [6-33]		0	3090.47	0.606	0.00267979	0	124.5	75.5	5.45295e+07	27495579	899		Light	High	Peak Found	High	-0.4	0.0001192	2.272e-06	4.92	59.21
	TRUE	High	[R].DGGNPFAEPSELDNPFQDPAVIQHRPSR.[Q]	2xLabel:13C(6)15N(4) [R25; R28]	2.22165e-07	9.1126e-05	1	1	4	O14828	O14828 [6-33]		0	3110.48								899	Redundant	Heavy	Peak Found	High	High	-0.29	0.0001192	9.548e-08	5.17	59.21
	TRUE	High	[R].EPPPAYEPPAPAPLPPPSAPSLQPSR.[K]		1.5899e-07	9.1126e-05	1	1	6	O14828	O14828 [48-73]		0	2660.37	0.129	1e-17	0	177.1	22.9	24443203	2.62554e+06	1661		Light	High	Peak Found	High	-0.24	0.0001192	6.746e-08	4.68	53.94
	TRUE	High	[R].EPPPAYEPPAPAPLPPPSAPSLQPSR.[K]	1xLabel:13C(6)15N(4) [R26]	0.029781	0.00186923	1	1	2	O14828	O14828 [48-73]		0	2670.38								1661	Redundant	Heavy	Peak Found	High	High	2.2	0.001704	0.02083	2.43	54.08
	TRUE	High	[R].EPPPAYEPPAPAPLPPPSAPSLQPSRK.[L]		4.05821e-05	9.1126e-05	1	1	6	O14828	O14828 [48-74]		1	2788.47	0.522	0.000134587	0	131.4	68.6	23404734	10158592	1663		Light	High	Peak Found	High	-0.67	0.0001192	2.172e-05	2.61	47.63
	TRUE	High	[R].EPPPAYEPPAPAPLPPPSAPSLQPSRK.[L]	1xLabel:13C(6)15N(2) [K27]; 1xLabel:13C(6)15N(4) [R26]	0.0047262	0.000596234	1	1	1	O14828	O14828 [48-74]		1	2806.49								1663	Redundant	Heavy	Peak Found	High	High	-0.43	0.0005035	0.003074	2.88	47.63
	TRUE	High	[K].NYGSYSTQASAAAATAELLK.[K]		8.48933e-11	9.1126e-05	1	1	2	O14828	O14828 [82-101]		0	2016.99	1.126	0.711669	0	94.1	105.9	1.16648e+07	1.09305e+07	4892		Light	High	Peak Found	High	-0.23	0.0001192	2.612e-11	4.93	55.37
	TRUE	High	[K].NYGSYSTQASAAAATAELLK.[K]	1xLabel:13C(6)15N(2) [K20]	2.89317e-11	9.1126e-05	1	1	3	O14828	O14828 [82-101]		0	2025								4892	Redundant	Heavy	Peak Found	High	High	0.91	0.0001192	8.536e-12	6.1	55.37
	TRUE	High	[K].NYGSYSTQASAAAATAELLKK.[Q]	2xLabel:13C(6)15N(2) [K20; K21]	0.000127111	9.1126e-05	1	1	2	O14828	O14828 [82-102]		1	2161.11								4893	Redundant	Heavy	Peak Found	High	High	-1.22	0.0001192	7.128e-05	3.51	48.93
	TRUE	High	[R].QYATLDVYNPFETR.[E]		5.53793e-08	9.1126e-05	1	1	2	O14828	O14828 [34-47]		0	1716.82	0.985	0.719214	0	100.8	99.2	14500181	11883323	5180		Light	High	Peak Found	High	-0.09	0.0001192	2.252e-08	4.62	63.34
	TRUE	High	[R].QYATLDVYNPFETR.[E]	1xLabel:13C(6)15N(4) [R14]	6.28609e-07	9.1126e-05	1	1	3	O14828	O14828 [34-47]		0	1726.83								5180	Redundant	Heavy	Peak Found	High	High	0.5	0.0001192	2.828e-07	4.11	63.34
	TRUE	High	[R].TAAANAAAGAAENAFR.[A]		5.10221e-11	9.1126e-05	1	1	6	O14828	O14828 [330-345]		0	1476.72								5881	Redundant	Light	High	Peak Found	High	-0.28	0.0001192	1.536e-11	5.07	34.22
	TRUE	High	[R].TAAANAAAGAAENAFR.[A]	1xLabel:13C(6)15N(4) [R16]	2.75801e-10	9.1126e-05	1	1	5	O14828	O14828 [330-345]		0	1486.73	0.936	0.522659	0	103.3	96.7	80316286	62523054	5881		Heavy	Peak Found	High	High	0.22	0.0001192	8.961e-11	5.47	34.22
	TRUE	High	[R].TAAANAAAGAAENAFRAP.[-]		1.06571e-07	9.1126e-05	1	1	4	O14828	O14828 [330-347]		1	1644.81								5882	Redundant	Light	High	Peak Found	High	-0.33	0.0001192	4.433e-08	4.91	41.85
	TRUE	High	[R].TAAANAAAGAAENAFRAP.[-]	1xLabel:13C(6)15N(4) [R16]	2.61814e-08	9.1126e-05	1	1	4	O14828	O14828 [330-347]		1	1654.82	0.833	0.204854	0	109.1	90.9	109021800	75609866	5882		Heavy	Peak Found	High	High	-0.38	0.0001192	1.028e-08	4.27	41.85
TRUE	High	Master Protein	P49327	Fatty acid synthase OS=Homo sapiens OX=9606 GN=FASN PE=1 SV=3	0	243.754	16	30	82	30	2511	273.3	6.44	246.91	30	Pf00107, Pf00109, Pf00550, Pf00698, Pf00975, Pf02801, Pf08242, Pf08659, Pf14765, Pf16197	2194	ENSG00000169710	FASN	hsa:2194; P49327; Q13479; Q16702; Q4LE83; Q6P4U5; Q6SS02; Q969R1; Q96C68; Q96IT0	AMP-activated protein kinase (AMPK) signaling; Sterol regulatory element-binding proteins (SREBP) signaling; SREBF and miR33 in cholesterol and lipid homeostasis; Liver X receptor pathway; Nuclear receptors meta-pathway; Fatty acid biosynthesis; Angiopoietin-like protein 8 regulatory pathway; Lipid metabolism pathway; Clear cell renal cell carcinoma pathways; Metabolic reprogramming in colon canc…	Vitamin B5 (pantothenate) metabolism; ChREBP activates metabolic gene expression; Activation of gene expression by SREBF (SREBP); Fatty acyl-CoA biosynthesis; NR1H2 & NR1H3 regulate gene expression linked to lipogenesis	Fatty acid biosynthesis; Metabolic pathways; Fatty acid metabolism; AMPK signaling pathway; Insulin signaling pathway	23	0	1.049	0.920228	10.95	96.4	103.6	1.55651e+08	1.39245e+08	High	High	1
	Checked	Confidence	Annotated Sequence	Modifications	Qvality PEP	Qvality q-value	# Protein Groups	# Proteins	# PSMs	Master Protein Accessions	Positions in Master Proteins	Modifications in Master Proteins	# Missed Cleavages	Theo. MH+ [Da]	Abundance Ratio: (Heavy) / (Light)	Abundance Ratio P-Value: (Heavy) / (Light)	Abundance Ratio Variability [%]: (Heavy) / (Light)	Abundances (Grouped): Light	Abundances (Grouped): Heavy	Abundance: F2: Light, Sample	Abundance: F2: Heavy, Sample	Precursor Quan Result ID	Quan Info	Quan Channel	Found in Sample: [S2] F2: Light, Sample	Found in Sample: [S4] F2: Heavy, Sample	Confidence (by Search Engine): Sequest HT	DeltaM [ppm] (by Search Engine): Sequest HT	Percolator q-Value (by Search Engine): Sequest HT	Percolator PEP (by Search Engine): Sequest HT	XCorr (by Search Engine): Sequest HT	Top Apex RT [min]
	TRUE	High	[K].AGLYGLPR.[R]	1xLabel:13C(6)15N(4) [R8]	0.00430472	0.000596234	1	1	2	P49327	P49327 [42-49]		0	856.491	1.039	0.95294	0	98.1	101.9	6.66662e+06	5762181	239		Heavy	Peak Found	High	High	-0.38	0.0005035	0.002776	2.07	32.24
	TRUE	High	[R].DGAWGAFR.[H]		0.0727534	0.00489315	1	1	1	P49327	P49327 [1508-1515]		0	879.411	1.297	0.383678	0	87.1	112.9	1.53234e+06	1.65376e+06	883		Light	High	Peak Found	High	-0.24	0.00405	0.05339	1.79	37.56
	TRUE	High	[R].DTSFEQHVLWHTGGK.[G]	1xLabel:13C(6)15N(2) [K15]	0.0237974	0.00166208	1	1	2	P49327	P49327 [1725-1739]		0	1749.84	1.206	0.514892	0	90.7	109.3	5.00482e+06	5.02187e+06	1168		Heavy	Peak Found	High	High	-0.13	0.001546	0.01646	2.31	37.17
	TRUE	High	[K].EDGLAQQQTQLNLR.[S]		1.58807e-05	9.1126e-05	1	1	1	P49327	P49327 [2207-2220]		0	1613.82	1.158	0.603159	0	92.7	107.3	17077288	16450194	1330		Light	High	Peak Found	High	-0.5	0.0001192	8.19e-06	3.77	34.06
	TRUE	High	[K].EDGLAQQQTQLNLR.[S]	1xLabel:13C(6)15N(4) [R14]	7.50795e-06	9.1126e-05	1	1	1	P49327	P49327 [2207-2220]		0	1623.83								1330	Redundant	Heavy	Peak Found	High	High	2.91	0.0001192	3.749e-06	3.91	34.06
	TRUE	High	[K].EQGVTFPSGDIQEQLIR.[S]		3.77803e-07	9.1126e-05	1	1	1	P49327	P49327 [258-274]		0	1916.97	0.984	0.789981	0	100.8	99.2	1.78816e+06	1.464e+06	1676		Light	High	Peak Found	High	1.31	0.0001192	1.662e-07	3.53	57.55
	TRUE	High	[K].EQGVTFPSGDIQEQLIR.[S]	1xLabel:13C(6)15N(4) [R17]	0.00181198	0.000224419	1	1	1	P49327	P49327 [258-274]		0	1926.98								1676	Redundant	Heavy	Peak Found	High	High	-1.53	0.0002185	0.001131	3.13	57.55
	TRUE	High	[R].FDASFFGVHPK.[Q]		1.11667e-06	9.1126e-05	1	1	2	P49327	P49327 [60-70]		0	1251.62	1.126	0.724389	0	94.1	105.9	6384442	5.98405e+06	1856		Light	High	Peak Found	High	0.64	0.0001192	5.138e-07	2.7	47.36
	TRUE	High	[R].FDASFFGVHPK.[Q]	1xLabel:13C(6)15N(2) [K11]	5.06931e-06	9.1126e-05	1	1	2	P49327	P49327 [60-70]		0	1259.63								1856	Redundant	Heavy	Peak Found	High	High	-0.12	0.0001192	2.487e-06	2.67	47.36
	TRUE	High	[R].FPQLDSTSFANSR.[D]		2.68099e-05	9.1126e-05	1	1	2	P49327	P49327 [1712-1724]		0	1469.7	1.017	0.853098	0	99.2	100.8	15861381	13422107	1948		Light	High	Peak Found	High	0.2	0.0001192	1.412e-05	3.71	45.11
	TRUE	High	[R].FPQLDSTSFANSR.[D]	1xLabel:13C(6)15N(4) [R13]	3.66535e-05	9.1126e-05	1	1	2	P49327	P49327 [1712-1724]		0	1479.71								1948	Redundant	Heavy	Peak Found	High	High	-0.35	0.0001192	1.957e-05	3.85	45.11
	TRUE	High	[K].GLVQALQTK.[V]		0.0021397	0.000224419	1	1	2	P49327	P49327 [1143-1151]		0	957.573	1.381	0.186727	0	84	116	6.87536e+06	7903694	2319		Light	High	Peak Found	High	-0.25	0.0002185	0.001353	2.25	27.84
	TRUE	High	[K].GLVQALQTK.[V]	1xLabel:13C(6)15N(2) [K9]	0.00142705	9.1126e-05	1	1	1	P49327	P49327 [1143-1151]		0	965.587								2319	Redundant	Heavy	Peak Found	High	High	0.98	0.0001192	0.000883	2.65	27.84
	TRUE	High	[R].GNAGQSNYGFANSAMER.[I]		1.41524e-07	9.1126e-05	1	1	1	P49327	P49327 [2027-2043]		0	1773.76								2330	Redundant	Light	High	Peak Found	High	0.3	0.0001192	5.969e-08	3.99	30.98
	TRUE	High	[R].GNAGQSNYGFANSAMER.[I]	1xLabel:13C(6)15N(4) [R17]	5.22489e-08	9.1126e-05	1	1	2	P49327	P49327 [2027-2043]		0	1783.77	1.041	0.95241	0	98	102	4834335	4.18828e+06	2330		Heavy	Peak Found	High	High	0.46	0.0001192	2.115e-08	3.96	30.98
	TRUE	High	[R].GNAGQSNYGFANSAMER.[I]	1xOxidation [M15]	9.69558e-08	9.1126e-05	1	1	1	P49327	P49327 [2027-2043]		0	1789.76	1.113	0.728119	0	94.7	105.3	982584	909821	2329		Light	High	Peak Found	High	-0.95	0.0001192	4.018e-08	3.48	22.14
	TRUE	High	[R].GNAGQSNYGFANSAMER.[I]	1xOxidation [M15]; 1xLabel:13C(6)15N(4) [R17]	1.87724e-05	9.1126e-05	1	1	1	P49327	P49327 [2027-2043]		0	1799.76								2329	Redundant	Heavy	Peak Found	High	High	-0.38	0.0001192	9.714e-06	3.46	22.14
	TRUE	High	[R].GTPLISPLIK.[W]		0.0583904	0.00407232	1	1	1	P49327	P49327 [826-835]		0	1038.66	0.965	0.612558	0	101.8	98.2	9649583	7746389	2459		Light	High	Peak Found	High	-0.5	0.003365	0.0424	1.56	47.09
	TRUE	High	[K].GVDLVLNSLAEEK.[L]		3.68098e-06	9.1126e-05	1	1	2	P49327	P49327 [1740-1752]		0	1386.75								2477	Redundant	Light	High	Peak Found	High	-0.33	0.0001192	1.78e-06	4.1	54.78
	TRUE	High	[K].GVDLVLNSLAEEK.[L]	1xLabel:13C(6)15N(2) [K13]	1.96098e-05	9.1126e-05	1	1	3	P49327	P49327 [1740-1752]		0	1394.76	1.091	0.867762	0	95.6	104.4	5427671	4.92855e+06	2477		Heavy	Peak Found	High	High	-1.58	0.0001192	1.016e-05	3.35	54.78
	TRUE	High	[R].LFDHPESPTPNPTEPLFLAQAEVYK.[E]		8.16764e-07	9.1126e-05	1	1	2	P49327	P49327 [968-992]		0	2840.41	1.069	0.803859	0	96.7	103.3	390335	347093	3073		Light	High	Peak Found	High	-1.41	0.0001192	3.712e-07	4.55	67.94
	TRUE	High	[R].LFDHPESPTPNPTEPLFLAQAEVYK.[E]	1xLabel:13C(6)15N(2) [K25]	1.41362e-05	9.1126e-05	1	1	1	P49327	P49327 [968-992]		0	2848.43								3073	Redundant	Heavy	Peak Found	High	High	1.15	0.0001192	7.256e-06	3.72	67.94
	TRUE	High	[R].LFDHPESPTPNPTEPLFLAQAEVYK.[E]	1xDeamidated [N11]; 1xLabel:13C(6)15N(2) [K25]	0.00814751	0.000914196	1	1	1	P49327	P49327 [968-992]		0	2849.41	0.01	1e-17		200		599984		3074		Heavy	Peak Found	High	High	4.75	0.0008339	0.005387	3.36
	TRUE	High	[K].LPEDPLLSGLLDSPALK.[A]		0.000264895	9.1126e-05	1	1	1	P49327	P49327 [1209-1225]		0	1777.99	0.79	0.461971	0	111.7	88.3	258231	169813	3594		Light	High	Peak Found	High	-0.2	0.0001192	0.0001529	4.23	79.18
	TRUE	High	[K].LPEDPLLSGLLDSPALK.[A]	1xLabel:13C(6)15N(2) [K17]	0.000211451	9.1126e-05	1	1	1	P49327	P49327 [1209-1225]		0	1786.01								3594	Redundant	Heavy	Peak Found	High	High	0.81	0.0001192	0.0001211	4.14	79.18
	TRUE	High	[R].LQVVDQPLPVR.[G]		0.00210901	0.000224419	1	1	2	P49327	P49327 [374-384]		0	1263.74	0.887	0.352872	0	106	94	11430260	8436527	3707		Light	High	Peak Found	High	0.79	0.0002185	0.001333	1.89	40.3
	TRUE	High	[R].LQVVDQPLPVR.[G]	1xLabel:13C(6)15N(4) [R11]	0.000701181	9.1126e-05	1	1	1	P49327	P49327 [374-384]		0	1273.75								3707	Redundant	Heavy	Peak Found	High	High	0.14	0.0001192	0.0004237	3.4	40.3
	TRUE	High	[K].MKVVEVLAGHGHLYSR.[I]	1xLabel:13C(6)15N(2) [K2]; 1xLabel:13C(6)15N(4) [R16]	0.000473734	9.1126e-05	1	1	1	P49327	P49327 [1240-1255]		1	1813.99	1.111	0.653806	0	94.8	105.2	13037.3	12049.7	4336		Heavy	Peak Found	High	High	0.32	0.0001192	0.0002802	3.7	118.52
	TRUE	High	[K].MVVPGLDGAQIPR.[D]		0.0330633	0.0020598	1	1	1	P49327	P49327 [1159-1171]		0	1352.74	0.825	0.304005	0	109.6	90.4	3.7014e+06	2.54126e+06	4575		Light	High	Peak Found	High	0.49	0.001844	0.02327	2.6	52.01
	TRUE	High	[R].QGVQVQVSTSNISSLEGAR.[G]		3.42275e-06	9.1126e-05	1	1	1	P49327	P49327 [1935-1953]		0	1960.01								4999	No Quan Values	Light	High	Not Found	High	1.54	0.0001192	1.656e-06	3.63
	TRUE	High	[R].QGVQVQVSTSNISSLEGAR.[G]	1xLabel:13C(6)15N(4) [R19]	1.31044e-06	9.1126e-05	1	1	1	P49327	P49327 [1935-1953]		0	1970.02								4999	Redundant	Heavy	Not Found	High	High	2.23	0.0001192	6.076e-07	4.23
	TRUE	High	[R].RPTPQDSPIFLPVDDTSFR.[W]		6.98126e-06	9.1126e-05	1	1	1	P49327	P49327 [1405-1423]		0	2188.1	0.728	0.156147	0	115.7	84.3	3.46117e+06	2.09807e+06	5248		Light	High	Peak Found	High	-0.37	0.0001192	3.47e-06	3.35	59.44
	TRUE	High	[R].RPTPQDSPIFLPVDDTSFR.[W]	2xLabel:13C(6)15N(4) [R1; R19]	8.45926e-05	9.1126e-05	1	1	1	P49327	P49327 [1405-1423]		0	2208.12								5248	Redundant	Heavy	Peak Found	High	High	-0.11	0.0001192	4.679e-05	3.98	59.44
	TRUE	High	[R].RQQEQQVPILEK.[F]		0.000199504	9.1126e-05	1	1	1	P49327	P49327 [1105-1116]		1	1495.82	1.09	0.756382	0	95.7	104.3	2.47173e+06	2.24181e+06	5252		Light	High	Peak Found	High	0.15	0.0001192	0.0001138	2.54	20.88
	TRUE	High	[R].SEGVVAVLLTK.[K]		0.00119066	9.1126e-05	1	1	1	P49327	P49327 [225-235]		0	1115.67	1.858	0.0102766	0	70	130	2.23141e+06	3450454	5366		Light	High	Peak Found	High	0.42	0.0001192	0.0007331	2.18	51.32
	TRUE	High	[R].SEGVVAVLLTKK.[S]		0.00643384	0.000694413	1	1	1	P49327	P49327 [225-236]		1	1243.76	1.475	0.106625	0	80.8	119.2	2.28689e+06	2.80763e+06	5367		Light	High	Peak Found	High	-0.02	0.0005813	0.00423	2.78	41.71
	TRUE	High	[R].SLLVNPEGPTLMR.[L]		0.000264895	9.1126e-05	1	1	1	P49327	P49327 [2221-2233]		0	1426.77	0.998	0.735226	0	100.1	99.9	7523673	6249110	5545		Light	High	Peak Found	High	0.22	0.0001192	0.0001537	2.74	51.83
	TRUE	High	[R].SLLVNPEGPTLMR.[L]	1xLabel:13C(6)15N(4) [R13]	0.000580565	9.1126e-05	1	1	2	P49327	P49327 [2221-2233]		0	1436.78								5545	Redundant	Heavy	Peak Found	High	High	0.58	0.0001192	0.0003475	3.04	51.83
	TRUE	High	[R].SLLVNPEGPTLMR.[L]	1xOxidation [M12]	9.23061e-05	9.1126e-05	1	1	1	P49327	P49327 [2221-2233]		0	1442.77	0.977	0.672228	0	101.2	98.8	7.52103e+06	6115496	5546		Light	High	Peak Found	High	0.41	0.0001192	5.108e-05	2.92	43.23
	TRUE	High	[R].SLYQSAGVAPESFEYIEAHGTGTK.[V]		0.00300364	0.000477939	1	1	2	P49327	P49327 [275-298]		0	2542.21	1.014	0.841479	0	99.3	100.7	11745881	9912455	5579		Light	High	Peak Found	High	1.84	0.0004125	0.001912	2.63	54.08
	TRUE	High	[R].SLYQSAGVAPESFEYIEAHGTGTK.[V]	1xLabel:13C(6)15N(2) [K24]	0.00217084	0.000224419	1	1	1	P49327	P49327 [275-298]		0	2550.22								5579	Redundant	Heavy	Peak Found	High	High	0.17	0.0002185	0.001369	2.96	54.08
	TRUE	High	[K].SNMGHPEPASGLAALAK.[V]	1xLabel:13C(6)15N(2) [K17]	0.145094	0.00969737	1	1	1	P49327	P49327 [327-343]		0	1658.84								5613	No Quan Values	Heavy	Not Found	High	High	1.09	0.007952	0.112	2.5
	TRUE	High	[K].SNMGHPEPASGLAALAK.[V]	1xOxidation [M3]	0.00146899	9.1126e-05	1	1	3	P49327	P49327 [327-343]		0	1666.82								5612	Redundant	Light	High	Peak Found	High	-0.17	0.0001192	0.0009133	2.89	28.43
	TRUE	High	[K].SNMGHPEPASGLAALAK.[V]	1xOxidation [M3]; 1xLabel:13C(6)15N(2) [K17]	0.000642684	9.1126e-05	1	1	2	P49327	P49327 [327-343]		0	1674.84	0.879	0.415825	0	106.5	93.5	4.83197e+06	3533313	5612		Heavy	Peak Found	High	High	0.34	0.0001192	0.0003861	2.72	28.43
	TRUE	High	[R].VLEALLPLKGLEER.[V]	1xLabel:13C(6)15N(2) [K9]; 1xLabel:13C(6)15N(4) [R14]	0.000516878	9.1126e-05	1	1	1	P49327	P49327 [2383-2396]		1	1597.96	1.049	0.872679	0	97.6	102.4	645596	563479	6672		Heavy	Peak Found	High	High	0.44	0.0001192	0.0003075	2.58	62
	TRUE	High	[K].VVVQVLAEEPEAVLK.[G]		2.98098e-06	9.1126e-05	1	1	1	P49327	P49327 [1852-1866]		0	1622.94	1.051	0.914677	0	97.5	102.5	2210178	1.93364e+06	6990		Light	High	Peak Found	High	0.21	0.0001192	1.426e-06	3.87	58.26
	TRUE	High	[K].VVVQVLAEEPEAVLK.[G]	1xLabel:13C(6)15N(2) [K15]	9.03142e-05	9.1126e-05	1	1	1	P49327	P49327 [1852-1866]		0	1630.95								6990	Redundant	Heavy	Peak Found	High	High	0.19	0.0001192	5.013e-05	3.13	58.26
	TRUE	High	[R].VYATILNAGTNTDGFK.[E]		3.23906e-05	9.1126e-05	1	1	1	P49327	P49327 [242-257]		0	1684.85	0.01	1e-17		200		754472		7007		Light	High	Not Found	High	-0.03	0.0001192	1.718e-05	3.41	48.3
	TRUE	High	[K].VYQWDDPDPR.[L]		0.0184615	0.00149171	1	1	2	P49327	P49327 [958-967]		0	1290.57								7010	Redundant	Light	High	Peak Found	High	0.18	0.001344	0.01262	2.37	34.32
	TRUE	High	[K].VYQWDDPDPR.[L]	1xLabel:13C(6)15N(4) [R10]	8.521e-05	9.1126e-05	1	1	1	P49327	P49327 [958-967]		0	1300.58	0.918	0.40995	0	104.3	95.7	8733488	6.67237e+06	7010		Heavy	Peak Found	High	High	0.03	0.0001192	4.687e-05	2.86	34.32
	TRUE	High	[R].WKAGLYGLPR.[R]		9.9993e-05	9.1126e-05	1	1	2	P49327	P49327 [40-49]		1	1160.66								7034	Redundant	Light	High	Peak Found	High	0.28	0.0001192	5.547e-05	3.21	41.37
	TRUE	High	[R].WKAGLYGLPR.[R]	1xLabel:13C(6)15N(2) [K2]; 1xLabel:13C(6)15N(4) [R10]	0.000331834	9.1126e-05	1	1	1	P49327	P49327 [40-49]		1	1178.68	1.135	0.635888	0	93.7	106.3	2756127	2.60344e+06	7034		Heavy	Peak Found	High	High	-0.53	0.0001192	0.0001937	2.51	41.37
	TRUE	High	[K].WTSQDSLLGMEFSGR.[D]		0.000140732	9.1126e-05	1	1	1	P49327	P49327 [1592-1606]		0	1713.79								7066	No Quan Values	Light	High	Not Found	High	1.29	0.0001192	7.959e-05	2.99
	TRUE	High	[K].WTSQDSLLGMEFSGR.[D]	1xOxidation [M10]	0.00063342	9.1126e-05	1	1	1	P49327	P49327 [1592-1606]		0	1729.79								7067	No Quan Values	Light	High	Not Found	High	1.81	0.0001192	0.0003791	2.4
TRUE	High	Master Protein	P68371	Tubulin beta-4B chain OS=Homo sapiens OX=9606 GN=TUBB4B PE=1 SV=1	0	242.505	45	16	97	2	445	49.8	4.89	319.4	16	Pf00091, Pf03953	10383	ENSG00000188229	TUBB4B	A2BFA2; hsa:10383; P05217; P68371	Alzheimer's disease and miRNA effects; Pathogenic Escherichia coli infection; Parkin-ubiquitin proteasomal system pathway; Alzheimer's disease	Separation of Sister Chromatids; The role of GTSE1 in G2/M progression after G2 checkpoint; Neutrophil degranulation; COPI-mediated anterograde transport; Resolution of Sister Chromatid Cohesion; Hedgehog 'off' state; HSP90 chaperone cycle for steroid hormone receptors (SHR) in the presence of ligand; RHO GTPases Activate Formins; EML4 and NUDC in mitotic spindle formation; COPI-dependent Golgi-t…	Phagosome; Gap junction; Alzheimer disease; Parkinson disease; Amyotrophic lateral sclerosis; Huntington disease; Prion disease; Pathways of neurodegeneration; Pathogenic Escherichia coli infection; Salmonella infection	51	20	0.97	0.724024	13.13	99.5	100.5	2.61333e+08	2.19573e+08	High	High	1
	Checked	Confidence	Annotated Sequence	Modifications	Qvality PEP	Qvality q-value	# Protein Groups	# Proteins	# PSMs	Master Protein Accessions	Positions in Master Proteins	Modifications in Master Proteins	# Missed Cleavages	Theo. MH+ [Da]	Abundance Ratio: (Heavy) / (Light)	Abundance Ratio P-Value: (Heavy) / (Light)	Abundance Ratio Variability [%]: (Heavy) / (Light)	Abundances (Grouped): Light	Abundances (Grouped): Heavy	Abundance: F2: Light, Sample	Abundance: F2: Heavy, Sample	Precursor Quan Result ID	Quan Info	Quan Channel	Found in Sample: [S2] F2: Light, Sample	Found in Sample: [S4] F2: Heavy, Sample	Confidence (by Search Engine): Sequest HT	DeltaM [ppm] (by Search Engine): Sequest HT	Percolator q-Value (by Search Engine): Sequest HT	Percolator PEP (by Search Engine): Sequest HT	XCorr (by Search Engine): Sequest HT	Top Apex RT [min]
	TRUE	High	[R].ALTVPELTQQMFDAK.[N]		2.27065e-07	9.1126e-05	2	3	5	P04350; P68371	P04350 [283-297]; P68371 [283-297]		0	1691.87								416	Redundant	Light	High	Peak Found	High	0.41	0.0001192	9.783e-08	3.92	66.25
	TRUE	High	[R].ALTVPELTQQMFDAK.[N]	1xLabel:13C(6)15N(2) [K15]	5.20298e-07	9.1126e-05	2	3	2	P04350; P68371	P04350 [283-297]; P68371 [283-297]		0	1699.88	0.953	0.622173	0	102.4	97.6	6.63155e+06	5.25955e+06	416	Shared	Heavy	Peak Found	High	High	-0.36	0.0001192	2.321e-07	3.93	66.25
	TRUE	High	[R].ALTVPELTQQMFDAK.[N]	1xOxidation [M11]	6.46362e-05	9.1126e-05	2	3	1	P04350; P68371	P04350 [283-297]; P68371 [283-297]		0	1707.86								417	Redundant	Light	High	Peak Found	High	-0.13	0.0001192	3.527e-05	3.1	51.93
	TRUE	High	[R].ALTVPELTQQMFDAK.[N]	1xOxidation [M11]; 1xLabel:13C(6)15N(2) [K15]	2.09363e-05	9.1126e-05	2	3	1	P04350; P68371	P04350 [283-297]; P68371 [283-297]		0	1715.88	100	1e-17			200		2.87914e+06	417	Shared	Heavy	Not Found	High	High	0.64	0.0001192	1.087e-05	3.47	51.93
	TRUE	High	[R].AVLVDLEPGTMDSVR.[S]		4.47971e-06	9.1126e-05	2	3	1	P04350; P68371	P04350 [63-77]; P68371 [63-77]		0	1601.82	0.891	0.366899	0	105.7	94.3	14290114	10599301	700	Shared	Light	High	Peak Found	High	0.04	0.0001192	2.186e-06	3.25	54.03
	TRUE	High	[R].AVLVDLEPGTMDSVR.[S]	1xLabel:13C(6)15N(4) [R15]	1.22741e-06	9.1126e-05	2	3	2	P04350; P68371	P04350 [63-77]; P68371 [63-77]		0	1611.83								700	Redundant	Heavy	Peak Found	High	High	0.37	0.0001192	5.668e-07	3.43	54.03
	TRUE	High	[R].AVLVDLEPGTMDSVR.[S]	1xOxidation [M11]	6.10584e-07	9.1126e-05	2	3	2	P04350; P68371	P04350 [63-77]; P68371 [63-77]		0	1617.82	0.912	0.434951	0	104.6	95.4	11208941	8501737	701	Shared	Light	High	Peak Found	High	-0.53	0.0001192	2.737e-07	2.95	45.48
	TRUE	High	[R].AVLVDLEPGTMDSVR.[S]	1xOxidation [M11]; 1xLabel:13C(6)15N(4) [R15]	1.7583e-05	9.1126e-05	2	3	1	P04350; P68371	P04350 [63-77]; P68371 [63-77]		0	1627.82								701	Redundant	Heavy	Peak Found	High	High	-0.05	0.0001192	9.064e-06	3.66	45.48
	TRUE	High	[R].EIVHLQAGQCGNQIGAK.[F]	1xCarbamidomethyl [C10]	0.000619772	9.1126e-05	2	2	1	P04350; P68371	P04350 [3-19]; P68371 [3-19]		0	1822.92								1609	Redundant	Light	High	Peak Found	High	0.3	0.0001192	0.0003705	2.88	25.2
	TRUE	High	[K].EVDEQMLNVQNK.[N]		4.53143e-07	9.1126e-05	3	4	3	P07437; P68371; Q9BVA1	P07437 [325-336]; P68371 [325-336]; Q9BVA1 [325-336]		0	1446.69								1783	Redundant	Light	High	Peak Found	High	0.03	0.0001192	2.007e-07	4.66	29.12
	TRUE	High	[K].EVDEQMLNVQNK.[N]	1xLabel:13C(6)15N(2) [K12]	7.80893e-05	9.1126e-05	3	4	3	P07437; P68371; Q9BVA1	P07437 [325-336]; P68371 [325-336]; Q9BVA1 [325-336]		0	1454.7	1.14	0.662172	0	93.5	106.5	28536984	27073214	1783	Shared	Heavy	Peak Found	High	High	0.43	0.0001192	4.294e-05	4.03	29.12
	TRUE	High	[K].EVDEQMLNVQNK.[N]	1xOxidation [M6]	0.000112331	9.1126e-05	3	4	8	P07437; P68371; Q9BVA1	P07437 [325-336]; P68371 [325-336]; Q9BVA1 [325-336]		0	1462.68	7.445	1e-17	0	23.7	176.3	849329	5.26164e+06	1782	Shared	Light	High	Peak Found	High	-0.59	0.0001192	6.291e-05	2.47	25.06
	TRUE	High	[K].EVDEQMLNVQNK.[N]	1xOxidation [M6]; 1xLabel:13C(6)15N(2) [K12]	0.000770561	9.1126e-05	3	4	3	P07437; P68371; Q9BVA1	P07437 [325-336]; P68371 [325-336]; Q9BVA1 [325-336]		0	1470.7								1782	Redundant	Heavy	Peak Found	High	High	0.79	0.0001192	0.0004662	3.13	23.85
	TRUE	High	[R].FPGQLNADLRK.[L]		0.0503165	0.00320554	5	10	1	P04350; Q9BUF5; P07437; P68371; Q9BVA1	P04350 [242-252]; Q9BUF5 [242-252]; P07437 [242-252]; P68371 [242-252]; Q9BVA1 [242-252]		1	1258.69	0.831	0.277709	0	109.2	90.8	4.60363e+06	3.18391e+06	1946	Shared	Light	High	Peak Found	High	-0.04	0.002713	0.03622	2.47	28.05
	TRUE	High	[R].FPGQLNADLRK.[L]	1xLabel:13C(6)15N(2) [K11]; 1xLabel:13C(6)15N(4) [R10]	0.0175695	0.00149171	5	10	1	P04350; Q9BUF5; P07437; P68371; Q9BVA1	P04350 [242-252]; Q9BUF5 [242-252]; P07437 [242-252]; P68371 [242-252]; Q9BVA1 [242-252]		1	1276.71								1946	Redundant	Heavy	Peak Found	High	High	1.17	0.001344	0.012	2.2	28.05
	TRUE	High	[K].GHYTEGAELVDSVLDVVR.[K]	1xLabel:13C(6)15N(4) [R18]	7.18736e-06	9.1126e-05	3	5	1	P07437; P68371; Q9BVA1	P07437 [104-121]; P68371 [104-121]; Q9BVA1 [104-121]		0	1968.99	1.539	0.100543	0	78.8	121.2	217735	278749	2217	Shared	Heavy	Peak Found	High	High	-0.22	0.0001192	3.583e-06	3.67	72.65
	TRUE	High	[K].GHYTEGAELVDSVLDVVRK.[E]		3.77354e-05	9.1126e-05	3	5	1	P07437; P68371; Q9BVA1	P07437 [104-122]; P68371 [104-122]; Q9BVA1 [104-122]		1	2087.08	1.15	0.602312	0	93	107	501015	479324	2218	Shared	Light	High	Peak Found	High	0.92	0.0001192	2.007e-05	3.72	68.28
	TRUE	High	[K].GHYTEGAELVDSVLDVVRK.[E]	1xLabel:13C(6)15N(2) [K19]; 1xLabel:13C(6)15N(4) [R18]	0.0299897	0.00196171	3	5	2	P07437; P68371; Q9BVA1	P07437 [104-122]; P68371 [104-122]; Q9BVA1 [104-122]		1	2105.1								2218	Redundant	Heavy	Peak Found	High	High	1.39	0.001771	0.02091	2.87	68.28
	TRUE	High	[K].LAVNMVPFPR.[L]		7.95777e-06	9.1126e-05	5	10	2	P04350; Q9BUF5; P07437; P68371; Q9BVA1	P04350 [253-262]; Q9BUF5 [253-262]; P07437 [253-262]; P68371 [253-262]; Q9BVA1 [253-262]		0	1143.63	0.924	0.478691	0	104	96	34044256	26167404	2903	Shared	Light	High	Peak Found	High	-0.1	0.0001192	3.967e-06	3.73	54.03
	TRUE	High	[K].LAVNMVPFPR.[L]	1xLabel:13C(6)15N(4) [R10]	9.82642e-06	9.1126e-05	5	10	2	P04350; Q9BUF5; P07437; P68371; Q9BVA1	P04350 [253-262]; Q9BUF5 [253-262]; P07437 [253-262]; P68371 [253-262]; Q9BVA1 [253-262]		0	1153.64								2903	Redundant	Heavy	Peak Found	High	High	0.04	0.0001192	4.966e-06	3.61	54.03
	TRUE	High	[K].LAVNMVPFPR.[L]	1xOxidation [M5]	1.31445e-05	9.1126e-05	5	10	2	P04350; Q9BUF5; P07437; P68371; Q9BVA1	P04350 [253-262]; Q9BUF5 [253-262]; P07437 [253-262]; P68371 [253-262]; Q9BVA1 [253-262]		0	1159.63								2904	Redundant	Light	High	Peak Found	High	0.43	0.0001192	6.684e-06	3.49	43.93
	TRUE	High	[K].LAVNMVPFPR.[L]	1xOxidation [M5]; 1xLabel:13C(6)15N(4) [R10]	3.07829e-05	9.1126e-05	5	10	2	P04350; Q9BUF5; P07437; P68371; Q9BVA1	P04350 [253-262]; Q9BUF5 [253-262]; P07437 [253-262]; P68371 [253-262]; Q9BVA1 [253-262]		0	1169.64	0.978	0.691914	0	101.1	98.9	25273520	20572971	2904	Shared	Heavy	Peak Found	High	High	-0.27	0.0001192	1.629e-05	3.23	43.93
	TRUE	High	[R].LHFFMPGFAPLTSR.[G]		9.8679e-07	9.1126e-05	5	8	4	P04350; Q9BUF5; P07437; P68371; Q9BVA1	P04350 [263-276]; Q9BUF5 [263-276]; P07437 [263-276]; P68371 [263-276]; Q9BVA1 [263-276]		0	1620.84								3232	Redundant	Light	High	Peak Found	High	0.2	0.0001192	4.512e-07	4.2	70.68
	TRUE	High	[R].LHFFMPGFAPLTSR.[G]	1xLabel:13C(6)15N(4) [R14]	5.53164e-06	9.1126e-05	5	8	3	P04350; Q9BUF5; P07437; P68371; Q9BVA1	P04350 [263-276]; Q9BUF5 [263-276]; P07437 [263-276]; P68371 [263-276]; Q9BVA1 [263-276]		0	1630.84	1.065	0.843389	0	96.9	103.1	2.55908e+06	2.267e+06	3232	Shared	Heavy	Peak Found	High	High	0.26	0.0001192	2.723e-06	4.16	70.68
	TRUE	High	[R].LHFFMPGFAPLTSR.[G]	1xOxidation [M5]	2.67287e-06	9.1126e-05	5	8	2	P04350; Q9BUF5; P07437; P68371; Q9BVA1	P04350 [263-276]; Q9BUF5 [263-276]; P07437 [263-276]; P68371 [263-276]; Q9BVA1 [263-276]		0	1636.83	0.931	0.545837	0	103.6	96.4	7.26984e+06	5.63018e+06	3233	Shared	Light	High	Peak Found	High	0.18	0.0001192	1.274e-06	3.43	61.46
	TRUE	High	[R].LHFFMPGFAPLTSR.[G]	1xOxidation [M5]; 1xLabel:13C(6)15N(4) [R14]	2.30125e-05	9.1126e-05	5	8	5	P04350; Q9BUF5; P07437; P68371; Q9BVA1	P04350 [263-276]; Q9BUF5 [263-276]; P07437 [263-276]; P68371 [263-276]; Q9BVA1 [263-276]		0	1646.84								3233	Redundant	Heavy	Peak Found	High	High	0.34	0.0001192	1.199e-05	3.05	61.46
	TRUE	High	[R].IMNTFSVVPSPK.[V]		1.88519e-06	9.1126e-05	3	4	3	P04350; P07437; P68371	P04350 [163-174]; P07437 [163-174]; P68371 [163-174]		0	1319.7	0.963	0.628037	0	101.9	98.1	46817812	37497300	3523	Shared	Light	High	Peak Found	High	0.41	0.0001192	8.845e-07	3.62	45.09
	TRUE	High	[R].IMNTFSVVPSPK.[V]	1xLabel:13C(6)15N(2) [K12]	2.41409e-06	9.1126e-05	3	4	2	P04350; P07437; P68371	P04350 [163-174]; P07437 [163-174]; P68371 [163-174]		0	1327.72								3523	Redundant	Heavy	Peak Found	High	High	0.66	0.0001192	1.148e-06	4.04	45.09
	TRUE	High	[R].IMNTFSVVPSPK.[V]	1xOxidation [M2]	6.15041e-07	9.1126e-05	3	4	3	P04350; P07437; P68371	P04350 [163-174]; P07437 [163-174]; P68371 [163-174]		0	1335.7	0.95	0.579898	0	102.5	97.5	2.86897e+07	2.26884e+07	3524	Shared	Light	High	Peak Found	High	0.56	0.0001192	2.752e-07	3.61	37.76
	TRUE	High	[R].IMNTFSVVPSPK.[V]	1xOxidation [M2]; 1xLabel:13C(6)15N(2) [K12]	4.61195e-06	9.1126e-05	3	4	4	P04350; P07437; P68371	P04350 [163-174]; P07437 [163-174]; P68371 [163-174]		0	1343.71								3524	Redundant	Heavy	Peak Found	High	High	0.53	0.0001192	2.251e-06	4.06	37.76
	TRUE	High	[R].INVYYNEATGGK.[Y]		6.06159e-07	9.1126e-05	1	1	2	P68371	P68371 [47-58]		0	1328.65	1.026	0.891142	0	98.7	101.3	14059088	12003076	3578		Light	High	Peak Found	High	0.05	0.0001192	2.726e-07	3.5	26.9
	TRUE	High	[R].INVYYNEATGGK.[Y]	1xLabel:13C(6)15N(2) [K12]	1.04151e-05	9.1126e-05	1	1	1	P68371	P68371 [47-58]		0	1336.66								3578	Redundant	Heavy	Peak Found	High	High	-0.25	0.0001192	5.265e-06	3.37	26.9
	TRUE	High	[R].INVYYNEATGGKYVPR.[A]	1xLabel:13C(6)15N(2) [K12]; 1xLabel:13C(6)15N(4) [R16]	0.000437352	9.1126e-05	1	1	1	P68371	P68371 [47-62]		1	1861.96	0.89	0.408048	0	105.8	94.2	7.35138e+06	5441891	3579		Heavy	Peak Found	High	High	-0.27	0.0001192	0.0002582	2.46	36.2
	TRUE	High	[R].ISEQFTAMFR.[R]		0.00479458	0.000596234	4	6	1	P04350; P07437; P68371; Q9BVA1	P04350 [381-390]; P07437 [381-390]; P68371 [381-390]; Q9BVA1 [381-390]		0	1229.6	0.01	1e-17		200		1074696		3757	Shared	Light	High	Not Found	High	2.32	0.0005035	0.003103	3.2	53.13
	TRUE	High	[R].ISEQFTAMFR.[R]	1xOxidation [M8]	0.0568386	0.00387987	4	6	1	P04350; P07437; P68371; Q9BVA1	P04350 [381-390]; P07437 [381-390]; P68371 [381-390]; Q9BVA1 [381-390]		0	1245.59	1.252	0.494635	0	88.8	111.2	1.46297e+06	1.52385e+06	3758	Shared	Light	High	Peak Found	High	0.81	0.003217	0.04102	2.24	39.68
	TRUE	High	[K].NSSYFVEWIPNNVK.[TV]		3.91796e-07	9.1126e-05	5	7	4	P04350; Q9BUF5; P07437; P68371; Q9BVA1	P04350 [337-350]; Q9BUF5 [337-350]; P07437 [337-350]; P68371 [337-350]; Q9BVA1 [337-350]		0	1696.83	1.003	0.795889	0	99.8	100.2	2.12191e+07	1.77149e+07	4842	Shared	Light	High	Peak Found	High	-0.41	0.0001192	1.723e-07	4	63.47
	TRUE	High	[K].NSSYFVEWIPNNVK.[TV]	1xLabel:13C(6)15N(2) [K14]	1.1413e-06	9.1126e-05	5	7	2	P04350; Q9BUF5; P07437; P68371; Q9BVA1	P04350 [337-350]; Q9BUF5 [337-350]; P07437 [337-350]; P68371 [337-350]; Q9BVA1 [337-350]		0	1704.85								4842	Redundant	Heavy	Peak Found	High	High	-0.07	0.0001192	5.258e-07	3.56	63.47
	TRUE	High	[R].SGPFGQIFRPDNFVFGQSGAGNNWAK.[G]		2.90207e-10	9.1126e-05	4	5	2	P04350; P07437; P68371; Q9BVA1	P04350 [78-103]; P07437 [78-103]; P68371 [78-103]; Q9BVA1 [78-103]		0	2798.34								5457	Redundant	Light	High	Peak Found	High	-0.15	0.0001192	9.448e-11	6.39	72.29
	TRUE	High	[R].SGPFGQIFRPDNFVFGQSGAGNNWAK.[G]	1xLabel:13C(6)15N(2) [K26]; 1xLabel:13C(6)15N(4) [R9]	4.99209e-11	9.1126e-05	4	5	2	P04350; P07437; P68371; Q9BVA1	P04350 [78-103]; P07437 [78-103]; P68371 [78-103]; Q9BVA1 [78-103]		0	2816.37	0.863	0.61459	0	107.4	92.6	609997	437890	5457	Shared	Heavy	Peak Found	High	High	-0.52	0.0001192	1.51e-11	5.8	72.29
	TRUE	High	[R].YLTVAAVFR.[G]		0.000638035	9.1126e-05	3	3	2	P04350; P07437; P68371	P04350 [310-318]; P07437 [310-318]; P68371 [310-318]		0	1039.59	1.216	0.453005	0	90.2	109.8	4062615	4.1119e+06	7210	Shared	Light	High	Peak Found	High	-0.25	0.0001192	0.0003821	1.97	54.26
	TRUE	High	[R].YLTVAAVFR.[G]	1xLabel:13C(6)15N(4) [R9]	0.0022184	0.000224419	3	3	2	P04350; P07437; P68371	P04350 [310-318]; P07437 [310-318]; P68371 [310-318]		0	1049.6								7210	Redundant	Heavy	Peak Found	High	High	-0.55	0.0002185	0.001404	2.14	54.26
TRUE	High	Master Protein	P49006	MARCKS-related protein OS=Homo sapiens OX=9606 GN=MARCKSL1 PE=1 SV=2	0	242.048	73	7	63	7	195	19.5	4.67	336.81	7	Pf02063	65108	ENSG00000175130	MARCKSL1	D3DPQ0; hsa:65108; P49006; Q5TEE6; Q6NXS5			Fc gamma R-mediated phagocytosis; Leishmaniasis	2	0	0.508	3.79092e-05	47.08	135.3	64.7	1.4846e+08	5.9128e+07	High	High	1
	Checked	Confidence	Annotated Sequence	Modifications	Qvality PEP	Qvality q-value	# Protein Groups	# Proteins	# PSMs	Master Protein Accessions	Positions in Master Proteins	Modifications in Master Proteins	# Missed Cleavages	Theo. MH+ [Da]	Abundance Ratio: (Heavy) / (Light)	Abundance Ratio P-Value: (Heavy) / (Light)	Abundance Ratio Variability [%]: (Heavy) / (Light)	Abundances (Grouped): Light	Abundances (Grouped): Heavy	Abundance: F2: Light, Sample	Abundance: F2: Heavy, Sample	Precursor Quan Result ID	Quan Info	Quan Channel	Found in Sample: [S2] F2: Light, Sample	Found in Sample: [S4] F2: Heavy, Sample	Confidence (by Search Engine): Sequest HT	DeltaM [ppm] (by Search Engine): Sequest HT	Percolator q-Value (by Search Engine): Sequest HT	Percolator PEP (by Search Engine): Sequest HT	XCorr (by Search Engine): Sequest HT	Top Apex RT [min]
	TRUE	High	[K].APRGDVTAEEAAGASPAKANGQENGHVK.[S]		0.0111525	0.00122778	1	1	2	P49006	P49006 [8-35]		2	2732.33	0.508	0.0113159	0	132.6	67.4	1.52287e+06	643884	521		Light	High	Peak Found	High	-1.15	0.001157	0.007464	3.46	14.12
	TRUE	High	[K].APRGDVTAEEAAGASPAKANGQENGHVK.[S]	2xLabel:13C(6)15N(2) [K18; K28]; 1xLabel:13C(6)15N(4) [R3]	0.000234104	9.1126e-05	1	1	2	P49006	P49006 [8-35]		2	2758.37								521	Redundant	Heavy	Peak Found	High	High	-0.26	0.0001192	0.0001353	4.28	14.12
	TRUE	High	[K].EGGGDSSASSPTEEEQEQGEIGACSDEGTAQEGK.[A]	1xCarbamidomethyl [C24]	3.79824e-10	9.1126e-05	1	1	2	P49006	P49006 [111-144]		0	3413.37	100	1e-17			200		2.56589e+06	1466		Light	High	Peak Found	High	0.29	0.0001192	1.253e-10	6.98	27.22
	TRUE	High	[K].EGGGDSSASSPTEEEQEQGEIGACSDEGTAQEGK.[A]	1xCarbamidomethyl [C24]; 1xLabel:13C(6)15N(2) [K34]	8.97761e-07	9.1126e-05	1	1	1	P49006	P49006 [111-144]		0	3421.38								1466	Redundant	Heavy	Not Found	High	High	2.2	0.0001192	4.086e-07	6.39	27.22
	TRUE	High	[K].EGGGDSSASSPTEEEQEQGEIGACSDEGTAQEGK.[A]	1xCarbamidomethyl [C24]; 1xDeamidated [Q18]; 1xLabel:13C(6)15N(2) [K34]	1.58807e-05	9.1126e-05	1	1	1	P49006	P49006 [111-144]		0	3422.37								1467	Redundant	Heavy	Peak Found	High	High	3.16	0.0001192	8.177e-06	5.85	26.35
	TRUE	High	[K].GAEASAASEEEAGPQATEPSTPSGPESGPTPASAEQNE.[-]		4.27529e-07	9.1126e-05	1	1	4	P49006	P49006 [158-195]		0	3625.55									Indistinguishable Channels		Not Found	Not Found	High	1.01	0.0001192	1.889e-07	6.13	36.59
	TRUE	High	[R].GDVTAEEAAGASPAKANGQENGHVK.[S]		6.38542e-09	9.1126e-05	1	1	2	P49006	P49006 [11-35]		1	2408.14								2092	Redundant	Light	High	Peak Found	High	0.58	0.0001192	2.358e-09	5.3	14.08
	TRUE	High	[R].GDVTAEEAAGASPAKANGQENGHVK.[S]	1xDeamidated [N/Q]	1.30242e-08	9.1126e-05	1	1	4	P49006	P49006 [11-35]		1	2409.13	0.531	0.00563388	0	130.6	69.4	3.72173e+06	1.64578e+06	2091		Light	High	Peak Found	High	0.65	0.0001192	4.973e-09	5.96	15.1
	TRUE	High	[R].GDVTAEEAAGASPAKANGQENGHVK.[S]	2xLabel:13C(6)15N(2) [K15; K25]	6.44448e-06	9.1126e-05	1	1	2	P49006	P49006 [11-35]		1	2424.17	0.807	0.200247	0	110.7	89.3	6.25824e+06	4.20429e+06	2092		Heavy	Peak Found	High	High	-0.33	0.0001192	3.19e-06	3.36	14.08
	TRUE	High	[R].GDVTAEEAAGASPAKANGQENGHVK.[S]	1xDeamidated [N17]; 2xLabel:13C(6)15N(2) [K15; K25]	1.10054e-06	9.1126e-05	1	1	4	P49006	P49006 [11-35]		1	2425.16								2091	Redundant	Heavy	Peak Found	High	High	0.55	0.0001192	5.047e-07	6.04	15.1
	TRUE	High	[K].GEGESPPVNGTDEAAGATGDAIEPAPPSQGAEAK.[G]		2.98774e-10	9.1126e-05	1	1	5	P49006	P49006 [44-77]		0	3177.45								2131	Redundant	Light	High	Peak Found	High	0.16	0.0001192	9.761e-11	7.43	35.7
	TRUE	High	[K].GEGESPPVNGTDEAAGATGDAIEPAPPSQGAEAK.[G]	1xDeamidated [N/Q]	4.11927e-12	9.1126e-05	1	1	7	P49006	P49006 [44-77]		0	3178.43	0.123	1e-17	0	178.1	21.9	4.91508e+06	503647	2130		Light	High	Peak Found	High	3.48	0.0001192	1.122e-12	6.41	37.04
	TRUE	High	[K].GEGESPPVNGTDEAAGATGDAIEPAPPSQGAEAK.[G]	1xLabel:13C(6)15N(2) [K34]	9.05338e-09	9.1126e-05	1	1	2	P49006	P49006 [44-77]		0	3185.46	0.451	3.95277e-06	0	137.9	62.1	129205082	48448568	2131		Heavy	Peak Found	High	High	0.38	0.0001192	3.39e-09	6.87	35.7
	TRUE	High	[K].GEGESPPVNGTDEAAGATGDAIEPAPPSQGAEAK.[G]	1xDeamidated [Q/N]; 1xLabel:13C(6)15N(2) [K34]	8.32222e-08	9.1126e-05	1	1	5	P49006	P49006 [44-77]		0	3186.44								2130	Redundant	Heavy	Peak Found	High	High	4.73	0.0001192	3.43e-08	6.16
	TRUE	High	[R].KEGGGDSSASSPTEEEQEQGEIGACSDEGTAQEGK.[A]	1xCarbamidomethyl [C25]	1.67809e-06	9.1126e-05	1	1	1	P49006	P49006 [110-144]		1	3541.46								2644	Redundant	Light	High	Peak Found	High	-0.51	0.0001192	7.832e-07	5.93	21.58
	TRUE	High	[R].KEGGGDSSASSPTEEEQEQGEIGACSDEGTAQEGK.[A]	1xCarbamidomethyl [C25]; 1xDeamidated [Q17]	0.000202426	9.1126e-05	1	1	1	P49006	P49006 [110-144]		1	3542.45								2645	No Quan Values	Light	High	Not Found	High	4.56	0.0001192	0.0001156	6.01
	TRUE	High	[R].KEGGGDSSASSPTEEEQEQGEIGACSDEGTAQEGK.[A]	1xCarbamidomethyl [C25]; 2xLabel:13C(6)15N(2) [K1; K35]	1.40337e-05	9.1126e-05	1	1	1	P49006	P49006 [110-144]		1	3557.49	0.745	0.268657	0	114.6	85.4	1.16896e+06	724250	2644		Heavy	Peak Found	High	High	-0.32	0.0001192	7.165e-06	5.91	21.58
	TRUE	High	[R].KEGGGDSSASSPTEEEQEQGEIGACSDEGTAQEGK.[A]	1xCarbamidomethyl [C25]; 1xDeamidated [Q17]; 2xLabel:13C(6)15N(2) [K1; K35]	2.36918e-05	9.1126e-05	1	1	1	P49006	P49006 [110-144]		1	3558.48								2645	Redundant	Heavy	Not Found	High	High	1.53	0.0001192	1.239e-05	6.79
	TRUE	High	[R].KEGGGDSSASSPTEEEQEQGEIGACSDEGTAQEGK.[A]	1xCarbamidomethyl [C25]; 2xDeamidated [Q17; Q19]; 2xLabel:13C(6)15N(2) [K1; K35]	1.47667e-05	9.1126e-05	1	1	1	P49006	P49006 [110-144]		1	3559.46								2646	Redundant	Heavy	Not Found	High	High	3.48	0.0001192	7.574e-06	6.23
TRUE	High	Master Protein	P21333	Filamin-A OS=Homo sapiens OX=9606 GN=FLNA PE=1 SV=4	0	241.458	18	28	59	27	2647	280.6	6.06	197.22	28	Pf00307, Pf00630	2316	ENSG00000196924	FLNA	E9KL45; hsa:2316; P21333; Q5HY53; Q5HY55; Q8NF52	Androgen receptor signaling pathway; Prolactin signaling pathway; Focal adhesion; Hypothesized pathways in pathogenesis of cardiovascular disease; MAPK signaling pathway; IL-4 signaling pathway; Ebola virus pathway in host; Joubert syndrome	RHO GTPases activate PAKs; Platelet degranulation ; OAS antiviral response; GP1b-IX-V activation signalling; Cell-extracellular matrix interactions	MAPK signaling pathway; Focal adhesion; Salmonella infection; Proteoglycans in cancer	17	1	0.646	0.00651137	21.73	120.5	79.5	8.95247e+07	4.90984e+07	High	High	1
	Checked	Confidence	Annotated Sequence	Modifications	Qvality PEP	Qvality q-value	# Protein Groups	# Proteins	# PSMs	Master Protein Accessions	Positions in Master Proteins	Modifications in Master Proteins	# Missed Cleavages	Theo. MH+ [Da]	Abundance Ratio: (Heavy) / (Light)	Abundance Ratio P-Value: (Heavy) / (Light)	Abundance Ratio Variability [%]: (Heavy) / (Light)	Abundances (Grouped): Light	Abundances (Grouped): Heavy	Abundance: F2: Light, Sample	Abundance: F2: Heavy, Sample	Precursor Quan Result ID	Quan Info	Quan Channel	Found in Sample: [S2] F2: Light, Sample	Found in Sample: [S4] F2: Heavy, Sample	Confidence (by Search Engine): Sequest HT	DeltaM [ppm] (by Search Engine): Sequest HT	Percolator q-Value (by Search Engine): Sequest HT	Percolator PEP (by Search Engine): Sequest HT	XCorr (by Search Engine): Sequest HT	Top Apex RT [min]
	TRUE	High	[R].AEAGVPAEFSIWTR.[E]		0.00351941	0.000477939	1	1	1	P21333	P21333 [2251-2264]		0	1533.77								127	Redundant	Light	High	Peak Found	High	2.76	0.0004125	0.002267	2.06	61.9
	TRUE	High	[R].AEAGVPAEFSIWTR.[E]	1xLabel:13C(6)15N(4) [R14]	6.37029e-05	9.1126e-05	1	1	1	P21333	P21333 [2251-2264]		0	1543.78	0.608	0.0335029	0	124.4	75.6	2.02124e+06	1.02313e+06	127		Heavy	Peak Found	High	High	0	0.0001192	3.483e-05	2.76	61.9
	TRUE	High	[K].AFGPGLQGGSAGSPAR.[F]		1.36889e-06	9.1126e-05	1	1	1	P21333	P21333 [1072-1087]		0	1429.72	0.663	0.0229779	0	120.3	79.7	7502734	4.13922e+06	180		Light	High	Peak Found	High	-0.08	0.0001192	6.368e-07	2.69	25.75
	TRUE	High	[K].AFGPGLQGGSAGSPAR.[F]	1xLabel:13C(6)15N(4) [R16]	1.93266e-05	9.1126e-05	1	1	1	P21333	P21333 [1072-1087]		0	1439.73								180	Redundant	Heavy	Peak Found	High	High	0.37	0.0001192	1.004e-05	3.74	25.75
	TRUE	High	[R].ANLPQSFQVDTSK.[A]	1xLabel:13C(6)15N(2) [K13]	0.000208399	9.1126e-05	1	1	1	P21333	P21333 [1465-1477]		0	1442.74	0.797	0.131411	0	111.3	88.7	14511593	9628687	473		Heavy	Peak Found	High	High	-0.5	0.0001192	0.0001195	2.93	34.01
	TRUE	High	[R].AYGPGIEPTGNMVK.[K]		0.00344421	0.000477939	1	1	1	P21333	P21333 [286-299]		0	1433.71	0.619	0.034948	0	123.5	76.5	3614844	1.86188e+06	731		Light	High	Peak Found	High	0.43	0.0004125	0.00221	2.94	33.46
	TRUE	High	[R].AYGPGIEPTGNMVK.[K]	1xOxidation [M12]	0.0142034	0.00130832	1	1	1	P21333	P21333 [286-299]		0	1449.7	0.692	0.0590355	0	118.2	81.8	2.20171e+06	1.2682e+06	732		Light	High	Peak Found	High	0.33	0.001212	0.009561	2.6	24.69
	TRUE	High	[K].DAGEGGLSLAIEGPSK.[A]	1xLabel:13C(6)15N(2) [K16]	3.2766e-06	9.1126e-05	1	1	1	P21333	P21333 [1892-1907]		0	1508.77								759	No Quan Values	Heavy	Not Found	High	High	-1.74	0.0001192	1.58e-06	3.1
	TRUE	High	[K].DLAEDAPWKK.[I]		0.0398627	0.0026405	2	3	1	P21333; O75369	P21333 [34-43]; O75369 [7-16]		1	1172.59	0.849	0.447243	0	108.2	91.8	3204526	2263772	942	Shared	Light	High	Peak Found	High	-0.26	0.002359	0.02823	2.26	29.24
	TRUE	High	[R].DVDIIDHHDNTYTVK.[Y]		0.0231372	0.00166208	1	1	1	P21333	P21333 [922-936]		0	1784.84	0.867	0.341324	0	107.1	92.9	5078698	3662103	1177		Light	High	Peak Found	High	0.51	0.001494	0.01596	2.26	29.94
	TRUE	High	[R].DVDIIDHHDNTYTVK.[Y]	1xLabel:13C(6)15N(2) [K15]	0.00780542	0.000914196	1	1	1	P21333	P21333 [922-936]		0	1792.86								1177	Redundant	Heavy	Peak Found	High	High	1.1	0.0008339	0.005176	2.82	29.94
	TRUE	High	[R].EAGAGGLAIAVEGPSK.[A]		1.1872e-05	9.1126e-05	1	1	1	P21333	P21333 [2265-2280]		0	1426.75								1259	No Quan Values	Light	High	Not Found	High	-1.07	0.0001192	6.033e-06	3.33
	TRUE	High	[R].EAGAGGLAIAVEGPSK.[A]	1xLabel:13C(6)15N(2) [K16]	5.86306e-06	9.1126e-05	1	1	1	P21333	P21333 [2265-2280]		0	1434.77								1259	Redundant	Heavy	Not Found	High	High	0.96	0.0001192	2.901e-06	2.75
	TRUE	High	[R].EATTEFSVDAR.[A]		0.00362222	0.000477939	1	1	1	P21333	P21333 [1273-1283]		0	1225.57	1.375	0.232302	0	84.2	115.8	1291125	1.47745e+06	1300		Light	High	Peak Found	High	1.13	0.0004125	0.002337	2.28	25.06
	TRUE	High	[R].EGPYSISVLYGDEEVPR.[S]		1.96929e-06	9.1126e-05	1	1	1	P21333	P21333 [1516-1532]		0	1909.92	0.7	0.118156	0	117.6	82.4	1912752	1.11494e+06	1487		Light	High	Peak Found	High	-1.76	0.0001192	9.28e-07	4.92	58.92
	TRUE	High	[R].EGPYSISVLYGDEEVPR.[S]	1xLabel:13C(6)15N(4) [R17]	2.58827e-07	9.1126e-05	1	1	1	P21333	P21333 [1516-1532]		0	1919.93								1487	Redundant	Heavy	Peak Found	High	High	0.94	0.0001192	1.117e-07	4.19	58.92
	TRUE	High	[R].FGGEHVPNSPFQVTALAGDQPSVQPPLR.[S]		0.0266267	0.00166208	1	1	1	P21333	P21333 [1726-1753]		0	2945.49								1882	No Quan Values	Light	High	Not Found	High	3.63	0.001546	0.01843	2.96
	TRUE	High	[K].FNEEHIPDSPFVVPVASPSGDAR.[R]	1xLabel:13C(6)15N(4) [R23]	0.000289036	9.1126e-05	1	1	1	P21333	P21333 [2311-2333]		0	2477.2	0.19	8.50278e-11	0	168	32	2.22548e+06	352313	1939		Heavy	Peak Found	High	High	0.95	0.0001192	0.0001681	2.66	57.92
	TRUE	High	[K].GLVEPVDVVDNADGTQTVNYVPSR.[E]		1.26507e-08	9.1126e-05	1	1	2	P21333	P21333 [1492-1515]		0	2544.26	0.577	0.00673458	0	126.8	73.2	4751675	2.2821e+06	2314		Light	High	Peak Found	High	1.79	0.0001192	4.808e-09	5.87	56.18
	TRUE	High	[K].GLVEPVDVVDNADGTQTVNYVPSR.[E]	1xLabel:13C(6)15N(4) [R24]	8.27671e-05	9.1126e-05	1	1	2	P21333	P21333 [1492-1515]		0	2554.27								2314	Redundant	Heavy	Peak Found	High	High	-0.3	0.0001192	4.549e-05	5.02	56.18
	TRUE	High	[K].NGQHVASSPIPVVISQSEIGDASR.[V]	1xLabel:13C(6)15N(4) [R24]	3.39795e-06	9.1126e-05	1	1	1	P21333	P21333 [2026-2049]		0	2458.26	0.543	0.0101564	0	129.6	70.4	2.02587e+06	915158	4685		Heavy	Peak Found	High	High	-0.4	0.0001192	1.639e-06	3.39	49.06
	TRUE	High	[R].SAGQGEVLVYVEDPAGHQEEAK.[V]		0.000781826	9.1126e-05	1	1	1	P21333	P21333 [310-331]		0	2313.1								5292	Redundant	Light	High	Peak Found	High	-1.59	0.0001192	0.000474	3.56	40.94
	TRUE	High	[R].SAGQGEVLVYVEDPAGHQEEAK.[V]	1xLabel:13C(6)15N(2) [K22]	3.45817e-05	9.1126e-05	1	1	1	P21333	P21333 [310-331]		0	2321.11	0.511	0.00164908	0	132.3	67.7	2610684	1.11105e+06	5292		Heavy	Peak Found	High	High	-0.1	0.0001192	1.837e-05	3.54	41.13
	TRUE	High	[K].SPFEVYVDK.[S]		0.127663	0.00894957	1	1	1	P21333	P21333 [368-376]		0	1083.54								5636	No Quan Values	Light	High	Not Found	High	-0.72	0.007318	0.09728	2.08
	TRUE	High	[K].SPFSVAVSPSLDLSK.[I]		0.000397936	9.1126e-05	1	1	1	P21333	P21333 [959-973]		0	1533.82	0.79	0.280444	0	111.7	88.3	2.88068e+06	1894365	5639		Light	High	Peak Found	High	0.14	0.0001192	0.0002343	3.13	57.04
	TRUE	High	[K].SPFSVAVSPSLDLSK.[I]	1xLabel:13C(6)15N(2) [K15]	9.9993e-05	9.1126e-05	1	1	1	P21333	P21333 [959-973]		0	1541.83								5639	Redundant	Heavy	Peak Found	High	High	1.87	0.0001192	5.574e-05	3.24	57.04
	TRUE	High	[K].TGVAVNKPAEFTVDAK.[H]		8.0981e-05	9.1126e-05	1	1	2	P21333	P21333 [685-700]		0	1646.87								6036	Redundant	Light	High	Peak Found	High	-0.43	0.0001192	4.463e-05	3.03	28.83
	TRUE	High	[K].TGVAVNKPAEFTVDAK.[H]	2xLabel:13C(6)15N(2) [K7; K16]	3.58624e-05	9.1126e-05	1	1	2	P21333	P21333 [685-700]		0	1662.9	0.488	0.000140985	0	134.4	65.6	9087773	3.68702e+06	6036		Heavy	Peak Found	High	High	-0.79	0.0001192	1.912e-05	3.09	28.83
	TRUE	High	[R].VANPSGNLTETYVQDR.[G]	1xLabel:13C(6)15N(4) [R16]	1.79916e-07	9.1126e-05	1	1	1	P21333	P21333 [1297-1312]		0	1773.86								6404	Redundant	Heavy	Peak Found	High	High	1.32	0.0001192	7.668e-08	4.46	33.11
	TRUE	High	[K].VAQPTITDNKDGTVTVR.[Y]		0.00203417	0.000224419	1	1	1	P21333	P21333 [1815-1831]		1	1814.96								6413	No Quan Values	Light	High	Not Found	High	-1.4	0.0002185	0.001284	3.33
	TRUE	High	[R].VHGPGIQSGTTNKPNKFTVETR.[G]	2xLabel:13C(6)15N(2) [K13; K16]; 1xLabel:13C(6)15N(4) [R22]	0.00652668	0.000694413	1	1	1	P21333	P21333 [1360-1381]		1	2394.27	0.613	0.0341044	0	124	76	3.47721e+06	1.77473e+06	6613		Heavy	Peak Found	High	High	-0.01	0.0005813	0.004273	2.38	19.51
	TRUE	High	[K].VNQPASFAVSLNGAK.[G]	1xLabel:13C(6)15N(2) [K15]	0.00383686	0.000477939	1	1	1	P21333	P21333 [2347-2361]		0	1510.81	0.561	0.0259218	0	128.1	71.9	1.619e+06	755857	6842		Heavy	Peak Found	High	High	-0.88	0.0004125	0.002465	2.21	39.95
	TRUE	High	[K].VTAQGPGLEPSGNIANK.[T]		5.63636e-07	9.1126e-05	1	1	1	P21333	P21333 [384-400]		0	1652.86								6928	Redundant	Light	High	Peak Found	High	0.68	0.0001192	2.529e-07	4.29	25.59
	TRUE	High	[K].VTAQGPGLEPSGNIANK.[T]	1xLabel:13C(6)15N(2) [K17]	2.19629e-06	9.1126e-05	1	1	1	P21333	P21333 [384-400]		0	1660.87	0.564	0.0023182	0	127.9	72.1	5.77845e+06	2.70959e+06	6928		Heavy	Peak Found	High	High	0.51	0.0001192	1.044e-06	4.64	25.59
	TRUE	High	[K].VTVLFAGQHIAK.[S]		0.0432934	0.00273013	1	1	1	P21333	P21333 [356-367]		0	1283.75								6954	No Quan Values	Light	High	Not Found	High	0.29	0.002423	0.03081	1.63
	TRUE	High	[K].YGGDEIPFSPYR.[V]		0.00616311	0.000694413	1	1	1	P21333	P21333 [1622-1633]		0	1400.65	0.661	0.0676611	0	120.4	79.6	3452362	1.89882e+06	7153		Light	High	Peak Found	High	-0.36	0.0005813	0.004027	2.8	49.48
	TRUE	High	[K].YGGDEIPFSPYR.[V]	1xLabel:13C(6)15N(4) [R12]	0.00557452	0.000694413	1	1	1	P21333	P21333 [1622-1633]		0	1410.66								7153	Redundant	Heavy	Peak Found	High	High	0.19	0.0005813	0.003632	3.04	49.48
	TRUE	High	[K].YNEQHVPGSPFTAR.[V]		0.00881365	0.000914196	1	1	1	P21333	P21333 [1938-1951]		0	1602.77								7214	Redundant	Light	High	Peak Found	High	-0.82	0.0008339	0.005866	2.29	27.3
	TRUE	High	[K].YNEQHVPGSPFTAR.[V]	1xLabel:13C(6)15N(4) [R14]	0.00753124	0.000812034	1	1	1	P21333	P21333 [1938-1951]		0	1612.77	0.646	0.0318224	0	121.5	78.5	2.72598e+06	1.46562e+06	7214		Heavy	Peak Found	High	High	-0.52	0.0007607	0.004956	2.84	27.3
	TRUE	High	[K].YTPVQQGPVGVNVTYGGDPIPK.[S]		3.43718e-07	9.1126e-05	1	1	2	P21333	P21333 [937-958]		0	2286.18								7269	Redundant	Light	High	Not Found	High	2.5	0.0001192	1.503e-07	3.87	51.17
	TRUE	High	[K].YTPVQQGPVGVNVTYGGDPIPK.[S]	1xLabel:13C(6)15N(2) [K22]	1.03515e-07	9.1126e-05	1	1	1	P21333	P21333 [937-958]		0	2294.19	0.01	1e-17		200		1919077		7269		Heavy	Peak Found	High	High	-1.99	0.0001192	4.301e-08	3.95	51.17
TRUE	High	Master Protein	P35579	Myosin-9 OS=Homo sapiens OX=9606 GN=MYH9 PE=1 SV=4	0	239.72	17	23	57	21	1960	226.4	5.6	211.51	23	Pf00063, Pf01576, Pf02736	4627	ENSG00000100345	MYH9	A8K6E4; hsa:4627; O60805; P35579; Q60FE2; Q86T83	Primary focal segmental glomerulosclerosis (FSGS); VEGFA-VEGFR2 signaling pathway; Nephrotic syndrome	Regulation of actin dynamics for phagocytic cup formation; FCGR3A-mediated phagocytosis; EPHA-mediated growth cone collapse; Signaling by ALK fusions and activated point mutants; Sensory processing of sound by inner hair cells of the cochlea; Sensory processing of sound by outer hair cells of the cochlea; Translocation of SLC2A4 (GLUT4) to the plasma membrane; RHO GTPases activate CIT; Sema4D ind…	Vascular smooth muscle contraction; Tight junction; Regulation of actin cytoskeleton; Pathogenic Escherichia coli infection	20	3	0.877	0.347323	17.47	106.7	93.3	4.30334e+07	3.13002e+07	High	High	1	Met-loss+Acetyl [N-Term]
	Checked	Confidence	Annotated Sequence	Modifications	Qvality PEP	Qvality q-value	# Protein Groups	# Proteins	# PSMs	Master Protein Accessions	Positions in Master Proteins	Modifications in Master Proteins	# Missed Cleavages	Theo. MH+ [Da]	Abundance Ratio: (Heavy) / (Light)	Abundance Ratio P-Value: (Heavy) / (Light)	Abundance Ratio Variability [%]: (Heavy) / (Light)	Abundances (Grouped): Light	Abundances (Grouped): Heavy	Abundance: F2: Light, Sample	Abundance: F2: Heavy, Sample	Precursor Quan Result ID	Quan Info	Quan Channel	Found in Sample: [S2] F2: Light, Sample	Found in Sample: [S4] F2: Heavy, Sample	Confidence (by Search Engine): Sequest HT	DeltaM [ppm] (by Search Engine): Sequest HT	Percolator q-Value (by Search Engine): Sequest HT	Percolator PEP (by Search Engine): Sequest HT	XCorr (by Search Engine): Sequest HT	Top Apex RT [min]
	TRUE	High	[K].ALELDSNLYR.[I]		0.00465879	0.000596234	1	1	1	P35579	P35579 [746-755]		0	1193.62	0.985	0.786305	0	100.8	99.2	2.12519e+06	1.74138e+06	322		Light	High	Peak Found	High	0.51	0.0005035	0.003028	3.04	42.11
	TRUE	High	[R].DELADEIANSSGK.[G]		0.00108359	9.1126e-05	1	1	1	P35579	P35579 [1704-1716]		0	1348.62	0.01	1e-17		200		3.55385e+06		832		Light	High	Not Found	High	0.12	0.0001192	0.0006669	3.51	33.93
	TRUE	High	[R].ELEDATETADAMNR.[E]		4.07555e-06	9.1126e-05	1	1	1	P35579	P35579 [1899-1912]		0	1565.67	0.855	0.459673	0	107.8	92.2	2.99815e+06	2133998	1537		Light	High	Peak Found	High	0.26	0.0001192	1.982e-06	3.58	27.35
	TRUE	High	[R].ELEDATETADAMNR.[E]	1xLabel:13C(6)15N(4) [R14]	3.85678e-05	9.1126e-05	1	1	2	P35579	P35579 [1899-1912]		0	1575.68								1537	Redundant	Heavy	Peak Found	High	High	0.14	0.0001192	2.053e-05	3.63	27.35
	TRUE	High	[R].ELESQISELQEDLESER.[A]		0.000395056	9.1126e-05	1	1	1	P35579	P35579 [1108-1124]		0	2033.95								1551	No Quan Values	Light	High	Not Found	High	3.04	0.0001192	0.0002325	3.75
	TRUE	High	[R].IAEFTTNLTEEEEK.[S]		3.1499e-07	9.1126e-05	1	1	1	P35579	P35579 [1001-1014]		0	1653.79								2796	Redundant	Light	High	Peak Found	High	-1.13	0.0001192	1.373e-07	4.15	39.69
	TRUE	High	[R].IAEFTTNLTEEEEK.[S]	1xLabel:13C(6)15N(2) [K14]	1.74556e-05	9.1126e-05	1	1	1	P35579	P35579 [1001-1014]		0	1661.8	0.495	0.0003692	0	133.8	66.2	5750418	2.36827e+06	2796		Heavy	Peak Found	High	High	0.47	0.0001192	9.031e-06	3.07	39.66
	TRUE	High	[R].IAQLEEELEEEQGNTELINDR.[L]		2.58033e-08	9.1126e-05	1	1	2	P35579	P35579 [1731-1751]		0	2472.17	0.771	0.373046	0	113	87	928351	595321	2860		Light	High	Peak Found	High	-2.3	0.0001192	1.013e-08	5.75	57.29
	TRUE	High	[R].IAQLEEELEEEQGNTELINDR.[L]	1xLabel:13C(6)15N(4) [R21]	1.27823e-07	9.1126e-05	1	1	2	P35579	P35579 [1731-1751]		0	2482.18								2860	Redundant	Heavy	Peak Found	High	High	-2.77	0.0001192	5.373e-08	6.62	57.29
	TRUE	High	[K].IAQLEEQLDNETK.[E]		9.61433e-06	9.1126e-05	1	1	2	P35579	P35579 [1816-1828]		0	1530.76	0.863	0.336023	0	107.4	92.6	5796771	4.16192e+06	2861		Light	High	Peak Found	High	-0.24	0.0001192	4.843e-06	3.87	33.8
	TRUE	High	[K].IAQLEEQLDNETK.[E]	1xLabel:13C(6)15N(2) [K13]	1.09591e-05	9.1126e-05	1	1	1	P35579	P35579 [1816-1828]		0	1538.78								2861	Redundant	Heavy	Peak Found	High	High	-0.97	0.0001192	5.544e-06	3.58	33.8
	TRUE	High	[K].LDPHLVLDQLR.[C]		0.000262977	9.1126e-05	2	2	1	P35580; P35579	P35580 [690-700]; P35579 [683-693]		0	1318.75	0.676	0.170588	0	119.3	80.7	1.35124e+06	760313	2952	Shared	Light	High	Peak Found	High	-0.3	0.0001192	0.0001526	1.92	53.52
	TRUE	High	[K].LQVELDNVTGLLSQSDSK.[S]		3.02809e-08	9.1126e-05	1	1	1	P35579	P35579 [1278-1295]		0	1946.01								3702	Redundant	Light	High	Not Found	High	-0.91	0.0001192	1.194e-08	5.22	64.08
	TRUE	High	[K].LQVELDNVTGLLSQSDSK.[S]	1xLabel:13C(6)15N(2) [K18]	1.45702e-07	9.1126e-05	1	1	1	P35579	P35579 [1278-1295]		0	1954.02	0.01	1e-17		200		582129		3702		Heavy	Peak Found	High	High	-0.42	0.0001192	6.156e-08	4.18	64.08
	TRUE	High	[R].LTEMETLQSQLMAEK.[L]	1xLabel:13C(6)15N(2) [K15]	0.00240179	0.000224419	1	1	1	P35579	P35579 [868-882]		0	1759.87	100	1e-17			200		646650	3835		Heavy	Not Found	High	High	0.22	0.0002185	0.001524	2.51	55.97
	TRUE	High	[-].MAQQAADKYLYVDK.[N]	1xMet-loss+Acetyl [N-Term]	0.000535993	9.1126e-05	1	1	1	P35579	P35579 [1-14]	P35579 1xMet-loss+Acetyl [N-Term]	1	1554.78	1.183	0.570977	0	91.6	108.4	1.9565e+06	1.92592e+06	4180		Light	High	Peak Found	High	-0.97	0.0001192	0.0003189	4.06	42.21
	TRUE	High	[K].MQQNIQELEEQLEEEESAR.[Q]		0.120753	0.00868547	1	1	1	P35579	P35579 [941-959]		0	2333.06								4439	No Quan Values	Light	High	Not Found	High	4.92	0.007065	0.09182	2.79
	TRUE	High	[K].MQQNIQELEEQLEEEESAR.[Q]	1xOxidation [M1]; 1xLabel:13C(6)15N(4) [R19]	0.00185172	0.000224419	1	1	1	P35579	P35579 [941-959]		0	2359.06								4440	No Quan Values	Heavy	Not Found	High	High	-1.48	0.0002185	0.001165	3.53
	TRUE	High	[K].NFINNPLAQADWAAK.[K]		3.91329e-05	9.1126e-05	1	1	2	P35579	P35579 [15-29]		0	1672.84	0.779	0.345273	0	112.4	87.6	1.09534e+06	709785	4661		Light	High	Peak Found	High	-0.84	0.0001192	2.09e-05	3.86	60.77
	TRUE	High	[K].NFINNPLAQADWAAK.[K]	1xLabel:13C(6)15N(2) [K15]	6.18765e-05	9.1126e-05	1	1	1	P35579	P35579 [15-29]		0	1680.86								4661	Redundant	Heavy	Peak Found	High	High	0.16	0.0001192	3.374e-05	3.69	60.77
	TRUE	High	[KR].QLLQANPILEAFGNAK.[T]		9.10916e-07	9.1126e-05	1	3	2	P35579	P35579 [210-225]		0	1726.95	0.871	0.456665	0	106.9	93.1	2.45212e+06	1.77627e+06	5039		Light	High	Peak Found	High	0.19	0.0001192	4.17e-07	4.02	70.66
	TRUE	High	[KR].QLLQANPILEAFGNAK.[T]	1xLabel:13C(6)15N(2) [K16]	1.97758e-07	9.1126e-05	1	3	1	P35579	P35579 [210-225]		0	1734.96								5039	Redundant	Heavy	Peak Found	High	High	-0.11	0.0001192	8.457e-08	3.75	70.66
	TRUE	High	[R].RGDLPFVVPR.[R]		0.000192383	9.1126e-05	1	1	1	P35579	P35579 [1923-1932]		1	1155.66	0.858	0.553504	0	107.7	92.3	1.32758e+06	947396	5209		Light	High	Peak Found	High	0.02	0.0001192	0.0001101	2.8	40.93
	TRUE	High	[K].TELEDTLDSTAAQQELR.[S]		8.38297e-08	9.1126e-05	1	1	1	P35579	P35579 [1146-1162]		0	1919.92	1.055	0.988368	0	97.3	102.7	1.81479e+06	1.59288e+06	5965		Light	High	Peak Found	High	-4.15	0.0001192	3.452e-08	3.38	46.25
	TRUE	High	[K].TELEDTLDSTAAQQELR.[S]	1xLabel:13C(6)15N(4) [R17]	4.42503e-10	9.1126e-05	1	1	1	P35579	P35579 [1146-1162]		0	1929.93								5965	Redundant	Heavy	Peak Found	High	High	-2.08	0.0001192	1.462e-10	5.15	46.25
	TRUE	High	[RK].TQLEELEDELQATEDAK.[L]		6.02448e-09	9.1126e-05	2	3	2	P35580; P35579	P35580 [1546-1562]; P35579 [1539-1555]		0	1961.92								6221	Redundant	Light	High	Peak Found	High	-0.42	0.0001192	2.218e-09	5.89	63.36
	TRUE	High	[RK].TQLEELEDELQATEDAK.[L]	1xLabel:13C(6)15N(2) [K17]	0.000143835	9.1126e-05	2	3	2	P35580; P35579	P35580 [1546-1562]; P35579 [1539-1555]		0	1969.93	0.949	0.752855	0	102.6	97.4	1.51904e+06	1.1995e+06	6221	Shared	Heavy	Peak Found	High	High	-2.11	0.0001192	8.111e-05	3.89	63.36
	TRUE	High	[K].VEAQLQELQVK.[F]		0.000386538	9.1126e-05	1	1	1	P35579	P35579 [1250-1260]		0	1284.72	1.065	0.894317	0	96.8	103.2	3.19225e+06	2.82914e+06	6464		Light	High	Peak Found	High	-1.7	0.0001192	0.0002273	2.93	34.16
	TRUE	High	[K].VEAQLQELQVK.[F]	1xLabel:13C(6)15N(2) [K11]	0.000165143	9.1126e-05	1	1	1	P35579	P35579 [1250-1260]		0	1292.73								6464	Redundant	Heavy	Peak Found	High	High	-0.02	0.0001192	9.409e-05	2.98	34.16
	TRUE	High	[K].VKLQEMEGTVK.[S]		0.0255294	0.00166208	1	1	1	P35579	P35579 [1792-1802]		1	1261.68	0.966	0.871692	0	101.7	98.3	685634	550954	6634		Light	High	Peak Found	High	0.16	0.001546	0.01764	2.23	20.93
	TRUE	High	[K].VKLQEMEGTVK.[S]	1xOxidation [M6]	0.0587843	0.00407232	1	1	1	P35579	P35579 [1792-1802]		1	1277.68								6635	No Quan Values	Light	High	Not Found	High	-0.54	0.003434	0.04267	2.18
	TRUE	High	[K].VSHLLGINVTDFTR.[G]		0.00149042	9.1126e-05	1	1	1	P35579	P35579 [374-387]		0	1571.85	1.088	0.885391	0	95.8	104.2	1.74267e+06	1.57791e+06	6910		Light	High	Peak Found	High	-0.84	0.0001192	0.0009279	2.82	57.03
	TRUE	High	[K].VSHLLGINVTDFTR.[G]	1xLabel:13C(6)15N(4) [R14]	0.000346622	9.1126e-05	1	1	2	P35579	P35579 [374-387]		0	1581.86								6910	Redundant	Heavy	Peak Found	High	High	-0.08	0.0001192	0.0002033	3.2	57.03
	TRUE	High	[R].VVFQEFR.[Q]		0.135731	0.0093756	1	1	1	P35579	P35579 [712-718]		0	924.494	0.983	0.868794	0	100.9	99.1	1.49406e+06	1.22214e+06	6964		Light	High	Peak Found	High	-0.28	0.00764	0.1041	1.45	34.69
	TRUE	High	[R].YEILTPNSIPK.[G]		0.0694622	0.00471444	1	1	1	P35579	P35579 [721-731]		0	1274.7	0.664	0.0457094	0	120.2	79.8	2.39465e+06	1.32397e+06	7120		Light	High	Peak Found	High	1.11	0.003841	0.05078	2.16	44.75
TRUE	High	Master Protein	Q14204	Cytoplasmic dynein 1 heavy chain 1 OS=Homo sapiens OX=9606 GN=DYNC1H1 PE=1 SV=5	0	223.67	9	30	63	30	4646	532.1	6.4	210	30	Pf03028, Pf08385, Pf08393, Pf12774, Pf12775, Pf12777, Pf12780, Pf12781, Pf17852, Pf18198, Pf18199	1778	ENSG00000197102	DYNC1H1	B0I1R0; hsa:1778; Q14204; Q6DKQ7; Q8WU28; Q92814; Q9Y4G5	Ciliary landscape; Intraflagellar transport proteins binding to dynein	Separation of Sister Chromatids; MHC class II antigen presentation; Resolution of Sister Chromatid Cohesion; HSP90 chaperone cycle for steroid hormone receptors (SHR) in the presence of ligand; Recruitment of NuMA to mitotic centrosomes; RHO GTPases Activate Formins; COPI-mediated anterograde transport; COPI-independent Golgi-to-ER retrograde traffic; HCMV Early Events; Aggrephagy; EML4 and NUDC …	Phagosome; Vasopressin-regulated water reabsorption; Salmonella infection	25	0	0.965	0.701434	27.33	87.3	112.7	5.07272e+07	5.44968e+07	High	High	1
	Checked	Confidence	Annotated Sequence	Modifications	Qvality PEP	Qvality q-value	# Protein Groups	# Proteins	# PSMs	Master Protein Accessions	Positions in Master Proteins	Modifications in Master Proteins	# Missed Cleavages	Theo. MH+ [Da]	Abundance Ratio: (Heavy) / (Light)	Abundance Ratio P-Value: (Heavy) / (Light)	Abundance Ratio Variability [%]: (Heavy) / (Light)	Abundances (Grouped): Light	Abundances (Grouped): Heavy	Abundance: F2: Light, Sample	Abundance: F2: Heavy, Sample	Precursor Quan Result ID	Quan Info	Quan Channel	Found in Sample: [S2] F2: Light, Sample	Found in Sample: [S4] F2: Heavy, Sample	Confidence (by Search Engine): Sequest HT	DeltaM [ppm] (by Search Engine): Sequest HT	Percolator q-Value (by Search Engine): Sequest HT	Percolator PEP (by Search Engine): Sequest HT	XCorr (by Search Engine): Sequest HT	Top Apex RT [min]
	TRUE	High	[R].DAATIMQPYFTSNGLVTK.[A]		6.44448e-06	9.1126e-05	1	1	1	Q14204	Q14204 [2418-2435]		0	1956.97	0.957	0.723769	0	102.2	97.8	1.68743e+06	1.34391e+06	748		Light	High	Peak Found	High	1.31	0.0001192	3.186e-06	4.04	63.3
	TRUE	High	[R].DAATIMQPYFTSNGLVTK.[A]	1xLabel:13C(6)15N(2) [K18]	4.28842e-06	9.1126e-05	1	1	1	Q14204	Q14204 [2418-2435]		0	1964.99								748	Redundant	Heavy	Peak Found	High	High	0.92	0.0001192	2.09e-06	4.32	63.3
	TRUE	High	[R].DAATIMQPYFTSNGLVTK.[A]	1xOxidation [M6]	2.31805e-05	9.1126e-05	1	1	1	Q14204	Q14204 [2418-2435]		0	1972.97								747	No Quan Values	Light	High	Not Found	High	0.13	0.0001192	1.216e-05	3.83
	TRUE	High	[R].DAATIMQPYFTSNGLVTK.[A]	1xOxidation [M6]; 1xLabel:13C(6)15N(2) [K18]	8.10845e-07	9.1126e-05	1	1	1	Q14204	Q14204 [2418-2435]		0	1980.98								747	Redundant	Heavy	Not Found	High	High	-0.63	0.0001192	3.675e-07	3.78
	TRUE	High	[K].DLFQVAFNR.[V]	1xLabel:13C(6)15N(4) [R9]	0.00016158	9.1126e-05	1	1	1	Q14204	Q14204 [3862-3870]		0	1119.58	100	1e-17			200		1025500	968		Heavy	Not Found	High	High	-0.51	0.0001192	9.195e-05	2.98	60.32
	TRUE	High	[K].DSAIQQQVANLQMK.[I]	1xLabel:13C(6)15N(2) [K14]	3.10076e-05	9.1126e-05	1	1	1	Q14204	Q14204 [1229-1242]		0	1581.81	0.751	0.227936	0	114.2	85.8	1.61202e+06	1.00777e+06	1120		Heavy	Peak Found	High	High	3.73	0.0001192	1.645e-05	3.2	44.96
	TRUE	High	[K].EALELTDTGLLSGSEER.[V]		4.63139e-07	9.1126e-05	1	1	1	Q14204	Q14204 [1302-1318]		0	1819.89								1270	No Quan Values	Light	High	Not Found	High	0.06	0.0001192	2.053e-07	4.15
	TRUE	High	[K].EALELTDTGLLSGSEER.[V]	1xLabel:13C(6)15N(4) [R17]	2.63427e-06	9.1126e-05	1	1	1	Q14204	Q14204 [1302-1318]		0	1829.9								1270	Redundant	Heavy	Not Found	High	High	-0.92	0.0001192	1.253e-06	3.23
	TRUE	High	[K].EFGPVVIDYGK.[V]	1xLabel:13C(6)15N(2) [K11]	0.0229749	0.00166208	1	1	1	Q14204	Q14204 [1101-1111]		0	1231.64	0.803	0.287736	0	110.9	89.1	1.86702e+06	1.24729e+06	1445		Heavy	Peak Found	High	High	-1.21	0.001494	0.01584	2.32	48.44
	TRUE	High	[K].FNYGFEYLGVQDK.[L]	1xLabel:13C(6)15N(2) [K13]	6.78108e-06	9.1126e-05	1	1	1	Q14204	Q14204 [1866-1878]		0	1587.76	0.942	0.816883	0	103	97	747402	585823	1945		Heavy	Peak Found	High	High	-1.5	0.0001192	3.372e-06	2.9	58.95
	TRUE	High	[K].GKEDEGEEAASPMLQIQR.[D]		0.000804852	9.1126e-05	1	1	1	Q14204	Q14204 [2400-2417]		1	1987.94	0.998	0.937034	0	100.1	99.9	1.52997e+06	1.27082e+06	2221		Light	High	Peak Found	High	1.14	0.0001192	0.0004891	3.01	33.07
	TRUE	High	[K].GKEDEGEEAASPMLQIQR.[D]	1xLabel:13C(6)15N(2) [K2]; 1xLabel:13C(6)15N(4) [R18]	0.00203417	0.000224419	1	1	1	Q14204	Q14204 [2400-2417]		1	2005.96								2221	Redundant	Heavy	Peak Found	High	High	-0.38	0.0002185	0.001276	2.92	33.07
	TRUE	High	[K].GKEDEGEEAASPMLQIQR.[D]	1xOxidation [M13]; 1xLabel:13C(6)15N(2) [K2]; 1xLabel:13C(6)15N(4) [R18]	0.0143046	0.00130832	1	1	1	Q14204	Q14204 [2400-2417]		1	2021.96	1.127	0.690152	0	94	106	807782	757848	2223		Heavy	Peak Found	High	High	1.94	0.001212	0.009685	3.12	24.56
	TRUE	High	[R].KLEHLITELVHQR.[D]	1xLabel:13C(6)15N(2) [K1]; 1xLabel:13C(6)15N(4) [R13]	4.8674e-05	9.1126e-05	1	1	2	Q14204	Q14204 [1807-1819]		1	1633.95	11.579	1e-17	0	15.9	184.1	260283	2.50782e+06	2701		Heavy	Peak Found	High	High	0.22	0.0001192	2.619e-05	3.16	57.06
	TRUE	High	[R].IFVFEPPPGVK.[A]		0.0164847	0.00141682	1	1	1	Q14204	Q14204 [4144-4154]		0	1229.69	0.765	0.181858	0	113.3	86.7	3.81048e+06	2.42613e+06	3101		Light	High	Peak Found	High	0.39	0.001295	0.01118	2.6	55.97
	TRUE	High	[R].IFVFEPPPGVK.[A]	1xLabel:13C(6)15N(2) [K11]	0.0163684	0.00141682	1	1	1	Q14204	Q14204 [4144-4154]		0	1237.71								3101	Redundant	Heavy	Peak Found	High	High	0.46	0.001295	0.01113	2.64	55.97
	TRUE	High	[R].LGGSPFGPAGTGK.[T]		0.0224948	0.00166208	1	1	1	Q14204	Q14204 [1900-1912]		0	1145.59	0.627	0.0258157	0	122.9	77.1	2.57295e+06	1.34284e+06	3162		Light	High	Peak Found	High	0.08	0.001494	0.01552	2.27	26.17
	TRUE	High	[K].IKETVDQVEELRR.[D]		0.059981	0.00415845	1	1	1	Q14204	Q14204 [3208-3220]		2	1614.88	1.296	0.336408	0	87.1	112.9	1855840	2.00111e+06	3258		Light	High	Peak Found	High	0.21	0.003498	0.04341	2.96	23.35
	TRUE	High	[R].ILDDDTIITTLENLKR.[E]	1xLabel:13C(6)15N(2) [K15]; 1xLabel:13C(6)15N(4) [R16]	0.0406954	0.0026405	1	1	1	Q14204	Q14204 [3760-3775]		1	1891.05	1.158	0.586076	0	92.7	107.3	440136	424045	3303		Heavy	Peak Found	High	High	0.04	0.002359	0.02892	2.94	71.67
	TRUE	High	[K].LNTQEIFDDWAR.[K]	1xLabel:13C(6)15N(4) [R12]	0.00285584	0.000477939	1	1	1	Q14204	Q14204 [693-704]		0	1517.73	1.125	0.681984	0	94.1	105.9	928547	869445	3573		Heavy	Peak Found	High	High	1.9	0.0004125	0.001823	2.68	64.49
	TRUE	High	[R].IQGLTVEQAEAVVR.[L]		0.00107576	9.1126e-05	1	1	1	Q14204	Q14204 [3924-3937]		0	1512.84	1.332	0.295145	0	85.8	114.2	1.70429e+06	1.88843e+06	3654		Light	High	Peak Found	High	-1.37	0.0001192	0.0006605	3.05	48.52
	TRUE	High	[K].MVVLSLPR.[I]		0.00318188	0.000477939	1	1	1	Q14204	Q14204 [991-998]		0	914.549								4573	No Quan Values	Light	High	Not Found	High	0.21	0.0004125	0.002034	1.82
	TRUE	High	[K].NYMSNPSYNYEIVNR.[A]		2.59622e-06	9.1126e-05	1	1	1	Q14204	Q14204 [3370-3384]		0	1863.83								4898	No Quan Values	Light	High	Not Found	High	-1.18	0.0001192	1.241e-06	4.7
	TRUE	High	[K].NYMSNPSYNYEIVNR.[A]	1xLabel:13C(6)15N(4) [R15]	7.61797e-06	9.1126e-05	1	1	1	Q14204	Q14204 [3370-3384]		0	1873.84								4898	Redundant	Heavy	Not Found	High	High	-0.3	0.0001192	3.789e-06	4.21
	TRUE	High	[K].NYMSNPSYNYEIVNR.[A]	1xOxidation [M3]	1.42996e-06	9.1126e-05	1	1	1	Q14204	Q14204 [3370-3384]		0	1879.83								4896	No Quan Values	Light	High	Not Found	High	0.9	0.0001192	6.629e-07	4.12
	TRUE	High	[K].NYMSNPSYNYEIVNR.[A]	1xOxidation [M3]; 1xLabel:13C(6)15N(4) [R15]	8.31274e-06	9.1126e-05	1	1	1	Q14204	Q14204 [3370-3384]		0	1889.84								4896	Redundant	Heavy	Not Found	High	High	0.27	0.0001192	4.15e-06	4.11
	TRUE	High	[K].QTDVLQQLSIQMANAK.[F]		0.0337601	0.0020598	1	1	1	Q14204	Q14204 [1850-1865]		0	1787.93								5136	Redundant	Light	High	Peak Found	High	-3.61	0.001844	0.02366	2.38	62.51
	TRUE	High	[K].QTDVLQQLSIQMANAK.[F]	1xLabel:13C(6)15N(2) [K16]	0.00024454	9.1126e-05	1	1	1	Q14204	Q14204 [1850-1865]		0	1795.95	0.591	0.0564176	0	125.7	74.3	418260	205850	5136		Heavy	Peak Found	High	High	-0.29	0.0001192	0.000141	3.14	62.51
	TRUE	High	[K].SLLQALNEVK.[G]		0.0117225	0.00122778	1	1	1	Q14204	Q14204 [3748-3757]		0	1114.65	1.224	0.452394	0	89.9	110.1	1.93646e+06	1.97261e+06	5538		Light	High	Peak Found	High	0.97	0.001157	0.007864	1.64	52.15
	TRUE	High	[K].TKPVTGNLRPEEALQALTIYEGK.[F]		9.16373e-05	9.1126e-05	1	1	1	Q14204	Q14204 [1264-1286]		0	2528.37	0.974	0.90216	0	101.3	98.7	918196	743859	6057		Light	High	Peak Found	High	0.74	0.0001192	5.062e-05	4.13	60.89
	TRUE	High	[R].TPVIDADKPVSSQLR.[V]		3.34888e-06	9.1126e-05	1	1	1	Q14204	Q14204 [122-136]		0	1625.89	0.896	0.453622	0	105.5	94.5	4888350	3.64661e+06	6209		Light	High	Peak Found	High	-0.16	0.0001192	1.612e-06	3.32	28.74
	TRUE	High	[R].TTDLLTDWEK.[T]	1xLabel:13C(6)15N(2) [K10]	0.00455946	0.000596234	1	1	1	Q14204	Q14204 [1254-1263]		0	1229.61	1.008	0.960634	0	99.6	100.4	3009218	2.52387e+06	6279		Heavy	Peak Found	High	High	0.83	0.0005035	0.002952	2.53	51.17
	TRUE	High	[K].VAAPDVVVPTLDTVR.[H]		0.00415274	0.000596234	1	1	1	Q14204	Q14204 [2562-2576]		0	1551.87								6364	No Quan Values	Light	High	Not Found	High	0.31	0.0005035	0.002681	2.6
	TRUE	High	[K].VEDPTFLNQLQSGVNR.[W]		0.000584797	9.1126e-05	1	1	1	Q14204	Q14204 [236-251]		0	1816.92								6467	No Quan Values	Light	High	Not Found	High	-2.15	0.0001192	0.0003508	2.91
	TRUE	High	[K].VEDPTFLNQLQSGVNR.[W]	1xLabel:13C(6)15N(4) [R16]	0.00193381	0.000224419	1	1	1	Q14204	Q14204 [236-251]		0	1826.93								6467	Redundant	Heavy	Not Found	High	High	2.36	0.0002185	0.001211	2.82
	TRUE	High	[K].VEPAVIEAQNAVK.[S]	1xLabel:13C(6)15N(2) [K13]	0.00838377	0.000914196	1	1	1	Q14204	Q14204 [3285-3297]		0	1375.77	0.921	0.575787	0	104.1	95.9	4152635	3.18108e+06	6512		Heavy	Peak Found	High	High	-0.24	0.0008339	0.005557	2.37	31.55
	TRUE	High	[R].VLLTTQGVDMISK.[M]		7.58506e-05	9.1126e-05	1	1	1	Q14204	Q14204 [4330-4342]		0	1404.78	1.27	0.367048	0	88.1	111.9	3.1812e+06	3.36067e+06	6725		Light	High	Peak Found	High	-0.24	0.0001192	4.171e-05	2.98	47.72
	TRUE	High	[R].VLLTTQGVDMISK.[M]	1xLabel:13C(6)15N(2) [K13]	2.42144e-05	9.1126e-05	1	1	1	Q14204	Q14204 [4330-4342]		0	1412.79								6725	Redundant	Heavy	Peak Found	High	High	-0.18	0.0001192	1.267e-05	3.6	47.72
	TRUE	High	[R].VLRPQVTAVAQQNQGEVPEPQDMK.[V]		1.56037e-06	9.1126e-05	1	1	1	Q14204	Q14204 [483-506]		0	2662.36								6760	Redundant	Light	High	Peak Found	High	0.89	0.0001192	7.304e-07	4.51	39.08
	TRUE	High	[R].VLRPQVTAVAQQNQGEVPEPQDMK.[V]	1xDeamidated [Q14]	0.00106028	9.1126e-05	1	1	2	Q14204	Q14204 [483-506]		0	2663.35								6758	No Quan Values	Light	High	Not Found	High	4.87	0.0001192	0.0006515	4.67
	TRUE	High	[R].VLRPQVTAVAQQNQGEVPEPQDMK.[V]	1xOxidation [M23]	0.000104452	9.1126e-05	1	1	1	Q14204	Q14204 [483-506]		0	2678.36	0.611	0.023682	0	124.2	75.8	2.11772e+06	1.0766e+06	6757		Light	High	Peak Found	High	-0.66	0.0001192	5.804e-05	3.38	32.62
	TRUE	High	[R].VLRPQVTAVAQQNQGEVPEPQDMK.[V]	1xLabel:13C(6)15N(2) [K24]; 1xLabel:13C(6)15N(4) [R3]	3.63878e-05	9.1126e-05	1	1	1	Q14204	Q14204 [483-506]		0	2680.38	0.563	0.00953376	0	127.9	72.1	4.11141e+06	1.92667e+06	6760		Heavy	Peak Found	High	High	-0.66	0.0001192	1.943e-05	4.21	39.08
	TRUE	High	[R].VLRPQVTAVAQQNQGEVPEPQDMK.[V]	1xDeamidated [Q21]; 1xLabel:13C(6)15N(2) [K24]; 1xLabel:13C(6)15N(4) [R3]	0.000737727	9.1126e-05	1	1	1	Q14204	Q14204 [483-506]		0	2681.37								6758	Redundant	Heavy	Not Found	High	High	4.73	0.0001192	0.0004448	4.37
	TRUE	High	[R].VLRPQVTAVAQQNQGEVPEPQDMK.[V]	1xOxidation [M23]; 1xLabel:13C(6)15N(2) [K24]; 1xLabel:13C(6)15N(4) [R3]	3.07829e-05	9.1126e-05	1	1	1	Q14204	Q14204 [483-506]		0	2696.38								6757	Redundant	Heavy	Peak Found	High	High	-0.36	0.0001192	1.626e-05	4.97	32.62
	TRUE	High	[K].VNFLPEIITLSK.[E]		0.00598892	0.000694413	1	1	1	Q14204	Q14204 [737-748]		0	1373.8	31.286	1e-17	0	6.2	193.8	491453	12794477	6826		Light	High	Peak Found	High	0.73	0.0005813	0.003913	2.7	72.46
	TRUE	High	[K].VNFLPEIITLSK.[E]	1xLabel:13C(6)15N(2) [K12]	0.096227	0.00663093	1	1	1	Q14204	Q14204 [737-748]		0	1381.82								6826	Redundant	Heavy	Peak Found	High	High	-2.21	0.005508	0.07206	2.29	73.47
	TRUE	High	[K].VTDFGDKVEDPTFLNQLQSGVNR.[W]		0.00249006	0.000224419	1	1	1	Q14204	Q14204 [229-251]		1	2579.27	0.877	0.514926	0	106.5	93.5	1.63955e+06	1.19696e+06	6929		Light	High	Peak Found	High	-2.38	0.0002185	0.00158	3.21	58.91
	TRUE	High	[R].WTDENIDTVALK.[H]		0.000804852	9.1126e-05	1	1	1	Q14204	Q14204 [2845-2856]		0	1404.7	1.006	0.844738	0	99.7	100.3	1890887	1.58251e+06	7064		Light	High	Peak Found	High	1.17	0.0001192	0.0004882	2.84	43.74
	TRUE	High	[R].WTDENIDTVALK.[H]	1xLabel:13C(6)15N(2) [K12]	0.0028765	0.000477939	1	1	1	Q14204	Q14204 [2845-2856]		0	1412.71								7064	Redundant	Heavy	Peak Found	High	High	0.63	0.0004125	0.001831	2.66	43.74
	TRUE	High	[K].YTGEDFDEDLR.[T]		0.000220878	9.1126e-05	1	1	1	Q14204	Q14204 [2967-2977]		0	1359.57	0.888	0.459794	0	106	94	2.14773e+06	1.58627e+06	7267		Light	High	Peak Found	High	0.3	0.0001192	0.0001265	2.5	36.17
	TRUE	High	[K].YTGEDFDEDLR.[T]	1xLabel:13C(6)15N(4) [R11]	0.00372801	0.000477939	1	1	1	Q14204	Q14204 [2967-2977]		0	1369.58								7267	Redundant	Heavy	Peak Found	High	High	-1.29	0.0004125	0.002394	2.38	36.17
TRUE	High	Master Protein	P60709	Actin, cytoplasmic 1 OS=Homo sapiens OX=9606 GN=ACTB PE=1 SV=1	0	222.426	49	14	91	1	375	41.7	5.48	281.77	14	Pf00022	60	ENSG00000075624	ACTB	hsa:60; P02570; P60709; P70514; P99021; Q11211; Q64316; Q75MN2; Q96B34; Q96HG5	Arrhythmogenic right ventricular cardiomyopathy; Pathogenic Escherichia coli infection; Common pathways underlying drug addiction; Myometrial relaxation and contraction pathways; Focal adhesion; Fas ligand pathway and stress induction of heat shock proteins; Ebola virus pathway in host; Acute viral myocarditis; Thermogenesis; Mechanoregulation and pathology of YAP/TAZ via Hippo and non-Hippo mech…	UCH proteinases; HATs acetylate histones; Clathrin-mediated endocytosis; RHO GTPases Activate Formins; Recycling pathway of L1; EPH-ephrin mediated repulsion of cells; B-WICH complex positively regulates rRNA expression; Regulation of actin dynamics for phagocytic cup formation; FCGR3A-mediated phagocytosis; RHO GTPases Activate WASPs and WAVEs; Factors involved in megakaryocyte development and p…	Rap1 signaling pathway; Phagosome; Apoptosis; Hippo signaling pathway; Focal adhesion; Adherens junction; Tight junction; Platelet activation; Neutrophil extracellular trap formation; Leukocyte transendothelial migration; Thermogenesis; Regulation of actin cytoskeleton; Thyroid hormone signaling pathway; Oxytocin signaling pathway; Gastric acid secretion; Amyotrophic lateral sclerosis; Bacterial …	77	14	1.029	0.988763	20.37	104.6	95.4	7.16277e+08	5.44103e+08	High	High	1	Met-loss+Acetyl [N-Term]
	Checked	Confidence	Annotated Sequence	Modifications	Qvality PEP	Qvality q-value	# Protein Groups	# Proteins	# PSMs	Master Protein Accessions	Positions in Master Proteins	Modifications in Master Proteins	# Missed Cleavages	Theo. MH+ [Da]	Abundance Ratio: (Heavy) / (Light)	Abundance Ratio P-Value: (Heavy) / (Light)	Abundance Ratio Variability [%]: (Heavy) / (Light)	Abundances (Grouped): Light	Abundances (Grouped): Heavy	Abundance: F2: Light, Sample	Abundance: F2: Heavy, Sample	Precursor Quan Result ID	Quan Info	Quan Channel	Found in Sample: [S2] F2: Light, Sample	Found in Sample: [S4] F2: Heavy, Sample	Confidence (by Search Engine): Sequest HT	DeltaM [ppm] (by Search Engine): Sequest HT	Percolator q-Value (by Search Engine): Sequest HT	Percolator PEP (by Search Engine): Sequest HT	XCorr (by Search Engine): Sequest HT	Top Apex RT [min]
	TRUE	High	[R].AVFPSIVGRPR.[QH]		0.00135651	9.1126e-05	3	9	2	P60709; P68133; P63261	P60709 [29-39]; P68133 [31-41]; P63261 [29-39]		0	1198.71	1	0.780626	0	100	100	137934478	114736827	690	Shared	Light	High	Peak Found	High	0.67	0.0001192	0.000841	2.28	35.39
	TRUE	High	[R].DLTDYLMK.[I]	1xLabel:13C(6)15N(2) [K8]	0.0229749	0.00166208	4	7	1	P60709; P68133; Q562R1; P63261	P60709 [184-191]; P68133 [186-193]; Q562R1 [185-192]; P63261 [184-191]		0	1006.5	1.177	0.542019	0	91.9	108.1	14885393	14577660	1020	Shared	Heavy	Peak Found	High	High	0.12	0.001494	0.01587	2.13	53.88
	TRUE	High	[K].DLYANTVLSGGTTMYPGIADR.[M]		1.15802e-06	9.1126e-05	2	2	3	P60709; P63261	P60709 [292-312]; P63261 [292-312]		0	2215.07								1027	Redundant	Light	High	Peak Found	High	1.05	0.0001192	5.347e-07	4.95	64.71
	TRUE	High	[K].DLYANTVLSGGTTMYPGIADR.[M]	1xLabel:13C(6)15N(4) [R21]	1.96325e-07	9.1126e-05	2	2	2	P60709; P63261	P60709 [292-312]; P63261 [292-312]		0	2225.08	1.01	0.892724	0	99.5	100.5	3.85652e+06	3.24046e+06	1027	Shared	Heavy	Peak Found	High	High	0.84	0.0001192	8.369e-08	4.48	64.71
	TRUE	High	[K].DLYANTVLSGGTTMYPGIADR.[M]	1xOxidation [M14]	2.95937e-06	9.1126e-05	2	2	1	P60709; P63261	P60709 [292-312]; P63261 [292-312]		0	2231.06								1025	Redundant	Light	High	Peak Found	High	-1.79	0.0001192	1.423e-06	4.82	58.64
	TRUE	High	[K].DLYANTVLSGGTTMYPGIADR.[M]	1xOxidation [M14]; 1xLabel:13C(6)15N(4) [R21]	1.07923e-10	9.1126e-05	2	2	1	P60709; P63261	P60709 [292-312]; P63261 [292-312]		0	2241.07	1.037	0.906424	0	98.2	101.8	7.07757e+06	6.10946e+06	1025	Shared	Heavy	Peak Found	High	High	-0.02	0.0001192	3.361e-11	5.65	58.64
	TRUE	High	[K].EITALAPSTMK.[I]		1.24015e-05	9.1126e-05	3	6	5	P60709; P68133; P63261	P60709 [316-326]; P68133 [318-328]; P63261 [316-326]		0	1161.62								1600	Redundant	Light	High	Peak Found	High	-0.09	0.0001192	6.296e-06	2.97	31.19
	TRUE	High	[K].EITALAPSTMK.[I]	1xLabel:13C(6)15N(2) [K11]	0.000172506	9.1126e-05	3	6	2	P60709; P68133; P63261	P60709 [316-326]; P68133 [318-328]; P63261 [316-326]		0	1169.63	1.019	0.862032	0	99.1	100.9	84514976	71667384	1600	Shared	Heavy	Peak Found	High	High	-0.22	0.0001192	9.805e-05	2.67	31.19
	TRUE	High	[K].EITALAPSTMK.[I]	1xOxidation [M10]	0.00252626	0.000224419	3	6	11	P60709; P68133; P63261	P60709 [316-326]; P68133 [318-328]; P63261 [316-326]		0	1177.61								1601	Redundant	Light	High	Peak Found	High	-0.37	0.0002185	0.001608	2.31	25.87
	TRUE	High	[K].EITALAPSTMK.[I]	1xOxidation [M10]; 1xLabel:13C(6)15N(2) [K11]	0.0931901	0.00644445	3	6	1	P60709; P68133; P63261	P60709 [316-326]; P68133 [318-328]; P63261 [316-326]		0	1185.63	1.382	0.13769	0	84	116	2.14828e+07	2.47077e+07	1601	Shared	Heavy	Peak Found	High	High	-1.32	0.005303	0.06965	1.95	22.95
	TRUE	High	[R].HQGVMVGMGQK.[D]	2xOxidation [M5; M8]; 1xLabel:13C(6)15N(2) [K11]	0.0224948	0.00166208	4	7	1	P60709; P68133; Q562R1; P63261	P60709 [40-50]; P68133 [42-52]; Q562R1 [41-51]; P63261 [40-50]		0	1211.58								2597	No Quan Values	Heavy	Not Found	High	High	0.19	0.001494	0.01544	1.97
	TRUE	High	[R].HQGVMVGMGQKDSYVGDEAQSKR.[G]	1xOxidation [M8]	9.20379e-06	9.1126e-05	3	6	1	P60709; P68133; P63261	P60709 [40-62]; P68133 [42-64]; P63261 [40-62]		2	2523.17								2598	Redundant	Light	High	Peak Found	High	0.95	0.0001192	4.638e-06	3.8	16.36
	TRUE	High	[R].HQGVMVGMGQKDSYVGDEAQSKR.[G]	1xOxidation [M8]; 2xLabel:13C(6)15N(2) [K11; K22]; 1xLabel:13C(6)15N(4) [R23]	0.00010911	9.1126e-05	3	6	1	P60709; P68133; P63261	P60709 [40-62]; P68133 [42-64]; P63261 [40-62]		2	2549.21	1.28	0.38034	0	87.7	112.3	584394	622359	2598	Shared	Heavy	Peak Found	High	High	1.22	0.0001192	6.081e-05	4.02	16.36
	TRUE	High	[R].KDLYANTVLSGGTTMYPGIADR.[M]		5.24096e-07	9.1126e-05	2	2	1	P60709; P63261	P60709 [291-312]; P63261 [291-312]		1	2343.16	1.638	0.0434842	0	75.8	124.2	2.21918e+06	3.02495e+06	2635	Shared	Light	High	Peak Found	High	-0.13	0.0001192	2.341e-07	5.14	54.22
	TRUE	High	[R].KDLYANTVLSGGTTMYPGIADR.[M]	1xLabel:13C(6)15N(2) [K1]; 1xLabel:13C(6)15N(4) [R22]	0.0072666	0.000812034	2	2	1	P60709; P63261	P60709 [291-312]; P63261 [291-312]		1	2361.19								2635	Redundant	Heavy	Peak Found	High	High	-0.34	0.0007607	0.004776	3.5	54.22
	TRUE	High	[K].IWHHTFYNELR.[V]		9.72539e-07	9.1126e-05	3	9	8	P60709; P68133; P63261	P60709 [85-95]; P68133 [87-97]; P63261 [85-95]		0	1515.75								3985	Redundant	Light	High	Peak Found	High	0.45	0.0001192	4.453e-07	4.51	40.92
	TRUE	High	[K].IWHHTFYNELR.[V]	1xLabel:13C(6)15N(4) [R11]	5.65367e-06	9.1126e-05	3	9	11	P60709; P68133; P63261	P60709 [85-95]; P68133 [87-97]; P63261 [85-95]		0	1525.76	1.206	0.458207	0	90.7	109.3	3.57377e+07	3.58585e+07	3985	Shared	Heavy	Peak Found	High	High	-0.02	0.0001192	2.778e-06	3.78	40.92
	TRUE	High	[-].MDDDIAALVVDNGSGMCK.[A]	1xCarbamidomethyl [C17]; 1xMet-loss+Acetyl [N-Term]	6.15041e-07	9.1126e-05	1	1	1	P60709	P60709 [1-18]	P60709 1xMet-loss+Acetyl [N-Term]	0	1821.8								4229	Redundant	Light	High	Peak Found	High	0.94	0.0001192	2.766e-07	4.54	69.38
	TRUE	High	[-].MDDDIAALVVDNGSGMCK.[A]	1xCarbamidomethyl [C17]; 1xLabel:13C(6)15N(2) [K18]; 1xMet-loss+Acetyl [N-Term]	3.27025e-09	9.1126e-05	1	1	1	P60709	P60709 [1-18]	P60709 1xMet-loss+Acetyl [N-Term]	0	1829.81	1.02	0.962502	0	99	101	930089	789221	4229		Heavy	Peak Found	High	High	-0.02	0.0001192	1.181e-09	5.22	69.38
	TRUE	High	[-].MDDDIAALVVDNGSGMCK.[A]	1xCarbamidomethyl [C17]; 1xOxidation [M16]; 1xMet-loss+Acetyl [N-Term]	6.53891e-06	9.1126e-05	1	1	1	P60709	P60709 [1-18]	P60709 1xMet-loss+Acetyl [N-Term]	0	1837.79	1.179	0.566493	0	91.8	108.2	776795	761924	4228		Light	High	Peak Found	High	-0.2	0.0001192	3.231e-06	3.37	63.42
	TRUE	High	[R].MQKEITALAPSTMK.[I]		0.00117353	9.1126e-05	3	6	1	P60709; P68133; P63261	P60709 [313-326]; P68133 [315-328]; P63261 [313-326]		1	1548.81	1.163	0.620264	0	92.5	107.5	3.81867e+06	3.69489e+06	4434	Shared	Light	High	Peak Found	High	-0.52	0.0001192	0.0007207	3.66	30.31
	TRUE	High	[R].MQKEITALAPSTMK.[I]	2xLabel:13C(6)15N(2) [K3; K14]	6.85082e-05	9.1126e-05	3	6	2	P60709; P68133; P63261	P60709 [313-326]; P68133 [315-328]; P63261 [313-326]		1	1564.84								4434	Redundant	Heavy	Peak Found	High	High	0.5	0.0001192	3.758e-05	3.38	30.31
	TRUE	High	[K].QEYDESGPSIVHR.[K]		0.0444977	0.00273013	2	7	1	P60709; P63261	P60709 [360-372]; P63261 [360-372]		0	1516.7	0.97	0.691762	0	101.5	98.5	7043487	5.68474e+06	4968	Shared	Light	High	Peak Found	High	-0.06	0.002423	0.03178	2.34
	TRUE	High	[K].QEYDESGPSIVHR.[K]	1xLabel:13C(6)15N(4) [R13]	0.00780542	0.000914196	2	7	2	P60709; P63261	P60709 [360-372]; P63261 [360-372]		0	1526.71								4968	Redundant	Heavy	Peak Found	High	High	-0.36	0.0008339	0.005138	2.05	20
	TRUE	High	[KR].SYELPDGQVITIGNER.[F]		6.96779e-09	9.1126e-05	4	10	5	P60709; P68133; Q562R1; P63261	P60709 [239-254]; P68133 [241-256]; Q562R1 [240-255]; P63261 [239-254]		0	1790.89	0.956	0.601971	0	102.3	97.7	1.25194e+08	99589341	5861	Shared	Light	High	Peak Found	High	-0.31	0.0001192	2.588e-09	4.56	56.85
	TRUE	High	[KR].SYELPDGQVITIGNER.[F]	1xLabel:13C(6)15N(4) [R16]	5.52095e-09	9.1126e-05	4	10	3	P60709; P68133; Q562R1; P63261	P60709 [239-254]; P68133 [241-256]; Q562R1 [240-255]; P63261 [239-254]		0	1800.9								5861	Redundant	Heavy	Peak Found	High	High	-0.15	0.0001192	2.027e-09	5	56.85
	TRUE	High	[R].TTGIVMDSGDGVTHTVPIYEGYALPHAILR.[L]	1xOxidation [M6]	2.68099e-05	9.1126e-05	2	2	2	P60709; P63261	P60709 [148-177]; P63261 [148-177]		0	3199.61	0.853	0.37892	0	107.9	92.1	2.43966e+06	1.73171e+06	6282	Shared	Light	High	Peak Found	High	-0.35	0.0001192	1.411e-05	5.09	61.42
	TRUE	High	[R].VAPEEHPVLLTEAPLNPK.[A]		5.22489e-08	9.1126e-05	2	2	9	P60709; P63261	P60709 [96-113]; P63261 [96-113]		0	1954.06	0.706	0.0299174	0	117.2	82.8	2.67781e+08	1.57306e+08	6411	Shared	Light	High	Peak Found	High	0.57	0.0001192	2.111e-08	4.24	43.61
	TRUE	High	[R].VAPEEHPVLLTEAPLNPK.[A]	1xLabel:13C(6)15N(2) [K18]	7.8518e-08	9.1126e-05	2	2	3	P60709; P63261	P60709 [96-113]; P63261 [96-113]		0	1962.08								6411	Redundant	Heavy	Peak Found	High	High	0.06	0.0001192	3.238e-08	3.72	43.61
TRUE	High	Master Protein	P68363	Tubulin alpha-1B chain OS=Homo sapiens OX=9606 GN=TUBA1B PE=1 SV=1	0	220.639	42	15	101	3	451	50.1	5.06	330.75	15	Pf00091, Pf03953	10376	ENSG00000123416	TUBA1B	hsa:10376; P04687; P05209; P68363; Q27I68; Q8WU19	Alzheimer's disease and miRNA effects; Pathogenic Escherichia coli infection; Allograft Rejection; Parkin-ubiquitin proteasomal system pathway; Alzheimer's disease	Separation of Sister Chromatids; The role of GTSE1 in G2/M progression after G2 checkpoint; COPI-mediated anterograde transport; Resolution of Sister Chromatid Cohesion; Hedgehog 'off' state; HSP90 chaperone cycle for steroid hormone receptors (SHR) in the presence of ligand; RHO GTPases Activate Formins; EML4 and NUDC in mitotic spindle formation; COPI-dependent Golgi-to-ER retrograde traffic; R…	Phagosome; Apoptosis; Tight junction; Gap junction; Alzheimer disease; Parkinson disease; Amyotrophic lateral sclerosis; Huntington disease; Prion disease; Pathways of neurodegeneration; Pathogenic Escherichia coli infection; Salmonella infection	47	15	1.004	0.875347	22.64	100.9	99.1	4.45453e+08	3.64035e+08	High	High	1
	Checked	Confidence	Annotated Sequence	Modifications	Qvality PEP	Qvality q-value	# Protein Groups	# Proteins	# PSMs	Master Protein Accessions	Positions in Master Proteins	Modifications in Master Proteins	# Missed Cleavages	Theo. MH+ [Da]	Abundance Ratio: (Heavy) / (Light)	Abundance Ratio P-Value: (Heavy) / (Light)	Abundance Ratio Variability [%]: (Heavy) / (Light)	Abundances (Grouped): Light	Abundances (Grouped): Heavy	Abundance: F2: Light, Sample	Abundance: F2: Heavy, Sample	Precursor Quan Result ID	Quan Info	Quan Channel	Found in Sample: [S2] F2: Light, Sample	Found in Sample: [S4] F2: Heavy, Sample	Confidence (by Search Engine): Sequest HT	DeltaM [ppm] (by Search Engine): Sequest HT	Percolator q-Value (by Search Engine): Sequest HT	Percolator PEP (by Search Engine): Sequest HT	XCorr (by Search Engine): Sequest HT	Top Apex RT [min]
	TRUE	High	[R].AVCMLSNTTAIAEAWAR.[L]	1xCarbamidomethyl [C3]	0.000299733	9.1126e-05	1	6	1	P68363	P68363 [374-390]		0	1864.9								680	No Quan Values	Light	High	Not Found	High	-1.69	0.0001192	0.0001741	3.49
	TRUE	High	[R].AVFVDLEPTVIDEVR.[T]		5.26303e-08	9.1126e-05	2	3	6	P68363; Q9BQE3	P68363 [65-79]; Q9BQE3 [65-79]		0	1701.91	0.991	0.745087	0	100.4	99.6	3.4041e+07	2.80745e+07	693	Shared	Light	High	Peak Found	High	-0.58	0.0001192	2.123e-08	4.85	67.01
	TRUE	High	[R].AVFVDLEPTVIDEVR.[T]	1xLabel:13C(6)15N(4) [R15]	5.4184e-08	9.1126e-05	2	3	6	P68363; Q9BQE3	P68363 [65-79]; Q9BQE3 [65-79]		0	1711.91								693	Redundant	Heavy	Peak Found	High	High	-0.41	0.0001192	2.188e-08	4.58	67.01
	TRUE	High	[K].DVNAAIATIK.[T]		1.35325e-05	9.1126e-05	2	5	4	P68363; Q9BQE3	P68363 [327-336]; Q9BQE3 [327-336]		0	1015.58	1.134	0.682908	0	93.7	106.3	75747352	71487632	1193	Shared	Light	High	Peak Found	High	-0.28	0.0001192	6.918e-06	3.19	33.5
	TRUE	High	[K].DVNAAIATIK.[T]	1xLabel:13C(6)15N(2) [K10]	1.34345e-05	9.1126e-05	2	5	3	P68363; Q9BQE3	P68363 [327-336]; Q9BQE3 [327-336]		0	1023.59								1193	Redundant	Heavy	Peak Found	High	High	0.23	0.0001192	6.845e-06	3.07	33.5
	TRUE	High	[K].DYEEVGVDSVEGEGEEEGEEY.[-]		6.95991e-07	9.1126e-05	1	2	1	P68363	P68363 [431-451]		0	2348.9									Indistinguishable Channels		Not Found	Not Found	High	-0.41	0.0001192	3.142e-07	4.41	54.77
	TRUE	High	[K].EIIDLVLDR.[I]		0.0103855	0.00122778	2	3	1	P68363; Q9BQE3	P68363 [113-121]; Q9BQE3 [113-121]		0	1085.62	1.013	0.879831	0	99.3	100.7	4.68698e+06	3.95157e+06	1562	Shared	Light	High	Peak Found	High	-0.37	0.001089	0.006923	2.1	60.44
	TRUE	High	[R].LDHKFDLMYAK.[R]		5.94897e-06	9.1126e-05	2	7	2	P68363; Q9BQE3	P68363 [391-401]; Q9BQE3 [391-401]		1	1380.7	1.204	0.463783	0	90.8	109.2	17136282	17165286	2927	Shared	Light	High	Peak Found	High	-0.37	0.0001192	2.943e-06	4.47	33.79
	TRUE	High	[R].LDHKFDLMYAK.[R]	1xOxidation [M8]	0.00178596	0.000224419	2	7	2	P68363; Q9BQE3	P68363 [391-401]; Q9BQE3 [391-401]		1	1396.69	1.222	0.414558	0	90	110	11018602	11207455	2928	Shared	Light	High	Peak Found	High	-0.97	0.0002185	0.00112	2.59	25.87
	TRUE	High	[R].LDHKFDLMYAK.[R]	2xLabel:13C(6)15N(2) [K4; K11]	6.93067e-06	9.1126e-05	2	7	2	P68363; Q9BQE3	P68363 [391-401]; Q9BQE3 [391-401]		1	1396.73								2927	Redundant	Heavy	Peak Found	High	High	-0.21	0.0001192	3.452e-06	4.24	33.79
	TRUE	High	[R].LDHKFDLMYAK.[R]	1xOxidation [M8]; 2xLabel:13C(6)15N(2) [K4; K11]	0.000753966	9.1126e-05	2	7	2	P68363; Q9BQE3	P68363 [391-401]; Q9BQE3 [391-401]		1	1412.72								2928	Redundant	Heavy	Peak Found	High	High	-0.48	0.0001192	0.0004561	2.54	25.87
	TRUE	High	[R].LDHKFDLMYAKR.[A]		1.05677e-05	9.1126e-05	2	7	2	P68363; Q9BQE3	P68363 [391-402]; Q9BQE3 [391-402]		2	1536.8								2930	Redundant	Light	High	Peak Found	High	-0.55	0.0001192	5.339e-06	2.98	29.27
	TRUE	High	[R].LDHKFDLMYAKR.[A]	1xOxidation [M8]	0.00329857	0.000477939	2	7	1	P68363; Q9BQE3	P68363 [391-402]; Q9BQE3 [391-402]		2	1552.79	1.342	0.185914	0	85.4	114.6	10216906	11406582	2929	Shared	Light	High	Peak Found	High	-0.59	0.0004125	0.002117	1.79	22
	TRUE	High	[R].LDHKFDLMYAKR.[A]	2xLabel:13C(6)15N(2) [K4; K11]; 1xLabel:13C(6)15N(4) [R12]	3.31051e-05	9.1126e-05	2	7	2	P68363; Q9BQE3	P68363 [391-402]; Q9BQE3 [391-402]		2	1562.84	1.384	0.135633	0	83.9	116.1	10467143	12055697	2930	Shared	Heavy	Peak Found	High	High	-0.32	0.0001192	1.76e-05	2.84	29.27
	TRUE	High	[R].LDHKFDLMYAKR.[A]	1xOxidation [M8]; 2xLabel:13C(6)15N(2) [K4; K11]; 1xLabel:13C(6)15N(4) [R12]	0.000346622	9.1126e-05	2	7	1	P68363; Q9BQE3	P68363 [391-402]; Q9BQE3 [391-402]		2	1578.83								2929	Redundant	Heavy	Peak Found	High	High	-0.06	0.0001192	0.0002025	1.84	22
	TRUE	High	[R].IHFPLATYAPVISAEK.[A]		1.05798e-07	9.1126e-05	2	6	10	P68363; Q9BQE3	P68363 [265-280]; Q9BQE3 [265-280]		0	1756.96	0.88	0.331439	0	106.4	93.6	3.56115e+07	2.60814e+07	3235	Shared	Light	High	Peak Found	High	0.29	0.0001192	4.402e-08	3.54	60.62
	TRUE	High	[R].IHFPLATYAPVISAEK.[A]	1xLabel:13C(6)15N(2) [K16]	1.23637e-06	9.1126e-05	2	6	7	P68363; Q9BQE3	P68363 [265-280]; Q9BQE3 [265-280]		0	1764.98								3235	Redundant	Heavy	Peak Found	High	High	0.38	0.0001192	5.72e-07	3.86	60.62
	TRUE	High	[R].NLDIERPTYTNLNR.[L]		0.00496984	0.000694413	2	7	1	P68363; Q9BQE3	P68363 [216-229]; Q9BQE3 [216-229]		0	1718.88	0.872	0.306382	0	106.8	93.2	11851374	8597827	4714	Shared	Light	High	Peak Found	High	-0.58	0.0005813	0.003225	2.76	35.73
	TRUE	High	[R].NLDIERPTYTNLNR.[L]	2xLabel:13C(6)15N(4) [R6; R14]	0.0782108	0.00515555	2	7	1	P68363; Q9BQE3	P68363 [216-229]; Q9BQE3 [216-229]		0	1738.9								4714	Redundant	Heavy	Peak Found	High	High	-0.25	0.004323	0.05792	2.54	35.73
	TRUE	High	[R].QLFHPEQLITGK.[E]		0.000993296	9.1126e-05	2	8	3	P68363; Q9BQE3	P68363 [85-96]; Q9BQE3 [85-96]		0	1410.77	1.054	0.992321	0	97.4	102.6	36815926	3.22896e+07	5022	Shared	Light	High	Peak Found	High	0.23	0.0001192	0.0006061	1.68	46.06
	TRUE	High	[R].QLFHPEQLITGKEDAANNYAR.[G]		3.39795e-06	9.1126e-05	2	6	6	P68363; Q9BQE3	P68363 [85-105]; Q9BQE3 [85-105]		1	2415.21	0.813	0.159657	0	110.3	89.7	42513924	28744266	5023	Shared	Light	High	Peak Found	High	1.44	0.0001192	1.642e-06	4.66	47.06
	TRUE	High	[R].QLFHPEQLITGKEDAANNYAR.[G]	1xLabel:13C(6)15N(2) [K12]; 1xLabel:13C(6)15N(4) [R21]	2.75177e-06	9.1126e-05	2	6	5	P68363; Q9BQE3	P68363 [85-105]; Q9BQE3 [85-105]		1	2433.23								5023	Redundant	Heavy	Peak Found	High	High	0.35	0.0001192	1.315e-06	3.85	47.06
	TRUE	High	[R].SIQFVDWCPTGFK.[V]	1xCarbamidomethyl [C8]	1.52026e-05	9.1126e-05	1	2	2	P68363	P68363 [340-352]		0	1584.75								5560	Redundant	Light	High	Peak Found	High	-0.48	0.0001192	7.835e-06	3.75	65.44
	TRUE	High	[R].SIQFVDWCPTGFK.[V]	1xCarbamidomethyl [C8]; 1xLabel:13C(6)15N(2) [K13]	2.78028e-05	9.1126e-05	1	2	1	P68363	P68363 [340-352]		0	1592.77	0.97	0.729361	0	101.5	98.5	2.00182e+06	1.61593e+06	5560		Heavy	Peak Found	High	High	0.27	0.0001192	1.459e-05	3.85	65.44
	TRUE	High	[K].TIGGGDDSFNTFFSETGAGK.[H]		2.53527e-09	9.1126e-05	2	5	6	P68363; Q9BQE3	P68363 [41-60]; Q9BQE3 [41-60]		0	2007.89								6087	Redundant	Light	High	Peak Found	High	-0.35	0.0001192	9.019e-10	6.15	60.35
	TRUE	High	[K].TIGGGDDSFNTFFSETGAGK.[H]	1xLabel:13C(6)15N(2) [K20]	1.09045e-09	9.1126e-05	2	5	7	P68363; Q9BQE3	P68363 [41-60]; Q9BQE3 [41-60]		0	2015.91	1.19	0.503624	0	91.3	108.7	3.00785e+07	2.9778e+07	6087	Shared	Heavy	Peak Found	High	High	-0.07	0.0001192	3.747e-10	5.35	60.35
	TRUE	High	[K].TIGGGDDSFNTFFSETGAGKHVPR.[A]		9.50305e-05	9.1126e-05	2	5	1	P68363; Q9BQE3	P68363 [41-64]; Q9BQE3 [41-64]		1	2497.17	0.829	0.194271	0	109.4	90.6	2.39044e+07	16486647	6088	Shared	Light	High	Peak Found	High	0.13	0.0001192	5.282e-05	2.64	52.78
	TRUE	High	[K].TIGGGDDSFNTFFSETGAGKHVPR.[A]	1xLabel:13C(6)15N(2) [K20]; 1xLabel:13C(6)15N(4) [R24]	4.7481e-06	9.1126e-05	2	5	3	P68363; Q9BQE3	P68363 [41-64]; Q9BQE3 [41-64]		1	2515.2								6088	Redundant	Heavy	Peak Found	High	High	0.33	0.0001192	2.321e-06	3.27	52.78
	TRUE	High	[K].VGINYQPPTVVPGGDLAK.[V]		3.68098e-06	9.1126e-05	2	7	4	P68363; Q9BQE3	P68363 [353-370]; Q9BQE3 [353-370]		0	1824.99								6579	Redundant	Light	High	Peak Found	High	0.23	0.0001192	1.779e-06	3.27	51.42
	TRUE	High	[K].VGINYQPPTVVPGGDLAK.[V]	1xLabel:13C(6)15N(2) [K18]	9.07087e-06	9.1126e-05	2	7	3	P68363; Q9BQE3	P68363 [353-370]; Q9BQE3 [353-370]		0	1833	0.757	0.0729952	0	113.8	86.2	8.65952e+07	5.45323e+07	6579	Shared	Heavy	Peak Found	High	High	0.07	0.0001192	4.55e-06	3.77	51.42
TRUE	High	Master Protein	P78527	DNA-dependent protein kinase catalytic subunit OS=Homo sapiens OX=9606 GN=PRKDC PE=1 SV=3	0	217.851	8	24	60	24	4128	468.8	7.12	192.79	24	Pf00454, Pf02259, Pf02260, Pf08163, Pf19704	5591	ENSG00000253729	PRKDC	hsa:5591; P78527; P78528; Q13327; Q13337; Q14175; Q59H99; Q7Z611; Q96SE6; Q9UME3	miRNA regulation of DNA damage response; Cell cycle; Retinoblastoma gene in cancer; Fas ligand pathway and stress induction of heat shock proteins; Pathways affected in adenoid cystic carcinoma; ATM signaling in development and disease ; Non-homologous end joining; Osteoblast differentiation and related diseases; DNA repair pathways, full network; DNA damage response	E3 ubiquitin ligases ubiquitinate target proteins; Cytosolic sensors of pathogen-associated DNA ; Nonhomologous End-Joining (NHEJ); IRF3-mediated induction of type I IFN	Non-homologous end-joining; Cell cycle	16	0	1.112	0.658932	26.42	99.9	100.1	5.56848e+07	4.63908e+07	High	High	1
	Checked	Confidence	Annotated Sequence	Modifications	Qvality PEP	Qvality q-value	# Protein Groups	# Proteins	# PSMs	Master Protein Accessions	Positions in Master Proteins	Modifications in Master Proteins	# Missed Cleavages	Theo. MH+ [Da]	Abundance Ratio: (Heavy) / (Light)	Abundance Ratio P-Value: (Heavy) / (Light)	Abundance Ratio Variability [%]: (Heavy) / (Light)	Abundances (Grouped): Light	Abundances (Grouped): Heavy	Abundance: F2: Light, Sample	Abundance: F2: Heavy, Sample	Precursor Quan Result ID	Quan Info	Quan Channel	Found in Sample: [S2] F2: Light, Sample	Found in Sample: [S4] F2: Heavy, Sample	Confidence (by Search Engine): Sequest HT	DeltaM [ppm] (by Search Engine): Sequest HT	Percolator q-Value (by Search Engine): Sequest HT	Percolator PEP (by Search Engine): Sequest HT	XCorr (by Search Engine): Sequest HT	Top Apex RT [min]
	TRUE	High	[K].AALSALESFLK.[Q]	1xLabel:13C(6)15N(2) [K11]	0.00436705	0.000596234	1	1	1	P78527	P78527 [311-321]		0	1157.67	1.887	0.0161938	0	69.3	130.7	122334	192105	46		Heavy	Peak Found	High	High	-0.34	0.0005035	0.002821	2.48	68.49
	TRUE	High	[R].AQEPESGLSEETQVK.[C]		5.92346e-05	9.1126e-05	1	1	1	P78527	P78527 [4091-4105]		0	1631.78	0.996	0.837109	0	100.2	99.8	4048339	3354304	543		Light	High	Peak Found	High	-0.3	0.0001192	3.212e-05	3.54	22.14
	TRUE	High	[R].AQEPESGLSEETQVK.[C]	1xLabel:13C(6)15N(2) [K15]	2.85369e-06	9.1126e-05	1	1	1	P78527	P78527 [4091-4105]		0	1639.79								543	Redundant	Heavy	Peak Found	High	High	0.28	0.0001192	1.369e-06	3.16	22.14
	TRUE	High	[R].ATQQQHDFTLTQTADGR.[S]		0.000727096	9.1126e-05	1	1	3	P78527	P78527 [2637-2653]		0	1917.9	1.31	0.274041	0	86.6	113.4	5.84461e+06	6.37312e+06	664		Light	High	Peak Found	High	0.23	0.0001192	0.0004379	3.78	22.31
	TRUE	High	[R].ATQQQHDFTLTQTADGR.[S]	1xLabel:13C(6)15N(4) [R17]	4.18301e-07	9.1126e-05	1	1	2	P78527	P78527 [2637-2653]		0	1927.91								664	Redundant	Heavy	Peak Found	High	High	-0.98	0.0001192	1.841e-07	3.91	22.31
	TRUE	High	[K].DLLLNTMSQEEK.[A]		2.78028e-05	9.1126e-05	1	1	1	P78527	P78527 [3814-3825]		0	1420.7								992	Redundant	Light	High	Peak Found	High	0.45	0.0001192	1.464e-05	3.51	47.15
	TRUE	High	[K].DLLLNTMSQEEK.[A]	1xLabel:13C(6)15N(2) [K12]	0.00121683	9.1126e-05	1	1	1	P78527	P78527 [3814-3825]		0	1428.71	1.425	0.185256	0	82.5	117.5	1.06478e+06	1.26279e+06	992		Heavy	Peak Found	High	High	-1.29	0.0001192	0.000748	2.96	47.15
	TRUE	High	[R].DPTVHDDVLELEMDELNR.[H]		0.00406412	0.000477939	1	1	1	P78527	P78527 [2073-2090]		0	2139.99								1076	No Quan Values	Light	High	Not Found	High	-1.96	0.0004125	0.002617	2.96
	TRUE	High	[R].DPTVHDDVLELEMDELNR.[H]	1xLabel:13C(6)15N(4) [R18]	0.00108359	9.1126e-05	1	1	1	P78527	P78527 [2073-2090]		0	2149.99								1076	Redundant	Heavy	Not Found	High	High	2.61	0.0001192	0.0006672	3.12
	TRUE	High	[R].GIFTSEIGTK.[Q]		0.00791784	0.000914196	1	1	1	P78527	P78527 [2941-2950]		0	1052.56	1.254	0.405319	0	88.7	111.3	4430961	4624793	2257		Light	High	Peak Found	High	0.25	0.0008339	0.005245	1.85	35.82
	TRUE	High	[R].GIFTSEIGTK.[Q]	1xLabel:13C(6)15N(2) [K10]	0.0115568	0.00122778	1	1	1	P78527	P78527 [2941-2950]		0	1060.58								2257	Redundant	Heavy	Peak Found	High	High	-0.24	0.001157	0.007749	2.12	35.82
	TRUE	High	[R].HGDLPDIQIK.[H]		0.0279648	0.00166208	1	1	1	P78527	P78527 [2777-2786]		0	1135.61	0.01	1e-17		200		2808479		2554		Light	High	Not Found	High	-0.56	0.001546	0.01945	1.99	31.64
	TRUE	High	[K].HSSLITPLQAVAQRDPIIAK.[Q]		0.00557452	0.000694413	1	1	1	P78527	P78527 [2787-2806]		1	2158.23								2607	No Quan Values	Light	High	Not Found	High	-0.85	0.0005813	0.003639	2.47
	TRUE	High	[R].ILELSGSSSEDSEK.[V]	1xLabel:13C(6)15N(2) [K14]	1.3932e-05	9.1126e-05	1	1	1	P78527	P78527 [3359-3372]		0	1488.72	1.191	0.541523	0	91.3	108.7	854488	847107	3343		Heavy	Peak Found	High	High	0.38	0.0001192	7.119e-06	3.96	24.47
	TRUE	High	[K].LSDFNDITNMLLLK.[M]		0.00273491	0.000364742	1	1	1	P78527	P78527 [3656-3669]		0	1636.86	1.492	0.120321	0	80.2	119.8	45085.5	55988.7	3743		Light	High	Peak Found	High	0.66	0.0003275	0.001738	2.97	79.13
	TRUE	High	[K].LSDFNDITNMLLLK.[M]	1xOxidation [M10]; 1xLabel:13C(6)15N(2) [K14]	0.00939853	0.00102822	1	1	1	P78527	P78527 [3656-3669]		0	1660.87	0.988	0.937208	0	100.6	99.4	189469	155798	3742		Heavy	Peak Found	High	High	0.49	0.0009208	0.006264	3.12	68.24
	TRUE	High	[K].LTPLPEDNSMNVDQDGDPSDR.[M]		3.82883e-05	9.1126e-05	1	1	1	P78527	P78527 [3197-3217]		0	2315.01								3859	Redundant	Light	High	Peak Found	High	1.23	0.0001192	2.051e-05	3.54	40.75
	TRUE	High	[K].LTPLPEDNSMNVDQDGDPSDR.[M]	1xLabel:13C(6)15N(4) [R21]	7.50795e-06	9.1126e-05	1	1	1	P78527	P78527 [3197-3217]		0	2325.02	0.817	0.288112	0	110.1	89.9	1.9517e+06	1327160	3859		Heavy	Peak Found	High	High	-0.23	0.0001192	3.747e-06	3.79	40.75
	TRUE	High	[K].LTPLPEDNSMNVDQDGDPSDR.[M]	1xOxidation [M10]	0.000257304	9.1126e-05	1	1	2	P78527	P78527 [3197-3217]		0	2331	0.775	0.324415	0	112.7	87.3	1.1581e+06	747227	3856		Light	High	Peak Found	High	-1.52	0.0001192	0.0001494	3.5	32.52
	TRUE	High	[K].LTPLPEDNSMNVDQDGDPSDR.[M]	1xOxidation [M10]; 1xLabel:13C(6)15N(4) [R21]	2.11786e-06	9.1126e-05	1	1	1	P78527	P78527 [3197-3217]		0	2341.01								3856	Redundant	Heavy	Peak Found	High	High	-2.07	0.0001192	1.005e-06	4.19	32.52
	TRUE	High	[R].MEVQEQEEDISSLIR.[S]		6.06159e-07	9.1126e-05	1	1	1	P78527	P78527 [3218-3232]		0	1805.86								4302	Redundant	Light	High	Peak Found	High	0.44	0.0001192	2.714e-07	3.17	55.96
	TRUE	High	[R].MEVQEQEEDISSLIR.[S]	1xLabel:13C(6)15N(4) [R15]	0.0113934	0.00122778	1	1	1	P78527	P78527 [3218-3232]		0	1815.87	0.436	0.000311305	0	139.3	60.7	3.96517e+06	1.43872e+06	4302		Heavy	Peak Found	High	High	1.13	0.001157	0.007602	2.35	55.96
	TRUE	High	[R].MEVQEQEEDISSLIR.[S]	1xOxidation [M1]	8.31274e-06	9.1126e-05	1	1	1	P78527	P78527 [3218-3232]		0	1821.85								4303	Redundant	Light	High	Not Found	High	-1.96	0.0001192	4.151e-06	3.05
	TRUE	High	[R].MSTSPEAFLALR.[S]		0.000255441	9.1126e-05	1	1	1	P78527	P78527 [3890-3901]		0	1322.68								4514	Redundant	Light	High	Peak Found	High	0.11	0.0001192	0.0001482	2.43	57.55
	TRUE	High	[R].MSTSPEAFLALR.[S]	1xLabel:13C(6)15N(4) [R12]	0.0172004	0.00149171	1	1	1	P78527	P78527 [3890-3901]		0	1332.69	1.032	0.951617	0	98.4	101.6	2.064e+06	1.77166e+06	4514		Heavy	Peak Found	High	High	-0.69	0.001344	0.01173	2.03	57.55
	TRUE	High	[R].MSTSPEAFLALR.[S]	1xOxidation [M1]	0.0448036	0.00273013	1	1	3	P78527	P78527 [3890-3901]		0	1338.67	0.853	0.53293	0	107.9	92.1	1.46399e+06	1.03932e+06	4515		Light	High	Peak Found	High	0.33	0.002423	0.03188	2.28	52.15
	TRUE	High	[R].NELEIPGQYDGR.[G]		0.00638792	0.000694413	1	1	1	P78527	P78527 [3697-3708]		0	1390.66	1.129	0.711839	0	93.9	106.1	3.88993e+06	3.65393e+06	4641		Light	High	Peak Found	High	0.31	0.0005813	0.004179	2.83	37.45
	TRUE	High	[R].NELEIPGQYDGR.[G]	1xLabel:13C(6)15N(4) [R12]	0.0330633	0.0020598	1	1	1	P78527	P78527 [3697-3708]		0	1400.67								4641	Redundant	Heavy	Peak Found	High	High	-0.1	0.001844	0.02312	2.54	37.45
	TRUE	High	[K].NNWEVSALSR.[A]		0.000113976	9.1126e-05	1	1	1	P78527	P78527 [811-820]		0	1175.58	1.127	0.661324	0	94	106	2.27224e+06	2.13008e+06	4784		Light	High	Peak Found	High	0.04	0.0001192	6.369e-05	2.82	37.14
	TRUE	High	[K].QITQSALLAEAR.[S]		4.88827e-06	9.1126e-05	1	1	1	P78527	P78527 [2951-2962]		0	1300.72	1.234	0.424816	0	89.5	110.5	5292776	5.43676e+06	5070		Light	High	Peak Found	High	0.8	0.0001192	2.402e-06	2.69	36.17
	TRUE	High	[K].QITQSALLAEAR.[S]	1xLabel:13C(6)15N(4) [R12]	0.00191988	0.000224419	1	1	1	P78527	P78527 [2951-2962]		0	1310.73								5070	Redundant	Heavy	Peak Found	High	High	0.17	0.0002185	0.001206	2.82	36.17
	TRUE	High	[K].QYDEALNKQDWVDGEPTEAEK.[D]		0.0196738	0.00149171	1	1	1	P78527	P78527 [2971-2991]		1	2465.11	2.381	0.00155897	0	59.2	140.8	610515	1.20943e+06	5181		Light	High	Peak Found	High	0.07	0.001344	0.01341	2.83	38.1
	TRUE	High	[R].SIGEYDVLR.[G]	1xLabel:13C(6)15N(4) [R9]	0.109257	0.0078031	1	1	1	P78527	P78527 [2932-2940]		0	1061.55	1.331	0.240876	0	85.8	114.2	3.73272e+06	4.13509e+06	5518		Heavy	Peak Found	High	High	0.16	0.006464	0.08276	1.76	37.48
	TRUE	High	[R].SLGPPQGEEDSVPR.[D]		2.07846e-05	9.1126e-05	1	1	1	P78527	P78527 [2107-2120]		0	1467.71	0.723	0.0657306	0	116.1	83.9	5510704	3315568	5521		Light	High	Peak Found	High	-0.99	0.0001192	1.082e-05	3	25.86
	TRUE	High	[R].SLGPPQGEEDSVPR.[D]	1xLabel:13C(6)15N(4) [R14]	4.65958e-05	9.1126e-05	1	1	1	P78527	P78527 [2107-2120]		0	1477.72								5521	Redundant	Heavy	Peak Found	High	High	-0.12	0.0001192	2.511e-05	3.68	25.86
	TRUE	High	[R].STVLTPMFVETQASQGTLQTR.[T]		3.6697e-07	9.1126e-05	1	1	2	P78527	P78527 [2599-2619]		0	2295.16	1.084	0.751576	0	96	104	582496	525442	5807		Light	High	Peak Found	High	-0.84	0.0001192	1.614e-07	4.65	58.87
	TRUE	High	[R].STVLTPMFVETQASQGTLQTR.[T]	1xLabel:13C(6)15N(4) [R21]	2.23786e-07	9.1126e-05	1	1	2	P78527	P78527 [2599-2619]		0	2305.17								5807	Redundant	Heavy	Peak Found	High	High	0.45	0.0001192	9.638e-08	4.59	58.87
	TRUE	High	[R].TVGALQVLGTEAQSSLLK.[A]	1xLabel:13C(6)15N(2) [K18]	4.08783e-05	9.1126e-05	1	1	1	P78527	P78527 [1275-1292]		0	1823.04								6315	No Quan Values	Heavy	Not Found	High	High	-0.16	0.0001192	2.187e-05	3.19
	TRUE	High	[K].TVSLLDENNVSSYLSK.[N]		5.74304e-08	9.1126e-05	1	1	1	P78527	P78527 [3303-3318]		0	1768.9	1.112	0.697851	0	94.7	105.3	1183288	1.09512e+06	6342		Light	High	Peak Found	High	-0.26	0.0001192	2.33e-08	4.24	57.2
	TRUE	High	[R].VTELALTASDR.[Q]		0.000383739	9.1126e-05	1	1	1	P78527	P78527 [914-924]		0	1175.63								6930	Redundant	Light	High	Peak Found	High	0.5	0.0001192	0.0002254	2.77	28.06
	TRUE	High	[R].VTELALTASDR.[Q]	1xLabel:13C(6)15N(4) [R11]	0.00142705	9.1126e-05	1	1	1	P78527	P78527 [914-924]		0	1185.63	0.62	0.0743048	0	123.5	76.5	1.46113e+06	753536	6930		Heavy	Peak Found	High	High	-2.67	0.0001192	0.0008881	2.97
	TRUE	High	[R].YNFPVEVEVPMER.[K]		0.00980962	0.00113965	1	1	1	P78527	P78527 [1988-2000]		0	1608.77	0.999	0.995424	0	100	100	1.13753e+06	945743	7215		Light	High	Peak Found	High	-0.14	0.001005	0.006527	2.37	60.88
	TRUE	High	[R].YNFPVEVEVPMER.[K]	1xOxidation [M11]	0.00322805	0.000477939	1	1	1	P78527	P78527 [1988-2000]		0	1624.77								7216	No Quan Values	Light	High	Not Found	High	0.3	0.0004125	0.002071	2.16
TRUE	High	Master Protein	P63261	Actin, cytoplasmic 2 OS=Homo sapiens OX=9606 GN=ACTG1 PE=1 SV=1	0	217.773	49	14	92	1	375	41.8	5.48	285.93	14	Pf00022	71	ENSG00000184009	ACTG1	A8K7C2; hsa:71; P02571; P14104; P63261; P99022; Q5U032; Q96E67	Arrhythmogenic right ventricular cardiomyopathy; Pathogenic Escherichia coli infection; Common pathways underlying drug addiction; Myometrial relaxation and contraction pathways; Focal adhesion; Fas ligand pathway and stress induction of heat shock proteins; Striated muscle contraction pathway; VEGFA-VEGFR2 signaling pathway; Ebola virus pathway in host; Thermogenesis; Mechanoregulation and patho…	Clathrin-mediated endocytosis; FCGR3A-mediated phagocytosis; Translocation of SLC2A4 (GLUT4) to the plasma membrane; EPHB-mediated forward signaling; EPH-ephrin mediated repulsion of cells; RHO GTPases activate IQGAPs; Signaling by BRAF and RAF1 fusions; Signaling by moderate kinase activity BRAF mutants; Paradoxical activation of RAF signaling by kinase inactive BRAF; Signaling downstream of RAS…	Rap1 signaling pathway; Phagosome; Apoptosis; Hippo signaling pathway; Focal adhesion; Adherens junction; Tight junction; Platelet activation; Neutrophil extracellular trap formation; Leukocyte transendothelial migration; Thermogenesis; Regulation of actin cytoskeleton; Thyroid hormone signaling pathway; Oxytocin signaling pathway; Gastric acid secretion; Amyotrophic lateral sclerosis; Bacterial …	70	0	1.188	0.486661	6.46	90.6	109.4	930145	934041	High	High	1	Met-loss+Acetyl [N-Term]
	Checked	Confidence	Annotated Sequence	Modifications	Qvality PEP	Qvality q-value	# Protein Groups	# Proteins	# PSMs	Master Protein Accessions	Positions in Master Proteins	Modifications in Master Proteins	# Missed Cleavages	Theo. MH+ [Da]	Abundance Ratio: (Heavy) / (Light)	Abundance Ratio P-Value: (Heavy) / (Light)	Abundance Ratio Variability [%]: (Heavy) / (Light)	Abundances (Grouped): Light	Abundances (Grouped): Heavy	Abundance: F2: Light, Sample	Abundance: F2: Heavy, Sample	Precursor Quan Result ID	Quan Info	Quan Channel	Found in Sample: [S2] F2: Light, Sample	Found in Sample: [S4] F2: Heavy, Sample	Confidence (by Search Engine): Sequest HT	DeltaM [ppm] (by Search Engine): Sequest HT	Percolator q-Value (by Search Engine): Sequest HT	Percolator PEP (by Search Engine): Sequest HT	XCorr (by Search Engine): Sequest HT	Top Apex RT [min]
	TRUE	High	[R].AVFPSIVGRPR.[QH]		0.00135651	9.1126e-05	3	9	2	P60709; P68133; P63261	P60709 [29-39]; P68133 [31-41]; P63261 [29-39]		0	1198.71	1	0.780626	0	100	100	137934478	114736827	690	Shared	Light	High	Peak Found	High	0.67	0.0001192	0.000841	2.28	35.39
	TRUE	High	[R].DLTDYLMK.[I]	1xLabel:13C(6)15N(2) [K8]	0.0229749	0.00166208	4	7	1	P60709; P68133; Q562R1; P63261	P60709 [184-191]; P68133 [186-193]; Q562R1 [185-192]; P63261 [184-191]		0	1006.5	1.177	0.542019	0	91.9	108.1	14885393	14577660	1020	Shared	Heavy	Peak Found	High	High	0.12	0.001494	0.01587	2.13	53.88
	TRUE	High	[K].DLYANTVLSGGTTMYPGIADR.[M]		1.15802e-06	9.1126e-05	2	2	3	P60709; P63261	P60709 [292-312]; P63261 [292-312]		0	2215.07								1027	Redundant	Light	High	Peak Found	High	1.05	0.0001192	5.347e-07	4.95	64.71
	TRUE	High	[K].DLYANTVLSGGTTMYPGIADR.[M]	1xLabel:13C(6)15N(4) [R21]	1.96325e-07	9.1126e-05	2	2	2	P60709; P63261	P60709 [292-312]; P63261 [292-312]		0	2225.08	1.01	0.892724	0	99.5	100.5	3.85652e+06	3.24046e+06	1027	Shared	Heavy	Peak Found	High	High	0.84	0.0001192	8.369e-08	4.48	64.71
	TRUE	High	[K].DLYANTVLSGGTTMYPGIADR.[M]	1xOxidation [M14]	2.95937e-06	9.1126e-05	2	2	1	P60709; P63261	P60709 [292-312]; P63261 [292-312]		0	2231.06								1025	Redundant	Light	High	Peak Found	High	-1.79	0.0001192	1.423e-06	4.82	58.64
	TRUE	High	[K].DLYANTVLSGGTTMYPGIADR.[M]	1xOxidation [M14]; 1xLabel:13C(6)15N(4) [R21]	1.07923e-10	9.1126e-05	2	2	1	P60709; P63261	P60709 [292-312]; P63261 [292-312]		0	2241.07	1.037	0.906424	0	98.2	101.8	7.07757e+06	6.10946e+06	1025	Shared	Heavy	Peak Found	High	High	-0.02	0.0001192	3.361e-11	5.65	58.64
	TRUE	High	[K].EITALAPSTMK.[I]		1.24015e-05	9.1126e-05	3	6	5	P60709; P68133; P63261	P60709 [316-326]; P68133 [318-328]; P63261 [316-326]		0	1161.62								1600	Redundant	Light	High	Peak Found	High	-0.09	0.0001192	6.296e-06	2.97	31.19
	TRUE	High	[K].EITALAPSTMK.[I]	1xLabel:13C(6)15N(2) [K11]	0.000172506	9.1126e-05	3	6	2	P60709; P68133; P63261	P60709 [316-326]; P68133 [318-328]; P63261 [316-326]		0	1169.63	1.019	0.862032	0	99.1	100.9	84514976	71667384	1600	Shared	Heavy	Peak Found	High	High	-0.22	0.0001192	9.805e-05	2.67	31.19
	TRUE	High	[K].EITALAPSTMK.[I]	1xOxidation [M10]	0.00252626	0.000224419	3	6	11	P60709; P68133; P63261	P60709 [316-326]; P68133 [318-328]; P63261 [316-326]		0	1177.61								1601	Redundant	Light	High	Peak Found	High	-0.37	0.0002185	0.001608	2.31	25.87
	TRUE	High	[K].EITALAPSTMK.[I]	1xOxidation [M10]; 1xLabel:13C(6)15N(2) [K11]	0.0931901	0.00644445	3	6	1	P60709; P68133; P63261	P60709 [316-326]; P68133 [318-328]; P63261 [316-326]		0	1185.63	1.382	0.13769	0	84	116	2.14828e+07	2.47077e+07	1601	Shared	Heavy	Peak Found	High	High	-1.32	0.005303	0.06965	1.95	22.95
	TRUE	High	[R].HQGVMVGMGQK.[D]	2xOxidation [M5; M8]; 1xLabel:13C(6)15N(2) [K11]	0.0224948	0.00166208	4	7	1	P60709; P68133; Q562R1; P63261	P60709 [40-50]; P68133 [42-52]; Q562R1 [41-51]; P63261 [40-50]		0	1211.58								2597	No Quan Values	Heavy	Not Found	High	High	0.19	0.001494	0.01544	1.97
	TRUE	High	[R].HQGVMVGMGQKDSYVGDEAQSKR.[G]	1xOxidation [M8]	9.20379e-06	9.1126e-05	3	6	1	P60709; P68133; P63261	P60709 [40-62]; P68133 [42-64]; P63261 [40-62]		2	2523.17								2598	Redundant	Light	High	Peak Found	High	0.95	0.0001192	4.638e-06	3.8	16.36
	TRUE	High	[R].HQGVMVGMGQKDSYVGDEAQSKR.[G]	1xOxidation [M8]; 2xLabel:13C(6)15N(2) [K11; K22]; 1xLabel:13C(6)15N(4) [R23]	0.00010911	9.1126e-05	3	6	1	P60709; P68133; P63261	P60709 [40-62]; P68133 [42-64]; P63261 [40-62]		2	2549.21	1.28	0.38034	0	87.7	112.3	584394	622359	2598	Shared	Heavy	Peak Found	High	High	1.22	0.0001192	6.081e-05	4.02	16.36
	TRUE	High	[R].KDLYANTVLSGGTTMYPGIADR.[M]		5.24096e-07	9.1126e-05	2	2	1	P60709; P63261	P60709 [291-312]; P63261 [291-312]		1	2343.16	1.638	0.0434842	0	75.8	124.2	2.21918e+06	3.02495e+06	2635	Shared	Light	High	Peak Found	High	-0.13	0.0001192	2.341e-07	5.14	54.22
	TRUE	High	[R].KDLYANTVLSGGTTMYPGIADR.[M]	1xLabel:13C(6)15N(2) [K1]; 1xLabel:13C(6)15N(4) [R22]	0.0072666	0.000812034	2	2	1	P60709; P63261	P60709 [291-312]; P63261 [291-312]		1	2361.19								2635	Redundant	Heavy	Peak Found	High	High	-0.34	0.0007607	0.004776	3.5	54.22
	TRUE	High	[K].IWHHTFYNELR.[V]		9.72539e-07	9.1126e-05	3	9	8	P60709; P68133; P63261	P60709 [85-95]; P68133 [87-97]; P63261 [85-95]		0	1515.75								3985	Redundant	Light	High	Peak Found	High	0.45	0.0001192	4.453e-07	4.51	40.92
	TRUE	High	[K].IWHHTFYNELR.[V]	1xLabel:13C(6)15N(4) [R11]	5.65367e-06	9.1126e-05	3	9	11	P60709; P68133; P63261	P60709 [85-95]; P68133 [87-97]; P63261 [85-95]		0	1525.76	1.206	0.458207	0	90.7	109.3	3.57377e+07	3.58585e+07	3985	Shared	Heavy	Peak Found	High	High	-0.02	0.0001192	2.778e-06	3.78	40.92
	TRUE	High	[-].MEEEIAALVIDNGSGMCK.[A]	1xCarbamidomethyl [C17]; 1xMet-loss+Acetyl [N-Term]	2.54019e-06	9.1126e-05	1	1	1	P63261	P63261 [1-18]	P63261 1xMet-loss+Acetyl [N-Term]	0	1877.86	1.138	0.62477	0	93.6	106.4	307886	291440	4270		Light	High	Peak Found	High	1	0.0001192	1.206e-06	4.68	79.14
	TRUE	High	[-].MEEEIAALVIDNGSGMCK.[A]	1xCarbamidomethyl [C17]; 1xLabel:13C(6)15N(2) [K18]; 1xMet-loss+Acetyl [N-Term]	2.9077e-07	9.1126e-05	1	1	1	P63261	P63261 [1-18]	P63261 1xMet-loss+Acetyl [N-Term]	0	1885.88								4270	Redundant	Heavy	Peak Found	High	High	1.11	0.0001192	1.268e-07	4.72	79.14
	TRUE	High	[-].MEEEIAALVIDNGSGMCK.[A]	1xCarbamidomethyl [C17]; 1xOxidation [M16]; 1xMet-loss+Acetyl [N-Term]	4.51241e-06	9.1126e-05	1	1	2	P63261	P63261 [1-18]	P63261 1xMet-loss+Acetyl [N-Term]	0	1893.86	1.241	0.439441	0	89.2	110.8	622260	642600	4272		Light	High	Peak Found	High	-1.17	0.0001192	2.198e-06	4.4	73.66
	TRUE	High	[R].MQKEITALAPSTMK.[I]		0.00117353	9.1126e-05	3	6	1	P60709; P68133; P63261	P60709 [313-326]; P68133 [315-328]; P63261 [313-326]		1	1548.81	1.163	0.620264	0	92.5	107.5	3.81867e+06	3.69489e+06	4434	Shared	Light	High	Peak Found	High	-0.52	0.0001192	0.0007207	3.66	30.31
	TRUE	High	[R].MQKEITALAPSTMK.[I]	2xLabel:13C(6)15N(2) [K3; K14]	6.85082e-05	9.1126e-05	3	6	2	P60709; P68133; P63261	P60709 [313-326]; P68133 [315-328]; P63261 [313-326]		1	1564.84								4434	Redundant	Heavy	Peak Found	High	High	0.5	0.0001192	3.758e-05	3.38	30.31
	TRUE	High	[K].QEYDESGPSIVHR.[K]		0.0444977	0.00273013	2	7	1	P60709; P63261	P60709 [360-372]; P63261 [360-372]		0	1516.7	0.97	0.691762	0	101.5	98.5	7043487	5.68474e+06	4968	Shared	Light	High	Peak Found	High	-0.06	0.002423	0.03178	2.34
	TRUE	High	[K].QEYDESGPSIVHR.[K]	1xLabel:13C(6)15N(4) [R13]	0.00780542	0.000914196	2	7	2	P60709; P63261	P60709 [360-372]; P63261 [360-372]		0	1526.71								4968	Redundant	Heavy	Peak Found	High	High	-0.36	0.0008339	0.005138	2.05	20
	TRUE	High	[KR].SYELPDGQVITIGNER.[F]		6.96779e-09	9.1126e-05	4	10	5	P60709; P68133; Q562R1; P63261	P60709 [239-254]; P68133 [241-256]; Q562R1 [240-255]; P63261 [239-254]		0	1790.89	0.956	0.601971	0	102.3	97.7	1.25194e+08	99589341	5861	Shared	Light	High	Peak Found	High	-0.31	0.0001192	2.588e-09	4.56	56.85
	TRUE	High	[KR].SYELPDGQVITIGNER.[F]	1xLabel:13C(6)15N(4) [R16]	5.52095e-09	9.1126e-05	4	10	3	P60709; P68133; Q562R1; P63261	P60709 [239-254]; P68133 [241-256]; Q562R1 [240-255]; P63261 [239-254]		0	1800.9								5861	Redundant	Heavy	Peak Found	High	High	-0.15	0.0001192	2.027e-09	5	56.85
	TRUE	High	[R].TTGIVMDSGDGVTHTVPIYEGYALPHAILR.[L]	1xOxidation [M6]	2.68099e-05	9.1126e-05	2	2	2	P60709; P63261	P60709 [148-177]; P63261 [148-177]		0	3199.61	0.853	0.37892	0	107.9	92.1	2.43966e+06	1.73171e+06	6282	Shared	Light	High	Peak Found	High	-0.35	0.0001192	1.411e-05	5.09	61.42
	TRUE	High	[R].VAPEEHPVLLTEAPLNPK.[A]		5.22489e-08	9.1126e-05	2	2	9	P60709; P63261	P60709 [96-113]; P63261 [96-113]		0	1954.06	0.706	0.0299174	0	117.2	82.8	2.67781e+08	1.57306e+08	6411	Shared	Light	High	Peak Found	High	0.57	0.0001192	2.111e-08	4.24	43.61
	TRUE	High	[R].VAPEEHPVLLTEAPLNPK.[A]	1xLabel:13C(6)15N(2) [K18]	7.8518e-08	9.1126e-05	2	2	3	P60709; P63261	P60709 [96-113]; P63261 [96-113]		0	1962.08								6411	Redundant	Heavy	Peak Found	High	High	0.06	0.0001192	3.238e-08	3.72	43.61
TRUE	High	Master Protein	O00161	Synaptosomal-associated protein 23 OS=Homo sapiens OX=9606 GN=SNAP23 PE=1 SV=1	0	216.977	56	11	59	11	211	23.3	5.01	227.09	11	Pf00835	8773	ENSG00000092531	SNAP23	hsa:8773; O00161; O00162; Q13602; Q6IAE3	Insulin signaling	Translocation of SLC2A4 (GLUT4) to the plasma membrane; RHOA GTPase cycle; CDC42 GTPase cycle; RAC1 GTPase cycle; RHOQ GTPase cycle; ER-Phagosome pathway; RAC3 GTPase cycle; RHOB GTPase cycle; RHOJ GTPase cycle; RHOF GTPase cycle; Neutrophil degranulation; trans-Golgi Network Vesicle Budding	SNARE interactions in vesicular transport; Platelet activation	15	0	1.374	0.0944204	9.62	87.8	112.2	1.18938e+08	1.26383e+08	High	High	1	Acetyl [N-Term]
	Checked	Confidence	Annotated Sequence	Modifications	Qvality PEP	Qvality q-value	# Protein Groups	# Proteins	# PSMs	Master Protein Accessions	Positions in Master Proteins	Modifications in Master Proteins	# Missed Cleavages	Theo. MH+ [Da]	Abundance Ratio: (Heavy) / (Light)	Abundance Ratio P-Value: (Heavy) / (Light)	Abundance Ratio Variability [%]: (Heavy) / (Light)	Abundances (Grouped): Light	Abundances (Grouped): Heavy	Abundance: F2: Light, Sample	Abundance: F2: Heavy, Sample	Precursor Quan Result ID	Quan Info	Quan Channel	Found in Sample: [S2] F2: Light, Sample	Found in Sample: [S4] F2: Heavy, Sample	Confidence (by Search Engine): Sequest HT	DeltaM [ppm] (by Search Engine): Sequest HT	Percolator q-Value (by Search Engine): Sequest HT	Percolator PEP (by Search Engine): Sequest HT	XCorr (by Search Engine): Sequest HT	Top Apex RT [min]
	TRUE	High	[K].DMALNIGNEIDAQNPQIK.[R]		3.30051e-06	9.1126e-05	1	1	1	O00161	O00161 [168-185]		0	1983.98	1.374	0.233464	0	84.2	115.8	1.71567e+06	1.9617e+06	1036		Light	High	Peak Found	High	-0.22	0.0001192	1.586e-06	4.13	55.89
	TRUE	High	[K].DMALNIGNEIDAQNPQIK.[R]	1xLabel:13C(6)15N(2) [K18]	2.99354e-07	9.1126e-05	1	1	1	O00161	O00161 [168-185]		0	1991.99								1036	Redundant	Heavy	Peak Found	High	High	0.43	0.0001192	1.302e-07	4.2	55.89
	TRUE	High	[K].DMALNIGNEIDAQNPQIK.[R]	1xOxidation [M2]	1.55082e-08	9.1126e-05	1	1	1	O00161	O00161 [168-185]		0	1999.98								1037	Redundant	Light	High	Peak Found	High	0.01	0.0001192	5.979e-09	5.15	48.43
	TRUE	High	[K].DMALNIGNEIDAQNPQIK.[R]	1xOxidation [M2]; 1xLabel:13C(6)15N(2) [K18]	2.26113e-06	9.1126e-05	1	1	1	O00161	O00161 [168-185]		0	2007.99	1.301	0.301739	0	86.9	113.1	1.88833e+06	2.04462e+06	1037		Heavy	Peak Found	High	High	0.05	0.0001192	1.071e-06	4.72	48.43
	TRUE	High	[K].DMALNIGNEIDAQNPQIKR.[I]		8.96598e-05	9.1126e-05	1	1	1	O00161	O00161 [168-186]		1	2140.08	1.41	0.234084	0	83	117	660914	775246	1039		Light	High	Peak Found	High	0.84	0.0001192	4.95e-05	3.78	48.98
	TRUE	High	[K].DMALNIGNEIDAQNPQIKR.[I]	1xOxidation [M2]; 1xLabel:13C(6)15N(2) [K18]; 1xLabel:13C(6)15N(4) [R19]	0.0127673	0.00130832	1	1	1	O00161	O00161 [168-186]		1	2174.1	1.176	0.625188	0	91.9	108.1	7.31108e+06	7155398	1040		Heavy	Peak Found	High	High	0.09	0.001212	0.008599	3.04	41.63
	TRUE	High	[R].EDEMEENLTQVGSILGNLK.[D]		1.12826e-05	9.1126e-05	1	1	1	O00161	O00161 [149-167]		0	2119.02	1.508	0.137017	0	79.7	120.3	389834	489293	1322		Light	High	Peak Found	High	2.18	0.0001192	5.701e-06	4.72	76.89
	TRUE	High	[R].EDEMEENLTQVGSILGNLK.[D]	1xLabel:13C(6)15N(2) [K19]	1.05151e-09	9.1126e-05	1	1	2	O00161	O00161 [149-167]		0	2127.04								1322	Redundant	Heavy	Peak Found	High	High	0.1	0.0001192	3.607e-10	4.77	76.89
	TRUE	High	[R].EDEMEENLTQVGSILGNLK.[D]	1xOxidation [M4]	4.4523e-08	9.1126e-05	1	1	3	O00161	O00161 [149-167]		0	2135.02	1.514	0.0917585	0	79.6	120.4	3.23382e+06	4073149	1321		Light	High	Peak Found	High	0.7	0.0001192	1.789e-08	4.83	67.4
	TRUE	High	[R].EDEMEENLTQVGSILGNLK.[D]	1xOxidation [M4]; 1xLabel:13C(6)15N(2) [K19]	3.71206e-08	9.1126e-05	1	1	3	O00161	O00161 [149-167]		0	2143.03								1321	Redundant	Heavy	Peak Found	High	High	1.03	0.0001192	1.48e-08	4.54	67.4
	TRUE	High	[R].IEEGLDQINK.[D]		7.26121e-05	9.1126e-05	1	1	1	O00161	O00161 [55-64]		0	1158.6	1.285	0.301319	0	87.5	112.5	7.69722e+06	8.22987e+06	3001		Light	High	Peak Found	High	0.05	0.0001192	3.989e-05	3.08	24.07
	TRUE	High	[R].IEEGLDQINK.[D]	1xLabel:13C(6)15N(2) [K10]	0.000100723	9.1126e-05	1	1	2	O00161	O00161 [55-64]		0	1166.61								3001	Redundant	Heavy	Peak Found	High	High	-0.19	0.0001192	5.58e-05	3.27	24.07
	TRUE	High	[R].IEEGLDQINKDMR.[E]		0.059981	0.00415845	1	1	1	O00161	O00161 [55-67]		1	1560.77	1.412	0.109266	0	82.9	117.1	19848907	2.33249e+07	3002		Light	High	Peak Found	High	-0.62	0.003498	0.04351	2.82	32.06
	TRUE	High	[R].IEEGLDQINKDMR.[E]	1xLabel:13C(6)15N(2) [K10]; 1xLabel:13C(6)15N(4) [R13]	0.0221801	0.00166208	1	1	2	O00161	O00161 [55-67]		1	1578.79								3002	Redundant	Heavy	Peak Found	High	High	0.63	0.001494	0.01526	2.62	32.09
	TRUE	High	[R].ILGLAIESQDAGIK.[T]		2.58827e-07	9.1126e-05	1	1	3	O00161	O00161 [27-40]		0	1427.81								3360	Redundant	Light	High	Peak Found	High	0.16	0.0001192	1.124e-07	3.89	52.88
	TRUE	High	[R].ILGLAIESQDAGIK.[T]	1xLabel:13C(6)15N(2) [K14]	9.48631e-08	9.1126e-05	1	1	4	O00161	O00161 [27-40]		0	1435.82	1.407	0.114012	0	83.1	116.9	24721388	28938342	3360		Heavy	Peak Found	High	High	-0.12	0.0001192	3.935e-08	4.4	52.88
	TRUE	High	[-].MDNLSSEEIQQR.[A]	1xAcetyl [N-Term]	0.0021243	0.000224419	1	1	1	O00161	O00161 [1-12]	O00161 1xAcetyl [N-Term]	0	1491.67								4244	Redundant	Light	High	Peak Found	High	-0.15	0.0002185	0.001342	2.55	43.61
	TRUE	High	[-].MDNLSSEEIQQR.[A]	1xAcetyl [N-Term]; 1xLabel:13C(6)15N(4) [R12]	0.000264895	9.1126e-05	1	1	2	O00161	O00161 [1-12]	O00161 1xAcetyl [N-Term]	0	1501.68	1.399	0.120773	0	83.4	116.6	15941334	18561826	4244		Heavy	Peak Found	High	High	-1.1	0.0001192	0.0001536	2.75	43.61
	TRUE	High	[K].QPGPVTNGQLQQPTTGAASGGYIK.[R]		1.17005e-05	9.1126e-05	1	1	1	O00161	O00161 [118-141]		0	2370.2	1.075	0.885387	0	96.4	103.6	3.99232e+06	3.57206e+06	5086		Light	High	Peak Found	High	-0.33	0.0001192	5.95e-06	3.24	36.77
	TRUE	High	[K].QPGPVTNGQLQQPTTGAASGGYIK.[R]	1xLabel:13C(6)15N(2) [K24]	1.31596e-07	9.1126e-05	1	1	2	O00161	O00161 [118-141]		0	2378.22								5086	Redundant	Heavy	Peak Found	High	High	0.16	0.0001192	5.53e-08	5.61	36.77
	TRUE	High	[K].QPGPVTNGQLQQPTTGAASGGYIKR.[I]		2.52178e-06	9.1126e-05	1	1	2	O00161	O00161 [118-142]		1	2526.31								5088	Redundant	Light	High	Peak Found	High	-0.15	0.0001192	1.199e-06	4.14	30.57
	TRUE	High	[K].QPGPVTNGQLQQPTTGAASGGYIKR.[I]	1xLabel:13C(6)15N(4) [R25]	0.00797465	0.000914196	1	1	1	O00161	O00161 [118-142]		1	2536.31									No Quan Values		Not Found	Not Found	High	0.18	0.0008339	0.005272	3.09
	TRUE	High	[K].QPGPVTNGQLQQPTTGAASGGYIKR.[I]	1xLabel:13C(6)15N(2) [K24]; 1xLabel:13C(6)15N(4) [R25]	1.42557e-07	9.1126e-05	1	1	2	O00161	O00161 [118-142]		1	2544.33	1.11	0.770367	0	94.8	105.2	28310730	26152176	5088		Heavy	Peak Found	High	High	0.24	0.0001192	6.025e-08	5.41	30.57
	TRUE	High	[K].TTWGDGGENSPCNVVSK.[Q]	1xCarbamidomethyl [C12]	8.31274e-06	9.1126e-05	1	1	1	O00161	O00161 [101-117]		0	1807.79								6297	Redundant	Light	High	Not Found	High	0.76	0.0001192	4.174e-06	3.9
	TRUE	High	[K].TTWGDGGENSPCNVVSK.[Q]	1xCarbamidomethyl [C12]; 1xLabel:13C(6)15N(2) [K17]	9.55556e-08	9.1126e-05	1	1	1	O00161	O00161 [101-117]		0	1815.81								6297	No Quan Values	Heavy	Not Found	High	High	-0.47	0.0001192	3.979e-08	4.79
TRUE	High	Master Protein	Q9BQE3	Tubulin alpha-1C chain OS=Homo sapiens OX=9606 GN=TUBA1C PE=1 SV=1	0	210.196	39	14	99	2	449	49.9	5.1	323.13	14	Pf00091, Pf03953	84790	ENSG00000167553	TUBA1C	hsa:84790; Q9BQE3	Alzheimer's disease and miRNA effects; Pathogenic Escherichia coli infection; Parkin-ubiquitin proteasomal system pathway; VEGFA-VEGFR2 signaling pathway; Alzheimer's disease	Separation of Sister Chromatids; The role of GTSE1 in G2/M progression after G2 checkpoint; COPI-mediated anterograde transport; Resolution of Sister Chromatid Cohesion; Hedgehog 'off' state; HSP90 chaperone cycle for steroid hormone receptors (SHR) in the presence of ligand; RHO GTPases Activate Formins; EML4 and NUDC in mitotic spindle formation; COPI-dependent Golgi-to-ER retrograde traffic; R…	Phagosome; Apoptosis; Tight junction; Gap junction; Alzheimer disease; Parkinson disease; Amyotrophic lateral sclerosis; Huntington disease; Prion disease; Pathways of neurodegeneration; Pathogenic Escherichia coli infection; Salmonella infection	47	0	1.094	0.720997	13.55	97.4	102.6	1.33992e+06	1173863	High	High	1
	Checked	Confidence	Annotated Sequence	Modifications	Qvality PEP	Qvality q-value	# Protein Groups	# Proteins	# PSMs	Master Protein Accessions	Positions in Master Proteins	Modifications in Master Proteins	# Missed Cleavages	Theo. MH+ [Da]	Abundance Ratio: (Heavy) / (Light)	Abundance Ratio P-Value: (Heavy) / (Light)	Abundance Ratio Variability [%]: (Heavy) / (Light)	Abundances (Grouped): Light	Abundances (Grouped): Heavy	Abundance: F2: Light, Sample	Abundance: F2: Heavy, Sample	Precursor Quan Result ID	Quan Info	Quan Channel	Found in Sample: [S2] F2: Light, Sample	Found in Sample: [S4] F2: Heavy, Sample	Confidence (by Search Engine): Sequest HT	DeltaM [ppm] (by Search Engine): Sequest HT	Percolator q-Value (by Search Engine): Sequest HT	Percolator PEP (by Search Engine): Sequest HT	XCorr (by Search Engine): Sequest HT	Top Apex RT [min]
	TRUE	High	[R].AVCMLSNTTAVAEAWAR.[L]	1xCarbamidomethyl [C3]	0.0564566	0.0037862	1	1	1	Q9BQE3	Q9BQE3 [374-390]		0	1850.89	1.199	0.51652	0	91	109	362230	361334	681		Light	High	Peak Found	High	0.81	0.003217	0.04092	3.11	66.95
	TRUE	High	[R].AVCMLSNTTAVAEAWAR.[L]	1xCarbamidomethyl [C3]; 1xLabel:13C(6)15N(4) [R17]	0.0829463	0.00572516	1	1	1	Q9BQE3	Q9BQE3 [374-390]		0	1860.9								681	Redundant	Heavy	Peak Found	High	High	-0.36	0.004753	0.06146	2.53	66.95
	TRUE	High	[R].AVCMLSNTTAVAEAWAR.[L]	1xCarbamidomethyl [C3]; 1xOxidation [M4]; 1xLabel:13C(6)15N(4) [R17]	0.146853	0.00987903	1	1	1	Q9BQE3	Q9BQE3 [374-390]		0	1876.89	0.999	0.977326	0	100.1	99.9	977691	812529	682		Heavy	Peak Found	High	High	0.65	0.007952	0.1134	2.76	59.21
	TRUE	High	[R].AVFVDLEPTVIDEVR.[T]		5.26303e-08	9.1126e-05	2	3	6	P68363; Q9BQE3	P68363 [65-79]; Q9BQE3 [65-79]		0	1701.91	0.991	0.745087	0	100.4	99.6	3.4041e+07	2.80745e+07	693	Shared	Light	High	Peak Found	High	-0.58	0.0001192	2.123e-08	4.85	67.01
	TRUE	High	[R].AVFVDLEPTVIDEVR.[T]	1xLabel:13C(6)15N(4) [R15]	5.4184e-08	9.1126e-05	2	3	6	P68363; Q9BQE3	P68363 [65-79]; Q9BQE3 [65-79]		0	1711.91								693	Redundant	Heavy	Peak Found	High	High	-0.41	0.0001192	2.188e-08	4.58	67.01
	TRUE	High	[K].DVNAAIATIK.[T]		1.35325e-05	9.1126e-05	2	5	4	P68363; Q9BQE3	P68363 [327-336]; Q9BQE3 [327-336]		0	1015.58	1.134	0.682908	0	93.7	106.3	75747352	71487632	1193	Shared	Light	High	Peak Found	High	-0.28	0.0001192	6.918e-06	3.19	33.5
	TRUE	High	[K].DVNAAIATIK.[T]	1xLabel:13C(6)15N(2) [K10]	1.34345e-05	9.1126e-05	2	5	3	P68363; Q9BQE3	P68363 [327-336]; Q9BQE3 [327-336]		0	1023.59								1193	Redundant	Heavy	Peak Found	High	High	0.23	0.0001192	6.845e-06	3.07	33.5
	TRUE	High	[K].DYEEVGADSADGEDEGEEY.[-]		4.55051e-08	9.1126e-05	1	1	1	Q9BQE3	Q9BQE3 [431-449]		0	2078.75									Indistinguishable Channels		Not Found	Not Found	High	-0.65	0.0001192	1.829e-08	5.33	42.78
	TRUE	High	[K].EIIDLVLDR.[I]		0.0103855	0.00122778	2	3	1	P68363; Q9BQE3	P68363 [113-121]; Q9BQE3 [113-121]		0	1085.62	1.013	0.879831	0	99.3	100.7	4.68698e+06	3.95157e+06	1562	Shared	Light	High	Peak Found	High	-0.37	0.001089	0.006923	2.1	60.44
	TRUE	High	[R].LDHKFDLMYAK.[R]		5.94897e-06	9.1126e-05	2	7	2	P68363; Q9BQE3	P68363 [391-401]; Q9BQE3 [391-401]		1	1380.7	1.204	0.463783	0	90.8	109.2	17136282	17165286	2927	Shared	Light	High	Peak Found	High	-0.37	0.0001192	2.943e-06	4.47	33.79
	TRUE	High	[R].LDHKFDLMYAK.[R]	1xOxidation [M8]	0.00178596	0.000224419	2	7	2	P68363; Q9BQE3	P68363 [391-401]; Q9BQE3 [391-401]		1	1396.69	1.222	0.414558	0	90	110	11018602	11207455	2928	Shared	Light	High	Peak Found	High	-0.97	0.0002185	0.00112	2.59	25.87
	TRUE	High	[R].LDHKFDLMYAK.[R]	2xLabel:13C(6)15N(2) [K4; K11]	6.93067e-06	9.1126e-05	2	7	2	P68363; Q9BQE3	P68363 [391-401]; Q9BQE3 [391-401]		1	1396.73								2927	Redundant	Heavy	Peak Found	High	High	-0.21	0.0001192	3.452e-06	4.24	33.79
	TRUE	High	[R].LDHKFDLMYAK.[R]	1xOxidation [M8]; 2xLabel:13C(6)15N(2) [K4; K11]	0.000753966	9.1126e-05	2	7	2	P68363; Q9BQE3	P68363 [391-401]; Q9BQE3 [391-401]		1	1412.72								2928	Redundant	Heavy	Peak Found	High	High	-0.48	0.0001192	0.0004561	2.54	25.87
	TRUE	High	[R].LDHKFDLMYAKR.[A]		1.05677e-05	9.1126e-05	2	7	2	P68363; Q9BQE3	P68363 [391-402]; Q9BQE3 [391-402]		2	1536.8								2930	Redundant	Light	High	Peak Found	High	-0.55	0.0001192	5.339e-06	2.98	29.27
	TRUE	High	[R].LDHKFDLMYAKR.[A]	1xOxidation [M8]	0.00329857	0.000477939	2	7	1	P68363; Q9BQE3	P68363 [391-402]; Q9BQE3 [391-402]		2	1552.79	1.342	0.185914	0	85.4	114.6	10216906	11406582	2929	Shared	Light	High	Peak Found	High	-0.59	0.0004125	0.002117	1.79	22
	TRUE	High	[R].LDHKFDLMYAKR.[A]	2xLabel:13C(6)15N(2) [K4; K11]; 1xLabel:13C(6)15N(4) [R12]	3.31051e-05	9.1126e-05	2	7	2	P68363; Q9BQE3	P68363 [391-402]; Q9BQE3 [391-402]		2	1562.84	1.384	0.135633	0	83.9	116.1	10467143	12055697	2930	Shared	Heavy	Peak Found	High	High	-0.32	0.0001192	1.76e-05	2.84	29.27
	TRUE	High	[R].LDHKFDLMYAKR.[A]	1xOxidation [M8]; 2xLabel:13C(6)15N(2) [K4; K11]; 1xLabel:13C(6)15N(4) [R12]	0.000346622	9.1126e-05	2	7	1	P68363; Q9BQE3	P68363 [391-402]; Q9BQE3 [391-402]		2	1578.83								2929	Redundant	Heavy	Peak Found	High	High	-0.06	0.0001192	0.0002025	1.84	22
	TRUE	High	[R].IHFPLATYAPVISAEK.[A]		1.05798e-07	9.1126e-05	2	6	10	P68363; Q9BQE3	P68363 [265-280]; Q9BQE3 [265-280]		0	1756.96	0.88	0.331439	0	106.4	93.6	3.56115e+07	2.60814e+07	3235	Shared	Light	High	Peak Found	High	0.29	0.0001192	4.402e-08	3.54	60.62
	TRUE	High	[R].IHFPLATYAPVISAEK.[A]	1xLabel:13C(6)15N(2) [K16]	1.23637e-06	9.1126e-05	2	6	7	P68363; Q9BQE3	P68363 [265-280]; Q9BQE3 [265-280]		0	1764.98								3235	Redundant	Heavy	Peak Found	High	High	0.38	0.0001192	5.72e-07	3.86	60.62
	TRUE	High	[R].NLDIERPTYTNLNR.[L]		0.00496984	0.000694413	2	7	1	P68363; Q9BQE3	P68363 [216-229]; Q9BQE3 [216-229]		0	1718.88	0.872	0.306382	0	106.8	93.2	11851374	8597827	4714	Shared	Light	High	Peak Found	High	-0.58	0.0005813	0.003225	2.76	35.73
	TRUE	High	[R].NLDIERPTYTNLNR.[L]	2xLabel:13C(6)15N(4) [R6; R14]	0.0782108	0.00515555	2	7	1	P68363; Q9BQE3	P68363 [216-229]; Q9BQE3 [216-229]		0	1738.9								4714	Redundant	Heavy	Peak Found	High	High	-0.25	0.004323	0.05792	2.54	35.73
	TRUE	High	[R].QLFHPEQLITGK.[E]		0.000993296	9.1126e-05	2	8	3	P68363; Q9BQE3	P68363 [85-96]; Q9BQE3 [85-96]		0	1410.77	1.054	0.992321	0	97.4	102.6	36815926	3.22896e+07	5022	Shared	Light	High	Peak Found	High	0.23	0.0001192	0.0006061	1.68	46.06
	TRUE	High	[R].QLFHPEQLITGKEDAANNYAR.[G]		3.39795e-06	9.1126e-05	2	6	6	P68363; Q9BQE3	P68363 [85-105]; Q9BQE3 [85-105]		1	2415.21	0.813	0.159657	0	110.3	89.7	42513924	28744266	5023	Shared	Light	High	Peak Found	High	1.44	0.0001192	1.642e-06	4.66	47.06
	TRUE	High	[R].QLFHPEQLITGKEDAANNYAR.[G]	1xLabel:13C(6)15N(2) [K12]; 1xLabel:13C(6)15N(4) [R21]	2.75177e-06	9.1126e-05	2	6	5	P68363; Q9BQE3	P68363 [85-105]; Q9BQE3 [85-105]		1	2433.23								5023	Redundant	Heavy	Peak Found	High	High	0.35	0.0001192	1.315e-06	3.85	47.06
	TRUE	High	[K].TIGGGDDSFNTFFSETGAGK.[H]		2.53527e-09	9.1126e-05	2	5	6	P68363; Q9BQE3	P68363 [41-60]; Q9BQE3 [41-60]		0	2007.89								6087	Redundant	Light	High	Peak Found	High	-0.35	0.0001192	9.019e-10	6.15	60.35
	TRUE	High	[K].TIGGGDDSFNTFFSETGAGK.[H]	1xLabel:13C(6)15N(2) [K20]	1.09045e-09	9.1126e-05	2	5	7	P68363; Q9BQE3	P68363 [41-60]; Q9BQE3 [41-60]		0	2015.91	1.19	0.503624	0	91.3	108.7	3.00785e+07	2.9778e+07	6087	Shared	Heavy	Peak Found	High	High	-0.07	0.0001192	3.747e-10	5.35	60.35
	TRUE	High	[K].TIGGGDDSFNTFFSETGAGKHVPR.[A]		9.50305e-05	9.1126e-05	2	5	1	P68363; Q9BQE3	P68363 [41-64]; Q9BQE3 [41-64]		1	2497.17	0.829	0.194271	0	109.4	90.6	2.39044e+07	16486647	6088	Shared	Light	High	Peak Found	High	0.13	0.0001192	5.282e-05	2.64	52.78
	TRUE	High	[K].TIGGGDDSFNTFFSETGAGKHVPR.[A]	1xLabel:13C(6)15N(2) [K20]; 1xLabel:13C(6)15N(4) [R24]	4.7481e-06	9.1126e-05	2	5	3	P68363; Q9BQE3	P68363 [41-64]; Q9BQE3 [41-64]		1	2515.2								6088	Redundant	Heavy	Peak Found	High	High	0.33	0.0001192	2.321e-06	3.27	52.78
	TRUE	High	[K].VGINYQPPTVVPGGDLAK.[V]		3.68098e-06	9.1126e-05	2	7	4	P68363; Q9BQE3	P68363 [353-370]; Q9BQE3 [353-370]		0	1824.99								6579	Redundant	Light	High	Peak Found	High	0.23	0.0001192	1.779e-06	3.27	51.42
	TRUE	High	[K].VGINYQPPTVVPGGDLAK.[V]	1xLabel:13C(6)15N(2) [K18]	9.07087e-06	9.1126e-05	2	7	3	P68363; Q9BQE3	P68363 [353-370]; Q9BQE3 [353-370]		0	1833	0.757	0.0729952	0	113.8	86.2	8.65952e+07	5.45323e+07	6579	Shared	Heavy	Peak Found	High	High	0.07	0.0001192	4.55e-06	3.77	51.42
TRUE	High	Master Protein	P04350	Tubulin beta-4A chain OS=Homo sapiens OX=9606 GN=TUBB4A PE=1 SV=2	0	199.397	37	12	73	1	444	49.6	4.88	244.85	12	Pf00091, Pf03953	10382	ENSG00000104833	TUBB4A	B3KQP4; hsa:10382; P04350; Q969E5	Alzheimer's disease and miRNA effects; Pathogenic Escherichia coli infection; Parkin-ubiquitin proteasomal system pathway; Alzheimer's disease	Recycling pathway of L1; COPI-dependent Golgi-to-ER retrograde traffic; Separation of Sister Chromatids; The role of GTSE1 in G2/M progression after G2 checkpoint; Translocation of SLC2A4 (GLUT4) to the plasma membrane; Microtubule-dependent trafficking of connexons from Golgi to the plasma membrane; Gap junction assembly; MHC class II antigen presentation; Resolution of Sister Chromatid Cohesion…	Phagosome; Gap junction; Alzheimer disease; Parkinson disease; Amyotrophic lateral sclerosis; Huntington disease; Prion disease; Pathways of neurodegeneration; Pathogenic Escherichia coli infection; Salmonella infection	50	0								High	Not Found	1
	Checked	Confidence	Annotated Sequence	Modifications	Qvality PEP	Qvality q-value	# Protein Groups	# Proteins	# PSMs	Master Protein Accessions	Positions in Master Proteins	Modifications in Master Proteins	# Missed Cleavages	Theo. MH+ [Da]	Abundance Ratio: (Heavy) / (Light)	Abundance Ratio P-Value: (Heavy) / (Light)	Abundance Ratio Variability [%]: (Heavy) / (Light)	Abundances (Grouped): Light	Abundances (Grouped): Heavy	Abundance: F2: Light, Sample	Abundance: F2: Heavy, Sample	Precursor Quan Result ID	Quan Info	Quan Channel	Found in Sample: [S2] F2: Light, Sample	Found in Sample: [S4] F2: Heavy, Sample	Confidence (by Search Engine): Sequest HT	DeltaM [ppm] (by Search Engine): Sequest HT	Percolator q-Value (by Search Engine): Sequest HT	Percolator PEP (by Search Engine): Sequest HT	XCorr (by Search Engine): Sequest HT	Top Apex RT [min]
	TRUE	High	[R].ALTVPELTQQMFDAK.[N]		2.27065e-07	9.1126e-05	2	3	5	P04350; P68371	P04350 [283-297]; P68371 [283-297]		0	1691.87								416	Redundant	Light	High	Peak Found	High	0.41	0.0001192	9.783e-08	3.92	66.25
	TRUE	High	[R].ALTVPELTQQMFDAK.[N]	1xLabel:13C(6)15N(2) [K15]	5.20298e-07	9.1126e-05	2	3	2	P04350; P68371	P04350 [283-297]; P68371 [283-297]		0	1699.88	0.953	0.622173	0	102.4	97.6	6.63155e+06	5.25955e+06	416	Shared	Heavy	Peak Found	High	High	-0.36	0.0001192	2.321e-07	3.93	66.25
	TRUE	High	[R].ALTVPELTQQMFDAK.[N]	1xOxidation [M11]	6.46362e-05	9.1126e-05	2	3	1	P04350; P68371	P04350 [283-297]; P68371 [283-297]		0	1707.86								417	Redundant	Light	High	Peak Found	High	-0.13	0.0001192	3.527e-05	3.1	51.93
	TRUE	High	[R].ALTVPELTQQMFDAK.[N]	1xOxidation [M11]; 1xLabel:13C(6)15N(2) [K15]	2.09363e-05	9.1126e-05	2	3	1	P04350; P68371	P04350 [283-297]; P68371 [283-297]		0	1715.88	100	1e-17			200		2.87914e+06	417	Shared	Heavy	Not Found	High	High	0.64	0.0001192	1.087e-05	3.47	51.93
	TRUE	High	[R].AVLVDLEPGTMDSVR.[S]		4.47971e-06	9.1126e-05	2	3	1	P04350; P68371	P04350 [63-77]; P68371 [63-77]		0	1601.82	0.891	0.366899	0	105.7	94.3	14290114	10599301	700	Shared	Light	High	Peak Found	High	0.04	0.0001192	2.186e-06	3.25	54.03
	TRUE	High	[R].AVLVDLEPGTMDSVR.[S]	1xLabel:13C(6)15N(4) [R15]	1.22741e-06	9.1126e-05	2	3	2	P04350; P68371	P04350 [63-77]; P68371 [63-77]		0	1611.83								700	Redundant	Heavy	Peak Found	High	High	0.37	0.0001192	5.668e-07	3.43	54.03
	TRUE	High	[R].AVLVDLEPGTMDSVR.[S]	1xOxidation [M11]	6.10584e-07	9.1126e-05	2	3	2	P04350; P68371	P04350 [63-77]; P68371 [63-77]		0	1617.82	0.912	0.434951	0	104.6	95.4	11208941	8501737	701	Shared	Light	High	Peak Found	High	-0.53	0.0001192	2.737e-07	2.95	45.48
	TRUE	High	[R].AVLVDLEPGTMDSVR.[S]	1xOxidation [M11]; 1xLabel:13C(6)15N(4) [R15]	1.7583e-05	9.1126e-05	2	3	1	P04350; P68371	P04350 [63-77]; P68371 [63-77]		0	1627.82								701	Redundant	Heavy	Peak Found	High	High	-0.05	0.0001192	9.064e-06	3.66	45.48
	TRUE	High	[R].EIVHLQAGQCGNQIGAK.[F]	1xCarbamidomethyl [C10]	0.000619772	9.1126e-05	2	2	1	P04350; P68371	P04350 [3-19]; P68371 [3-19]		0	1822.92								1609	Redundant	Light	High	Peak Found	High	0.3	0.0001192	0.0003705	2.88	25.2
	TRUE	High	[K].EVDEQMLSVQSK.[N]		0.00283532	0.000477939	1	1	1	P04350	P04350 [325-336]		0	1392.67								1784	No Quan Values	Light	High	Not Found	High	2.25	0.0004125	0.001805	2.29
	TRUE	High	[R].FPGQLNADLRK.[L]		0.0503165	0.00320554	5	10	1	P04350; Q9BUF5; P07437; P68371; Q9BVA1	P04350 [242-252]; Q9BUF5 [242-252]; P07437 [242-252]; P68371 [242-252]; Q9BVA1 [242-252]		1	1258.69	0.831	0.277709	0	109.2	90.8	4.60363e+06	3.18391e+06	1946	Shared	Light	High	Peak Found	High	-0.04	0.002713	0.03622	2.47	28.05
	TRUE	High	[R].FPGQLNADLRK.[L]	1xLabel:13C(6)15N(2) [K11]; 1xLabel:13C(6)15N(4) [R10]	0.0175695	0.00149171	5	10	1	P04350; Q9BUF5; P07437; P68371; Q9BVA1	P04350 [242-252]; Q9BUF5 [242-252]; P07437 [242-252]; P68371 [242-252]; Q9BVA1 [242-252]		1	1276.71								1946	Redundant	Heavy	Peak Found	High	High	1.17	0.001344	0.012	2.2	28.05
	TRUE	High	[K].LAVNMVPFPR.[L]		7.95777e-06	9.1126e-05	5	10	2	P04350; Q9BUF5; P07437; P68371; Q9BVA1	P04350 [253-262]; Q9BUF5 [253-262]; P07437 [253-262]; P68371 [253-262]; Q9BVA1 [253-262]		0	1143.63	0.924	0.478691	0	104	96	34044256	26167404	2903	Shared	Light	High	Peak Found	High	-0.1	0.0001192	3.967e-06	3.73	54.03
	TRUE	High	[K].LAVNMVPFPR.[L]	1xLabel:13C(6)15N(4) [R10]	9.82642e-06	9.1126e-05	5	10	2	P04350; Q9BUF5; P07437; P68371; Q9BVA1	P04350 [253-262]; Q9BUF5 [253-262]; P07437 [253-262]; P68371 [253-262]; Q9BVA1 [253-262]		0	1153.64								2903	Redundant	Heavy	Peak Found	High	High	0.04	0.0001192	4.966e-06	3.61	54.03
	TRUE	High	[K].LAVNMVPFPR.[L]	1xOxidation [M5]	1.31445e-05	9.1126e-05	5	10	2	P04350; Q9BUF5; P07437; P68371; Q9BVA1	P04350 [253-262]; Q9BUF5 [253-262]; P07437 [253-262]; P68371 [253-262]; Q9BVA1 [253-262]		0	1159.63								2904	Redundant	Light	High	Peak Found	High	0.43	0.0001192	6.684e-06	3.49	43.93
	TRUE	High	[K].LAVNMVPFPR.[L]	1xOxidation [M5]; 1xLabel:13C(6)15N(4) [R10]	3.07829e-05	9.1126e-05	5	10	2	P04350; Q9BUF5; P07437; P68371; Q9BVA1	P04350 [253-262]; Q9BUF5 [253-262]; P07437 [253-262]; P68371 [253-262]; Q9BVA1 [253-262]		0	1169.64	0.978	0.691914	0	101.1	98.9	25273520	20572971	2904	Shared	Heavy	Peak Found	High	High	-0.27	0.0001192	1.629e-05	3.23	43.93
	TRUE	High	[R].LHFFMPGFAPLTSR.[G]		9.8679e-07	9.1126e-05	5	8	4	P04350; Q9BUF5; P07437; P68371; Q9BVA1	P04350 [263-276]; Q9BUF5 [263-276]; P07437 [263-276]; P68371 [263-276]; Q9BVA1 [263-276]		0	1620.84								3232	Redundant	Light	High	Peak Found	High	0.2	0.0001192	4.512e-07	4.2	70.68
	TRUE	High	[R].LHFFMPGFAPLTSR.[G]	1xLabel:13C(6)15N(4) [R14]	5.53164e-06	9.1126e-05	5	8	3	P04350; Q9BUF5; P07437; P68371; Q9BVA1	P04350 [263-276]; Q9BUF5 [263-276]; P07437 [263-276]; P68371 [263-276]; Q9BVA1 [263-276]		0	1630.84	1.065	0.843389	0	96.9	103.1	2.55908e+06	2.267e+06	3232	Shared	Heavy	Peak Found	High	High	0.26	0.0001192	2.723e-06	4.16	70.68
	TRUE	High	[R].LHFFMPGFAPLTSR.[G]	1xOxidation [M5]	2.67287e-06	9.1126e-05	5	8	2	P04350; Q9BUF5; P07437; P68371; Q9BVA1	P04350 [263-276]; Q9BUF5 [263-276]; P07437 [263-276]; P68371 [263-276]; Q9BVA1 [263-276]		0	1636.83	0.931	0.545837	0	103.6	96.4	7.26984e+06	5.63018e+06	3233	Shared	Light	High	Peak Found	High	0.18	0.0001192	1.274e-06	3.43	61.46
	TRUE	High	[R].LHFFMPGFAPLTSR.[G]	1xOxidation [M5]; 1xLabel:13C(6)15N(4) [R14]	2.30125e-05	9.1126e-05	5	8	5	P04350; Q9BUF5; P07437; P68371; Q9BVA1	P04350 [263-276]; Q9BUF5 [263-276]; P07437 [263-276]; P68371 [263-276]; Q9BVA1 [263-276]		0	1646.84								3233	Redundant	Heavy	Peak Found	High	High	0.34	0.0001192	1.199e-05	3.05	61.46
	TRUE	High	[R].IMNTFSVVPSPK.[V]		1.88519e-06	9.1126e-05	3	4	3	P04350; P07437; P68371	P04350 [163-174]; P07437 [163-174]; P68371 [163-174]		0	1319.7	0.963	0.628037	0	101.9	98.1	46817812	37497300	3523	Shared	Light	High	Peak Found	High	0.41	0.0001192	8.845e-07	3.62	45.09
	TRUE	High	[R].IMNTFSVVPSPK.[V]	1xLabel:13C(6)15N(2) [K12]	2.41409e-06	9.1126e-05	3	4	2	P04350; P07437; P68371	P04350 [163-174]; P07437 [163-174]; P68371 [163-174]		0	1327.72								3523	Redundant	Heavy	Peak Found	High	High	0.66	0.0001192	1.148e-06	4.04	45.09
	TRUE	High	[R].IMNTFSVVPSPK.[V]	1xOxidation [M2]	6.15041e-07	9.1126e-05	3	4	3	P04350; P07437; P68371	P04350 [163-174]; P07437 [163-174]; P68371 [163-174]		0	1335.7	0.95	0.579898	0	102.5	97.5	2.86897e+07	2.26884e+07	3524	Shared	Light	High	Peak Found	High	0.56	0.0001192	2.752e-07	3.61	37.76
	TRUE	High	[R].IMNTFSVVPSPK.[V]	1xOxidation [M2]; 1xLabel:13C(6)15N(2) [K12]	4.61195e-06	9.1126e-05	3	4	4	P04350; P07437; P68371	P04350 [163-174]; P07437 [163-174]; P68371 [163-174]		0	1343.71								3524	Redundant	Heavy	Peak Found	High	High	0.53	0.0001192	2.251e-06	4.06	37.76
	TRUE	High	[R].ISEQFTAMFR.[R]		0.00479458	0.000596234	4	6	1	P04350; P07437; P68371; Q9BVA1	P04350 [381-390]; P07437 [381-390]; P68371 [381-390]; Q9BVA1 [381-390]		0	1229.6	0.01	1e-17		200		1074696		3757	Shared	Light	High	Not Found	High	2.32	0.0005035	0.003103	3.2	53.13
	TRUE	High	[R].ISEQFTAMFR.[R]	1xOxidation [M8]	0.0568386	0.00387987	4	6	1	P04350; P07437; P68371; Q9BVA1	P04350 [381-390]; P07437 [381-390]; P68371 [381-390]; Q9BVA1 [381-390]		0	1245.59	1.252	0.494635	0	88.8	111.2	1.46297e+06	1.52385e+06	3758	Shared	Light	High	Peak Found	High	0.81	0.003217	0.04102	2.24	39.68
	TRUE	High	[K].NSSYFVEWIPNNVK.[TV]		3.91796e-07	9.1126e-05	5	7	4	P04350; Q9BUF5; P07437; P68371; Q9BVA1	P04350 [337-350]; Q9BUF5 [337-350]; P07437 [337-350]; P68371 [337-350]; Q9BVA1 [337-350]		0	1696.83	1.003	0.795889	0	99.8	100.2	2.12191e+07	1.77149e+07	4842	Shared	Light	High	Peak Found	High	-0.41	0.0001192	1.723e-07	4	63.47
	TRUE	High	[K].NSSYFVEWIPNNVK.[TV]	1xLabel:13C(6)15N(2) [K14]	1.1413e-06	9.1126e-05	5	7	2	P04350; Q9BUF5; P07437; P68371; Q9BVA1	P04350 [337-350]; Q9BUF5 [337-350]; P07437 [337-350]; P68371 [337-350]; Q9BVA1 [337-350]		0	1704.85								4842	Redundant	Heavy	Peak Found	High	High	-0.07	0.0001192	5.258e-07	3.56	63.47
	TRUE	High	[R].SGPFGQIFRPDNFVFGQSGAGNNWAK.[G]		2.90207e-10	9.1126e-05	4	5	2	P04350; P07437; P68371; Q9BVA1	P04350 [78-103]; P07437 [78-103]; P68371 [78-103]; Q9BVA1 [78-103]		0	2798.34								5457	Redundant	Light	High	Peak Found	High	-0.15	0.0001192	9.448e-11	6.39	72.29
	TRUE	High	[R].SGPFGQIFRPDNFVFGQSGAGNNWAK.[G]	1xLabel:13C(6)15N(2) [K26]; 1xLabel:13C(6)15N(4) [R9]	4.99209e-11	9.1126e-05	4	5	2	P04350; P07437; P68371; Q9BVA1	P04350 [78-103]; P07437 [78-103]; P68371 [78-103]; Q9BVA1 [78-103]		0	2816.37	0.863	0.61459	0	107.4	92.6	609997	437890	5457	Shared	Heavy	Peak Found	High	High	-0.52	0.0001192	1.51e-11	5.8	72.29
	TRUE	High	[R].YLTVAAVFR.[G]		0.000638035	9.1126e-05	3	3	2	P04350; P07437; P68371	P04350 [310-318]; P07437 [310-318]; P68371 [310-318]		0	1039.59	1.216	0.453005	0	90.2	109.8	4062615	4.1119e+06	7210	Shared	Light	High	Peak Found	High	-0.25	0.0001192	0.0003821	1.97	54.26
	TRUE	High	[R].YLTVAAVFR.[G]	1xLabel:13C(6)15N(4) [R9]	0.0022184	0.000224419	3	3	2	P04350; P07437; P68371	P04350 [310-318]; P07437 [310-318]; P68371 [310-318]		0	1049.6								7210	Redundant	Heavy	Peak Found	High	High	-0.55	0.0002185	0.001404	2.14	54.26
TRUE	High	Master Protein	P07900	Heat shock protein HSP 90-alpha OS=Homo sapiens OX=9606 GN=HSP90AA1 PE=1 SV=5	0	195.06	37	21	70	12	732	84.6	5.02	226.58	21	Pf00183, Pf02518	3320	ENSG00000080824	HSP90AA1	A8K500; B3KPJ9; hsa:3320; P07900; Q2PP14; Q5CAQ6; Q5CAQ7; Q9BVQ5	Nucleotide-binding oligomerization domain (NOD) pathway; TNF-alpha signaling pathway; Corticotropin-releasing hormone signaling pathway; Aryl hydrocarbon receptor Netpath; Ebstein-Barr virus LMP1 signaling; Aryl hydrocarbon receptor pathway; Constitutive androstane receptor pathway; Pregnane X receptor pathway; Glucocorticoid receptor pathway; Nuclear receptors meta-pathway; NRF2 pathway; VEGFA-V…	The role of GTSE1 in G2/M progression after G2 checkpoint; HSP90 chaperone cycle for steroid hormone receptors (SHR) in the presence of ligand; Recruitment of NuMA to mitotic centrosomes; Aggrephagy; Extra-nuclear estrogen signaling; Regulation of actin dynamics for phagocytic cup formation; Neutrophil degranulation; Regulation of necroptotic cell death; Chaperone Mediated Autophagy; VEGFR2 media…	Protein processing in endoplasmic reticulum; PI3K-Akt signaling pathway; Necroptosis; Antigen processing and presentation; NOD-like receptor signaling pathway; IL-17 signaling pathway; Th17 cell differentiation; Progesterone-mediated oocyte maturation; Estrogen signaling pathway; Salmonella infection; Pathways in cancer; Chemical carcinogenesis; Prostate cancer; Lipid and atherosclerosis; Fluid s…	80	0	1.103	0.693944	16.03	97.1	102.9	7.27824e+07	6.41992e+07	High	High	1
	Checked	Confidence	Annotated Sequence	Modifications	Qvality PEP	Qvality q-value	# Protein Groups	# Proteins	# PSMs	Master Protein Accessions	Positions in Master Proteins	Modifications in Master Proteins	# Missed Cleavages	Theo. MH+ [Da]	Abundance Ratio: (Heavy) / (Light)	Abundance Ratio P-Value: (Heavy) / (Light)	Abundance Ratio Variability [%]: (Heavy) / (Light)	Abundances (Grouped): Light	Abundances (Grouped): Heavy	Abundance: F2: Light, Sample	Abundance: F2: Heavy, Sample	Precursor Quan Result ID	Quan Info	Quan Channel	Found in Sample: [S2] F2: Light, Sample	Found in Sample: [S4] F2: Heavy, Sample	Confidence (by Search Engine): Sequest HT	DeltaM [ppm] (by Search Engine): Sequest HT	Percolator q-Value (by Search Engine): Sequest HT	Percolator PEP (by Search Engine): Sequest HT	XCorr (by Search Engine): Sequest HT	Top Apex RT [min]
	TRUE	High	[K].ADLINNLGTIAK.[SF]		2.63427e-06	9.1126e-05	2	4	2	P07900; P08238	P07900 [101-112]; P08238 [96-107]		0	1242.71	1.151	0.626013	0	93	107	60629524	58055184	113	Shared	Light	High	Peak Found	High	-0.14	0.0001192	1.257e-06	3.09	47.31
	TRUE	High	[K].ADLINNLGTIAK.[SF]	1xLabel:13C(6)15N(2) [K12]	8.70894e-05	9.1126e-05	2	4	2	P07900; P08238	P07900 [101-112]; P08238 [96-107]		0	1250.72								113	Redundant	Heavy	Peak Found	High	High	0.03	0.0001192	4.796e-05	3.32	47.31
	TRUE	High	[R].ALLFVPR.[R]		0.00174762	0.000224419	1	1	2	P07900	P07900 [339-345]		0	815.514	1.154	0.615275	0	92.9	107.1	12948686	12433593	368		Light	High	Peak Found	High	0.01	0.0002185	0.001091	1.91	45.1
	TRUE	High	[K].AQALRDNSTMGYMAAK.[K]		0.0061191	0.000694413	1	1	2	P07900	P07900 [616-631]		1	1727.82	1.343	0.232364	0	85.4	114.6	2.27526e+06	2.54207e+06	532		Light	High	Peak Found	High	-0.32	0.0005813	0.004006	2.87	23.65
	TRUE	High	[K].DQVANSAFVER.[L]		0.0732349	0.00489315	1	1	1	P07900	P07900 [500-510]		0	1235.6								1103	Redundant	Light	High	Peak Found	High	4.3	0.00405	0.05366	2.22	24.61
	TRUE	High	[K].DQVANSAFVER.[L]	1xLabel:13C(6)15N(4) [R11]	7.78602e-06	9.1126e-05	1	1	1	P07900	P07900 [500-510]		0	1245.61	1.103	0.832323	0	95.1	104.9	6012511	5.51892e+06	1103		Heavy	Peak Found	High	High	0.27	0.0001192	3.886e-06	4.14	24.61
	TRUE	High	[K].EGLELPEDEEEK.[K]		1.86364e-05	9.1126e-05	2	5	2	P07900; P08238	P07900 [547-558]; P08238 [539-550]		0	1416.64	0.948	0.569756	0	102.7	97.3	34564636	27259810	1474	Shared	Light	High	Peak Found	High	-0.08	0.0001192	9.658e-06	2.6	32.76
	TRUE	High	[K].EGLELPEDEEEK.[K]	1xLabel:13C(6)15N(2) [K12]	2.74013e-05	9.1126e-05	2	5	1	P07900; P08238	P07900 [547-558]; P08238 [539-550]		0	1424.65								1474	Redundant	Heavy	Peak Found	High	High	0.15	0.0001192	1.439e-05	2.66	32.76
	TRUE	High	[R].ELISNSSDALDKIR.[Y]		0.000392196	9.1126e-05	1	1	1	P07900	P07900 [47-60]		1	1560.82								1575	No Quan Values	Light	High	Not Found	High	0.55	0.0001192	0.0002311	3.18
	TRUE	High	[R].GVVDSEDIPLNLSR.[E]		7.8518e-08	9.1126e-05	3	3	2	P07900; P08238; Q12931	P07900 [387-400]; P08238 [379-392]; Q12931 [389-402]		0	1513.79	0.982	0.70621	0	100.9	99.1	42481568	34703472	2506	Shared	Light	High	Peak Found	High	0.6	0.0001192	3.229e-08	4.38	50.1
	TRUE	High	[R].GVVDSEDIPLNLSR.[E]	1xLabel:13C(6)15N(4) [R14]	1.1413e-06	9.1126e-05	3	3	2	P07900; P08238; Q12931	P07900 [387-400]; P08238 [379-392]; Q12931 [389-402]		0	1523.79								2506	Redundant	Heavy	Peak Found	High	High	-0.18	0.0001192	5.238e-07	3.87	50.1
	TRUE	High	[K].HLEINPDHSIIETLR.[Q]	1xLabel:13C(6)15N(4) [R15]	0.00354484	0.000477939	1	1	1	P07900	P07900 [633-647]		0	1796.95	0.01	1e-17		200		2.84086e+06		2576		Heavy	Peak Found	High	High	0.79	0.0004125	0.002282	2.9	49.79
	TRUE	High	[K].HNDDEQYAWESSAGGSFTVR.[TA]		0.00868865	0.000914196	2	3	1	P07900; P08238	P07900 [154-173]; P08238 [149-168]		0	2255.96	0.799	0.50762	0	111.2	88.8	79527.6	52880.5	2584	Shared	Light	High	Peak Found	High	1.18	0.0008339	0.005751	2.83	117.56
	TRUE	High	[K].HNDDEQYAWESSAGGSFTVR.[TA]	1xLabel:13C(6)15N(4) [R20]	0.0121472	0.00122778	2	3	1	P07900; P08238	P07900 [154-173]; P08238 [149-168]		0	2265.97								2584	Redundant	Heavy	Peak Found	High	High	-3.55	0.001157	0.008148	2.45	117.56
	TRUE	High	[K].HSQFIGYPITLFVEK.[KE]		5.34015e-08	9.1126e-05	1	2	4	P07900	P07900 [210-224]		0	1778.95	1.202	0.548526	0	90.8	109.2	1.71551e+06	1715725	2605		Light	High	Peak Found	High	0.11	0.0001192	2.168e-08	3.83	69.42
	TRUE	High	[K].HSQFIGYPITLFVEK.[KE]	1xLabel:13C(6)15N(2) [K15]	4.00439e-07	9.1126e-05	1	2	5	P07900	P07900 [210-224]		0	1786.96								2605	Redundant	Heavy	Peak Found	High	High	0.29	0.0001192	1.76e-07	4.06	69.42
	TRUE	High	[K].KHLEINPDHSIIETLR.[Q]		8.28732e-07	9.1126e-05	1	1	4	P07900	P07900 [632-647]		1	1915.04	1.079	0.892627	0	96.2	103.8	1.2655e+07	1.13579e+07	2676		Light	High	Peak Found	High	-0.23	0.0001192	3.775e-07	4.15	47.15
	TRUE	High	[K].KHLEINPDHSIIETLR.[Q]	1xLabel:13C(6)15N(2) [K1]; 1xLabel:13C(6)15N(4) [R16]	8.68354e-06	9.1126e-05	1	1	2	P07900	P07900 [632-647]		1	1933.06								2676	Redundant	Heavy	Peak Found	High	High	-0.34	0.0001192	4.34e-06	3.89	47.15
	TRUE	High	[K].LGLGIDEDDPTADDTSAAVTEEMPPLEGDDDTSR.[M]		0.000329431	9.1126e-05	1	1	1	P07900	P07900 [694-727]		0	3547.54								3171	Redundant	Light	High	Peak Found	High	-1.72	0.0001192	0.0001928	4.68	66.38
	TRUE	High	[K].LGLGIDEDDPTADDTSAAVTEEMPPLEGDDDTSR.[M]	1xLabel:13C(6)15N(4) [R34]	1.63495e-05	9.1126e-05	1	1	1	P07900	P07900 [694-727]		0	3557.55	0.933	0.822027	0	103.5	96.5	467405	362894	3171		Heavy	Peak Found	High	High	-0.5	0.0001192	8.421e-06	5.11	66.38
	TRUE	High	[K].LGLGIDEDDPTADDTSAAVTEEMPPLEGDDDTSR.[M]	1xOxidation [M23]	7.64042e-05	9.1126e-05	1	1	1	P07900	P07900 [694-727]		0	3563.53	0.01	1e-17		200		748049		3172		Light	High	Not Found	High	-0.64	0.0001192	4.213e-05	5.23	58.5
	TRUE	High	[R].NPDDITNEEYGEFYK.[S]		1.51098e-07	9.1126e-05	1	1	2	P07900	P07900 [300-314]		0	1833.78	0.976	0.681638	0	101.2	98.8	16671952	13536385	4785		Light	High	Peak Found	High	-0.21	0.0001192	6.371e-08	4.22	45.34
	TRUE	High	[R].NPDDITNEEYGEFYK.[S]	1xLabel:13C(6)15N(2) [K15]	3.35268e-08	9.1126e-05	1	1	2	P07900	P07900 [300-314]		0	1841.8								4785	Redundant	Heavy	Peak Found	High	High	-0.22	0.0001192	1.335e-08	4.75	45.34
	TRUE	High	[R].RAPFDLFENR.[K]		0.00155657	9.1126e-05	1	1	2	P07900	P07900 [346-355]		1	1264.64	1.094	0.832224	0	95.5	104.5	9.98249e+06	9.08518e+06	5194		Light	High	Peak Found	High	0.16	0.0001192	0.0009684	3.18	48.42
	TRUE	High	[R].RAPFDLFENR.[K]	2xLabel:13C(6)15N(4) [R1; R10]	0.00400608	0.000477939	1	1	1	P07900	P07900 [346-355]		1	1284.66								5194	Redundant	Heavy	Peak Found	High	High	-0.15	0.0004125	0.002593	3.39	48.42
	TRUE	High	[K].SLTNDWEDHLAVK.[H]		5.31128e-05	9.1126e-05	2	2	2	P07900; P08238	P07900 [315-327]; P08238 [307-319]		0	1527.74	1.081	0.883087	0	96.1	103.9	34407773	3.09494e+07	5570	Shared	Light	High	Peak Found	High	0.07	0.0001192	2.875e-05	3.68	43.88
	TRUE	High	[K].TKPIWTRNPDDITNEEYGEFYK.[S]		0.000272709	9.1126e-05	1	1	2	P07900	P07900 [293-314]		1	2716.29	0.728	0.106285	0	115.7	84.3	2275969	1.37881e+06	6053		Light	High	Peak Found	High	0.37	0.0001192	0.0001578	3.39	52.38
	TRUE	High	[R].TLTIVDTGIGMTK.[A]	1xLabel:13C(6)15N(2) [K13]	8.62061e-06	9.1126e-05	2	3	5	P07900; P08238	P07900 [88-100]; P08238 [83-95]		0	1357.75	1.427	0.0969662	0	82.4	117.6	1.85958e+07	22087583	6136	Shared	Heavy	Peak Found	High	High	0.18	0.0001192	4.338e-06	3.48	50.28
	TRUE	High	[K].VILHLKEDQTEYLEER.[RW]		1.36889e-06	9.1126e-05	2	4	4	P07900; P08238	P07900 [186-201]; P08238 [181-196]		1	2015.04	1.238	0.451616	0	89.4	110.6	3.27946e+06	3.3777e+06	6709	Shared	Light	High	Peak Found	High	-0.27	0.0001192	6.335e-07	3.95	40.93
	TRUE	High	[K].VILHLKEDQTEYLEER.[RW]	1xLabel:13C(6)15N(2) [K6]; 1xLabel:13C(6)15N(4) [R16]	1.69034e-06	9.1126e-05	2	4	2	P07900; P08238	P07900 [186-201]; P08238 [181-196]		1	2033.07								6709	Redundant	Heavy	Peak Found	High	High	-0.15	0.0001192	7.901e-07	3.89	117.86
	TRUE	High	[K].VILHLKEDQTEYLEERR.[IV]		0.00136638	9.1126e-05	2	3	2	P07900; P08238	P07900 [186-202]; P08238 [181-197]		2	2171.15	1.265	0.34342	0	88.3	111.7	218444	229943	6710	Shared	Light	High	Peak Found	High	-0.33	0.0001192	0.000846	2.77	118.33
	TRUE	High	[K].VILHLKEDQTEYLEERR.[IV]	1xLabel:13C(6)15N(2) [K6]; 2xLabel:13C(6)15N(4) [R16; R17]	0.00298207	0.000477939	2	3	1	P07900; P08238	P07900 [186-202]; P08238 [181-197]		2	2199.18								6710	Redundant	Heavy	Peak Found	High	High	0.47	0.0004125	0.001903	2.87	118.33
	TRUE	High	[R].YESLTDPSKLDSGK.[E]		0.0335263	0.0020598	2	4	2	P07900; P08238	P07900 [61-74]; P08238 [56-69]		1	1539.75	1.007	0.811218	0	99.7	100.3	2.92919e+07	24543814	7129	Shared	Light	High	Peak Found	High	-1.17	0.001844	0.02354	2.84	25.49
	TRUE	High	[R].YESLTDPSKLDSGK.[E]	2xLabel:13C(6)15N(2) [K9; K14]	0.00518857	0.000694413	2	4	2	P07900; P08238	P07900 [61-74]; P08238 [56-69]		1	1555.78								7129	Redundant	Heavy	Peak Found	High	High	1	0.0005813	0.00338	3.54	25.46
	TRUE	High	[R].YYTSASGDEMVSLK.[D]		8.1572e-05	9.1126e-05	1	1	1	P07900	P07900 [465-478]		0	1550.7	1.438	0.165359	0	82	118	2.73729e+06	3274365	7297		Light	High	Peak Found	High	-0.51	0.0001192	4.511e-05	2.8	36.95
	TRUE	High	[R].YYTSASGDEMVSLK.[D]	1xLabel:13C(6)15N(2) [K14]	0.000109907	9.1126e-05	1	1	1	P07900	P07900 [465-478]		0	1558.72								7297	Redundant	Heavy	Peak Found	High	High	0.1	0.0001192	6.134e-05	3.54	36.95
	TRUE	High	[R].YYTSASGDEMVSLK.[D]	1xOxidation [M10]	1.98366e-06	9.1126e-05	1	1	2	P07900	P07900 [465-478]		0	1566.7	1.222	0.530822	0	90	110	1.45138e+06	1.47624e+06	7298		Light	High	Peak Found	High	-0.43	0.0001192	9.354e-07	3.19	27.73
	TRUE	High	[R].YYTSASGDEMVSLK.[D]	1xOxidation [M10]; 1xLabel:13C(6)15N(2) [K14]	0.00185172	0.000224419	1	1	1	P07900	P07900 [465-478]		0	1574.71								7298	Redundant	Heavy	Peak Found	High	High	-0.46	0.0002185	0.001165	3.22	27.73
TRUE	High	Master Protein	Q15836	Vesicle-associated membrane protein 3 OS=Homo sapiens OX=9606 GN=VAMP3 PE=1 SV=3	0	193.502	49	6	62	3	100	11.3	8.79	280.85	6	Pf00957	9341	ENSG00000049245	VAMP3	hsa:9341; Q15836; Q9BRV4		RHOA GTPase cycle; CDC42 GTPase cycle; RAC1 GTPase cycle; RHOQ GTPase cycle; ER-Phagosome pathway; RAC3 GTPase cycle; RHOB GTPase cycle; RHOJ GTPase cycle; RHOF GTPase cycle; RHOG GTPase cycle; Retrograde transport at the Trans-Golgi-Network; RHOC GTPase cycle; RHOH GTPase cycle; RAC2 GTPase cycle; RHOD GTPase cycle; Cargo recognition for clathrin-mediated endocytosis	SNARE interactions in vesicular transport; Phagosome	19	4	1.005	0.879475	3.23	101.6	98.4	2.95785e+08	2.38468e+08	High	High	1
	Checked	Confidence	Annotated Sequence	Modifications	Qvality PEP	Qvality q-value	# Protein Groups	# Proteins	# PSMs	Master Protein Accessions	Positions in Master Proteins	Modifications in Master Proteins	# Missed Cleavages	Theo. MH+ [Da]	Abundance Ratio: (Heavy) / (Light)	Abundance Ratio P-Value: (Heavy) / (Light)	Abundance Ratio Variability [%]: (Heavy) / (Light)	Abundances (Grouped): Light	Abundances (Grouped): Heavy	Abundance: F2: Light, Sample	Abundance: F2: Heavy, Sample	Precursor Quan Result ID	Quan Info	Quan Channel	Found in Sample: [S2] F2: Light, Sample	Found in Sample: [S4] F2: Heavy, Sample	Confidence (by Search Engine): Sequest HT	DeltaM [ppm] (by Search Engine): Sequest HT	Percolator q-Value (by Search Engine): Sequest HT	Percolator PEP (by Search Engine): Sequest HT	XCorr (by Search Engine): Sequest HT	Top Apex RT [min]
	TRUE	High	[R].ADALQAGASQFETSAAK.[L]		2.57242e-09	9.1126e-05	2	2	4	Q15836; P63027	Q15836 [50-66]; P63027 [67-83]		0	1665.81	0.918	0.458969	0	104.3	95.7	117867872	90063176	90	Shared	Light	High	Peak Found	High	-0.15	0.0001192	9.197e-10	5.43	36.32
	TRUE	High	[R].ADALQAGASQFETSAAK.[L]	1xLabel:13C(6)15N(2) [K17]	1.44203e-08	9.1126e-05	2	2	3	Q15836; P63027	Q15836 [50-66]; P63027 [67-83]		0	1673.82								90	Redundant	Heavy	Peak Found	High	High	-0.24	0.0001192	5.533e-09	5.53	36.32
	TRUE	High	[R].DQKLSELDDRADALQAGASQFETSAAK.[L]		0.000852953	9.1126e-05	2	2	3	Q15836; P63027	Q15836 [40-66]; P63027 [57-83]		2	2865.39								1086	Redundant	Light	High	Peak Found	High	0.32	0.0001192	0.0005174	3.63	50.89
	TRUE	High	[R].DQKLSELDDRADALQAGASQFETSAAK.[L]	2xLabel:13C(6)15N(2) [K3; K27]; 1xLabel:13C(6)15N(4) [R10]	4.92395e-06	9.1126e-05	2	2	1	Q15836; P63027	Q15836 [40-66]; P63027 [57-83]		2	2891.42	0.603	0.00678679	0	124.8	75.2	6.59687e+06	3309179	1086	Shared	Heavy	Peak Found	High	High	0.49	0.0001192	2.411e-06	4.58	50.89
	TRUE	High	[R].LQQTQNQVDEVVDIMR.[V]		2.70678e-09	9.1126e-05	1	1	7	Q15836	Q15836 [15-30]		0	1915.95	1.025	0.884842	0	98.8	101.2	62098570	5.29396e+07	3688		Light	High	Peak Found	High	0.05	0.0001192	9.682e-10	5.55	55.47
	TRUE	High	[R].LQQTQNQVDEVVDIMR.[V]	1xLabel:13C(6)15N(4) [R16]	9.45722e-09	9.1126e-05	1	1	4	Q15836	Q15836 [15-30]		0	1925.96								3688	Redundant	Heavy	Peak Found	High	High	0.13	0.0001192	3.562e-09	6.09	55.47
	TRUE	High	[R].LQQTQNQVDEVVDIMR.[V]	2xDeamidated [Q2; N6]; 1xLabel:13C(6)15N(4) [R16]	1.01903e-05	9.1126e-05	1	1	1	Q15836	Q15836 [15-30]		0	1927.93	100	1e-17			200		1.19278e+06	3689		Heavy	Not Found	High	High	-0.7	0.0001192	5.15e-06	3.96	56.23
	TRUE	High	[R].LQQTQNQVDEVVDIMR.[V]	1xOxidation [M15]	4.85836e-08	9.1126e-05	1	1	6	Q15836	Q15836 [15-30]		0	1931.95	1.028	0.900892	0	98.6	101.4	44923390	38440730	3686		Light	High	Peak Found	High	0.26	0.0001192	1.963e-08	5.87	39.78
	TRUE	High	[R].LQQTQNQVDEVVDIMR.[V]	1xOxidation [M15]; 1xLabel:13C(6)15N(4) [R16]	8.0588e-09	9.1126e-05	1	1	3	Q15836	Q15836 [15-30]		0	1941.96								3686	Redundant	Heavy	Peak Found	High	High	-0.1	0.0001192	3.007e-09	5.25	39.78
	TRUE	High	[R].LQQTQNQVDEVVDIMRVNVDK.[V]	1xOxidation [M15]; 1xLabel:13C(6)15N(2) [K21]; 1xLabel:13C(6)15N(4) [R16]	0.0412597	0.0026405	1	1	1	Q15836	Q15836 [15-35]		1	2505.27								3690	No Quan Values	Heavy	Not Found	High	High	0.16	0.002359	0.02921	3.82
	TRUE	High	[K].LSELDDRADALQAGASQFETSAAK.[L]		1.15224e-10	9.1126e-05	2	2	6	Q15836; P63027	Q15836 [43-66]; P63027 [60-83]		1	2494.21	1.017	0.85331	0	99.2	100.8	5.82392e+07	4.92852e+07	3752	Shared	Light	High	Peak Found	High	0	0.0001192	3.596e-11	7.69	49
	TRUE	High	[K].LSELDDRADALQAGASQFETSAAK.[L]	1xLabel:13C(6)15N(2) [K24]	0.000460167	9.1126e-05	2	2	1	Q15836; P63027	Q15836 [43-66]; P63027 [60-83]		1	2502.22									Inconsistently Labeled		Not Found	Not Found	High	-0.59	0.0001192	0.0002726	4.21	48.93
	TRUE	High	[K].LSELDDRADALQAGASQFETSAAK.[L]	1xLabel:13C(6)15N(2) [K24]; 1xLabel:13C(6)15N(4) [R7]	8.89528e-10	9.1126e-05	2	2	6	Q15836; P63027	Q15836 [43-66]; P63027 [60-83]		1	2512.23								3752	Redundant	Heavy	Peak Found	High	High	0.17	0.0001192	3.021e-10	7.83	49
	TRUE	High	[R].RLQQTQNQVDEVVDIMR.[V]	1xOxidation [M16]	0.000165143	9.1126e-05	1	1	2	Q15836	Q15836 [14-30]		1	2088.05								5228	Redundant	Light	High	Not Found	High	-0.05	0.0001192	9.357e-05	3.04
	TRUE	High	[R].RLQQTQNQVDEVVDIMR.[V]	2xLabel:13C(6)15N(4) [R1; R17]	8.7725e-05	9.1126e-05	1	1	1	Q15836	Q15836 [14-30]		1	2092.07	0.992	0.8598	0	100.4	99.6	2.18498e+06	1.80393e+06	5227		Heavy	Peak Found	High	High	-0.13	0.0001192	4.861e-05	3.47	51.29
	TRUE	High	[R].RLQQTQNQVDEVVDIMR.[V]	1xOxidation [M16]; 2xLabel:13C(6)15N(4) [R1; R17]	5.54817e-05	9.1126e-05	1	1	1	Q15836	Q15836 [14-30]		1	2108.07								5228	No Quan Values	Heavy	Not Found	High	High	0.57	0.0001192	3.007e-05	3.11
TRUE	High	Master Protein	Q9BVA1	Tubulin beta-2B chain OS=Homo sapiens OX=9606 GN=TUBB2B PE=1 SV=1	0	186.226	39	13	80	2	445	49.9	4.89	267.97	13	Pf00091, Pf03953	347733	ENSG00000137285	TUBB2B	A8K068; hsa:347733; Q9BVA1	Alzheimer's disease and miRNA effects; Pathogenic Escherichia coli infection; Parkin-ubiquitin proteasomal system pathway; Alzheimer's disease	MHC class II antigen presentation; HCMV Early Events; COPI-independent Golgi-to-ER retrograde traffic; HSP90 chaperone cycle for steroid hormone receptors (SHR) in the presence of ligand; Separation of Sister Chromatids; The role of GTSE1 in G2/M progression after G2 checkpoint; Translocation of SLC2A4 (GLUT4) to the plasma membrane; RHO GTPases activate IQGAPs; Formation of tubulin folding inter…	Phagosome; Gap junction; Alzheimer disease; Parkinson disease; Amyotrophic lateral sclerosis; Huntington disease; Prion disease; Pathways of neurodegeneration; Pathogenic Escherichia coli infection; Salmonella infection	44	0	1.035	0.901739	0	98.3	101.7	1.42391e+06	1.22606e+06	High	High	1
	Checked	Confidence	Annotated Sequence	Modifications	Qvality PEP	Qvality q-value	# Protein Groups	# Proteins	# PSMs	Master Protein Accessions	Positions in Master Proteins	Modifications in Master Proteins	# Missed Cleavages	Theo. MH+ [Da]	Abundance Ratio: (Heavy) / (Light)	Abundance Ratio P-Value: (Heavy) / (Light)	Abundance Ratio Variability [%]: (Heavy) / (Light)	Abundances (Grouped): Light	Abundances (Grouped): Heavy	Abundance: F2: Light, Sample	Abundance: F2: Heavy, Sample	Precursor Quan Result ID	Quan Info	Quan Channel	Found in Sample: [S2] F2: Light, Sample	Found in Sample: [S4] F2: Heavy, Sample	Confidence (by Search Engine): Sequest HT	DeltaM [ppm] (by Search Engine): Sequest HT	Percolator q-Value (by Search Engine): Sequest HT	Percolator PEP (by Search Engine): Sequest HT	XCorr (by Search Engine): Sequest HT	Top Apex RT [min]
	TRUE	High	[R].AILVDLEPGTMDSVR.[S]		5.4978e-08	9.1126e-05	2	4	3	P07437; Q9BVA1	P07437 [63-77]; Q9BVA1 [63-77]		0	1615.84	1.043	0.963806	0	97.9	102.1	31015614	26928828	378	Shared	Light	High	Peak Found	High	0.14	0.0001192	2.235e-08	3.75	57.87
	TRUE	High	[R].AILVDLEPGTMDSVR.[S]	1xLabel:13C(6)15N(4) [R15]	4.09272e-07	9.1126e-05	2	4	3	P07437; Q9BVA1	P07437 [63-77]; Q9BVA1 [63-77]		0	1625.84								378	Redundant	Heavy	Peak Found	High	High	0.24	0.0001192	1.8e-07	4.01	57.87
	TRUE	High	[R].AILVDLEPGTMDSVR.[S]	1xOxidation [M11]	6.39778e-06	9.1126e-05	2	4	3	P07437; Q9BVA1	P07437 [63-77]; Q9BVA1 [63-77]		0	1631.83	1.031	0.912755	0	98.5	101.5	26902386	23083666	377	Shared	Light	High	Peak Found	High	0.12	0.0001192	3.175e-06	3.34	49.79
	TRUE	High	[R].AILVDLEPGTMDSVR.[S]	1xOxidation [M11]; 1xLabel:13C(6)15N(4) [R15]	1.32964e-06	9.1126e-05	2	4	4	P07437; Q9BVA1	P07437 [63-77]; Q9BVA1 [63-77]		0	1641.84								377	Redundant	Heavy	Peak Found	High	High	0.14	0.0001192	6.144e-07	3.83	49.79
	TRUE	High	[R].ALTVPELTQQMFDSK.[N]		0.000606418	9.1126e-05	1	2	2	Q9BVA1	Q9BVA1 [283-297]		0	1707.86	1.035	0.940642	0	98.3	101.7	1.42391e+06	1.22606e+06	419		Light	High	Peak Found	High	-1.36	0.0001192	0.0003632	2.54	65.15
	TRUE	High	[R].ALTVPELTQQMFDSK.[N]	1xLabel:13C(6)15N(2) [K15]	0.000516878	9.1126e-05	1	2	2	Q9BVA1	Q9BVA1 [283-297]		0	1715.88								419	Redundant	Heavy	Peak Found	High	High	0.62	0.0001192	0.0003086	2.87	65.15
	TRUE	High	[R].EIVHIQAGQCGNQIGAK.[F]	1xCarbamidomethyl [C10]; 1xLabel:13C(6)15N(2) [K17]	0.000716617	9.1126e-05	2	4	1	P07437; Q9BVA1	P07437 [3-19]; Q9BVA1 [3-19]		0	1830.94	4.236	5.04798e-08	0	38.2	161.8	501122	1.76659e+06	1609	Shared	Heavy	Peak Found	High	High	0.28	0.0001192	0.0004313	3.28	25.2
	TRUE	High	[K].EVDEQMLNVQNK.[N]		4.53143e-07	9.1126e-05	3	4	3	P07437; P68371; Q9BVA1	P07437 [325-336]; P68371 [325-336]; Q9BVA1 [325-336]		0	1446.69								1783	Redundant	Light	High	Peak Found	High	0.03	0.0001192	2.007e-07	4.66	29.12
	TRUE	High	[K].EVDEQMLNVQNK.[N]	1xLabel:13C(6)15N(2) [K12]	7.80893e-05	9.1126e-05	3	4	3	P07437; P68371; Q9BVA1	P07437 [325-336]; P68371 [325-336]; Q9BVA1 [325-336]		0	1454.7	1.14	0.662172	0	93.5	106.5	28536984	27073214	1783	Shared	Heavy	Peak Found	High	High	0.43	0.0001192	4.294e-05	4.03	29.12
	TRUE	High	[K].EVDEQMLNVQNK.[N]	1xOxidation [M6]	0.000112331	9.1126e-05	3	4	8	P07437; P68371; Q9BVA1	P07437 [325-336]; P68371 [325-336]; Q9BVA1 [325-336]		0	1462.68	7.445	1e-17	0	23.7	176.3	849329	5.26164e+06	1782	Shared	Light	High	Peak Found	High	-0.59	0.0001192	6.291e-05	2.47	25.06
	TRUE	High	[K].EVDEQMLNVQNK.[N]	1xOxidation [M6]; 1xLabel:13C(6)15N(2) [K12]	0.000770561	9.1126e-05	3	4	3	P07437; P68371; Q9BVA1	P07437 [325-336]; P68371 [325-336]; Q9BVA1 [325-336]		0	1470.7								1782	Redundant	Heavy	Peak Found	High	High	0.79	0.0001192	0.0004662	3.13	23.85
	TRUE	High	[R].FPGQLNADLRK.[L]		0.0503165	0.00320554	5	10	1	P04350; Q9BUF5; P07437; P68371; Q9BVA1	P04350 [242-252]; Q9BUF5 [242-252]; P07437 [242-252]; P68371 [242-252]; Q9BVA1 [242-252]		1	1258.69	0.831	0.277709	0	109.2	90.8	4.60363e+06	3.18391e+06	1946	Shared	Light	High	Peak Found	High	-0.04	0.002713	0.03622	2.47	28.05
	TRUE	High	[R].FPGQLNADLRK.[L]	1xLabel:13C(6)15N(2) [K11]; 1xLabel:13C(6)15N(4) [R10]	0.0175695	0.00149171	5	10	1	P04350; Q9BUF5; P07437; P68371; Q9BVA1	P04350 [242-252]; Q9BUF5 [242-252]; P07437 [242-252]; P68371 [242-252]; Q9BVA1 [242-252]		1	1276.71								1946	Redundant	Heavy	Peak Found	High	High	1.17	0.001344	0.012	2.2	28.05
	TRUE	High	[K].GHYTEGAELVDSVLDVVR.[K]	1xLabel:13C(6)15N(4) [R18]	7.18736e-06	9.1126e-05	3	5	1	P07437; P68371; Q9BVA1	P07437 [104-121]; P68371 [104-121]; Q9BVA1 [104-121]		0	1968.99	1.539	0.100543	0	78.8	121.2	217735	278749	2217	Shared	Heavy	Peak Found	High	High	-0.22	0.0001192	3.583e-06	3.67	72.65
	TRUE	High	[K].GHYTEGAELVDSVLDVVRK.[E]		3.77354e-05	9.1126e-05	3	5	1	P07437; P68371; Q9BVA1	P07437 [104-122]; P68371 [104-122]; Q9BVA1 [104-122]		1	2087.08	1.15	0.602312	0	93	107	501015	479324	2218	Shared	Light	High	Peak Found	High	0.92	0.0001192	2.007e-05	3.72	68.28
	TRUE	High	[K].GHYTEGAELVDSVLDVVRK.[E]	1xLabel:13C(6)15N(2) [K19]; 1xLabel:13C(6)15N(4) [R18]	0.0299897	0.00196171	3	5	2	P07437; P68371; Q9BVA1	P07437 [104-122]; P68371 [104-122]; Q9BVA1 [104-122]		1	2105.1								2218	Redundant	Heavy	Peak Found	High	High	1.39	0.001771	0.02091	2.87	68.28
	TRUE	High	[K].LAVNMVPFPR.[L]		7.95777e-06	9.1126e-05	5	10	2	P04350; Q9BUF5; P07437; P68371; Q9BVA1	P04350 [253-262]; Q9BUF5 [253-262]; P07437 [253-262]; P68371 [253-262]; Q9BVA1 [253-262]		0	1143.63	0.924	0.478691	0	104	96	34044256	26167404	2903	Shared	Light	High	Peak Found	High	-0.1	0.0001192	3.967e-06	3.73	54.03
	TRUE	High	[K].LAVNMVPFPR.[L]	1xLabel:13C(6)15N(4) [R10]	9.82642e-06	9.1126e-05	5	10	2	P04350; Q9BUF5; P07437; P68371; Q9BVA1	P04350 [253-262]; Q9BUF5 [253-262]; P07437 [253-262]; P68371 [253-262]; Q9BVA1 [253-262]		0	1153.64								2903	Redundant	Heavy	Peak Found	High	High	0.04	0.0001192	4.966e-06	3.61	54.03
	TRUE	High	[K].LAVNMVPFPR.[L]	1xOxidation [M5]	1.31445e-05	9.1126e-05	5	10	2	P04350; Q9BUF5; P07437; P68371; Q9BVA1	P04350 [253-262]; Q9BUF5 [253-262]; P07437 [253-262]; P68371 [253-262]; Q9BVA1 [253-262]		0	1159.63								2904	Redundant	Light	High	Peak Found	High	0.43	0.0001192	6.684e-06	3.49	43.93
	TRUE	High	[K].LAVNMVPFPR.[L]	1xOxidation [M5]; 1xLabel:13C(6)15N(4) [R10]	3.07829e-05	9.1126e-05	5	10	2	P04350; Q9BUF5; P07437; P68371; Q9BVA1	P04350 [253-262]; Q9BUF5 [253-262]; P07437 [253-262]; P68371 [253-262]; Q9BVA1 [253-262]		0	1169.64	0.978	0.691914	0	101.1	98.9	25273520	20572971	2904	Shared	Heavy	Peak Found	High	High	-0.27	0.0001192	1.629e-05	3.23	43.93
	TRUE	High	[R].LHFFMPGFAPLTSR.[G]		9.8679e-07	9.1126e-05	5	8	4	P04350; Q9BUF5; P07437; P68371; Q9BVA1	P04350 [263-276]; Q9BUF5 [263-276]; P07437 [263-276]; P68371 [263-276]; Q9BVA1 [263-276]		0	1620.84								3232	Redundant	Light	High	Peak Found	High	0.2	0.0001192	4.512e-07	4.2	70.68
	TRUE	High	[R].LHFFMPGFAPLTSR.[G]	1xLabel:13C(6)15N(4) [R14]	5.53164e-06	9.1126e-05	5	8	3	P04350; Q9BUF5; P07437; P68371; Q9BVA1	P04350 [263-276]; Q9BUF5 [263-276]; P07437 [263-276]; P68371 [263-276]; Q9BVA1 [263-276]		0	1630.84	1.065	0.843389	0	96.9	103.1	2.55908e+06	2.267e+06	3232	Shared	Heavy	Peak Found	High	High	0.26	0.0001192	2.723e-06	4.16	70.68
	TRUE	High	[R].LHFFMPGFAPLTSR.[G]	1xOxidation [M5]	2.67287e-06	9.1126e-05	5	8	2	P04350; Q9BUF5; P07437; P68371; Q9BVA1	P04350 [263-276]; Q9BUF5 [263-276]; P07437 [263-276]; P68371 [263-276]; Q9BVA1 [263-276]		0	1636.83	0.931	0.545837	0	103.6	96.4	7.26984e+06	5.63018e+06	3233	Shared	Light	High	Peak Found	High	0.18	0.0001192	1.274e-06	3.43	61.46
	TRUE	High	[R].LHFFMPGFAPLTSR.[G]	1xOxidation [M5]; 1xLabel:13C(6)15N(4) [R14]	2.30125e-05	9.1126e-05	5	8	5	P04350; Q9BUF5; P07437; P68371; Q9BVA1	P04350 [263-276]; Q9BUF5 [263-276]; P07437 [263-276]; P68371 [263-276]; Q9BVA1 [263-276]		0	1646.84								3233	Redundant	Heavy	Peak Found	High	High	0.34	0.0001192	1.199e-05	3.05	61.46
	TRUE	High	[R].INVYYNEATGNK.[Y]	1xLabel:13C(6)15N(2) [K12]	0.0454215	0.00282901	1	1	1	Q9BVA1	Q9BVA1 [47-58]		0	1393.68								3580	No Quan Values	Heavy	Not Found	High	High	0.66	0.002498	0.0324	2.54
	TRUE	High	[R].ISEQFTAMFR.[R]		0.00479458	0.000596234	4	6	1	P04350; P07437; P68371; Q9BVA1	P04350 [381-390]; P07437 [381-390]; P68371 [381-390]; Q9BVA1 [381-390]		0	1229.6	0.01	1e-17		200		1074696		3757	Shared	Light	High	Not Found	High	2.32	0.0005035	0.003103	3.2	53.13
	TRUE	High	[R].ISEQFTAMFR.[R]	1xOxidation [M8]	0.0568386	0.00387987	4	6	1	P04350; P07437; P68371; Q9BVA1	P04350 [381-390]; P07437 [381-390]; P68371 [381-390]; Q9BVA1 [381-390]		0	1245.59	1.252	0.494635	0	88.8	111.2	1.46297e+06	1.52385e+06	3758	Shared	Light	High	Peak Found	High	0.81	0.003217	0.04102	2.24	39.68
	TRUE	High	[K].NSSYFVEWIPNNVK.[TV]		3.91796e-07	9.1126e-05	5	7	4	P04350; Q9BUF5; P07437; P68371; Q9BVA1	P04350 [337-350]; Q9BUF5 [337-350]; P07437 [337-350]; P68371 [337-350]; Q9BVA1 [337-350]		0	1696.83	1.003	0.795889	0	99.8	100.2	2.12191e+07	1.77149e+07	4842	Shared	Light	High	Peak Found	High	-0.41	0.0001192	1.723e-07	4	63.47
	TRUE	High	[K].NSSYFVEWIPNNVK.[TV]	1xLabel:13C(6)15N(2) [K14]	1.1413e-06	9.1126e-05	5	7	2	P04350; Q9BUF5; P07437; P68371; Q9BVA1	P04350 [337-350]; Q9BUF5 [337-350]; P07437 [337-350]; P68371 [337-350]; Q9BVA1 [337-350]		0	1704.85								4842	Redundant	Heavy	Peak Found	High	High	-0.07	0.0001192	5.258e-07	3.56	63.47
	TRUE	High	[R].SGPFGQIFRPDNFVFGQSGAGNNWAK.[G]		2.90207e-10	9.1126e-05	4	5	2	P04350; P07437; P68371; Q9BVA1	P04350 [78-103]; P07437 [78-103]; P68371 [78-103]; Q9BVA1 [78-103]		0	2798.34								5457	Redundant	Light	High	Peak Found	High	-0.15	0.0001192	9.448e-11	6.39	72.29
	TRUE	High	[R].SGPFGQIFRPDNFVFGQSGAGNNWAK.[G]	1xLabel:13C(6)15N(2) [K26]; 1xLabel:13C(6)15N(4) [R9]	4.99209e-11	9.1126e-05	4	5	2	P04350; P07437; P68371; Q9BVA1	P04350 [78-103]; P07437 [78-103]; P68371 [78-103]; Q9BVA1 [78-103]		0	2816.37	0.863	0.61459	0	107.4	92.6	609997	437890	5457	Shared	Heavy	Peak Found	High	High	-0.52	0.0001192	1.51e-11	5.8	72.29
TRUE	High	Master Protein	P38646	Stress-70 protein, mitochondrial OS=Homo sapiens OX=9606 GN=HSPA9 PE=1 SV=2	0	184.914	32	15	50	15	679	73.6	6.16	170.75	15	Pf00012	3313	ENSG00000113013	HSPA9	B2RCM1; hsa:3313; P30036; P31932; P38646; Q1HB43; Q53H23; Q6GU03; Q9BWB7; Q9UC56	Parkin-ubiquitin proteasomal system pathway	Mitochondrial protein import; Gene and protein expression by JAK-STAT signaling after Interleukin-12 stimulation; Cristae formation; Regulation of HSF1-mediated heat shock response	RNA degradation; Tuberculosis	7	0	1.166	0.473265	17.48	87.7	112.3	9.32241e+07	9.94145e+07	High	High	1
	Checked	Confidence	Annotated Sequence	Modifications	Qvality PEP	Qvality q-value	# Protein Groups	# Proteins	# PSMs	Master Protein Accessions	Positions in Master Proteins	Modifications in Master Proteins	# Missed Cleavages	Theo. MH+ [Da]	Abundance Ratio: (Heavy) / (Light)	Abundance Ratio P-Value: (Heavy) / (Light)	Abundance Ratio Variability [%]: (Heavy) / (Light)	Abundances (Grouped): Light	Abundances (Grouped): Heavy	Abundance: F2: Light, Sample	Abundance: F2: Heavy, Sample	Precursor Quan Result ID	Quan Info	Quan Channel	Found in Sample: [S2] F2: Light, Sample	Found in Sample: [S4] F2: Heavy, Sample	Confidence (by Search Engine): Sequest HT	DeltaM [ppm] (by Search Engine): Sequest HT	Percolator q-Value (by Search Engine): Sequest HT	Percolator PEP (by Search Engine): Sequest HT	XCorr (by Search Engine): Sequest HT	Top Apex RT [min]
	TRUE	High	[R].AQFEGIVTDLIR.[R]		7.72959e-06	9.1126e-05	1	1	1	P38646	P38646 [349-360]		0	1361.74	1.195	0.485715	0	91.1	108.9	2.12702e+06	2.11527e+06	549		Light	High	Peak Found	High	-0.03	0.0001192	3.87e-06	3.24	65.7
	TRUE	High	[R].AQFEGIVTDLIR.[R]	1xLabel:13C(6)15N(4) [R12]	1.72035e-05	9.1126e-05	1	1	1	P38646	P38646 [349-360]		0	1371.75								549	Redundant	Heavy	Peak Found	High	High	0.44	0.0001192	8.907e-06	2.85	65.7
	TRUE	High	[K].DAGQISGLNVLR.[V]		4.28842e-06	9.1126e-05	1	1	1	P38646	P38646 [207-218]		0	1242.68	1.177	0.541924	0	91.9	108.1	2.03466e+07	1.99264e+07	764		Light	High	Peak Found	High	0.08	0.0001192	2.089e-06	3.34	46.59
	TRUE	High	[K].DAGQISGLNVLR.[V]	1xLabel:13C(6)15N(4) [R12]	0.000182837	9.1126e-05	1	1	2	P38646	P38646 [207-218]		0	1252.69								764	Redundant	Heavy	Peak Found	High	High	0.41	0.0001192	0.0001041	3.33	46.59
	TRUE	High	[K].DAGQISGLNVLR.[V]	2xDeamidated [Q4; N9]; 1xLabel:13C(6)15N(4) [R12]	0.00838377	0.000914196	1	1	2	P38646	P38646 [207-218]		0	1254.66	46.495	1e-17	0	4.2	195.8	368310	1.42495e+07	763		Heavy	Peak Found	High	High	2.54	0.0008339	0.005556	2.94	46.23
	TRUE	High	[R].EQQIVIQSSGGLSK.[D]	1xLabel:13C(6)15N(2) [K14]	1.89095e-05	9.1126e-05	1	1	1	P38646	P38646 [542-555]		0	1481.8	0.981	0.926793	0	101	99	882552	720534	1694		Heavy	Peak Found	High	High	0.65	0.0001192	9.829e-06	2.83	27.96
	TRUE	High	[R].ETGVDLTKDNMALQR.[V]	1xOxidation [M11]	0.0139039	0.00130832	1	1	1	P38646	P38646 [293-307]		1	1706.84								1756	No Quan Values	Light	High	Not Found	High	0.52	0.001212	0.009411	2.26
	TRUE	High	[R].ETGVDLTKDNMALQR.[V]	1xLabel:13C(6)15N(2) [K8]; 1xLabel:13C(6)15N(4) [R15]	0.0154659	0.00130832	1	1	1	P38646	P38646 [293-307]		1	1708.87	1.263	0.360714	0	88.4	111.6	5.71688e+06	6010436	1757		Heavy	Peak Found	High	High	-0.3	0.001212	0.01049	2.04	32.63
	TRUE	High	[K].LLGQFTLIGIPPAPR.[G]		0.076185	0.00506846	1	1	1	P38646	P38646 [499-513]		0	1592.95								3365	Redundant	Light	High	Not Found	High	0.13	0.004189	0.05605	2.08
	TRUE	High	[K].LLGQFTLIGIPPAPR.[G]	1xLabel:13C(6)15N(4) [R15]	0.0451116	0.00282901	1	1	1	P38646	P38646 [499-513]		0	1602.96								3365	No Quan Values	Heavy	Not Found	High	High	0.23	0.002423	0.03221	2.54
	TRUE	High	[K].LYSPSQIGAFVLMK.[M]	1xLabel:13C(6)15N(2) [K14]	0.00106799	9.1126e-05	1	1	1	P38646	P38646 [160-173]		0	1561.85	100	1e-17			200		536638	4024		Heavy	Not Found	High	High	-1.01	0.0001192	0.0006555	3.27	69.93
	TRUE	High	[K].LYSPSQIGAFVLMK.[M]	1xOxidation [M13]	3.91796e-07	9.1126e-05	1	1	1	P38646	P38646 [160-173]		0	1569.83	1.166	0.593993	0	92.3	107.7	1.37798e+06	1.33716e+06	4025		Light	High	Peak Found	High	-0.15	0.0001192	1.721e-07	3.83	64.33
	TRUE	High	[K].LYSPSQIGAFVLMK.[M]	1xOxidation [M13]; 1xLabel:13C(6)15N(2) [K14]	6.68316e-06	9.1126e-05	1	1	2	P38646	P38646 [160-173]		0	1577.85								4025	Redundant	Heavy	Peak Found	High	High	0.29	0.0001192	3.322e-06	3.24	64.46
	TRUE	High	[K].NAVITVPAYFNDSQR.[Q]	1xLabel:13C(6)15N(4) [R15]	2.76013e-05	9.1126e-05	1	1	2	P38646	P38646 [188-202]		0	1704.86	1.015	0.843309	0	99.3	100.7	11430102	9650114	4608		Heavy	Peak Found	High	High	0.29	0.0001192	1.454e-05	3.09	52.36
	TRUE	High	[R].QAVTNPNNTFYATK.[R]		0.000776173	9.1126e-05	1	1	1	P38646	P38646 [108-121]		0	1568.77	0.994	0.781949	0	100.3	99.7	6.90425e+06	5708800	4921		Light	High	Peak Found	High	1.09	0.0001192	0.00047	3.11	25.04
	TRUE	High	[R].QAVTNPNNTFYATK.[R]	1xLabel:13C(6)15N(2) [K14]	3.56025e-05	9.1126e-05	1	1	2	P38646	P38646 [108-121]		0	1576.78								4921	Redundant	Heavy	Peak Found	High	High	-0.25	0.0001192	1.89e-05	3.01	25.04
	TRUE	High	[K].SDIGEVILVGGMTR.[M]		1.03397e-05	9.1126e-05	1	1	1	P38646	P38646 [378-391]		0	1446.76	1.462	0.171065	0	81.2	118.8	809008	983919	5327		Light	High	Peak Found	High	0.88	0.0001192	5.232e-06	3.24	59.07
	TRUE	High	[K].SDIGEVILVGGMTR.[M]	1xOxidation [M12]	0.000147007	9.1126e-05	1	1	1	P38646	P38646 [378-391]		0	1462.76								5328	No Quan Values	Light	High	Not Found	High	0.1	0.0001192	8.331e-05	3.24
	TRUE	High	[K].SQVFSTAADGQTQVEIK.[V]		2.05713e-06	9.1126e-05	1	1	2	P38646	P38646 [469-485]		0	1808.9								5697	Redundant	Light	High	Peak Found	High	-0.3	0.0001192	9.744e-07	4.49	37.25
	TRUE	High	[K].SQVFSTAADGQTQVEIK.[V]	1xLabel:13C(6)15N(2) [K17]	2.59622e-06	9.1126e-05	1	1	2	P38646	P38646 [469-485]		0	1816.92	1.029	0.950072	0	98.6	101.4	2.06153e+06	1764588	5697		Heavy	Peak Found	High	High	-2.2	0.0001192	1.239e-06	4.65	37.25
	TRUE	High	[K].STNGDTFLGGEDFDQALLR.[H]		8.0588e-09	9.1126e-05	1	1	3	P38646	P38646 [266-284]		0	2055.96								5794	Redundant	Light	High	Peak Found	High	0.16	0.0001192	3.007e-09	4.54	66.3
	TRUE	High	[K].STNGDTFLGGEDFDQALLR.[H]	1xLabel:13C(6)15N(4) [R19]	1.21105e-08	9.1126e-05	1	1	3	P38646	P38646 [266-284]		0	2065.97	1.172	0.607283	0	92.1	107.9	5.34636e+06	5.21218e+06	5794		Heavy	Peak Found	High	High	0.39	0.0001192	4.606e-09	5.26	66.3
	TRUE	High	[R].TTPSVVAFTADGER.[L]		3.73491e-06	9.1126e-05	1	1	2	P38646	P38646 [86-99]		0	1450.72								6288	Redundant	Light	High	Peak Found	High	-0.11	0.0001192	1.803e-06	3.43	38.12
	TRUE	High	[R].TTPSVVAFTADGER.[L]	1xLabel:13C(6)15N(4) [R14]	1.83673e-05	9.1126e-05	1	1	2	P38646	P38646 [86-99]		0	1460.73	1.001	0.786475	0	99.9	100.1	15624275	13014799	6288		Heavy	Peak Found	High	High	-0.42	0.0001192	9.539e-06	2.79	38.12
	TRUE	High	[R].VEAVNMAEGIIHDTETK.[M]		0.00354484	0.000477939	1	1	1	P38646	P38646 [579-595]		0	1856.91	1.254	0.406509	0	88.7	111.3	4.74056e+06	4.94594e+06	6465		Light	High	Peak Found	High	-0.06	0.0004125	0.00227	2.4	53.38
	TRUE	High	[R].VEAVNMAEGIIHDTETK.[M]	1xLabel:13C(6)15N(2) [K17]	4.81767e-06	9.1126e-05	1	1	2	P38646	P38646 [579-595]		0	1864.92								6465	Redundant	Heavy	Peak Found	High	High	0.33	0.0001192	2.366e-06	4.08	53.38
	TRUE	High	[R].VINEPTAAALAYGLDK.[S]		1.70985e-07	9.1126e-05	1	1	3	P38646	P38646 [219-234]		0	1645.88								6728	Redundant	Light	High	Peak Found	High	-0.11	0.0001192	7.258e-08	3.72	53.76
	TRUE	High	[R].VINEPTAAALAYGLDK.[S]	1xLabel:13C(6)15N(2) [K16]	4.10996e-08	9.1126e-05	1	1	3	P38646	P38646 [219-234]		0	1653.89	0.904	0.421978	0	105.1	94.9	7747881	5827031	6728		Heavy	Peak Found	High	High	-0.42	0.0001192	1.642e-08	4.16	53.76
	TRUE	High	[K].VQQTVQDLFGR.[A]		0.000327046	9.1126e-05	1	1	1	P38646	P38646 [395-405]		0	1290.68	1.151	0.693084	0	93	107	7.74086e+06	7.41113e+06	6888		Light	High	Peak Found	High	0.89	0.0001192	0.0001914	2.71	42.73
	TRUE	High	[K].VQQTVQDLFGR.[A]	1xLabel:13C(6)15N(4) [R11]	6.0983e-05	9.1126e-05	1	1	1	P38646	P38646 [395-405]		0	1300.69								6888	Redundant	Heavy	Peak Found	High	High	0.35	0.0001192	3.311e-05	2.96	42.73
TRUE	High	Master Protein	P08195	4F2 cell-surface antigen heavy chain OS=Homo sapiens OX=9606 GN=SLC3A2 PE=1 SV=3	0	182.848	35	17	50	17	630	68	5.01	190.21	17	Pf00128, Pf16028	6520	ENSG00000168003	SLC3A2	hsa:6520; P08195; Q13543	Ferroptosis; Proximal tubule transport; Malignant pleural mesothelioma	Amino acid transport across the plasma membrane; Tryptophan catabolism; Basigin interactions; Defective SLC7A7 causes lysinuric protein intolerance (LPI)	mTOR signaling pathway; Ferroptosis; Protein digestion and absorption	10	0	0.959	0.674035	11.36	100.6	99.4	7.78859e+07	6.39877e+07	High	High	1
	Checked	Confidence	Annotated Sequence	Modifications	Qvality PEP	Qvality q-value	# Protein Groups	# Proteins	# PSMs	Master Protein Accessions	Positions in Master Proteins	Modifications in Master Proteins	# Missed Cleavages	Theo. MH+ [Da]	Abundance Ratio: (Heavy) / (Light)	Abundance Ratio P-Value: (Heavy) / (Light)	Abundance Ratio Variability [%]: (Heavy) / (Light)	Abundances (Grouped): Light	Abundances (Grouped): Heavy	Abundance: F2: Light, Sample	Abundance: F2: Heavy, Sample	Precursor Quan Result ID	Quan Info	Quan Channel	Found in Sample: [S2] F2: Light, Sample	Found in Sample: [S4] F2: Heavy, Sample	Confidence (by Search Engine): Sequest HT	DeltaM [ppm] (by Search Engine): Sequest HT	Percolator q-Value (by Search Engine): Sequest HT	Percolator PEP (by Search Engine): Sequest HT	XCorr (by Search Engine): Sequest HT	Top Apex RT [min]
	TRUE	High	[K].ADLLLSTQPGR.[E]	1xLabel:13C(6)15N(4) [R11]	0.000134724	9.1126e-05	1	1	1	P08195	P08195 [593-603]		0	1180.66	1.708	0.0225172	0	73.8	126.2	2877539	4.09089e+06	110		Heavy	Peak Found	High	High	0.76	0.0001192	7.591e-05	2.53	34.5
	TRUE	High	[K].ADLLLSTQPGREEGSPLELER.[L]		0.000559864	9.1126e-05	1	1	1	P08195	P08195 [593-613]		1	2310.19								112	No Quan Values	Light	High	Not Found	High	1.24	0.0001192	0.0003353	3.3
	TRUE	High	[K].DDVAQTDLLQIDPNFGSK.[E]		1.04271e-07	9.1126e-05	1	1	1	P08195	P08195 [270-287]		0	1975.96	1.039	0.88976	0	98.1	101.9	1227629	1.06115e+06	811		Light	High	Peak Found	High	-0.23	0.0001192	4.351e-08	5.4	63.83
	TRUE	High	[K].DDVAQTDLLQIDPNFGSK.[E]	1xDeamidated [Q10]	6.73194e-06	9.1126e-05	1	1	1	P08195	P08195 [270-287]		0	1976.94								812	No Quan Values	Light	High	Not Found	High	4.22	0.0001192	3.334e-06	4.31
	TRUE	High	[K].EDFDSLLQSAK.[K]		0.00769459	0.000914196	1	1	2	P08195	P08195 [288-298]		0	1252.61	0.96	0.644607	0	102.1	97.9	7219989	5.76468e+06	1325		Light	High	Peak Found	High	0.31	0.0008339	0.005067	2	50.61
	TRUE	High	[K].EVELNELEPEKQPMNAASGAAMSLAGAEK.[N]		3.77354e-05	9.1126e-05	1	1	1	P08195	P08195 [112-140]		1	3014.44								1791	Redundant	Light	High	Peak Found	High	-0.77	0.0001192	2.007e-05	5.49	57.09
	TRUE	High	[K].EVELNELEPEKQPMNAASGAAMSLAGAEK.[N]	1xOxidation [M14]	9.77741e-10	9.1126e-05	1	1	1	P08195	P08195 [112-140]		1	3030.44								1786	Redundant	Light	High	Peak Found	High	0.22	0.0001192	3.338e-10	6.6	50.97
	TRUE	High	[K].EVELNELEPEKQPMNAASGAAMSLAGAEK.[N]	2xLabel:13C(6)15N(2) [K11; K29]	4.13527e-06	9.1126e-05	1	1	1	P08195	P08195 [112-140]		1	3030.47	0.716	0.0981109	0	116.6	83.4	2.07111e+06	1.23395e+06	1791		Heavy	Peak Found	High	High	-0.24	0.0001192	2.016e-06	4.81	57.09
	TRUE	High	[K].EVELNELEPEKQPMNAASGAAMSLAGAEK.[N]	2xOxidation [M14; M22]	2.43912e-05	9.1126e-05	1	1	1	P08195	P08195 [112-140]		1	3046.43								1787	Redundant	Light	High	Peak Found	High	-1.87	0.0001192	1.273e-05	4.85	46.83
	TRUE	High	[K].EVELNELEPEKQPMNAASGAAMSLAGAEK.[N]	1xOxidation [M]; 2xLabel:13C(6)15N(2) [K11; K29]	1.9349e-07	9.1126e-05	1	1	2	P08195	P08195 [112-140]		1	3046.47	0.657	0.0617653	0	120.7	79.3	3.69248e+06	2.01954e+06	1786		Heavy	Peak Found	High	High	1.68	0.0001192	8.272e-08	6.61	53
	TRUE	High	[K].EVELNELEPEKQPMNAASGAAMSLAGAEK.[N]	2xOxidation [M14; M22]; 2xLabel:13C(6)15N(2) [K11; K29]	2.84161e-05	9.1126e-05	1	1	1	P08195	P08195 [112-140]		1	3062.46	0.609	0.0195896	0	124.3	75.7	2.19163e+06	1.11022e+06	1787		Heavy	Peak Found	High	High	-2.91	0.0001192	1.494e-05	4.91	46.83
	TRUE	High	[R].GENSWFSTQVDTVATK.[V]		4.54535e-06	9.1126e-05	1	1	1	P08195	P08195 [314-329]		0	1769.83	0.933	0.628921	0	103.5	96.5	1.78293e+06	1.38421e+06	2141		Light	High	Peak Found	High	-0.88	0.0001192	2.217e-06	4.33	50.68
	TRUE	High	[R].GENSWFSTQVDTVATK.[V]	1xLabel:13C(6)15N(2) [K16]	8.07438e-06	9.1126e-05	1	1	1	P08195	P08195 [314-329]		0	1777.85								2141	Redundant	Heavy	Peak Found	High	High	-0.55	0.0001192	4.052e-06	4.09	50.68
	TRUE	High	[K].GQSEDPGSLLSLFR.[R]		2.24474e-06	9.1126e-05	1	1	3	P08195	P08195 [511-524]		0	1505.76	0.9	0.496332	0	105.3	94.7	4701224	3.5206e+06	2384		Light	High	Peak Found	High	-0.72	0.0001192	1.067e-06	4.07	71.12
	TRUE	High	[K].GQSEDPGSLLSLFR.[R]	1xLabel:13C(6)15N(4) [R14]	1.1872e-05	9.1126e-05	1	1	2	P08195	P08195 [511-524]		0	1515.77								2384	Redundant	Heavy	Peak Found	High	High	-0.2	0.0001192	6.046e-06	3.9	71.12
	TRUE	High	[R].LDYLSSLK.[V]		0.0856864	0.00598494	1	1	1	P08195	P08195 [248-255]		0	938.519	1.344	0.25011	0	85.3	114.7	6.24945e+06	6991331	2977		Light	High	Peak Found	High	-0.4	0.004948	0.06365	1.51	40.93
	TRUE	High	[R].IGDLQAFQGHGAGNLAGLK.[G]		1.67809e-06	9.1126e-05	1	1	2	P08195	P08195 [227-245]		0	1866.98	1.192	0.496579	0	91.2	108.8	11860404	11765861	3121		Light	High	Peak Found	High	0.08	0.0001192	7.872e-07	3.96	47.78
	TRUE	High	[R].IGDLQAFQGHGAGNLAGLK.[G]	1xLabel:13C(6)15N(2) [K19]	0.00380936	0.000477939	1	1	2	P08195	P08195 [227-245]		0	1875								3121	Redundant	Heavy	Peak Found	High	High	-0.44	0.0004125	0.002449	3	47.78
	TRUE	High	[R].IGDLQAFQGHGAGNLAGLKGR.[L]		0.0415446	0.0026405	1	1	1	P08195	P08195 [227-247]		1	2080.1								3122	Redundant	Light	High	Peak Found	High	0.06	0.002359	0.02957	2.03	42.37
	TRUE	High	[R].IGDLQAFQGHGAGNLAGLKGR.[L]	1xLabel:13C(6)15N(2) [K19]; 1xLabel:13C(6)15N(4) [R21]	0.105196	0.00744907	1	1	1	P08195	P08195 [227-247]		1	2098.13	0.994	0.928483	0	100.3	99.7	2.91127e+06	2.4074e+06	3122		Heavy	Peak Found	High	High	0.41	0.006124	0.07912	1.94	42.37
	TRUE	High	[R].LKLEPHEGLLLR.[F]		1.10391e-05	9.1126e-05	1	1	2	P08195	P08195 [614-625]		1	1417.85	0.998	0.788167	0	100.1	99.9	5.50571e+06	4.5703e+06	3266		Light	High	Peak Found	High	-0.16	0.0001192	5.592e-06	2.63	41.4
	TRUE	High	[R].LKLEPHEGLLLR.[F]	1xLabel:13C(6)15N(2) [K2]; 1xLabel:13C(6)15N(4) [R12]	0.0950019	0.00653806	1	1	1	P08195	P08195 [614-625]		1	1435.88								3266	Redundant	Heavy	Peak Found	High	High	0.27	0.005368	0.07086	2.17	41.4
	TRUE	High	[K].IKVAEDEAEAAAAAK.[F]		1.24157e-07	9.1126e-05	1	1	4	P08195	P08195 [146-160]		1	1486.77	0.959	0.614623	0	102.1	97.9	16540959	13201815	3276		Light	High	Peak Found	High	-0.13	0.0001192	5.204e-08	3.87	22.26
	TRUE	High	[K].IKVAEDEAEAAAAAK.[F]	2xLabel:13C(6)15N(2) [K2; K15]	1.37466e-07	9.1126e-05	1	1	2	P08195	P08195 [146-160]		1	1502.8								3276	Redundant	Heavy	Peak Found	High	High	-0.26	0.0001192	5.778e-08	4.41	22.26
	TRUE	High	[R].LLTSFLPAQLLR.[L]		0.0591808	0.00407232	1	1	1	P08195	P08195 [440-451]		0	1371.84	0.01	1e-17		200		166725		3481		Light	High	Not Found	High	0.66	0.003434	0.04284	2.14	75.17
	TRUE	High	[K].NAEVTGTMSQDTEVDMK.[E]	1xOxidation [M8]; 1xLabel:13C(6)15N(2) [K17]	0.000121685	9.1126e-05	1	1	1	P08195	P08195 [95-111]		0	1879.81								4585	No Quan Values	Heavy	Not Found	High	High	-0.02	0.0001192	6.802e-05	3.4
	TRUE	High	[K].NQKDDVAQTDLLQIDPNFGSK.[E]		0.0131356	0.00130832	1	1	1	P08195	P08195 [267-287]		1	2346.16	0.01	1e-17		200		2.31042e+06		4804		Light	High	Not Found	High	-0.43	0.001212	0.008819	3.77	54.19
	TRUE	High	[K].VKGLVLGPIHK.[N]		0.00178596	0.000224419	1	1	1	P08195	P08195 [256-266]		1	1160.75								6632	Redundant	Light	High	Peak Found	High	-0.05	0.0002185	0.00112	1.83	23.9
	TRUE	High	[K].VKGLVLGPIHK.[N]	2xLabel:13C(6)15N(2) [K2; K11]	0.000128973	9.1126e-05	1	1	1	P08195	P08195 [256-266]		1	1176.78	0.912	0.72228	0	104.6	95.4	783562	594927	6632		Heavy	Peak Found	High	High	-0.58	0.0001192	7.229e-05	2.47	23.9
	TRUE	High	[R].VILDLTPNYR.[G]	1xLabel:13C(6)15N(4) [R10]	0.000589058	9.1126e-05	1	1	1	P08195	P08195 [304-313]		0	1213.68	0.886	0.399601	0	106	94	5.79287e+06	4.27083e+06	6705		Heavy	Peak Found	High	High	0.3	0.0001192	0.0003526	2.53	47.85
TRUE	High	Master Protein	P78310	Coxsackievirus and adenovirus receptor OS=Homo sapiens OX=9606 GN=CXADR PE=1 SV=1	0	166.326	28	7	45	7	365	40	7.56	180.65	7	Pf00047, Pf07686	1525	ENSG00000154639	CXADR	B2R8V8; B7WPI3; D3YHP0; hsa:1525; O00694; P78310; Q8WWT6; Q8WWT7; Q8WWT8; Q9UKV4	Acute viral myocarditis	Immunoregulatory interactions between a Lymphoid and a non-Lymphoid cell; Cell surface interactions at the vascular wall	Viral myocarditis	4	0	0.868	0.316301	13.54	110.5	89.5	1.67669e+08	1.13054e+08	High	High	1
	Checked	Confidence	Annotated Sequence	Modifications	Qvality PEP	Qvality q-value	# Protein Groups	# Proteins	# PSMs	Master Protein Accessions	Positions in Master Proteins	Modifications in Master Proteins	# Missed Cleavages	Theo. MH+ [Da]	Abundance Ratio: (Heavy) / (Light)	Abundance Ratio P-Value: (Heavy) / (Light)	Abundance Ratio Variability [%]: (Heavy) / (Light)	Abundances (Grouped): Light	Abundances (Grouped): Heavy	Abundance: F2: Light, Sample	Abundance: F2: Heavy, Sample	Precursor Quan Result ID	Quan Info	Quan Channel	Found in Sample: [S2] F2: Light, Sample	Found in Sample: [S4] F2: Heavy, Sample	Confidence (by Search Engine): Sequest HT	DeltaM [ppm] (by Search Engine): Sequest HT	Percolator q-Value (by Search Engine): Sequest HT	Percolator PEP (by Search Engine): Sequest HT	XCorr (by Search Engine): Sequest HT	Top Apex RT [min]
	TRUE	High	[K].EGSLPLQYEWQK.[L]		2.96835e-05	9.1126e-05	1	1	1	P78310	P78310 [166-177]		0	1477.73	0.866	0.289758	0	107.2	92.8	24591470	17723370	1496		Light	High	Peak Found	High	-0.1	0.0001192	1.563e-05	3.36	49.31
	TRUE	High	[K].EGSLPLQYEWQK.[L]	1xLabel:13C(6)15N(2) [K12]	3.12339e-05	9.1126e-05	1	1	1	P78310	P78310 [166-177]		0	1485.75								1496	Redundant	Heavy	Peak Found	High	High	0.28	0.0001192	1.648e-05	4.25	49.31
	TRUE	High	[R].MGAIPVMIPAQSK.[D]		0.0096019	0.00102822	1	1	2	P78310	P78310 [348-360]		0	1342.72	0.705	0.0295577	0	117.3	82.7	13951497	8.18848e+06	4311		Light	High	Peak Found	High	0.13	0.0009208	0.006389	2.24	47.78
	TRUE	High	[R].MGAIPVMIPAQSK.[D]	1xOxidation [M1]	0.0277697	0.00166208	1	1	1	P78310	P78310 [348-360]		0	1358.72	0.966	0.615495	0	101.7	98.3	10275702	8257042	4310		Light	High	Peak Found	High	-1.47	0.001546	0.01932	2.29	40.94
	TRUE	High	[R].MGAIPVMIPAQSK.[D]	1xOxidation [M]; 1xLabel:13C(6)15N(2) [K13]	0.00791784	0.000914196	1	1	2	P78310	P78310 [348-360]		0	1366.73								4310	Redundant	Heavy	Peak Found	High	High	-0.49	0.0008339	0.005237	2.59	40.94
	TRUE	High	[R].MGAIPVMIPAQSK.[D]	2xOxidation [M1; M7]	0.00424328	0.000596234	1	1	1	P78310	P78310 [348-360]		0	1374.71	0.769	0.127659	0	113.1	86.9	5.31719e+06	3.40194e+06	4309		Light	High	Peak Found	High	-1.69	0.0005035	0.002736	3.26	34.27
	TRUE	High	[R].MGAIPVMIPAQSK.[D]	2xOxidation [M1; M7]; 1xLabel:13C(6)15N(2) [K13]	0.00162565	0.000224419	1	1	1	P78310	P78310 [348-360]		0	1382.73								4309	Redundant	Heavy	Peak Found	High	High	-0.82	0.0002185	0.001016	2.51	34.27
	TRUE	High	[R].SYIGSNHSSLGSMSPSNMEGYSK.[T]		4.09736e-09	9.1126e-05	1	1	3	P78310	P78310 [293-315]		0	2420.05	1.009	0.821076	0	99.5	100.5	10433674	8762843	5878		Light	High	Peak Found	High	-0.39	0.0001192	1.494e-09	5.99	39.35
	TRUE	High	[R].SYIGSNHSSLGSMSPSNMEGYSK.[T]	1xLabel:13C(6)15N(2) [K23]	5.93076e-07	9.1126e-05	1	1	3	P78310	P78310 [293-315]		0	2428.06								5878	Redundant	Heavy	Peak Found	High	High	-0.04	0.0001192	2.651e-07	3.97	39.35
	TRUE	High	[R].SYIGSNHSSLGSMSPSNMEGYSK.[T]	1xOxidation [M]	1.51735e-08	9.1126e-05	1	1	4	P78310	P78310 [293-315]		0	2436.04	1.005	0.787791	0	99.7	100.3	9958778	8330401	5876		Light	High	Peak Found	High	0.74	0.0001192	5.819e-09	4.1	29.9
	TRUE	High	[R].SYIGSNHSSLGSMSPSNMEGYSK.[T]	1xOxidation [M]; 1xLabel:13C(6)15N(2) [K23]	8.51544e-10	9.1126e-05	1	1	3	P78310	P78310 [293-315]		0	2444.06								5876	Redundant	Heavy	Peak Found	High	High	2.35	0.0001192	2.895e-10	5.54	29.9
	TRUE	High	[R].SYIGSNHSSLGSMSPSNMEGYSK.[T]	2xOxidation [M13; M18]	1.87942e-07	9.1126e-05	1	1	2	P78310	P78310 [293-315]		0	2452.04								5874	Redundant	Light	High	Peak Found	High	0.18	0.0001192	8.002e-08	5.08	22.42
	TRUE	High	[R].SYIGSNHSSLGSMSPSNMEGYSK.[T]	2xOxidation [M13; M18]; 1xLabel:13C(6)15N(2) [K23]	3.33862e-07	9.1126e-05	1	1	2	P78310	P78310 [293-315]		0	2460.05	0.945	0.514404	0	102.8	97.2	7.93118e+06	6.2371e+06	5874		Heavy	Peak Found	High	High	-0.05	0.0001192	1.456e-07	5.86	22.42
	TRUE	High	[R].TPQSPTLPPAK.[V]	1xLabel:13C(6)15N(2) [K11]	0.113453	0.00816453	1	1	1	P78310	P78310 [329-339]		0	1144.65								6201	No Quan Values	Heavy	Not Found	High	High	-1.2	0.006667	0.08588	1.71
	TRUE	High	[K].TQYNQVPSEDFER.[T]		2.33769e-07	9.1126e-05	1	1	2	P78310	P78310 [316-328]		0	1612.72								6236	Redundant	Light	High	Peak Found	High	-0.55	0.0001192	1.004e-07	3.9	31.71
	TRUE	High	[K].TQYNQVPSEDFER.[T]	1xLabel:13C(6)15N(4) [R13]	2.28457e-05	9.1126e-05	1	1	3	P78310	P78310 [316-328]		0	1622.73	0.809	0.151812	0	110.6	89.4	73869984	49697924	6236		Heavy	Peak Found	High	High	-0.52	0.0001192	1.191e-05	3.62	31.71
	TRUE	High	[K].VDQVIILYSGDK.[I]	1xLabel:13C(6)15N(2) [K12]	5.31128e-05	9.1126e-05	1	1	1	P78310	P78310 [67-78]		0	1357.75	0.863	0.473588	0	107.4	92.6	1.64918e+06	1.18362e+06	6455		Heavy	Peak Found	High	High	0.3	0.0001192	2.885e-05	2.85	45.95
	TRUE	High	[K].YEKEVHHDIREDVPPPK.[S]		0.0919992	0.00626304	1	1	1	P78310	P78310 [269-285]		2	2088.05	0.87	0.471523	0	107	93	1.75574e+06	1.27087e+06	7115		Light	High	Peak Found	High	0.22	0.005232	0.06847	2.77	16.35
TRUE	High	Master Protein	Q00610	Clathrin heavy chain 1 OS=Homo sapiens OX=9606 GN=CLTC PE=1 SV=5	0	163.869	16	22	50	19	1675	191.5	5.69	154.43	22	Pf00637, Pf01394, Pf09268, Pf13838	1213	ENSG00000141367	CLTC	D3DU00; hsa:1213; Q00610; Q6N0A0; Q86TF2	Synaptic vesicle pathway; VEGFA-VEGFR2 signaling pathway; Ebola virus pathway in host; Fragile X syndrome; 7q11.23 copy number variation syndrome; Complement and coagulation cascades	RHOV GTPase cycle; RHOU GTPase cycle; Cargo recognition for clathrin-mediated endocytosis; Recycling pathway of L1; MHC class II antigen presentation; WNT5A-dependent internalization of FZD4; EPH-ephrin mediated repulsion of cells; LDL clearance; Retrograde neurotrophin signalling; WNT5A-dependent internalization of FZD2, FZD5 and ROR2; VLDLR internalisation and degradation; ALK mutants bind TKIs…	Lysosome; Endocytosis; Synaptic vesicle cycle; Endocrine and other factor-regulated calcium reabsorption; Huntington disease; Bacterial invasion of epithelial cells	31	5	1.215	0.339408	10.51	88.3	111.7	9.89041e+07	1.04159e+08	High	High	1
	Checked	Confidence	Annotated Sequence	Modifications	Qvality PEP	Qvality q-value	# Protein Groups	# Proteins	# PSMs	Master Protein Accessions	Positions in Master Proteins	Modifications in Master Proteins	# Missed Cleavages	Theo. MH+ [Da]	Abundance Ratio: (Heavy) / (Light)	Abundance Ratio P-Value: (Heavy) / (Light)	Abundance Ratio Variability [%]: (Heavy) / (Light)	Abundances (Grouped): Light	Abundances (Grouped): Heavy	Abundance: F2: Light, Sample	Abundance: F2: Heavy, Sample	Precursor Quan Result ID	Quan Info	Quan Channel	Found in Sample: [S2] F2: Light, Sample	Found in Sample: [S4] F2: Heavy, Sample	Confidence (by Search Engine): Sequest HT	DeltaM [ppm] (by Search Engine): Sequest HT	Percolator q-Value (by Search Engine): Sequest HT	Percolator PEP (by Search Engine): Sequest HT	XCorr (by Search Engine): Sequest HT	Top Apex RT [min]
	TRUE	High	[R].ALEHFTDLYDIKR.[A]		0.00020096	9.1126e-05	1	1	2	Q00610	Q00610 [626-638]		1	1620.84								320	Redundant	Light	High	Peak Found	High	0.67	0.0001192	0.0001152	3.62	43.84
	TRUE	High	[R].ALEHFTDLYDIKR.[A]	1xLabel:13C(6)15N(2) [K12]; 1xLabel:13C(6)15N(4) [R13]	0.000606418	9.1126e-05	1	1	3	Q00610	Q00610 [626-638]		1	1638.86	1.233	0.385224	0	89.6	110.4	8982829	9.21573e+06	320		Heavy	Peak Found	High	High	0.03	0.0001192	0.0003626	3.2	43.84
	TRUE	High	[K].EAIDSYIK.[A]		0.0782108	0.00515555	1	1	1	Q00610	Q00610 [1123-1130]		0	938.483	1.466	0.145213	0	81.1	118.9	2.70985e+06	3306804	1269		Light	High	Peak Found	High	-0.51	0.004323	0.05775	1.71	27.78
	TRUE	High	[R].EHLELFWSR.[V]	1xLabel:13C(6)15N(4) [R9]	0.00258155	0.000224419	1	1	1	Q00610	Q00610 [1334-1342]		0	1226.62								1505	No Quan Values	Heavy	Not Found	High	High	-0.71	0.0002185	0.001637	2.56
	TRUE	High	[R].FLRENPYYDSR.[V]	2xLabel:13C(6)15N(4) [R3; R11]	0.00359624	0.000477939	1	1	1	Q00610	Q00610 [893-903]		1	1479.71	100	1e-17			200		4.85302e+06	1926		Heavy	Not Found	High	High	-0.03	0.0004125	0.002304	2.86	25.82
	TRUE	High	[R].KFNALFAQGNYSEAAK.[V]		2.70372e-07	9.1126e-05	1	1	3	Q00610	Q00610 [367-382]		1	1758.88	1.204	0.479638	0	90.8	109.2	8336934	8350694	2657		Light	High	Peak Found	High	-0.23	0.0001192	1.171e-07	4.59	39.16
	TRUE	High	[R].KFNALFAQGNYSEAAK.[V]	2xLabel:13C(6)15N(2) [K1; K16]	1.83885e-07	9.1126e-05	1	1	3	Q00610	Q00610 [367-382]		1	1774.91								2657	Redundant	Heavy	Peak Found	High	High	0.46	0.0001192	7.845e-08	5.31	39.16
	TRUE	High	[R].KVSQPIEGHAASFAQFK.[M]		0.0517027	0.00320554	1	1	1	Q00610	Q00610 [189-205]		1	1844.97	1.289	0.414441	0	87.4	112.6	1.48833e+06	1.59591e+06	2771		Light	High	Peak Found	High	0.21	0.002779	0.03717	3.15	31.42
	TRUE	High	[R].IAAYLFK.[G]		0.0520548	0.00320554	1	1	2	Q00610	Q00610 [1510-1516]		0	825.487	1.408	0.165624	0	83.1	116.9	4337644	5080546	2790		Light	High	Peak Found	High	0.26	0.002779	0.03731	1.58	38.1
	TRUE	High	[R].IAAYLFK.[G]	1xLabel:13C(6)15N(2) [K7]	0.148629	0.00996047	1	1	1	Q00610	Q00610 [1510-1516]		0	833.501								2790	Redundant	Heavy	Peak Found	High	High	0.37	0.008145	0.1151	1.55	38.1
	TRUE	High	[R].LAELEEFINGPNNAHIQQVGDR.[C]		0.000255441	9.1126e-05	1	1	2	Q00610	Q00610 [1183-1204]		0	2464.22	0.987	0.744366	0	100.6	99.4	6493733	5.33474e+06	2797		Light	High	Peak Found	High	0.17	0.0001192	0.0001475	4.13	55.47
	TRUE	High	[R].LAELEEFINGPNNAHIQQVGDR.[C]	1xLabel:13C(6)15N(4) [R22]	0.000119928	9.1126e-05	1	1	1	Q00610	Q00610 [1183-1204]		0	2474.23								2797	Redundant	Heavy	Peak Found	High	High	1.18	0.0001192	6.728e-05	3.81	55.47
	TRUE	High	[R].LASTLVHLGEYQAAVDGAR.[K]		7.01071e-07	9.1126e-05	1	1	1	Q00610	Q00610 [1227-1245]		0	1971.03	1.378	0.153199	0	84.1	115.9	7752635	8888446	2882		Light	High	Peak Found	High	0.21	0.0001192	3.174e-07	4.23	50.96
	TRUE	High	[R].LASTLVHLGEYQAAVDGAR.[K]	1xLabel:13C(6)15N(4) [R19]	1.15447e-07	9.1126e-05	1	1	3	Q00610	Q00610 [1227-1245]		0	1981.04								2882	Redundant	Heavy	Peak Found	High	High	0.34	0.0001192	4.815e-08	5.6	50.96
	TRUE	High	[K].LHIIEVGTPPTGNQPFPK.[K]		0.000584797	9.1126e-05	1	1	1	Q00610	Q00610 [228-245]		0	1945.05	1.009	0.828905	0	99.6	100.4	5.59415e+06	4694695	3236		Light	High	Peak Found	High	0.84	0.0001192	0.0003498	2.42
	TRUE	High	[K].LHIIEVGTPPTGNQPFPK.[K]	1xLabel:13C(6)15N(2) [K18]	0.0132293	0.00130832	1	1	1	Q00610	Q00610 [228-245]		0	1953.07								3236	Redundant	Heavy	Peak Found	High	High	0.35	0.001212	0.00894	2.66	49.68
	TRUE	High	[R].LKLLLPWLEAR.[I]	1xLabel:13C(6)15N(2) [K2]; 1xLabel:13C(6)15N(4) [R11]	6.32413e-05	9.1126e-05	1	1	1	Q00610	Q00610 [855-865]		1	1369.87	1.221	0.42539	0	90	110	237666	241479	3268		Heavy	Peak Found	High	High	-0.05	0.0001192	3.442e-05	3.46	73.53
	TRUE	High	[K].LLLPWLEAR.[I]	1xLabel:13C(6)15N(4) [R9]	0.000301919	9.1126e-05	1	1	1	Q00610	Q00610 [857-865]		0	1120.68	1.085	0.778135	0	95.9	104.1	2.5467e+06	2299601	3397		Heavy	Peak Found	High	High	0.28	0.0001192	0.000176	2.13	72.08
	TRUE	High	[K].LLYNNVSNFGR.[L]		0.000764989	9.1126e-05	1	1	1	Q00610	Q00610 [1216-1226]		0	1296.67	1.209	0.450418	0	90.6	109.4	20700788	20820164	3504		Light	High	Peak Found	High	0.08	0.0001192	0.0004628	2.48	41.26
	TRUE	High	[K].LLYNNVSNFGR.[L]	1xLabel:13C(6)15N(4) [R11]	3.54952e-06	9.1126e-05	1	1	1	Q00610	Q00610 [1216-1226]		0	1306.68								3504	Redundant	Heavy	Peak Found	High	High	0.01	0.0001192	1.718e-06	3.44	41.26
	TRUE	High	[R].NLQNLLILTAIK.[A]	1xLabel:13C(6)15N(2) [K12]	0.000520646	9.1126e-05	2	2	1	Q00610; P53675	Q00610 [1023-1034]; P53675 [1023-1034]		0	1361.86	1.232	0.400535	0	89.6	110.4	210765	216120	4745	Shared	Heavy	Peak Found	High	High	-0.24	0.0001192	0.0003112	2.7	73.59
	TRUE	High	[R].NNLAGAEELFAR.[K]		0.000170016	9.1126e-05	1	1	2	Q00610	Q00610 [355-366]		0	1304.66	1.188	0.508321	0	91.4	108.6	12640729	12497569	4776		Light	High	Peak Found	High	1.37	0.0001192	9.693e-05	3.41	48.77
	TRUE	High	[R].NNLAGAEELFAR.[K]	1xLabel:13C(6)15N(4) [R12]	1.68322e-05	9.1126e-05	1	1	2	Q00610	Q00610 [355-366]		0	1314.67								4776	Redundant	Heavy	Peak Found	High	High	-0.21	0.0001192	8.705e-06	4.04	48.77
	TRUE	High	[K].QLPLVKPYLR.[S]		0.0150332	0.00130832	1	1	2	Q00610	Q00610 [1444-1453]		0	1226.76	1.166	0.573425	0	92.3	107.7	4309694	4.18205e+06	5049		Light	High	Peak Found	High	0.59	0.001212	0.01021	1.88	40.33
	TRUE	High	[K].SVNESLNNLFITEEDYQALR.[T]	1xLabel:13C(6)15N(4) [R20]	0.0058615	0.000694413	1	1	1	Q00610	Q00610 [1462-1481]		0	2365.15								5833	No Quan Values	Heavy	Not Found	High	High	1.5	0.0005813	0.003843	3.07
	TRUE	High	[K].TLQIFNIEMK.[S]	1xLabel:13C(6)15N(2) [K10]	0.027576	0.00166208	2	2	1	Q00610; P53675	Q00610 [87-96]; P53675 [87-96]		0	1244.68	1.313	0.284216	0	86.5	113.5	1.87193e+06	2.04563e+06	6121	Shared	Heavy	Peak Found	High	High	1.39	0.001546	0.01912	2.26	61.63
	TRUE	High	[K].TLQIFNIEMK.[S]	1xOxidation [M9]	0.0737193	0.00489315	2	2	1	Q00610; P53675	Q00610 [87-96]; P53675 [87-96]		0	1252.66	1.282	0.288933	0	87.6	112.4	2.17429e+06	2.31922e+06	6122	Shared	Light	High	Peak Found	High	-0.34	0.00405	0.05414	2.46	51.49
	TRUE	High	[R].TSIDAYDNFDNISLAQR.[L]		3.13668e-06	9.1126e-05	1	1	1	Q00610	Q00610 [1482-1498]		0	1942.91	1.18	0.544847	0	91.8	108.2	4249758	4.17159e+06	6248		Light	High	Peak Found	High	-1.36	0.0001192	1.505e-06	3.8	56.46
	TRUE	High	[R].TSIDAYDNFDNISLAQR.[L]	1xLabel:13C(6)15N(4) [R17]	1.03197e-08	9.1126e-05	1	1	1	Q00610	Q00610 [1482-1498]		0	1952.92								6248	Redundant	Heavy	Peak Found	High	High	1.29	0.0001192	3.89e-09	4.15	56.46
	TRUE	High	[K].VSQPIEGHAASFAQFK.[M]		0.00820595	0.000914196	1	1	1	Q00610	Q00610 [190-205]		0	1716.87								6919	No Quan Values	Light	High	Not Found	High	0.65	0.0008339	0.005416	2.59
	TRUE	High	[K].VSQPIEGHAASFAQFK.[M]	1xLabel:13C(6)15N(2) [K16]	0.0108392	0.00122778	1	1	1	Q00610	Q00610 [190-205]		0	1724.88								6919	Redundant	Heavy	Not Found	High	High	-0.72	0.001157	0.007264	3.06
	TRUE	High	[R].VVGAMQLYSVDR.[K]		5.29543e-06	9.1126e-05	2	2	1	Q00610; P53675	Q00610 [177-188]; P53675 [177-188]		0	1337.69	1.343	0.23535	0	85.4	114.6	2.04625e+06	2.28591e+06	6966	Shared	Light	High	Peak Found	High	-0.63	0.0001192	2.606e-06	3.53	42.73
	TRUE	High	[R].VVGAMQLYSVDR.[K]	1xOxidation [M5]; 1xLabel:13C(6)15N(4) [R12]	0.0176943	0.00149171	2	2	1	Q00610; P53675	Q00610 [177-188]; P53675 [177-188]		0	1363.69	1.044	0.892416	0	97.9	102.1	1.30965e+06	1.13729e+06	6965	Shared	Heavy	Peak Found	High	High	-1.11	0.001344	0.01204	3.01	32.7
	TRUE	High	[K].WLLLTGISAQQNR.[V]		1.32405e-05	9.1126e-05	1	1	1	Q00610	Q00610 [164-176]		0	1499.83								7046	Redundant	Light	High	Peak Found	High	-3.96	0.0001192	6.759e-06	2.88	62.62
	TRUE	High	[K].WLLLTGISAQQNR.[V]	1xLabel:13C(6)15N(4) [R13]	6.23281e-05	9.1126e-05	1	1	1	Q00610	Q00610 [164-176]		0	1509.84	0.822	0.50872	0	109.8	90.2	909731	622038	7046		Heavy	Peak Found	High	High	-0.43	0.0001192	3.408e-05	2.73	62.62
TRUE	High	Master Protein	P11021	Endoplasmic reticulum chaperone BiP OS=Homo sapiens OX=9606 GN=HSPA5 PE=1 SV=2	0	163.541	31	16	44	15	654	72.3	5.16	153.82	16	Pf00012	3309	ENSG00000044574	HSPA5	B0QZ61; hsa:3309; P11021; Q2EF78; Q9NPF1; Q9UK02	Parkin-ubiquitin proteasomal system pathway; Apoptosis-related network due to altered Notch3 in ovarian cancer; Photodynamic therapy-induced unfolded protein response; Prion disease pathway; Unfolded protein response; Orexin receptor pathway	Platelet degranulation ; Antigen Presentation: Folding, assembly and peptide loading of class I MHC; PERK regulates gene expression; Regulation of HSF1-mediated heat shock response; IRE1alpha activates chaperones; ATF6 (ATF6-alpha) activates chaperone genes	Protein export; Protein processing in endoplasmic reticulum; Antigen processing and presentation; Thyroid hormone synthesis; Parkinson disease; Amyotrophic lateral sclerosis; Prion disease; Pathways of neurodegeneration; Lipid and atherosclerosis	22	0	0.983	0.780564	25.82	103.3	96.7	6.30757e+07	4.91029e+07	High	High	1
	Checked	Confidence	Annotated Sequence	Modifications	Qvality PEP	Qvality q-value	# Protein Groups	# Proteins	# PSMs	Master Protein Accessions	Positions in Master Proteins	Modifications in Master Proteins	# Missed Cleavages	Theo. MH+ [Da]	Abundance Ratio: (Heavy) / (Light)	Abundance Ratio P-Value: (Heavy) / (Light)	Abundance Ratio Variability [%]: (Heavy) / (Light)	Abundances (Grouped): Light	Abundances (Grouped): Heavy	Abundance: F2: Light, Sample	Abundance: F2: Heavy, Sample	Precursor Quan Result ID	Quan Info	Quan Channel	Found in Sample: [S2] F2: Light, Sample	Found in Sample: [S4] F2: Heavy, Sample	Confidence (by Search Engine): Sequest HT	DeltaM [ppm] (by Search Engine): Sequest HT	Percolator q-Value (by Search Engine): Sequest HT	Percolator PEP (by Search Engine): Sequest HT	XCorr (by Search Engine): Sequest HT	Top Apex RT [min]
	TRUE	High	[R].AKFEELNMDLFR.[S]		0.00394887	0.000477939	1	1	1	P11021	P11021 [325-336]		1	1512.75								269	Redundant	Light	High	Peak Found	High	-0.1	0.0004125	0.002551	2.8	58.95
	TRUE	High	[R].AKFEELNMDLFR.[S]	1xLabel:13C(6)15N(2) [K2]; 1xLabel:13C(6)15N(4) [R12]	0.000313092	9.1126e-05	1	1	1	P11021	P11021 [325-336]		1	1530.77	1.145	0.634683	0	93.3	106.7	939956	895333	269		Heavy	Peak Found	High	High	-0.3	0.0001192	0.000182	2.94	58.95
	TRUE	High	[K].DAGTIAGLNVMR.[I]		2.83301e-06	9.1126e-05	1	1	1	P11021	P11021 [186-197]		0	1217.63								766	Redundant	Light	High	Peak Found	High	-0.26	0.0001192	1.352e-06	3	46.04
	TRUE	High	[K].DAGTIAGLNVMR.[I]	1xLabel:13C(6)15N(4) [R12]	3.49826e-06	9.1126e-05	1	1	1	P11021	P11021 [186-197]		0	1227.64	1.279	0.351103	0	87.8	112.2	4.88206e+06	5196173	766		Heavy	Peak Found	High	High	1.07	0.0001192	1.694e-06	3.13	46.04
	TRUE	High	[K].DAGTIAGLNVMR.[I]	1xOxidation [M11]; 1xLabel:13C(6)15N(4) [R12]	0.00469237	0.000596234	1	1	1	P11021	P11021 [186-197]		0	1243.63								767	No Quan Values	Heavy	Not Found	High	High	0.96	0.0005035	0.003046	3.11
	TRUE	High	[K].ELEEIVQPIISK.[L]		0.000884461	9.1126e-05	1	1	1	P11021	P11021 [622-633]		0	1397.79	0.899	0.488951	0	105.3	94.7	4664203	3.48874e+06	1544		Light	High	Peak Found	High	-0.06	0.0001192	0.0005365	3.31	51.63
	TRUE	High	[K].ELEEIVQPIISK.[L]	1xLabel:13C(6)15N(2) [K12]	1.7583e-05	9.1126e-05	1	1	1	P11021	P11021 [622-633]		0	1405.8								1544	Redundant	Heavy	Peak Found	High	High	0.18	0.0001192	9.072e-06	3.44	51.63
	TRUE	High	[K].FEELNMDLFR.[S]		0.00187869	0.000224419	1	1	1	P11021	P11021 [327-336]		0	1313.62	0.738	0.285863	0	115.1	84.9	431071	264554	1865		Light	High	Peak Found	High	-0.55	0.0002185	0.001179	2.26	64.98
	TRUE	High	[R].IINEPTAAAIAYGLDK.[KRG]		1.19859e-09	9.1126e-05	3	4	1	P54652; P11142; P11021	P54652 [173-188]; P11142 [172-187]; P11021 [198-213]		0	1659.9	0.971	0.685265	0	101.5	98.5	6039634	4879977	3417	Shared	Light	High	Peak Found	High	0.04	0.0001192	4.136e-10	3.9	55.24
	TRUE	High	[R].IINEPTAAAIAYGLDK.[KRG]	1xLabel:13C(6)15N(2) [K16]	0.000764989	9.1126e-05	3	4	1	P54652; P11142; P11021	P54652 [173-188]; P11142 [172-187]; P11021 [198-213]		0	1667.91								3417	Redundant	Heavy	Peak Found	High	High	0.53	0.0001192	0.0004614	2.59	55.24
	TRUE	High	[R].ITPSYVAFTPEGER.[L]		0.00500565	0.000694413	1	1	1	P11021	P11021 [61-74]		0	1566.78	0.812	0.137601	0	110.4	89.6	9722470	6566032	3860		Light	High	Peak Found	High	0.22	0.0005813	0.003247	2.47	44.49
	TRUE	High	[R].ITPSYVAFTPEGER.[L]	1xLabel:13C(6)15N(4) [R14]	0.00183837	0.000224419	1	1	1	P11021	P11021 [61-74]		0	1576.79								3860	Redundant	Heavy	Peak Found	High	High	-0.84	0.0002185	0.001153	3.04	44.49
	TRUE	High	[K].LYGSAGPPPTGEEDTAEK.[D]		6.54635e-08	9.1126e-05	1	1	2	P11021	P11021 [634-651]		0	1818.84	0.535	0.00692562	0	130.3	69.7	2.17343e+06	966904	4001		Light	High	Peak Found	High	-0.13	0.0001192	2.667e-08	4.15	23.28
	TRUE	High	[K].LYGSAGPPPTGEEDTAEK.[D]	1xLabel:13C(6)15N(2) [K18]	1.25832e-05	9.1126e-05	1	1	2	P11021	P11021 [634-651]		0	1826.85								4001	Redundant	Heavy	Peak Found	High	High	-1.35	0.0001192	6.43e-06	3.51	23.28
	TRUE	High	[K].LYGSAGPPPTGEEDTAEKDEL.[-]		7.82772e-09	9.1126e-05	1	1	2	P11021	P11021 [634-654]		1	2175.99	0.635	0.0463118	0	122.3	77.7	3664904	1.93777e+06	4002		Light	High	Peak Found	High	-0.08	0.0001192	2.926e-09	4.88	38.21
	TRUE	High	[K].LYGSAGPPPTGEEDTAEKDEL.[-]	1xLabel:13C(6)15N(2) [K18]	2.04453e-08	9.1126e-05	1	1	2	P11021	P11021 [634-654]		1	2184.01								4002	Redundant	Heavy	Peak Found	High	High	-0.87	0.0001192	7.927e-09	5.04	38.21
	TRUE	High	[R].NELESYAYSLK.[N]		0.000268774	9.1126e-05	1	1	1	P11021	P11021 [563-573]		0	1316.64	1.05	0.938268	0	97.5	102.5	7809005	6.82566e+06	4642		Light	High	Peak Found	High	0.32	0.0001192	0.0001556	2.98	44.73
	TRUE	High	[R].NELESYAYSLK.[N]	1xLabel:13C(6)15N(2) [K11]	0.0233005	0.00166208	1	1	1	P11021	P11021 [563-573]		0	1324.65								4642	Redundant	Heavy	Peak Found	High	High	0.02	0.001494	0.0161	2.37	44.73
	TRUE	High	[K].NQLTSNPENTVFDAK.[R]		1.48745e-05	9.1126e-05	1	1	1	P11021	P11021 [82-96]		0	1677.81	1.025	0.926274	0	98.8	101.2	4225470	3604633	4808		Light	High	Peak Found	High	-0.51	0.0001192	7.649e-06	4.16	36.53
	TRUE	High	[K].NQLTSNPENTVFDAK.[R]	1xLabel:13C(6)15N(2) [K15]	7.84285e-06	9.1126e-05	1	1	1	P11021	P11021 [82-96]		0	1685.82								4808	Redundant	Heavy	Peak Found	High	High	-0.3	0.0001192	3.91e-06	4.02	36.53
	TRUE	High	[K].SDIDEIVLVGGSTR.[I]		5.46805e-05	9.1126e-05	1	1	1	P11021	P11021 [354-367]		0	1460.76	1.207	0.49092	0	90.6	109.4	1.00814e+06	1.01284e+06	5326		Light	High	Peak Found	High	-1.3	0.0001192	2.958e-05	3.14	51.49
	TRUE	High	[K].SQIFSTASDNQPTVTIK.[V]		1.37466e-07	9.1126e-05	1	1	2	P11021	P11021 [448-464]		0	1836.93	0.846	0.231384	0	108.4	91.6	8.08771e+06	5690877	5682		Light	High	Peak Found	High	0.62	0.0001192	5.804e-08	4.12	41.4
	TRUE	High	[K].SQIFSTASDNQPTVTIK.[V]	1xLabel:13C(6)15N(2) [K17]	7.34591e-06	9.1126e-05	1	1	2	P11021	P11021 [448-464]		0	1844.95								5682	Redundant	Heavy	Peak Found	High	High	-0.59	0.0001192	3.653e-06	3.92	41.4
	TRUE	High	[K].TFAPEEISAMVLTK.[M]		0.000516878	9.1126e-05	1	1	1	P11021	P11021 [139-152]		0	1536.8	0.76	0.221075	0	113.6	86.4	1.73291e+06	1.09615e+06	5992		Light	High	Peak Found	High	-0.13	0.0001192	0.0003081	2.6	64.74
	TRUE	High	[K].TFAPEEISAMVLTK.[M]	1xOxidation [M10]	0.0211124	0.00149171	1	1	1	P11021	P11021 [139-152]		0	1552.79								5993	No Quan Values	Light	High	Not Found	High	-0.75	0.001344	0.01444	2.59
	TRUE	High	[K].TKPYIQVDIGGGQTK.[T]		0.000237532	9.1126e-05	1	1	1	P11021	P11021 [124-138]		0	1604.86	1.016	0.880187	0	99.2	100.8	1817229	1.53613e+06	6058		Light	High	Peak Found	High	0.35	0.0001192	0.000137	3	30.12
	TRUE	High	[K].TKPYIQVDIGGGQTK.[T]	2xLabel:13C(6)15N(2) [K2; K15]	0.000106756	9.1126e-05	1	1	1	P11021	P11021 [124-138]		0	1620.89								6058	Redundant	Heavy	Peak Found	High	High	-0.94	0.0001192	5.944e-05	2.88	30.12
	TRUE	High	[R].TWNDPSVQQDIK.[F]		5.46805e-05	9.1126e-05	1	1	1	P11021	P11021 [102-113]		0	1430.69	0.972	0.678325	0	101.4	98.6	6.72934e+06	5440644	6350		Light	High	Peak Found	High	-0.27	0.0001192	2.957e-05	2.88	31.9
	TRUE	High	[R].TWNDPSVQQDIK.[F]	1xLabel:13C(6)15N(2) [K12]	1.53136e-05	9.1126e-05	1	1	1	P11021	P11021 [102-113]		0	1438.71								6350	Redundant	Heavy	Peak Found	High	High	0.73	0.0001192	7.881e-06	3.47	31.9
	TRUE	High	[K].VTHAVVTVPAYFNDAQR.[Q]		1.11197e-05	9.1126e-05	1	1	2	P11021	P11021 [165-181]		0	1887.97	0.994	0.776364	0	100.3	99.7	4.86802e+06	4.02725e+06	6938		Light	High	Peak Found	High	-0.01	0.0001192	5.643e-06	3.6	43.46
	TRUE	High	[K].VTHAVVTVPAYFNDAQR.[Q]	1xLabel:13C(6)15N(4) [R17]	3.33467e-05	9.1126e-05	1	1	2	P11021	P11021 [165-181]		0	1897.98								6938	Redundant	Heavy	Peak Found	High	High	-0.15	0.0001192	1.77e-05	4	43.46
TRUE	High	Master Protein	Q01082	Spectrin beta chain, non-erythrocytic 1 OS=Homo sapiens OX=9606 GN=SPTBN1 PE=1 SV=2	0	162.238	11	17	35	17	2364	274.4	5.57	134.86	17	Pf00169, Pf00307, Pf00435	6711	ENSG00000115306	SPTBN1	B2RP63; hsa:6711; O60837; Q01082; Q16057; Q53R99; Q59ER3; Q8IX99	TGF-beta signaling pathway; Sudden infant death syndrome (SIDS) susceptibility pathways	COPI-mediated anterograde transport; RHOV GTPase cycle; RHOU GTPase cycle; Nephrin family interactions; RAF/MAP kinase cascade; NCAM signaling for neurite out-growth; Signaling by FLT3 fusion proteins; Sensory processing of sound by inner hair cells of the cochlea; Sensory processing of sound by outer hair cells of the cochlea; Interaction between L1 and Ankyrins		12	0	1.116	0.645884	14.29	106.9	93.1	1.10598e+07	8.01812e+06	High	High	1
	Checked	Confidence	Annotated Sequence	Modifications	Qvality PEP	Qvality q-value	# Protein Groups	# Proteins	# PSMs	Master Protein Accessions	Positions in Master Proteins	Modifications in Master Proteins	# Missed Cleavages	Theo. MH+ [Da]	Abundance Ratio: (Heavy) / (Light)	Abundance Ratio P-Value: (Heavy) / (Light)	Abundance Ratio Variability [%]: (Heavy) / (Light)	Abundances (Grouped): Light	Abundances (Grouped): Heavy	Abundance: F2: Light, Sample	Abundance: F2: Heavy, Sample	Precursor Quan Result ID	Quan Info	Quan Channel	Found in Sample: [S2] F2: Light, Sample	Found in Sample: [S4] F2: Heavy, Sample	Confidence (by Search Engine): Sequest HT	DeltaM [ppm] (by Search Engine): Sequest HT	Percolator q-Value (by Search Engine): Sequest HT	Percolator PEP (by Search Engine): Sequest HT	XCorr (by Search Engine): Sequest HT	Top Apex RT [min]
	TRUE	High	[R].DASVAEAWLLGQEPYLSSR.[E]		0.000329431	9.1126e-05	1	1	1	Q01082	Q01082 [2025-2043]		0	2092.03								786	No Quan Values	Light	High	Not Found	High	-1.8	0.0001192	0.0001926	3.54
	TRUE	High	[R].DLDDFQSWLSR.[T]		0.000372747	9.1126e-05	1	1	1	Q01082	Q01082 [1070-1080]		0	1381.64	1.161	0.563045	0	92.5	107.5	547624	529226	948		Light	High	Peak Found	High	0.22	0.0001192	0.0002185	2.56	70.41
	TRUE	High	[R].DLDDFQSWLSR.[T]	1xLabel:13C(6)15N(4) [R11]	5.12161e-05	9.1126e-05	1	1	1	Q01082	Q01082 [1070-1080]		0	1391.65								948	Redundant	Heavy	Peak Found	High	High	-0.01	0.0001192	2.766e-05	3.49	70.41
	TRUE	High	[R].DVEDEILWVGER.[M]		5.38909e-05	9.1126e-05	1	1	1	Q01082	Q01082 [1493-1504]		0	1459.71								1178	Redundant	Light	High	Peak Found	High	0.26	0.0001192	2.92e-05	3.14	65.09
	TRUE	High	[R].DVEDEILWVGER.[M]	1xLabel:13C(6)15N(4) [R12]	0.00367474	0.000477939	1	1	1	Q01082	Q01082 [1493-1504]		0	1469.71	1.297	0.350985	0	87.1	112.9	600011	647579	1178		Heavy	Peak Found	High	High	0.28	0.0004125	0.002358	2.21	65.09
	TRUE	High	[R].EQWANLEQLSAIR.[K]		0.000196625	9.1126e-05	1	1	2	Q01082	Q01082 [724-736]		0	1557.8	1.048	0.869255	0	97.7	102.3	806630	703505	1702		Light	High	Peak Found	High	-1.76	0.0001192	0.0001126	3.4	60.29
	TRUE	High	[R].EQWANLEQLSAIR.[K]	1xLabel:13C(6)15N(4) [R13]	0.000133748	9.1126e-05	1	1	1	Q01082	Q01082 [724-736]		0	1567.81								1702	Redundant	Heavy	Peak Found	High	High	1.07	0.0001192	7.531e-05	3.51	60.29
	TRUE	High	[R].EVDDLEQWIAER.[E]		0.000143835	9.1126e-05	1	1	1	Q01082	Q01082 [1706-1717]		0	1502.71	1.261	0.413424	0	88.5	111.5	873618	916383	1779		Light	High	Peak Found	High	-0.62	0.0001192	8.148e-05	2.98	62.93
	TRUE	High	[R].EVDDLEQWIAER.[E]	1xLabel:13C(6)15N(4) [R12]	3.7462e-05	9.1126e-05	1	1	1	Q01082	Q01082 [1706-1717]		0	1512.72								1779	Redundant	Heavy	Peak Found	High	High	-0.1	0.0001192	1.991e-05	3.53	62.93
	TRUE	High	[R].FESLEPEMNNQASR.[V]		0.0224948	0.00166208	1	1	1	Q01082	Q01082 [891-904]		0	1651.74								1869	Redundant	Light	High	Not Found	High	-0.51	0.001494	0.01547	2.27
	TRUE	High	[R].FESLEPEMNNQASR.[V]	1xLabel:13C(6)15N(4) [R14]	0.0180739	0.00149171	1	1	1	Q01082	Q01082 [891-904]		0	1661.75								1869	No Quan Values	Heavy	Not Found	High	High	-0.7	0.001344	0.01234	2.54
	TRUE	High	[K].GEQVSQNGLPAEQGSPR.[M]		8.97761e-07	9.1126e-05	1	1	1	Q01082	Q01082 [2124-2140]		0	1753.85	0.794	0.422217	0	111.5	88.5	631793	417312	2144		Light	High	Peak Found	High	0.86	0.0001192	4.085e-07	3.89	20.06
	TRUE	High	[K].GEQVSQNGLPAEQGSPR.[M]	1xLabel:13C(6)15N(4) [R17]	6.12458e-06	9.1126e-05	1	1	1	Q01082	Q01082 [2124-2140]		0	1763.85								2144	Redundant	Heavy	Peak Found	High	High	-1.2	0.0001192	3.025e-06	4.7	20.06
	TRUE	High	[K].LLDPEDISVDHPDEK.[S]	1xLabel:13C(6)15N(2) [K15]	0.0902379	0.00598494	1	1	1	Q01082	Q01082 [250-264]		0	1729.84	0.739	0.218767	0	115	85	1.60256e+06	985153	3317		Heavy	Peak Found	High	High	0.35	0.004948	0.06729	2.27	38.31
	TRUE	High	[R].LTTLELLEVR.[R]		0.00493429	0.000694413	1	1	1	Q01082	Q01082 [2079-2088]		0	1186.7	1.323	0.317552	0	86.1	113.9	593437	653144	3874		Light	High	Peak Found	High	0.17	0.0005813	0.0032	2.55	60.27
	TRUE	High	[R].LVSQDNFGFDLPAVEAATK.[K]		2.20555e-07	9.1126e-05	1	1	1	Q01082	Q01082 [444-462]		0	2022.02	1.045	0.857142	0	97.8	102.2	611775	532219	3972		Light	High	Peak Found	High	0.53	0.0001192	9.479e-08	3.37	67.21
	TRUE	High	[R].MAETVDTSEMVNGATEQR.[T]	1xOxidation [M1]; 1xLabel:13C(6)15N(4) [R18]	2.13332e-06	9.1126e-05	1	1	1	Q01082	Q01082 [2141-2158]		0	1994.87								4129	No Quan Values	Heavy	Not Found	High	High	0.1	0.0001192	1.01e-06	3.94
	TRUE	High	[K].NEIDNYEEDYQK.[M]	1xLabel:13C(6)15N(2) [K12]	0.000528264	9.1126e-05	1	1	1	Q01082	Q01082 [1109-1120]		0	1567.66	1.072	0.813589	0	96.5	103.5	854899	762423	4640		Heavy	Peak Found	High	High	-0.71	0.0001192	0.0003154	3.13	28.98
	TRUE	High	[K].QALQDTLALYK.[M]	1xLabel:13C(6)15N(2) [K11]	0.036186	0.00245725	1	1	1	Q01082	Q01082 [843-853]		0	1271.71								4914	No Quan Values	Heavy	Not Found	High	High	1.63	0.002224	0.02559	2.3
	TRUE	High	[R].SQNIVTDSSSLSAEAIR.[Q]		5.72543e-09	9.1126e-05	1	1	1	Q01082	Q01082 [1548-1564]		0	1777.89	1.174	0.609627	0	92	108	1.91527e+06	1.87117e+06	5688		Light	High	Peak Found	High	-0.14	0.0001192	2.111e-09	4.56	42.1
	TRUE	High	[R].SQNIVTDSSSLSAEAIR.[Q]	1xLabel:13C(6)15N(4) [R17]	1.38626e-09	9.1126e-05	1	1	1	Q01082	Q01082 [1548-1564]		0	1787.9								5688	Redundant	Heavy	Peak Found	High	High	-0.39	0.0001192	4.801e-10	4.82	42.1
	TRUE	High	[R].TQETPSAQMEGFLNR.[K]		0.0112323	0.00122778	1	1	1	Q01082	Q01082 [2192-2206]		0	1708.8								6214	Redundant	Light	High	Not Found	High	-3.67	0.001157	0.007491	3.06
	TRUE	High	[R].TQETPSAQMEGFLNR.[K]	1xLabel:13C(6)15N(4) [R15]	0.00010911	9.1126e-05	1	1	1	Q01082	Q01082 [2192-2206]		0	1718.8								6214	No Quan Values	Heavy	Not Found	High	High	-2.27	0.0001192	6.071e-05	3.41
	TRUE	High	[R].TQTAIASEDMPNTLTEAEK.[L]		2.20555e-07	9.1126e-05	1	1	1	Q01082	Q01082 [1081-1099]		0	2049.96	0.01	1e-17		200		1.12678e+06		6228		Light	High	Not Found	High	-0.48	0.0001192	9.461e-08	4.98	40.24
	TRUE	High	[R].TQTAIASEDMPNTLTEAEK.[L]	1xOxidation [M10]; 1xLabel:13C(6)15N(2) [K19]	1.49374e-06	9.1126e-05	1	1	1	Q01082	Q01082 [1081-1099]		0	2073.97								6230	No Quan Values	Heavy	Not Found	High	High	-2.39	0.0001192	6.933e-07	4.27
	TRUE	High	[K].VSEEAESQQQWDTSKGEQVSQNGLPAEQGSPR.[M]		2.38463e-10	9.1126e-05	1	1	1	Q01082	Q01082 [2109-2140]		1	3486.6	0.01	1e-17		200		895430		6900		Light	High	Not Found	High	1.17	0.0001192	7.708e-11	7.25	33.73
	TRUE	High	[K].VSEEAESQQQWDTSKGEQVSQNGLPAEQGSPR.[M]	1xLabel:13C(6)15N(2) [K15]; 1xLabel:13C(6)15N(4) [R32]	8.33712e-05	9.1126e-05	1	1	1	Q01082	Q01082 [2109-2140]		1	3504.62								6900	Redundant	Heavy	Peak Found	High	High	1.66	0.0001192	4.588e-05	5.85	33.73
TRUE	High	Master Protein	Q6IAA8	Ragulator complex protein LAMTOR1 OS=Homo sapiens OX=9606 GN=LAMTOR1 PE=1 SV=2	0	161.919	56	7	72	7	161	17.7	5.15	255.1	7	Pf15454	55004	ENSG00000149357	LAMTOR1	hsa:55004; Q6IAA8; Q8WZ09; Q9NWT0		Neutrophil degranulation; RHOG GTPase cycle; RAC2 GTPase cycle; RAC3 GTPase cycle; Regulation of PTEN gene transcription; TP53 Regulates Metabolic Genes; CDC42 GTPase cycle; RAC1 GTPase cycle; RHOQ GTPase cycle; RHOJ GTPase cycle; RHOH GTPase cycle; Amino acids regulate mTORC1; mTORC1-mediated signalling; Macroautophagy; Energy dependent regulation of mTOR by LKB1-AMPK	mTOR signaling pathway	17	0	1.009	0.901479	13.63	103.5	96.5	2.43111e+08	1.88487e+08	High	High	1
	Checked	Confidence	Annotated Sequence	Modifications	Qvality PEP	Qvality q-value	# Protein Groups	# Proteins	# PSMs	Master Protein Accessions	Positions in Master Proteins	Modifications in Master Proteins	# Missed Cleavages	Theo. MH+ [Da]	Abundance Ratio: (Heavy) / (Light)	Abundance Ratio P-Value: (Heavy) / (Light)	Abundance Ratio Variability [%]: (Heavy) / (Light)	Abundances (Grouped): Light	Abundances (Grouped): Heavy	Abundance: F2: Light, Sample	Abundance: F2: Heavy, Sample	Precursor Quan Result ID	Quan Info	Quan Channel	Found in Sample: [S2] F2: Light, Sample	Found in Sample: [S4] F2: Heavy, Sample	Confidence (by Search Engine): Sequest HT	DeltaM [ppm] (by Search Engine): Sequest HT	Percolator q-Value (by Search Engine): Sequest HT	Percolator PEP (by Search Engine): Sequest HT	XCorr (by Search Engine): Sequest HT	Top Apex RT [min]
	TRUE	High	[K].ALNGAEPNYHSLPSAR.[T]		9.17565e-07	9.1126e-05	1	1	3	Q6IAA8	Q6IAA8 [32-47]		0	1696.84	0.796	0.129733	0	111.3	88.7	7.38919e+07	48969144	387		Light	High	Peak Found	High	0.01	0.0001192	4.201e-07	3.95	26.52
	TRUE	High	[K].ALNGAEPNYHSLPSAR.[T]	1xDeamidated [N3]	2.64227e-05	9.1126e-05	1	1	1	Q6IAA8	Q6IAA8 [32-47]		0	1697.82								386	Redundant	Light	High	Peak Found	High	-0.44	0.0001192	1.387e-05	3.44	28.73
	TRUE	High	[K].ALNGAEPNYHSLPSAR.[T]	1xLabel:13C(6)15N(4) [R16]	7.27036e-07	9.1126e-05	1	1	3	Q6IAA8	Q6IAA8 [32-47]		0	1706.85								387	Redundant	Heavy	Peak Found	High	High	-0.47	0.0001192	3.295e-07	3.76	26.52
	TRUE	High	[K].ALNGAEPNYHSLPSAR.[T]	1xDeamidated [N3]; 1xLabel:13C(6)15N(4) [R16]	0.000993296	9.1126e-05	1	1	1	Q6IAA8	Q6IAA8 [32-47]		0	1707.83	0.3	2.1039e-05	0	153.9	46.1	1.29838e+06	324081	386		Heavy	Peak Found	High	High	-1.49	0.0001192	0.0006053	3.23	28.73
	TRUE	High	[R].KLLLDPSSPPTK.[A]		0.00115664	9.1126e-05	1	1	2	Q6IAA8	Q6IAA8 [20-31]		1	1295.76	0.836	0.211484	0	108.9	91.1	2.49695e+07	1.73756e+07	2712		Light	High	Peak Found	High	0.23	0.0001192	0.0007102	2.43	26.98
	TRUE	High	[R].KLLLDPSSPPTK.[A]	2xLabel:13C(6)15N(2) [K1; K12]	0.000317676	9.1126e-05	1	1	2	Q6IAA8	Q6IAA8 [20-31]		1	1311.79								2712	Redundant	Heavy	Peak Found	High	High	-0.37	0.0001192	0.0001849	2.71	26.98
	TRUE	High	[R].IAAYAYSALSQIR.[V]		7.45355e-06	9.1126e-05	1	1	2	Q6IAA8	Q6IAA8 [135-147]		0	1426.77	1.018	0.837975	0	99.1	100.9	9.73334e+06	8.24864e+06	2789		Light	High	Peak Found	High	-1.18	0.0001192	3.703e-06	3.44	51.83
	TRUE	High	[R].IAAYAYSALSQIR.[V]	1xLabel:13C(6)15N(4) [R13]	0.000133748	9.1126e-05	1	1	2	Q6IAA8	Q6IAA8 [135-147]		0	1436.78								2789	Redundant	Heavy	Peak Found	High	High	-0.56	0.0001192	7.544e-05	3.13	51.83
	TRUE	High	[R].LAVLSSSLTHWK.[K]		3.66535e-05	9.1126e-05	1	1	5	Q6IAA8	Q6IAA8 [92-103]		0	1341.75	1.139	0.665125	0	93.5	106.5	21200193	2.00977e+07	2902		Light	High	Peak Found	High	0.47	0.0001192	1.955e-05	2.43	47.75
	TRUE	High	[R].LAVLSSSLTHWK.[K]	1xLabel:13C(6)15N(2) [K12]	0.00182513	0.000224419	1	1	3	Q6IAA8	Q6IAA8 [92-103]		0	1349.77								2902	Redundant	Heavy	Peak Found	High	High	-0.32	0.0002185	0.00114	2.69	47.75
	TRUE	High	[K].LLLDPSSPPTK.[A]		0.0100218	0.00113965	1	1	1	Q6IAA8	Q6IAA8 [21-31]		0	1167.66	0.748	0.0630366	0	114.4	85.6	16132510	10036652	3386		Light	High	Peak Found	High	-0.18	0.001005	0.006683	2.61	33.98
	TRUE	High	[K].LLLDPSSPPTK.[A]	1xLabel:13C(6)15N(2) [K11]	0.0283589	0.00166208	1	1	1	Q6IAA8	Q6IAA8 [21-31]		0	1175.68								3386	Redundant	Heavy	Peak Found	High	High	0	0.001546	0.01967	2.46	33.98
	TRUE	High	[K].TASNIIDVSAADSQGMEQHEYMDR.[A]		1.31044e-06	9.1126e-05	1	1	3	Q6IAA8	Q6IAA8 [61-84]		0	2668.16								5918	Redundant	Light	High	Peak Found	High	-0.39	0.0001192	6.084e-07	4.25	45.47
	TRUE	High	[K].TASNIIDVSAADSQGMEQHEYMDR.[A]	1xLabel:13C(6)15N(4) [R24]	3.94185e-05	9.1126e-05	1	1	3	Q6IAA8	Q6IAA8 [61-84]		0	2678.17	1	0.783281	0	100	100	13543448	11272888	5918		Heavy	Peak Found	High	High	-0.83	0.0001192	2.108e-05	4.51	45.47
	TRUE	High	[K].TASNIIDVSAADSQGMEQHEYMDR.[A]	1xOxidation [M]	1.77863e-06	9.1126e-05	1	1	6	Q6IAA8	Q6IAA8 [61-84]		0	2684.16								5917	Redundant	Light	High	Peak Found	High	-0.71	0.0001192	8.345e-07	4.76	40.96
	TRUE	High	[K].TASNIIDVSAADSQGMEQHEYMDR.[A]	1xOxidation [M]; 1xLabel:13C(6)15N(4) [R24]	1.69551e-05	9.1126e-05	1	1	4	Q6IAA8	Q6IAA8 [61-84]		0	2694.16	1.039	0.946261	0	98.1	101.9	23791905	20573510	5917		Heavy	Peak Found	High	High	0.97	0.0001192	8.717e-06	3.81	40.96
	TRUE	High	[K].TASNIIDVSAADSQGMEQHEYMDR.[A]	1xDeamidated [N/Q]; 1xOxidation [M]; 1xLabel:13C(6)15N(4) [R24]	0.000319993	9.1126e-05	1	1	4	Q6IAA8	Q6IAA8 [61-84]		0	2695.15								5916	No Quan Values	Heavy	Not Found	High	High	4.71	0.0001192	0.0001866	4.85
	TRUE	High	[K].TASNIIDVSAADSQGMEQHEYMDR.[A]	2xOxidation [M16; M22]	5.99239e-06	9.1126e-05	1	1	2	Q6IAA8	Q6IAA8 [61-84]		0	2700.15								5915	Redundant	Light	High	Peak Found	High	0.06	0.0001192	2.955e-06	4.51	33.85
	TRUE	High	[K].TASNIIDVSAADSQGMEQHEYMDR.[A]	2xOxidation [M16; M22]; 1xLabel:13C(6)15N(4) [R24]	6.6544e-05	9.1126e-05	1	1	2	Q6IAA8	Q6IAA8 [61-84]		0	2710.16	1.027	0.876694	0	98.7	101.3	9249640	7902740	5915		Heavy	Peak Found	High	High	0.57	0.0001192	3.626e-05	4.2	33.85
	TRUE	High	[R].TDEQALLSSILAK.[T]		1.69746e-07	9.1126e-05	1	1	4	Q6IAA8	Q6IAA8 [48-60]		0	1388.76								5933	Redundant	Light	High	Peak Found	High	0.2	0.0001192	7.189e-08	4.11	64.02
	TRUE	High	[R].TDEQALLSSILAK.[T]	1xLabel:13C(6)15N(2) [K13]	1.56694e-07	9.1126e-05	1	1	10	Q6IAA8	Q6IAA8 [48-60]		0	1396.78	1.065	0.947708	0	96.9	103.1	4.93007e+07	4.36864e+07	5933		Heavy	Peak Found	High	High	0.45	0.0001192	6.636e-08	5	64.02
TRUE	High	Master Protein	O15126	Secretory carrier-associated membrane protein 1 OS=Homo sapiens OX=9606 GN=SCAMP1 PE=1 SV=2	0	160.613	36	9	55	9	338	37.9	7.42	209.25	9	Pf04144	9522	ENSG00000085365	SCAMP1	hsa:9522; O15126; O43587; Q6FG23; Q96BX1; Q96QK5		Neutrophil degranulation		1	0	0.754	0.0686982	46.09	111	89	8.54252e+07	5.70057e+07	High	High	1	Met-loss+Acetyl [N-Term]
	Checked	Confidence	Annotated Sequence	Modifications	Qvality PEP	Qvality q-value	# Protein Groups	# Proteins	# PSMs	Master Protein Accessions	Positions in Master Proteins	Modifications in Master Proteins	# Missed Cleavages	Theo. MH+ [Da]	Abundance Ratio: (Heavy) / (Light)	Abundance Ratio P-Value: (Heavy) / (Light)	Abundance Ratio Variability [%]: (Heavy) / (Light)	Abundances (Grouped): Light	Abundances (Grouped): Heavy	Abundance: F2: Light, Sample	Abundance: F2: Heavy, Sample	Precursor Quan Result ID	Quan Info	Quan Channel	Found in Sample: [S2] F2: Light, Sample	Found in Sample: [S4] F2: Heavy, Sample	Confidence (by Search Engine): Sequest HT	DeltaM [ppm] (by Search Engine): Sequest HT	Percolator q-Value (by Search Engine): Sequest HT	Percolator PEP (by Search Engine): Sequest HT	XCorr (by Search Engine): Sequest HT	Top Apex RT [min]
	TRUE	High	[K].AQQEFATGVMSNK.[T]		9.33865e-06	9.1126e-05	1	1	2	O15126	O15126 [299-311]		0	1410.67	0.874	0.323943	0	106.7	93.3	9739903	7081618	565		Light	High	Peak Found	High	-0.68	0.0001192	4.695e-06	4.1	25.34
	TRUE	High	[K].AQQEFATGVMSNK.[T]	1xLabel:13C(6)15N(2) [K13]	9.10916e-07	9.1126e-05	1	1	2	O15126	O15126 [299-311]		0	1418.68								565	Redundant	Heavy	Peak Found	High	High	0.68	0.0001192	4.163e-07	4.36	25.34
	TRUE	High	[K].AQQEFATGVMSNK.[T]	1xOxidation [M10]	2.8955e-06	9.1126e-05	1	1	7	O15126	O15126 [299-311]		0	1426.66	1.515	0.126029	0	79.5	120.5	1.09766e+06	1.38411e+06	566		Light	High	Peak Found	High	-0.41	0.0001192	1.39e-06	4.21	18.17
	TRUE	High	[K].AQQEFATGVMSNK.[T]	1xOxidation [M10]; 1xLabel:13C(6)15N(2) [K13]	6.88045e-06	9.1126e-05	1	1	7	O15126	O15126 [299-311]		0	1434.68								566	Redundant	Heavy	Peak Found	High	High	-0.31	0.0001192	3.41e-06	3.44	18.17
	TRUE	High	[K].EHALAQAELLK.[R]		9.64227e-05	9.1126e-05	1	1	1	O15126	O15126 [79-89]		0	1222.68	1.158	0.597309	0	92.7	107.3	1.37319e+06	1.32263e+06	1502		Light	High	Peak Found	High	-0.64	0.0001192	5.335e-05	2.08	26.63
	TRUE	High	[K].EHALAQAELLK.[R]	1xLabel:13C(6)15N(2) [K11]	9.37807e-07	9.1126e-05	1	1	1	O15126	O15126 [79-89]		0	1230.69								1502	Redundant	Heavy	Peak Found	High	High	-0.81	0.0001192	4.288e-07	3.16	26.63
	TRUE	High	[K].EHALAQAELLKR.[Q]		0.012587	0.00122778	1	1	1	O15126	O15126 [79-90]		1	1378.78	1.197	0.483939	0	91.1	108.9	16595560	16524198	1503		Light	High	Peak Found	High	-0.42	0.001157	0.008478	2.23	22.55
	TRUE	High	[K].EHALAQAELLKR.[Q]	1xLabel:13C(6)15N(2) [K11]; 1xLabel:13C(6)15N(4) [R12]	0.00304725	0.000477939	1	1	1	O15126	O15126 [79-90]		1	1396.8								1503	Redundant	Heavy	Peak Found	High	High	-0.04	0.0004125	0.001942	1.61	22.55
	TRUE	High	[K].MPNVPNTQPAIMKPTEEHPAYTQIAK.[E]		1.61134e-05	9.1126e-05	1	1	2	O15126	O15126 [53-78]		0	2906.45	0.594	0.00135788	0	125.5	74.5	11655732	5.7606e+06	4420		Light	High	Peak Found	High	0.05	0.0001192	8.321e-06	4.29	43.02
	TRUE	High	[K].MPNVPNTQPAIMKPTEEHPAYTQIAK.[E]	2xLabel:13C(6)15N(2) [K13; K26]	6.63472e-06	9.1126e-05	1	1	1	O15126	O15126 [53-78]		0	2922.48								4420	Redundant	Heavy	Peak Found	High	High	0.61	0.0001192	3.296e-06	4.33	43.02
	TRUE	High	[K].MPNVPNTQPAIMKPTEEHPAYTQIAK.[E]	1xDeamidated [N]; 1xOxidation [M]	0.00325139	0.000477939	1	1	2	O15126	O15126 [53-78]		0	2923.43	100	1e-17			200		1.72785e+06	4417		Light	High	Peak Found	High	4.92	0.0004125	0.002088	3
	TRUE	High	[K].MPNVPNTQPAIMKPTEEHPAYTQIAK.[E]	1xOxidation [M]; 2xLabel:13C(6)15N(2) [K13; K26]	0.0004877	9.1126e-05	1	1	3	O15126	O15126 [53-78]		0	2938.48	0.648	0.0203429	0	121.4	78.6	6222222	3.35303e+06	4418		Heavy	Peak Found	High	High	1.26	0.0001192	0.0002891	3.32	37.05
	TRUE	High	[K].MPNVPNTQPAIMKPTEEHPAYTQIAK.[E]	2xOxidation [M1; M12]; 2xLabel:13C(6)15N(2) [K13; K26]	0.000681114	9.1126e-05	1	1	1	O15126	O15126 [53-78]		0	2954.47	0.235	2.59059e-09	0	161.9	38.1	2.58429e+06	505317	4416		Heavy	Peak Found	High	High	0.28	0.0001192	0.0004115	2.79	31.77
	TRUE	High	[-].MSDFDSNPFADPDLNNPFKDPSVTQVTR.[N]	1xMet-loss+Acetyl [N-Term]	0.00011734	9.1126e-05	1	1	2	O15126	O15126 [1-28]	O15126 1xMet-loss+Acetyl [N-Term]	1	3065.41	0.707	0.0716544	0	117.2	82.8	2605236	1532227	4462		Light	High	Peak Found	High	-0.17	0.0001192	6.558e-05	3.93	73.56
	TRUE	High	[R].NVPPGLDEYNPFSDSR.[T]		0.000721837	9.1126e-05	1	1	2	O15126	O15126 [29-44]		0	1806.83	0.754	0.10873	0	114	86	5.95741e+06	3.7387e+06	4876		Light	High	Peak Found	High	0.24	0.0001192	0.0004361	2.34	57.25
	TRUE	High	[R].NVPPGLDEYNPFSDSR.[T]	1xLabel:13C(6)15N(4) [R16]	0.0476475	0.00301856	1	1	1	O15126	O15126 [29-44]		0	1816.84								4876	Redundant	Heavy	Peak Found	High	High	0.72	0.002641	0.034	2.31	57.25
	TRUE	High	[K].TVQTAAANAASTAASSAAQNAFK.[G]		9.42823e-10	9.1126e-05	1	1	3	O15126	O15126 [312-334]		0	2152.06	0.343	1.09511e-09	0	148.9	51.1	17684529	5051082	6339		Light	High	Peak Found	High	-0.5	0.0001192	3.224e-10	5.76	49.15
	TRUE	High	[K].TVQTAAANAASTAASSAAQNAFKGNQI.[-]		3.75065e-07	9.1126e-05	1	1	2	O15126	O15126 [312-338]		1	2564.27								6340	Redundant	Light	High	Peak Found	High	-0.21	0.0001192	1.653e-07	6.41	55.73
	TRUE	High	[K].TVQTAAANAASTAASSAAQNAFKGNQI.[-]	1xLabel:13C(6)15N(2) [K23]	8.31274e-06	9.1126e-05	1	1	2	O15126	O15126 [312-338]		1	2572.28	1.094	0.83735	0	95.5	104.5	9909501	9024375	6340		Heavy	Peak Found	High	High	-0.51	0.0001192	4.172e-06	5.27	55.73
TRUE	High	Master Protein	P0DMV9	Heat shock 70 kDa protein 1B OS=Homo sapiens OX=9606 GN=HSPA1B PE=1 SV=1	0	160.456	30	15	56	14	641	70	5.66	176.18	15	Pf00012	3303; 3304	ENSG00000204388; ENSG00000212866; ENSG00000224501; ENSG00000231555; ENSG00000232804	HSPA1B	B4E3B6; hsa:3303; hsa:3304; P08107; P0DMV9; P19790; Q5JQI4; Q5SP17; Q9UQL9; Q9UQM0	Apoptosis modulation and signaling; Parkin-ubiquitin proteasomal system pathway; MAPK signaling pathway; Apoptosis modulation by HSP70; VEGFA-VEGFR2 signaling pathway	Neutrophil degranulation; HSP90 chaperone cycle for steroid hormone receptors (SHR) in the presence of ligand; Regulation of HSF1-mediated heat shock response; Attenuation phase	Spliceosome; MAPK signaling pathway; Protein processing in endoplasmic reticulum; Endocytosis; Longevity regulating pathway; Antigen processing and presentation; Estrogen signaling pathway; Prion disease; Legionellosis; Toxoplasmosis; Measles; Lipid and atherosclerosis	22	0	1.33	0.137994	14.99	88.9	111.1	1.96478e+08	2.04128e+08	High	High	1
	Checked	Confidence	Annotated Sequence	Modifications	Qvality PEP	Qvality q-value	# Protein Groups	# Proteins	# PSMs	Master Protein Accessions	Positions in Master Proteins	Modifications in Master Proteins	# Missed Cleavages	Theo. MH+ [Da]	Abundance Ratio: (Heavy) / (Light)	Abundance Ratio P-Value: (Heavy) / (Light)	Abundance Ratio Variability [%]: (Heavy) / (Light)	Abundances (Grouped): Light	Abundances (Grouped): Heavy	Abundance: F2: Light, Sample	Abundance: F2: Heavy, Sample	Precursor Quan Result ID	Quan Info	Quan Channel	Found in Sample: [S2] F2: Light, Sample	Found in Sample: [S4] F2: Heavy, Sample	Confidence (by Search Engine): Sequest HT	DeltaM [ppm] (by Search Engine): Sequest HT	Percolator q-Value (by Search Engine): Sequest HT	Percolator PEP (by Search Engine): Sequest HT	XCorr (by Search Engine): Sequest HT	Top Apex RT [min]
	TRUE	High	[K].AFYPEEISSMVLTK.[ML]		2.40389e-05	9.1126e-05	1	2	2	P0DMV9	P0DMV9 [113-126]		0	1614.81	1.188	0.527497	0	91.4	108.6	8.15263e+06	8.06124e+06	203		Light	High	Peak Found	High	0.1	0.0001192	1.261e-05	2.49	65.29
	TRUE	High	[K].AFYPEEISSMVLTK.[ML]	1xOxidation [M10]	6.90082e-05	9.1126e-05	1	2	1	P0DMV9	P0DMV9 [113-126]		0	1630.8	1.181	0.577147	0	91.7	108.3	6.04279e+06	5937293	204		Light	High	Peak Found	High	0.85	0.0001192	3.778e-05	2.95	54.8
	TRUE	High	[K].AFYPEEISSMVLTK.[ML]	1xOxidation [M10]; 1xLabel:13C(6)15N(2) [K14]	3.03383e-05	9.1126e-05	1	2	2	P0DMV9	P0DMV9 [113-126]		0	1638.82								204	Redundant	Heavy	Peak Found	High	High	0.83	0.0001192	1.605e-05	3.17	54.8
	TRUE	High	[K].AQIHDLVLVGGSTR.[I]		0.00298207	0.000477939	1	1	1	P0DMV9	P0DMV9 [329-342]		0	1465.81	1.33	0.257858	0	85.8	114.2	5.02669e+06	5563763	557		Light	High	Peak Found	High	1.23	0.0004125	0.001911	2.22	35.43
	TRUE	High	[K].ATAGDTHLGGEDFDNR.[L]		0.0418313	0.00273013	1	4	2	P0DMV9	P0DMV9 [221-236]		0	1675.73	1.285	0.289882	0	87.5	112.5	7782001	8323299	630		Light	High	Peak Found	High	0.12	0.002423	0.02981	1.78	20.69
	TRUE	High	[K].DAGVIAGLNVLR.[I]		2.30393e-07	9.1126e-05	1	2	2	P0DMV9	P0DMV9 [160-171]		0	1197.69	1.378	0.141977	0	84.1	115.9	20408982	23403844	768		Light	High	Peak Found	High	0.06	0.0001192	9.945e-08	3.6	58.02
	TRUE	High	[K].DAGVIAGLNVLR.[I]	1xLabel:13C(6)15N(4) [R12]	9.8679e-07	9.1126e-05	1	2	2	P0DMV9	P0DMV9 [160-171]		0	1207.7								768	Redundant	Heavy	Peak Found	High	High	0.09	0.0001192	4.504e-07	3.65	58.02
	TRUE	High	[K].ELEQVCNPIISGLYQGAGGPGPGGFGAQGPK.[G]	1xCarbamidomethyl [C6]	0.143353	0.00969737	1	1	1	P0DMV9	P0DMV9 [598-628]		0	3055.49	0.209	8.75574e-08	0	165.4	34.6	703916	122380	1549		Light	High	Peak Found	High	2.95	0.007952	0.1104	3.34	70.15
	TRUE	High	[K].FGDPVVQSDMK.[H]		0.00279472	0.000477939	1	1	1	P0DMV9	P0DMV9 [78-88]		0	1222.58	1.383	0.187878	0	83.9	116.1	4668069	5373685	1880		Light	High	Peak Found	High	0.31	0.0004125	0.001785	2.47	29.34
	TRUE	High	[K].FGDPVVQSDMK.[H]	1xLabel:13C(6)15N(2) [K11]	0.0220244	0.00166208	1	1	1	P0DMV9	P0DMV9 [78-88]		0	1230.59								1880	Redundant	Heavy	Peak Found	High	High	0.18	0.001494	0.01519	2.04	29.34
	TRUE	High	[K].HWPFQVINDGDKPK.[V]		3.87324e-06	9.1126e-05	1	1	2	P0DMV9	P0DMV9 [89-102]		0	1680.85	1.709	0.0147172	0	73.8	126.2	6.01999e+06	8563256	2619		Light	High	Peak Found	High	0.41	0.0001192	1.882e-06	4.04	42.54
	TRUE	High	[K].HWPFQVINDGDKPK.[V]	2xLabel:13C(6)15N(2) [K12; K14]	1.37308e-05	9.1126e-05	1	1	1	P0DMV9	P0DMV9 [89-102]		0	1696.88								2619	Redundant	Heavy	Peak Found	High	High	0.26	0.0001192	7.016e-06	4.22	42.54
	TRUE	High	[K].LDKAQIHDLVLVGGSTR.[I]	1xLabel:13C(6)15N(2) [K3]; 1xLabel:13C(6)15N(4) [R17]	0.0103117	0.00122778	1	1	2	P0DMV9	P0DMV9 [326-342]		1	1840.04	1.465	0.153003	0	81.1	118.9	1.45673e+06	1.77542e+06	2931		Heavy	Peak Found	High	High	-1.18	0.001089	0.00689	2.02	42.85
	TRUE	High	[R].IINEPTAAAIAYGLDR.[RT]		2.84816e-09	9.1126e-05	1	2	2	P0DMV9	P0DMV9 [172-187]		0	1687.9	1.091	0.843143	0	95.6	104.4	3.08129e+07	2.79759e+07	3420		Light	High	Peak Found	High	-0.46	0.0001192	1.018e-09	5.01	57.05
	TRUE	High	[R].IINEPTAAAIAYGLDR.[RT]	1xLabel:13C(6)15N(4) [R16]	6.52628e-09	9.1126e-05	1	2	4	P0DMV9	P0DMV9 [172-187]		0	1697.91								3420	Redundant	Heavy	Peak Found	High	High	-0.72	0.0001192	2.412e-09	4.89	57.05
	TRUE	High	[K].LLQDFFNGR.[D]		0.000222489	9.1126e-05	1	1	2	P0DMV9	P0DMV9 [349-357]		0	1109.57								3444	Redundant	Light	High	Peak Found	High	0.05	0.0001192	0.0001277	2.23	52.62
	TRUE	High	[K].LLQDFFNGR.[D]	1xLabel:13C(6)15N(4) [R9]	0.00123459	9.1126e-05	1	1	2	P0DMV9	P0DMV9 [349-357]		0	1119.58	1.496	0.0554165	0	80.1	119.9	8861635	11032334	3444		Heavy	Peak Found	High	High	1.17	0.0001192	0.0007591	1.97	52.62
	TRUE	High	[R].LVNHFVEEFK.[R]		0.00136638	9.1126e-05	1	1	1	P0DMV9	P0DMV9 [237-246]		0	1261.66	1.578	0.0493011	0	77.6	122.4	5.7836e+06	7594416	3943		Light	High	Peak Found	High	1.46	0.0001192	0.0008471	2.02	38.71
	TRUE	High	[R].LVNHFVEEFK.[R]	1xLabel:13C(6)15N(2) [K10]	0.000923806	9.1126e-05	1	1	1	P0DMV9	P0DMV9 [237-246]		0	1269.67								3943	Redundant	Heavy	Peak Found	High	High	1.14	0.0001192	0.0005629	2.55	38.71
	TRUE	High	[K].NALESYAFNMK.[S]		0.000131817	9.1126e-05	1	2	1	P0DMV9	P0DMV9 [540-550]		0	1287.6								4592	Redundant	Light	High	Peak Found	High	-0.4	0.0001192	7.395e-05	3.21	47.5
	TRUE	High	[K].NALESYAFNMK.[S]	1xDeamidated [N9]	0.0579988	0.00387987	1	2	1	P0DMV9	P0DMV9 [540-550]		0	1288.59	0.103	1e-17	0	181.3	18.7	5915337	507352	4593		Light	High	Peak Found	High	1.95	0.003289	0.04202	2.63	48.19
	TRUE	High	[K].NALESYAFNMK.[S]	1xLabel:13C(6)15N(2) [K11]	3.01185e-05	9.1126e-05	1	2	2	P0DMV9	P0DMV9 [540-550]		0	1295.62	1.351	0.174064	0	85.1	114.9	20001604	22480922	4592		Heavy	Peak Found	High	High	0.24	0.0001192	1.598e-05	3.87	47.5
	TRUE	High	[K].NALESYAFNMK.[S]	1xOxidation [M10]	8.39797e-05	9.1126e-05	1	2	2	P0DMV9	P0DMV9 [540-550]		0	1303.6								4591	Redundant	Light	High	Peak Found	High	0.27	0.0001192	4.626e-05	3.46	36.75
	TRUE	High	[K].NALESYAFNMK.[S]	1xOxidation [M10]; 1xLabel:13C(6)15N(2) [K11]	0.000268774	9.1126e-05	1	2	2	P0DMV9	P0DMV9 [540-550]		0	1311.61	1.334	0.196042	0	85.7	114.3	12995899	14429781	4591		Heavy	Peak Found	High	High	-0.04	0.0001192	0.0001554	3.57	36.75
	TRUE	High	[K].NQVALNPQNTVFDAK.[R]		7.35428e-08	9.1126e-05	1	1	2	P0DMV9	P0DMV9 [57-71]		0	1658.85								4809	Redundant	Light	High	Peak Found	High	0.53	0.0001192	3.024e-08	5.4	40.95
	TRUE	High	[K].NQVALNPQNTVFDAK.[R]	1xLabel:13C(6)15N(2) [K15]	3.09138e-06	9.1126e-05	1	1	2	P0DMV9	P0DMV9 [57-71]		0	1666.86	1.196	0.48425	0	91.1	108.9	29700076	29569656	4809		Heavy	Peak Found	High	High	0.51	0.0001192	1.482e-06	4.71	40.95
	TRUE	High	[K].NQVALNPQNTVFDAKR.[L]		0.000237532	9.1126e-05	1	1	2	P0DMV9	P0DMV9 [57-72]		1	1814.95								4810	Redundant	Light	High	Peak Found	High	-0.02	0.0001192	0.0001364	2.99	34.18
	TRUE	High	[K].NQVALNPQNTVFDAKR.[L]	1xLabel:13C(6)15N(2) [K15]; 1xLabel:13C(6)15N(4) [R16]	0.00354484	0.000477939	1	1	1	P0DMV9	P0DMV9 [57-72]		1	1832.97	1.271	0.30476	0	88.1	111.9	2.21455e+07	2.3413e+07	4810		Heavy	Peak Found	High	High	0.58	0.0004125	0.002271	3.1	34.24
	TRUE	High	[R].TTPSYVAFTDTER.[L]		1.05677e-05	9.1126e-05	3	6	2	P54652; P11142; P0DMV9	P54652 [38-50]; P11142 [37-49]; P0DMV9 [37-49]		0	1487.7	1.152	0.620762	0	92.9	107.1	72766840	69772288	6289	Shared	Light	High	Peak Found	High	-0.26	0.0001192	5.34e-06	3.33	37.84
	TRUE	High	[R].TTPSYVAFTDTER.[L]	1xLabel:13C(6)15N(4) [R13]	4.52598e-05	9.1126e-05	3	6	3	P54652; P11142; P0DMV9	P54652 [38-50]; P11142 [37-49]; P0DMV9 [37-49]		0	1497.71								6289	Redundant	Heavy	Peak Found	High	High	-0.07	0.0001192	2.441e-05	3.5	37.84
TRUE	High	Master Protein	P04075	Fructose-bisphosphate aldolase A OS=Homo sapiens OX=9606 GN=ALDOA PE=1 SV=2	0	160.434	40	14	51	14	364	39.4	8.09	184.6	14	Pf00274	226	ENSG00000149925	ALDOA	B4DXI7; hsa:226; P04075; Q6FH76; Q6FI10; Q96B15; Q9BWD9; Q9UCN2	VEGFA-VEGFR2 signaling pathway; Clear cell renal cell carcinoma pathways; Aerobic glycolysis; 16p11.2 proximal deletion syndrome; Glycolysis and gluconeogenesis; Sudden infant death syndrome (SIDS) susceptibility pathways	Neutrophil degranulation; Platelet degranulation ; Gluconeogenesis; Glycolysis	Glycolysis / Gluconeogenesis; Pentose phosphate pathway; Fructose and mannose metabolism; Metabolic pathways; Carbon metabolism; Biosynthesis of amino acids; HIF-1 signaling pathway	17	0	1.014	0.921123	13.51	98.1	101.9	1.53448e+08	1.32679e+08	High	High	1	Met-loss [N-Term]; Met-loss+Acetyl [N-Term]
	Checked	Confidence	Annotated Sequence	Modifications	Qvality PEP	Qvality q-value	# Protein Groups	# Proteins	# PSMs	Master Protein Accessions	Positions in Master Proteins	Modifications in Master Proteins	# Missed Cleavages	Theo. MH+ [Da]	Abundance Ratio: (Heavy) / (Light)	Abundance Ratio P-Value: (Heavy) / (Light)	Abundance Ratio Variability [%]: (Heavy) / (Light)	Abundances (Grouped): Light	Abundances (Grouped): Heavy	Abundance: F2: Light, Sample	Abundance: F2: Heavy, Sample	Precursor Quan Result ID	Quan Info	Quan Channel	Found in Sample: [S2] F2: Light, Sample	Found in Sample: [S4] F2: Heavy, Sample	Confidence (by Search Engine): Sequest HT	DeltaM [ppm] (by Search Engine): Sequest HT	Percolator q-Value (by Search Engine): Sequest HT	Percolator PEP (by Search Engine): Sequest HT	XCorr (by Search Engine): Sequest HT	Top Apex RT [min]
	TRUE	High	[K].ADDGRPFPQVIK.[S]		2.07214e-06	9.1126e-05	1	1	2	P04075	P04075 [88-99]		0	1342.71								92	Redundant	Light	High	Peak Found	High	0.14	0.0001192	9.787e-07	2.88	29.71
	TRUE	High	[K].ADDGRPFPQVIK.[S]	1xLabel:13C(6)15N(2) [K12]; 1xLabel:13C(6)15N(4) [R5]	0.00443027	0.000596234	1	1	1	P04075	P04075 [88-99]		0	1360.73	0.886	0.348333	0	106.1	93.9	18959986	13971518	92		Heavy	Peak Found	High	High	0.26	0.0005035	0.002872	2.06	29.71
	TRUE	High	[K].FSHEEIAMATVTALRR.[T]		0.00218658	0.000224419	1	1	1	P04075	P04075 [244-259]		1	1831.95	0.01	1e-17		200		1.32283e+06		1974		Light	High	Not Found	High	-0.03	0.0002185	0.001379	2.69	49.96
	TRUE	High	[K].FSHEEIAMATVTALRR.[T]	2xLabel:13C(6)15N(4) [R15; R16]	0.0746968	0.0049864	1	1	1	P04075	P04075 [244-259]		1	1851.96								1974	Redundant	Heavy	Peak Found	High	High	-0.85	0.00412	0.0549	2.22	49.96
	TRUE	High	[K].GGVVGIKVDKGVVPLAGTNGETTTQGLDGLSER.[C]	2xLabel:13C(6)15N(2) [K7; K10]; 1xLabel:13C(6)15N(4) [R33]	0.00862681	0.000914196	1	1	1	P04075	P04075 [102-134]		2	3250.75								2207	No Quan Values	Heavy	Not Found	High	High	-0.22	0.0008339	0.005726	3.14
	TRUE	High	[K].GILAADESTGSIAK.[R]		5.90585e-06	9.1126e-05	1	1	2	P04075	P04075 [29-42]		0	1332.7	1.081	0.884063	0	96.1	103.9	27070792	24344380	2271		Light	High	Peak Found	High	-0.08	0.0001192	2.913e-06	4.77	30.15
	TRUE	High	[K].GILAADESTGSIAK.[R]	1xLabel:13C(6)15N(2) [K14]	4.93872e-05	9.1126e-05	1	1	3	P04075	P04075 [29-42]		0	1340.71								2271	Redundant	Heavy	Peak Found	High	High	0.53	0.0001192	2.656e-05	3.95	30.15
	TRUE	High	[K].GILAADESTGSIAKR.[L]		5.04766e-05	9.1126e-05	1	1	2	P04075	P04075 [29-43]		1	1488.8	1.014	0.856436	0	99.3	100.7	6.73211e+06	5678216	2272		Light	High	Peak Found	High	-0.07	0.0001192	2.724e-05	3.28	24.28
	TRUE	High	[K].GILAADESTGSIAKR.[L]	1xLabel:13C(6)15N(2) [K14]; 1xLabel:13C(6)15N(4) [R15]	0.00150124	9.1126e-05	1	1	1	P04075	P04075 [29-43]		1	1506.82								2272	Redundant	Heavy	Peak Found	High	High	-0.47	0.0001192	0.0009323	3.04	24.28
	TRUE	High	[K].GVVPLAGTNGETTTQGLDGLSER.[C]		1.62183e-10	9.1126e-05	1	1	3	P04075	P04075 [112-134]		0	2272.14	1.106	0.785945	0	95	105	26451061	2.43432e+07	2508		Light	High	Peak Found	High	1.79	0.0001192	5.147e-11	5.17	50.38
	TRUE	High	[K].GVVPLAGTNGETTTQGLDGLSER.[C]	1xLabel:13C(6)15N(4) [R23]	1.04828e-10	9.1126e-05	1	1	3	P04075	P04075 [112-134]		0	2282.15								2508	Redundant	Heavy	Peak Found	High	High	-0.78	0.0001192	3.276e-11	5.4	50.38
	TRUE	High	[K].IGEHTPSALAIMENANVLAR.[Y]		3.21938e-07	9.1126e-05	1	1	2	P04075	P04075 [154-173]		0	2107.1	1.05	0.958989	0	97.5	102.5	3444565	3010696	3130		Light	High	Peak Found	High	-0.23	0.0001192	1.406e-07	4.56	63.48
	TRUE	High	[K].IGEHTPSALAIMENANVLAR.[Y]	1xLabel:13C(6)15N(4) [R20]	9.65491e-07	9.1126e-05	1	1	2	P04075	P04075 [154-173]		0	2117.1								3130	Redundant	Heavy	Peak Found	High	High	-0.18	0.0001192	4.41e-07	4.2	63.48
	TRUE	High	[K].IGEHTPSALAIMENANVLAR.[Y]	1xOxidation [M12]; 1xLabel:13C(6)15N(4) [R20]	0.000182837	9.1126e-05	1	1	1	P04075	P04075 [154-173]		0	2133.1	1.078	0.913957	0	96.3	103.7	1.68607e+06	1.51208e+06	3132		Heavy	Peak Found	High	High	1.32	0.0001192	0.0001044	3.04	46.9
	TRUE	High	[R].IVAPGKGILAADESTGSIAK.[R]		0.0139039	0.00130832	1	1	1	P04075	P04075 [23-42]		1	1898.06	0.973	0.88169	0	101.4	98.6	2.52563e+06	2.0445e+06	3889		Light	High	Peak Found	High	0.1	0.001212	0.00941	2.73	38.18
	TRUE	High	[R].IVAPGKGILAADESTGSIAKR.[L]	2xLabel:13C(6)15N(2) [K6; K20]; 1xLabel:13C(6)15N(4) [R21]	0.0607912	0.00415845	1	1	1	P04075	P04075 [23-43]		2	2080.2	0.861	0.395992	0	107.5	92.5	3827464	2.74125e+06	3890		Heavy	Peak Found	High	High	0.25	0.003498	0.04404	2.15	34.09
	TRUE	High	[-].MPYQYPALTPEQK.[K]	1xMet-loss [N-Term]	0.00203417	0.000224419	1	1	3	P04075	P04075 [1-13]	P04075 1xMet-loss [N-Term]	0	1434.73	1.367	0.154385	0	84.5	115.5	14511593	1.65062e+07	4425		Light	High	Peak Found	High	0.13	0.0002185	0.001285	3.41	34.01
	TRUE	High	[-].MPYQYPALTPEQK.[K]	1xLabel:13C(6)15N(2) [K13]; 1xMet-loss [N-Term]	0.000897387	9.1126e-05	1	1	1	P04075	P04075 [1-13]	P04075 1xMet-loss [N-Term]	0	1442.74								4425	Redundant	Heavy	Peak Found	High	High	0.11	0.0001192	0.0005476	3.46	34.01
	TRUE	High	[-].MPYQYPALTPEQKK.[E]	1xMet-loss [N-Term]	1.98971e-05	9.1126e-05	1	1	4	P04075	P04075 [1-14]	P04075 1xMet-loss [N-Term]	1	1562.82	0.899	0.392402	0	105.3	94.7	2.19539e+07	16425036	4426		Light	High	Peak Found	High	0.03	0.0001192	1.035e-05	4.37	25.19
	TRUE	High	[-].MPYQYPALTPEQKK.[E]	2xLabel:13C(6)15N(2) [K13; K14]; 1xMet-loss [N-Term]	2.86235e-05	9.1126e-05	1	1	2	P04075	P04075 [1-14]	P04075 1xMet-loss [N-Term]	1	1578.85								4426	Redundant	Heavy	Peak Found	High	High	0.21	0.0001192	1.514e-05	4.05	25.19
	TRUE	High	[R].QLLLTADDR.[V]	1xLabel:13C(6)15N(4) [R9]	0.0103117	0.00122778	1	1	1	P04075	P04075 [61-69]		0	1054.58	1.685	0.0216184	0	74.5	125.5	4481670	6.28337e+06	5038		Heavy	Peak Found	High	High	-0.26	0.001089	0.006888	2.49	29.47
	TRUE	High	[K].VDKGVVPLAGTNGETTTQGLDGLSER.[C]		2.16948e-10	9.1126e-05	1	1	2	P04075	P04075 [109-134]		1	2614.33	0.957	0.605737	0	102.2	97.8	15290553	12175417	6449		Light	High	Peak Found	High	0	0.0001192	6.969e-11	6.45	45.75
	TRUE	High	[K].VDKGVVPLAGTNGETTTQGLDGLSER.[C]	1xLabel:13C(6)15N(2) [K3]; 1xLabel:13C(6)15N(4) [R26]	5.64274e-09	9.1126e-05	1	1	2	P04075	P04075 [109-134]		1	2632.35								6449	Redundant	Heavy	Peak Found	High	High	-0.4	0.0001192	2.081e-09	5.2	45.75
	TRUE	High	[K].YTPSGQAGAAASESLFVSNHAY.[-]		2.30654e-09	9.1126e-05	1	1	4	P04075	P04075 [343-364]		0	2228.03									Indistinguishable Channels		Not Found	Not Found	High	0.87	0.0001192	8.167e-10	6.03	51.04
TRUE	High	Master Protein	Q92945	Far upstream element-binding protein 2 OS=Homo sapiens OX=9606 GN=KHSRP PE=1 SV=4	0	156.635	32	14	42	14	711	73.1	7.3	156.21	14	Pf00013, Pf09005	8570	ENSG00000088247	KHSRP	hsa:8570; O00301; Q59EZ9; Q5U4P6; Q92945; Q9UNT5; Q9UQH5	Pre-implantation embryo	ATF4 activates genes in response to endoplasmic reticulum stress; KSRP (KHSRP) binds and destabilizes mRNA		3	0	0.973	0.736294	26.34	120.2	79.8	3.11576e+07	1.72102e+07	High	High	1	Met-loss+Acetyl [N-Term]
	Checked	Confidence	Annotated Sequence	Modifications	Qvality PEP	Qvality q-value	# Protein Groups	# Proteins	# PSMs	Master Protein Accessions	Positions in Master Proteins	Modifications in Master Proteins	# Missed Cleavages	Theo. MH+ [Da]	Abundance Ratio: (Heavy) / (Light)	Abundance Ratio P-Value: (Heavy) / (Light)	Abundance Ratio Variability [%]: (Heavy) / (Light)	Abundances (Grouped): Light	Abundances (Grouped): Heavy	Abundance: F2: Light, Sample	Abundance: F2: Heavy, Sample	Precursor Quan Result ID	Quan Info	Quan Channel	Found in Sample: [S2] F2: Light, Sample	Found in Sample: [S4] F2: Heavy, Sample	Confidence (by Search Engine): Sequest HT	DeltaM [ppm] (by Search Engine): Sequest HT	Percolator q-Value (by Search Engine): Sequest HT	Percolator PEP (by Search Engine): Sequest HT	XCorr (by Search Engine): Sequest HT	Top Apex RT [min]
	TRUE	High	[K].AINQQTGAFVEISR.[Q]	1xLabel:13C(6)15N(4) [R14]	0.00191988	0.000224419	1	1	1	Q92945	Q92945 [449-462]		0	1543.81	1.333	0.270558	0	85.7	114.3	1.28266e+06	1.42272e+06	390		Heavy	Peak Found	High	High	1.84	0.0002185	0.001207	2.93	38.33
	TRUE	High	[R].GGGGPGGGGPGGGSAGGPSQPPGGGGPGIR.[K]	1xLabel:13C(6)15N(4) [R30]	0.000351696	9.1126e-05	1	1	1	Q92945	Q92945 [41-70]		0	2280.07								2187	No Quan Values	Heavy	Not Found	High	High	-0.08	0.0001192	0.0002065	2.75
	TRUE	High	[R].GGGGPGGGGPGGGSAGGPSQPPGGGGPGIRK.[D]		3.7462e-05	9.1126e-05	1	1	2	Q92945	Q92945 [41-71]		1	2398.16								2188	Redundant	Light	High	Peak Found	High	-1.14	0.0001192	2.002e-05	3.41	16.32
	TRUE	High	[R].GGGGPGGGGPGGGSAGGPSQPPGGGGPGIRK.[D]	1xLabel:13C(6)15N(2) [K31]; 1xLabel:13C(6)15N(4) [R30]	1.98366e-06	9.1126e-05	1	1	1	Q92945	Q92945 [41-71]		1	2416.18	0.502	0.00106154	0	133.1	66.9	2.96307e+06	1.23817e+06	2188		Heavy	Peak Found	High	High	0.27	0.0001192	9.363e-07	3.75	16.32
	TRUE	High	[R].GGPPGQFHDNANGGQNGTVQEIMIPAGK.[A]		0.0112323	0.00122778	1	1	1	Q92945	Q92945 [217-244]		0	2791.32	0.71	0.188503	0	117	83	1.56301e+06	922883	2198		Light	High	Peak Found	High	1.48	0.001157	0.007524	3.16	42.26
	TRUE	High	[R].GGPPGQFHDNANGGQNGTVQEIMIPAGK.[A]	1xLabel:13C(6)15N(2) [K28]	0.000274699	9.1126e-05	1	1	1	Q92945	Q92945 [217-244]		0	2799.34								2198	Redundant	Heavy	Peak Found	High	High	-0.5	0.0001192	0.0001594	3.8	42.26
	TRUE	High	[R].GGPPGQFHDNANGGQNGTVQEIMIPAGK.[A]	1xOxidation [M23]	2.84161e-05	9.1126e-05	1	1	1	Q92945	Q92945 [217-244]		0	2807.32								2197	No Quan Values	Light	High	Not Found	High	-0.46	0.0001192	1.503e-05	2.83
	TRUE	High	[R].GGPPGQFHDNANGGQNGTVQEIMIPAGK.[A]	1xOxidation [M23]; 1xLabel:13C(6)15N(2) [K28]	0.000272709	9.1126e-05	1	1	1	Q92945	Q92945 [217-244]		0	2815.33								2197	Redundant	Heavy	Not Found	High	High	0.05	0.0001192	0.0001577	2.7
	TRUE	High	[K].KIGQQPQQPGAPPQQDYTK.[A]		0.00157927	0.000224419	1	1	1	Q92945	Q92945 [628-646]		1	2109.07								2709	No Quan Values	Light	High	Not Found	High	0.6	0.0002185	0.0009857	2.59
	TRUE	High	[K].IGGDAATTVNNSTPDFGFGGQK.[R]		1.00125e-06	9.1126e-05	1	1	1	Q92945	Q92945 [88-109]		0	2154.01	0.01	1e-17		200		954494		3148		Light	High	Not Found	High	0.76	0.0001192	4.581e-07	4.79	46.25
	TRUE	High	[K].IGGDAATTVNNSTPDFGFGGQK.[R]	1xLabel:13C(6)15N(2) [K22]	2.11786e-06	9.1126e-05	1	1	1	Q92945	Q92945 [88-109]		0	2162.02								3148	Redundant	Heavy	Peak Found	High	High	-3.21	0.0001192	9.982e-07	3.23	46.25
	TRUE	High	[K].IGGDAATTVNNSTPDFGFGGQKR.[Q]		7.98117e-05	9.1126e-05	1	1	2	Q92945	Q92945 [88-110]		1	2310.11	1.064	0.9654	0	96.9	103.1	6021645	5330843	3149		Light	High	Peak Found	High	-0.51	0.0001192	4.383e-05	3.56	40.02
	TRUE	High	[K].IGGDAATTVNNSTPDFGFGGQKR.[Q]	2xDeamidated [N11; Q21]	0.0100935	0.00113965	1	1	1	Q92945	Q92945 [88-110]		1	2312.08								3151	No Quan Values	Light	High	Not Found	High	2.97	0.001005	0.00671	3.3
	TRUE	High	[K].IGGDAATTVNNSTPDFGFGGQKR.[Q]	1xLabel:13C(6)15N(2) [K22]; 1xLabel:13C(6)15N(4) [R23]	6.0983e-05	9.1126e-05	1	1	1	Q92945	Q92945 [88-110]		1	2328.13								3149	Redundant	Heavy	Peak Found	High	High	-0.63	0.0001192	3.316e-05	4.69	40.02
	TRUE	High	[R].IGGGIDVPVPR.[H]		0.000691075	9.1126e-05	1	1	1	Q92945	Q92945 [321-331]		0	1079.62	0.01	1e-17		200		5.56164e+06		3156		Light	High	Not Found	High	-2.64	0.0001192	0.000417	3.09	39.37
	TRUE	High	[K].IGQQPQQPGAPPQQDYTK.[A]		1.31445e-05	9.1126e-05	1	1	1	Q92945	Q92945 [629-646]		0	1980.98	0.575	0.0162047	0	127	73	3.00617e+06	1437477	3209		Light	High	Peak Found	High	0.26	0.0001192	6.708e-06	3.42	22.02
[truncated: 11,943 more rows]

## Sheet: summary
processing steps
[truncated: 210 more rows]
