# Supplementary figures and images for: Cryo-EM structure revealed a novel F-actin binding motif in a Legionella pneumophila lysine fatty acyltransferase
Source: eLife journal article supplement (doi:10.7554/elife.106975), 2025-06-17

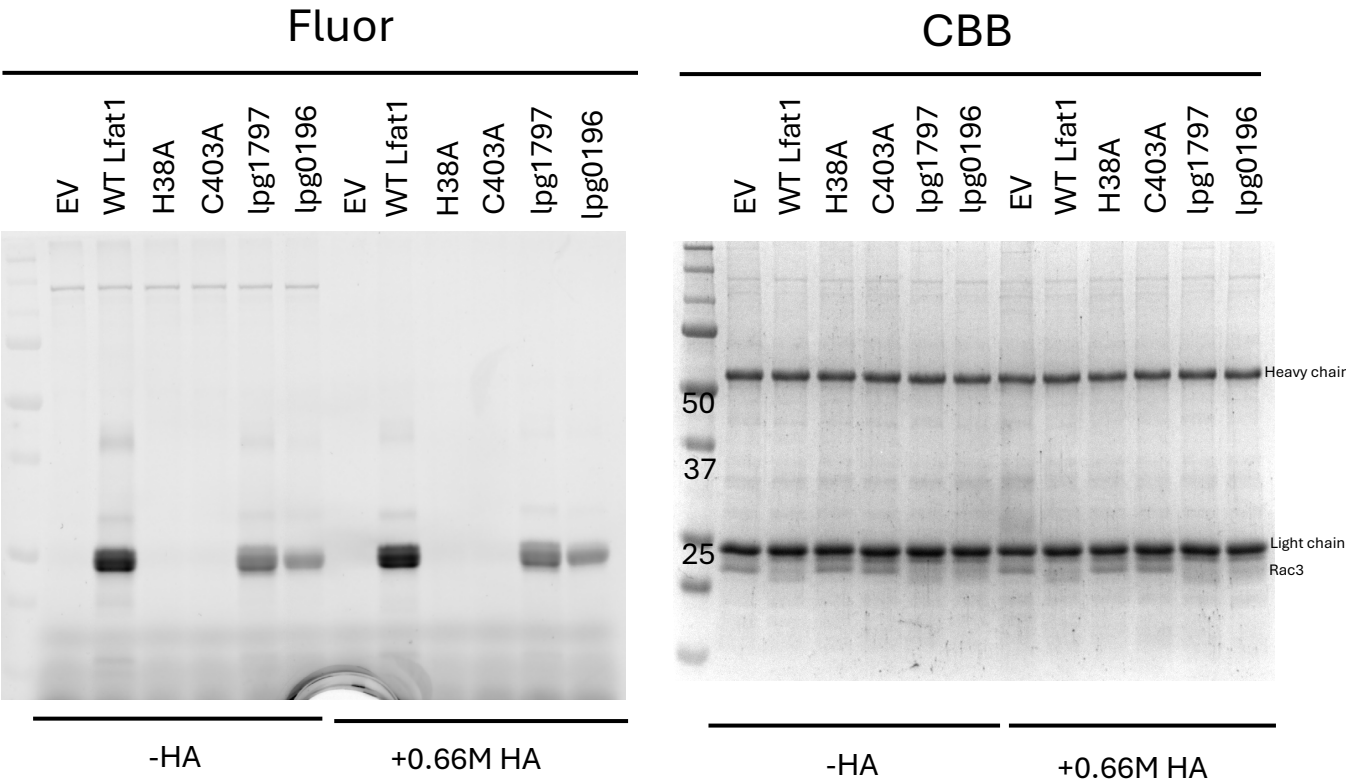

Supplement: fig6-data2 [file Figure 6 Source data 2.pdf › Figure 6 Source data 2.pdf]
